# Supplementary material for: Ubiquitination-activated TAB–TAK1–IKK–NF-κB axis modulates gene expression for cell survival in the lysosomal damage response
Source: bioRxiv preprint, doi:10.1101/2025.03.26.645624, version 2 (2025-07-31)
Supplement: Table S1 [file 645624_file02.xlsx]

## Sheet: Raw count non-redundant
	Control_1	Control_2	Control_3	LLOMe2h_1	LLOMe2h_2	LLOMe2h_3	LLOMe6h_1	LLOMe6h_2	LLOMe6h_3	LLOMe10h_1	LLOMe10h_2	LLOMe10h_3	gene_name
ENSG00000033050.9	1026	1234	1084	1195	870	1025	1247	1236	1025	1950	2522	2386	ABCF2
ENSG00000286169.1	354	334	308	485	256	315	420	396	348	659	656	574	AHRR
ENSG00000271147.8	39	49	40	54	51	53	65	50	44	91	84	88	ARMCX5-GPRASP2
ENSG00000163635.18	145	328	189	883	742	954	830	831	570	688	869	878	ATXN7
ENSG00000271816.1	20	24	19	8	14	9	32	25	20	26	29	29	BMS1P4
ENSG00000287151.1	106	178	152	295	329	364	358	325	242	463	409	454	C2orf27A
ENSG00000114395.10	151	199	214	187	173	148	203	160	149	200	174	182	CYB561D2
ENSG00000286070.1	331	289	383	485	361	408	538	394	232	547	488	539	GGT1
ENSG00000188626.6	0	0	2	0	0	0	0	1	0	0	0	0	GOLGA8M
ENSG00000284024.2	405	476	403	494	436	480	812	786	688	1022	1323	1398	HSPA14
ENSG00000186205.13	1	0	4	3	4	0	4	7	3	5	2	0	MARC1
ENSG00000117791.16	27	45	37	47	26	30	38	28	37	38	34	41	MARC2
ENSG00000145416.13	118	191	156	240	200	203	144	141	94	167	137	93	MARCH1
ENSG00000099785.10	202	322	298	234	276	267	203	177	145	198	169	142	MARCH2
ENSG00000015479.19	3438	3805	3544	4344	3223	3666	4710	3561	2743	4785	4357	4575	MATR3
ENSG00000254093.9	108	133	92	137	91	108	143	126	99	181	222	197	PINX1
ENSG00000168255.20	313	442	486	404	374	403	338	317	241	277	318	316	POLR2J3
ENSG00000272655.2	59	61	63	59	50	51	66	47	31	63	42	42	POLR2J4
ENSG00000277027.1	18	52	0	33	27	0	0	41	86	0	135	63	RMRP
ENSG00000112096.18	987	1003	916	23555	23069	25074	63403	52921	42869	42636	31685	26699	SOD2
ENSG00000284770.2	265	251	269	349	268	300	507	328	265	526	378	435	TBCE
ENSG00000158427.15	30	45	40	55	22	34	38	17	29	63	52	42	TMSB15B
ENSG00000202198.1	29	0	0	0	0	0	0	0	0	0	0	32	7SK
ENSG00000121410.12	55	88	117	101	89	76	83	67	75	80	62	64	A1BG
ENSG00000268895.6	122	177	156	203	139	163	253	212	191	210	185	176	A1BG-AS1
ENSG00000148584.15	0	0	0	0	0	0	0	1	0	0	0	0	A1CF
ENSG00000175899.14	0	1	0	0	1	3	0	0	0	0	0	0	A2M
ENSG00000184389.9	0	0	0	1	0	0	0	0	0	0	0	0	A3GALT2
ENSG00000128274.17	37	57	37	30	35	42	187	198	184	126	211	186	A4GALT
ENSG00000094914.14	526	596	602	587	455	469	447	320	249	514	337	378	AAAS
ENSG00000081760.17	495	657	654	623	465	567	726	520	403	784	737	738	AACS
ENSG00000250420.8	2	1	2	1	0	0	0	0	0	0	0	0	AACSP1
ENSG00000114771.14	0	2	0	0	2	1	0	0	0	0	3	1	AADAC
ENSG00000204518.2	0	2	2	0	0	1	0	0	0	0	0	3	AADACL4
ENSG00000240602.7	0	2	0	1	3	2	3	3	2	2	6	1	AADACP1
ENSG00000109576.14	140	136	145	141	121	116	136	105	66	169	115	157	AADAT
ENSG00000103591.13	666	1051	901	958	944	940	822	635	554	932	714	848	AAGAB
ENSG00000115977.19	974	1385	1079	1315	1283	1301	2340	1897	1603	1937	1617	1651	AAK1
ENSG00000087884.14	74	88	86	77	83	86	165	114	95	201	151	161	AAMDC
ENSG00000127837.9	1121	1397	1315	1453	1163	1244	1816	1544	1403	2333	2277	2316	AAMP
ENSG00000129673.9	2	1	1	3	4	1	1	2	1	4	1	0	AANAT
ENSG00000131043.12	471	744	633	715	593	616	956	1072	959	1331	1838	1692	AAR2
ENSG00000090861.15	2177	2520	2304	3374	2480	2797	4370	2740	2242	4167	3125	3077	AARS
ENSG00000124608.5	349	405	360	298	208	272	275	189	159	377	253	310	AARS2
ENSG00000266967.7	247	363	327	305	300	288	239	201	180	276	272	269	AARSD1
ENSG00000157426.14	79	153	112	132	131	127	69	55	32	120	59	79	AASDH
ENSG00000149313.11	451	642	464	518	473	532	535	466	290	903	817	909	AASDHPPT
ENSG00000008311.15	394	535	550	519	458	476	361	244	200	344	188	263	AASS
ENSG00000275700.5	985	1161	954	1287	1058	1079	1835	1554	1372	2289	2498	2455	AATF
ENSG00000181409.14	2	2	5	6	4	13	5	6	3	6	1	8	AATK
ENSG00000281376.1	0	1	0	1	1	1	1	0	0	0	1	0	ABALON
ENSG00000183044.12	3	11	9	10	11	4	4	3	4	6	5	13	ABAT
ENSG00000283544.1	0	2	2	1	0	0	0	0	0	0	0	0	ABBA01000935.2
ENSG00000165029.16	892	1461	1348	1838	2088	2614	6760	11027	8516	8780	16253	16516	ABCA1
ENSG00000154263.17	0	0	0	0	0	0	1	0	0	0	0	0	ABCA10
ENSG00000251595.7	49	36	42	49	47	14	29	18	21	54	45	40	ABCA11P
ENSG00000144452.15	2	5	4	4	2	3	4	5	2	6	4	1	ABCA12
ENSG00000179869.15	85	106	71	96	69	66	254	266	161	392	307	221	ABCA13
ENSG00000238098.9	5	5	3	5	2	3	5	6	6	9	11	6	ABCA17P
ENSG00000107331.17	1396	2319	2004	1602	1773	1819	1343	1302	1228	997	1046	1002	ABCA2
ENSG00000167972.14	565	712	665	752	557	635	532	428	383	411	367	316	ABCA3
ENSG00000198691.13	0	1	2	2	1	1	3	5	2	6	8	4	ABCA4
ENSG00000154265.16	0	0	0	3	0	2	2	2	3	2	3	2	ABCA5
ENSG00000064687.12	278	411	423	378	348	339	200	262	224	279	246	206	ABCA7
ENSG00000154258.17	0	2	0	0	0	0	0	0	0	0	0	0	ABCA9
ENSG00000135776.5	250	310	298	288	196	240	317	241	206	307	309	267	ABCB10
ENSG00000274099.1	0	0	0	1	0	0	0	0	0	2	2	1	ABCB10P1
ENSG00000261524.1	1	0	0	0	0	2	1	0	3	0	0	0	ABCB10P3
ENSG00000260053.2	0	0	0	4	1	0	0	3	0	3	0	0	ABCB10P4
ENSG00000073734.10	3	1	6	6	5	5	2	2	1	4	7	10	ABCB11
ENSG00000005471.17	0	0	0	6	1	0	2	0	0	0	1	0	ABCB4
ENSG00000004846.16	0	0	0	0	1	2	2	2	1	0	4	1	ABCB5
ENSG00000115657.14	267	322	292	280	203	236	268	177	160	342	210	216	ABCB6
ENSG00000131269.19	143	236	181	204	189	182	159	119	93	248	129	166	ABCB7
ENSG00000197150.12	579	680	672	750	569	599	663	425	411	692	405	443	ABCB8
ENSG00000150967.18	241	308	303	367	271	305	239	219	200	288	248	246	ABCB9
ENSG00000103222.19	2467	3420	3145	3107	2751	2752	3357	3291	2945	4958	5428	5794	ABCC1
ENSG00000124574.15	408	509	468	494	392	438	507	371	352	591	522	568	ABCC10
ENSG00000121270.15	2	1	0	0	1	5	0	3	0	1	13	9	ABCC11
ENSG00000140798.16	0	0	0	0	0	0	0	0	0	1	0	1	ABCC12
ENSG00000023839.12	10	22	12	19	10	13	127	271	216	227	653	535	ABCC2
ENSG00000108846.16	304	595	516	394	602	555	363	516	408	400	482	514	ABCC3
ENSG00000125257.16	462	450	418	579	356	426	525	347	277	751	559	627	ABCC4
ENSG00000114770.17	328	421	415	325	286	315	393	260	237	546	352	458	ABCC5
ENSG00000091262.15	4	5	2	4	7	5	14	3	5	2	5	8	ABCC6
ENSG00000256340.8	0	0	0	0	0	0	0	2	0	1	0	1	ABCC6P1
ENSG00000255277.3	0	3	0	5	0	0	0	0	0	1	1	1	ABCC6P2
ENSG00000069431.11	6	0	0	16	7	13	49	35	24	46	34	37	ABCC9
ENSG00000101986.12	326	436	425	471	412	423	525	621	461	635	684	726	ABCD1
ENSG00000225293.1	0	0	0	0	0	1	0	0	0	0	0	0	ABCD1P4
ENSG00000117528.14	525	727	691	559	508	509	480	302	260	581	363	403	ABCD3
ENSG00000119688.21	248	273	268	299	224	235	529	344	336	749	519	546	ABCD4
ENSG00000164163.11	1595	1981	1623	1822	1614	1649	1317	1185	871	1856	2184	2178	ABCE1
ENSG00000204574.13	1454	1612	1500	2138	1678	1928	2415	2003	1751	2590	2674	2810	ABCF1
ENSG00000242159.1	0	0	0	0	1	0	0	0	0	0	0	0	ABCF2P1
ENSG00000161204.11	553	746	623	536	423	448	930	790	778	1107	1111	1134	ABCF3
ENSG00000118777.12	59	39	26	88	39	44	99	49	37	83	55	51	ABCG2
ENSG00000172350.10	2	4	2	4	3	2	3	6	3	4	5	7	ABCG4
ENSG00000143994.14	2	0	3	2	1	1	0	0	1	0	1	0	ABHD1
ENSG00000144827.9	370	492	447	385	316	318	226	138	95	257	163	210	ABHD10
ENSG00000106077.18	162	127	115	166	84	109	159	121	103	212	210	232	ABHD11
ENSG00000225969.2	6	14	19	19	15	12	23	14	17	13	23	18	ABHD11-AS1
ENSG00000100997.20	959	1101	1027	1288	1007	1013	1282	994	872	1276	1004	993	ABHD12
ENSG00000139826.6	174	224	207	194	206	244	270	231	171	330	326	344	ABHD13
ENSG00000248487.9	185	305	279	283	230	239	176	190	139	204	168	156	ABHD14A
ENSG00000114786.16	16	22	28	23	11	22	13	21	19	23	35	26	ABHD14A-ACY1
ENSG00000114779.19	435	523	537	557	463	416	369	305	276	399	259	266	ABHD14B
ENSG00000168792.5	175	215	198	216	135	160	245	150	145	355	235	238	ABHD15
ENSG00000204427.12	381	549	463	521	445	430	618	462	477	626	372	472	ABHD16A
ENSG00000183260.7	0	0	0	0	0	0	1	0	0	1	2	0	ABHD16B
ENSG00000129968.15	863	1164	1112	1091	977	1069	1144	1124	1088	1338	1629	1466	ABHD17A
ENSG00000198658.4	1	0	2	4	0	1	0	1	0	2	3	0	ABHD17AP1
ENSG00000250536.1	0	1	0	1	1	0	1	1	1	0	1	0	ABHD17AP3
ENSG00000229107.2	0	2	0	1	2	0	0	0	0	2	0	1	ABHD17AP4
ENSG00000263366.2	0	0	1	0	0	2	0	2	0	0	0	1	ABHD17AP5
ENSG00000226981.2	0	2	0	1	0	0	1	0	1	0	0	0	ABHD17AP6
ENSG00000107362.13	110	143	134	103	72	59	294	293	255	358	370	380	ABHD17B
ENSG00000136379.12	279	345	270	243	184	195	261	205	183	307	249	250	ABHD17C
ENSG00000164074.15	77	76	68	86	74	84	108	59	71	118	71	105	ABHD18
ENSG00000140526.18	2904	4873	4121	3381	3784	3728	3927	3211	2816	4592	3306	3712	ABHD2
ENSG00000158201.10	86	28	34	97	37	37	242	187	159	310	257	317	ABHD3
ENSG00000100439.10	707	918	870	990	912	896	1464	995	899	2102	1032	1133	ABHD4
ENSG00000011198.10	529	594	549	739	604	692	1251	1093	767	1613	1310	1136	ABHD5
ENSG00000163686.15	90	119	113	128	91	115	136	112	117	193	117	145	ABHD6
ENSG00000127220.6	233	254	300	296	267	229	177	99	113	235	203	179	ABHD8
ENSG00000136754.17	659	858	729	1056	944	1214	3051	3175	2206	2045	2367	2233	ABI1
ENSG00000138443.16	1500	1940	1677	1791	1562	1673	1562	1361	1014	1927	1502	1675	ABI2
ENSG00000108798.9	0	0	0	0	0	0	0	0	0	0	1	0	ABI3
ENSG00000154175.17	76	81	55	71	56	67	102	93	41	195	126	113	ABI3BP
ENSG00000119328.12	161	223	176	237	228	236	268	192	167	312	264	289	ABITRAM
ENSG00000097007.19	4202	5634	5211	6483	6202	7052	6601	7353	6230	9238	12485	13156	ABL1
ENSG00000143322.21	1225	1535	1344	15960	13455	15207	7527	10003	6977	7256	13262	11304	ABL2
ENSG00000099204.20	774	1152	1034	985	916	1015	832	759	611	538	479	376	ABLIM1
ENSG00000163995.20	0	1	1	1	0	1	1	0	1	0	0	0	ABLIM2
ENSG00000173210.19	1446	1983	1893	2001	1670	1849	3312	3147	2547	4523	4612	4169	ABLIM3
ENSG00000175164.15	0	0	0	0	0	0	1	0	0	0	0	0	ABO
ENSG00000159842.15	4127	5201	4651	5013	4001	4363	6159	5091	4630	5918	4949	4930	ABR
ENSG00000146386.8	253	327	327	373	303	360	523	377	351	477	379	380	ABRACL
ENSG00000163322.14	142	184	154	180	138	147	170	73	56	209	98	121	ABRAXAS1
ENSG00000165660.8	416	604	529	494	478	523	919	960	719	874	1046	1114	ABRAXAS2
ENSG00000146109.5	238	289	333	232	203	209	355	347	282	420	482	463	ABT1
ENSG00000250496.2	0	0	0	0	0	0	0	0	0	0	0	1	ABT1P1
ENSG00000114626.18	191	261	222	288	217	242	476	334	381	619	536	477	ABTB1
ENSG00000166016.6	328	443	353	1187	984	1250	2352	3214	2354	1811	3397	2809	ABTB2
ENSG00000242156.1	0	0	2	0	8	0	1	0	0	1	0	0	AC000041.1
ENSG00000286742.1	0	0	0	1	0	0	0	0	0	0	0	0	AC000065.1
ENSG00000287932.1	0	0	0	0	0	0	0	0	0	0	1	0	AC000065.2
ENSG00000185065.6	9	4	4	6	1	2	4	3	0	9	5	3	AC000068.1
ENSG00000273212.1	0	0	0	1	0	0	0	0	0	0	0	0	AC000068.2
ENSG00000273300.1	0	0	0	0	0	1	0	0	0	0	0	0	AC000068.3
ENSG00000286367.1	1	0	0	0	0	0	0	0	1	0	0	0	AC000072.1
ENSG00000235776.2	2	3	5	3	3	6	0	2	5	1	5	3	AC000089.1
ENSG00000284874.1	0	0	29	9	0	19	0	30	17	0	4	32	AC000093.1
ENSG00000243107.1	1	0	1	1	0	1	0	1	0	0	0	0	AC000120.1
ENSG00000285772.1	0	0	0	0	0	0	0	0	0	0	0	2	AC000120.2
ENSG00000285953.1	0	58	0	54	25	25	30	49	27	47	16	0	AC000120.3
ENSG00000279265.1	1	0	3	3	3	3	5	2	5	0	1	2	AC000123.2
ENSG00000280347.1	22	39	23	22	16	28	33	35	24	33	40	40	AC000123.3
ENSG00000278727.1	3	4	2	1	5	4	0	1	1	0	1	3	AC000403.1
ENSG00000274898.1	1	0	0	0	2	0	0	0	0	0	3	0	AC001226.1
ENSG00000283208.2	3	0	1	0	2	3	0	1	1	0	1	1	AC001226.2
ENSG00000213683.4	5	6	3	4	4	6	7	2	6	9	9	5	AC002056.1
ENSG00000273216.1	0	0	0	0	0	1	0	0	1	1	1	1	AC002059.1
ENSG00000285697.1	0	0	0	1	0	0	0	1	2	0	0	0	AC002059.3
ENSG00000225498.1	0	0	0	1	0	0	0	0	0	0	0	0	AC002064.1
ENSG00000237813.4	0	1	0	1	0	1	0	0	0	0	0	0	AC002066.1
ENSG00000248636.7	2	1	0	2	1	3	2	1	1	4	1	2	AC002070.1
ENSG00000285090.1	6	6	9	6	5	5	8	4	4	6	5	4	AC002074.1
ENSG00000285964.1	0	1	0	0	0	0	0	0	0	0	0	1	AC002074.2
ENSG00000237729.2	0	0	6	1	1	5	6	5	3	0	3	6	AC002075.2
ENSG00000234695.1	0	0	0	0	0	0	0	0	1	0	0	1	AC002076.1
ENSG00000258924.4	0	0	16	25	0	16	0	28	12	0	0	17	AC002094.1
ENSG00000248101.2	13	4	14	14	13	18	0	19	0	37	36	19	AC002116.1
ENSG00000267698.1	1	0	0	1	0	1	2	1	1	0	0	1	AC002116.2
ENSG00000235560.4	1	6	2	3	1	3	4	2	1	5	6	5	AC002310.1
ENSG00000239791.2	1	1	1	0	1	1	0	0	0	2	0	0	AC002310.2
ENSG00000260494.1	0	0	0	2	0	0	0	0	1	0	0	1	AC002310.3
ENSG00000261459.1	0	2	0	0	0	0	4	0	0	0	0	0	AC002310.4
ENSG00000278922.1	2	1	0	1	6	4	2	2	0	1	3	1	AC002310.5
ENSG00000278993.1	1	11	7	19	13	13	3	8	10	11	7	18	AC002350.2
ENSG00000258240.6	0	0	0	0	0	0	1	0	0	0	0	0	AC002351.1
ENSG00000225676.2	0	0	0	0	3	2	0	1	1	2	0	0	AC002378.1
ENSG00000250282.1	0	0	0	0	0	0	0	0	0	1	0	0	AC002401.2
ENSG00000276851.1	65	97	74	68	61	73	60	53	46	42	38	54	AC002401.4
ENSG00000237819.5	1	3	3	3	6	3	3	5	1	0	5	4	AC002454.1
ENSG00000223969.6	0	3	0	3	7	3	2	10	1	4	11	3	AC002456.1
ENSG00000251154.1	0	0	0	0	1	0	0	0	0	0	0	0	AC002456.2
ENSG00000287292.1	3	3	3	4	3	5	1	0	2	3	4	2	AC002460.2
ENSG00000241764.4	11	27	18	30	29	23	67	66	65	74	110	96	AC002467.1
ENSG00000226872.2	1	0	0	0	0	0	0	0	0	3	0	0	AC002472.1
ENSG00000284060.1	5	0	0	0	0	0	0	0	0	0	0	0	AC002472.2
ENSG00000232759.1	124	186	168	172	162	164	100	103	78	119	109	116	AC002480.1
ENSG00000232949.2	56	146	139	100	95	128	68	91	87	105	117	112	AC002480.2
ENSG00000214111.3	0	0	0	0	0	0	0	0	0	0	1	0	AC002504.1
ENSG00000261457.3	0	0	0	1	0	0	0	0	0	1	1	0	AC002519.2
ENSG00000233247.3	1	3	2	3	1	4	1	5	2	0	1	3	AC002524.1
ENSG00000261312.1	0	0	0	0	0	0	0	0	0	0	1	0	AC002550.1
ENSG00000276571.1	0	0	0	0	0	1	0	2	0	2	1	0	AC002550.2
ENSG00000227782.2	0	1	3	3	0	0	1	1	1	0	0	0	AC002553.1
ENSG00000275413.1	0	1	0	0	0	0	0	0	0	0	0	0	AC002553.2
ENSG00000268193.5	1	0	0	0	0	2	0	1	0	0	0	1	AC002985.1
ENSG00000257767.3	19	24	31	35	12	0	22	23	26	70	15	0	AC002996.1
ENSG00000269533.5	1	5	3	3	1	2	3	1	0	1	0	2	AC003002.3
ENSG00000268107.6	5	14	10	2	4	12	19	7	10	17	30	31	AC003005.1
ENSG00000268266.1	0	0	0	1	0	0	0	0	0	0	4	0	AC003005.2
ENSG00000269026.2	0	0	1	0	2	0	0	2	0	0	0	0	AC003006.1
ENSG00000267446.1	1	0	0	0	0	0	0	0	0	0	0	0	AC003070.2
ENSG00000225971.1	1	0	5	2	0	1	0	1	1	2	1	0	AC003071.1
ENSG00000250318.1	3	6	8	4	6	3	8	4	9	11	6	7	AC003072.1
ENSG00000287672.1	4	6	6	7	9	6	3	2	0	1	3	5	AC003086.1
ENSG00000236453.5	1	2	2	9	12	20	66	46	53	83	117	100	AC003092.1
ENSG00000287093.1	0	1	0	2	0	0	0	0	0	0	0	0	AC003093.1
ENSG00000228768.3	0	0	0	0	1	0	0	0	0	0	0	0	AC003101.1
ENSG00000278546.1	1	0	1	0	2	1	0	1	0	0	1	3	AC003101.2
ENSG00000260793.2	9	11	9	7	5	12	9	5	7	8	10	3	AC003102.1
ENSG00000279159.1	0	0	0	1	0	0	2	2	1	0	1	0	AC003681.1
ENSG00000279825.1	0	0	0	0	0	0	0	0	0	1	0	0	AC003957.1
ENSG00000234859.5	0	2	0	1	1	0	2	1	0	1	0	0	AC003958.2
ENSG00000263280.2	2	1	1	2	0	1	1	0	0	0	1	0	AC003965.1
ENSG00000236536.1	1	0	2	0	1	0	0	0	1	0	0	0	AC003986.3
ENSG00000228113.7	0	0	0	1	0	0	0	0	0	0	0	0	AC003991.1
ENSG00000254003.1	0	0	0	0	0	0	1	0	0	0	0	0	AC003991.2
ENSG00000257624.1	0	0	0	0	0	1	0	0	0	0	0	0	AC004024.1
ENSG00000196656.7	1081	1205	1222	1241	908	1054	1110	950	950	1109	1279	1226	AC004057.1
ENSG00000216425.4	1	0	0	0	0	0	0	0	0	0	0	0	AC004066.1
ENSG00000273447.1	0	3	2	3	0	1	3	1	0	2	2	2	AC004067.1
ENSG00000251259.1	15	8	13	13	18	23	30	19	11	21	19	16	AC004069.1
ENSG00000276449.1	4	7	4	0	1	1	3	2	0	5	2	2	AC004076.2
ENSG00000254180.2	1	1	0	1	0	0	1	0	1	2	0	0	AC004083.1
ENSG00000213798.3	0	0	0	0	0	0	0	0	0	0	0	1	AC004129.1
ENSG00000271133.5	1	3	5	1	3	4	3	1	3	1	2	1	AC004130.2
ENSG00000263272.1	2	0	3	4	5	0	4	2	2	3	10	1	AC004148.1
ENSG00000267666.2	0	2	3	3	3	1	5	3	0	5	4	4	AC004156.1
ENSG00000230333.6	0	0	0	0	0	0	1	0	0	0	0	0	AC004160.1
ENSG00000267778.1	0	0	2	0	1	1	1	1	0	0	0	0	AC004221.1
ENSG00000267618.5	0	2	0	0	0	0	0	0	0	0	0	0	AC004223.3
ENSG00000263212.2	0	0	3	0	0	0	0	0	0	0	0	0	AC004224.2
ENSG00000234477.1	0	0	0	0	1	0	0	0	0	0	1	2	AC004231.1
ENSG00000279031.1	1	0	1	1	0	1	0	0	0	0	1	0	AC004232.2
ENSG00000262362.1	0	0	0	0	0	0	0	0	0	0	1	0	AC004233.1
ENSG00000272079.2	7	12	5	14	13	9	13	9	16	24	15	9	AC004233.2
ENSG00000274367.1	0	0	0	0	1	0	0	1	0	0	0	0	AC004233.3
ENSG00000257433.6	5	3	8	13	3	11	2	4	4	16	6	5	AC004241.1
ENSG00000274902.1	1	0	0	1	0	0	0	0	0	2	0	0	AC004241.2
ENSG00000276390.1	1	4	0	0	0	3	0	0	1	0	2	2	AC004241.3
ENSG00000280054.1	0	0	0	0	0	0	0	1	0	0	0	0	AC004241.5
ENSG00000275936.1	0	0	0	1	0	0	0	0	0	0	0	0	AC004263.1
ENSG00000286067.1	0	1	0	0	1	0	0	0	0	0	0	1	AC004263.2
ENSG00000268812.3	6	10	8	13	11	20	8	4	1	3	5	6	AC004264.1
ENSG00000279699.1	0	4	5	4	5	7	5	9	13	7	10	12	AC004264.2
ENSG00000285303.1	0	1	0	0	0	0	0	0	0	0	0	0	AC004381.4
ENSG00000235979.9	0	0	0	1	0	0	0	0	0	0	0	0	AC004448.2
ENSG00000261204.1	0	0	0	1	1	0	1	2	0	4	3	3	AC004449.1
ENSG00000146677.7	0	5	4	2	2	5	0	2	5	1	3	1	AC004453.1
ENSG00000279853.1	0	0	0	0	0	0	0	0	0	0	0	1	AC004453.2
ENSG00000281530.1	1	1	0	0	0	1	2	0	1	1	1	1	AC004461.2
ENSG00000268069.2	1	10	9	6	4	7	1	3	5	4	0	0	AC004466.1
ENSG00000274737.1	0	1	0	0	1	0	0	1	2	0	0	2	AC004466.2
ENSG00000272682.1	0	0	0	0	0	0	0	2	0	0	11	2	AC004471.2
ENSG00000263412.1	4	5	4	8	2	2	4	4	0	6	6	9	AC004477.1
ENSG00000278765.1	1	0	0	0	0	0	0	1	0	1	0	0	AC004477.3
ENSG00000272072.1	0	3	2	3	0	1	1	2	1	0	1	0	AC004492.1
ENSG00000262312.2	1	0	0	0	0	0	0	0	0	1	0	0	AC004494.1
ENSG00000286921.1	0	0	0	0	0	0	0	0	1	0	0	0	AC004522.4
ENSG00000274177.1	0	0	4	0	0	0	0	0	0	0	2	0	AC004528.2
ENSG00000214870.9	0	0	0	0	0	0	0	0	0	1	0	0	AC004540.1
ENSG00000225071.1	19	22	18	18	15	15	14	4	14	14	31	18	AC004552.1
ENSG00000266088.6	6	8	2	7	2	2	0	0	0	4	7	5	AC004585.1
ENSG00000251239.1	1	1	1	1	0	0	0	0	1	1	0	0	AC004590.1
ENSG00000267394.1	0	0	0	0	0	0	1	0	0	0	0	0	AC004596.1
ENSG00000275468.1	0	0	0	0	0	3	0	4	0	0	1	0	AC004678.1
ENSG00000285897.1	5	2	0	0	0	0	1	1	0	0	0	1	AC004687.2
ENSG00000286788.1	2	1	0	0	4	1	0	0	0	0	0	0	AC004687.3
ENSG00000213717.3	0	0	0	0	0	0	1	0	0	0	0	0	AC004692.1
ENSG00000282936.2	28	48	44	48	39	42	55	53	46	43	69	79	AC004706.3
ENSG00000253102.1	2	1	4	2	1	2	0	1	6	1	2	2	AC004707.1
ENSG00000227495.1	1	2	0	0	0	0	0	0	0	0	0	0	AC004771.1
ENSG00000234203.1	0	0	0	1	0	0	0	0	0	0	0	0	AC004771.2
ENSG00000262227.1	3	0	8	3	5	2	1	1	2	5	2	2	AC004771.3
ENSG00000262429.1	0	0	0	1	0	0	0	0	1	0	0	0	AC004771.4
ENSG00000262678.1	0	0	0	0	0	2	0	0	0	0	0	0	AC004771.5
ENSG00000282943.1	0	0	0	0	0	0	0	0	0	1	2	1	AC004784.1
ENSG00000240399.1	0	1	3	1	2	3	3	1	1	4	7	3	AC004801.2
ENSG00000276814.1	2	3	1	2	1	1	0	0	1	1	4	1	AC004801.6
ENSG00000250132.6	37	45	32	30	32	34	28	15	17	62	49	45	AC004803.1
ENSG00000266076.1	0	0	0	0	0	0	4	0	0	0	0	0	AC004805.1
ENSG00000277283.1	14	34	18	30	24	16	17	8	10	12	6	18	AC004812.2
ENSG00000259153.2	14	21	16	17	19	12	19	9	9	31	12	22	AC004816.1
ENSG00000275630.1	0	0	0	1	0	0	0	3	0	0	0	0	AC004816.2
ENSG00000269927.1	0	0	0	0	0	0	1	0	2	2	2	4	AC004817.3
ENSG00000274818.1	1	6	2	9	7	9	13	4	3	5	20	20	AC004825.2
ENSG00000249590.7	0	3	0	21	8	6	3	4	11	6	31	25	AC004832.3
ENSG00000273350.1	0	1	1	4	4	3	2	0	2	0	2	2	AC004832.5
ENSG00000273428.3	0	2	0	1	2	1	1	0	0	0	1	0	AC004832.6
ENSG00000284523.2	1	0	1	3	0	0	0	0	0	0	1	0	AC004834.1
ENSG00000106540.4	0	3	0	0	0	0	0	0	0	0	0	0	AC004837.1
ENSG00000287584.1	2	1	2	0	0	1	4	0	0	0	1	1	AC004837.4
ENSG00000272854.1	0	1	0	0	3	2	1	0	0	0	0	1	AC004839.2
ENSG00000230914.3	0	0	0	0	0	0	0	0	0	0	4	0	AC004840.1
ENSG00000258376.2	0	0	0	0	0	0	0	2	0	0	0	0	AC004846.1
ENSG00000258944.1	0	2	1	0	0	0	5	1	5	4	2	1	AC004846.2
ENSG00000272768.1	18	19	15	38	40	53	38	73	41	46	86	86	AC004854.2
ENSG00000239636.1	0	0	0	1	0	0	1	1	1	1	2	4	AC004865.2
ENSG00000223829.6	0	2	0	0	0	0	0	0	0	0	0	1	AC004870.2
ENSG00000273419.1	2	1	7	7	8	5	5	3	9	3	11	8	AC004877.1
ENSG00000280149.1	0	1	2	1	1	1	4	3	1	1	1	10	AC004877.2
ENSG00000287967.1	0	0	0	0	1	0	0	1	0	0	1	4	AC004882.3
ENSG00000213361.2	0	1	0	0	0	0	0	0	0	0	0	0	AC004884.1
ENSG00000244198.7	78	97	82	157	126	124	297	287	232	370	342	281	AC004889.1
ENSG00000239719.1	0	1	0	1	0	0	0	1	0	0	3	0	AC004890.1
ENSG00000244560.7	36	52	87	30	50	51	41	15	10	60	49	41	AC004890.2
ENSG00000238109.1	0	0	0	1	0	1	0	1	1	1	3	0	AC004893.1
ENSG00000286305.1	1	0	1	0	2	1	0	0	1	0	1	4	AC004893.3
ENSG00000236018.2	0	0	0	0	0	0	0	1	0	0	0	0	AC004898.1
ENSG00000272240.1	0	1	0	0	1	0	0	0	0	0	0	0	AC004908.1
ENSG00000272812.1	1	0	0	2	3	0	1	0	1	7	3	0	AC004908.2
ENSG00000273402.1	0	0	0	0	0	1	0	0	0	0	1	0	AC004908.3
ENSG00000243797.6	0	1	0	3	0	1	0	1	0	0	0	0	AC004917.1
ENSG00000244701.1	3	1	6	1	0	4	8	2	3	6	4	5	AC004918.1
ENSG00000270157.1	6	10	10	21	7	12	13	4	10	12	17	18	AC004918.4
ENSG00000287519.1	0	0	0	0	0	0	0	0	0	0	0	1	AC004921.2
ENSG00000284292.1	22	59	44	30	44	12	25	92	31	33	62	70	AC004922.1
ENSG00000255306.1	1	0	0	0	0	0	0	0	0	0	1	1	AC004923.4
ENSG00000287574.1	5	2	0	1	0	2	5	8	1	6	3	3	AC004938.2
ENSG00000259209.3	3	0	1	1	0	0	1	0	0	1	0	0	AC004943.1
ENSG00000259768.6	69	62	42	80	50	42	31	22	13	22	11	10	AC004943.2
ENSG00000272745.1	0	0	0	0	0	0	0	0	0	1	0	0	AC004948.1
ENSG00000283117.1	0	0	0	0	0	1	0	0	0	0	1	0	AC004949.1
ENSG00000228434.1	7	4	3	2	13	2	7	5	6	8	4	10	AC004951.1
ENSG00000239556.4	8	6	10	8	5	12	7	6	10	16	6	0	AC004951.2
ENSG00000241057.2	0	3	1	0	0	4	0	0	0	0	3	0	AC004951.3
ENSG00000273432.1	7	10	2	1	3	1	1	6	3	3	5	2	AC004951.4
ENSG00000243554.1	2	3	0	1	2	1	0	1	2	3	0	0	AC004967.1
ENSG00000285725.1	45	36	36	43	24	36	26	18	28	45	24	28	AC004967.2
ENSG00000205485.13	17	31	26	29	32	27	44	76	48	54	124	85	AC004980.1
ENSG00000214243.3	0	0	1	0	0	0	2	2	2	0	1	5	AC004980.2
ENSG00000230305.2	1	0	1	0	0	0	0	0	0	0	0	0	AC004980.3
ENSG00000272732.1	1	0	2	2	0	1	1	0	0	2	0	0	AC004982.1
ENSG00000272894.5	6	4	3	7	0	5	1	0	2	5	3	5	AC004982.2
ENSG00000233225.3	4	4	6	12	2	8	9	9	3	3	9	11	AC004987.2
ENSG00000203446.2	0	0	0	6	1	5	6	19	11	14	23	17	AC004988.1
ENSG00000232756.1	0	0	0	0	0	0	0	0	0	0	1	0	AC004990.1
ENSG00000248751.6	0	31	22	31	7	20	5	0	14	13	8	7	AC004997.1
ENSG00000228532.4	3	5	1	4	0	1	4	3	2	1	3	4	AC005000.1
ENSG00000273387.1	1	4	3	1	3	1	0	1	0	0	0	3	AC005005.3
ENSG00000278920.1	0	0	0	0	1	0	0	0	0	0	1	0	AC005005.4
ENSG00000226671.1	0	0	0	1	0	0	0	0	0	0	0	0	AC005008.1
ENSG00000224280.1	0	0	0	0	0	0	3	1	0	1	0	0	AC005014.1
ENSG00000272361.2	0	1	0	0	0	0	4	0	1	1	1	0	AC005014.2
ENSG00000272647.3	0	0	0	3	0	0	0	0	0	2	0	2	AC005020.2
ENSG00000270462.1	0	0	0	0	0	0	0	0	0	0	0	1	AC005034.2
ENSG00000270996.1	0	0	1	0	0	0	0	0	0	0	0	0	AC005034.4
ENSG00000271452.1	5	6	6	8	2	3	7	3	3	6	7	4	AC005034.5
ENSG00000286045.1	0	2	0	1	1	0	0	1	0	0	1	0	AC005034.6
ENSG00000183308.6	3	1	1	1	0	4	2	2	0	2	2	7	AC005037.1
ENSG00000159239.13	0	0	0	0	0	1	1	3	0	1	1	0	AC005041.1
ENSG00000272183.1	0	0	0	1	0	0	1	1	0	0	0	1	AC005041.3
ENSG00000286883.1	1	0	0	2	6	3	4	1	1	4	3	2	AC005041.5
ENSG00000227331.1	0	0	0	1	0	0	1	0	1	0	1	0	AC005042.1
ENSG00000273055.1	0	0	1	0	0	0	0	0	0	0	0	0	AC005046.1
ENSG00000267052.3	1	6	2	1	3	2	1	0	2	4	1	0	AC005050.1
ENSG00000286013.1	2	8	7	8	9	22	12	19	14	3	19	11	AC005050.2
ENSG00000279601.1	0	0	1	1	0	0	0	0	0	0	0	0	AC005052.1
ENSG00000286366.1	0	1	1	1	3	3	0	1	1	0	1	0	AC005052.2
ENSG00000243004.6	0	0	0	0	0	0	0	0	0	0	1	0	AC005062.1
ENSG00000272918.1	5	6	2	2	1	2	1	0	1	2	2	0	AC005070.3
ENSG00000287631.1	0	1	0	0	0	0	0	0	0	0	0	0	AC005071.1
ENSG00000272219.1	0	0	0	0	0	0	0	0	0	0	0	1	AC005072.1
ENSG00000224046.2	2	4	2	0	1	3	1	2	0	0	2	1	AC005076.1
ENSG00000224273.2	0	0	0	1	0	0	0	0	0	0	0	0	AC005077.2
ENSG00000230882.1	1	0	0	5	1	2	9	1	6	11	3	8	AC005077.4
ENSG00000287815.1	2	2	3	0	2	0	4	6	1	2	3	3	AC005081.1
ENSG00000226816.3	0	0	0	0	0	0	0	0	0	1	1	0	AC005082.1
ENSG00000233834.6	0	0	0	0	1	0	0	0	0	0	2	0	AC005083.1
ENSG00000226624.1	0	1	2	0	0	0	0	0	0	0	0	0	AC005099.1
ENSG00000219039.2	0	0	0	0	0	0	0	0	1	0	0	0	AC005102.1
ENSG00000224232.1	0	0	0	0	0	0	0	0	1	0	0	1	AC005104.2
ENSG00000283517.1	0	0	0	0	0	0	0	1	0	0	0	0	AC005144.1
ENSG00000244480.1	2	5	1	1	4	0	3	0	1	1	1	0	AC005154.2
ENSG00000281039.1	0	0	1	0	0	0	0	0	0	0	0	0	AC005154.5
ENSG00000223561.7	0	0	0	0	0	0	1	0	0	0	1	0	AC005165.1
ENSG00000239622.1	0	0	0	0	0	0	0	0	0	0	1	0	AC005165.2
ENSG00000267405.1	13	12	12	14	13	19	5	6	3	9	8	4	AC005180.1
ENSG00000236352.1	0	0	0	0	0	0	0	0	0	0	0	1	AC005220.1
ENSG00000266709.1	8	10	11	15	14	10	43	94	75	126	311	235	AC005224.3
ENSG00000258603.4	0	0	0	1	0	0	0	0	0	0	0	0	AC005225.2
ENSG00000258695.2	0	0	0	0	0	0	0	0	0	2	0	0	AC005225.3
ENSG00000279026.1	12	13	14	6	17	13	6	4	5	8	4	5	AC005225.4
ENSG00000273314.1	28	33	28	76	51	58	35	48	29	62	61	63	AC005229.4
ENSG00000263648.1	0	0	0	0	0	0	0	0	0	0	0	1	AC005244.1
ENSG00000268030.1	0	0	0	0	1	0	2	2	1	3	7	8	AC005253.1
ENSG00000256210.3	1	0	1	0	1	0	1	1	1	0	0	0	AC005255.1
ENSG00000267073.1	2	5	1	2	2	1	5	0	2	1	0	0	AC005256.1
ENSG00000286880.1	0	0	0	0	0	0	0	0	0	1	2	0	AC005258.2
ENSG00000268205.1	114	149	144	205	149	189	201	148	132	135	119	183	AC005261.1
ENSG00000268678.1	0	0	0	0	0	0	0	0	1	1	1	0	AC005261.2
ENSG00000268723.1	0	0	0	1	0	1	0	0	0	0	0	3	AC005261.4
ENSG00000267551.3	0	1	0	3	1	0	0	0	0	2	1	0	AC005264.1
ENSG00000251393.4	2	0	0	4	1	0	0	2	3	1	0	0	AC005280.1
ENSG00000284930.1	0	2	2	4	1	1	0	0	1	0	1	2	AC005280.2
ENSG00000285006.1	1	0	3	2	4	4	2	2	0	2	3	0	AC005280.3
ENSG00000266469.2	4	6	7	9	6	2	0	0	1	2	2	2	AC005288.1
ENSG00000233852.1	0	0	0	0	1	0	0	0	0	0	0	0	AC005304.1
ENSG00000265494.1	0	0	0	1	0	0	0	1	2	0	0	0	AC005304.2
ENSG00000266744.1	1	0	0	0	0	0	0	0	0	1	0	0	AC005304.3
ENSG00000267283.1	3	2	7	6	8	8	5	3	2	3	3	2	AC005306.1
ENSG00000251537.4	0	1	5	0	0	5	0	5	22	9	2	12	AC005324.3
ENSG00000255104.8	0	1	0	0	0	1	1	0	2	1	2	7	AC005324.4
ENSG00000248015.7	13	17	18	23	18	17	13	13	7	11	16	6	AC005329.1
ENSG00000280486.2	0	0	0	0	0	0	0	0	2	0	1	0	AC005329.3
ENSG00000265100.1	3	0	0	0	0	0	0	0	0	0	0	1	AC005332.1
ENSG00000267731.1	0	0	1	0	0	0	0	0	0	1	0	0	AC005332.2
ENSG00000274561.1	3	4	2	5	2	6	5	1	1	7	6	3	AC005332.3
ENSG00000274712.1	20	24	17	29	13	20	34	18	16	54	37	40	AC005332.4
ENSG00000277476.1	31	40	35	28	19	29	23	24	26	24	23	28	AC005332.5
ENSG00000278730.1	480	694	635	641	536	566	718	528	435	690	487	513	AC005332.6
ENSG00000267056.2	0	1	0	1	0	0	0	0	0	0	0	2	AC005336.1
ENSG00000268565.1	0	0	0	1	0	0	0	0	0	0	0	0	AC005339.1
ENSG00000203593.3	0	0	0	0	0	0	0	0	0	1	0	0	AC005342.1
ENSG00000248493.1	0	0	0	0	0	0	0	0	0	0	1	0	AC005351.1
ENSG00000277602.1	0	0	0	1	1	0	0	0	0	0	0	0	AC005363.2
ENSG00000276445.1	1	0	0	0	0	5	1	0	3	4	1	2	AC005393.1
ENSG00000287249.1	0	3	4	2	2	1	4	2	3	1	10	6	AC005400.1
ENSG00000241185.2	1	0	0	0	0	0	0	2	0	1	1	1	AC005410.1
ENSG00000266368.1	0	0	0	0	0	0	0	0	0	1	0	0	AC005410.2
ENSG00000259146.4	0	3	0	1	2	4	3	1	1	0	3	0	AC005476.2
ENSG00000259005.1	2	5	6	4	1	7	5	3	16	9	5	3	AC005479.1
ENSG00000270000.1	2	1	1	0	2	1	2	4	3	10	5	1	AC005479.2
ENSG00000258891.1	0	0	0	0	0	0	0	0	0	0	0	1	AC005480.1
ENSG00000267421.6	2	0	1	0	1	1	1	1	0	2	1	0	AC005498.2
ENSG00000269696.2	0	1	0	0	0	0	0	0	0	2	1	0	AC005498.3
ENSG00000258559.2	11	12	13	6	8	8	20	22	21	18	20	26	AC005519.1
ENSG00000258653.3	9	2	0	7	8	2	7	13	5	19	20	6	AC005520.1
ENSG00000259065.2	3	7	3	0	4	1	3	2	2	5	8	4	AC005520.2
ENSG00000273711.2	0	0	2	1	2	1	1	0	2	0	0	0	AC005520.5
ENSG00000268536.1	1	0	0	1	0	0	0	0	0	0	0	1	AC005523.1
ENSG00000269604.1	0	0	1	1	1	1	1	1	1	2	0	2	AC005523.2
ENSG00000253183.1	0	0	0	0	0	0	0	1	0	0	0	0	AC005531.1
ENSG00000230825.2	4	3	4	5	2	3	7	11	7	6	6	8	AC005532.1
ENSG00000244167.1	0	0	0	0	0	0	0	0	0	0	1	0	AC005532.2
ENSG00000224903.2	5	2	0	2	5	0	3	1	1	2	4	3	AC005534.1
ENSG00000279809.1	0	14	15	22	6	16	12	10	4	29	3	0	AC005538.2
ENSG00000235852.1	2	0	0	6	4	4	3	10	2	3	14	7	AC005540.1
ENSG00000266897.1	0	0	0	0	0	1	0	0	0	0	0	0	AC005546.1
ENSG00000214719.13	81	69	116	140	84	80	224	157	119	191	171	199	AC005562.1
ENSG00000240449.1	0	1	0	2	1	0	1	1	0	1	0	0	AC005586.1
ENSG00000261305.2	0	0	0	0	0	1	0	0	0	0	0	0	AC005586.2
ENSG00000279584.1	1	0	0	0	0	0	0	0	1	0	0	0	AC005593.1
ENSG00000261790.2	1	3	2	2	0	0	1	3	0	1	0	0	AC005606.2
ENSG00000269749.1	0	0	0	0	0	0	0	0	3	0	0	0	AC005614.2
ENSG00000272070.1	2	2	1	2	3	6	1	1	1	4	1	2	AC005618.1
ENSG00000288095.1	1	0	0	1	1	1	1	1	0	0	1	0	AC005618.4
ENSG00000283525.1	0	0	0	1	0	0	1	0	0	1	1	0	AC005622.1
ENSG00000261596.2	1	0	0	0	0	0	2	4	2	8	8	8	AC005632.3
ENSG00000287809.1	1	0	0	0	0	1	0	0	3	1	2	0	AC005632.6
ENSG00000262633.2	0	102	103	58	50	0	125	177	152	325	344	297	AC005670.2
ENSG00000262879.6	695	935	869	871	789	809	621	403	379	826	575	662	AC005670.3
ENSG00000261490.1	16	28	16	11	10	10	12	15	12	8	6	11	AC005674.2
ENSG00000272911.1	0	0	0	0	0	0	0	0	0	0	0	1	AC005696.3
ENSG00000277200.1	0	0	0	1	0	0	2	1	0	0	0	0	AC005696.4
ENSG00000249631.6	1	0	0	0	1	0	0	0	0	1	0	0	AC005699.1
ENSG00000267318.1	0	0	0	0	0	0	0	0	1	2	0	3	AC005702.1
ENSG00000267526.1	0	0	0	0	0	0	0	0	0	1	0	0	AC005702.2
ENSG00000274378.1	0	0	0	1	0	0	0	0	0	0	0	0	AC005702.3
ENSG00000265445.1	0	0	0	0	0	0	0	0	0	0	0	1	AC005703.3
ENSG00000279660.1	1	1	3	3	5	1	4	2	1	2	7	2	AC005703.6
ENSG00000262681.2	0	0	0	0	0	0	0	0	1	0	0	0	AC005722.3
ENSG00000258472.8	20	15	8	9	10	12	30	16	13	22	15	21	AC005726.1
ENSG00000264044.1	0	0	0	0	0	1	0	0	0	0	0	0	AC005726.2
ENSG00000264608.1	0	1	0	3	1	0	1	0	0	3	3	3	AC005726.3
ENSG00000261033.1	0	0	0	0	0	1	0	0	0	2	0	0	AC005730.2
ENSG00000266126.1	0	1	0	0	0	0	0	0	0	0	0	2	AC005730.3
ENSG00000262185.3	6	7	3	5	3	5	3	2	1	5	6	6	AC005736.1
ENSG00000226040.3	0	0	0	0	0	0	0	1	0	0	0	0	AC005740.1
ENSG00000271871.1	0	0	1	0	0	0	0	0	1	0	0	1	AC005740.4
ENSG00000266934.1	0	1	0	0	1	0	0	0	0	0	1	1	AC005746.1
ENSG00000273982.1	0	0	0	0	0	0	0	0	0	0	0	1	AC005746.3
ENSG00000287527.1	0	0	0	0	0	0	0	0	2	0	0	0	AC005753.3
ENSG00000268650.3	2	0	0	1	2	1	2	1	2	1	1	1	AC005759.1
ENSG00000266933.2	5	1	1	1	1	0	3	3	0	5	6	3	AC005775.1
ENSG00000268189.2	3	2	2	2	3	1	2	3	3	3	6	6	AC005785.1
ENSG00000279203.1	1	2	1	0	1	1	0	0	0	0	1	0	AC005785.2
ENSG00000267436.1	0	0	0	4	1	2	0	2	0	0	0	3	AC005786.3
ENSG00000267090.1	0	0	0	0	0	0	0	0	0	0	0	1	AC005789.1
ENSG00000274447.1	2	3	1	1	0	0	3	0	0	1	0	0	AC005790.1
ENSG00000265702.2	0	0	0	0	0	0	0	0	0	0	1	0	AC005821.1
ENSG00000235554.1	2	6	8	2	2	8	8	2	5	5	9	5	AC005822.1
ENSG00000265282.1	0	0	0	0	0	1	0	0	0	0	0	0	AC005828.4
ENSG00000261575.2	2	2	0	0	1	0	0	0	0	2	0	0	AC005829.1
ENSG00000262539.1	0	0	1	0	0	0	1	0	0	0	3	0	AC005829.2
ENSG00000256799.1	0	0	0	0	0	0	0	1	0	0	0	0	AC005832.3
ENSG00000272921.1	0	0	0	50	0	0	0	0	0	0	0	0	AC005832.4
ENSG00000255639.3	104	131	129	117	118	146	152	122	99	168	135	205	AC005833.1
ENSG00000261335.1	7	3	2	5	2	4	1	0	0	2	3	2	AC005837.1
ENSG00000267168.1	0	0	0	0	0	0	0	0	2	0	0	0	AC005837.2
ENSG00000274051.1	0	0	0	0	0	0	0	0	0	1	0	0	AC005837.3
ENSG00000266538.1	1	0	0	1	0	0	0	0	2	0	0	1	AC005838.2
ENSG00000279089.1	2	5	4	9	9	10	11	3	3	10	8	13	AC005839.1
ENSG00000213942.3	0	0	1	0	0	1	0	0	0	0	0	0	AC005840.1
ENSG00000256433.3	4	4	1	6	2	1	5	4	4	10	4	10	AC005840.2
ENSG00000256913.1	0	0	1	0	3	0	0	1	0	0	0	0	AC005840.3
ENSG00000276718.1	3	0	1	0	0	1	0	1	1	0	1	0	AC005840.4
ENSG00000258092.1	0	0	0	0	0	1	0	0	0	0	2	0	AC005841.1
ENSG00000255775.1	1	0	0	0	0	1	0	0	1	0	2	0	AC005845.1
ENSG00000205325.3	0	1	0	0	0	0	0	0	0	0	0	0	AC005863.1
ENSG00000250770.3	4	7	11	30	17	18	15	6	10	4	1	4	AC005865.1
ENSG00000287712.1	0	1	1	1	0	4	0	0	0	0	4	0	AC005865.2
ENSG00000267449.1	0	0	1	0	0	0	0	0	0	0	0	0	AC005884.2
ENSG00000266385.1	0	0	0	0	0	0	0	0	0	2	0	0	AC005899.5
ENSG00000274341.1	0	1	4	0	0	0	3	2	0	0	1	0	AC005899.6
ENSG00000278668.1	0	1	0	0	0	0	1	0	0	0	0	1	AC005899.7
ENSG00000279762.3	1	0	1	3	20	12	5	10	8	8	12	8	AC005899.8
ENSG00000287907.1	2	0	0	0	0	0	0	0	0	0	0	0	AC005909.2
ENSG00000278356.1	1	0	0	0	0	1	1	0	0	2	0	0	AC005911.1
ENSG00000227081.5	24	38	65	64	53	59	44	58	59	47	77	62	AC005912.1
ENSG00000275850.1	0	0	0	0	0	1	0	0	0	0	0	0	AC005912.2
ENSG00000267059.2	228	292	336	410	301	330	315	257	204	283	295	280	AC005943.1
ENSG00000267469.1	0	0	0	0	0	1	1	0	0	0	0	1	AC005944.1
ENSG00000267138.1	0	0	0	0	0	0	1	0	0	0	0	0	AC005954.1
ENSG00000287337.1	0	1	0	0	1	0	0	1	0	0	0	0	AC005962.2
ENSG00000283538.3	1	0	1	0	3	2	0	0	1	4	2	4	AC005972.3
ENSG00000266869.2	0	0	0	0	1	0	0	2	1	0	0	0	AC005993.1
ENSG00000177418.2	0	0	0	1	0	0	0	0	1	0	0	0	AC006001.1
ENSG00000226824.7	7	16	7	14	18	21	15	13	6	20	16	20	AC006001.2
ENSG00000229180.7	194	263	250	322	316	285	333	264	212	360	482	499	AC006001.3
ENSG00000275400.1	25	22	30	34	11	18	6	8	20	10	13	47	AC006001.4
ENSG00000236795.1	0	0	0	0	1	0	0	0	0	0	0	0	AC006004.1
ENSG00000286912.1	0	0	0	0	1	0	0	0	0	1	0	0	AC006008.1
ENSG00000244563.1	13	19	0	12	0	0	0	12	19	28	57	45	AC006011.1
ENSG00000226636.1	0	0	0	0	0	0	0	0	0	0	1	0	AC006020.1
ENSG00000224785.1	0	0	0	0	0	0	0	0	0	0	0	1	AC006026.1
ENSG00000272638.1	1	0	0	0	1	1	0	0	1	0	0	0	AC006027.1
ENSG00000231357.1	0	0	0	0	1	0	0	0	0	0	0	0	AC006028.1
ENSG00000264324.1	0	1	0	0	4	4	3	0	4	0	7	8	AC006030.1
ENSG00000272908.1	0	0	0	1	0	0	2	0	0	0	0	0	AC006033.2
ENSG00000233108.1	0	1	0	0	0	0	0	0	0	1	0	0	AC006042.2
ENSG00000233264.2	0	0	0	0	0	0	1	1	0	0	1	1	AC006042.3
ENSG00000234141.1	1	0	0	2	1	0	0	0	0	1	1	2	AC006042.4
ENSG00000261786.1	100	81	53	51	21	35	126	87	61	116	79	66	AC006058.1
ENSG00000271192.1	1	0	3	0	2	0	0	0	0	0	0	0	AC006058.2
ENSG00000272121.1	6	1	6	4	4	3	4	1	0	3	3	2	AC006058.3
ENSG00000230084.6	5	4	3	7	6	2	5	3	2	4	8	3	AC006059.1
ENSG00000280571.2	0	0	0	0	1	1	0	0	1	0	0	0	AC006059.2
ENSG00000287629.1	0	0	0	0	0	0	0	0	0	0	0	1	AC006059.5
ENSG00000287171.1	12	30	28	25	33	41	11	13	10	6	7	11	AC006062.1
ENSG00000247853.2	4	6	4	6	2	6	8	5	3	8	11	6	AC006064.2
ENSG00000255966.1	1	0	1	1	0	1	0	0	0	1	1	0	AC006064.3
ENSG00000269968.1	11	12	30	23	12	28	13	13	24	10	19	22	AC006064.4
ENSG00000276232.1	0	0	1	0	0	0	0	2	0	0	1	0	AC006064.5
ENSG00000285238.2	148	0	0	106	9	65	164	76	0	240	232	623	AC006064.6
ENSG00000279799.1	0	0	2	3	1	1	3	2	0	2	1	2	AC006077.2
ENSG00000263235.1	0	3	0	3	0	1	0	1	0	0	7	2	AC006111.2
ENSG00000266907.1	2	0	0	0	0	0	0	0	0	0	0	1	AC006116.1
ENSG00000267776.1	0	0	0	0	0	0	0	1	0	0	0	0	AC006116.10
ENSG00000285996.1	0	0	1	0	0	1	0	0	0	0	0	0	AC006116.11
ENSG00000267429.1	0	1	0	0	0	0	0	0	0	0	0	0	AC006116.6
ENSG00000267459.1	0	1	0	0	0	0	0	0	0	0	0	0	AC006116.7
ENSG00000267549.6	1	0	0	2	1	0	0	0	1	0	0	1	AC006116.8
ENSG00000267606.1	0	0	0	1	0	0	0	0	0	0	0	0	AC006116.9
ENSG00000213970.4	0	0	0	0	0	0	1	1	0	0	0	0	AC006122.1
ENSG00000279716.1	0	0	0	0	0	0	3	0	0	0	0	0	AC006128.1
ENSG00000287766.1	2	2	1	0	1	0	1	0	0	0	0	1	AC006130.3
ENSG00000223770.5	0	0	1	0	0	0	0	0	0	0	0	0	AC006145.1
ENSG00000243220.1	0	1	0	0	0	0	0	0	0	0	0	2	AC006159.2
ENSG00000249502.3	0	0	0	0	0	0	0	0	0	0	1	0	AC006160.1
ENSG00000286591.1	0	1	0	0	1	0	0	0	1	0	1	1	AC006197.2
ENSG00000238247.2	1	0	5	4	0	2	2	0	0	2	0	0	AC006210.2
ENSG00000266921.2	4	7	6	3	3	3	7	1	0	5	2	1	AC006213.1
ENSG00000267058.1	13	21	33	33	14	19	3	11	8	12	9	6	AC006213.2
ENSG00000267191.2	0	0	0	1	1	1	0	0	0	1	0	0	AC006213.3
ENSG00000277806.1	0	0	0	0	0	0	0	0	0	0	0	1	AC006213.4
ENSG00000278492.1	0	0	0	0	0	0	0	0	1	0	0	0	AC006213.5
ENSG00000278917.1	0	0	1	0	0	0	0	0	0	1	0	0	AC006213.6
ENSG00000286613.1	0	1	0	2	0	0	1	0	1	0	1	0	AC006213.7
ENSG00000287778.1	0	0	0	0	1	0	0	0	0	0	2	0	AC006230.1
ENSG00000272799.1	1	1	0	1	0	1	0	0	0	1	0	0	AC006238.1
ENSG00000274578.1	0	0	1	2	1	8	1	0	2	5	2	2	AC006249.1
ENSG00000243224.1	2	0	0	2	2	2	2	2	3	3	3	2	AC006252.1
ENSG00000243696.5	6	4	3	2	2	3	4	0	5	4	2	1	AC006254.1
ENSG00000272473.1	0	0	0	0	0	0	0	0	0	0	0	1	AC006273.1
ENSG00000246225.7	1	0	3	1	0	1	1	0	0	1	2	0	AC006299.1
ENSG00000206129.4	0	0	0	0	1	0	0	0	1	0	0	0	AC006305.1
ENSG00000232445.2	25	30	17	23	9	14	18	20	10	44	54	59	AC006329.1
ENSG00000280388.1	1	0	0	1	0	0	0	0	0	0	0	0	AC006330.1
ENSG00000272686.1	14	23	9	23	16	23	25	22	23	28	27	27	AC006333.2
ENSG00000236213.2	0	0	0	0	0	0	1	0	1	0	2	1	AC006369.1
ENSG00000233191.2	0	0	0	0	0	0	0	0	1	0	0	0	AC006372.2
ENSG00000234210.1	0	0	0	1	0	0	0	1	0	0	0	0	AC006372.3
ENSG00000278959.1	0	0	1	1	0	0	1	0	0	1	0	0	AC006378.2
ENSG00000262456.1	0	1	0	0	1	0	0	0	0	0	0	0	AC006435.1
ENSG00000263345.1	0	0	1	1	1	3	3	2	6	2	1	2	AC006435.2
ENSG00000265784.1	0	0	0	0	0	0	1	2	0	0	0	0	AC006441.3
ENSG00000275532.1	0	2	0	4	2	0	1	1	0	0	0	0	AC006449.2
ENSG00000277182.1	10	14	7	10	9	11	3	5	4	7	9	8	AC006449.5
ENSG00000277969.1	14	15	13	23	16	32	25	32	29	29	25	34	AC006449.6
ENSG00000279119.1	0	0	0	1	0	0	0	0	0	0	0	0	AC006449.7
ENSG00000285904.1	0	0	0	1	0	0	0	0	0	0	0	0	AC006452.1
ENSG00000283132.1	0	1	1	1	0	1	0	0	0	0	0	0	AC006453.1
ENSG00000283196.2	62	87	64	65	83	59	83	63	67	112	112	93	AC006453.2
ENSG00000284052.1	6	12	6	16	18	15	17	7	17	24	26	18	AC006460.2
ENSG00000273448.1	0	5	0	2	0	0	3	2	1	4	1	1	AC006480.2
ENSG00000272719.1	0	0	0	0	0	0	0	0	0	0	0	1	AC006483.2
ENSG00000268643.1	0	0	2	2	0	0	2	0	4	2	2	7	AC006486.1
ENSG00000279539.1	0	1	3	4	1	4	7	3	3	3	5	3	AC006486.2
ENSG00000249906.1	0	0	0	0	0	0	0	0	0	0	1	0	AC006487.1
ENSG00000261770.1	5	7	6	5	5	6	4	2	2	5	1	3	AC006504.1
ENSG00000267264.1	0	1	0	4	0	0	2	5	0	1	1	0	AC006504.3
ENSG00000267575.7	83	91	78	78	60	55	100	65	59	90	89	84	AC006504.5
ENSG00000281468.1	3	6	4	4	6	5	6	1	2	0	4	3	AC006504.7
ENSG00000224058.2	0	0	0	0	0	0	0	0	0	0	0	1	AC006509.1
ENSG00000255581.1	0	0	0	1	2	0	1	0	0	0	1	0	AC006511.2
ENSG00000279865.1	2	1	0	0	2	0	2	2	3	2	1	0	AC006511.3
ENSG00000284697.1	3	4	0	0	0	0	0	0	0	0	0	0	AC006511.5
ENSG00000288043.1	0	0	1	1	0	0	0	0	0	0	0	0	AC006511.6
ENSG00000256651.1	0	0	0	0	0	0	0	0	0	1	1	0	AC006518.1
ENSG00000256682.2	0	2	0	0	1	0	0	0	0	0	0	0	AC006518.2
ENSG00000261342.1	4	8	6	5	8	11	6	13	14	11	18	12	AC006538.1
ENSG00000267001.1	18	14	25	8	9	16	11	15	14	4	11	14	AC006538.2
ENSG00000286460.1	0	0	0	0	0	0	0	0	0	1	2	0	AC006538.4
ENSG00000279352.1	0	1	0	0	0	1	1	3	1	0	0	0	AC006557.6
ENSG00000269194.1	3	1	0	0	0	0	0	1	0	0	3	0	AC006942.1
ENSG00000269446.2	0	0	0	1	0	2	0	1	0	1	2	0	AC006967.3
ENSG00000230191.1	0	0	1	0	0	0	0	0	0	0	0	0	AC006970.1
ENSG00000218586.3	0	0	0	0	1	0	0	1	0	1	0	2	AC006971.1
ENSG00000235859.5	6	6	9	14	11	9	9	17	8	22	38	26	AC006978.1
ENSG00000281593.1	1	0	0	0	0	0	0	0	0	2	0	0	AC006978.2
ENSG00000279317.2	0	0	0	0	0	0	0	0	0	1	0	0	AC006994.2
ENSG00000213542.3	0	0	2	5	0	1	0	0	2	3	1	0	AC007000.1
ENSG00000274038.1	0	0	0	0	0	1	0	0	0	0	0	0	AC007014.2
ENSG00000273320.1	3	1	1	4	0	5	2	1	2	5	2	2	AC007032.1
ENSG00000230751.1	0	0	0	2	1	0	0	1	0	0	0	0	AC007036.2
ENSG00000251660.1	0	2	1	2	2	5	5	0	0	6	13	8	AC007036.3
ENSG00000286847.1	0	0	0	0	0	1	0	0	1	0	0	0	AC007036.5
ENSG00000229127.2	1	3	1	0	1	1	2	1	3	4	5	1	AC007038.1
ENSG00000272807.1	0	4	1	1	0	0	0	1	1	1	0	0	AC007038.2
ENSG00000228384.4	0	0	0	0	0	0	0	0	0	0	1	0	AC007040.1
ENSG00000258881.6	8	1	0	6	3	1	0	1	1	1	1	4	AC007040.2
ENSG00000235411.1	0	0	0	0	2	0	2	0	4	2	1	0	AC007041.1
ENSG00000213216.2	0	0	0	0	3	1	0	0	1	0	0	0	AC007066.1
ENSG00000261094.2	8	1	2	11	5	1	9	7	1	6	6	9	AC007066.2
ENSG00000213443.2	5	24	20	70	38	51	40	36	41	29	39	52	AC007068.1
ENSG00000285673.1	0	0	0	0	0	1	0	0	0	0	0	0	AC007092.1
ENSG00000263004.2	2	0	3	2	3	1	3	0	0	6	4	1	AC007114.1
ENSG00000250497.1	0	0	0	1	0	0	1	0	1	0	0	0	AC007126.1
ENSG00000283549.1	0	1	0	1	4	0	1	0	0	1	0	0	AC007161.3
ENSG00000230408.3	0	0	0	1	6	1	4	1	0	1	0	1	AC007163.1
ENSG00000242951.1	0	0	4	1	1	0	0	0	1	2	0	0	AC007182.2
ENSG00000279407.1	17	34	23	29	8	27	8	2	3	23	5	10	AC007191.1
ENSG00000268173.3	0	23	20	0	31	7	7	0	32	42	20	7	AC007192.1
ENSG00000269151.1	0	0	0	0	0	1	0	0	0	0	0	0	AC007193.3
ENSG00000261560.1	1	1	2	2	3	3	2	0	0	0	0	1	AC007216.3
ENSG00000263307.1	0	1	0	0	0	0	0	0	0	1	0	0	AC007216.4
ENSG00000263033.2	0	0	0	0	0	0	1	0	0	0	0	0	AC007220.1
ENSG00000279357.1	1	0	0	0	0	0	2	0	0	0	0	0	AC007224.2
ENSG00000260782.1	0	1	0	0	4	1	0	1	0	2	0	1	AC007225.1
ENSG00000267544.1	0	2	2	1	2	0	2	0	2	3	1	0	AC007229.1
ENSG00000231043.3	30	33	30	26	25	27	34	22	25	34	41	45	AC007238.1
ENSG00000285872.1	1	2	0	0	3	1	1	2	4	3	2	4	AC007240.3
ENSG00000223813.3	0	0	3	0	1	0	0	0	0	0	0	0	AC007255.1
ENSG00000213090.2	0	2	2	1	0	4	3	1	4	9	10	5	AC007256.1
ENSG00000284959.2	0	0	0	1	0	1	0	0	2	0	1	0	AC007262.2
ENSG00000230799.1	0	0	1	0	0	0	0	0	0	0	0	0	AC007279.1
ENSG00000287133.1	0	1	0	0	0	0	0	0	1	0	0	0	AC007279.2
ENSG00000227014.6	6	8	4	8	3	3	2	1	4	9	4	3	AC007285.1
ENSG00000267980.1	2	1	2	3	0	1	0	2	1	1	4	0	AC007292.1
ENSG00000269318.1	3	2	0	3	2	3	1	4	3	4	2	9	AC007292.2
ENSG00000269807.1	0	0	0	0	0	0	0	0	1	0	0	0	AC007292.3
ENSG00000234818.1	0	0	0	0	0	0	0	0	0	0	1	0	AC007314.1
ENSG00000172974.11	333	504	404	497	420	472	642	570	550	668	733	742	AC007318.1
ENSG00000273763.2	3	1	4	3	1	4	4	2	1	11	10	6	AC007318.2
ENSG00000224063.6	3	5	3	5	2	8	7	6	4	14	12	13	AC007319.1
ENSG00000283809.1	0	7	0	0	0	2	1	0	2	0	0	0	AC007326.4
ENSG00000284294.1	1	0	0	0	0	0	0	0	0	0	0	0	AC007326.5
ENSG00000261997.1	6	5	0	9	1	4	0	4	2	3	2	7	AC007336.1
ENSG00000279030.1	91	127	126	129	103	101	117	84	101	133	124	122	AC007336.3
ENSG00000279344.1	0	0	1	0	0	0	0	0	3	0	0	0	AC007342.6
ENSG00000279722.1	1	10	8	4	10	4	4	0	2	2	4	3	AC007342.7
ENSG00000225216.6	0	0	0	0	0	0	0	0	0	0	1	0	AC007362.1
ENSG00000231969.2	0	1	1	1	0	0	1	5	1	4	3	2	AC007364.1
ENSG00000226756.1	2	1	0	1	1	1	0	0	0	0	0	2	AC007365.1
ENSG00000227791.3	0	0	0	0	0	0	0	0	0	0	0	1	AC007365.2
ENSG00000255595.5	0	0	0	0	0	0	0	0	0	1	0	0	AC007368.1
ENSG00000250371.1	2	0	0	0	0	0	0	0	0	0	0	0	AC007370.2
ENSG00000273090.1	0	0	0	0	0	0	0	0	1	0	0	0	AC007378.1
ENSG00000228590.2	0	0	0	0	0	0	0	0	0	0	1	0	AC007381.1
ENSG00000159186.4	0	0	0	0	0	0	2	0	0	0	0	0	AC007383.1
ENSG00000227946.1	15	26	21	21	14	13	11	8	6	14	9	12	AC007383.2
ENSG00000237513.2	0	0	0	0	0	0	0	0	1	0	0	0	AC007384.1
ENSG00000227394.1	0	0	0	0	0	1	0	0	0	0	0	0	AC007386.1
ENSG00000224646.2	0	0	1	0	0	0	0	0	0	0	0	0	AC007387.1
ENSG00000287687.1	0	0	0	0	0	0	1	0	0	1	1	0	AC007387.3
ENSG00000204929.13	0	3	2	1	3	3	0	0	1	0	0	0	AC007389.1
ENSG00000281920.1	0	0	0	0	0	0	1	1	0	1	0	1	AC007389.5
ENSG00000272054.1	5	6	5	5	3	3	1	9	1	5	1	2	AC007390.2
ENSG00000285925.1	0	1	0	2	1	0	0	0	1	0	0	0	AC007391.2
ENSG00000287867.1	0	0	0	0	0	0	0	0	0	0	1	0	AC007402.2
ENSG00000234350.5	0	0	0	2	0	0	0	0	0	1	0	0	AC007405.1
ENSG00000235934.2	0	0	0	2	1	0	1	1	0	0	3	0	AC007405.2
ENSG00000239467.6	1	0	3	0	0	0	0	0	0	3	1	0	AC007405.3
ENSG00000256540.1	0	0	0	1	0	0	0	1	1	0	0	1	AC007406.3
ENSG00000261799.1	62	82	72	42	50	47	142	113	107	143	152	181	AC007406.5
ENSG00000235495.1	1	0	0	0	0	0	0	0	0	0	0	0	AC007422.1
ENSG00000271239.1	0	0	0	1	0	2	0	0	0	0	0	0	AC007423.1
ENSG00000280028.1	0	0	0	0	0	0	0	0	0	0	1	0	AC007431.3
ENSG00000266473.1	0	0	2	1	2	1	1	0	1	0	1	0	AC007448.4
ENSG00000285877.1	0	3	2	1	7	2	4	3	0	7	6	8	AC007448.5
ENSG00000278654.1	1	2	2	1	0	0	0	0	1	2	1	4	AC007450.4
ENSG00000279059.1	27	47	13	25	17	17	11	13	14	22	16	21	AC007485.2
ENSG00000280392.1	0	0	0	0	0	1	0	0	0	0	0	0	AC007496.3
ENSG00000275191.1	1	1	1	2	0	0	0	0	1	0	1	0	AC007497.1
ENSG00000286303.1	0	0	0	0	0	0	0	0	0	1	1	0	AC007528.1
ENSG00000283240.1	0	0	0	0	0	0	0	0	0	1	0	1	AC007529.2
ENSG00000260329.1	3	3	6	8	6	1	6	4	4	8	5	11	AC007541.1
ENSG00000277595.1	1	0	0	1	1	0	2	7	7	0	13	9	AC007546.1
ENSG00000213155.4	0	1	0	1	0	0	0	0	0	0	0	0	AC007547.1
ENSG00000256564.1	2	0	0	1	0	0	0	1	0	7	4	2	AC007552.2
ENSG00000238165.1	1	0	0	0	0	0	0	0	0	0	0	0	AC007560.1
ENSG00000244055.2	8	19	13	4	6	9	13	12	14	17	13	19	AC007566.1
ENSG00000257221.4	0	0	0	0	0	0	0	0	0	0	0	1	AC007569.1
ENSG00000255655.1	0	0	0	0	0	0	0	0	0	1	0	0	AC007570.1
ENSG00000279356.1	0	1	1	0	0	0	1	0	0	1	0	1	AC007610.4
ENSG00000260086.3	1	0	2	0	0	0	1	0	1	3	5	4	AC007611.1
ENSG00000262420.3	5	11	7	8	3	8	4	3	5	9	4	1	AC007613.1
ENSG00000255670.1	1	1	0	0	0	0	0	1	0	0	0	0	AC007619.1
ENSG00000242539.2	1	0	0	1	0	0	0	0	2	2	0	1	AC007620.2
ENSG00000272699.1	0	1	0	0	0	0	1	0	0	0	0	0	AC007620.3
ENSG00000240441.1	0	1	1	0	0	1	0	0	3	1	1	0	AC007622.1
ENSG00000258136.2	0	0	0	0	0	0	1	0	0	0	1	1	AC007622.2
ENSG00000256139.2	1	0	0	0	1	0	1	1	0	0	0	0	AC007637.1
ENSG00000263680.2	0	0	1	0	0	1	0	0	0	0	0	0	AC007639.1
ENSG00000286678.1	0	0	0	0	0	0	0	0	0	0	1	0	AC007649.1
ENSG00000286107.1	0	0	0	0	1	0	1	0	0	0	1	0	AC007655.2
ENSG00000273139.1	0	0	0	1	0	0	1	1	0	1	0	0	AC007663.3
ENSG00000273343.1	0	4	1	3	2	5	4	3	3	7	2	1	AC007663.4
ENSG00000236754.5	0	0	0	0	0	1	1	0	2	0	2	0	AC007666.1
ENSG00000267311.1	0	0	0	0	0	0	1	0	0	1	0	0	AC007673.1
ENSG00000270571.2	2	1	0	1	0	0	1	0	0	0	0	0	AC007681.1
ENSG00000224415.1	2	0	1	0	0	0	0	4	0	1	0	2	AC007683.1
ENSG00000273035.1	0	0	0	0	0	0	0	1	0	0	0	1	AC007684.2
ENSG00000243225.2	2	2	3	4	3	0	1	0	0	0	1	1	AC007686.1
ENSG00000273729.1	10	21	23	18	18	12	8	6	6	14	11	10	AC007686.3
ENSG00000285966.1	0	1	0	0	0	0	0	3	0	0	0	0	AC007686.4
ENSG00000241352.3	0	0	1	0	0	0	0	0	0	0	1	0	AC007688.2
ENSG00000261644.2	5	9	2	8	10	11	17	17	18	16	33	25	AC007728.2
ENSG00000233251.8	108	186	152	146	120	111	95	34	34	44	18	33	AC007743.1
ENSG00000271894.1	32	60	50	20	29	30	14	8	0	10	0	4	AC007744.1
ENSG00000236841.8	0	1	1	0	0	0	0	0	0	0	0	0	AC007750.1
ENSG00000267213.4	4	3	5	6	2	6	7	1	3	4	4	5	AC007773.1
ENSG00000267009.6	1	1	1	2	0	3	1	4	1	0	0	1	AC007780.1
ENSG00000268401.2	0	2	0	0	0	0	5	0	1	0	1	1	AC007785.3
ENSG00000267498.2	0	0	0	1	0	1	0	0	0	0	0	0	AC007786.1
ENSG00000276251.1	0	0	0	0	0	0	0	0	0	0	1	0	AC007786.2
ENSG00000279044.1	1	0	0	3	1	1	1	0	0	0	0	2	AC007787.2
ENSG00000260743.1	0	6	11	2	0	0	4	3	1	2	2	3	AC007823.1
ENSG00000269069.1	9	6	9	10	1	12	8	4	5	10	12	17	AC007842.1
ENSG00000287255.1	0	0	0	0	0	0	0	0	0	3	0	0	AC007877.1
ENSG00000281195.1	0	3	2	0	4	7	3	1	4	2	3	1	AC007878.1
ENSG00000225916.1	1	0	0	1	2	0	0	0	0	0	0	0	AC007879.2
ENSG00000234902.6	1	1	0	4	2	4	1	1	1	0	5	8	AC007879.3
ENSG00000240440.1	0	0	0	0	0	1	0	1	0	0	0	0	AC007879.4
ENSG00000286568.1	0	0	0	0	1	0	0	0	0	0	0	0	AC007879.5
ENSG00000272735.1	0	0	0	0	1	0	0	0	0	0	0	0	AC007881.3
ENSG00000261291.1	0	0	0	0	0	0	0	1	0	0	0	0	AC007906.1
ENSG00000277639.2	14	15	14	17	9	23	16	17	11	29	19	19	AC007906.2
ENSG00000263567.1	0	0	0	0	0	0	0	1	0	0	0	0	AC007923.1
ENSG00000265863.1	0	2	0	0	0	0	0	0	0	0	0	0	AC007923.2
ENSG00000266877.1	0	0	0	0	0	0	0	0	1	0	0	0	AC007923.4
ENSG00000259920.1	0	1	0	1	0	0	0	0	0	0	0	0	AC007938.1
ENSG00000270953.1	6	11	8	11	10	6	6	4	3	5	0	1	AC007938.3
ENSG00000276651.1	2	0	0	0	1	1	2	0	0	0	0	0	AC007950.2
ENSG00000230197.6	0	0	1	0	0	0	0	0	0	0	1	0	AC007952.3
ENSG00000262202.4	1	0	0	0	0	0	0	0	1	0	0	3	AC007952.4
ENSG00000262319.1	0	0	0	1	0	0	0	0	0	0	0	0	AC007952.6
ENSG00000225790.2	4	7	2	3	3	10	2	2	1	6	2	6	AC007953.1
ENSG00000233762.3	36	25	35	34	25	33	32	28	29	33	31	42	AC007969.1
ENSG00000183663.6	0	0	0	1	0	0	0	0	0	0	0	1	AC007992.1
ENSG00000271349.1	1	5	2	1	1	1	1	1	0	1	2	2	AC007992.2
ENSG00000277534.1	25	21	24	13	6	15	19	7	7	27	29	35	AC007996.1
ENSG00000267140.1	0	2	0	0	0	0	0	0	0	2	0	3	AC007998.2
ENSG00000267583.5	1	2	0	1	0	2	0	0	0	3	0	0	AC007998.3
ENSG00000275512.1	0	0	0	0	0	0	2	0	0	1	0	0	AC007998.4
ENSG00000257042.1	0	0	0	0	0	1	0	0	1	0	2	1	AC008011.2
ENSG00000285901.1	27	36	23	76	0	35	24	0	0	42	25	12	AC008012.1
ENSG00000257261.6	21	34	32	22	20	41	26	10	14	13	12	9	AC008014.1
ENSG00000239246.3	0	3	4	1	1	6	2	1	2	6	3	6	AC008026.1
ENSG00000272369.1	0	3	4	4	2	3	1	5	1	1	3	1	AC008035.1
ENSG00000283041.1	4514	6232	6150	6189	5559	5873	6118	5231	4897	7051	6767	6640	AC008038.1
ENSG00000239219.2	0	0	0	0	0	0	0	0	0	1	0	1	AC008040.1
ENSG00000242583.1	0	0	0	0	0	1	0	0	0	0	0	0	AC008040.2
ENSG00000286056.1	0	0	0	0	0	0	0	1	0	0	0	0	AC008055.2
ENSG00000230918.2	0	0	0	0	0	0	2	0	0	1	1	0	AC008063.1
ENSG00000233397.3	1	5	0	1	2	2	1	1	0	2	2	0	AC008063.2
ENSG00000276087.2	1	0	0	1	0	1	0	0	0	1	1	1	AC008073.3
ENSG00000260101.1	4	3	4	4	8	8	3	2	0	4	2	3	AC008074.2
ENSG00000173862.3	0	0	0	0	1	0	0	0	0	0	0	0	AC008080.1
ENSG00000257925.1	0	1	0	0	0	0	0	0	0	1	0	0	AC008083.2
ENSG00000233175.2	3	7	10	7	6	5	3	1	0	3	3	1	AC008105.1
ENSG00000233483.3	1	2	1	1	0	1	0	4	0	2	1	1	AC008105.2
ENSG00000267121.6	1	13	9	12	15	7	17	15	15	14	14	15	AC008105.3
ENSG00000275560.1	10	5	3	3	3	3	4	2	6	8	6	0	AC008115.3
ENSG00000275963.1	1	0	2	1	0	1	1	1	0	1	1	1	AC008115.4
ENSG00000287202.1	1	1	0	0	1	0	0	0	0	0	2	0	AC008119.1
ENSG00000274156.1	0	0	0	0	0	0	0	1	0	1	1	0	AC008121.2
ENSG00000273015.2	55	67	61	63	67	77	29	33	23	83	76	67	AC008124.1
ENSG00000258204.1	0	0	1	0	0	1	1	1	0	0	1	0	AC008126.1
ENSG00000257298.1	1	3	1	0	1	3	1	0	0	1	5	0	AC008147.2
ENSG00000287454.1	0	0	0	0	0	0	1	0	3	0	0	4	AC008149.2
ENSG00000233491.8	0	1	0	0	0	0	0	0	0	0	0	1	AC008163.1
ENSG00000237310.2	12	9	9	17	6	5	6	3	1	2	8	4	AC008267.5
ENSG00000235584.3	0	0	0	1	0	1	0	0	0	1	0	0	AC008268.1
ENSG00000229321.2	10	1	10	1	2	1	1	2	0	3	3	3	AC008269.1
ENSG00000272156.1	0	3	1	2	2	0	1	2	1	1	1	2	AC008280.3
ENSG00000245317.2	4	0	3	10	6	11	7	2	7	13	14	17	AC008393.1
ENSG00000285188.1	2	0	0	0	0	6	6	0	7	1	6	13	AC008397.2
ENSG00000268530.6	0	0	3	3	0	3	1	0	0	1	0	0	AC008403.2
ENSG00000287603.1	0	0	0	0	0	0	0	0	0	0	1	0	AC008403.3
ENSG00000251583.1	0	0	0	0	1	0	0	1	0	0	0	0	AC008427.1
ENSG00000204758.8	5	5	2	4	6	12	5	2	0	3	4	3	AC008429.1
ENSG00000253785.1	1	2	3	0	0	1	2	1	1	3	1	0	AC008429.2
ENSG00000254295.1	0	0	0	0	0	0	0	0	1	0	0	0	AC008429.3
ENSG00000249655.1	0	0	0	1	0	0	0	0	0	0	0	0	AC008434.1
ENSG00000249637.2	0	0	0	1	2	1	1	2	1	0	4	5	AC008438.1
ENSG00000232220.2	0	0	0	0	0	2	0	0	0	0	0	0	AC008440.2
ENSG00000233937.7	22	34	30	32	28	29	36	24	8	48	35	22	AC008443.1
ENSG00000247049.2	0	0	0	0	0	0	0	0	1	0	0	0	AC008443.2
ENSG00000248103.1	0	0	1	0	0	0	0	0	0	0	0	0	AC008443.3
ENSG00000248514.1	0	0	1	0	0	0	0	0	0	0	0	0	AC008443.4
ENSG00000250222.2	1	5	2	5	4	3	3	3	0	1	2	1	AC008443.5
ENSG00000250900.6	0	0	0	1	0	0	0	1	0	0	0	0	AC008443.6
ENSG00000286657.1	0	0	0	2	0	0	0	0	0	0	0	0	AC008453.2
ENSG00000286503.1	0	0	0	0	0	0	0	1	0	0	0	0	AC008462.1
ENSG00000249476.2	0	8	3	4	3	4	5	4	5	3	2	1	AC008467.1
ENSG00000213303.3	0	0	1	0	0	0	0	0	1	0	0	0	AC008481.1
ENSG00000213304.3	0	1	0	0	1	1	0	0	1	0	2	0	AC008481.2
ENSG00000243304.3	1	1	0	0	0	0	0	0	0	1	1	0	AC008494.1
ENSG00000271797.1	3	4	3	5	4	5	3	3	1	6	7	2	AC008494.3
ENSG00000276945.1	0	2	1	1	1	0	0	0	0	0	0	3	AC008498.1
ENSG00000266910.2	1	1	1	0	2	1	7	4	0	0	2	1	AC008507.1
ENSG00000287859.1	0	0	0	1	0	1	1	0	0	0	0	0	AC008507.4
ENSG00000253966.1	0	0	0	0	0	0	0	0	0	0	0	2	AC008514.2
ENSG00000279232.2	0	0	0	0	2	0	1	1	2	1	1	3	AC008522.1
ENSG00000286669.1	1	2	2	1	0	2	2	1	2	3	1	1	AC008532.1
ENSG00000279108.1	3	4	5	6	9	3	3	5	6	5	4	7	AC008537.3
ENSG00000197332.9	4	1	2	2	3	0	0	1	0	0	1	0	AC008543.1
ENSG00000234259.3	0	0	0	0	0	0	0	1	0	0	0	0	AC008550.1
ENSG00000271109.2	0	0	1	0	0	0	0	1	0	0	0	0	AC008555.4
ENSG00000280106.1	0	8	1	0	0	0	6	1	2	0	0	0	AC008555.7
ENSG00000287960.1	1	2	3	1	1	0	0	1	1	2	0	1	AC008567.3
ENSG00000229855.9	0	0	1	0	0	0	0	0	0	0	0	0	AC008568.1
ENSG00000267474.1	0	0	0	0	0	0	0	1	0	0	0	1	AC008569.2
ENSG00000250615.1	0	0	0	0	0	0	0	0	0	1	0	0	AC008581.1
ENSG00000285000.1	0	0	0	0	0	0	0	0	0	0	12	6	AC008581.2
ENSG00000248634.1	0	0	0	0	0	0	0	0	0	0	1	0	AC008588.1
ENSG00000251680.6	0	0	0	0	0	0	0	1	0	0	0	0	AC008591.1
ENSG00000250362.1	1	0	0	1	0	3	0	0	0	2	0	0	AC008592.1
ENSG00000251000.1	0	0	0	1	0	0	1	0	1	5	0	0	AC008592.3
ENSG00000272021.1	0	0	0	1	0	0	0	0	0	0	0	1	AC008592.5
ENSG00000271737.1	1	1	2	1	1	1	3	2	0	0	2	3	AC008608.2
ENSG00000248367.1	0	0	0	1	0	1	1	0	1	3	3	0	AC008610.1
ENSG00000275719.1	5	3	4	3	1	5	4	4	5	4	10	3	AC008622.2
ENSG00000249494.6	0	0	0	0	0	0	1	0	0	0	0	1	AC008629.1
ENSG00000253141.2	0	0	3	0	1	0	0	0	0	0	0	0	AC008632.1
ENSG00000269487.1	0	0	0	0	0	0	0	1	0	0	0	0	AC008635.1
ENSG00000254298.1	0	0	0	0	0	0	1	0	0	0	0	0	AC008641.1
ENSG00000253768.1	1	0	0	0	0	0	0	0	0	0	0	1	AC008663.1
ENSG00000253955.2	0	0	0	1	0	0	0	0	0	0	0	0	AC008663.2
ENSG00000248544.2	2	1	3	2	5	3	1	2	1	0	1	4	AC008676.1
ENSG00000285868.1	11	18	7	7	9	12	6	5	3	6	9	6	AC008676.3
ENSG00000213414.3	0	0	0	0	0	0	0	1	0	0	2	0	AC008677.1
ENSG00000253422.1	1	0	0	0	0	0	0	0	0	0	0	0	AC008677.3
ENSG00000267335.2	5	0	7	2	2	0	3	1	3	14	14	3	AC008687.1
ENSG00000268108.1	2	1	0	4	11	5	5	2	1	1	4	3	AC008687.2
ENSG00000268287.1	2	4	3	12	6	6	3	2	3	1	1	0	AC008687.3
ENSG00000268655.2	1	1	0	0	0	1	0	0	1	1	1	1	AC008687.4
ENSG00000268669.1	0	0	0	0	0	0	0	1	0	0	1	0	AC008687.5
ENSG00000269706.1	1	1	1	5	5	3	2	5	3	4	0	2	AC008687.6
ENSG00000283251.1	0	2	1	4	3	3	1	0	0	0	4	3	AC008687.7
ENSG00000283663.1	4	9	3	1	10	3	2	4	6	4	11	9	AC008687.8
ENSG00000249738.10	0	0	0	1	0	0	1	0	0	0	1	0	AC008691.1
ENSG00000253798.2	1	0	0	0	0	0	0	0	0	0	0	0	AC008694.1
ENSG00000254336.1	0	1	0	0	0	2	0	1	1	0	0	3	AC008694.2
ENSG00000286676.1	0	0	0	0	0	0	0	0	1	0	0	0	AC008695.2
ENSG00000225869.4	0	0	0	0	1	0	0	0	0	0	0	0	AC008696.1
ENSG00000269400.1	0	0	0	0	0	0	0	0	0	0	1	0	AC008734.2
ENSG00000267096.1	2	1	2	1	2	0	1	1	0	0	0	3	AC008735.1
ENSG00000276488.1	0	0	0	0	0	0	0	0	0	1	0	0	AC008735.4
ENSG00000267475.1	3	5	1	2	6	4	5	8	2	6	6	10	AC008736.1
ENSG00000268743.1	0	0	0	0	0	0	0	0	1	0	0	0	AC008737.1
ENSG00000273420.1	23	29	31	37	31	29	30	53	28	40	77	73	AC008738.7
ENSG00000257403.2	0	0	0	0	0	0	0	0	0	0	0	2	AC008740.1
ENSG00000271150.1	0	1	0	0	0	0	0	0	0	0	0	0	AC008745.1
ENSG00000267024.1	0	0	0	0	0	1	0	0	0	0	0	0	AC008747.1
ENSG00000255441.1	1	0	0	0	0	0	0	0	0	0	0	0	AC008750.2
ENSG00000267984.1	0	0	0	0	0	0	0	0	0	0	3	0	AC008750.4
ENSG00000268520.1	0	0	0	0	0	0	0	0	1	1	0	0	AC008750.5
ENSG00000269403.1	7	3	1	1	3	3	5	4	3	1	6	1	AC008750.8
ENSG00000267370.1	1	0	3	1	1	4	1	1	0	3	6	1	AC008752.3
ENSG00000238150.1	0	0	0	1	1	0	0	0	0	0	0	0	AC008753.1
ENSG00000196826.7	0	0	0	0	29	0	0	0	12	0	21	0	AC008758.1
ENSG00000248406.1	3	2	1	0	0	0	2	2	1	2	0	0	AC008758.3
ENSG00000269755.1	0	0	1	0	3	0	0	0	0	0	0	0	AC008758.6
ENSG00000276980.1	0	0	1	0	0	1	1	0	0	7	1	1	AC008760.2
ENSG00000268400.5	0	0	0	0	1	0	1	0	0	0	2	0	AC008763.2
ENSG00000141979.4	0	0	0	0	0	0	0	0	0	2	2	0	AC008764.1
ENSG00000268309.1	0	0	0	0	0	1	0	0	0	0	0	0	AC008764.3
ENSG00000268790.5	0	0	2	23	0	0	0	0	0	0	0	4	AC008764.4
ENSG00000269399.2	8	4	5	2	1	4	6	4	3	2	15	8	AC008764.6
ENSG00000269578.1	0	0	0	1	0	0	1	0	0	0	0	0	AC008764.7
ENSG00000279529.1	3	8	13	12	12	8	6	13	3	9	7	8	AC008764.8
ENSG00000279748.1	3	1	2	4	5	2	0	0	0	3	2	1	AC008764.9
ENSG00000286741.1	1	0	3	0	0	0	0	0	1	0	0	3	AC008766.1
ENSG00000267179.1	0	0	4	0	1	1	0	0	1	0	3	0	AC008770.2
ENSG00000267274.1	0	2	0	2	0	0	2	0	0	0	3	0	AC008770.3
ENSG00000286098.1	0	0	0	0	0	0	0	0	0	0	1	0	AC008770.4
ENSG00000249042.6	143	197	179	133	151	137	65	38	26	71	29	39	AC008771.1
ENSG00000249436.2	0	0	0	0	0	0	0	0	1	0	0	0	AC008780.1
ENSG00000287709.1	0	0	0	0	3	0	0	0	0	0	0	0	AC008780.2
ENSG00000286853.1	0	0	0	0	0	0	0	0	0	0	0	2	AC008786.1
ENSG00000286538.1	0	1	0	0	0	0	0	0	0	0	0	0	AC008798.2
ENSG00000254170.1	0	0	1	0	0	0	0	0	0	0	0	0	AC008802.1
ENSG00000250240.6	4	8	2	6	3	5	2	2	2	12	3	2	AC008840.1
ENSG00000260482.3	0	3	0	0	0	0	0	0	0	0	0	0	AC008870.1
ENSG00000260751.2	2	7	5	7	6	5	7	8	6	6	6	16	AC008870.2
ENSG00000271788.1	1	1	0	1	0	0	0	0	0	1	1	0	AC008875.1
ENSG00000287263.1	0	0	0	0	0	2	1	0	3	0	1	1	AC008875.3
ENSG00000268614.1	7	15	8	3	15	3	0	0	3	3	7	4	AC008878.2
ENSG00000268861.7	0	0	0	0	68	0	0	0	0	0	0	0	AC008878.3
ENSG00000269371.1	0	0	0	1	0	0	0	0	0	0	0	0	AC008878.4
ENSG00000286828.1	0	0	0	2	3	1	2	2	1	3	0	4	AC008883.3
ENSG00000269243.1	0	0	0	0	0	0	0	2	1	1	2	0	AC008894.2
ENSG00000279198.1	4	4	14	16	7	6	6	10	7	6	13	9	AC008894.3
ENSG00000279948.1	5	1	2	5	2	2	8	4	3	8	8	6	AC008895.1
ENSG00000271815.1	0	0	0	1	1	1	0	0	0	1	0	1	AC008897.3
ENSG00000248734.2	1	0	0	1	0	0	1	0	1	2	0	0	AC008906.1
ENSG00000272109.2	0	0	0	0	0	0	0	1	1	3	4	2	AC008906.2
ENSG00000262211.1	0	0	0	0	0	1	0	0	1	1	0	0	AC008914.1
ENSG00000259782.2	0	0	0	0	2	0	0	3	0	1	1	0	AC008915.1
ENSG00000260136.6	22	22	21	26	21	19	27	29	12	47	45	38	AC008915.2
ENSG00000271828.1	3	1	0	0	0	0	0	0	0	1	0	2	AC008937.3
ENSG00000260072.1	0	0	0	0	0	1	0	0	0	0	0	0	AC008938.1
ENSG00000272234.1	0	0	1	0	0	0	0	0	0	1	1	0	AC008945.1
ENSG00000267939.1	2	1	0	1	0	0	2	0	0	0	1	0	AC008946.1
ENSG00000250155.2	0	0	0	0	0	0	0	0	1	0	0	0	AC008957.1
ENSG00000247796.3	33	35	33	34	19	30	15	14	13	37	13	25	AC008966.1
ENSG00000286048.1	0	1	3	8	8	8	10	13	5	5	21	12	AC008966.3
ENSG00000176593.8	21	23	15	23	15	23	9	7	9	22	10	18	AC008969.1
ENSG00000271926.1	5	2	0	2	0	2	1	0	2	5	3	4	AC008972.1
ENSG00000272081.1	4	2	2	5	3	1	6	3	2	9	0	3	AC008972.2
ENSG00000268083.5	2	0	0	0	0	0	0	6	5	0	10	3	AC008982.1
ENSG00000269688.1	0	0	2	0	0	0	0	1	1	0	0	1	AC008982.2
ENSG00000267751.5	20	6	10	28	14	11	14	1	7	15	7	9	AC009005.1
ENSG00000196696.12	86	143	116	94	105	104	186	204	137	172	230	237	AC009022.1
ENSG00000274093.1	0	0	0	0	0	0	0	0	0	0	0	1	AC009032.1
ENSG00000260807.7	0	1	0	0	1	1	0	0	0	1	0	5	AC009041.2
ENSG00000276931.1	6	8	8	3	5	2	7	1	2	11	14	12	AC009041.4
ENSG00000214331.8	75	84	59	109	57	75	129	96	98	121	161	154	AC009053.1
ENSG00000261079.1	4	4	7	4	5	6	6	5	8	6	10	5	AC009053.2
ENSG00000261783.1	0	1	2	4	1	4	8	5	6	6	0	1	AC009054.2
ENSG00000247228.3	0	0	0	0	0	1	0	0	0	1	0	0	AC009060.1
ENSG00000270049.3	6	10	9	6	7	8	3	3	3	2	2	3	AC009061.2
ENSG00000259780.3	1	1	0	2	2	3	1	2	0	4	11	4	AC009065.1
ENSG00000259933.6	0	0	0	0	0	1	0	0	0	0	0	0	AC009065.2
ENSG00000260447.1	0	0	0	1	0	1	0	0	0	0	0	1	AC009065.3
ENSG00000260778.5	4	8	4	2	2	3	3	3	2	9	5	10	AC009065.4
ENSG00000261123.1	2	0	1	5	3	1	1	1	1	1	2	2	AC009065.5
ENSG00000261240.1	1	0	0	1	0	1	0	0	0	1	1	2	AC009065.6
ENSG00000261532.1	0	0	0	0	1	0	1	0	0	0	0	0	AC009065.7
ENSG00000261663.1	1	0	0	1	1	3	3	2	0	0	0	0	AC009065.8
ENSG00000286221.1	0	1	2	1	1	1	6	3	1	6	2	0	AC009070.1
ENSG00000280152.1	15	27	24	23	31	41	32	15	11	22	26	24	AC009078.3
ENSG00000280416.1	0	0	0	0	0	0	0	0	0	0	1	0	AC009084.3
ENSG00000279583.1	0	0	0	0	0	1	1	1	2	0	6	11	AC009086.2
ENSG00000260060.1	0	1	0	0	1	0	0	0	0	1	2	0	AC009088.1
ENSG00000263343.1	0	1	0	0	0	0	0	0	0	0	0	0	AC009088.4
ENSG00000260038.1	0	0	0	0	0	0	0	0	0	0	1	2	AC009090.1
ENSG00000279019.1	1	0	0	0	0	0	0	0	0	1	0	0	AC009090.4
ENSG00000279803.1	0	3	2	3	3	4	2	4	1	5	5	4	AC009090.5
ENSG00000284685.1	0	0	0	0	0	0	0	0	0	0	1	0	AC009093.10
ENSG00000260953.1	0	1	0	4	1	4	2	2	4	0	0	3	AC009093.4
ENSG00000277999.1	1	0	0	3	1	1	1	0	0	1	0	2	AC009093.6
ENSG00000284649.1	3	1	0	0	1	0	1	0	1	1	0	0	AC009093.8
ENSG00000284671.1	0	0	1	5	5	2	1	0	0	1	6	3	AC009093.9
ENSG00000261278.1	0	0	0	0	0	0	1	0	0	0	0	2	AC009094.1
ENSG00000261513.1	2	0	0	0	1	0	0	0	0	0	4	2	AC009097.4
ENSG00000272372.1	0	0	0	0	0	0	0	1	0	0	0	0	AC009102.2
ENSG00000260927.2	2	3	4	2	3	6	0	1	3	1	1	0	AC009107.2
ENSG00000270020.1	0	0	3	4	6	2	2	5	2	2	2	0	AC009108.3
ENSG00000279142.1	0	0	0	1	0	0	0	1	0	2	0	1	AC009108.4
ENSG00000280278.1	1	0	0	2	0	0	1	0	0	1	0	2	AC009108.5
ENSG00000259877.2	21	25	23	35	26	34	23	10	9	40	30	39	AC009113.1
ENSG00000260659.1	0	0	0	1	0	0	0	0	0	0	0	0	AC009113.2
ENSG00000276131.1	2	0	1	3	3	2	3	1	4	11	9	7	AC009118.2
ENSG00000276259.1	5	6	1	2	4	0	3	9	5	5	4	2	AC009118.3
ENSG00000260228.6	0	3	1	0	0	0	0	0	0	0	2	0	AC009119.1
ENSG00000239763.2	1	0	1	1	1	0	4	2	0	1	3	1	AC009120.1
ENSG00000259972.3	19	36	13	23	22	18	19	14	15	37	33	33	AC009120.2
ENSG00000275236.1	0	0	0	0	1	0	3	1	1	0	2	1	AC009120.5
ENSG00000263080.1	0	0	0	1	0	0	0	0	0	0	0	0	AC009121.3
ENSG00000247121.7	19	7	8	19	5	5	20	3	4	21	18	9	AC009126.1
ENSG00000238045.9	10	7	14	13	12	8	10	14	4	13	12	6	AC009133.1
ENSG00000259952.1	0	1	0	0	1	1	3	0	2	6	1	2	AC009133.2
ENSG00000275857.1	0	2	2	0	2	2	0	1	0	2	1	0	AC009133.4
ENSG00000280893.1	155	136	132	201	59	109	142	96	66	130	97	118	AC009133.6
ENSG00000266801.1	0	0	0	0	0	0	0	0	0	1	0	0	AC009137.2
ENSG00000260922.2	0	0	0	0	0	0	0	1	0	2	0	0	AC009139.1
ENSG00000260495.1	0	4	2	0	0	0	0	1	0	0	1	1	AC009148.1
ENSG00000261161.1	0	1	1	0	0	0	0	0	0	0	0	0	AC009154.1
ENSG00000274478.1	1	0	0	0	0	1	0	0	0	0	0	0	AC009154.2
ENSG00000260092.1	0	2	0	0	0	0	0	1	0	1	0	1	AC009163.3
ENSG00000261717.5	0	2	0	4	4	4	2	2	0	3	10	3	AC009163.5
ENSG00000274220.1	2	1	6	0	2	2	1	2	1	3	1	2	AC009163.7
ENSG00000263105.1	2	0	0	0	0	1	1	0	0	0	0	0	AC009171.2
ENSG00000239254.1	0	0	0	1	0	0	0	0	0	0	0	0	AC009220.2
ENSG00000223725.6	1	2	0	1	0	1	2	1	1	1	0	2	AC009226.1
ENSG00000224675.1	0	0	2	0	0	1	1	0	5	1	2	0	AC009227.1
ENSG00000242628.6	0	3	1	0	0	0	1	0	0	0	0	0	AC009228.1
ENSG00000280276.1	0	0	0	1	0	0	0	0	0	0	0	0	AC009229.4
ENSG00000286519.1	4	2	2	0	2	3	0	2	0	2	1	0	AC009236.1
ENSG00000286728.1	0	0	0	0	0	0	0	0	0	1	0	0	AC009236.2
ENSG00000272913.1	8	8	12	34	21	16	10	6	3	18	22	27	AC009237.14
ENSG00000273305.1	2	2	1	0	2	4	0	0	0	2	0	0	AC009237.15
ENSG00000274028.1	0	0	0	0	0	0	0	0	0	0	1	0	AC009237.16
ENSG00000229689.3	20	23	16	29	19	12	22	9	13	33	28	25	AC009237.3
ENSG00000235959.1	16	10	2	23	0	26	10	9	4	5	4	4	AC009237.6
ENSG00000236750.1	1	2	0	1	0	0	0	0	0	1	0	0	AC009237.9
ENSG00000227120.1	0	0	2	0	16	0	0	0	4	5	4	4	AC009238.1
ENSG00000233275.1	0	0	0	0	1	1	1	1	0	2	0	0	AC009238.2
ENSG00000283031.2	0	0	0	0	0	0	1	0	0	0	0	0	AC009242.1
ENSG00000238072.1	23	29	35	27	21	21	30	20	31	30	43	31	AC009244.1
ENSG00000230383.1	11	4	14	14	8	15	4	8	9	9	13	22	AC009245.1
ENSG00000236212.2	0	0	0	0	0	0	0	0	0	0	3	0	AC009262.1
ENSG00000234352.9	0	0	0	0	1	0	0	0	0	0	0	0	AC009264.1
ENSG00000278472.1	0	2	2	1	1	0	2	2	2	1	3	0	AC009268.2
ENSG00000259744.1	0	0	0	3	1	2	0	1	0	0	1	0	AC009269.4
ENSG00000267327.2	0	0	0	0	1	0	0	0	0	0	0	0	AC009271.1
ENSG00000273297.2	0	0	1	0	0	1	0	0	0	0	1	0	AC009275.1
ENSG00000273576.1	14	15	15	14	9	8	29	14	12	11	17	23	AC009283.1
ENSG00000232320.6	94	160	151	160	129	140	138	128	131	92	160	102	AC009299.2
ENSG00000233868.1	11	8	7	14	9	9	17	13	14	15	24	23	AC009302.1
ENSG00000224967.1	0	0	0	0	0	0	0	0	0	0	0	1	AC009303.1
ENSG00000279227.1	8	12	8	24	13	18	11	23	6	32	24	22	AC009303.4
ENSG00000273080.1	2	0	3	2	3	6	4	1	2	0	2	1	AC009309.1
ENSG00000238207.2	0	0	0	0	0	0	0	0	0	0	1	0	AC009312.1
ENSG00000286797.1	0	0	0	0	0	0	0	0	0	0	1	0	AC009315.1
ENSG00000257176.3	4	13	11	8	3	7	11	9	6	22	25	34	AC009318.1
ENSG00000273680.1	13	20	14	13	10	11	5	6	2	8	3	9	AC009318.2
ENSG00000274315.1	3	3	5	3	4	7	5	0	1	2	4	3	AC009318.3
ENSG00000275476.1	0	4	0	0	0	0	0	0	2	0	1	0	AC009318.4
ENSG00000216895.9	21	20	16	21	13	11	17	11	11	12	16	12	AC009403.1
ENSG00000283128.2	0	0	0	0	0	0	2	1	1	1	1	4	AC009403.2
ENSG00000236255.2	11	11	9	7	9	7	6	4	7	5	3	10	AC009404.1
ENSG00000286075.1	168	275	286	305	250	320	61	254	0	314	361	404	AC009412.1
ENSG00000236533.1	0	0	0	0	1	0	0	0	0	0	0	0	AC009413.1
ENSG00000253880.1	0	0	0	0	0	0	0	0	0	0	0	1	AC009435.1
ENSG00000286427.1	3	2	1	0	3	1	1	0	0	3	0	1	AC009486.2
ENSG00000226121.2	88	87	83	94	49	93	147	126	143	170	264	247	AC009487.2
ENSG00000286247.1	0	0	0	0	0	0	0	1	0	0	0	0	AC009494.2
ENSG00000229195.1	0	0	0	0	0	0	0	2	0	1	0	0	AC009495.1
ENSG00000232411.1	0	0	0	0	0	0	1	0	1	1	2	0	AC009495.2
ENSG00000235192.1	1	0	0	0	0	0	0	0	0	0	0	0	AC009495.3
ENSG00000224152.1	27	33	42	38	32	34	18	13	15	30	24	21	AC009506.1
ENSG00000256377.6	0	1	0	0	0	0	0	0	0	0	0	0	AC009509.1
ENSG00000276261.1	1	4	0	5	1	0	4	2	2	0	1	1	AC009509.4
ENSG00000256747.1	0	0	0	0	0	0	0	0	0	0	0	1	AC009511.2
ENSG00000111788.10	51	33	30	44	28	29	39	8	16	36	10	25	AC009533.1
ENSG00000276067.2	1	0	0	0	0	0	0	0	1	0	0	0	AC009542.2
ENSG00000270607.1	84	106	117	395	317	372	390	402	278	384	359	299	AC009549.1
ENSG00000272986.1	0	0	0	1	0	2	0	1	1	0	0	3	AC009570.1
ENSG00000253100.2	0	0	0	0	0	0	0	0	0	0	0	1	AC009623.1
ENSG00000253133.2	1	1	0	2	2	2	2	3	2	2	0	1	AC009630.1
ENSG00000253174.2	0	0	0	0	1	0	0	0	0	0	0	0	AC009630.2
ENSG00000264578.1	0	0	0	0	0	0	1	1	0	1	0	0	AC009630.3
ENSG00000287535.1	0	0	0	1	1	0	0	0	0	0	0	0	AC009630.4
ENSG00000287201.1	0	0	0	0	1	0	0	0	0	0	0	0	AC009682.1
ENSG00000272264.1	0	0	0	0	0	0	1	0	0	0	0	2	AC009686.2
ENSG00000260729.1	10	2	7	8	10	7	20	6	24	16	9	24	AC009690.1
ENSG00000261460.1	0	0	2	0	0	0	0	0	0	0	0	0	AC009690.2
ENSG00000273025.1	0	0	6	0	0	0	0	0	0	0	0	0	AC009690.3
ENSG00000264340.1	0	0	0	0	0	0	0	0	0	1	0	0	AC009704.1
ENSG00000276934.1	0	0	0	0	0	0	0	1	0	1	0	0	AC009704.2
ENSG00000280205.1	0	0	0	1	0	0	0	0	0	0	0	0	AC009716.2
ENSG00000257281.1	0	1	0	0	0	1	0	0	0	0	0	0	AC009729.1
ENSG00000287229.1	3	0	7	2	2	2	2	5	0	5	6	4	AC009731.1
ENSG00000258056.2	32	39	45	44	59	47	32	30	32	58	93	68	AC009779.2
ENSG00000258311.5	73	98	68	60	81	72	25	23	12	36	35	25	AC009779.3
ENSG00000283667.1	1	5	1	2	4	4	1	0	0	2	0	0	AC009802.1
ENSG00000254847.1	0	0	0	1	0	0	0	0	0	0	0	0	AC009806.1
ENSG00000251867.4	2	4	3	5	3	4	5	4	4	2	4	1	AC009812.1
ENSG00000260317.1	0	0	1	0	2	0	1	0	1	0	0	1	AC009812.4
ENSG00000263823.1	9	13	16	38	38	32	30	36	23	32	27	30	AC009831.1
ENSG00000285655.1	0	0	0	0	0	0	0	0	0	0	1	0	AC009879.2
ENSG00000285791.1	0	8	0	2	2	6	0	0	0	1	0	0	AC009879.3
ENSG00000254027.1	6	5	3	7	2	6	0	4	1	11	4	11	AC009902.2
ENSG00000272425.1	2	2	0	3	2	2	2	1	1	1	3	7	AC009902.3
ENSG00000250031.1	0	0	0	0	1	0	0	0	0	0	0	0	AC009927.1
ENSG00000238082.1	0	0	2	0	0	1	1	0	4	0	0	1	AC009948.1
ENSG00000270277.1	1	6	6	4	2	1	4	2	3	2	7	4	AC009948.2
ENSG00000270956.1	4	5	2	10	3	4	2	2	4	2	3	3	AC009948.3
ENSG00000279598.1	1	0	0	0	0	0	0	0	0	1	1	1	AC009948.4
ENSG00000279964.1	0	0	0	0	0	0	0	0	0	0	1	0	AC009949.1
ENSG00000225963.8	2	5	1	0	2	3	0	0	1	0	1	1	AC009950.1
ENSG00000279166.1	0	0	0	0	0	0	0	0	0	1	0	0	AC009951.4
ENSG00000287115.1	4	1	1	5	4	1	3	1	0	4	4	2	AC009951.6
ENSG00000267919.1	0	0	0	0	3	0	0	0	0	0	3	0	AC009955.2
ENSG00000268896.1	0	0	0	0	0	2	0	0	0	0	1	0	AC009955.3
ENSG00000269068.1	0	0	0	0	0	0	0	0	1	0	1	0	AC009955.4
ENSG00000226266.6	0	6	2	9	1	2	1	6	5	1	2	6	AC009961.1
ENSG00000287091.1	5	6	4	4	2	2	1	4	0	6	3	4	AC009961.4
ENSG00000260742.1	3	4	2	0	1	1	2	1	1	6	1	7	AC009962.1
ENSG00000272555.1	0	0	0	0	0	0	0	0	0	0	2	0	AC009974.1
ENSG00000259659.1	0	0	0	0	0	0	0	0	0	1	0	1	AC009996.1
ENSG00000234597.2	0	0	0	1	0	0	0	0	0	0	1	0	AC010096.1
ENSG00000256646.7	187	193	197	187	101	168	270	162	122	235	185	231	AC010132.3
ENSG00000261019.1	0	1	0	0	0	1	1	0	0	2	0	2	AC010132.4
ENSG00000223923.2	0	3	0	0	2	2	0	1	0	2	2	1	AC010136.1
ENSG00000269391.2	0	0	2	0	0	0	0	0	0	0	0	0	AC010139.1
ENSG00000261324.2	0	0	1	0	2	0	2	1	2	4	2	0	AC010168.2
ENSG00000258101.2	4	2	5	11	1	2	3	6	3	4	4	8	AC010173.1
ENSG00000257611.1	1	0	0	0	0	0	0	0	0	0	0	0	AC010182.1
ENSG00000256442.2	0	0	0	0	2	0	0	0	0	0	0	0	AC010186.1
ENSG00000256594.8	42	51	35	112	75	110	149	87	66	127	81	74	AC010186.2
ENSG00000257027.1	16	13	20	45	37	52	41	38	32	36	36	37	AC010186.3
ENSG00000285854.1	0	2	0	0	0	0	0	0	0	0	0	1	AC010197.2
ENSG00000246331.2	0	0	3	1	2	4	0	1	0	0	0	0	AC010198.1
ENSG00000285517.1	369	574	487	648	638	724	473	546	389	665	795	798	AC010198.2
ENSG00000257803.2	0	0	0	2	0	0	0	0	0	0	0	0	AC010200.1
ENSG00000271259.1	1	0	1	0	0	0	0	0	0	0	0	0	AC010201.1
ENSG00000271327.1	4	0	0	1	0	3	1	1	0	0	3	3	AC010201.2
ENSG00000286608.1	0	0	0	0	1	0	0	0	0	0	0	0	AC010201.3
ENSG00000257489.6	1	0	0	1	0	0	0	0	0	0	0	0	AC010203.1
ENSG00000260633.1	0	0	0	0	0	1	0	0	0	0	1	0	AC010207.1
ENSG00000250608.2	1	0	2	5	5	5	4	2	2	6	2	0	AC010210.1
ENSG00000249249.2	5	7	2	7	5	3	6	3	2	3	4	3	AC010226.1
ENSG00000235253.1	0	0	0	0	0	0	0	0	0	0	0	1	AC010240.2
ENSG00000272040.1	2	4	1	0	1	5	1	4	2	3	1	0	AC010245.2
ENSG00000254887.1	0	0	2	0	0	0	0	0	0	1	0	0	AC010247.1
ENSG00000259436.1	0	0	0	0	0	0	0	0	3	1	1	1	AC010247.2
ENSG00000247311.3	0	0	0	4	2	5	1	1	0	1	3	0	AC010255.1
ENSG00000250803.6	0	0	0	1	0	0	0	1	0	0	1	0	AC010255.3
ENSG00000248664.1	0	0	0	0	0	0	0	1	0	0	0	0	AC010273.2
ENSG00000253213.1	0	0	0	1	0	0	0	0	0	1	1	0	AC010306.1
ENSG00000248245.1	0	0	0	1	0	0	0	0	0	0	0	0	AC010307.2
ENSG00000269053.1	0	0	0	0	0	0	0	0	0	0	1	0	AC010319.3
ENSG00000267927.1	0	0	0	0	0	0	1	1	1	2	0	0	AC010320.1
ENSG00000167774.2	106	37	30	86	53	7	32	97	7	72	16	14	AC010323.1
ENSG00000261341.6	0	0	0	0	0	0	0	0	0	1	0	0	AC010325.1
ENSG00000270804.1	24	28	26	20	18	22	36	29	15	32	27	30	AC010326.4
ENSG00000267110.1	0	0	0	0	0	0	0	1	0	0	0	0	AC010327.2
ENSG00000267577.1	6	3	3	3	2	2	7	2	1	3	2	1	AC010327.4
ENSG00000276570.1	25	38	21	32	31	14	41	23	25	30	18	26	AC010327.6
ENSG00000286230.1	1	3	1	0	4	1	1	0	0	3	0	0	AC010327.7
ENSG00000287170.1	2	0	0	0	1	0	1	5	0	2	4	1	AC010327.8
ENSG00000268282.1	0	0	0	0	0	0	0	1	1	0	0	1	AC010328.2
ENSG00000277383.1	2	1	0	2	0	3	1	0	0	2	0	4	AC010331.1
ENSG00000280121.1	0	0	0	0	1	2	0	0	0	0	0	0	AC010335.3
ENSG00000214248.2	0	0	0	1	1	1	0	1	5	5	2	1	AC010336.1
ENSG00000260500.1	0	1	0	0	0	0	0	0	0	0	0	0	AC010336.2
ENSG00000268149.1	0	0	0	0	0	0	1	2	0	1	0	0	AC010336.4
ENSG00000269139.2	0	0	0	1	1	2	0	2	3	1	0	2	AC010336.5
ENSG00000286138.1	0	1	0	0	0	0	0	0	0	0	0	0	AC010336.8
ENSG00000226432.3	5	3	1	7	0	0	2	0	1	4	3	2	AC010342.1
ENSG00000240376.1	2	1	1	2	0	2	2	2	5	1	6	7	AC010343.1
ENSG00000250697.2	5	10	9	5	9	10	3	3	5	6	10	11	AC010343.3
ENSG00000269961.1	0	0	2	1	0	1	2	1	0	2	2	0	AC010359.2
ENSG00000286314.1	0	2	0	0	0	0	0	0	0	0	0	0	AC010359.3
ENSG00000226400.2	0	0	0	0	0	1	0	0	0	0	0	0	AC010385.1
ENSG00000248428.1	0	0	0	0	0	1	0	0	0	0	0	0	AC010395.1
ENSG00000213663.4	0	0	0	0	0	1	0	0	0	0	0	0	AC010409.1
ENSG00000250895.1	0	0	0	0	0	0	0	0	1	0	0	0	AC010409.2
ENSG00000268945.1	0	0	0	2	1	0	0	0	0	0	2	2	AC010422.2
ENSG00000269242.1	20	25	60	87	24	65	34	28	72	17	28	58	AC010422.3
ENSG00000269693.1	38	0	0	54	13	28	0	0	0	83	0	0	AC010422.6
ENSG00000285583.1	0	2	0	1	0	0	0	0	0	2	2	1	AC010422.7
ENSG00000285589.1	62	96	55	63	63	65	97	64	69	92	122	112	AC010422.8
ENSG00000279557.1	1	2	3	1	0	0	0	0	0	0	1	2	AC010435.1
ENSG00000188242.4	88	104	96	93	50	70	49	68	45	124	109	118	AC010442.1
ENSG00000214278.4	0	0	0	1	0	0	0	0	0	0	0	0	AC010442.2
ENSG00000250645.1	0	0	0	1	0	1	0	0	0	0	1	1	AC010442.3
ENSG00000251257.2	4	2	5	2	2	1	2	1	0	1	0	1	AC010457.1
ENSG00000250332.1	0	0	1	0	0	0	0	0	1	1	1	0	AC010460.3
ENSG00000269307.1	0	0	0	4	0	0	0	4	0	0	0	0	AC010463.1
ENSG00000269815.1	1	1	0	0	0	0	1	0	0	0	0	0	AC010463.3
ENSG00000214784.4	24	26	39	33	29	50	33	25	43	16	34	33	AC010468.1
ENSG00000268225.2	0	2	1	0	2	3	0	1	1	0	0	0	AC010487.1
ENSG00000269646.1	0	0	0	0	0	1	0	0	0	0	0	0	AC010487.2
ENSG00000261360.1	0	4	0	0	0	4	3	3	2	4	6	2	AC010491.1
ENSG00000286970.1	0	0	0	0	0	0	0	0	0	0	1	1	AC010491.2
ENSG00000271714.1	1	2	1	3	2	3	2	5	5	0	0	1	AC010501.2
ENSG00000267219.1	0	3	1	0	0	0	1	0	1	1	0	1	AC010504.1
ENSG00000282339.1	0	4	0	0	0	3	0	0	0	0	0	9	AC010507.2
ENSG00000268750.7	8	15	16	22	19	8	22	5	6	14	23	10	AC010522.1
ENSG00000131152.4	3	0	0	0	0	11	0	0	0	0	6	0	AC010531.1
ENSG00000261697.5	0	0	0	0	0	0	0	0	0	0	0	1	AC010531.4
ENSG00000270006.2	2	1	1	6	0	2	1	0	0	0	1	0	AC010531.6
ENSG00000226180.3	9	11	10	10	4	6	6	4	12	5	24	25	AC010536.1
ENSG00000277504.1	0	0	0	0	1	1	0	0	0	0	0	0	AC010536.3
ENSG00000275734.2	15	18	19	29	16	12	18	25	13	18	16	25	AC010538.1
ENSG00000260650.1	1	0	3	2	1	3	1	1	0	1	1	0	AC010542.1
ENSG00000261519.3	1	1	0	2	4	2	1	1	0	0	2	2	AC010542.4
ENSG00000277978.1	0	1	0	0	0	0	0	1	0	0	0	1	AC010542.5
ENSG00000247324.2	0	0	0	0	0	0	0	0	1	0	0	0	AC010547.1
ENSG00000261611.6	0	0	9	6	11	41	0	3	0	0	3	3	AC010547.4
ENSG00000267992.1	0	0	0	0	0	0	0	0	0	1	0	0	AC010605.1
ENSG00000213976.4	9	1	2	2	0	0	4	1	7	5	0	1	AC010615.1
ENSG00000269439.6	12	3	8	20	7	5	10	4	9	14	14	14	AC010618.3
ENSG00000269469.1	0	0	0	0	0	0	0	2	1	0	1	0	AC010619.1
ENSG00000273189.1	0	7	4	3	1	0	2	7	3	0	4	4	AC010619.2
ENSG00000204666.3	0	0	0	1	0	0	0	0	0	0	1	0	AC010624.1
ENSG00000269110.1	0	1	0	0	0	1	0	0	0	0	0	0	AC010636.2
ENSG00000283103.3	83	97	116	98	97	76	104	91	83	104	102	121	AC010642.2
ENSG00000279592.1	0	0	0	0	0	0	0	1	0	0	0	2	AC010653.2
ENSG00000283057.1	1	0	0	0	2	0	0	0	0	0	1	0	AC010653.3
ENSG00000277369.1	0	1	1	2	1	1	3	3	1	2	7	7	AC010654.1
ENSG00000228700.1	0	1	0	0	0	0	0	0	0	0	0	0	AC010655.1
ENSG00000240758.2	0	0	1	0	0	0	0	0	0	0	0	1	AC010655.2
ENSG00000272601.1	1	4	0	0	2	1	1	0	2	1	2	0	AC010655.3
ENSG00000273184.1	4	11	0	0	7	0	0	24	0	19	7	0	AC010655.4
ENSG00000232383.1	0	0	0	0	0	0	0	0	1	0	0	0	AC010677.1
ENSG00000267784.1	0	0	0	0	0	0	0	1	0	0	0	0	AC010680.1
ENSG00000270574.1	10	11	13	12	9	6	5	10	5	17	12	13	AC010680.2
ENSG00000271011.1	5	3	1	2	0	7	7	3	0	3	7	4	AC010680.3
ENSG00000271141.1	0	1	0	0	0	1	0	0	0	1	0	2	AC010680.4
ENSG00000242540.3	2	0	1	0	1	0	0	0	0	1	0	1	AC010729.2
ENSG00000232713.2	0	0	0	0	2	0	1	3	0	0	0	1	AC010733.1
ENSG00000267520.2	0	15	9	130	228	239	104	126	111	65	142	78	AC010733.2
ENSG00000261379.1	0	0	1	0	0	1	1	0	0	0	0	0	AC010735.1
ENSG00000272622.2	0	1	2	5	1	1	4	2	0	3	1	3	AC010735.2
ENSG00000228876.4	0	0	0	0	0	1	0	0	0	0	0	1	AC010745.2
ENSG00000265752.3	0	0	0	0	0	0	0	0	0	1	1	0	AC010754.1
ENSG00000264577.1	1	0	0	0	1	0	0	1	0	0	0	1	AC010761.1
ENSG00000265073.1	0	0	0	0	0	0	1	0	0	0	0	2	AC010761.2
ENSG00000267774.2	5	6	4	5	3	1	3	3	0	7	12	11	AC010776.2
ENSG00000273664.1	1	0	0	0	0	0	0	0	0	2	1	0	AC010776.3
ENSG00000286489.1	0	0	1	0	0	0	0	0	0	0	0	0	AC010789.2
ENSG00000259287.2	3	5	8	4	2	5	4	1	8	9	13	10	AC010809.1
ENSG00000259408.2	4	4	3	6	5	8	6	7	11	18	6	7	AC010809.2
ENSG00000276702.1	0	0	0	0	0	0	0	0	0	0	1	0	AC010809.3
ENSG00000253848.1	0	0	0	0	0	1	0	0	0	0	0	0	AC010834.2
ENSG00000253854.1	0	1	0	0	0	0	0	0	0	0	0	0	AC010834.3
ENSG00000273008.1	2	3	4	2	0	1	6	3	1	6	6	2	AC010864.1
ENSG00000280390.1	0	0	0	0	0	0	1	0	0	0	0	0	AC010872.1
ENSG00000225402.1	0	0	0	1	0	1	1	0	0	0	1	1	AC010878.1
ENSG00000234936.1	0	0	0	5	1	0	0	0	0	5	1	1	AC010883.1
ENSG00000287387.1	1	0	0	5	0	0	1	0	0	1	2	2	AC010883.3
ENSG00000226853.3	0	2	3	3	1	5	2	2	1	4	3	0	AC010894.2
ENSG00000286707.1	9	13	10	14	15	8	9	5	3	11	2	8	AC010896.1
ENSG00000232479.2	0	3	0	0	1	0	1	0	0	1	1	4	AC010900.1
ENSG00000272702.1	2	4	5	9	6	3	4	2	1	8	4	3	AC010913.1
ENSG00000248540.3	0	0	0	5	3	1	0	5	1	4	9	8	AC010931.2
ENSG00000228033.6	0	1	1	0	0	0	0	0	0	3	1	1	AC010967.1
ENSG00000269973.1	62	59	66	39	27	31	50	44	51	46	41	46	AC010969.2
ENSG00000244151.1	0	1	1	3	0	2	5	3	4	3	5	8	AC010973.2
ENSG00000230065.1	0	0	0	0	0	0	2	0	0	1	0	0	AC010974.1
ENSG00000286068.1	0	0	2	0	0	0	0	0	0	0	0	0	AC010974.2
ENSG00000272789.1	0	0	1	0	0	2	0	0	0	0	0	0	AC010976.2
ENSG00000287016.1	1	3	1	0	1	1	0	0	0	5	0	1	AC010996.1
ENSG00000272692.2	1	0	0	3	0	0	0	1	0	2	0	1	AC010997.4
ENSG00000275343.1	0	0	0	0	0	0	0	2	0	0	0	0	AC010999.1
ENSG00000230626.4	1	5	4	4	1	3	2	6	8	8	6	2	AC011005.1
ENSG00000253695.2	0	0	0	0	0	2	0	0	0	0	2	0	AC011008.1
ENSG00000280294.1	1	2	0	1	0	0	0	0	0	0	0	0	AC011008.2
ENSG00000286561.1	0	0	0	1	1	1	0	0	0	0	0	0	AC011092.3
ENSG00000279526.1	0	0	0	0	0	0	0	1	0	0	0	0	AC011239.2
ENSG00000272180.1	0	0	0	0	0	0	0	1	0	0	0	0	AC011306.1
ENSG00000257642.1	0	5	2	5	2	2	1	0	0	0	0	1	AC011313.1
ENSG00000287688.1	0	1	1	1	1	0	2	0	2	0	0	0	AC011317.1
ENSG00000286017.1	1	1	1	3	0	0	0	1	0	0	1	0	AC011322.1
ENSG00000249839.1	33	67	59	53	32	62	52	30	29	25	35	9	AC011330.1
ENSG00000275601.1	2	7	3	6	6	4	2	0	1	1	0	0	AC011330.2
ENSG00000284772.1	0	0	0	0	0	0	2	0	1	0	0	0	AC011330.3
ENSG00000271795.1	1	1	2	0	1	2	1	1	2	1	0	0	AC011337.1
ENSG00000247199.5	4	3	6	1	3	3	7	6	0	0	0	2	AC011346.1
ENSG00000248362.1	1	3	0	0	3	4	0	1	0	1	2	0	AC011352.1
ENSG00000254042.2	1	2	0	1	0	0	0	0	0	6	2	0	AC011365.1
ENSG00000287630.1	0	0	0	0	0	1	0	0	0	0	0	0	AC011370.1
ENSG00000272112.1	1	2	2	0	0	2	2	1	0	0	0	0	AC011374.2
ENSG00000254363.6	0	0	0	0	0	0	0	0	0	1	0	0	AC011379.2
ENSG00000249593.6	0	0	0	0	0	0	0	1	0	0	0	0	AC011405.1
ENSG00000249363.1	0	1	1	2	0	0	0	0	0	0	0	0	AC011411.1
ENSG00000250956.1	1	0	1	0	0	0	0	0	0	0	0	0	AC011416.2
ENSG00000283897.2	0	1	0	0	0	0	0	0	0	1	0	0	AC011416.3
ENSG00000266983.1	0	0	2	0	1	0	0	0	0	0	0	0	AC011444.1
ENSG00000268262.1	7	2	3	5	2	0	1	1	4	3	5	0	AC011445.1
ENSG00000269246.1	0	1	0	0	0	0	0	0	0	0	0	0	AC011445.2
ENSG00000267598.1	0	0	3	7	1	6	0	5	2	0	5	2	AC011446.2
ENSG00000287296.1	0	0	0	0	1	0	0	0	1	0	0	0	AC011446.3
ENSG00000224864.4	2	1	2	4	0	3	2	0	3	2	1	0	AC011447.1
ENSG00000267383.7	0	0	0	1	0	0	0	1	0	0	0	1	AC011447.3
ENSG00000258674.5	5	4	3	1	6	5	5	6	5	8	17	13	AC011448.1
ENSG00000197813.6	4	0	2	2	2	3	0	1	1	4	7	3	AC011450.1
ENSG00000283108.1	0	2	0	0	0	0	0	0	0	0	0	0	AC011451.3
ENSG00000287275.1	0	1	0	0	0	0	0	0	0	0	0	0	AC011451.4
ENSG00000269842.5	0	0	0	1	0	0	0	1	0	0	0	0	AC011453.1
ENSG00000267197.1	0	0	1	2	0	0	0	0	0	0	0	0	AC011461.1
ENSG00000255730.5	1	0	1	4	0	3	4	4	0	2	5	0	AC011462.1
ENSG00000277744.1	0	0	1	0	0	1	1	0	0	1	0	0	AC011462.4
ENSG00000286177.1	92	130	125	78	87	89	138	181	137	208	193	214	AC011462.5
ENSG00000268583.2	4	3	1	1	0	4	2	3	3	4	1	3	AC011466.1
ENSG00000280353.1	1	0	0	1	1	1	0	0	0	0	0	0	AC011466.4
ENSG00000260160.1	2	1	3	0	0	0	1	0	1	0	1	2	AC011468.1
ENSG00000267827.5	0	4	1	5	1	1	0	16	0	6	6	1	AC011468.2
ENSG00000270248.1	1	0	0	0	0	0	0	0	2	1	0	0	AC011468.4
ENSG00000275055.1	1	0	2	5	1	5	0	0	1	0	4	4	AC011468.5
ENSG00000267082.1	2	0	0	1	0	0	2	1	0	2	0	0	AC011472.1
ENSG00000273733.1	1	0	0	2	1	1	0	0	0	2	0	0	AC011472.4
ENSG00000243494.1	0	0	0	0	0	1	0	0	0	0	0	0	AC011476.1
ENSG00000267419.2	1	4	1	0	2	2	1	2	1	1	2	2	AC011477.1
ENSG00000267481.1	0	0	2	0	0	1	0	0	1	1	0	0	AC011477.2
ENSG00000286080.1	0	0	0	0	1	0	0	0	0	0	0	0	AC011477.8
ENSG00000267748.4	1	0	0	0	1	1	0	0	0	0	1	0	AC011479.1
ENSG00000268499.1	0	0	0	0	0	0	0	0	0	0	1	0	AC011479.2
ENSG00000269653.1	1	0	0	1	2	0	1	1	0	0	1	0	AC011479.3
ENSG00000286037.1	0	0	0	0	0	0	0	0	2	0	0	0	AC011479.4
ENSG00000267282.1	0	0	0	0	0	0	2	0	0	0	0	0	AC011481.2
ENSG00000280087.1	0	0	0	0	1	0	0	0	0	0	2	0	AC011481.3
ENSG00000213777.5	0	0	0	1	0	2	1	0	1	1	3	1	AC011487.1
ENSG00000269444.1	1	0	0	0	0	0	0	0	1	0	0	0	AC011491.2
ENSG00000243829.1	0	1	1	0	1	4	1	0	1	0	1	0	AC011495.1
ENSG00000269374.1	13	18	28	58	46	57	31	46	47	39	56	68	AC011497.2
ENSG00000267030.1	1	1	0	0	0	0	0	0	1	0	0	2	AC011498.2
ENSG00000280239.1	11	8	2	14	2	5	5	2	2	7	0	10	AC011498.7
ENSG00000267157.1	0	0	0	3	0	4	0	2	0	0	0	0	AC011499.1
ENSG00000242411.2	0	0	0	0	1	0	1	0	0	0	0	0	AC011506.1
ENSG00000287254.1	0	0	0	0	1	0	0	0	0	0	0	0	AC011509.3
ENSG00000167807.15	10	12	16	21	13	12	22	21	27	7	17	8	AC011511.1
ENSG00000267105.1	0	0	0	0	0	1	0	0	0	1	0	0	AC011511.3
ENSG00000267303.1	79	0	0	0	60	74	20	50	0	74	113	157	AC011511.4
ENSG00000267607.1	0	0	0	0	0	1	0	0	0	0	0	1	AC011511.5
ENSG00000261400.1	0	0	0	0	0	0	0	0	0	0	1	0	AC011525.1
ENSG00000268434.5	1	0	2	2	0	0	0	3	1	1	5	3	AC011530.1
ENSG00000279753.1	0	0	0	4	0	3	0	0	0	0	0	0	AC011558.1
ENSG00000283376.1	0	0	0	0	0	0	0	0	0	0	1	0	AC011591.2
ENSG00000257515.1	0	0	0	0	0	0	0	0	0	1	0	0	AC011601.1
ENSG00000258017.2	5	3	11	9	1	13	7	17	9	2	7	7	AC011603.2
ENSG00000257046.5	0	0	0	3	0	0	0	0	0	0	0	4	AC011604.2
ENSG00000257453.1	0	0	1	2	1	2	2	8	7	5	6	9	AC011611.3
ENSG00000257839.1	0	0	1	0	0	0	0	0	0	0	0	1	AC011611.4
ENSG00000253307.1	1	0	0	0	0	1	0	2	0	0	2	1	AC011676.1
ENSG00000280035.1	0	0	0	0	1	0	0	0	0	0	0	0	AC011676.5
ENSG00000274895.1	0	0	0	1	0	0	0	0	0	0	0	0	AC011700.1
ENSG00000266495.1	0	0	2	0	1	0	0	0	1	0	1	0	AC011731.1
ENSG00000260493.1	0	0	0	0	0	0	0	0	0	1	0	0	AC011773.4
ENSG00000268573.1	16	10	7	10	6	7	11	8	4	16	6	6	AC011815.1
ENSG00000274184.1	1	0	2	0	0	0	1	0	0	0	0	1	AC011815.2
ENSG00000279989.1	0	0	0	0	0	0	0	0	0	0	1	0	AC011815.3
ENSG00000272334.1	0	0	0	0	0	0	0	0	1	1	0	0	AC011816.2
ENSG00000214917.3	0	0	0	1	0	0	0	0	0	0	0	0	AC011825.1
ENSG00000263917.1	0	0	0	0	0	0	0	2	0	0	0	0	AC011825.3
ENSG00000265008.1	3	0	0	0	0	0	0	0	0	0	0	0	AC011825.4
ENSG00000279431.1	1	0	0	0	0	0	0	0	0	0	0	0	AC011840.5
ENSG00000181511.5	0	0	0	0	0	0	0	0	0	0	0	1	AC011890.1
ENSG00000226806.1	11	12	13	19	14	18	4	2	2	3	4	5	AC011893.1
ENSG00000279145.2	5	7	10	4	2	12	1	4	2	9	3	4	AC011912.1
ENSG00000259349.2	0	0	1	1	0	0	1	0	1	1	1	1	AC011921.1
ENSG00000270553.1	0	0	1	0	0	0	0	0	0	0	0	0	AC011921.3
ENSG00000228007.1	0	0	1	2	0	2	0	1	1	0	0	0	AC011933.1
ENSG00000259924.1	0	0	0	1	0	2	1	0	0	0	1	0	AC011939.1
ENSG00000275638.1	2	0	0	1	0	0	0	0	0	0	0	0	AC011939.3
ENSG00000253555.1	0	0	0	0	0	0	1	0	0	0	0	1	AC011978.1
ENSG00000261542.1	0	1	3	0	0	6	2	6	6	1	2	5	AC011978.2
ENSG00000239470.3	1	1	1	1	0	0	0	1	1	1	0	0	AC011979.1
ENSG00000279277.2	0	2	0	1	0	1	2	0	1	2	2	0	AC012020.1
ENSG00000227252.2	8	14	20	8	13	12	5	2	0	14	0	7	AC012063.1
ENSG00000233416.1	3	1	0	0	0	0	0	0	0	1	0	0	AC012065.2
ENSG00000269976.1	1	0	0	0	2	0	2	3	3	2	7	7	AC012065.3
ENSG00000270100.1	1	0	0	0	0	0	0	0	0	1	0	1	AC012065.4
ENSG00000279307.2	24	25	26	31	25	23	29	32	30	44	31	33	AC012065.5
ENSG00000213197.3	0	0	0	0	0	0	0	1	0	0	1	1	AC012066.1
ENSG00000271936.1	14	14	9	21	7	10	20	6	11	12	9	10	AC012073.1
ENSG00000235072.2	0	0	0	0	3	0	0	1	0	0	1	0	AC012074.1
ENSG00000186076.5	2217	2796	2935	2773	1962	2137	2496	2000	1728	2424	2501	2015	AC012085.1
ENSG00000259773.1	0	0	0	0	0	0	0	0	0	0	1	0	AC012100.2
ENSG00000234327.8	12	10	14	10	7	11	11	3	9	11	7	10	AC012146.1
ENSG00000275278.1	0	0	0	0	2	0	0	0	0	0	0	0	AC012150.2
ENSG00000243024.6	2	1	2	3	1	0	2	1	2	0	3	4	AC012158.1
ENSG00000256192.1	0	0	0	1	0	0	0	0	0	0	0	0	AC012158.2
ENSG00000259298.1	0	0	0	0	0	0	0	0	0	0	0	1	AC012170.2
ENSG00000260350.1	0	1	0	0	0	0	0	0	0	0	0	0	AC012173.1
ENSG00000260071.2	0	0	1	0	0	0	0	0	0	0	0	0	AC012178.1
ENSG00000261114.1	4	4	1	9	9	8	10	3	1	8	7	5	AC012181.1
ENSG00000261270.1	0	0	1	6	6	6	4	5	4	2	3	3	AC012181.2
ENSG00000260111.1	0	1	0	0	1	0	0	2	0	0	2	0	AC012184.1
ENSG00000260537.2	0	0	0	0	0	18	104	12	0	0	0	0	AC012184.2
ENSG00000261777.6	3	5	1	0	1	3	4	2	3	6	4	0	AC012184.3
ENSG00000285710.1	0	0	1	1	0	0	1	0	3	0	0	2	AC012184.4
ENSG00000253477.5	0	0	2	0	0	0	2	3	1	2	1	1	AC012213.1
ENSG00000261670.1	0	0	0	0	1	0	1	0	0	0	1	0	AC012213.2
ENSG00000271830.1	0	1	0	0	1	2	0	0	1	1	0	1	AC012213.4
ENSG00000285982.1	4	0	0	0	0	0	0	0	0	0	0	0	AC012213.5
ENSG00000267228.7	24	31	52	38	30	50	33	47	30	53	39	42	AC012254.2
ENSG00000259415.1	0	0	0	0	0	0	1	0	0	0	0	0	AC012291.2
ENSG00000285667.1	0	0	0	2	0	0	0	0	0	2	1	0	AC012291.3
ENSG00000272667.1	13	21	21	30	25	42	30	25	35	37	50	50	AC012306.2
ENSG00000286873.1	2	8	3	12	5	9	10	11	8	15	10	16	AC012306.3
ENSG00000235742.1	0	0	0	0	0	0	0	0	0	1	0	0	AC012308.1
ENSG00000267360.6	0	0	0	0	0	0	0	1	0	0	0	0	AC012309.1
ENSG00000232098.3	165	182	160	140	120	126	100	87	85	233	200	233	AC012313.1
ENSG00000279611.1	4	5	6	10	7	11	4	1	2	7	3	5	AC012313.10
ENSG00000268049.1	24	42	43	46	36	48	59	61	52	40	41	50	AC012313.2
ENSG00000268230.5	0	3	2	1	3	1	0	0	0	1	1	0	AC012313.3
ENSG00000268543.1	1	7	4	2	4	2	3	1	4	10	5	2	AC012313.4
ENSG00000268912.1	8	5	6	11	15	8	5	15	9	9	22	15	AC012313.5
ENSG00000269054.2	1	2	1	0	2	1	1	1	0	0	2	2	AC012313.6
ENSG00000269106.1	0	0	2	0	0	0	0	0	0	0	0	0	AC012313.7
ENSG00000269473.1	4	13	9	6	4	4	4	2	4	11	9	5	AC012313.8
ENSG00000273901.1	1	0	0	1	0	0	0	0	0	0	0	0	AC012313.9
ENSG00000260772.1	59	64	68	48	60	51	115	85	46	66	58	82	AC012321.1
ENSG00000254079.1	0	0	3	0	0	0	0	0	0	0	0	0	AC012339.2
ENSG00000225156.2	48	113	92	59	91	46	50	39	48	95	100	125	AC012354.1
ENSG00000278957.1	2	0	0	0	0	0	0	0	0	3	0	0	AC012354.10
ENSG00000231848.1	0	0	0	0	0	0	0	0	0	0	0	1	AC012354.2
ENSG00000203327.2	2	2	1	1	0	1	0	1	0	0	0	1	AC012358.1
ENSG00000240401.9	0	0	1	1	0	0	0	0	0	0	0	1	AC012358.3
ENSG00000235319.1	0	0	0	2	0	0	0	0	1	0	0	1	AC012360.1
ENSG00000272861.1	0	0	0	0	0	0	0	0	0	0	2	0	AC012360.2
ENSG00000272994.1	16	6	10	19	8	9	18	9	9	15	7	19	AC012360.3
ENSG00000232693.2	0	0	0	0	0	0	0	0	0	0	1	1	AC012370.1
ENSG00000234255.9	0	0	0	0	0	0	0	1	0	0	1	0	AC012370.2
ENSG00000285805.1	0	1	3	3	1	2	0	0	2	4	3	3	AC012378.2
ENSG00000277135.1	0	0	0	0	0	0	0	0	0	0	0	1	AC012409.3
ENSG00000280048.1	0	0	1	0	0	2	0	0	0	0	0	0	AC012409.5
ENSG00000260103.2	0	0	0	0	1	0	0	0	0	1	2	2	AC012435.2
ENSG00000227080.2	0	0	0	0	0	0	0	0	0	0	1	0	AC012441.1
ENSG00000228897.1	0	0	0	0	0	0	1	0	0	0	0	0	AC012441.2
ENSG00000286207.1	0	1	2	3	2	3	4	12	7	9	15	7	AC012443.2
ENSG00000265451.1	4	3	1	4	2	4	2	1	1	1	3	6	AC012447.1
ENSG00000287299.1	2	1	1	1	1	3	1	3	0	1	3	5	AC012459.1
ENSG00000225166.2	1	1	0	0	2	0	2	1	1	0	2	1	AC012462.1
ENSG00000257283.1	0	0	0	0	0	0	0	0	0	1	0	0	AC012464.1
ENSG00000258303.1	0	0	1	0	0	0	2	0	0	3	0	0	AC012464.2
ENSG00000271976.1	55	87	81	52	24	56	64	52	42	74	50	74	AC012467.2
ENSG00000285587.1	0	0	0	0	0	0	0	1	1	0	0	0	AC012470.1
ENSG00000225057.2	0	0	2	2	0	2	2	1	4	3	0	0	AC012485.1
ENSG00000286165.1	2	0	0	0	0	0	3	0	0	0	0	0	AC012488.2
ENSG00000238029.1	0	0	1	0	0	0	0	0	0	0	0	0	AC012493.1
ENSG00000242575.1	0	0	0	0	0	0	1	1	0	1	0	0	AC012501.3
ENSG00000223634.1	0	0	0	0	0	0	0	0	0	0	1	0	AC012506.2
ENSG00000235497.5	0	0	1	0	0	0	0	0	0	0	0	0	AC012506.4
ENSG00000230385.1	0	0	0	0	2	0	1	0	0	1	0	0	AC012507.1
ENSG00000260163.1	0	0	0	0	0	0	0	0	0	1	0	0	AC012508.1
ENSG00000260634.1	0	0	0	0	0	0	0	0	0	1	0	0	AC012508.2
ENSG00000273466.1	10	21	12	9	8	15	17	26	14	23	26	27	AC012510.1
ENSG00000272564.1	0	0	0	0	2	0	0	0	0	0	0	1	AC012511.1
ENSG00000279348.1	96	154	117	99	93	93	61	39	40	65	72	87	AC012513.3
ENSG00000257327.1	2	1	1	4	2	0	0	0	0	4	1	0	AC012555.1
ENSG00000271843.1	4	4	3	1	4	1	0	0	3	1	0	0	AC012557.1
ENSG00000267293.1	2	0	0	0	1	0	1	0	1	0	3	2	AC012569.1
ENSG00000254002.2	0	3	0	1	1	1	1	1	0	0	1	0	AC012574.2
ENSG00000271849.1	0	0	0	2	4	1	1	1	0	1	2	5	AC012603.1
ENSG00000261526.2	18	10	11	11	3	5	22	16	19	27	14	13	AC012615.1
ENSG00000267007.1	1	0	0	1	0	0	0	0	0	0	0	0	AC012615.2
ENSG00000267125.2	0	0	0	0	0	0	0	1	0	0	0	1	AC012615.3
ENSG00000267244.5	0	0	0	0	0	0	1	0	0	1	0	1	AC012615.6
ENSG00000213293.4	0	0	0	0	0	0	0	0	0	0	2	0	AC012618.1
ENSG00000234773.7	2	2	3	0	0	2	1	2	3	1	1	1	AC012618.3
ENSG00000251361.1	0	2	4	3	1	1	0	1	0	2	0	0	AC012625.1
ENSG00000272324.5	0	0	0	0	0	1	1	0	0	0	1	1	AC012629.2
ENSG00000249825.6	0	0	1	0	0	1	2	0	0	0	1	0	AC012636.1
ENSG00000248968.1	0	0	0	1	0	0	1	1	0	0	3	0	AC012640.1
ENSG00000259802.1	4	7	5	9	8	7	8	3	3	13	9	5	AC012640.2
ENSG00000271980.1	0	2	1	1	0	0	1	0	0	0	1	0	AC012640.4
ENSG00000250616.2	5	2	4	7	5	2	3	0	3	7	7	2	AC012645.1
ENSG00000258461.5	12	10	12	7	9	6	5	1	10	9	12	9	AC012651.1
ENSG00000237525.7	0	1	1	1	0	0	0	0	0	1	0	0	AC012668.3
ENSG00000285870.1	1	1	0	0	0	0	1	0	0	3	0	1	AC012673.1
ENSG00000262712.1	5	10	6	2	8	17	5	20	10	15	51	48	AC012676.1
ENSG00000275515.1	0	0	0	0	0	0	0	0	0	0	1	0	AC012676.2
ENSG00000277170.1	0	0	0	0	1	0	0	1	0	0	0	1	AC012676.3
ENSG00000280063.1	11	8	10	9	8	5	11	2	4	11	15	14	AC012676.5
ENSG00000235721.1	0	0	0	0	0	1	2	0	0	2	0	0	AC013268.3
ENSG00000235480.1	0	0	1	0	0	0	0	0	0	0	0	0	AC013270.1
ENSG00000284337.1	0	0	0	0	0	1	0	0	0	0	0	1	AC013271.1
ENSG00000260036.1	1	0	1	0	1	0	0	0	0	0	0	0	AC013355.1
ENSG00000244251.1	0	0	0	0	0	0	1	0	0	0	0	0	AC013356.1
ENSG00000259211.1	0	0	0	0	0	0	0	0	1	0	0	0	AC013356.2
ENSG00000279765.3	0	6	9	8	2	9	20	12	1	13	22	24	AC013394.1
ENSG00000272148.1	0	3	2	1	0	2	2	0	0	0	0	4	AC013403.2
ENSG00000274365.1	0	0	0	0	1	0	0	0	0	0	0	0	AC013412.1
ENSG00000258976.1	7	16	23	15	19	19	4	9	4	14	13	14	AC013451.2
ENSG00000273240.1	0	0	0	0	0	0	1	0	0	0	0	0	AC013468.1
ENSG00000236048.2	0	0	1	0	0	0	0	0	0	0	0	0	AC013470.3
ENSG00000205500.8	0	0	0	0	0	0	0	0	0	1	0	2	AC013472.1
ENSG00000272056.1	0	1	1	2	0	0	1	0	1	5	3	3	AC013472.3
ENSG00000287543.1	0	0	1	0	0	0	0	0	0	0	0	0	AC013486.1
ENSG00000173867.10	15	4	0	10	22	12	6	3	0	21	12	35	AC013489.1
ENSG00000278737.1	0	0	0	1	0	0	1	1	1	1	2	0	AC013553.4
ENSG00000260123.2	2	0	0	0	1	1	0	1	2	1	1	2	AC013565.1
ENSG00000261407.2	0	0	0	0	0	0	0	0	1	0	1	0	AC013565.3
ENSG00000253875.2	0	0	0	1	0	0	0	0	0	0	3	0	AC013643.2
ENSG00000253139.1	0	0	0	1	0	0	0	0	0	0	0	3	AC013644.1
ENSG00000259345.7	4	10	7	6	10	16	4	7	4	5	5	5	AC013652.1
ENSG00000287788.1	0	0	0	3	0	0	0	0	0	0	1	0	AC013701.2
ENSG00000285542.1	10	3	0	11	3	0	9	1	7	7	5	0	AC013717.1
ENSG00000251459.2	0	0	0	1	0	0	0	0	0	0	0	0	AC013724.1
ENSG00000259793.1	0	0	0	0	0	0	0	0	0	1	0	0	AC013726.1
ENSG00000270557.1	0	0	0	2	1	1	1	1	0	6	1	1	AC013731.1
ENSG00000259341.2	3	2	1	4	2	3	1	2	1	1	0	1	AC015660.1
ENSG00000274294.1	0	0	0	1	0	0	0	1	0	0	0	0	AC015660.3
ENSG00000264558.1	0	0	0	0	0	0	0	0	0	0	1	0	AC015674.1
ENSG00000285579.1	0	0	0	0	0	0	0	0	0	0	0	1	AC015687.1
ENSG00000266728.5	0	0	0	0	1	0	0	0	0	0	0	0	AC015688.4
ENSG00000266872.1	0	2	1	0	0	0	0	0	0	0	0	0	AC015688.6
ENSG00000255387.1	0	0	0	0	0	1	0	0	0	0	0	0	AC015689.1
ENSG00000232386.9	4	0	0	1	2	2	0	0	0	1	3	2	AC015712.1
ENSG00000259583.3	18	11	23	19	18	14	26	18	4	16	21	20	AC015712.2
ENSG00000272808.4	0	0	0	1	0	0	0	0	0	0	0	1	AC015712.6
ENSG00000278456.1	0	1	1	1	1	0	0	0	0	0	1	0	AC015712.7
ENSG00000270091.1	1	1	1	3	2	0	2	0	0	1	3	3	AC015726.1
ENSG00000279432.1	0	1	0	0	0	0	0	0	1	0	0	0	AC015799.1
ENSG00000267546.2	1	0	0	0	0	1	1	2	0	0	0	0	AC015802.4
ENSG00000284526.1	1	0	1	1	0	0	6	0	1	2	1	0	AC015802.6
ENSG00000264112.1	68	67	65	28	14	13	67	52	40	51	34	54	AC015813.1
ENSG00000266086.3	19	33	7	7	3	9	15	39	39	21	58	51	AC015813.2
ENSG00000266290.1	0	0	0	1	0	0	0	0	0	0	0	0	AC015813.3
ENSG00000278642.1	0	1	0	0	0	0	0	0	0	0	0	0	AC015813.4
ENSG00000279069.1	13	30	21	26	13	19	16	7	4	30	27	22	AC015813.5
ENSG00000279207.1	82	100	84	79	59	56	92	105	112	119	142	164	AC015813.6
ENSG00000287751.1	0	2	0	0	2	0	0	1	0	2	0	0	AC015818.10
ENSG00000260907.1	0	0	0	1	0	2	0	1	0	1	1	0	AC015818.2
ENSG00000265916.1	0	0	0	0	0	0	0	0	0	0	0	2	AC015818.5
ENSG00000287490.1	2	2	0	1	0	1	0	0	1	4	1	1	AC015818.9
ENSG00000273669.1	1	0	0	1	0	0	1	0	0	0	1	0	AC015819.1
ENSG00000278607.1	0	0	0	0	0	0	0	0	1	0	0	0	AC015819.2
ENSG00000270240.2	0	0	0	0	0	0	0	0	0	0	1	0	AC015849.1
ENSG00000270829.1	0	0	0	0	1	1	0	0	0	0	0	0	AC015849.2
ENSG00000270977.2	2	0	0	4	0	0	0	0	0	0	0	2	AC015849.5
ENSG00000271268.1	0	1	1	1	0	1	0	1	1	1	1	1	AC015849.6
ENSG00000180953.11	27	25	23	27	32	24	40	36	32	44	42	47	AC015871.1
ENSG00000278600.1	15	19	12	24	15	17	25	14	18	16	8	17	AC015871.4
ENSG00000286813.1	1	1	1	2	0	1	2	0	1	0	0	1	AC015871.7
ENSG00000249406.3	19	21	17	11	27	26	14	13	9	11	4	13	AC015909.1
ENSG00000253730.1	0	1	0	0	0	0	0	0	0	1	0	1	AC015909.2
ENSG00000261959.1	0	0	0	0	1	0	0	2	1	0	1	1	AC015909.3
ENSG00000263176.1	0	0	2	0	0	1	0	0	0	0	0	0	AC015909.4
ENSG00000279792.1	3	3	6	1	1	3	2	2	1	0	3	1	AC015909.5
ENSG00000267312.1	2	0	1	2	2	0	0	2	1	0	0	0	AC015911.4
ENSG00000267369.1	0	0	0	0	0	0	0	0	1	0	0	1	AC015911.7
ENSG00000274213.1	1	1	2	0	2	2	4	2	3	10	3	4	AC015912.3
ENSG00000265254.1	0	0	0	1	0	0	0	0	0	0	1	1	AC015917.2
ENSG00000262884.1	1	3	2	0	1	0	0	0	0	0	1	1	AC015921.1
ENSG00000276855.1	16	23	17	11	13	24	37	22	21	44	38	36	AC015922.3
ENSG00000267334.1	0	0	1	0	0	0	0	0	0	0	0	0	AC015936.1
ENSG00000267707.2	0	0	1	0	0	0	0	0	0	2	0	0	AC015961.2
ENSG00000272606.1	1	2	2	1	1	2	3	0	2	6	3	1	AC015982.2
ENSG00000224746.2	0	2	0	1	0	1	0	1	0	0	1	0	AC015987.1
ENSG00000093100.13	7	29	5	21	34	10	28	26	0	20	23	26	AC016026.1
ENSG00000225335.3	2	16	5	7	2	3	7	3	5	17	9	12	AC016027.1
ENSG00000235617.1	0	0	0	2	0	0	0	0	0	0	0	0	AC016027.4
ENSG00000246089.3	32	21	36	31	15	18	21	29	18	59	28	44	AC016065.1
ENSG00000286122.1	0	1	0	0	0	0	0	0	0	0	0	0	AC016074.2
ENSG00000262833.1	0	0	1	0	0	0	0	0	0	0	0	0	AC016245.1
ENSG00000287403.1	0	1	0	8	6	5	0	0	0	1	2	0	AC016245.2
ENSG00000280291.1	0	0	0	0	0	1	0	0	0	0	0	2	AC016251.1
ENSG00000270964.1	4	3	6	6	6	2	2	0	1	10	5	4	AC016355.1
ENSG00000227540.1	13	6	8	17	13	10	7	9	4	15	5	13	AC016394.1
ENSG00000272599.2	9	14	9	18	11	10	12	3	7	14	5	3	AC016394.2
ENSG00000231906.1	0	0	0	1	1	0	0	0	0	0	0	0	AC016397.1
ENSG00000279822.1	60	67	79	51	67	71	69	44	53	53	31	52	AC016397.2
ENSG00000253372.5	0	0	0	0	0	0	0	0	0	0	1	0	AC016405.1
ENSG00000272384.1	0	2	1	4	0	3	2	0	0	0	4	1	AC016405.3
ENSG00000280078.1	0	0	0	0	0	0	0	0	0	0	0	2	AC016526.3
ENSG00000272627.1	0	0	0	0	0	0	0	0	0	0	1	0	AC016542.1
ENSG00000243744.2	0	0	0	0	0	0	0	0	1	0	0	0	AC016546.1
ENSG00000287581.1	0	0	0	0	0	0	0	0	1	0	0	0	AC016549.1
ENSG00000251405.3	3	1	3	1	1	0	1	0	0	2	1	1	AC016571.1
ENSG00000253968.2	0	0	0	1	0	1	0	0	0	0	0	0	AC016573.1
ENSG00000267422.1	2	0	3	3	3	0	2	3	1	1	1	3	AC016582.2
ENSG00000280159.1	0	0	1	0	0	0	0	0	0	0	0	0	AC016583.1
ENSG00000268670.1	2	4	1	7	3	5	4	1	5	3	3	7	AC016586.1
ENSG00000267124.2	0	0	1	0	0	0	0	1	2	0	0	0	AC016588.1
ENSG00000282393.1	33	54	24	54	52	58	102	91	75	81	140	123	AC016588.2
ENSG00000267605.7	0	0	0	0	0	1	0	1	0	0	0	1	AC016590.1
ENSG00000267682.1	0	0	1	0	0	0	0	0	0	0	0	0	AC016590.2
ENSG00000276846.1	4	1	3	0	0	1	0	0	1	0	0	3	AC016590.3
ENSG00000227908.3	0	2	1	10	11	4	5	6	6	9	4	4	AC016596.1
ENSG00000251205.3	0	0	0	1	0	0	0	0	0	0	0	0	AC016598.2
ENSG00000269600.2	0	0	0	0	0	0	0	0	0	0	0	1	AC016629.2
ENSG00000286104.1	34	76	74	66	57	65	57	76	59	84	56	69	AC016629.3
ENSG00000248475.5	0	0	0	0	0	0	0	0	0	0	0	1	AC016642.1
ENSG00000286081.1	0	0	0	1	0	0	0	1	0	1	0	0	AC016682.1
ENSG00000225392.1	0	0	0	0	0	0	0	0	0	0	1	0	AC016700.1
ENSG00000231414.1	2	0	5	5	1	5	0	1	8	0	3	3	AC016700.2
ENSG00000258010.4	0	0	0	0	1	0	0	0	0	0	2	0	AC016705.1
ENSG00000259495.3	49	87	58	75	46	64	35	36	14	24	19	18	AC016705.2
ENSG00000235225.1	0	0	0	0	0	0	0	0	0	0	0	1	AC016712.1
ENSG00000223427.1	0	0	0	0	0	1	2	0	0	0	0	0	AC016716.1
ENSG00000226548.1	0	0	1	1	1	1	0	1	2	1	0	2	AC016722.1
ENSG00000228925.1	0	0	0	0	0	0	0	0	0	0	1	0	AC016722.2
ENSG00000235335.3	0	2	1	0	0	0	1	0	0	0	0	0	AC016723.1
ENSG00000270820.6	15	16	14	20	19	25	13	11	14	14	12	7	AC016727.1
ENSG00000228305.2	3	6	10	13	13	14	6	7	17	7	17	10	AC016734.1
ENSG00000271151.1	0	0	0	1	0	0	0	0	1	1	1	0	AC016737.1
ENSG00000223947.1	1	0	0	0	0	0	0	0	0	0	0	1	AC016738.1
ENSG00000218175.2	5	2	10	10	10	11	11	7	5	8	9	17	AC016739.1
ENSG00000234997.2	1	2	1	3	1	4	0	3	1	3	6	7	AC016745.1
ENSG00000272563.1	1	3	2	0	1	0	2	1	0	1	4	2	AC016745.2
ENSG00000212978.6	124	173	134	152	117	130	111	51	56	174	112	87	AC016747.1
ENSG00000273302.1	0	0	0	0	0	0	0	0	1	0	1	0	AC016747.3
ENSG00000274769.1	0	0	0	0	0	0	4	0	0	0	0	0	AC016747.4
ENSG00000286456.1	0	0	0	0	0	1	0	0	0	0	0	0	AC016769.5
ENSG00000270195.2	2	2	5	0	0	3	7	4	1	8	8	14	AC016773.1
ENSG00000287306.1	1	0	0	0	0	1	0	1	0	0	0	0	AC016821.1
ENSG00000226380.9	14	11	10	45	36	69	51	138	108	65	163	104	AC016831.1
ENSG00000232716.2	0	0	1	2	1	0	1	0	0	0	0	0	AC016831.3
ENSG00000271204.1	0	0	0	0	0	0	0	1	0	0	0	0	AC016831.5
ENSG00000285106.2	32	48	41	60	50	96	82	194	119	100	181	168	AC016831.7
ENSG00000233223.3	17	25	27	34	19	29	20	25	13	31	40	22	AC016876.1
ENSG00000264772.6	70	125	99	156	144	145	154	224	214	242	352	359	AC016876.2
ENSG00000276384.1	1	2	3	5	0	5	4	2	4	4	5	2	AC016876.3
ENSG00000266036.1	0	1	1	2	1	0	1	0	0	0	0	1	AC016888.1
ENSG00000234624.2	0	0	1	0	0	0	0	1	0	0	0	0	AC016894.1
ENSG00000233862.6	0	0	0	0	1	0	0	1	2	0	0	0	AC016907.2
ENSG00000230732.4	0	0	0	0	3	1	1	0	0	3	0	3	AC016949.1
ENSG00000276136.1	0	1	0	0	3	0	0	3	3	3	1	2	AC016957.2
ENSG00000229915.1	3	2	3	21	37	25	6	13	11	3	20	7	AC016999.1
ENSG00000224959.1	3	0	0	0	1	0	0	2	7	3	18	1	AC017002.1
ENSG00000240350.2	0	1	0	3	0	0	0	1	1	3	6	5	AC017002.3
ENSG00000228814.4	0	0	1	1	0	0	1	1	1	1	0	0	AC017007.1
ENSG00000234841.4	1	0	0	6	4	0	0	0	1	2	0	0	AC017007.2
ENSG00000251126.2	0	1	0	0	0	0	0	0	0	0	0	0	AC017007.5
ENSG00000250076.1	0	0	1	0	0	0	0	0	0	0	0	0	AC017013.1
ENSG00000271709.1	0	0	1	0	0	2	1	0	1	0	1	0	AC017033.1
ENSG00000224549.1	0	0	0	0	0	0	0	1	0	1	2	0	AC017067.1
ENSG00000259915.2	0	0	0	1	0	0	0	0	0	0	1	0	AC017071.1
ENSG00000227359.1	1	1	1	1	3	0	7	0	2	4	2	3	AC017074.1
ENSG00000180105.11	2	1	0	0	0	0	0	0	0	0	0	0	AC017081.1
ENSG00000273064.1	2	0	0	2	2	0	1	0	0	3	3	1	AC017083.1
ENSG00000273275.1	2	0	4	1	3	1	0	0	1	2	2	3	AC017083.2
ENSG00000273398.6	0	3	0	5	0	2	0	2	8	0	2	0	AC017083.3
ENSG00000259985.1	3	7	12	14	6	8	10	5	4	20	8	13	AC017100.1
ENSG00000224376.1	5	4	4	1	2	2	1	1	2	0	1	2	AC017104.1
ENSG00000283312.1	4	2	2	0	1	0	0	0	0	0	0	2	AC017104.4
ENSG00000283491.1	0	0	0	2	0	0	0	0	0	0	0	0	AC017104.5
ENSG00000239775.1	0	0	2	1	0	0	2	0	7	2	2	7	AC017116.1
ENSG00000285596.1	4	5	1	7	2	1	5	1	3	4	2	1	AC017116.2
ENSG00000261684.2	0	0	3	0	0	1	0	0	0	0	0	0	AC018362.1
ENSG00000285942.1	0	1	0	0	0	0	0	8	0	0	2	2	AC018362.3
ENSG00000265778.3	0	3	4	1	2	4	2	4	1	8	5	5	AC018413.1
ENSG00000286186.1	0	0	0	0	0	0	0	1	0	0	0	0	AC018445.5
ENSG00000229839.6	0	0	0	0	0	0	0	0	0	0	0	1	AC018462.1
ENSG00000230154.1	11	7	12	11	7	14	18	10	8	12	8	10	AC018463.1
ENSG00000234520.6	13	11	17	21	15	24	13	18	8	7	7	11	AC018464.1
ENSG00000241556.1	1	6	11	15	6	3	8	8	7	8	7	2	AC018475.1
ENSG00000262560.1	0	0	0	0	0	0	1	0	0	0	0	2	AC018512.1
ENSG00000263798.2	0	0	0	0	0	0	4	0	0	0	0	0	AC018521.1
ENSG00000264243.1	0	0	0	0	0	0	0	2	0	0	0	0	AC018521.3
ENSG00000264920.2	29	29	30	36	30	27	13	17	14	23	18	22	AC018521.5
ENSG00000266821.1	0	0	0	0	0	2	0	0	0	0	0	0	AC018521.7
ENSG00000256206.2	0	2	0	0	0	2	2	2	0	5	2	5	AC018523.2
ENSG00000278330.1	0	2	0	0	0	0	0	0	0	0	2	1	AC018529.2
ENSG00000286501.1	0	1	0	0	0	0	0	2	0	3	9	4	AC018545.1
ENSG00000277559.1	6	6	8	10	6	7	6	5	5	4	5	4	AC018553.1
ENSG00000283689.1	1	9	7	4	1	2	3	1	2	6	6	6	AC018553.2
ENSG00000287885.1	0	0	0	1	0	0	0	0	0	0	0	0	AC018553.3
ENSG00000261590.1	0	0	0	0	0	0	0	0	0	0	0	1	AC018554.1
ENSG00000260465.1	0	0	0	0	0	0	0	0	0	0	0	1	AC018557.1
ENSG00000259675.2	0	0	1	0	0	0	0	0	0	0	0	0	AC018618.1
ENSG00000279133.1	3	4	0	7	6	5	8	18	11	20	42	49	AC018628.1
ENSG00000275778.2	14	43	40	38	39	36	8	32	28	27	35	30	AC018630.2
ENSG00000230715.3	10	16	18	21	19	26	31	21	19	43	40	55	AC018638.2
ENSG00000243302.3	63	76	81	103	101	108	157	151	134	171	214	197	AC018638.4
ENSG00000243679.1	47	59	51	63	70	75	100	90	62	130	122	120	AC018638.5
ENSG00000271344.1	2	5	1	3	2	3	10	7	6	4	8	5	AC018638.6
ENSG00000271553.1	0	1	2	1	0	1	0	0	0	1	2	1	AC018638.7
ENSG00000229677.1	0	0	0	0	0	0	0	1	0	0	1	0	AC018644.1
ENSG00000273014.1	1	0	0	3	0	2	4	2	0	3	0	4	AC018645.3
ENSG00000271122.1	122	174	122	114	132	160	134	83	77	216	141	186	AC018647.2
ENSG00000287032.1	0	0	0	0	0	0	3	0	0	1	1	1	AC018647.3
ENSG00000272905.1	0	1	0	1	0	0	0	0	0	0	1	2	AC018648.1
ENSG00000256967.1	2	1	0	0	0	0	0	0	0	0	0	0	AC018653.3
ENSG00000273306.1	3	6	9	5	1	1	6	1	3	12	4	7	AC018690.1
ENSG00000275393.1	1	0	0	0	0	0	1	0	1	0	2	0	AC018695.6
ENSG00000287125.1	0	0	0	0	0	1	0	0	0	0	0	0	AC018695.9
ENSG00000285190.1	1	3	1	1	4	0	0	0	1	0	2	0	AC018754.1
ENSG00000269388.1	5	3	4	1	4	4	0	4	4	1	3	4	AC018755.3
ENSG00000267062.1	0	1	0	0	0	0	0	0	0	0	0	0	AC018761.2
ENSG00000248599.2	3	0	2	1	1	1	1	0	0	1	0	3	AC018781.1
ENSG00000227632.2	5	11	5	6	11	12	5	6	7	9	19	10	AC018804.1
ENSG00000269894.1	2	1	0	0	0	0	0	1	0	1	0	0	AC018809.1
ENSG00000269982.1	0	0	1	0	0	0	0	0	0	0	0	0	AC018809.2
ENSG00000235978.6	2	5	2	1	1	2	3	2	1	7	2	1	AC018816.1
ENSG00000261173.1	0	0	0	1	1	0	1	0	0	0	0	0	AC018845.3
ENSG00000231409.3	0	1	0	0	0	0	0	0	0	1	2	3	AC018868.1
ENSG00000259751.1	0	0	1	0	1	1	2	0	1	0	2	0	AC018868.2
ENSG00000274765.1	0	2	0	1	1	0	0	1	0	0	0	0	AC018926.1
ENSG00000276533.1	1	1	0	0	0	1	0	0	0	1	0	1	AC018926.2
ENSG00000277548.1	0	1	1	1	0	1	1	1	0	6	3	2	AC018926.3
ENSG00000279980.1	0	0	0	0	0	0	0	0	0	0	0	3	AC018946.2
ENSG00000287023.1	4	1	0	3	1	0	1	1	2	4	4	1	AC018978.1
ENSG00000253336.1	0	0	0	0	0	0	0	0	0	0	1	0	AC018992.1
ENSG00000233611.3	1	4	8	10	6	6	1	4	5	9	11	3	AC019068.1
ENSG00000272711.1	55	63	63	78	76	46	39	52	39	71	86	115	AC019069.1
ENSG00000214559.3	0	0	0	0	0	1	0	1	1	3	0	0	AC019077.1
ENSG00000213963.6	27	31	25	24	22	28	23	9	21	19	13	23	AC019080.1
ENSG00000271996.1	0	0	0	0	0	0	0	0	0	0	1	0	AC019080.5
ENSG00000280374.1	2	4	2	1	1	5	2	1	2	1	2	3	AC019080.6
ENSG00000231822.1	0	0	4	0	0	0	0	2	0	5	0	0	AC019097.1
ENSG00000236039.3	4	2	2	1	5	4	0	0	0	2	0	2	AC019117.1
ENSG00000236318.2	0	0	0	0	0	0	0	0	0	0	4	0	AC019117.2
ENSG00000283321.1	0	0	0	2	0	0	0	2	0	3	14	6	AC019117.3
ENSG00000285577.1	0	1	0	0	0	0	0	0	0	0	0	0	AC019127.1
ENSG00000219391.1	0	0	0	0	0	0	0	0	1	0	0	0	AC019129.1
ENSG00000273106.1	0	0	0	0	0	0	0	0	0	2	0	1	AC019129.2
ENSG00000272777.1	4	4	1	0	5	0	1	1	0	2	0	3	AC019131.2
ENSG00000248980.1	0	4	0	2	2	3	0	2	3	3	1	2	AC019163.1
ENSG00000269210.2	0	0	0	0	0	0	0	0	0	0	1	0	AC019171.1
ENSG00000234584.1	0	0	0	0	0	2	10	4	3	6	13	7	AC019186.1
ENSG00000272784.1	0	0	1	0	0	1	0	0	0	0	0	1	AC019193.2
ENSG00000236283.5	0	0	0	0	1	0	0	0	0	0	4	0	AC019197.1
ENSG00000229852.3	20	45	33	38	28	23	17	6	4	16	14	17	AC019205.1
ENSG00000281469.1	0	0	0	0	0	0	1	0	0	0	0	0	AC019226.1
ENSG00000259182.5	1	0	0	0	0	0	0	0	0	2	0	0	AC019254.1
ENSG00000253764.3	0	2	0	0	1	0	0	2	0	0	1	0	AC019257.1
ENSG00000283239.1	103	0	53	0	0	38	136	177	0	0	0	58	AC019257.8
ENSG00000260288.4	0	0	2	0	0	0	0	0	0	0	1	1	AC019294.2
ENSG00000225421.2	0	0	0	0	0	1	0	0	0	0	0	0	AC019330.1
ENSG00000264666.1	0	2	0	0	0	1	0	0	0	0	0	0	AC020558.1
ENSG00000286980.1	0	0	0	1	0	0	1	0	0	0	0	0	AC020584.1
ENSG00000237133.1	0	2	0	0	1	1	0	0	1	2	0	0	AC020594.1
ENSG00000279254.1	0	1	1	0	0	1	0	0	1	1	3	1	AC020604.1
ENSG00000257243.1	0	0	0	2	0	2	0	0	0	0	0	0	AC020612.1
ENSG00000257964.1	0	2	0	0	2	0	2	6	2	5	7	6	AC020612.3
ENSG00000257674.1	0	0	0	0	0	0	0	1	0	0	0	0	AC020629.1
ENSG00000273123.1	0	0	1	0	0	1	0	0	0	0	0	2	AC020634.2
ENSG00000258231.5	0	0	0	0	2	0	0	0	0	0	0	0	AC020637.1
ENSG00000287873.1	0	0	0	0	0	0	0	0	0	0	0	1	AC020655.1
ENSG00000244705.1	0	0	0	0	1	0	0	3	0	0	0	2	AC020658.1
ENSG00000259198.1	0	0	0	1	0	0	0	0	0	0	0	0	AC020658.2
ENSG00000273786.1	1	0	0	0	0	0	0	0	0	1	0	0	AC020658.4
ENSG00000251161.4	5	2	1	6	5	9	3	5	5	7	6	4	AC020661.1
ENSG00000259463.1	0	0	0	0	0	0	0	1	0	0	0	0	AC020661.2
ENSG00000280036.1	0	0	0	0	0	0	0	0	0	0	1	0	AC020661.4
ENSG00000266994.1	0	0	0	0	0	0	0	0	1	1	0	1	AC020663.1
ENSG00000267077.1	0	3	0	1	1	1	0	1	0	1	0	2	AC020663.2
ENSG00000275056.1	0	0	1	2	0	0	0	0	0	0	0	0	AC020663.3
ENSG00000259560.2	0	0	0	0	1	0	0	0	0	0	0	0	AC020687.1
ENSG00000224722.3	7	4	4	10	4	6	6	2	6	4	5	3	AC020688.1
ENSG00000205682.2	0	0	0	0	0	0	0	0	2	0	0	0	AC020741.1
ENSG00000279122.1	0	0	0	0	0	1	0	0	0	0	0	0	AC020763.2
ENSG00000279569.1	7	0	3	0	0	3	1	1	7	2	2	11	AC020763.4
ENSG00000275441.1	1	2	1	0	0	1	0	1	0	0	0	0	AC020765.2
ENSG00000248930.1	0	0	0	1	0	0	0	0	0	0	0	0	AC020893.1
ENSG00000251467.1	0	0	0	1	0	0	0	0	0	0	0	1	AC020893.2
ENSG00000213757.3	1	2	4	2	1	3	4	0	2	1	5	2	AC020898.1
ENSG00000242858.1	0	0	0	0	0	2	1	0	0	0	0	0	AC020899.1
ENSG00000249180.1	0	0	0	0	0	0	0	0	0	0	2	0	AC020900.1
ENSG00000273654.1	13	12	14	26	16	16	16	14	8	14	12	13	AC020904.2
ENSG00000179066.8	0	0	0	1	0	0	0	0	0	0	0	0	AC020907.1
ENSG00000221857.7	0	0	0	0	1	0	0	0	0	0	0	0	AC020907.2
ENSG00000269303.1	0	0	0	0	0	0	0	0	0	0	0	1	AC020907.3
ENSG00000279619.1	0	1	0	0	2	0	0	0	2	0	2	1	AC020907.5
ENSG00000142539.9	0	0	1	0	0	0	0	0	0	0	0	0	AC020909.1
ENSG00000268518.1	0	0	0	0	0	0	0	0	0	0	1	0	AC020909.2
ENSG00000274104.1	1	1	1	5	2	6	2	2	2	4	1	1	AC020910.5
ENSG00000279329.1	10	7	6	11	8	13	11	6	2	18	12	10	AC020910.6
ENSG00000279971.1	0	0	0	0	0	0	0	0	0	0	1	0	AC020910.7
ENSG00000287961.1	0	0	0	0	0	2	0	0	0	0	0	0	AC020911.3
ENSG00000268056.5	0	0	0	0	0	0	0	0	0	0	1	0	AC020913.1
ENSG00000268201.1	1	0	0	1	1	0	1	0	0	0	2	0	AC020915.1
ENSG00000268516.2	31	32	39	46	34	42	32	12	8	38	20	33	AC020915.2
ENSG00000283515.1	41	72	66	34	35	41	42	0	32	25	0	1	AC020915.4
ENSG00000267519.6	100	148	145	450	418	432	268	299	285	312	452	327	AC020916.1
ENSG00000240418.1	0	0	0	0	0	1	1	0	0	0	0	0	AC020917.1
ENSG00000280332.1	8	11	2	4	1	0	1	3	7	4	7	5	AC020917.4
ENSG00000267706.3	0	2	1	0	0	4	0	0	0	0	0	3	AC020922.1
ENSG00000269275.1	0	0	1	0	0	0	0	1	1	1	0	0	AC020922.3
ENSG00000267260.2	0	0	1	3	2	2	1	0	0	0	1	5	AC020928.1
ENSG00000214890.3	0	1	1	0	0	0	0	0	0	0	0	0	AC020937.1
ENSG00000278897.1	1	0	1	0	0	1	1	2	0	1	2	0	AC020951.1
ENSG00000261469.1	0	0	0	1	0	0	0	0	0	0	1	1	AC020978.4
ENSG00000262160.1	0	1	1	0	0	1	2	0	0	2	0	0	AC020978.5
ENSG00000263276.1	2	3	3	0	0	0	3	1	1	1	5	0	AC020978.7
ENSG00000279649.1	0	0	0	0	0	0	0	2	1	0	0	2	AC020978.9
ENSG00000230580.1	0	0	0	0	0	0	1	0	0	0	0	0	AC021016.1
ENSG00000261338.2	29	68	51	40	44	44	33	28	29	24	13	25	AC021016.2
ENSG00000273361.1	1	2	2	1	1	2	1	0	1	0	0	0	AC021016.3
ENSG00000287009.1	2	3	5	6	1	3	0	2	2	3	2	2	AC021037.1
ENSG00000257830.1	0	0	0	0	0	0	0	0	0	1	0	0	AC021066.1
ENSG00000284883.1	0	0	1	0	0	0	0	0	0	0	1	0	AC021066.2
ENSG00000240950.1	1	0	3	1	1	1	0	0	1	1	2	3	AC021074.1
ENSG00000230551.4	139	199	142	198	155	206	244	175	197	252	290	305	AC021078.1
ENSG00000247877.7	2	0	0	1	1	1	0	0	0	0	0	0	AC021086.1
ENSG00000248925.1	2	0	0	1	2	0	0	2	1	1	1	2	AC021087.1
ENSG00000250848.1	3	4	4	8	4	6	3	2	8	9	8	16	AC021087.2
ENSG00000260774.1	2	0	0	6	3	4	2	5	2	3	5	4	AC021087.3
ENSG00000286001.1	3	23	18	4	17	2	4	13	15	4	23	3	AC021087.5
ENSG00000250619.1	0	0	0	0	0	0	3	2	1	2	6	2	AC021088.1
ENSG00000186019.11	70	100	81	65	54	59	58	52	54	66	85	77	AC021092.1
ENSG00000272661.1	11	8	9	8	8	7	11	9	10	2	9	5	AC021097.1
ENSG00000249863.2	4	2	6	1	6	2	2	3	4	0	1	11	AC021106.1
ENSG00000248719.2	0	0	0	0	0	1	0	0	0	0	1	0	AC021127.1
ENSG00000224097.5	1	0	0	0	1	0	2	1	1	4	5	5	AC021148.1
ENSG00000287262.1	0	6	12	2	2	3	4	0	2	1	2	5	AC021148.2
ENSG00000230747.1	0	0	0	0	1	0	0	0	0	0	0	0	AC021188.1
ENSG00000273007.2	2	2	1	0	0	0	0	0	2	1	0	0	AC021205.3
ENSG00000204876.4	2	2	2	4	3	3	9	4	6	15	28	10	AC021218.1
ENSG00000259397.3	0	0	0	0	0	0	0	1	0	0	0	0	AC021231.2
ENSG00000272267.2	2	1	2	2	2	0	1	2	0	5	3	6	AC021242.3
ENSG00000287548.1	0	0	0	0	0	0	0	0	0	0	1	0	AC021269.3
ENSG00000271966.1	1	0	0	3	0	2	4	3	2	2	2	3	AC021321.1
ENSG00000287214.1	0	0	0	0	0	0	2	2	2	0	1	3	AC021321.2
ENSG00000259548.1	0	0	1	0	0	0	0	0	0	0	0	0	AC021483.1
ENSG00000261229.6	2	4	0	2	2	2	8	1	2	2	5	2	AC021483.2
ENSG00000250286.2	0	0	1	0	0	0	0	0	0	2	0	0	AC021491.2
ENSG00000275897.1	1	0	2	0	2	6	1	1	0	0	0	1	AC021491.4
ENSG00000254041.1	0	3	1	0	0	0	0	4	1	0	0	0	AC021546.1
ENSG00000286450.1	0	1	0	0	1	0	2	2	0	1	0	0	AC021573.1
ENSG00000286602.1	1	0	1	0	0	0	3	2	1	0	2	1	AC021660.4
ENSG00000267665.2	0	0	0	2	0	0	0	0	0	0	0	0	AC021683.3
ENSG00000287646.1	1	1	0	0	2	0	0	0	0	0	0	1	AC021701.1
ENSG00000254037.2	0	0	0	0	0	0	1	0	0	0	0	0	AC021733.3
ENSG00000286282.1	0	0	0	0	0	0	0	0	0	1	1	0	AC021733.4
ENSG00000259407.1	0	0	0	0	0	0	0	2	1	7	6	4	AC021739.2
ENSG00000259416.2	0	0	0	1	0	0	0	0	0	0	0	1	AC021739.3
ENSG00000273674.5	0	0	0	2	0	0	0	0	1	0	0	2	AC021752.1
ENSG00000259584.1	0	0	0	0	1	2	0	0	0	0	1	0	AC021755.2
ENSG00000272800.3	0	2	0	3	0	0	0	0	0	2	1	3	AC021851.1
ENSG00000279347.1	1	0	1	1	0	0	0	0	0	0	0	0	AC021945.1
ENSG00000271716.1	0	0	0	1	0	0	0	1	2	2	2	0	AC022001.2
ENSG00000272483.1	0	1	0	0	4	1	0	0	1	3	4	2	AC022001.3
ENSG00000206567.10	13	12	9	19	13	9	6	8	4	14	10	9	AC022007.1
ENSG00000237807.4	214	324	271	235	192	236	60	55	42	106	49	53	AC022034.1
ENSG00000253369.2	1	3	3	0	2	3	1	0	0	0	0	0	AC022034.3
ENSG00000245648.2	0	1	1	3	1	1	1	0	2	2	2	2	AC022075.1
ENSG00000273989.1	0	0	0	0	1	0	0	0	0	0	0	0	AC022079.1
ENSG00000278733.1	4	0	1	0	0	0	0	2	2	0	0	2	AC022079.2
ENSG00000267169.2	18	34	35	34	33	30	22	24	17	27	29	25	AC022098.1
ENSG00000267783.1	1	0	0	0	0	0	1	0	0	0	0	0	AC022098.3
ENSG00000275091.1	0	0	0	0	0	0	0	2	0	0	0	0	AC022098.4
ENSG00000280187.1	27	31	18	27	17	10	13	4	5	30	13	31	AC022107.1
ENSG00000248898.2	3	1	2	0	0	1	1	0	1	0	0	1	AC022126.1
ENSG00000286261.1	15	13	13	12	8	8	8	12	16	9	11	12	AC022137.3
ENSG00000267892.1	5	2	0	4	3	2	0	0	1	4	0	1	AC022144.1
ENSG00000269378.1	3203	5202	4670	4943	4411	5206	4393	3964	3439	4377	4092	4303	AC022149.1
ENSG00000269825.1	37	40	42	62	44	53	73	47	38	64	61	68	AC022150.4
ENSG00000268093.1	0	0	1	0	0	0	0	1	0	0	3	0	AC022154.1
ENSG00000259939.1	0	3	0	0	0	1	1	1	2	0	0	0	AC022167.1
ENSG00000260276.2	34	39	22	39	31	59	63	60	63	61	126	123	AC022167.2
ENSG00000260979.1	0	0	0	0	0	0	1	0	0	0	1	1	AC022167.3
ENSG00000261481.1	0	0	0	0	2	0	3	3	3	1	10	10	AC022167.4
ENSG00000254777.5	0	1	1	1	0	0	0	0	0	0	0	1	AC022182.1
ENSG00000255397.1	0	0	1	0	0	0	0	0	0	0	0	0	AC022182.3
ENSG00000213399.3	0	1	2	1	3	1	0	0	1	1	2	1	AC022210.1
ENSG00000287625.1	2	4	1	1	1	2	1	0	0	2	0	1	AC022210.2
ENSG00000263786.1	2	0	0	0	0	0	1	0	0	0	1	0	AC022211.1
ENSG00000263843.1	30	28	23	28	15	19	12	12	5	34	18	23	AC022211.2
ENSG00000265800.1	0	0	0	1	0	0	0	0	0	0	0	1	AC022211.3
ENSG00000279035.1	0	3	0	0	2	0	0	1	0	1	0	0	AC022211.4
ENSG00000213386.3	0	0	0	0	0	0	2	2	1	3	0	2	AC022217.1
ENSG00000253736.3	0	1	0	0	0	1	0	0	0	0	0	2	AC022217.3
ENSG00000269954.2	4	4	4	5	5	1	1	1	1	2	7	5	AC022239.1
ENSG00000253712.1	0	0	0	0	0	0	0	0	0	0	1	0	AC022274.1
ENSG00000250983.1	0	1	0	0	0	0	3	0	0	0	0	0	AC022296.3
ENSG00000259531.2	1	1	0	0	0	0	0	0	0	0	0	0	AC022306.1
ENSG00000275580.1	0	1	0	0	0	0	1	0	0	2	0	0	AC022306.2
ENSG00000260391.2	0	0	0	0	0	0	5	0	0	6	4	0	AC022336.2
ENSG00000280042.1	0	5	0	2	0	1	2	3	0	5	3	2	AC022336.3
ENSG00000247934.4	27	21	18	61	35	53	38	30	18	28	31	25	AC022364.1
ENSG00000269886.1	0	1	0	0	1	1	0	1	0	0	3	0	AC022382.1
ENSG00000287878.1	0	0	0	0	1	3	0	1	0	2	2	0	AC022382.2
ENSG00000272410.5	233	117	156	214	240	127	263	253	198	360	352	241	AC022384.1
ENSG00000286373.1	0	3	2	2	5	1	0	2	2	4	2	1	AC022387.2
ENSG00000272140.2	2	3	15	6	6	9	4	3	10	13	9	12	AC022400.4
ENSG00000272916.5	33	37	48	35	13	24	18	15	14	42	25	29	AC022400.5
ENSG00000279088.1	59	57	48	49	37	42	42	31	28	59	43	50	AC022400.6
ENSG00000279689.1	7	15	16	9	13	23	6	5	6	10	11	12	AC022400.7
ENSG00000280238.1	0	0	0	2	0	1	0	0	0	1	1	0	AC022400.8
ENSG00000280161.1	4	6	2	5	3	0	6	4	4	7	9	8	AC022413.1
ENSG00000284762.1	0	0	0	2	0	0	0	0	0	0	0	0	AC022414.1
ENSG00000242615.1	8	9	6	23	20	30	17	9	9	29	24	17	AC022415.1
ENSG00000279923.1	1	2	3	0	0	3	1	4	0	2	1	3	AC022417.1
ENSG00000268747.1	0	0	0	0	0	0	0	0	0	1	0	0	AC022432.1
ENSG00000274654.1	18	27	15	16	19	30	10	11	11	27	7	16	AC022467.1
ENSG00000227040.4	0	0	0	1	0	0	0	0	2	0	0	0	AC022483.1
ENSG00000240477.1	0	0	0	0	0	0	0	0	0	0	0	1	AC022494.1
ENSG00000280399.1	0	0	0	0	0	0	1	0	0	0	0	0	AC022497.1
ENSG00000287200.1	11	5	5	10	7	8	4	6	6	8	5	11	AC022506.2
ENSG00000255750.6	2	0	0	1	3	6	3	2	1	2	1	0	AC022509.1
ENSG00000256234.1	0	0	0	0	0	0	0	2	0	1	0	0	AC022509.2
ENSG00000256894.1	17	13	10	13	19	12	5	3	2	3	2	2	AC022509.3
ENSG00000278095.1	0	0	0	1	0	0	0	0	0	0	0	0	AC022509.4
ENSG00000280401.1	3	1	1	2	0	5	3	4	4	4	3	10	AC022532.1
ENSG00000273747.1	0	1	0	0	0	0	0	0	0	0	0	0	AC022558.3
ENSG00000283033.1	0	0	0	0	0	1	0	0	0	0	0	0	AC022596.2
ENSG00000256802.2	8	5	6	8	5	9	3	0	1	3	3	4	AC022613.1
ENSG00000259523.1	8	7	9	7	11	11	7	11	6	5	8	6	AC022613.2
ENSG00000259644.1	2	0	0	2	3	1	0	0	0	1	0	0	AC022613.3
ENSG00000267364.2	0	0	0	0	0	0	0	1	0	0	0	0	AC022706.1
ENSG00000261303.6	0	0	0	0	0	0	0	0	0	0	0	1	AC022748.2
ENSG00000254444.1	0	0	0	0	0	0	1	0	0	0	0	0	AC022762.1
ENSG00000267940.1	0	1	0	1	0	1	1	0	0	2	0	1	AC022762.2
ENSG00000248538.8	1	0	0	0	0	2	0	0	0	1	0	1	AC022784.1
ENSG00000254340.2	1	0	0	0	0	0	0	0	0	0	0	0	AC022784.5
ENSG00000265984.1	0	1	0	0	0	0	0	0	0	0	0	0	AC022809.1
ENSG00000230647.2	0	0	0	0	0	0	0	2	1	0	0	0	AC022816.1
ENSG00000259921.1	0	0	0	0	1	0	0	0	0	0	0	0	AC022819.1
ENSG00000258677.2	23	44	30	25	34	50	31	17	16	51	44	41	AC022826.2
ENSG00000253833.1	1	2	0	0	0	1	1	0	0	0	1	0	AC022868.1
ENSG00000286113.1	0	0	0	0	0	1	0	0	0	0	1	0	AC022868.2
ENSG00000253636.1	2	3	0	1	2	0	4	0	1	3	1	2	AC022893.1
ENSG00000273792.1	1	0	1	0	0	0	0	0	0	0	0	0	AC022898.2
ENSG00000253608.2	0	2	0	0	0	0	0	0	0	0	0	0	AC022915.2
ENSG00000266947.1	2	15	2	5	3	2	2	5	1	11	4	9	AC022916.1
ENSG00000279250.1	0	0	0	0	0	0	0	0	0	1	0	0	AC022919.1
ENSG00000274281.1	0	2	0	0	1	0	1	0	0	0	0	0	AC022929.2
ENSG00000276282.1	0	1	0	0	0	0	0	0	0	0	0	0	AC022960.2
ENSG00000267601.1	0	1	3	2	1	0	2	0	3	0	1	1	AC022966.1
ENSG00000287539.1	2	2	2	2	8	7	2	4	5	17	8	5	AC022966.2
ENSG00000260747.1	5	6	11	12	6	9	7	3	12	9	5	3	AC022968.1
ENSG00000259172.1	0	0	0	0	1	2	2	1	2	2	2	0	AC023024.1
ENSG00000260552.1	9	9	7	7	5	9	7	7	4	7	3	4	AC023043.1
ENSG00000267404.1	4	0	0	0	0	0	0	0	0	0	0	0	AC023043.2
ENSG00000274849.1	2	2	2	1	1	1	0	1	1	3	3	2	AC023043.4
ENSG00000257390.5	3	0	0	1	5	14	0	4	0	2	0	0	AC023055.1
ENSG00000279077.1	0	1	0	0	0	1	0	0	0	0	0	0	AC023090.2
ENSG00000236605.1	0	0	0	0	0	0	0	1	0	0	0	1	AC023115.1
ENSG00000223722.3	0	1	0	0	0	0	0	0	4	0	1	0	AC023157.1
ENSG00000256843.1	0	0	0	0	0	0	1	1	0	0	0	0	AC023157.2
ENSG00000276900.1	7	7	3	12	8	12	11	7	10	23	17	18	AC023157.3
ENSG00000258357.1	1	2	1	1	1	4	3	1	8	2	6	4	AC023161.2
ENSG00000253891.2	0	0	0	0	0	0	0	1	1	0	3	0	AC023202.1
ENSG00000235981.2	0	0	0	0	0	0	0	0	0	1	0	0	AC023274.2
ENSG00000274461.2	15	13	16	10	4	14	8	7	7	7	9	17	AC023282.1
ENSG00000287655.1	0	0	0	2	0	3	1	2	0	4	3	1	AC023283.1
ENSG00000277749.1	0	0	0	0	0	0	0	0	0	0	1	0	AC023300.2
ENSG00000271983.1	0	0	0	0	0	1	0	0	0	0	0	2	AC023302.1
ENSG00000287108.1	0	0	0	0	1	0	1	1	0	0	0	0	AC023302.2
ENSG00000258488.2	0	0	0	0	0	0	0	0	0	1	0	0	AC023310.1
ENSG00000258707.2	0	1	2	0	1	2	3	0	3	2	0	4	AC023310.2
ENSG00000259488.2	0	3	0	6	1	4	1	2	1	1	1	1	AC023355.1
ENSG00000266968.2	0	0	0	0	0	0	0	0	0	1	0	0	AC023421.1
ENSG00000267193.6	0	0	0	0	0	1	1	1	3	0	2	0	AC023421.2
ENSG00000274307.1	11	24	12	14	27	12	9	12	12	18	18	13	AC023449.2
ENSG00000222031.1	0	0	0	0	0	0	0	0	2	1	0	0	AC023469.1
ENSG00000287720.1	0	0	0	0	0	0	0	1	0	0	0	3	AC023480.1
ENSG00000286579.1	0	2	3	0	1	0	1	0	0	2	0	0	AC023483.1
ENSG00000257379.1	115	89	107	159	85	95	58	49	93	78	51	80	AC023509.1
ENSG00000270175.1	3	6	3	8	7	5	0	6	4	3	4	5	AC023509.3
ENSG00000273658.1	1	0	0	1	0	0	0	0	0	0	0	0	AC023509.4
ENSG00000256211.1	0	0	1	0	0	1	1	1	0	0	0	0	AC023512.1
ENSG00000255437.1	0	0	0	0	0	0	0	0	0	0	1	0	AC023538.1
ENSG00000285600.1	0	1	0	0	0	1	0	1	0	0	2	1	AC023593.1
ENSG00000253704.2	1	2	1	2	2	4	0	1	0	0	2	1	AC023632.2
ENSG00000253374.5	0	0	1	0	0	0	0	0	0	0	0	0	AC023644.1
ENSG00000255621.1	0	0	1	0	0	3	0	0	0	0	1	0	AC023790.2
ENSG00000260033.1	0	0	0	0	0	0	0	0	0	0	1	0	AC023813.2
ENSG00000260052.1	0	0	0	1	0	1	0	0	0	0	0	0	AC023813.3
ENSG00000280067.1	0	0	0	0	0	0	0	1	1	1	2	1	AC023818.1
ENSG00000278434.1	0	0	0	0	0	0	0	0	1	0	2	0	AC023830.3
ENSG00000250966.2	1	0	0	0	0	0	0	0	0	1	0	0	AC023886.2
ENSG00000242327.1	0	1	0	0	0	0	0	0	0	1	0	1	AC023906.1
ENSG00000259712.1	2	0	0	0	0	2	0	0	2	3	2	1	AC023906.5
ENSG00000259580.1	0	0	0	0	0	0	0	1	0	0	0	0	AC023908.2
ENSG00000261136.1	3	2	7	1	1	1	1	5	1	3	1	5	AC023908.3
ENSG00000259493.2	0	0	0	0	0	0	0	0	0	0	1	0	AC023968.2
ENSG00000273321.1	0	0	0	2	0	1	0	0	0	2	0	3	AC023983.2
ENSG00000271870.1	7	6	8	4	5	4	7	5	4	4	6	6	AC024060.2
ENSG00000267904.1	3	5	5	2	3	2	2	2	1	1	0	8	AC024075.1
ENSG00000269044.2	49	40	36	29	26	26	21	23	17	35	24	40	AC024075.2
ENSG00000269427.1	0	0	0	0	0	1	0	0	0	0	0	0	AC024075.3
ENSG00000230649.3	0	0	0	0	0	0	0	0	0	3	1	0	AC024084.1
ENSG00000248515.2	0	0	0	0	0	0	1	0	0	0	0	0	AC024230.1
ENSG00000272969.1	0	0	1	1	0	0	0	0	0	0	0	0	AC024243.1
ENSG00000286872.1	0	0	0	0	1	1	1	1	4	7	26	19	AC024270.5
ENSG00000244313.3	345	514	494	567	425	484	492	425	412	515	664	559	AC024293.1
ENSG00000273771.1	0	2	1	4	1	1	0	0	0	0	0	0	AC024337.2
ENSG00000262410.1	1	0	0	0	0	1	0	0	0	0	0	0	AC024361.1
ENSG00000263063.1	0	0	0	1	0	0	0	0	0	0	0	0	AC024361.2
ENSG00000253330.1	1	0	0	0	0	2	0	1	1	1	2	3	AC024451.2
ENSG00000269924.1	0	0	0	0	0	0	0	0	1	0	0	1	AC024451.4
ENSG00000288436.1	0	0	0	0	0	0	0	0	1	0	0	1	AC024558.2
ENSG00000236833.1	0	0	0	0	0	0	0	1	0	0	0	0	AC024560.1
ENSG00000249626.1	0	0	2	1	2	1	1	0	1	0	2	3	AC024560.2
ENSG00000273308.1	1	1	1	1	1	1	0	0	0	1	0	1	AC024560.3
ENSG00000286909.1	2	2	1	2	3	2	1	0	1	0	2	0	AC024560.4
ENSG00000253558.1	0	0	0	1	0	0	0	1	2	0	0	0	AC024568.1
ENSG00000267277.1	0	1	1	1	0	0	0	2	1	0	1	3	AC024575.1
ENSG00000279794.1	0	5	8	1	1	3	3	7	1	6	3	9	AC024580.1
ENSG00000248827.1	0	0	0	0	0	1	0	0	0	0	0	1	AC024587.1
ENSG00000249959.6	0	0	0	0	0	1	0	0	0	0	0	0	AC024587.2
ENSG00000267740.5	20	16	26	14	16	19	19	16	33	34	32	10	AC024592.3
ENSG00000288011.1	2	2	0	0	0	4	2	0	2	0	0	1	AC024597.1
ENSG00000285837.1	0	0	0	0	0	0	0	0	0	0	0	1	AC024598.1
ENSG00000279668.3	0	0	1	0	0	0	0	0	0	0	0	0	AC024610.2
ENSG00000263781.3	0	0	0	0	0	0	0	1	0	0	0	1	AC024619.4
ENSG00000274569.1	0	0	0	0	0	0	1	0	0	0	1	0	AC024884.1
ENSG00000276272.1	1	2	3	0	1	0	1	1	0	0	1	2	AC024884.2
ENSG00000247903.1	0	0	0	0	0	1	0	0	0	0	0	0	AC024896.1
ENSG00000274021.1	4	4	2	4	7	3	5	6	7	5	6	6	AC024909.1
ENSG00000272656.1	0	0	1	0	0	1	2	0	0	1	0	0	AC024933.1
ENSG00000177340.5	0	2	3	3	3	2	2	1	0	2	4	0	AC024940.1
ENSG00000177359.20	1	0	0	0	0	0	0	1	0	1	0	0	AC024940.2
ENSG00000243517.1	1	1	2	2	2	1	4	2	1	2	0	1	AC024940.3
ENSG00000275097.1	0	0	0	0	0	0	1	0	0	0	3	0	AC024940.6
ENSG00000281333.2	0	0	1	0	1	0	0	0	0	0	1	2	AC024941.2
ENSG00000257496.1	1	0	0	2	1	1	0	0	0	0	0	0	AC025031.1
ENSG00000275481.1	1	0	0	1	4	2	1	0	1	1	0	0	AC025031.4
ENSG00000278896.1	0	1	0	0	0	0	0	0	0	0	0	0	AC025031.5
ENSG00000258302.2	2	0	0	0	0	1	0	0	0	1	0	0	AC025034.1
[truncated: 24,457 more rows]

## Sheet: Log2FC -Log10Pvalue for Volcano
gene_name	Control_1	Control_2	Control_3	LLOMe2h_1	LLOMe2h_2	LLOMe2h_3	Log2FC	Ttest	log10 p-value
TNFAIP3	174	234	187	11707	11914	11607	5.88769	2.44208e-08	7.61224
GADD45A	540	774	741	8298	8181	8309	3.59243	8.97179e-08	7.04712
AC144652.1	29	31	32	345	333	333	3.45801	1.91569e-07	6.71767
NOCT	140	243	211	3287	3151	3147	4.01224	6.87413e-07	6.16278
FOSB	29	42	42	5798	6189	6052	7.31865	8.10532e-07	6.09123
JUNB	772	1519	1412	17946	18975	17838	3.88633	2.45555e-06	5.60985
WTAP	792	993	856	4017	4032	4191	2.21245	2.49324e-06	5.60324
SOD2	987	1003	916	23555	23069	25074	4.62483	2.88346e-06	5.54009
TGIF1	352	412	359	1932	1818	1913	2.33421	2.92305e-06	5.53416
ELMSAN1	664	922	865	5339	5180	5042	2.66649	2.97817e-06	5.52605
RND1	0	1	1	13	13	13	4.2854	3.1859e-06	5.49677
HSPA1A	1147	1393	1462	28636	27783	26221	4.36805	3.27798e-06	5.48439
TMEM88	3	2	3	39	42	42	3.94251	3.41329e-06	5.46683
DLX2	19	34	23	178	178	176	2.80735	4.72132e-06	5.32594
IL1A	10	18	16	394	368	406	4.73039	5.23698e-06	5.28092
PPP1R15B	735	904	807	2631	2685	2753	1.72197	6.40824e-06	5.19326
PPP1R15A	961	998	858	13230	11969	12291	3.73427	7.00341e-06	5.15469
TMEM217	16	26	22	197	206	216	3.2738	7.5576e-06	5.12162
BTG2	82	77	83	744	689	768	3.18508	9.90485e-06	5.00415
IL1B	145	226	132	3430	3848	3769	4.45695	1.16629e-05	4.93319
ZBTB21	268	304	289	1895	1814	2022	2.7347	1.21839e-05	4.91421
DUSP5	353	401	331	3992	3813	4312	3.48127	1.53277e-05	4.81452
ZNF431	113	114	117	177	173	170	0.596103	1.54661e-05	4.81062
KDM6B	403	777	729	6717	6812	7441	3.45744	1.55813e-05	4.8074
BBC3	75	102	83	558	601	541	2.70895	1.63884e-05	4.78546
JUND	1577	2040	2022	8244	7782	7589	2.06619	1.69525e-05	4.77077
BHLHE40	1088	2147	1966	19751	19748	17836	3.46256	1.71713e-05	4.7652
KLF7	891	1530	1450	6594	6995	6810	2.39772	1.86482e-05	4.72936
RIPK2	279	346	247	1586	1484	1645	2.43486	2.06369e-05	4.68536
REL	139	145	132	2127	2395	2445	4.06588	2.48034e-05	4.60549
IL6	191	396	330	7679	7121	8271	4.65301	2.58096e-05	4.58822
CXCL1	10	8	4	2277	2650	2585	8.41555	2.66805e-05	4.57381
MAP3K8	31	21	31	363	368	322	3.66525	2.70225e-05	4.56827
PTX3	2338	3956	2579	14176	13821	14026	2.24369	2.77723e-05	4.55639
HSPA1B	1514	1805	1699	42711	37493	37427	4.55101	2.80951e-05	4.55137
NUAK2	132	172	168	2119	2067	1839	3.6741	2.87541e-05	4.5413
DNAJB1	1687	1959	1900	12794	11157	11878	2.69161	3.04267e-05	4.51675
LATS2	415	578	446	2261	2172	2414	2.25041	3.14042e-05	4.50301
SENP7	90	95	90	132	135	136	0.551348	3.17829e-05	4.49781
SLC16A6	35	28	36	302	268	307	3.14708	3.19693e-05	4.49527
SERTAD2	614	771	703	3789	3409	3854	2.40411	3.36907e-05	4.47249
GPCPD1	135	137	125	517	482	546	1.9604	3.49166e-05	4.45697
PMAIP1	143	148	140	1139	982	1060	2.88372	3.54641e-05	4.45021
AMIGO1	15	15	15	8	9	8	-0.847997	3.68831e-05	4.43317
ATF3	8	14	14	7038	8258	8152	9.34725	3.68856e-05	4.43314
MAFF	162	267	208	6247	5312	5572	4.74917	3.9833e-05	4.39976
KLF6	1244	1317	1145	21558	23540	25497	4.25163	4.0047e-05	4.39743
ZC3H12C	288	347	317	2054	1789	1858	2.58218	4.07804e-05	4.38955
DNAJB4	243	422	373	1557	1540	1652	2.19382	4.16384e-05	4.38051
JMJD1C	1170	1499	1340	7852	7295	8428	2.55594	4.38274e-05	4.35825
AC099778.1	5	4	5	14	13	14	1.5502	4.4346e-05	4.35315
LIF	4588	8264	6387	80860	89088	95391	3.78573	4.60897e-05	4.3364
SLC25A25	232	254	231	1060	932	961	2.04214	4.6311e-05	4.33432
TSC22D2	576	807	736	2319	2172	2310	1.68236	4.76603e-05	4.32184
NKX3-1	183	237	207	1610	1812	1883	3.08082	4.78447e-05	4.32017
HIST2H2BE	53	59	50	125	119	128	1.19931	4.80605e-05	4.31821
AC083837.1	10	11	12	28	26	28	1.31316	5.00229e-05	4.30083
ETS1	1568	1944	1714	12681	11512	13500	2.85052	5.0973e-05	4.29266
HSPA6	2	4	9	1167	1177	1373	7.95303	5.14193e-05	4.28887
USP53	272	344	272	1781	1540	1709	2.50193	5.21828e-05	4.28247
KLF10	768	1171	969	4506	4735	4206	2.20919	5.28539e-05	4.27692
ABL2	1225	1535	1344	15960	13455	15207	3.44265	5.51733e-05	4.25827
ZNF441	46	65	63	226	207	208	1.88124	5.54869e-05	4.25581
ZFP36L1	2819	3702	3614	20465	20095	23127	2.65165	5.68349e-05	4.24538
SRFBP1	142	208	159	550	537	564	1.6976	5.72392e-05	4.24231
MIR155HG	12	16	12	63	57	56	2.1375	5.97751e-05	4.22348
PIM3	215	273	253	2658	2292	2295	3.28944	6.02429e-05	4.22009
IER3	1034	1760	1667	21613	24615	25841	4.01394	6.04528e-05	4.21858
CYP1B1	783	794	620	2144	1969	2055	1.48927	6.25174e-05	4.204
HMGCS1	1057	1302	1159	11999	10917	13044	3.35357	6.26835e-05	4.20285
SQSTM1	5900	7555	7148	25792	23449	26520	1.8786	6.28794e-05	4.20149
HIVEP2	611	823	678	4723	4335	5105	2.74545	6.41027e-05	4.19312
LRIF1	173	299	217	1294	1153	1283	2.4366	6.47654e-05	4.18866
STK40	518	680	655	2500	2234	2515	1.96792	6.61897e-05	4.17921
ZNF267	93	126	93	517	450	481	2.21444	7.01055e-05	4.15425
TSLP	124	163	97	589	531	563	2.13186	7.01213e-05	4.15415
AC012181.2	0	0	1	6	6	6	4.16993	7.02107e-05	4.1536
DUSP10	102	118	103	876	928	1043	3.13984	7.08828e-05	4.14946
CLEC2D	21	59	34	249	253	236	2.69459	7.11076e-05	4.14808
CCNL1	384	464	473	1435	1639	1529	1.80094	7.477e-05	4.12627
AC020916.1	100	148	145	450	418	432	1.72591	7.48913e-05	4.12557
TRAF1	278	281	282	2336	1946	2190	2.94403	7.90345e-05	4.10218
SAT1	235	305	299	1217	1185	1363	2.16591	7.94071e-05	4.10014
DUSP8	57	97	53	915	776	916	3.65469	7.95962e-05	4.09911
KBTBD8	48	68	35	458	405	392	3.05507	7.9675e-05	4.09868
PIM1	99	121	111	1197	1377	1447	3.60265	7.97897e-05	4.09805
RCAN1	349	502	461	1748	1705	1929	2.03637	7.99456e-05	4.09721
CXCL8	303	341	285	49480	53574	60781	7.46235	8.0181e-05	4.09593
NR4A3	18	29	11	413	457	505	4.56723	8.46893e-05	4.07217
EGR3	59	93	65	1996	1872	1628	4.66262	8.48955e-05	4.07112
ZNF217	642	763	694	1549	1508	1645	1.16357	8.53893e-05	4.0686
GPATCH2	159	176	188	309	311	315	0.838155	8.9732e-05	4.04705
DUSP16	350	455	456	1974	1767	2069	2.20397	9.32619e-05	4.0303
BCL6	214	368	370	1721	1878	2010	2.55871	9.36511e-05	4.02849
ZNF670	20	16	20	86	75	87	2.14684	9.54347e-05	4.02029
CDKN1A	3324	4169	3955	11590	10431	11672	1.55735	9.77027e-05	4.01009
ZC3H12A	133	244	262	2645	3231	2871	3.7749	0.000103362	3.98564
NFE2L2	1228	1531	1321	4899	4685	5425	1.87919	0.000105241	3.97781
SAV1	270	406	330	1218	1257	1377	1.93698	0.000106056	3.97446
CEBPB	757	998	923	5849	4902	5195	2.57397	0.000106108	3.97425
VPS37B	970	1153	1075	2455	2237	2410	1.15106	0.000106216	3.97381
TIFA	202	223	168	940	797	876	2.1396	0.000109756	3.95957
ZNF792	39	39	36	10	8	4	-2.37346	0.000111391	3.95315
MCL1	3393	4980	4200	12050	11658	12557	1.52825	0.000115437	3.93765
F3	4207	6865	5305	17102	16939	17058	1.64162	0.000115728	3.93656
TNFAIP8	337	513	505	3017	3023	3543	2.82218	0.000116827	3.93246
KLF9	535	691	686	1743	1963	1868	1.54363	0.000117016	3.93175
PPP1R10	1044	1194	1181	2516	2281	2465	1.08679	0.000118293	3.92704
HSPB8	302	367	380	2679	2628	3146	3.01045	0.000120839	3.91779
PER1	117	123	118	1191	1008	991	3.15552	0.000123336	3.90891
SLC30A1	768	1160	912	3903	3823	4389	2.09283	0.000125443	3.90155
GEM	127	125	116	3178	3408	3962	4.84112	0.000128626	3.89067
IRAK2	244	257	230	3245	2742	3396	3.68211	0.000128834	3.88997
UBC	14611	19385	19796	61416	55199	62834	1.73811	0.000129129	3.88897
EFNA1	33	46	51	2628	2075	2390	5.76981	0.000132094	3.87912
RBM7	291	376	322	841	766	807	1.28738	0.000134874	3.87007
IRF2BP2	1673	2060	1865	5256	4672	5234	1.43748	0.000135107	3.86932
MAFG	715	908	867	3005	2575	2838	1.75733	0.00013916	3.85648
CLK1	373	407	379	871	774	850	1.10616	0.000141204	3.85015
LINC00346	3	1	2	31	32	26	3.89077	0.000141462	3.84936
PTGER4	144	124	82	809	816	960	2.88474	0.000143088	3.8444
MAP2K3	889	1074	902	3341	2858	3130	1.70319	0.000143723	3.84247
NAMPT	547	721	673	1845	1671	1869	1.47215	0.000144889	3.83896
SLC3A2	1364	1952	1698	7337	6225	6870	2.0268	0.000146975	3.83276
DCUN1D3	201	288	257	799	875	921	1.79849	0.000147257	3.83192
MSC	184	348	329	1910	1984	2285	2.84329	0.00014733	3.83171
B3GNT5	111	92	98	538	496	603	2.44322	0.000147618	3.83086
SLC25A33	78	108	91	294	263	295	1.62097	0.000148406	3.82855
FGF5	1286	1651	1476	4866	4905	5598	1.80019	0.000149248	3.82609
AC092718.3	33	30	27	79	70	77	1.32833	0.000149857	3.82432
SMAD7	883	1348	1282	3930	3655	3559	1.66549	0.000155065	3.80949
NFKB1	719	929	769	7711	7728	9332	3.35736	0.000161307	3.79235
ZBTB10	40	68	77	580	524	650	3.24505	0.000163376	3.78681
TIPARP	1183	1493	1236	2929	3094	3235	1.24279	0.000165668	3.78076
FBXW7	172	207	207	352	355	354	0.856452	0.000172565	3.76305
CEBPD	54	72	56	804	671	653	3.54749	0.000172909	3.76218
FOSL2	2012	2265	2042	11559	12461	14237	2.59796	0.000176066	3.75432
SOWAHC	169	213	183	560	516	600	1.5687	0.000176211	3.75397
TNFRSF18	0	0	1	7	7	6	4.32193	0.000177551	3.75068
CSRNP1	384	634	611	2212	2559	2258	2.10933	0.000182529	3.73867
FOXC2	1568	1974	1655	3742	3768	4059	1.15451	0.000185482	3.7317
BACH1	714	1174	1100	4256	4623	5075	2.22343	0.000189078	3.72336
ICAM1	327	551	419	4403	4817	5545	3.50893	0.000190214	3.72076
AMOTL2	1640	2115	2009	7010	6081	6074	1.73333	0.000199608	3.69982
INSIG1	1193	1242	1093	19684	20110	24545	4.18877	0.000199796	3.69941
PTP4A1	501	723	591	1824	1772	2011	1.62726	0.000200722	3.6974
SNAI2	112	172	160	705	683	816	2.31149	0.000200788	3.69726
BCL10	416	597	532	1630	1516	1751	1.66429	0.000203039	3.69242
FP565260.3	3	0	2	26	24	21	3.82782	0.000205511	3.68716
CCDC59	182	202	189	335	307	319	0.746001	0.000206605	3.68486
TBX2	50	66	59	381	306	355	2.57393	0.000210692	3.67635
TRIM47	89	93	87	363	304	312	1.8637	0.000218031	3.66148
NCR3LG1	319	326	260	932	814	946	1.57269	0.000219574	3.65842
LDLR	3212	4057	3573	15560	12875	15017	2.00279	0.000220899	3.65581
DNAJB5	210	202	216	596	505	542	1.3875	0.00022438	3.64902
KDM7A-DT	6	3	2	43	36	45	3.49476	0.000225992	3.64591
CDC42EP2	145	253	269	785	768	847	1.84728	0.000226436	3.64505
ZBTB34	149	202	197	550	497	574	1.56464	0.000226773	3.64441
DUSP2	5	12	10	42	46	49	2.34314	0.000227111	3.64376
RUNX1	788	1150	992	3338	3166	3715	1.80228	0.000229333	3.63953
ELOVL5	1615	2041	1843	4704	4436	5115	1.37423	0.000232385	3.63379
PPP3CC	273	334	310	815	758	886	1.42308	0.000234172	3.63046
ITPRIP	1444	2065	1878	10033	10527	12371	2.61189	0.000236024	3.62704
FOXC1	91	143	133	649	631	765	2.47825	0.000238998	3.62161
ARL5B	332	401	387	1328	1339	1576	1.92159	0.000239088	3.62144
CLDND1	381	412	402	704	655	731	0.806492	0.000242635	3.61505
RNF144B	192	204	194	963	777	856	2.1375	0.000244896	3.61102
UAP1	1542	2071	1741	4414	4139	4637	1.30076	0.000244945	3.61093
LAMC2	46	41	42	90	88	100	1.10771	0.000245169	3.61053
PTHLH	38	81	53	515	551	649	3.31773	0.000254735	3.59391
FEM1B	927	1193	1078	3376	3278	3873	1.71885	0.000256075	3.59163
NFKBIA	506	488	467	5328	4285	4333	3.25482	0.000256209	3.5914
ZNF697	168	282	260	2017	1588	1813	2.93187	0.00025978	3.58539
FOS	14	13	10	417	546	460	5.26527	0.000261073	3.58324
ITPKC	235	340	325	913	932	1053	1.68706	0.000262065	3.58159
DRAM1	440	770	561	2356	2112	2461	1.96808	0.00026209	3.58155
FCRLA	0	5	3	23	25	22	3.12928	0.000262541	3.5808
ZP3	3	2	1	9	9	9	2.16993	0.000265505	3.57593
C3orf52	172	226	174	1604	1294	1627	2.98383	0.000266827	3.57377
AL512274.1	3	0	1	12	12	12	3.16993	0.000268046	3.57179
RNF19B	212	248	234	1007	848	1043	2.06205	0.000269353	3.56968
OSER1	211	238	234	688	620	748	1.58988	0.000270263	3.56821
CXCL2	5	1	1	825	934	699	8.45591	0.000273701	3.56272
SLC19A2	83	136	108	497	537	611	2.33073	0.000280097	3.55269
PLK3	327	561	470	1464	1546	1681	1.78841	0.000280766	3.55166
BTG1	1099	1391	1330	2844	2580	2833	1.11205	0.000281873	3.54995
ZNF699	86	105	97	230	201	216	1.1677	0.000281884	3.54993
SIK1B	1667	2957	2792	8506	8657	9652	1.85433	0.00028229	3.5493
BAG3	2661	3739	3281	9574	8322	8890	1.46825	0.000283197	3.54791
SIRT1	393	491	388	950	876	956	1.12902	0.000284711	3.5456
MVD	445	551	527	1212	1071	1114	1.15735	0.000288675	3.53959
ZSWIM4	369	597	578	2139	1923	2320	2.04734	0.00028982	3.53787
ATXN3	129	141	138	193	202	207	0.561194	0.000290318	3.53713
CYSTM1	241	282	271	468	434	460	0.778516	0.000290724	3.53652
H3F3B	3778	3939	3573	6976	6228	6670	0.815837	0.000290862	3.53631
MXD1	119	229	209	1041	851	968	2.36027	0.000291692	3.53508
PPP1R3D	77	85	77	36	25	28	-1.42513	0.000293089	3.533
ZNF850	55	53	51	24	15	19	-1.4549	0.000293137	3.53293
HMGA2	2325	3261	2828	6899	6442	7152	1.28427	0.000294607	3.53076
TICAM1	322	482	424	1027	980	1061	1.32099	0.000303123	3.51838
RND3	1011	1614	1409	14539	15447	18692	3.59299	0.000306124	3.5141
TBC1D10A	304	470	366	1194	1094	1262	1.63879	0.000306623	3.5134
ERRFI1	3307	5614	4307	12293	12669	13114	1.52529	0.00030671	3.51327
SUOX	223	239	221	157	149	157	-0.560873	0.000309285	3.50964
NAB2	509	838	742	2667	2262	2482	1.82686	0.000311802	3.50612
CD274	315	413	358	1698	1473	1851	2.20924	0.000318613	3.49674
MBNL2	707	913	839	1770	1623	1773	1.07098	0.000318627	3.49672
CXCL3	3	4	4	2399	2062	1777	9.14744	0.000321317	3.49307
BCOR	795	1099	1021	2451	2208	2441	1.28432	0.000321984	3.49217
CPEB4	962	1140	1077	2316	2087	2387	1.09484	0.000323739	3.4898
IRF1	407	395	348	5473	4465	4248	3.62476	0.00032634	3.48633
LINC02104	5	4	3	12	11	12	1.54432	0.000326421	3.48622
SLC7A5	3545	5798	4831	15737	14403	16803	1.72766	0.000330423	3.48093
ADAMTS1	811	773	678	8877	7292	9609	3.51047	0.000332672	3.47798
GRAMD2B	404	541	462	1123	1023	1147	1.22678	0.000332772	3.47785
STARD13	507	823	657	2109	1891	2147	1.62929	0.000333037	3.47751
HSPH1	1799	1893	1791	9195	7254	8466	2.18398	0.000335032	3.47491
FOXO3	1237	1725	1472	4522	4484	5252	1.68509	0.000336098	3.47353
NFKBIE	159	254	243	1079	875	1022	2.18161	0.000336498	3.47302
SDC4	3502	5565	4388	11186	11541	11427	1.34391	0.000340723	3.4676
CYP51A1	1185	1619	1334	3419	3227	3677	1.31886	0.000347878	3.45857
TSC22D3	372	547	505	1143	1129	1229	1.29782	0.000350561	3.45524
NEAT1	893	726	669	5188	4037	4531	2.5879	0.000356816	3.44756
FLVCR1	140	113	142	385	330	388	1.48151	0.000360092	3.44359
SNN	171	188	174	357	319	365	0.965763	0.000362455	3.44075
GLRX	224	264	254	475	438	492	0.921079	0.0003787	3.4217
OSGIN1	64	85	82	333	268	293	1.95238	0.000383856	3.41583
HMGCR	1195	1456	1312	6932	6679	8415	2.47454	0.000386298	3.41308
MSMO1	1120	1460	1216	4122	4147	4936	1.79853	0.00039169	3.40706
ACBD4	103	100	94	69	66	69	-0.541894	0.000393694	3.40484
MAB21L1	607	784	737	133	130	124	-2.45909	0.000395191	3.40319
SIK1	244	473	487	1660	1421	1554	1.94473	0.000400524	3.39737
NEDD4L	1405	1910	1627	7297	5928	7287	2.0533	0.000406959	3.39045
PI4K2A	1477	1807	1647	3031	2832	3093	0.860974	0.000408702	3.38859
ZSWIM6	379	572	499	1494	1329	1571	1.59948	0.000417351	3.3795
IER2	909	1499	1230	3706	4255	3713	1.68208	0.000425304	3.3713
PIWIL2	0	2	2	10	9	9	2.80735	0.000427093	3.36948
GORAB	119	178	149	364	336	357	1.24486	0.000428982	3.36756
BAMBI	603	1074	962	3443	2886	3254	1.86049	0.000434584	3.36193
GZF1	257	299	275	858	707	840	1.53312	0.000436138	3.36038
CCNG2	287	492	464	1193	1150	1278	1.54256	0.000439189	3.35735
ZNF614	147	164	156	258	235	242	0.654322	0.000441221	3.35534
KLF7-IT1	1	0	0	6	5	5	4	0.000447238	3.34946
IDI1	651	804	683	2733	2482	3133	1.96517	0.000447608	3.3491
OXSM	71	80	81	35	30	24	-1.38225	0.000448343	3.34839
MEX3B	227	251	236	1079	895	866	1.99189	0.00045369	3.34324
CHMP1B	531	724	644	1558	1455	1694	1.30957	0.000462662	3.33474
EVA1A	507	718	655	1764	1543	1804	1.44287	0.000463133	3.33429
GMEB1	235	289	242	491	460	455	0.87618	0.000468253	3.32952
CLCF1	342	546	465	1482	1640	1823	1.86981	0.000480617	3.3182
JDP2	31	56	53	153	162	181	1.82491	0.000482942	3.3161
GPRC5A	2622	3553	3188	6167	5937	6285	0.9738	0.000483873	3.31527
STX11	25	46	29	153	140	174	2.22342	0.000490838	3.30906
FOXP2	47	47	49	105	89	95	1.01505	0.000496719	3.30389
AC009549.1	84	106	117	395	317	372	1.82005	0.000496964	3.30367
RETREG1	86	70	77	458	365	475	2.47789	0.000503075	3.29837
LENG9	21	22	18	49	44	42	1.14608	0.000508424	3.29377
KBTBD2	524	722	576	1333	1236	1338	1.10054	0.000514406	3.28869
TLNRD1	408	483	451	1450	1167	1345	1.56184	0.00051546	3.28781
NIPAL1	107	158	143	298	288	295	1.11057	0.000515627	3.28766
FEM1C	321	442	358	868	808	920	1.2115	0.000522702	3.28175
INHBA	2753	4487	4068	28247	30253	37196	3.08111	0.000522931	3.28156
ANKRD34A	147	163	172	64	70	48	-1.40509	0.000525115	3.27975
PNRC2	1052	1297	1067	2530	2351	2743	1.15824	0.000531912	3.27416
SNAI1	306	573	493	1782	1992	2233	2.13036	0.000533425	3.27293
CTTNBP2NL	724	938	846	2024	2102	2408	1.38143	0.000535936	3.27089
NR4A1	89	112	93	809	634	634	2.82061	0.000537855	3.26933
EGR2	7	20	12	678	920	929	6.01781	0.000545433	3.26326
EGR4	0	1	0	176	140	127	8.79116	0.000551116	3.25876
SIX1	532	640	624	263	229	221	-1.33281	0.000557847	3.25348
AL356235.1	4	5	4	1	1	1	-2.11548	0.000562004	3.25026
AL078459.1	1	1	0	4	4	4	2.58496	0.000562004	3.25026
NAB1	344	452	421	1144	1085	1321	1.54449	0.000564026	3.2487
KBTBD4	325	354	337	220	210	185	-0.724242	0.000564706	3.24818
IFIH1	116	124	120	290	240	271	1.15381	0.000569968	3.24415
CPEB2	194	279	268	990	982	1219	2.10646	0.000575179	3.2402
ATP2B1	1486	1997	1578	4127	3809	4465	1.29296	0.000575546	3.23992
TNFRSF10B	2726	3644	3270	8844	7395	8166	1.34007	0.000580143	3.23647
TRMO	90	112	98	164	163	165	0.713696	0.000580919	3.23588
HSD17B7P2	11	8	13	60	46	54	2.32193	0.000583169	3.23421
EPPK1	24	33	39	90	81	93	1.45943	0.000584411	3.23328
IL21R	33	34	28	92	78	96	1.48543	0.000586771	3.23153
TEX10	481	569	562	1198	1024	1156	1.06732	0.000587432	3.23104
SALL2	335	398	395	152	120	100	-1.60039	0.000588488	3.23026
DYRK3	539	739	637	2908	2259	2732	2.04433	0.000592377	3.2274
PIP5K1A	1371	1704	1547	2851	2599	2781	0.83255	0.000593923	3.22627
LMO4	467	585	623	1279	1230	1431	1.23403	0.000594292	3.226
PLEKHF2	244	263	212	586	508	508	1.15581	0.000601721	3.2206
AC015813.1	68	67	65	28	14	13	-1.8625	0.000602772	3.21985
LRRC37B	42	38	34	72	66	66	0.839535	0.00060297	3.2197
AOC2	5	6	6	15	15	18	1.4975	0.000606962	3.21684
AL162595.1	70	65	69	51	51	53	-0.396301	0.000607695	3.21631
PALM2-AKAP2	3942	5005	4354	13187	11581	14431	1.55928	0.000608163	3.21598
FGD4	484	569	432	1222	1202	1049	1.22572	0.000609609	3.21495
RBM39	1503	1871	1644	3544	3090	3378	0.996546	0.000616962	3.20974
NINJ1	800	985	928	2009	1727	1849	1.04167	0.000622111	3.20613
SDCBP	1389	1567	1454	2984	2585	2978	0.954639	0.000627472	3.20241
SYT1	503	606	583	886	862	892	0.641808	0.000628881	3.20143
TP53BP2	704	879	768	2142	1777	2098	1.35577	0.000630431	3.20036
IFNAR2	209	335	330	855	871	1009	1.64584	0.000631288	3.19977
IL6R	23	15	25	142	111	147	2.66658	0.000650582	3.1867
UGDH	2988	4243	3381	8853	9139	10462	1.42293	0.000655366	3.18352
JUN	1531	1966	1885	12519	11750	9297	2.64079	0.00066346	3.17818
SERPINB2	374	326	157	2056	1552	1852	2.67153	0.000668589	3.17484
ZNF525	34	37	35	26	26	27	-0.42414	0.000672594	3.17225
IQCC	52	58	54	20	29	25	-1.1481	0.000674217	3.1712
NFIL3	106	167	161	1338	1700	1864	3.4976	0.00068226	3.16605
PPP4R1L	82	66	89	211	181	217	1.36156	0.000684939	3.16435
NABP1	299	376	339	1467	1141	1437	1.99608	0.000685888	3.16375
VPS37C	394	478	448	837	747	772	0.835802	0.000687293	3.16286
SOCS6	472	551	548	1027	897	1004	0.898232	0.000688355	3.16219
XBP1	1553	2450	2224	5367	4904	5605	1.35024	0.000688511	3.16209
PANK3	991	1295	1208	2523	2291	2657	1.09642	0.000693952	3.15867
ELL	197	311	305	720	757	849	1.51652	0.000696756	3.15692
AMN	2	0	1	10	10	8	3.22239	0.000699578	3.15516
HSD17B7	138	136	99	366	302	343	1.43854	0.000711792	3.14765
ARL17A	134	130	141	102	100	95	-0.447459	0.000713721	3.14647
EIF1B	207	288	232	546	491	549	1.12537	0.000715287	3.14552
GADD45B	542	862	777	2600	2430	2098	1.70851	0.000718863	3.14335
HIVEP1	499	921	739	3110	3659	4094	2.33099	0.00072416	3.14017
KLHL15	97	115	95	278	237	233	1.2848	0.00072885	3.13736
ZNF394	145	156	146	250	290	289	0.891097	0.000730976	3.1361
RYBP	766	1061	940	1988	2055	2301	1.19707	0.000739197	3.13124
MAPK6	971	1394	1110	3237	2739	3215	1.40321	0.000740868	3.13026
CCL2	731	1676	1230	4232	5082	4965	1.97307	0.000741392	3.12995
KLF5	156	258	192	1095	900	1200	2.39843	0.000744805	3.12796
DUSP1	749	1203	1116	5454	7375	6237	2.63563	0.00075072	3.12452
FILIP1L	488	1118	1038	3773	4397	4866	2.30171	0.000751021	3.12435
NFKBID	23	27	18	60	62	72	1.51245	0.000755102	3.12199
KIAA1217	241	302	275	792	671	841	1.49397	0.000757495	3.12062
TRAF4	592	792	686	1346	1242	1287	0.904566	0.000764006	3.1169
USP54	374	396	376	980	792	921	1.23261	0.00077026	3.11336
MTHFD2	926	1072	987	1867	1629	1825	0.833966	0.000777081	3.10953
AC026356.1	15	22	19	48	53	59	1.51457	0.000777907	3.10907
HOMER2	6	7	6	10	11	11	0.752072	0.000777907	3.10907
DHCR7	1285	1651	1479	2881	2577	2800	0.903379	0.000779314	3.10829
C21orf91	86	115	87	238	204	223	1.20729	0.000779688	3.10808
MNT	534	709	655	1711	1737	2088	1.54436	0.00078237	3.10659
HEXIM1	1009	1249	1234	461	373	371	-1.53502	0.000783993	3.10569
AC115284.4	0	3	0	11	11	10	3.41504	0.000785043	3.10511
HRCT1	20	22	21	13	11	10	-0.889817	0.000785043	3.10511
CCDC117	349	393	366	973	790	857	1.24161	0.000785619	3.10479
USP2	29	37	43	106	88	102	1.44127	0.00078576	3.10471
ANKRD12	321	450	402	957	869	1038	1.28783	0.000793283	3.10057
JARID2	542	597	540	1193	999	1124	0.981842	0.000798651	3.09764
CRYAB	10	32	30	155	165	204	2.8635	0.000801099	3.09631
TP53INP2	538	739	641	1559	1506	1801	1.34313	0.000802206	3.09571
LINC00265	38	36	36	104	100	83	1.38355	0.000803303	3.09512
E2F7	548	298	286	3491	2588	3459	3.07481	0.00080854	3.0923
NPC1	716	831	709	3473	2755	3665	2.13264	0.000808769	3.09218
PTOV1-AS2	22	21	23	42	36	41	0.850424	0.000812361	3.09025
ADNP2	563	659	534	1310	1123	1169	1.03651	0.000815286	3.08869
RNF139	363	483	426	979	837	919	1.10444	0.000821191	3.08556
MSANTD3	704	848	829	2468	2016	2547	1.56216	0.000829733	3.08106
METRNL	247	318	279	964	756	915	1.64249	0.000830168	3.08083
BIRC3	88	95	74	997	723	787	3.28612	0.000830367	3.08073
RCL1	166	164	184	262	242	263	0.577458	0.000833124	3.07929
PNPLA8	270	414	332	824	816	940	1.34447	0.00083854	3.07648
KLF11	88	98	86	496	369	415	2.23447	0.000841637	3.07488
CREB5	132	165	137	1610	1194	1667	3.36483	0.000841931	3.07472
ARID5B	1104	1478	1486	4853	5885	6460	2.07985	0.000846595	3.07232
PHLDA1	3466	4196	3295	6366	7051	6693	0.87606	0.000851437	3.06985
FAM53C	904	1065	965	2252	1865	2117	1.08729	0.000857456	3.06679
AL158050.1	56	62	43	228	174	203	1.90987	0.000870823	3.06007
NEDD9	225	492	432	4111	5043	5888	3.71055	0.000875502	3.05774
NFKB2	912	1280	1128	4364	3353	3935	1.81132	0.000878142	3.05644
HRK	0	2	0	41	28	37	5.72792	0.000886437	3.05235
CITED4	38	38	55	207	176	158	2.04606	0.000888656	3.05127
HLX	47	47	74	811	786	1080	3.99408	0.000901515	3.04503
TNFSF9	43	48	49	426	305	348	2.9462	0.000909386	3.04125
AL135905.2	1112	1372	1207	2459	2383	2802	1.05032	0.00091667	3.03779
ZNF382	81	74	70	126	113	125	0.694013	0.000923438	3.03459
ELOVL7	4	4	5	193	152	225	5.45438	0.000925026	3.03385
LURAP1L	40	25	22	440	309	357	3.66819	0.000926122	3.03333
KRT8P12	67	81	84	142	128	138	0.814444	0.000933149	3.03005
BSDC1	763	882	919	1429	1315	1439	0.706142	0.000936694	3.0284
STX3	206	222	209	756	598	778	1.74284	0.00093704	3.02824
SREBF2-AS1	1	7	3	29	29	37	3.11042	0.000937069	3.02823
DUSP14	427	599	493	1153	1029	1196	1.15305	0.000940474	3.02665
ABTB2	328	443	353	1187	984	1250	1.60578	0.000940935	3.02644
ZEB2	639	893	764	2269	1826	2065	1.42381	0.000948285	3.02306
TAF4B	30	45	42	153	118	142	1.81963	0.000949079	3.0227
SHF	5	8	10	21	21	20	1.43063	0.000952378	3.02119
AC079949.2	0	0	1	20	14	20	5.75489	0.000955532	3.01975
MSX1	47	63	62	242	196	262	2.02495	0.000957963	3.01865
TUBE1	76	93	79	197	166	200	1.18279	0.000959759	3.01784
KCNRG	10	10	12	2	4	3	-1.83007	0.000963969	3.01594
SPSB1	622	980	796	2100	1917	2294	1.39604	0.000965469	3.01526
ELF4	700	905	802	2215	1812	2218	1.37547	0.000966129	3.01496
KIF1B	1119	1487	1295	3488	3098	3894	1.42572	0.000977433	3.00991
CREBRF	86	132	121	408	396	506	1.95021	0.000990611	3.0041
MAFK	566	1063	962	2284	2343	2593	1.47849	0.000991521	3.0037
ERBIN	1619	2164	1741	4763	4433	5495	1.41115	0.000996984	3.00131
KANSL1L	72	69	73	162	132	146	1.03989	0.00100017	2.99993
NOTCH2NLC	63	83	58	156	153	178	1.25535	0.0010066	2.99714
ATF4	3040	4326	4037	9370	7933	8906	1.20065	0.00101445	2.99377
IFIT1	76	74	75	49	40	36	-0.847997	0.00101588	2.99316
GEMIN4	582	626	578	313	197	194	-1.34308	0.00101822	2.99216
TUFT1	673	1129	1045	3188	2576	2875	1.60142	0.00102187	2.99061
USP36	734	928	831	2547	2000	2416	1.48183	0.00102448	2.98949
UGCG	2395	2883	2360	4617	4180	4660	0.81709	0.00104799	2.97964
NCOA7	540	891	757	1621	1640	1760	1.19836	0.00105201	2.97798
CHIC2	271	533	474	1224	1304	1466	1.64395	0.00105396	2.97717
ZCCHC2	212	315	231	731	613	743	1.46116	0.00105475	2.97685
DKK1	439	583	408	932	1008	1010	1.0447	0.00105782	2.97559
DAXX	1045	1224	1142	2003	1768	1993	0.756876	0.0010619	2.97392
CEBPG	266	323	261	1060	829	862	1.69442	0.00106541	2.97248
SLC10A7	68	92	88	150	155	166	0.925387	0.00107614	2.96813
AC145098.2	23	63	45	156	141	160	1.80263	0.00109755	2.95957
ANKRD33B	47	41	27	792	558	595	4.08006	0.00111345	2.95333
KLHL24	225	306	303	567	521	592	1.01034	0.0011147	2.95284
MIDN	1127	1562	1447	2651	3014	3053	1.07576	0.00111568	2.95246
PNISR	595	672	609	1099	961	1002	0.706814	0.00111815	2.9515
RAB32	416	608	548	1308	1179	1438	1.32009	0.00112039	2.95063
BIRC2	947	1169	1008	2576	2094	2466	1.19172	0.00112462	2.949
ARRDC3	856	1074	975	2600	2281	2087	1.26221	0.0011269	2.94811
MMP25	8	18	10	70	93	97	2.85244	0.00112858	2.94747
AC135977.1	9	15	13	71	52	68	2.36798	0.00112993	2.94695
BPGM	257	294	290	447	413	466	0.656903	0.00114133	2.94259
JOSD1	1202	1453	1274	2755	2313	2624	0.969197	0.00114198	2.94234
CDC42SE1	1419	1853	1696	3592	3230	3898	1.10957	0.00115088	2.93897
RHOB	1933	3289	2825	6179	7116	6934	1.3299	0.00116211	2.93475
NAMPTP1	77	103	75	299	262	231	1.635	0.00116276	2.93451
AL109918.1	348	361	364	235	181	177	-0.855546	0.00116416	2.93399
AC098484.3	27	31	30	42	43	40	0.506353	0.00116479	2.93375
ARID5A	193	294	274	1458	1851	2091	2.82699	0.00116872	2.93229
KLHL21	1025	1320	1213	7677	5428	6628	2.47147	0.00119043	2.92429
MICB	333	256	247	1511	1102	1247	2.20703	0.00120011	2.92078
RANBP6	560	676	583	320	314	309	-0.947816	0.00120418	2.91931
AC009831.1	9	13	16	38	38	32	1.50696	0.00120908	2.91754
LRRC8C-DT	10	4	8	32	33	26	2.04836	0.00121139	2.91672
FLCN	284	392	382	997	813	1007	1.41282	0.00122838	2.91067
LTO1	219	235	246	455	382	441	0.868461	0.00124583	2.90454
ZNF597	59	48	76	189	182	152	1.51497	0.00125469	2.90146
ZFP69B	47	68	43	121	114	118	1.15974	0.0012563	2.90091
SIAH1	204	163	175	418	344	378	1.07267	0.00126212	2.8989
TRIB1	436	551	546	3329	4686	4731	3.05561	0.00126386	2.8983
LITAF	616	837	764	1550	1412	1673	1.06396	0.00126467	2.89802
EGR1	642	1348	1112	7261	10550	9706	3.14905	0.00127764	2.89359
UBALD2	329	306	321	868	674	782	1.28153	0.00128252	2.89194
GABARAPL1	281	568	522	1279	1413	1551	1.62986	0.00128304	2.89176
JMJD6	314	496	444	1131	1003	1242	1.42878	0.00128548	2.89093
MAP3K1	80	89	92	48	34	33	-1.18242	0.00128588	2.8908
ADM2	0	2	0	7	7	6	3.32193	0.00129298	2.88841
CSGALNACT2	391	579	524	1232	1140	1400	1.33615	0.00129579	2.88747
USP12	470	579	522	1489	1226	1592	1.455	0.00129861	2.88652
TBC1D22B	182	272	261	514	468	488	1.0398	0.00130147	2.88557
FDFT1	1346	1508	1352	3045	2484	2875	0.998627	0.00130745	2.88357
OSGIN2	344	433	359	756	663	773	0.948285	0.00131035	2.88261
SRXN1	901	1182	989	2653	2279	2898	1.34983	0.00132233	2.87866
PADI1	10	14	14	27	24	27	1.03747	0.0013239	2.87815
UPP1	432	446	399	887	734	785	0.913878	0.00132867	2.87658
SLC39A14	2261	3257	2948	6627	5691	6725	1.16951	0.0013371	2.87384
NCF2	22	21	26	61	67	80	1.59192	0.00134154	2.8724
EIF1	4177	5666	4987	10242	8874	9926	0.969622	0.00136419	2.86512
CDV3	2988	3979	3338	7516	6368	6906	1.01255	0.00136777	2.86399
TUBB2A	743	1293	1131	2817	2688	3247	1.4665	0.00137221	2.86258
MYCT1	3	3	4	17	19	24	2.58496	0.00138494	2.85857
SQLE	995	1515	1270	2980	2651	3160	1.21764	0.00139231	2.85627
AC080038.1	5	10	11	44	33	43	2.20645	0.00139657	2.85494
FOXN2	169	218	168	486	405	510	1.3359	0.0014035	2.85279
MT-RNR1	2088	3195	3261	7023	6205	7350	1.26812	0.00141842	2.8482
DDX20	256	300	286	169	142	133	-0.923261	0.00142099	2.84741
SATB2	327	365	357	499	485	458	0.459056	0.0014233	2.8467
OTUD1	37	43	22	140	180	195	2.336	0.00143047	2.84452
GDF15	0	5	3	24	18	24	3.04439	0.00144295	2.84075
CLDN1	53	66	66	655	562	833	3.47003	0.00145203	2.83802
CSF2	26	11	11	1823	1205	1363	6.51537	0.00145263	2.83785
ADIPOR2	1298	1692	1581	2880	2597	2996	0.890363	0.00145688	2.83658
MFSD2A	108	118	96	343	259	312	1.50513	0.00146551	2.83401
GBP2	72	121	114	305	254	262	1.41914	0.00147128	2.8323
MED13L	681	1025	883	1744	1620	1687	0.964174	0.00150168	2.82342
SMIM13	276	385	295	704	607	662	1.04531	0.00150173	2.82341
TSHZ1	173	178	169	131	111	126	-0.498806	0.00150336	2.82294
NFKBIZ	208	258	186	1685	2500	1986	3.24256	0.00152983	2.81536
SERPINB8	579	763	589	1683	1360	1472	1.22538	0.00153567	2.8137
TNFAIP2	284	283	291	1970	1382	1547	2.51344	0.00153679	2.81339
SIX5	263	323	333	975	781	772	1.45986	0.00153715	2.81328
SMURF1	931	1169	1094	2134	1803	2008	0.896312	0.00154214	2.81188
THAP11	399	444	440	259	210	178	-0.987684	0.00154411	2.81132
ATXN7	145	328	189	883	742	954	1.96191	0.00154583	2.81084
DUSP6	357	603	450	1507	1884	2046	1.94712	0.00155422	2.80849
PLEKHM1	571	823	714	1575	1365	1614	1.11126	0.00155422	2.80849
PKNOX1	240	282	272	530	462	567	0.97341	0.00155493	2.80829
PARD6B	34	31	28	51	48	46	0.64075	0.00155574	2.80806
PAQR9	4	8	8	54	37	46	2.7761	0.00155732	2.80762
SLC35G1	126	156	140	303	249	282	0.982804	0.00156733	2.80484
GNA13	721	869	747	1579	1360	1649	0.973208	0.00158057	2.80119
ZNF136	60	70	67	113	101	100	0.672569	0.00159549	2.7971
ZNF460	17	16	15	48	65	65	1.89077	0.00160215	2.7953
ZRANB1	911	1173	1093	2009	1783	2079	0.885941	0.00161382	2.79215
C16orf72	1622	2222	1896	3732	3303	3582	0.887254	0.00161623	2.7915
LPIN1	1072	1248	1137	3187	2446	2978	1.31666	0.00161992	2.79051
AL118506.1	120	118	106	441	347	333	1.70431	0.00162802	2.78834
HRH1	282	347	367	1035	900	1215	1.66113	0.00162813	2.78831
DNAJA1	2478	3029	2739	5554	4624	5183	0.897506	0.00163959	2.78526
AC008966.3	0	1	3	8	8	8	2.58496	0.00164129	2.78481
HKDC1	15	8	2	40	36	38	2.18903	0.00164986	2.78255
AMPD3	136	158	141	553	401	497	1.73796	0.00165204	2.78198
FRMD6	3400	4977	4151	11242	10511	13500	1.49259	0.00168018	2.77464
BTG3-AS1	8	4	4	35	48	35	2.88264	0.00169156	2.77171
ASB13	194	215	244	105	96	77	-1.232	0.00169599	2.77058
KCTD11	377	767	760	1759	2043	2201	1.65665	0.00170386	2.76857
EIF2AK3	433	729	610	1425	1411	1678	1.34903	0.00170612	2.76799
TET3	450	774	703	1763	1855	2236	1.60307	0.00170877	2.76732
RICTOR	279	464	392	943	823	981	1.27516	0.00171144	2.76664
ZNF675	74	74	68	44	29	33	-1.02697	0.00171902	2.76472
ZNF442	0	4	2	25	25	35	3.82443	0.00172119	2.76417
SEC14L1P1	10	11	10	20	25	21	1.0902	0.0017236	2.76356
HBEGF	517	965	730	10428	12981	16195	4.16222	0.00173577	2.76051
CD83	79	37	46	835	563	625	3.64243	0.00173579	2.7605
KDM6A	300	371	359	892	695	810	1.21859	0.00173836	2.75986
RNF19A	367	550	512	1090	981	1190	1.19031	0.00174987	2.75699
MELTF	5	11	16	42	38	48	2	0.00175297	2.75623
HECW2	453	676	527	1306	1103	1204	1.12549	0.00176302	2.75374
BCL2L2	455	561	534	744	765	769	0.5555	0.00176689	2.75279
ARL8A	410	545	529	837	801	854	0.747813	0.00177211	2.75151
SERTAD1	229	413	351	758	797	725	1.19917	0.00177225	2.75148
ZNF804A	84	121	96	200	204	182	0.961137	0.00177359	2.75115
BCL2L11	90	106	72	170	162	162	0.882278	0.00177616	2.75052
PATL1	786	847	820	1585	1297	1472	0.827794	0.00177768	2.75015
GPR176	2166	2878	2435	4285	3994	4175	0.735692	0.00178296	2.74886
TFPT	114	117	120	141	138	148	0.282765	0.00179539	2.74584
AC010969.2	62	59	66	39	27	31	-0.946982	0.00180338	2.74391
ZNF778	138	200	153	306	297	312	0.898049	0.00180647	2.74317
TFAP2A	559	758	632	1307	1193	1429	1.01143	0.00180692	2.74306
TLR2	15	9	5	41	36	47	2.09622	0.00182359	2.73907
OSR1	229	338	276	47	50	21	-2.83675	0.00182492	2.73876
AC027290.2	13	7	14	46	36	37	1.80735	0.0018315	2.73719
AP5Z1	416	526	551	1335	1059	1341	1.32289	0.00183583	2.73617
SMOX	210	311	254	509	469	488	0.919617	0.00184646	2.73366
RRAGC	480	617	458	1086	936	990	0.953807	0.00185005	2.73282
MOSMO	134	162	161	247	243	277	0.747032	0.0018522	2.73231
FASTKD3	79	90	102	43	41	40	-1.12795	0.00185936	2.73064
RASAL2-AS1	18	32	19	89	104	125	2.20436	0.001874	2.72723
BTG3	269	289	288	621	499	533	0.966357	0.00188745	2.72413
SC5D	409	593	435	1132	1055	1307	1.28182	0.00188913	2.72374
FGF2	1341	2275	1791	6148	6650	8360	1.9683	0.00189785	2.72174
AL117339.5	10	16	19	52	41	44	1.60618	0.00189845	2.7216
SPHK1	1221	1633	1515	3685	2917	3286	1.17838	0.00190997	2.71897
PPIL4	292	362	318	484	467	490	0.568042	0.00191994	2.71671
STAT5A	3	1	4	25	17	24	3.04439	0.00192145	2.71637
DCP1A	414	489	475	819	699	787	0.742191	0.00192285	2.71606
TM4SF1	4021	4293	3851	6457	5616	6070	0.576677	0.00192583	2.71538
ZIC5	2	0	0	7	9	10	3.70044	0.00193521	2.71327
SMCR8	721	841	771	1324	1141	1243	0.668455	0.00193736	2.71279
AC245297.1	85	138	118	247	241	223	1.06008	0.00193882	2.71246
SLC9A3-AS1	78	96	83	123	128	127	0.556618	0.00194039	2.71211
C2orf76	35	41	34	52	55	54	0.549557	0.00195932	2.70789
UTP25	450	509	431	1078	852	1029	1.09002	0.00196265	2.70716
AC124798.1	52	47	43	157	116	151	1.57817	0.00196724	2.70614
CACNB1	99	116	120	198	191	228	0.881109	0.00196724	2.70614
POGZ	794	890	859	1346	1172	1287	0.581365	0.00196848	2.70587
AL161421.1	11	6	10	37	53	43	2.30039	0.00197652	2.7041
FOSL1	3212	2305	1964	13235	9820	9911	2.13968	0.00199567	2.69991
LIPG	105	163	123	599	585	809	2.3497	0.00200022	2.69892
ZFP36	127	188	196	1045	1469	1592	3.00634	0.00200234	2.69846
SLC7A1	2158	2762	2449	5497	4433	5144	1.03252	0.00200349	2.69821
AL139393.3	28	41	33	120	159	173	2.14775	0.00201781	2.69512
RIMBP3	26	28	20	4	0	6	-2.88753	0.00201873	2.69492
SIAH2	344	511	473	890	803	845	0.934437	0.00202806	2.69292
MSL2	327	404	347	594	553	539	0.645247	0.00202924	2.69267
LINC02605	2	2	2	39	27	43	4.18322	0.00203326	2.69181
MARS2	91	114	87	39	27	29	-1.61997	0.00203382	2.69169
UBTD2	311	453	459	928	862	1062	1.22155	0.00204655	2.68898
DMRT3	16	14	24	41	39	42	1.17585	0.00204769	2.68874
FNIP1	342	402	386	1169	880	1166	1.5085	0.00204795	2.68868
STARD4	529	763	637	1291	1247	1477	1.05755	0.00205798	2.68656
ZNF773	72	88	102	229	194	184	1.21213	0.00206182	2.68575
ZNF627	143	211	226	412	378	381	1.01362	0.00208035	2.68186
PLAUR	1641	2100	1840	3555	3029	3294	0.823695	0.00208037	2.68186
PPTC7	238	318	281	634	550	522	1.02732	0.00208392	2.68112
AGO2	1078	1531	1236	2943	2499	3079	1.14804	0.0020864	2.6806
ZBTB43	233	289	252	750	591	796	1.46518	0.00210943	2.67583
RGS9BP	1	1	2	5	4	5	1.80735	0.00211065	2.67558
RASD1	0	1	0	4	3	4	3.45943	0.00211065	2.67558
TUBB2BP1	0	1	0	3	4	4	3.45943	0.00211065	2.67558
GLUD1P3	13	15	15	9	7	7	-0.902703	0.00211065	2.67558
ANKRD1	10621	21739	17683	71784	85829	104606	2.38953	0.00214664	2.66824
GCH1	27	22	12	197	130	156	2.98514	0.00215119	2.66732
MAP1LC3B2	42	62	63	114	116	134	1.12409	0.00215585	2.66638
SPRY2	495	628	652	3669	4974	5700	3.01446	0.00216091	2.66536
PELI2	52	37	60	153	124	123	1.42469	0.00217384	2.66277
TRIB3	194	208	157	906	648	698	2.01029	0.00217475	2.66259
CSF1	1313	1537	1395	4671	3603	3599	1.48385	0.0021782	2.6619
BMP2	178	252	163	501	437	423	1.19856	0.0021791	2.66172
CLCN6	346	431	427	673	609	628	0.665737	0.00217996	2.66155
AL022328.1	1	1	0	3	3	3	2.16993	0.00219213	2.65913
RPLP0P2	13	10	17	36	37	46	1.57289	0.00221257	2.6551
ETV3	333	464	347	854	822	1020	1.23673	0.00221372	2.65488
RBMXL1	174	174	185	486	363	445	1.27963	0.00221624	2.65438
SESN3	29	31	32	15	20	14	-0.908852	0.00222109	2.65343
IL1R1	77	78	68	195	156	155	1.18209	0.00223638	2.65045
LCMT2	267	313	255	133	159	139	-0.954088	0.00223804	2.65013
FBXO33	255	305	262	393	417	388	0.543418	0.00224188	2.64939
NDUFV2-AS1	5	6	3	13	11	12	1.36257	0.00224331	2.64911
GCNT4	2	2	0	20	14	14	3.58496	0.00224331	2.64911
WFIKKN1	7	8	8	18	17	14	1.09115	0.00225326	2.64719
ODC1	3697	3476	2979	7873	6189	7335	1.07564	0.00226327	2.64526
CYB5D1	202	273	229	394	384	424	0.77179	0.00226709	2.64453
AC010210.1	1	0	2	5	5	5	2.32193	0.00227843	2.64237
FOXP1	722	985	864	2030	1631	1995	1.13745	0.00228214	2.64166
ALKBH4	137	189	154	56	54	50	-1.58496	0.00228576	2.64097
ESM1	52	149	124	679	765	1007	2.91486	0.00228826	2.6405
ARL13B	117	169	169	350	293	353	1.13028	0.00230329	2.63765
HECA	201	280	251	413	413	451	0.802843	0.0023109	2.63622
STX16	944	1097	978	1434	1345	1470	0.493053	0.00231443	2.63556
TRIM39	251	320	297	425	454	454	0.61891	0.00231577	2.63531
CCDC121	15	20	27	44	46	45	1.12262	0.00231617	2.63523
PHLDA2	586	948	872	1869	1600	1727	1.11076	0.00231712	2.63505
MAP1LC3B	1614	2386	2284	4389	4813	5515	1.22773	0.00232554	2.63348
RSRC2	545	714	592	1164	1028	1038	0.803229	0.00232659	2.63328
ICAM5	9	22	29	60	67	71	1.72247	0.00233515	2.63169
ITPRIPL2	823	1218	1051	2123	1876	2201	1.00373	0.00234376	2.63009
CFLAR	539	892	793	1667	1606	1929	1.22591	0.00234928	2.62907
IER5	491	550	507	1559	1147	1322	1.37966	0.00237678	2.62401
SUSD6	381	678	540	1611	1878	2238	1.84061	0.00237866	2.62367
ZNF182	86	93	83	58	42	46	-0.843598	0.00238079	2.62328
MVK	315	388	352	815	643	796	1.09524	0.0023825	2.62297
ZSWIM1	164	206	204	91	98	77	-1.10962	0.00238886	2.62181
SAMD4A	310	466	354	2056	1905	2778	2.57621	0.0023907	2.62147
CHAC2	36	37	38	27	25	21	-0.604591	0.00240994	2.61799
SETD1A	705	774	783	538	430	481	-0.642541	0.00241953	2.61627
ZXDB	182	249	193	448	387	385	0.967263	0.0024658	2.60804
TEF	165	146	148	296	245	256	0.796086	0.00247527	2.60638
CREBZF	285	326	308	389	390	384	0.339714	0.00248036	2.60549
FOXL1	126	144	103	336	257	308	1.27235	0.00248186	2.60522
RSRP1	323	367	317	788	608	722	1.07264	0.0025151	2.59944
TNIP2	325	360	369	609	515	549	0.666563	0.00251556	2.59937
NFATC2	123	230	160	464	547	622	1.67049	0.00252276	2.59812
HERPUD2	341	417	370	641	580	690	0.760561	0.00253514	2.596
PHF12	653	732	776	463	363	385	-0.8355	0.00254201	2.59482
LONRF1	53	69	55	167	141	194	1.50394	0.00254537	2.59425
PPP1R3B	299	590	507	1236	1053	1152	1.30153	0.00255256	2.59302
AC106820.4	12	13	13	8	6	5	-1	0.00255701	2.59227
COX19	138	156	169	347	273	310	1.00622	0.002558	2.5921
PTGS2	58	133	75	1346	1658	2179	4.28429	0.00255879	2.59197
C1orf74	85	91	90	57	36	42	-0.978467	0.00257836	2.58866
KDM7A	46	90	69	311	298	421	2.32895	0.00257882	2.58858
SNX9	1028	1289	1244	2782	2200	2774	1.12303	0.00258824	2.587
TMEM102	89	106	93	56	38	40	-1.10384	0.00258826	2.58699
ARRDC4	107	147	132	520	362	472	1.81055	0.00259013	2.58668
RNF44	232	383	371	849	694	838	1.27191	0.00260681	2.58389
SDE2	283	393	346	565	545	564	0.711904	0.00260751	2.58377
HDX	51	84	68	169	147	187	1.30908	0.00262076	2.58157
ZXDA	55	89	66	166	140	163	1.1592	0.00263263	2.57961
ZBTB3	45	46	51	34	29	32	-0.579892	0.00265981	2.57515
MYC	1185	1618	1421	2327	2307	2201	0.694332	0.00267411	2.57282
FAM83G	552	734	739	1782	1369	1731	1.26955	0.00269775	2.569
LINC00847	114	104	108	86	78	75	-0.447861	0.00270849	2.56727
PXDC1	841	1932	1725	4039	4614	5188	1.62159	0.00271423	2.56635
KLF4	14	19	13	157	121	100	3.03868	0.00271785	2.56577
MEG9	68	48	47	150	143	116	1.32723	0.00272608	2.56446
DYRK1A	741	940	682	1409	1302	1465	0.821502	0.00272674	2.56436
PELI1	53	64	63	121	99	106	0.856875	0.00273743	2.56266
EPC2	254	349	330	688	561	681	1.04865	0.00274196	2.56194
RGS14	59	57	49	85	78	78	0.546567	0.00274605	2.56129
SOCS3	285	268	276	496	483	407	0.741483	0.00275042	2.5606
RAB9A	245	247	226	425	358	368	0.680832	0.00275175	2.56039
C11orf96	0	0	1	228	387	363	9.93369	0.00276063	2.55899
MBD5	318	427	370	586	586	631	0.693356	0.00276605	2.55814
RTL10	539	666	648	347	244	268	-1.10913	0.0027751	2.55672
IRS2	712	1226	1162	2142	2050	2159	1.03472	0.00279548	2.55354
ADAM17	954	1131	1046	1716	1621	1947	0.755007	0.00279905	2.55299
MIR1915HG	22	17	21	40	34	42	0.95109	0.0028021	2.55252
ZNF433	13	19	14	58	59	81	2.10579	0.00280388	2.55224
PPM1D	171	174	162	241	215	221	0.41717	0.00280414	2.5522
ZNF628	144	161	148	115	103	112	-0.457045	0.00282915	2.54834
MBD6	777	800	844	1183	1037	1113	0.461218	0.00283217	2.54788
RBM33	577	615	535	1215	978	1024	0.897448	0.0028534	2.54464
RFFL	376	480	400	938	763	788	0.98673	0.00285846	2.54387
ZFAND5	2297	3255	2797	4754	4531	4936	0.768348	0.00286443	2.54296
ZNF473	142	198	152	345	291	312	0.946229	0.00286547	2.5428
C9orf72	43	50	31	110	94	88	1.23563	0.00286578	2.54276
RAB33B	112	151	124	295	234	274	1.05307	0.00286648	2.54265
AL353625.1	21	33	24	66	53	62	1.21444	0.00286655	2.54264
ATP6V1B2	1459	1711	1530	2683	2282	2656	0.69732	0.00287435	2.54146
USPL1	242	335	311	496	471	483	0.707421	0.00288026	2.54057
FAM102A	502	593	591	1348	1028	1258	1.10795	0.00288926	2.53921
ADAMTS8	0	1	1	4	6	5	2.90689	0.00289001	2.5391
ERFL	7	9	5	20	20	26	1.65208	0.00289796	2.53791
SLC16A13	49	45	66	126	103	126	1.14975	0.00290193	2.53731
ZNF44	56	63	49	243	165	224	1.91146	0.002905	2.53685
KLF13	282	363	351	681	588	746	1.01656	0.00290648	2.53663
CCN1	9807	16094	13940	24882	27772	26642	0.992994	0.00291074	2.536
ZBTB20	156	254	223	456	397	449	1.04045	0.00291579	2.53524
KLF3	359	459	394	1372	1008	1077	1.51213	0.00291592	2.53522
SYT7	11	10	10	27	20	25	1.21573	0.00291877	2.5348
ETS2	462	367	420	3622	2359	2672	2.79243	0.0029195	2.53469
GLIS1	231	253	247	171	125	135	-0.762184	0.00292489	2.53389
AC132872.3	1	5	4	16	12	15	2.10434	0.00293694	2.5321
KBTBD11	141	210	188	310	312	329	0.81916	0.00293875	2.53184
YRDC	257	401	349	636	599	663	0.914416	0.00296429	2.52808
TNFRSF9	13	28	27	238	151	181	3.06736	0.00298542	2.52499
RELB	202	317	276	963	693	793	1.62317	0.00300189	2.5226
EPHA2	4959	7301	6571	11657	10573	11663	0.847878	0.00301113	2.52127
ZNF281	681	1032	887	1695	1824	2099	1.11155	0.00302792	2.51886
ANKLE2	2173	3451	2839	5893	5270	6228	1.0391	0.0030282	2.51882
ATP6V1FNB	12	21	8	75	91	116	2.782	0.00304501	2.51641
SPRY4	243	323	259	716	641	875	1.43587	0.00304639	2.51621
CHORDC1	248	332	301	868	633	776	1.36992	0.00304946	2.51578
ANKRD36C	17	20	17	30	36	38	0.945552	0.00305769	2.51461
UBE2B	225	349	318	600	571	683	1.05553	0.00307002	2.51286
AL731577.2	64	70	61	102	97	116	0.691878	0.00310034	2.50859
IFNGR2	815	1306	1140	2027	1976	2096	0.903258	0.00310068	2.50854
HS3ST3B1	90	128	106	200	193	229	0.940921	0.00310534	2.50789
HES4	88	114	105	372	259	316	1.62513	0.00311783	2.50615
VCPIP1	378	504	427	833	719	869	0.887138	0.00311935	2.50594
SGK1	924	1615	1388	2924	3405	3800	1.36699	0.00312429	2.50525
AC016245.2	0	1	0	8	6	5	4.24793	0.00312559	2.50507
AC099552.1	1	0	0	3	3	4	3.32193	0.00312559	2.50507
AC004832.5	0	1	1	4	4	3	2.45943	0.00312559	2.50507
CD72	0	3	1	7	7	8	2.45943	0.00312559	2.50507
ALOXE3	1	2	2	4	5	5	1.48543	0.00312559	2.50507
C3orf35	5	4	5	1	2	2	-1.48543	0.00312559	2.50507
FP325335.1	3	4	3	0	0	1	-3.32193	0.00312559	2.50507
SPP1	198	225	202	281	262	275	0.388245	0.0031273	2.50483
CTDSPL	516	582	553	424	376	376	-0.489452	0.00314222	2.50276
AHR	2668	3107	2844	4120	3739	4019	0.4627	0.00314911	2.50181
C2orf27A	106	178	152	295	329	364	1.18018	0.00315287	2.50129
CHST3	4263	6544	5945	12440	10371	12479	1.07493	0.00317552	2.49818
CDC37L1	117	187	164	293	346	317	1.0305	0.00317679	2.49801
C5orf51	487	615	583	1069	938	1176	0.917639	0.00318125	2.4974
TMEM225B	3	6	4	12	12	10	1.38702	0.00318481	2.49692
CYTH4	4	5	1	25	17	19	2.60881	0.00319593	2.4954
CFAP57	12	15	14	7	6	8	-0.965235	0.0031982	2.49509
ARL14	2	4	2	9	12	13	2.08746	0.00323325	2.49036
AZIN1	1731	2427	1960	3736	3348	3845	0.837029	0.00323451	2.49019
SLC41A2	86	133	119	295	276	370	1.47717	0.00324239	2.48913
CYTH2	949	1284	1182	2034	1779	1970	0.759933	0.00324363	2.48897
CCL3	1	0	1	41	44	66	6.2384	0.00325136	2.48794
ZNF138	48	43	40	72	67	62	0.617629	0.00327091	2.48533
IL32	70	119	163	324	289	353	1.45645	0.00329227	2.48251
CLDN12	304	358	351	532	494	587	0.671112	0.00329467	2.48219
LACC1	49	45	39	174	118	154	1.74562	0.00330211	2.48121
IRX5	32	30	28	104	74	82	1.53051	0.00330942	2.48025
RSBN1L	261	297	289	191	141	141	-0.840522	0.00332617	2.47806
RAP2C	268	354	302	558	483	508	0.745372	0.0033432	2.47584
ZCCHC8	196	203	215	409	321	382	0.856846	0.00336575	2.47292
HIVEP3	219	323	257	489	452	511	0.861774	0.00337469	2.47177
NR3C1	1289	1769	1376	2962	2622	3260	0.99609	0.00339179	2.46957
CCSER2	954	1380	1085	2292	2183	2698	1.069	0.00339334	2.46937
AC083855.2	16	16	25	37	39	38	1	0.00340276	2.46817
RABGGTB	620	795	628	1234	1060	1183	0.767154	0.00341773	2.46626
HERPUD1	852	1310	1215	3975	2885	3155	1.56835	0.00341801	2.46623
HIPK3	460	660	663	1351	1154	1493	1.16497	0.00343794	2.4637
FBXO30	340	419	345	616	544	630	0.697219	0.0034504	2.46213
GMEB2	362	423	377	578	515	569	0.51631	0.00345188	2.46194
ACAT2	539	450	387	986	824	1047	1.05402	0.00347347	2.45924
AC097359.2	34	49	56	102	92	88	1.02061	0.00347795	2.45868
ZNF800	244	321	283	460	433	499	0.715023	0.00348418	2.4579
PDGFB	66	125	146	376	284	349	1.58211	0.00350801	2.45494
DLGAP1-AS2	18	9	16	66	55	45	1.94877	0.00351338	2.45427
YOD1	184	237	197	638	469	505	1.38317	0.00353073	2.45214
FLNC	10377	13465	11844	23226	19215	23416	0.883979	0.00353961	2.45104
CDKL5	92	115	126	200	179	213	0.830075	0.00359177	2.44469
VPS37A	498	561	577	773	713	801	0.483284	0.00359968	2.44374
ZC3H11B	15	16	14	27	22	26	0.736966	0.00360223	2.44343
AMMECR1L	501	713	573	1229	1017	1175	0.936878	0.00360941	2.44256
VGLL4	1295	1863	1714	2644	2680	2818	0.740869	0.00361053	2.44243
RDH14	279	323	305	215	191	171	-0.652531	0.00364797	2.43795
ELL2	1507	2226	1812	3465	3190	3764	0.909957	0.0036489	2.43784
AC135178.3	0	2	2	16	12	20	3.58496	0.00365026	2.43768
DNAJB9	212	419	370	864	867	1100	1.49987	0.00366177	2.43631
MICA	715	824	794	1377	1128	1308	0.70874	0.00367983	2.43417
ISYNA1	4	7	10	39	28	28	2.17754	0.0036922	2.43272
B4GALT5	1459	1854	1697	3151	2586	3008	0.803648	0.00370128	2.43165
KRTAP2-3	26	12	23	51	53	64	1.46158	0.00370464	2.43125
ZNF516	129	194	179	372	344	446	1.21085	0.00371182	2.43041
HILPDA	121	172	143	54	59	50	-1.41946	0.00372492	2.42888
WSB1	639	1011	922	1611	1612	1852	0.980517	0.00376108	2.42469
N4BP3	0	4	0	134	77	97	6.26679	0.00376654	2.42406
CNOT6LP1	0	2	1	7	5	7	2.66297	0.00377202	2.42343
B4GALT1	4388	6944	6403	10742	10881	12025	0.923921	0.00377803	2.42273
C6orf132	239	346	263	666	531	578	1.06568	0.00378638	2.42178
CHAC1	21	44	24	979	663	595	4.65162	0.00378715	2.42169
CYLD	1096	1362	1279	2375	1947	2380	0.842711	0.00378732	2.42167
SHROOM1	154	146	161	269	229	226	0.651223	0.00379642	2.42063
S1PR2	151	244	225	373	386	410	0.914935	0.00382133	2.41778
ZFAND6	395	457	380	583	546	575	0.467923	0.00382243	2.41766
KANK1	409	414	428	1420	983	1150	1.50596	0.00383288	2.41648
AC005839.1	2	5	4	9	9	10	1.34792	0.00385795	2.41364
L34079.3	6	5	6	13	10	11	1	0.00385795	2.41364
LINC02742	4	5	5	10	10	13	1.23704	0.00386285	2.41309
LINC00997	44	49	42	32	33	32	-0.476903	0.00386285	2.41309
SLC7A11	453	409	295	1387	968	1344	1.67675	0.0038765	2.41156
YWHAG	4141	5431	4738	7745	6999	7868	0.660065	0.00387974	2.4112
PER2	101	134	80	238	203	213	1.05394	0.00389536	2.40945
WBP4	214	262	226	414	346	380	0.699491	0.00389724	2.40924
RASA2	247	402	311	646	582	672	0.984893	0.00390941	2.40789
CLDN14	0	0	3	33	39	56	5.41504	0.00391492	2.40728
RAB23	310	406	398	647	588	707	0.801794	0.00391585	2.40717
VXN	14	12	17	54	64	42	1.89566	0.00393413	2.40515
MEF2D	939	1549	1440	2417	2558	2758	0.977233	0.00394296	2.40418
AC107959.1	9	21	15	70	48	57	1.95936	0.00396711	2.40153
SPATA5L1	116	156	136	287	229	256	0.920032	0.00397297	2.40089
DNAAF2	144	170	159	103	96	113	-0.600294	0.00398159	2.39994
HMOX1	165	151	119	1251	1177	1857	3.30021	0.00401281	2.39655
RAPGEF2	1049	1401	1212	2006	1809	1928	0.649173	0.00402139	2.39562
EIF3J	887	1142	1033	1476	1438	1491	0.524668	0.00406151	2.39131
TRHDE-AS1	64	83	81	40	33	26	-1.20353	0.00406511	2.39093
FOXL2	44	43	40	27	23	16	-0.944291	0.00406592	2.39084
AC010186.3	16	13	20	45	37	52	1.45138	0.00407249	2.39014
ZNF295-AS1	2	4	6	41	50	69	3.73697	0.0040781	2.38954
IMP3	472	589	596	320	256	235	-1.0308	0.00408396	2.38892
RNF38	344	464	386	711	687	839	0.905762	0.00410595	2.38659
ZBTB5	212	339	299	688	607	545	1.11417	0.00410753	2.38642
TBILA	12	19	15	40	31	34	1.19068	0.00412887	2.38417
PPP1R18	2734	3677	3513	5784	5174	6150	0.785677	0.00417065	2.3798
OTX2	262	343	377	116	133	88	-1.54297	0.00417233	2.37962
NEXN-AS1	11	16	16	81	60	98	2.4746	0.00418653	2.37815
VEGFA	3488	4840	4447	7283	8300	9183	0.955038	0.00418835	2.37796
NFKBIB	238	325	278	651	499	583	1.04309	0.00420297	2.37644
CYP27A1	41	40	40	30	33	27	-0.42701	0.00423684	2.37296
CCDC96	34	23	30	11	7	9	-1.68806	0.0042449	2.37213
SLC2A3	289	504	475	913	918	1120	1.21865	0.00425013	2.3716
SLC4A7	1331	1557	1403	2086	1876	2127	0.504891	0.00425221	2.37139
ATAD2B	139	165	151	201	202	219	0.451048	0.00425987	2.3706
HSPA8	25181	35786	32338	57069	49420	56411	0.80396	0.00426841	2.36973
AL162377.1	5	6	6	35	28	46	2.68072	0.00428053	2.3685
NGFR	0	6	10	185	107	131	4.72451	0.00429726	2.36681
INO80D	219	288	217	720	514	608	1.34721	0.00432059	2.36446
CTH	22	24	16	81	54	71	1.7323	0.00432462	2.36405
SLC43A2	314	404	370	756	594	733	0.936984	0.0043439	2.36212
IL11	328	488	446	1396	1252	1846	1.83229	0.00434737	2.36177
MOCS3	172	186	181	259	232	274	0.505174	0.00435091	2.36142
HNRNPKP2	0	2	2	6	5	6	2.08746	0.00435682	2.36083
AC011497.2	13	18	28	58	46	57	1.44827	0.00436171	2.36034
SH3TC1	71	108	110	221	177	208	1.06825	0.00437541	2.35898
ACSL3	1369	1757	1563	2799	2356	2825	0.767108	0.00437956	2.35857
TMEM39A	479	723	684	1185	1090	1300	0.922614	0.00438659	2.35787
NR4A2	27	48	32	146	217	237	2.48735	0.00439134	2.3574
TBX20	2	6	2	14	11	14	1.96347	0.00439466	2.35707
BRSK1	189	255	274	392	386	389	0.700749	0.00440148	2.3564
BTN2A2	180	207	191	443	331	383	1.00125	0.00440387	2.35617
DEDD2	268	356	356	977	702	795	1.33599	0.00440581	2.35597
SCD	12128	15804	15426	25905	21915	25523	0.758361	0.00441897	2.35468
MARF1	944	1129	1089	734	640	701	-0.607726	0.00442298	2.35428
EHD1	2479	3210	2850	7333	5488	5971	1.13798	0.0044512	2.35152
COQ10B	275	426	371	697	633	771	0.970771	0.00448492	2.34825
SIX3	1075	1354	1251	764	718	626	-0.803831	0.0045114	2.34569
FAM118A	139	163	175	263	235	231	0.61193	0.0045323	2.34368
NMRAL2P	1	2	3	12	9	8	2.27302	0.00453542	2.34338
BAG4	358	414	359	235	206	263	-0.683952	0.00454039	2.34291
ARID4B	485	593	511	763	713	786	0.50948	0.00454254	2.3427
FOXS1	215	335	341	59	58	66	-2.28358	0.0045637	2.34068
TNIP1	2265	3168	2916	5170	4403	4772	0.780873	0.00457638	2.33948
KCNJ2	91	103	102	60	72	55	-0.662559	0.00459643	2.33758
MTF1	381	472	473	747	637	699	0.651582	0.0046141	2.33591
C15orf39	608	684	551	1474	1099	1249	1.05227	0.00465982	2.33163
TENM3-AS1	131	134	137	319	256	364	1.22393	0.00466295	2.33134
SLC2A6	100	103	148	563	364	447	1.96884	0.00466359	2.33128
SLC28A3	12	13	16	48	33	48	1.65368	0.00466925	2.33075
TLE1	419	502	455	1101	807	986	1.07258	0.00469661	2.32822
CU633906.5	15	22	21	7	7	5	-1.61005	0.0047155	2.32647
C2orf42	119	131	159	204	206	202	0.581431	0.00473308	2.32486
PXMP4	86	88	86	65	47	58	-0.612977	0.00473961	2.32426
FUT4	59	79	67	149	119	157	1.05184	0.00478673	2.31996
RASSF8	831	1138	962	1539	1479	1652	0.67203	0.00479774	2.31896
INHBE	0	1	1	3	3	4	2.32193	0.00481268	2.31761
AC120053.1	3	4	3	1	0	1	-2.32193	0.00481268	2.31761
AC017104.1	5	4	4	1	2	2	-1.37851	0.00481268	2.31761
WBP2	1444	1655	1651	2855	2290	2711	0.725867	0.00483638	2.31548
ESCO1	205	296	278	455	410	432	0.735483	0.00491815	2.3082
GAB2	248	316	254	512	430	442	0.758671	0.00492206	2.30785
SPTBN4	8	6	9	16	13	15	0.93587	0.00495204	2.30522
NBPF19	58	162	185	375	354	348	1.41102	0.00495454	2.305
C17orf80	276	338	333	210	187	197	-0.672901	0.00495693	2.30479
YPEL2	76	122	132	263	273	353	1.42972	0.00500274	2.30079
P2RY1	20	23	16	38	39	32	0.885541	0.005024	2.29895
MFHAS1	341	446	400	1047	749	934	1.20158	0.00502672	2.29871
HMBOX1	69	128	124	229	212	212	1.02451	0.005083	2.29388
ZSWIM3	59	77	83	31	29	35	-1.20493	0.00509754	2.29264
KRT34	6	5	0	37	22	33	3.06413	0.00511301	2.29132
TAB2	1495	1736	1589	2827	2294	2527	0.666049	0.00511418	2.29122
HDAC9	339	362	338	1018	696	924	1.34425	0.00513421	2.28953
CCN2	13760	30207	25535	49884	59273	61774	1.29829	0.00513971	2.28906
PLEKHO2	357	420	407	876	666	727	0.938388	0.00518401	2.28533
ZNF622	293	447	398	653	641	730	0.830709	0.00518725	2.28506
AP000941.1	1	3	2	10	14	17	2.77259	0.00521092	2.28309
MOAP1	265	377	387	609	548	620	0.788201	0.00521478	2.28276
ZNF140	69	90	74	191	141	163	1.0871	0.00522589	2.28184
AC027237.3	51	82	94	154	144	147	0.971113	0.0052364	2.28097
AKIRIN2	417	558	481	792	705	753	0.627915	0.00524037	2.28064
SNIP1	258	364	322	547	489	579	0.774675	0.00526883	2.27829
VGF	8	9	9	39	25	30	1.85415	0.00527418	2.27785
TGDS	75	98	79	158	129	149	0.790904	0.00528348	2.27708
FAM241A	33	63	34	104	138	118	1.46949	0.00531845	2.27421
ZNF274	183	181	139	507	349	438	1.36321	0.0053241	2.27375
SERPINB7	42	41	38	34	33	32	-0.289507	0.00532813	2.27343
AL096865.1	8	7	6	3	3	4	-1.07039	0.00532813	2.27343
AC138028.6	11	41	25	100	75	100	1.8365	0.00536527	2.27041
DENND4A	361	508	459	689	679	743	0.668671	0.00537355	2.26974
SOX5	92	131	123	196	177	189	0.699798	0.00537591	2.26955
NAV3	522	651	480	1303	975	1250	1.09376	0.00537893	2.2693
FAM217B	199	220	205	155	121	113	-0.681776	0.00541996	2.266
HS3ST3A1	321	372	305	561	469	552	0.664638	0.0054269	2.26545
AC010733.2	0	15	9	130	228	239	4.63662	0.00543497	2.2648
ZBTB38	3295	3705	3307	6146	4904	5539	0.686602	0.00544553	2.26396
CEP120	195	208	174	305	259	285	0.557193	0.00545945	2.26285
AL355304.1	0	1	6	17	22	28	3.25873	0.00557195	2.25399
ZFP28	115	138	140	261	204	259	0.88146	0.00558573	2.25292
AC004854.2	18	19	15	38	40	53	1.33298	0.00559565	2.25215
WDR89	153	174	139	239	211	228	0.540955	0.00560423	2.25148
MED13	1101	1537	1375	2323	2012	2227	0.709454	0.00564498	2.24834
GPR68	84	126	95	288	234	346	1.50889	0.0056593	2.24724
MROH6	35	41	28	60	54	57	0.717413	0.00569595	2.24443
ARMC7	133	166	184	85	72	63	-1.13452	0.00570062	2.24408
ZNF91	154	237	230	358	343	374	0.791671	0.00570604	2.24367
AC022415.1	8	9	6	23	20	30	1.66626	0.00572401	2.2423
AUXG01000058.1	56	102	73	2	6	5	-4.15131	0.0057314	2.24174
MAP3K2	614	861	762	1142	1124	1215	0.637937	0.00574117	2.241
MEX3C	674	988	975	1591	1434	1452	0.763635	0.00575632	2.23986
ADAMTS6	347	455	412	702	589	656	0.681484	0.00576484	2.23921
ZNF212	109	161	131	277	225	283	0.96909	0.00577177	2.23869
FAM160A2	238	301	305	469	403	438	0.634252	0.0057762	2.23836
CBX8	133	182	152	82	69	56	-1.17379	0.00577968	2.2381
PPARG	166	141	141	250	213	217	0.602036	0.00578221	2.23791
TMEM119	1	0	0	5	5	8	4.16993	0.00578456	2.23773
AC012181.1	4	4	1	9	9	8	1.53051	0.00578456	2.23773
PANX1	563	833	713	1168	1109	1247	0.740655	0.00578484	2.23771
LHX9	38	40	49	18	20	25	-1.0114	0.00580436	2.23625
AL353622.1	5	5	3	0	1	0	-3.70044	0.00582069	2.23503
ZNF615	75	97	88	54	41	41	-0.934905	0.00586207	2.23195
RNF166	139	164	156	342	310	251	0.976232	0.00587729	2.23082
PLEKHM3	267	314	322	423	395	445	0.484057	0.00589753	2.22933
AL590666.2	1	2	2	6	9	10	2.32193	0.00590453	2.22881
DUSP4	1285	1874	1660	714	689	615	-1.25581	0.00590554	2.22874
ETNK1	534	792	641	1104	1028	1093	0.713302	0.00591951	2.22771
CPT1C	202	213	211	172	165	144	-0.380126	0.00596403	2.22446
LINC01465	21	19	16	27	26	28	0.532495	0.00596519	2.22438
AC018638.4	63	76	81	103	101	108	0.504043	0.0059676	2.2242
LAMA3	10	22	22	80	96	132	2.5119	0.00597007	2.22402
RASEF	25	13	18	123	90	157	2.72403	0.00598191	2.22316
RAP1B	1682	2147	1985	3256	2833	3491	0.720495	0.00599661	2.22209
CARS	615	826	690	1279	1063	1247	0.752051	0.0060027	2.22165
NANP	141	197	150	305	261	271	0.778346	0.00601918	2.22046
DDIT4L	49	66	57	21	27	9	-1.59337	0.00604536	2.21858
IL4I1	3	4	3	10	7	8	1.32193	0.00607361	2.21655
IFNGR1	257	297	273	458	437	559	0.814068	0.00607445	2.21649
ZNF644	655	754	689	1183	963	1064	0.613559	0.00607509	2.21645
ZBTB2	282	273	222	407	364	371	0.555576	0.00607616	2.21637
BTBD19	115	208	211	335	365	384	1.02145	0.0060862	2.21565
TMEM41B	345	433	386	575	534	620	0.570847	0.00609066	2.21534
ARHGAP5	765	1092	915	1741	1492	1877	0.882396	0.00609516	2.21501
SELPLG	92	118	132	231	195	257	0.997889	0.0060988	2.21476
NR2F2	3487	4648	4281	2358	2269	2329	-0.835871	0.00610172	2.21455
RNF103	402	533	519	727	689	735	0.56498	0.00611258	2.21378
AC005519.1	11	12	13	6	8	8	-0.710493	0.00612226	2.21309
CEP112	106	129	122	161	164	182	0.506062	0.0061281	2.21267
DAB2	2318	3084	2460	4618	5133	6144	1.0156	0.00612962	2.21257
KLF2	541	750	624	300	311	330	-1.02508	0.00613284	2.21234
ZNF169	25	22	31	13	9	9	-1.33121	0.00613715	2.21203
AC073072.1	19	29	22	47	39	47	0.925999	0.00621921	2.20626
SEC24A	876	1314	1219	2120	1818	2139	0.834011	0.00622346	2.20597
TXNRD1	5708	6560	5531	10985	8702	10872	0.779801	0.00623577	2.20511
SH3RF2	900	1320	1200	2076	1828	2238	0.844712	0.00627655	2.20228
GEMIN6	128	158	135	94	72	73	-0.81681	0.00629928	2.20071
MYOSLID	30	32	43	56	65	67	0.840343	0.00629986	2.20067
TAF7	985	1195	1061	1501	1383	1483	0.430204	0.00630698	2.20018
SPAG9	1743	2167	1891	3571	2858	3554	0.783172	0.00631387	2.1997
ERVK13-1	104	122	122	83	82	71	-0.5603	0.00634399	2.19764
PEX11A	36	36	35	27	24	19	-0.612184	0.0063724	2.1957
ZCCHC14	570	709	631	1646	1152	1459	1.15626	0.00637276	2.19567
ID1	756	1033	965	467	502	408	-1	0.00637827	2.1953
KHDC1	38	34	41	26	23	19	-0.732716	0.0063787	2.19527
ZNF562	395	518	441	679	625	670	0.543894	0.00641995	2.19247
P2RY11	67	76	85	225	165	164	1.28085	0.00643846	2.19122
RNASEL	35	37	35	27	30	25	-0.383915	0.00645896	2.18984
OTUD7B	557	783	655	1148	997	1080	0.69291	0.00646191	2.18964
AC069185.1	0	3	5	12	16	19	2.55459	0.00646456	2.18946
PRDM2	371	541	514	814	761	905	0.798366	0.00647879	2.18851
BEST3	2	9	13	25	26	24	1.64386	0.0064931	2.18755
SERPINA1	9	7	9	20	16	15	1.02857	0.00651615	2.18601
SERPINE1	60917	101785	81900	145101	140211	154465	0.846336	0.00652901	2.18515
CEP295NL	1	1	1	3	4	5	2	0.00653338	2.18486
LTA	1	1	1	3	4	5	2	0.00653338	2.18486
TEX19	0	1	2	4	4	4	2	0.00653338	2.18486
MAT2A	2764	2731	2336	1851	1396	1394	-0.754761	0.00657038	2.18241
AC016999.1	3	2	3	21	37	25	3.37504	0.00657071	2.18239
SESN2	147	204	218	2178	1276	1442	3.1051	0.00657088	2.18238
ZNF658	83	107	87	53	30	33	-1.25576	0.00659373	2.18087
MTURN	150	188	204	284	276	325	0.707385	0.00659669	2.18067
TIAM2	63	91	76	195	151	149	1.10579	0.00660555	2.18009
SS18L1	197	221	218	363	309	403	0.757238	0.00661715	2.17933
CDK17	574	558	542	1008	784	896	0.683234	0.00663117	2.17841
RB1CC1	712	1017	927	1541	1337	1551	0.737726	0.00663416	2.17821
GAS2L3	211	84	91	665	423	559	2.09317	0.00664128	2.17775
MDM2	1288	1630	1329	2595	2107	2307	0.722765	0.00664197	2.1777
GLI2	233	260	255	163	100	154	-0.842991	0.00666074	2.17648
THAP6	130	162	148	199	198	218	0.483083	0.00672699	2.17218
BRD4	1770	2324	2077	3450	2921	3230	0.63768	0.00672731	2.17216
NIFK	399	580	509	776	784	873	0.709362	0.00673645	2.17157
SETD5	1615	2285	2003	3239	2911	3093	0.646913	0.00674123	2.17126
INAFM1	66	97	88	155	131	143	0.77329	0.00674839	2.1708
TAP1	494	548	452	947	740	828	0.751378	0.00675086	2.17064
IQCN	25	42	29	65	63	79	1.10852	0.00675612	2.1703
ZNF767P	70	100	99	38	37	41	-1.21348	0.00676339	2.16984
DYRK2	626	843	798	1371	1161	1469	0.819576	0.00677273	2.16924
NAPA-AS1	13	14	17	22	21	24	0.606658	0.0067774	2.16894
TAF9	707	865	722	1121	1014	1137	0.512307	0.00680211	2.16736
PITPNB	902	1201	1005	1704	1475	1668	0.641106	0.00681674	2.16642
RGS3	1311	1779	1659	2715	2303	2619	0.685382	0.00682871	2.16566
KIF21A	236	251	241	378	310	353	0.51596	0.00684287	2.16476
GJC1	1084	1067	941	2133	1611	2146	0.929727	0.00684931	2.16435
HS6ST1	330	343	342	272	218	262	-0.432675	0.00686022	2.16366
ZNF316	400	598	551	909	801	900	0.752713	0.00686822	2.16316
KRCC1	260	327	344	434	473	488	0.583412	0.00693855	2.15873
SPEN	1670	2399	2026	3221	3044	3380	0.662155	0.00695397	2.15777
RASGEF1B	0	1	1	15	9	9	4.04439	0.0070003	2.15488
AL606834.1	1	1	0	11	20	13	4.45943	0.00701554	2.15394
AC132872.4	24	56	58	113	126	156	1.51718	0.0070395	2.15246
SKIL	837	1534	1270	2294	2310	2679	1.0002	0.00707659	2.15018
HSPA1L	32	43	39	99	72	105	1.27563	0.00711837	2.14762
AL137782.1	23	32	39	62	84	87	1.3096	0.00713637	2.14652
MRM2	308	334	326	252	185	214	-0.57235	0.00716173	2.14498
UBN2	195	241	210	331	291	300	0.513233	0.00716682	2.14467
ITSN2	427	579	500	929	751	910	0.78223	0.00720992	2.14207
SLC16A9	1	2	5	19	15	26	2.90689	0.0072276	2.14101
AP000892.4	6	24	17	65	113	99	2.55915	0.00723537	2.14054
ZNF2	104	137	124	75	58	51	-0.988191	0.00724487	2.13997
AC144831.1	8	37	42	80	87	97	1.60145	0.00724708	2.13984
PDCD7	277	327	238	475	443	409	0.656276	0.00725249	2.13951
CCNT1	513	697	636	1005	879	949	0.617928	0.00726805	2.13858
ZNF746	300	332	325	457	402	405	0.401406	0.00730867	2.13616
CSRNP3	94	104	68	154	149	180	0.860597	0.00737429	2.13228
MAML3	152	211	217	295	311	296	0.637075	0.0073778	2.13207
ZNF808	44	41	56	100	76	91	0.921145	0.00738556	2.13162
KMT2C	700	965	838	1301	1195	1351	0.620076	0.0073956	2.13103
OGA	1591	2437	2002	3580	3143	3557	0.76961	0.00741499	2.12989
AL031985.3	34	57	39	77	88	94	0.99444	0.00741812	2.12971
FNIP2	631	1032	813	1565	1531	1914	1.0168	0.00743479	2.12873
FASN	4741	5933	5584	10221	7977	9155	0.750549	0.00744336	2.12823
ZC2HC1A	122	141	153	208	200	183	0.506575	0.00745802	2.12738
RRAD	25	24	29	240	142	156	2.78606	0.00746697	2.12686
ZNF317	378	484	419	671	638	785	0.708991	0.00748003	2.1261
RPARP-AS1	88	86	81	66	50	48	-0.636801	0.00748084	2.12605
AC008687.6	1	1	1	5	5	3	2.11548	0.00749043	2.12549
TMEM121B	4	3	2	6	6	7	1.078	0.00749043	2.12549
AC009163.5	0	2	0	4	4	4	2.58496	0.00749043	2.12549
AC092718.8	0	0	1	2	2	2	2.58496	0.00749043	2.12549
AKR1C1	1	0	0	2	2	2	2.58496	0.00749043	2.12549
FAM228B	73	92	78	115	108	120	0.497252	0.00749043	2.12549
AC087482.1	2	2	2	1	0	0	-2.58496	0.00749043	2.12549
LINC02021	2	2	2	1	0	0	-2.58496	0.00749043	2.12549
MAP10	2	2	2	0	1	0	-2.58496	0.00749043	2.12549
FOXA1	56	78	44	120	111	107	0.925146	0.00750338	2.12474
LRRC8B	38	51	52	141	102	159	1.5115	0.00751554	2.12404
PIGP	118	125	117	152	137	148	0.279636	0.00753741	2.12278
BMF	658	695	744	584	561	549	-0.307893	0.00756325	2.12129
AC067852.2	266	343	345	184	149	189	-0.869939	0.00757409	2.12067
AMIGO2	3555	5779	5344	9445	8416	10557	0.95315	0.00758908	2.11981
PEX11B	404	458	441	340	285	264	-0.551582	0.00759148	2.11967
RTN4R	10	3	6	19	16	17	1.45251	0.0076247	2.11778
UVSSA	158	181	166	247	212	247	0.483385	0.0076382	2.11701
CAAP1	181	218	190	283	259	256	0.438121	0.00769435	2.11383
PLK2	9332	15128	13064	4293	4111	3793	-1.62129	0.00771086	2.1129
CYTOR	453	777	704	1346	1451	1851	1.26502	0.0077186	2.11246
MAST4	796	1094	979	2028	1564	1697	0.882447	0.00776233	2.11001
SLC22A23	19	23	22	31	33	28	0.523562	0.0077626	2.10999
MRPL45P2	10	12	9	18	23	18	0.928447	0.0077626	2.10999
HIF1A-AS3	12	11	11	5	7	8	-0.765535	0.0077626	2.10999
AP000781.2	0	1	0	3	2	3	3	0.0077626	2.10999
AP001528.2	3	2	3	1	0	0	-3	0.0077626	2.10999
SPATA7	76	84	77	65	55	55	-0.437532	0.00777151	2.10949
RNF6	596	742	690	1225	966	1122	0.708081	0.00777156	2.10949
PIP4P1	306	278	286	542	412	512	0.752798	0.0077866	2.10865
RBM47	25	14	11	45	37	40	1.28688	0.00778904	2.10852
CLP1	132	195	184	77	73	72	-1.20276	0.00779871	2.10798
UBE2D3	2784	3579	3009	4542	4209	4665	0.517526	0.00782929	2.10628
INTS5	459	576	539	364	289	315	-0.701357	0.00784572	2.10537
AC025171.2	10	14	9	21	21	18	0.862496	0.00787564	2.10371
ATF2	515	623	579	938	791	993	0.664777	0.00787637	2.10367
IFRD1	216	308	274	897	635	629	1.43724	0.00792885	2.10079
RNF213-AS1	24	22	19	15	14	14	-0.596103	0.00793309	2.10056
EHBP1	487	623	567	879	754	844	0.562711	0.00795674	2.09926
CCDC82	255	294	298	412	357	408	0.47468	0.00797662	2.09818
FRS2	419	623	557	1001	883	1148	0.9231	0.00802092	2.09578
ARL4D	106	109	92	503	334	325	1.9203	0.00802693	2.09545
SGMS1	128	128	143	252	191	226	0.745617	0.0080429	2.09459
AC107871.1	31	29	24	12	7	16	-1.26303	0.00804399	2.09453
KLF12	650	934	846	1247	1194	1295	0.620538	0.00804926	2.09424
SCAT8	1	2	3	5	7	6	1.58496	0.00804989	2.09421
GVQW3	29	30	22	15	8	10	-1.29546	0.00804989	2.09421
CRY1	199	325	300	555	457	515	0.889984	0.00807948	2.09262
GLIS3	391	650	600	942	916	990	0.795374	0.00808657	2.09224
TOB2	852	1225	979	2066	1624	2073	0.915175	0.00809947	2.09154
SLC25A32	344	525	426	708	673	753	0.720608	0.00811665	2.09062
RBM15	156	211	195	353	280	320	0.761906	0.00813896	2.08943
PTPRR	27	30	32	56	49	43	0.73372	0.00814372	2.08918
GOLGA8G	16	14	11	26	32	38	1.22741	0.0081579	2.08842
CSTF1	436	551	436	298	208	218	-0.974874	0.00816618	2.08798
TENT4A	485	674	598	930	835	952	0.6289	0.00817275	2.08763
ZNF784	57	60	67	41	30	42	-0.703383	0.00818241	2.08712
MAPK1IP1L	1460	1866	1671	2867	2328	2680	0.656218	0.00818448	2.08701
DNAJB2	842	1268	1185	1946	1724	2092	0.806291	0.00818621	2.08692
AC025423.2	72	78	65	123	98	115	0.644125	0.00818873	2.08678
AC242376.2	30	37	22	10	7	7	-1.89077	0.00820809	2.08576
ZMIZ1-AS1	63	62	63	134	101	105	0.854802	0.00821735	2.08527
MT2A	9118	9653	8688	17523	13374	14798	0.734757	0.00823336	2.08442
BNIP1	107	129	110	179	152	167	0.525374	0.00824703	2.0837
UBAP1L	24	29	32	17	13	10	-1.08746	0.00832449	2.07964
ZNF8	175	250	208	107	96	109	-1.02066	0.00835772	2.07791
PGM2L1	323	428	368	596	515	590	0.604173	0.00837606	2.07696
SPRY1	80	149	141	9	23	16	-2.94642	0.00837978	2.07677
ZBED9	15	16	13	40	27	33	1.18442	0.00841433	2.07498
RFX3	91	142	122	248	198	213	0.892459	0.00844091	2.07361
CELSR3	74	88	87	158	121	156	0.80487	0.0084516	2.07306
SGMS2	786	1142	918	1444	1455	1580	0.654241	0.00845876	2.07269
EIF4ENIF1	356	433	441	261	216	278	-0.70411	0.00848665	2.07126
TUBB2B	54	92	101	296	191	285	1.64409	0.00851569	2.06978
AL135925.1	43	69	55	99	90	93	0.755847	0.00856906	2.06707
MAK	1	3	0	6	9	7	2.45943	0.00858092	2.06647
FAM167B	3	5	2	8	9	11	1.48543	0.00858092	2.06647
GBP1	724	937	928	2083	1496	1692	1.02568	0.00861249	2.06487
C3orf62	75	80	93	49	51	59	-0.641313	0.00861322	2.06483
CEBPB-AS1	7	8	2	14	16	15	1.40439	0.00863579	2.0637
ATOH8	742	686	752	545	372	365	-0.765932	0.00864159	2.06341
ZNF674	51	65	37	102	88	109	0.966614	0.00874375	2.0583
ERICD	23	38	41	59	69	64	0.912537	0.00875342	2.05782
AL360270.3	9	3	0	19	16	17	2.11548	0.00876966	2.05702
CDK9	573	674	649	492	407	425	-0.518056	0.00877577	2.05671
ZNF174	119	139	118	80	39	40	-1.24171	0.00878349	2.05633
INSR	222	247	228	372	300	356	0.56061	0.00878794	2.05611
KBTBD3	19	26	27	10	6	12	-1.36257	0.00882408	2.05433
LARP6	707	926	930	1255	1178	1235	0.51716	0.00883357	2.05386
GDNF	21	38	23	67	55	76	1.2718	0.00885584	2.05277
ELOA-AS1	21	22	22	14	8	14	-0.852443	0.00885584	2.05277
AL031666.2	0	0	3	8	14	10	3.41504	0.00885584	2.05277
AC040160.1	4	7	7	19	13	15	1.38466	0.00885584	2.05277
PNRC1	332	584	610	1025	908	951	0.918316	0.00887581	2.05179
B3GNT2	190	274	245	402	349	417	0.720183	0.00889102	2.05105
OTUD4	1097	1412	1227	2213	1767	2177	0.720733	0.00894395	2.04847
WWC2-AS2	11	8	10	17	17	14	0.726982	0.0089709	2.04716
AC104794.3	5	5	2	24	15	16	2.1964	0.00898044	2.0467
TMEM41A	262	297	266	226	220	217	-0.315385	0.0089821	2.04662
RELA	1121	1590	1500	2389	2042	2333	0.683714	0.0090299	2.04432
ZNF101	84	89	66	157	139	121	0.803037	0.00904606	2.04354
TTC30B	107	134	78	35	24	25	-1.9251	0.00907586	2.04211
RRS1	471	634	537	339	311	286	-0.810874	0.00910226	2.04085
GNE	457	614	477	889	745	832	0.671767	0.00911203	2.04038
MTMR3	503	781	685	1082	1035	1199	0.751981	0.00912575	2.03973
AL049840.4	51	56	53	81	67	73	0.465974	0.0091694	2.03766
ATP23	32	28	30	24	24	25	-0.302029	0.00920589	2.03593
DEC1	1	0	0	4	8	6	4.16993	0.00920589	2.03593
GSX2	3	3	6	11	9	9	1.27302	0.00920589	2.03593
ERCC6	2808	3518	3253	2296	2116	2011	-0.576628	0.00922228	2.03516
ASNS	143	192	169	623	381	508	1.58496	0.00922581	2.035
STBD1	154	217	229	441	332	445	1.02148	0.00922648	2.03496
MYB	42	29	29	108	75	78	1.38405	0.00923349	2.03463
AKAP12	3722	6529	4541	9065	8603	9640	0.884507	0.00923836	2.0344
ZNF410	456	556	536	751	658	746	0.477282	0.00923998	2.03433
SYDE2	48	91	59	159	143	125	1.10874	0.00924718	2.03399
MAML2	611	885	802	1195	1198	1402	0.723721	0.00931016	2.03104
ZSCAN2	89	104	95	70	59	47	-0.710493	0.00931244	2.03094
ZNF879	12	12	13	5	3	8	-1.20945	0.00933785	2.02975
KRIT1	304	325	334	471	393	446	0.443959	0.00936549	2.02847
ZFHX3	432	590	547	881	741	882	0.674389	0.0093841	2.02761
ZNF546	38	32	31	80	61	59	0.985645	0.00939318	2.02719
ZNF584	198	249	224	154	107	106	-0.870533	0.00940314	2.02673
ZNF571	18	21	14	7	7	9	-1.20436	0.00941116	2.02636
SNHG17	172	211	197	243	267	270	0.427421	0.00946317	2.02396
MAB21L2	971	1418	1396	543	606	580	-1.13036	0.00948756	2.02285
CCDC87	10	16	15	5	5	5	-1.45066	0.00952018	2.02136
MMP9	2	2	1	12	9	17	2.926	0.0095403	2.02044
KDM2A	1520	2206	2019	3449	2880	3102	0.715104	0.0095456	2.0202
CD70	112	96	98	226	161	191	0.917538	0.00957023	2.01908
PTPDC1	69	83	75	158	120	125	0.828088	0.00959611	2.0179
TFE3	1666	2064	1909	2891	2455	2684	0.509961	0.00960036	2.01771
EIF5A2	288	318	319	422	379	452	0.437861	0.00964271	2.0158
NFATC1	4	7	3	25	17	31	2.38247	0.00966253	2.01491
AMBRA1	475	595	538	824	710	747	0.504399	0.00966858	2.01464
C1QTNF3	11	7	9	3	4	2	-1.58496	0.00967895	2.01417
RHEB	1132	1243	1180	1834	1488	1734	0.508147	0.00969628	2.0134
SIK2	705	814	800	1113	955	1096	0.448247	0.00971015	2.01277
SCN2A	89	110	114	71	64	58	-0.697562	0.00971261	2.01266
BRAF	324	429	410	589	531	619	0.580407	0.0097173	2.01245
CFB	38	32	24	50	50	55	0.721536	0.00975046	2.01097
MT-RNR2	14319	22628	21186	34293	33797	42265	0.924723	0.00976352	2.01039
TNKS1BP1	2474	3783	3425	5523	4870	5592	0.723342	0.00977055	2.01008
SMAD1	204	266	254	478	364	411	0.791325	0.00985529	2.00633
TUT7	348	496	457	667	626	712	0.623981	0.00986932	2.00571
MSANTD4	316	428	353	593	520	535	0.587153	0.00988602	2.00498
AGAP6	103	125	116	80	48	55	-0.910565	0.00990345	2.00421
TIMP3	30	38	29	74	56	57	0.946982	0.00990412	2.00418
SH3BP5-AS1	48	62	63	32	34	37	-0.748128	0.00991335	2.00378
IQCD	32	31	21	44	44	48	0.695145	0.00992385	2.00332
JAG1	1070	2085	1777	2998	3154	3580	0.980564	0.00996535	2.00151
ZNF419	102	115	125	167	146	154	0.449426	0.00997394	2.00113
LRRC49	142	111	102	255	189	223	0.909868	0.00998793	2.00052
PDE7A	124	118	126	193	155	188	0.542527	0.00999394	2.00026
CNOT4	336	444	388	678	546	628	0.665044	0.0100039	1.99983
SLC25A34	5	13	8	37	24	40	1.95777	0.0100419	1.99818
ZNF24	816	986	861	1219	1103	1205	0.405389	0.0100429	1.99814
AC107068.1	30	30	43	15	9	14	-1.43857	0.0100597	1.99741
ID3	2341	3135	3061	3954	4027	4086	0.499266	0.0100718	1.99689
ZNF823	34	30	34	71	51	72	0.985203	0.0100893	1.99614
RALGAPA1	308	343	349	553	441	487	0.566572	0.0101027	1.99556
AVL9	582	773	616	1080	914	1054	0.628935	0.0101077	1.99535
SHOX2	197	201	208	240	221	234	0.197695	0.0101082	1.99533
NCBP2AS2	119	144	133	101	83	84	-0.563267	0.0101143	1.99506
SESTD1	321	349	321	276	223	244	-0.415523	0.0101171	1.99495
RAPGEFL1	54	63	52	41	41	37	-0.506062	0.0101566	1.99325
ZCCHC9	166	156	177	262	212	241	0.518903	0.0101659	1.99285
IL7R	85	123	120	298	206	313	1.31664	0.0101966	1.99155
RNF217	290	431	376	549	594	653	0.711224	0.0101979	1.99149
ZNF438	72	68	58	98	92	85	0.473931	0.0102052	1.99118
ZNF658B	38	40	44	31	22	23	-0.68281	0.0102053	1.99118
NBPF26	236	279	264	478	366	413	0.690289	0.0102249	1.99034
USP30	150	194	199	115	106	102	-0.749418	0.0102343	1.98994
ASB1	1454	2128	1702	2838	2573	2890	0.651655	0.0102407	1.98967
NRAV	292	338	321	426	394	464	0.433128	0.0102523	1.98918
FZD7	168	261	218	436	346	455	0.935008	0.0102634	1.98871
HECTD2	166	262	261	434	373	473	0.893568	0.0102798	1.98802
RSBN1	190	247	195	135	109	117	-0.807926	0.0102837	1.98785
NSUN5	172	164	135	230	209	211	0.464713	0.0103283	1.98597
RAB22A	748	958	893	1211	1123	1238	0.458775	0.0103366	1.98562
IPPK	198	291	248	398	360	376	0.621684	0.0103655	1.98441
H1FX	803	474	539	2359	1644	1553	1.61328	0.0104177	1.98223
NDEL1	639	1112	920	1533	1499	1704	0.826289	0.0104186	1.98219
AC116667.1	2	1	2	9	5	8	2.1375	0.0104697	1.98007
CREBBP	1300	1652	1500	2268	1951	2100	0.505243	0.0104808	1.9796
BLOC1S3	157	151	169	277	224	225	0.60598	0.0105028	1.9787
PURB	1239	1503	1244	2026	1739	2073	0.550533	0.0105038	1.97865
HEY1	8	7	6	27	16	22	1.63005	0.0105111	1.97835
AL391422.4	172	276	240	374	365	416	0.747412	0.0105144	1.97821
TULP3	862	992	1012	1293	1174	1349	0.413023	0.0105282	1.97765
KATNBL1	198	239	200	281	272	302	0.424631	0.0105625	1.97623
KCMF1	636	828	744	1088	966	1082	0.506185	0.0105834	1.97538
TOB1	330	381	406	281	250	256	-0.505194	0.0105953	1.97489
SPATA2L	113	169	155	260	320	380	1.1354	0.010603	1.97457
AC012313.1	165	182	160	140	120	126	-0.393385	0.0106166	1.97402
PDE3A	50	78	70	109	111	100	0.692571	0.0106199	1.97388
C11orf91	0	2	0	6	4	7	3.08746	0.0106366	1.9732
IMPDH1P10	1	3	1	8	5	7	2	0.0106366	1.9732
PPP2R2A	792	991	892	1296	1138	1242	0.458598	0.01066	1.97224
NOP14-AS1	371	585	485	783	771	904	0.770415	0.0106612	1.97219
NOTCH2NLA	205	270	219	410	341	346	0.660556	0.0106644	1.97206
PTPN2	212	279	244	439	360	367	0.665752	0.0106859	1.97119
MEF2A	1582	2280	2134	3105	2889	3300	0.632299	0.0106939	1.97086
THAP1	105	132	145	186	176	193	0.538915	0.0106969	1.97074
POLR3D	729	1067	902	1455	1295	1430	0.631613	0.0107305	1.96938
ZBTB14	185	169	166	147	145	136	-0.280901	0.0107345	1.96922
AREG	12	11	7	34	26	22	1.45066	0.0107485	1.96865
HSPA9	3290	3822	3256	5889	4623	5437	0.621328	0.0108098	1.96618
LENG8	1716	2585	2410	3438	3375	3535	0.624752	0.0108219	1.9657
VGLL3	1363	2449	2172	3536	4222	4781	1.06724	0.0108223	1.96568
SYT16	62	63	56	118	86	110	0.794775	0.0108539	1.96441
DDIT3	88	86	104	542	333	337	2.12423	0.0108545	1.96439
ZNF214	31	35	39	23	17	12	-1.01381	0.0108607	1.96414
ZNF710-AS1	66	84	92	43	32	47	-0.988126	0.0108721	1.96369
HDAC5	556	657	570	844	735	821	0.428728	0.0109085	1.96223
FSIP1	7	15	25	43	37	41	1.36427	0.0109317	1.96131
TADA1	76	99	92	61	45	46	-0.812768	0.0109632	1.96006
AL596325.2	1	2	1	6	4	4	1.80735	0.0110565	1.95638
AL033527.2	6	6	5	1	3	3	-1.28011	0.0110565	1.95638
ZNF416	41	69	50	93	89	104	0.837943	0.0110613	1.95619
TMEM268	225	297	285	427	367	392	0.555463	0.0110749	1.95566
WDR37	410	569	465	776	671	759	0.611362	0.0110944	1.9549
PHLDA3	896	1270	1148	2029	1608	1927	0.747549	0.0111099	1.95429
NRBF2	426	677	567	896	862	963	0.704289	0.0111199	1.9539
SRSF3	2195	2290	2119	3664	2907	3120	0.553305	0.0111652	1.95213
BMP4	769	1173	1083	454	489	428	-1.14171	0.0111932	1.95105
AHDC1	903	1262	1246	607	568	644	-0.907049	0.0112073	1.9505
LAMTOR3	248	349	333	462	462	438	0.550424	0.0112318	1.94955
FOXO1	27	39	28	64	50	55	0.846291	0.011243	1.94912
MAP2K7	564	641	670	495	475	453	-0.397955	0.0112653	1.94826
CWC25	228	283	269	481	365	434	0.714598	0.011307	1.94665
LFNG	78	136	122	190	251	249	1.03814	0.0113161	1.9463
ZNF609	1259	1673	1512	2254	1998	2084	0.511714	0.0113335	1.94564
BMS1P4	20	24	19	8	14	9	-1.02308	0.011355	1.94481
BAZ2B	338	501	423	677	608	664	0.627022	0.0113589	1.94466
AC118549.1	759	868	825	1247	1027	1124	0.470727	0.0113838	1.94371
MEX3D	410	573	538	885	746	766	0.65621	0.0113859	1.94363
BASP1	1920	2471	2328	3940	3107	3551	0.657474	0.0114148	1.94253
INO80	533	634	577	977	784	839	0.576112	0.0114299	1.94196
LYSMD1	94	93	101	83	70	73	-0.349746	0.0114347	1.94178
RPL10P9	11	12	13	7	6	9	-0.710493	0.0114469	1.94131
AP003465.2	8	5	8	2	3	2	-1.58496	0.0114469	1.94131
F8	65	61	67	57	55	53	-0.226135	0.0114469	1.94131
NOVA1	144	155	154	230	198	191	0.450428	0.011476	1.94021
SMN2	238	302	274	376	368	345	0.419903	0.0114804	1.94004
KIAA0355	788	1222	1091	1616	1575	1744	0.670317	0.0114888	1.93972
SHISA2	307	367	291	229	180	179	-0.714713	0.011489	1.93972
B3GALT5	97	104	84	133	121	123	0.403603	0.0114998	1.93931
SERPINA3	4	5	2	13	24	24	2.47131	0.0115161	1.93869
SLU7	429	609	564	839	752	802	0.578946	0.0115217	1.93848
ATP8B1	3046	4001	3451	5486	4662	5412	0.567728	0.0115283	1.93823
PFKFB3	636	1528	1602	2635	2702	3226	1.18508	0.0115689	1.93671
LARP1B	266	379	332	503	455	495	0.572604	0.0116018	1.93547
HUS1	202	247	243	315	288	306	0.393508	0.011656	1.93345
GUSBP11	97	112	95	71	74	80	-0.434146	0.0116685	1.93299
CHKA	160	209	219	319	273	294	0.591491	0.0116694	1.93295
PCLO	92	126	106	199	155	186	0.736966	0.0116836	1.93242
C2orf16	0	4	1	11	9	7	2.43296	0.0116912	1.93214
LINC02015	7	13	16	47	31	33	1.62449	0.0117224	1.93098
ARL8B	793	1050	924	1360	1223	1411	0.529512	0.011726	1.93085
FBXO8	115	177	165	252	236	232	0.655803	0.0117317	1.93064
CELF1	1551	1795	1641	2541	2082	2358	0.485262	0.0117375	1.93042
C22orf39	228	209	203	178	175	183	-0.255839	0.0117386	1.93038
KAT6B	651	825	810	1091	1009	1006	0.442232	0.0117712	1.92918
AC090192.2	4	2	4	21	14	12	2.23266	0.0117726	1.92913
SLC50A1	305	364	362	518	465	441	0.465905	0.0118075	1.92784
EXOC8	254	338	312	459	413	502	0.603987	0.0118334	1.92689
ZFPM2	80	111	97	164	145	137	0.630975	0.0118552	1.92609
ZFAND1	207	226	215	307	274	261	0.377826	0.0118563	1.92605
TMEM51	170	162	171	299	227	255	0.634764	0.0118574	1.92601
NECTIN3-AS1	11	6	6	16	19	15	1.12029	0.0118751	1.92536
AC084880.1	4	0	1	20	10	17	3.23266	0.011886	1.92496
AP000692.2	1	3	1	6	11	9	2.37851	0.011886	1.92496
LRRC8E	328	363	290	823	573	624	1.04203	0.0119035	1.92432
PPP2CB	717	1158	950	1598	1439	1613	0.71898	0.0119097	1.9241
NNMT	102	236	185	568	805	1051	2.21251	0.0119114	1.92404
AC010186.2	42	51	35	112	75	110	1.21432	0.0119191	1.92376
WBP1L	1537	2078	1931	2761	2552	3037	0.590329	0.0119975	1.92091
RUNDC1	325	495	438	214	166	198	-1.12199	0.0119999	1.92082
ARVCF	85	119	116	180	151	181	0.678072	0.0120066	1.92058
AL391244.2	23	28	29	18	15	11	-0.862496	0.012009	1.92049
TNFSF14	1	0	0	5	5	9	4.24793	0.012009	1.92049
AL731571.1	3	2	2	11	7	7	1.8365	0.012009	1.92049
RPL23AP74	3	0	4	7	9	9	1.8365	0.012009	1.92049
LRRC8C	348	301	309	595	441	555	0.731836	0.0120375	1.91946
PITX2	18	19	25	11	8	4	-1.43063	0.012059	1.91869
NSDHL	326	426	350	676	570	796	0.889859	0.0120844	1.91777
ASB8	325	412	341	249	233	201	-0.6584	0.0121056	1.91701
MYO10	4421	5689	4755	8223	6683	7637	0.60076	0.0121105	1.91684
ZNF586	68	96	84	124	131	115	0.577185	0.0121155	1.91666
TTBK2	210	307	288	467	392	426	0.674708	0.0121265	1.91627
GPBP1	492	746	601	1052	900	1028	0.696391	0.0121397	1.91579
ZBTB37	181	213	188	303	248	274	0.503375	0.0121533	1.91531
RTN4	10848	14691	13687	19753	17540	19646	0.537607	0.012169	1.91475
ARMCX5	99	103	118	175	145	147	0.545351	0.0122121	1.91321
AMD1	1217	1320	1136	996	809	825	-0.481896	0.0122497	1.91187
ATXN2L	2133	2316	2141	4246	3100	3623	0.735082	0.0122842	1.91065
E2F3	581	733	615	1009	859	898	0.519948	0.0122918	1.91038
DUSP3	1331	1864	1786	2493	2323	2418	0.538358	0.0123215	1.90933
C16orf70	226	276	266	193	180	190	-0.447971	0.0123266	1.90916
GARS	2695	3843	3411	5421	4664	5608	0.657498	0.0123307	1.90901
AC007238.1	30	33	30	26	25	27	-0.253757	0.0123485	1.90839
LYPD1	47	52	42	34	27	33	-0.584963	0.0123818	1.90721
FBXL3	409	554	499	711	650	702	0.496801	0.0124184	1.90593
WWC1	417	506	459	897	656	867	0.808249	0.0124344	1.90537
MIR137HG	54	56	47	71	71	85	0.531928	0.012483	1.90368
GATA6-AS1	10	8	13	19	18	16	0.773724	0.012501	1.90306
AFF4	2333	3475	2990	4724	4300	5187	0.691761	0.0125278	1.90213
NCOA2	347	416	404	510	473	492	0.33791	0.0125344	1.9019
TNIK	601	822	704	1142	965	1088	0.586996	0.012536	1.90184
TBC1D15	334	385	368	535	449	481	0.430549	0.0125438	1.90157
ERN1	100	224	196	344	324	377	1.00692	0.0125452	1.90152
ZMYM3	842	943	940	750	600	600	-0.482782	0.0125948	1.89981
ZNF506	21	31	34	63	52	48	0.922463	0.0126014	1.89958
PRRG4	21	11	7	55	40	36	1.74802	0.0126099	1.89929
HOMER1	106	163	161	379	508	675	1.86099	0.0126172	1.89904
ACVR1B	295	369	349	511	440	458	0.476037	0.0126504	1.8979
INO80C	165	178	164	316	231	296	0.733547	0.0126534	1.89779
FLVCR2	2	0	1	15	12	7	3.5025	0.0126564	1.89769
AC104695.2	3	2	7	18	12	13	1.8413	0.0126564	1.89769
GBP3	516	747	631	1027	901	948	0.602627	0.0126581	1.89763
CPEB3	19	63	54	113	101	102	1.21632	0.0126665	1.89734
RAB11FIP5	1569	2130	2072	2986	2611	3007	0.576186	0.0126665	1.89734
ELF2	300	350	295	247	231	229	-0.418604	0.0126702	1.89721
MARK3	872	1155	973	1655	1353	1557	0.605652	0.0127199	1.89552
ZNF284	60	79	75	36	39	49	-0.787271	0.0127403	1.89482
SLC2A1	8112	12032	12120	17662	15771	17944	0.671197	0.0128101	1.89245
RAI1	936	1291	1241	683	660	694	-0.767658	0.0128264	1.8919
LINC00973	95	60	78	198	142	151	1.07539	0.0128373	1.89153
GATAD1	407	617	499	767	765	772	0.597225	0.012838	1.8915
CASP9	86	88	95	104	104	100	0.195324	0.0128394	1.89145
TMEM159	56	91	69	191	128	183	1.21666	0.0128612	1.89072
RALA	709	887	868	1336	1220	1629	0.764225	0.012884	1.88995
NDUFB2-AS1	10	13	13	22	18	25	0.852443	0.0128904	1.88973
AC108704.2	6	7	8	25	19	15	1.49033	0.0128954	1.88957
ZNF180	115	92	89	61	50	65	-0.750022	0.0129006	1.88939
CNST	332	460	393	654	552	690	0.678072	0.0129052	1.88924
MT1X	134	178	187	353	282	266	0.852487	0.0129072	1.88917
JRK	295	375	426	221	171	169	-0.966175	0.0129316	1.88835
STK38L	676	1335	1296	2410	2788	3690	1.42634	0.0129402	1.88806
MED11	113	113	101	93	81	82	-0.353147	0.0129916	1.88634
EBLN2	1	4	4	12	8	9	1.68806	0.0130119	1.88566
RSL24D1	530	740	581	1065	870	1025	0.677292	0.0130683	1.88378
TNFRSF12A	3998	6431	5672	8819	8149	8660	0.670571	0.0131208	1.88204
FOXE1	45	62	52	33	18	24	-1.08406	0.0131213	1.88202
TCP11L1	266	338	325	448	409	494	0.540277	0.0131325	1.88165
SH3RF1	1741	2923	2442	3683	4341	4503	0.817931	0.0131412	1.88136
AC103740.2	6	10	6	13	13	13	0.825971	0.0131581	1.88081
BEST1	5	3	2	7	10	10	1.43296	0.0131581	1.88081
AXIN2	20	18	26	10	8	12	-1.09311	0.0131581	1.88081
AL627402.1	2	4	7	10	11	11	1.29956	0.0131735	1.8803
MINDY4	6	4	6	10	10	8	0.807355	0.0132356	1.87826
CYP51A1P1	0	0	1	3	6	4	3.70044	0.0132356	1.87826
AC005540.1	2	0	0	6	4	4	2.80735	0.0132356	1.87826
AC020928.1	0	0	1	3	2	2	2.80735	0.0132356	1.87826
ACTBP7	0	0	1	2	3	2	2.80735	0.0132356	1.87826
AL132639.3	0	0	1	3	2	2	2.80735	0.0132356	1.87826
SSUH2	0	0	1	2	3	2	2.80735	0.0132356	1.87826
AC133552.5	1	1	0	2	3	3	2	0.0132356	1.87826
HTRA4	1	1	0	3	3	2	2	0.0132356	1.87826
DEPTOR	1	2	2	4	3	4	1.1375	0.0132356	1.87826
PCDHA4	3	6	4	0	1	0	-3.70044	0.0132356	1.87826
TJAP1	354	379	373	684	546	523	0.664475	0.0132375	1.87819
ASAP1	2035	2913	2413	3593	3448	3636	0.536533	0.0132397	1.87812
SUPV3L1	359	433	385	629	504	585	0.545616	0.0132755	1.87695
ZNF229	130	206	194	420	293	379	1.04291	0.0133176	1.87557
BAK1	376	546	485	725	682	822	0.663774	0.0133205	1.87548
CDK7	255	433	331	678	545	612	0.848626	0.0133613	1.87415
ETF1	2136	2725	2281	3658	3094	3639	0.540934	0.0133826	1.87346
XIRP1	4	5	6	158	315	381	5.8312	0.0133869	1.87332
LAMB3	524	673	613	1238	907	1016	0.804391	0.0134182	1.8723
PLEKHM1P1	132	159	162	193	201	222	0.443419	0.0134786	1.87036
GATAD2B	708	937	776	1196	1063	1219	0.522655	0.0134895	1.87
VIM-AS1	24	26	51	81	66	79	1.16197	0.0134933	1.86988
BEX2	7	10	3	15	15	17	1.23266	0.0135134	1.86924
AP000704.1	13	11	7	20	21	17	0.903785	0.0135134	1.86924
RUSC2	1347	2183	1933	2814	2860	3028	0.671654	0.01353	1.8687
CEP135	160	126	142	292	210	250	0.813122	0.0135444	1.86824
PALB2	227	237	249	205	212	211	-0.183138	0.0135503	1.86805
DHX34	357	418	417	664	528	569	0.563011	0.0135802	1.86709
URGCP	592	733	658	1045	849	1015	0.552839	0.0135804	1.86709
SCYL3	93	118	125	74	64	70	-0.691878	0.0136013	1.86642
TAF1D	538	630	543	1004	799	817	0.614727	0.0136201	1.86582
SNX8	305	400	375	558	479	588	0.589408	0.0136242	1.86569
LINC01006	61	60	41	101	83	86	0.736966	0.013653	1.86477
AKAP5	139	174	175	111	112	115	-0.529858	0.0136684	1.86428
PRPF39	212	235	188	469	326	389	0.898841	0.0136684	1.86428
AMT	12	16	19	7	6	2	-1.6477	0.0136759	1.86404
KDM8	50	40	40	31	25	25	-0.682518	0.0136769	1.86401
CBX4	347	399	409	287	203	174	-0.798638	0.0136794	1.86393
NECAB3	100	104	109	161	144	129	0.471532	0.0136961	1.8634
CLCN4	322	323	292	457	376	431	0.431876	0.0136968	1.86338
ZNF529	117	177	148	233	222	269	0.711943	0.0137258	1.86246
TCF20	596	784	717	1053	915	1087	0.542846	0.013741	1.86198
AC005229.4	28	33	28	76	51	58	1.05565	0.0137645	1.86124
EID2	145	187	151	108	66	84	-0.904652	0.0137773	1.86084
ZFYVE1	375	513	505	687	643	752	0.579775	0.0137934	1.86033
ZNF225	67	111	97	30	41	36	-1.36182	0.0137971	1.86021
TSPYL2	262	418	379	603	542	550	0.678583	0.0138367	1.85897
RTL3	8	11	9	22	16	25	1.16993	0.0138813	1.85757
HBP1	461	684	732	971	966	1069	0.679416	0.0138875	1.85738
ZNF425	49	78	71	31	30	24	-1.21997	0.0138923	1.85723
FMNL2	1039	1292	1133	1788	1476	1669	0.510026	0.0139056	1.85681
DSEL	1525	1835	1599	2446	2058	2292	0.454637	0.0139191	1.85639
POLR1C	288	379	329	234	208	202	-0.629085	0.0139434	1.85563
MAGOHB	134	134	142	147	152	149	0.127875	0.0140194	1.85327
ZC3H6	130	159	150	181	188	181	0.325211	0.0140794	1.85141
ZBTB22	236	335	300	419	402	446	0.540672	0.0140832	1.8513
MMACHC	170	182	173	146	109	129	-0.451211	0.0140868	1.85119
CHMP2B	423	632	514	898	752	919	0.711362	0.0141374	1.84963
CCDC51	135	181	180	108	98	90	-0.744743	0.0141824	1.84825
MOB3C	183	282	184	423	387	342	0.82785	0.0141842	1.8482
ACBD5	414	464	471	383	340	340	-0.343749	0.0142534	1.84608
PPP1R3C	345	600	601	185	127	155	-1.72705	0.0143331	1.84366
SLC25A37	1071	1710	1534	2169	2291	2487	0.68703	0.0143687	1.84258
CBX2	129	108	82	57	35	38	-1.29504	0.0144448	1.84029
ZNF66	20	15	13	27	25	24	0.662965	0.0145131	1.83824
LIMA1	1663	2816	2244	3597	3641	4144	0.759577	0.014524	1.83791
ARHGEF2	939	1168	1104	2393	1665	1923	0.897364	0.0145353	1.83758
ASB3	178	208	201	268	240	240	0.349678	0.0145472	1.83722
AL590438.1	13	11	7	25	20	31	1.29373	0.0145513	1.8371
AC007406.5	62	82	72	42	50	47	-0.635946	0.014592	1.83588
LINC00622	1	0	0	7	9	15	4.9542	0.0146027	1.83557
LYSMD3	339	494	433	617	603	685	0.589514	0.0146205	1.83504
KMT5A	687	774	700	1183	915	1089	0.5605	0.014636	1.83458
TOLLIP	669	941	822	1291	1100	1247	0.581002	0.0146428	1.83438
AC004889.1	78	97	82	157	126	124	0.66326	0.0146583	1.83392
ACKR3	149	209	210	341	292	403	0.867061	0.0146901	1.83298
ADRA2C	2	3	1	6	8	5	1.66297	0.0147206	1.83207
AKAP3	3	6	5	8	9	10	0.947533	0.0147206	1.83207
ITGB6	14	15	15	17	20	20	0.373458	0.0147206	1.83207
AP001330.4	1	0	1	7	4	4	2.90689	0.0147206	1.83207
AC004076.2	4	7	4	0	1	1	-2.90689	0.0147206	1.83207
GLS	1067	1539	1329	2112	1836	2260	0.657765	0.0147999	1.82974
ZNF223	51	70	65	32	18	37	-1.09622	0.0148084	1.82949
MB21D2	114	161	129	235	189	236	0.708111	0.0148107	1.82942
ZNF503	501	808	815	274	255	307	-1.34521	0.0148117	1.8294
PIK3CA	407	525	495	635	617	692	0.446043	0.0148255	1.82899
ATF7	772	996	997	1341	1200	1271	0.463269	0.0148914	1.82707
SPINDOC	389	510	454	746	625	630	0.564559	0.0149354	1.82578
ZNF263	387	478	500	622	607	583	0.408682	0.0149405	1.82564
LMCD1	124	215	202	357	448	570	1.34573	0.0149473	1.82544
MOSPD2	182	254	231	337	313	385	0.633872	0.0149547	1.82522
ZNF365	271	380	296	458	444	501	0.567079	0.0149704	1.82477
PRTG	90	82	93	182	128	151	0.798774	0.0150134	1.82352
AC092807.3	50	77	80	144	136	200	1.2134	0.015041	1.82272
ISLR2	2	13	3	19	28	29	2.078	0.0150877	1.82138
MT2P1	41	42	32	78	68	56	0.812721	0.0151155	1.82058
TERT	43	64	42	133	91	102	1.12956	0.0151518	1.81954
DIRAS1	155	246	232	386	314	384	0.776087	0.0151566	1.8194
TRIM36	37	47	37	119	72	105	1.29059	0.0151983	1.8182
TRIM66	116	119	119	98	84	69	-0.496062	0.015205	1.81801
USP32	844	1119	958	1364	1266	1436	0.477148	0.0152134	1.81777
AC090970.2	4	4	2	15	28	33	2.926	0.0152263	1.81741
UIMC1	281	309	298	372	337	388	0.304932	0.015233	1.81722
PPM1H	86	83	96	105	107	103	0.249359	0.0152362	1.81712
FBXW4P1	1	8	8	20	16	15	1.58496	0.0153011	1.81528
AC097634.1	3	11	10	20	17	21	1.27302	0.0153011	1.81528
MAP4K3	321	408	343	524	454	532	0.494244	0.0154028	1.8124
CYP1A1	4	1	2	13	7	12	2.19265	0.0154053	1.81233
FBXO32	1944	3591	3419	5220	5970	7180	1.03675	0.0154168	1.81201
RGMB	1036	1222	1031	1837	1421	1719	0.597627	0.0154354	1.81148
C3orf80	3	2	3	10	6	11	1.75489	0.0154653	1.81064
GATA6	810	1428	1094	1807	1890	1826	0.729064	0.0154822	1.81017
TRIB2	344	494	429	164	260	217	-0.98302	0.0154982	1.80972
STAT3	1660	2292	2247	3153	2807	3326	0.583022	0.0155438	1.80844
TLK2	434	580	509	838	674	800	0.602225	0.0155754	1.80756
DSE	603	910	821	1232	1154	1426	0.707744	0.0155766	1.80753
NOTCH2	6434	9508	7843	12225	11119	11934	0.568717	0.0155933	1.80706
CITED2	2144	3366	3104	4593	6599	6477	1.03647	0.0156681	1.80498
BCORL1	278	305	324	247	195	222	-0.449919	0.015706	1.80393
PISD	409	467	391	729	553	668	0.622058	0.0157061	1.80393
RLIM	1114	1568	1246	2002	1792	1926	0.54222	0.0157072	1.8039
PRDM4	595	727	613	1301	958	1032	0.766192	0.0157101	1.80382
MDM4	192	220	248	340	282	324	0.519374	0.0157731	1.80208
ZNF527	54	73	69	37	35	45	-0.744345	0.015783	1.80181
ATP5MF-PTCD1	114	155	125	70	84	50	-0.949626	0.0157834	1.8018
CCDC142	186	241	224	148	118	151	-0.64261	0.0157843	1.80178
OTOGL	2	4	2	5	6	6	1.08746	0.0157998	1.80135
AC124068.2	1	0	1	3	3	5	2.45943	0.0157998	1.80135
KSR2	0	1	1	3	3	5	2.45943	0.0157998	1.80135
AC007996.1	25	21	24	13	6	15	-1.04182	0.0157998	1.80135
GUSBP9	9	8	12	4	2	5	-1.39855	0.0157998	1.80135
TRMT12	70	68	61	46	50	33	-0.625397	0.0159333	1.79769
KLHL28	71	134	135	246	189	239	0.987214	0.0159754	1.79655
GNAZ	56	48	45	35	25	34	-0.66458	0.0159795	1.79644
SPICE1	109	102	91	149	125	155	0.506429	0.0159955	1.796
DUSP15	1	0	0	7	3	6	4	0.016011	1.79558
MIR762HG	13	14	14	11	8	7	-0.657112	0.016011	1.79558
VN1R1	5	7	8	0	3	2	-2	0.016011	1.79558
ZNF613	58	69	66	47	28	24	-0.9631	0.0160209	1.79531
SDHAF1	79	120	109	46	51	58	-0.990662	0.016074	1.79388
RIT1	285	517	421	667	686	779	0.801783	0.0160794	1.79373
CAMSAP1	921	1228	1057	1675	1395	1604	0.543883	0.0161032	1.79309
EFNB1	110	110	92	175	135	159	0.588042	0.0161203	1.79263
AL139287.1	4	5	3	1	1	2	-1.58496	0.0161301	1.79236
AC009630.1	1	1	0	2	2	2	1.58496	0.0161301	1.79236
LINC00640	1	1	0	2	2	2	1.58496	0.0161301	1.79236
NRBF2P3	1	0	1	2	2	2	1.58496	0.0161301	1.79236
PPP5D1	1	1	0	2	2	2	1.58496	0.0161301	1.79236
AC087392.3	1	1	1	3	2	2	1.22239	0.0161301	1.79236
AC021218.1	2	2	2	4	3	3	0.736966	0.0161301	1.79236
AC024060.2	7	6	8	4	5	4	-0.691878	0.0161301	1.79236
OAS2	3	3	3	2	1	2	-0.847997	0.0161301	1.79236
DNASE1L2	15	20	16	7	11	5	-1.14886	0.0161301	1.79236
RBM44	2	3	2	1	1	1	-1.22239	0.0161301	1.79236
AC105206.1	1	0	0	2	3	4	3.16993	0.0161301	1.79236
AL390755.3	0	1	0	3	4	2	3.16993	0.0161301	1.79236
PCF11-AS1	0	1	0	4	3	2	3.16993	0.0161301	1.79236
LINC01547	57	61	74	83	85	88	0.415037	0.0161301	1.79236
C9orf147	2	3	4	0	1	0	-3.16993	0.0161301	1.79236
TAF5	106	93	91	68	30	30	-1.17991	0.0161751	1.79115
ZNF576	139	171	178	119	108	112	-0.525596	0.0161772	1.7911
RHEBP1	17	16	23	33	32	44	0.960829	0.016197	1.79057
HNRNPA1P48	283	279	272	444	344	394	0.503111	0.0162152	1.79008
MED26	170	193	166	238	208	232	0.358018	0.0162353	1.78954
ZNF507	333	449	354	607	512	556	0.560198	0.016255	1.78901
NIPBL	983	1183	1056	1552	1316	1428	0.415037	0.0162959	1.78792
UBL3	417	560	493	685	645	746	0.49799	0.0163242	1.78717
EGFL8	26	35	27	13	13	0	-1.75899	0.0163259	1.78712
PRMT6	355	433	358	292	251	232	-0.564339	0.0163722	1.78589
CBLL1	360	437	388	669	517	588	0.582119	0.0164123	1.78483
TET1	109	134	128	91	95	94	-0.405992	0.0164649	1.78344
MKRN2	518	701	572	985	798	941	0.604961	0.0165233	1.7819
ZBTB46	26	42	41	55	61	58	0.674759	0.0165317	1.78168
RAB2B	226	281	288	379	333	373	0.448668	0.0165336	1.78163
HINT3	243	340	368	516	454	558	0.684127	0.0165351	1.78159
SYNGAP1	426	421	470	650	554	548	0.411747	0.0165456	1.78132
PCNX2	197	259	227	332	293	310	0.453081	0.0165509	1.78118
OPTN	1667	2458	2267	3404	2948	3390	0.607951	0.0165688	1.78071
MAGI2-AS3	408	570	432	739	643	733	0.584963	0.016602	1.77984
MBIP	162	194	148	121	93	99	-0.687261	0.0166021	1.77984
ANKRD50	637	807	724	1070	920	1136	0.527953	0.0166352	1.77897
HNMT	20	19	16	10	13	7	-0.874469	0.0167779	1.77526
CFHR1	1	2	3	12	6	10	2.22239	0.0167994	1.77471
GNRHR2	10	13	8	5	1	3	-1.78427	0.0167994	1.77471
ACVR1	571	740	666	929	876	1070	0.540249	0.0168232	1.77409
SLC31A2	49	62	54	103	81	119	0.876852	0.0168277	1.77397
IQCJ-SCHIP1	430	837	681	1102	1118	1137	0.785179	0.0168559	1.77325
SEPSECS	71	82	73	123	95	119	0.576426	0.0168646	1.77303
PDS5B	496	511	451	406	327	378	-0.392132	0.0168928	1.7723
ELMO3	17	13	14	10	5	6	-1.06711	0.0168963	1.77221
NUDT6	38	37	32	29	27	28	-0.34915	0.0168963	1.77221
ZNF396	24	32	29	13	15	20	-0.824428	0.0168999	1.77212
HSPA4L	234	178	158	951	548	597	1.8786	0.0169056	1.77197
BCL7B	505	581	566	878	695	766	0.501678	0.0169549	1.77071
AC025171.1	11	9	5	17	15	20	1.05658	0.0169833	1.76998
IGF1R	1039	1682	1416	2253	2037	2434	0.700735	0.0169961	1.76965
AHSA1	1264	1474	1447	2178	1729	2010	0.499638	0.0170047	1.76943
MAP3K14	546	644	638	1357	1023	957	0.868286	0.0170216	1.769
ARHGAP32	280	381	381	537	484	477	0.523682	0.0170335	1.7687
DCLK2	93	149	144	193	202	210	0.648334	0.0170366	1.76862
RAPH1	2378	3820	3110	4781	4651	5271	0.659567	0.0170406	1.76852
AMH	12	7	13	33	21	25	1.30378	0.0170982	1.76705
AL035071.1	9	7	11	4	1	4	-1.58496	0.017133	1.76617
FAM131A	132	122	141	295	211	216	0.870146	0.0171387	1.76602
GPR75	11	22	9	48	36	32	1.46566	0.0171389	1.76602
PTPN12	988	1279	1136	1636	1426	1571	0.44514	0.0171716	1.76519
PTCD1	134	155	108	86	57	54	-1.01094	0.017214	1.76412
TMEM251	72	66	53	116	90	125	0.793259	0.017214	1.76412
AC098487.1	18	7	8	27	28	23	1.24101	0.0172951	1.76208
CREM	119	169	157	225	205	207	0.517488	0.0173547	1.76058
PLPP6	79	130	127	207	170	190	0.754888	0.017358	1.7605
ADSS	789	1217	1022	1609	1427	1607	0.616692	0.0173784	1.75999
ELK3	1881	2544	2319	3324	2916	3182	0.482429	0.0174311	1.75868
LRCH1	330	352	338	632	451	612	0.732716	0.0175003	1.75695
KMT2E	1109	1631	1469	2151	1924	2125	0.558791	0.0175241	1.75636
C12orf65	198	224	197	174	142	151	-0.406517	0.0175605	1.75546
PCDH18	226	274	222	184	163	154	-0.527188	0.0176487	1.75329
SOX12	1212	1283	1278	1039	736	688	-0.615295	0.0176803	1.75251
ZNF641	69	145	130	225	195	247	0.955278	0.0177348	1.75117
TCEANC2	184	179	161	136	83	109	-0.675871	0.0177744	1.75021
CATSPERE	1	1	1	4	8	5	2.5025	0.0177974	1.74964
PLD6	85	83	59	158	116	128	0.824503	0.0178082	1.74938
LINC01776	5	5	3	12	8	9	1.15754	0.0178326	1.74878
WASH4P	19	19	25	14	8	10	-0.97728	0.0179172	1.74673
ZNF655	488	668	616	810	780	817	0.441858	0.0179714	1.74542
NXT1	187	234	210	289	257	276	0.381498	0.0179714	1.74542
RPUSD1	454	523	468	389	279	270	-0.62341	0.0179917	1.74493
PPOX	102	111	112	94	83	93	-0.26748	0.0179968	1.74481
AL121603.2	27	28	10	48	44	43	1.05445	0.0180686	1.74308
AC016831.1	14	11	10	45	36	69	2.09954	0.0180932	1.74248
THAP9	14	21	26	40	33	35	0.82415	0.0180952	1.74244
DDAH1	2904	4360	3653	5584	5200	6324	0.648095	0.0181143	1.74198
SLAIN2	761	1050	936	1405	1282	1652	0.659506	0.018145	1.74124
KAZN	69	82	78	51	63	54	-0.446886	0.0181785	1.74044
METTL23	184	230	208	357	273	312	0.598812	0.0182182	1.7395
MRPL18	488	604	581	880	725	754	0.495738	0.0182451	1.73885
RFLNB	925	1398	1137	1747	1616	1790	0.574641	0.0182511	1.73871
ZNF189	160	273	243	359	348	363	0.662516	0.0182653	1.73837
PGPEP1	511	650	638	447	394	414	-0.519508	0.0182735	1.73818
DISC1	117	137	130	168	155	151	0.303781	0.0182769	1.7381
NR2F1	2938	4565	3931	1939	2140	1705	-0.983191	0.0183879	1.73547
NEU1	651	917	857	1117	1118	1251	0.523588	0.0184104	1.73494
ANKRA2	97	130	118	170	148	177	0.520832	0.0184223	1.73466
BNC2	827	1168	1038	1419	1365	1410	0.467581	0.0184431	1.73417
MRPL33	337	373	381	473	418	441	0.287943	0.0184452	1.73412
ZNF211	120	157	144	101	79	95	-0.614389	0.0184473	1.73407
SDSL	81	119	89	190	142	165	0.782176	0.0184489	1.73403
UCK2	861	1135	924	1419	1327	1658	0.592846	0.0184607	1.73375
MAP3K7CL	349	550	491	704	716	855	0.710782	0.0184824	1.73324
AL162586.1	0	4	5	11	8	11	1.73697	0.0185536	1.73157
SRCAP	1762	2111	1992	1600	1358	1482	-0.401571	0.0186032	1.73041
ZBTB26	84	98	94	75	62	54	-0.531096	0.0186467	1.7294
RC3H1	351	416	378	647	492	564	0.572731	0.0186496	1.72933
EFHD2	1328	1321	1114	2537	1840	1971	0.754419	0.0186498	1.72933
FBRS	1719	2363	2137	3323	2756	3010	0.547439	0.018658	1.72914
IRF7	24	22	21	44	33	51	0.933911	0.0186583	1.72913
PSEN1	764	1089	999	1418	1270	1465	0.54218	0.0186596	1.7291
OSBP2	47	56	79	125	94	114	0.871584	0.0186893	1.72841
ZNF776	216	245	246	291	290	268	0.264054	0.0186934	1.72831
MYCL	1	2	3	25	11	17	3.14296	0.0187011	1.72813
TMEM121	25	28	24	18	17	10	-0.774933	0.0187023	1.72811
CASKIN2	366	487	500	311	231	248	-0.776237	0.0187648	1.72666
CASP4	295	367	318	502	407	484	0.507342	0.018797	1.72591
AF111167.2	0	1	0	13	10	5	4.80735	0.0188045	1.72574
GPR3	24	37	42	80	55	73	1.01394	0.0188789	1.72402
AC006460.2	6	12	6	16	18	15	1.02975	0.0189001	1.72354
CHD8	1521	1851	1665	1339	1066	1215	-0.476575	0.018906	1.7234
WASL	559	753	613	874	844	934	0.462222	0.0189113	1.72328
AL645608.7	12	13	12	160	92	77	3.15249	0.0189203	1.72307
AL161431.1	107	66	69	362	231	211	1.73219	0.0189256	1.72295
THNSL1	162	159	179	134	87	88	-0.694321	0.0189261	1.72294
CAMSAP2	906	1265	1050	1770	1430	1707	0.607333	0.0189791	1.72172
RIDA	105	112	114	94	73	87	-0.382003	0.0190584	1.71991
APLF	34	41	37	53	47	46	0.38247	0.0190821	1.71937
TRIM45	36	47	43	101	68	76	0.959358	0.0191458	1.71793
TMEM161B	95	95	100	134	111	123	0.343653	0.0191534	1.71775
LOX	11212	20789	18394	27324	30422	35757	0.891732	0.0192043	1.7166
LCOR	848	1005	847	1733	1249	1431	0.7088	0.0192402	1.71579
MAP3K10	211	288	257	446	351	373	0.63005	0.0192419	1.71575
RELT	147	170	151	450	264	373	1.21577	0.0192466	1.71565
OTUD3	96	143	112	201	170	229	0.773491	0.019339	1.71357
PFKFB2	121	192	154	252	228	284	0.71015	0.019341	1.71352
CHD2	1273	1841	1607	2974	2241	2557	0.719193	0.0193631	1.71303
GAN	77	88	63	138	107	150	0.792819	0.0193731	1.7128
APBA1	27	25	23	31	33	38	0.443607	0.0194231	1.71168
AC098588.2	0	2	0	3	5	4	2.58496	0.0194418	1.71126
AL359834.1	0	2	0	3	4	5	2.58496	0.0194418	1.71126
TEN1-CDK3	22	32	42	51	58	57	0.790077	0.0194418	1.71126
AL139095.2	3	2	4	7	5	7	1.078	0.0194418	1.71126
MIR503HG	7	5	7	3	4	2	-1.078	0.0194418	1.71126
PLEKHA5	414	499	412	710	560	645	0.531352	0.0194509	1.71106
XKR8	247	221	251	197	152	135	-0.570985	0.0195177	1.70957
BLZF1	297	477	395	580	578	617	0.602544	0.0195708	1.70839
BDP1	583	794	635	978	874	991	0.498784	0.0196065	1.7076
CDAN1	204	233	206	179	135	145	-0.486325	0.0196171	1.70737
FOXO3B	248	361	329	506	424	474	0.581883	0.0196509	1.70662
ADAMTS15	1079	1764	1535	722	721	639	-1.0723	0.0196652	1.7063
ENO3	24	30	31	55	39	53	0.790281	0.0196685	1.70623
ENTPD7	1524	2466	2189	3384	3004	3721	0.710195	0.0196782	1.70601
F8A1	496	553	484	428	334	321	-0.501324	0.019731	1.70485
SLC66A1	319	399	382	565	471	489	0.471306	0.0198273	1.70274
ARHGAP24	145	245	229	327	314	333	0.653982	0.0198646	1.70192
NT5C3A	162	182	153	259	207	227	0.47961	0.0198663	1.70188
AC078846.1	16	25	25	11	10	11	-1.04439	0.0198664	1.70188
HOXB9	2	0	0	9	4	7	3.32193	0.0198908	1.70135
ZKSCAN4	69	122	116	46	35	30	-1.46768	0.0199019	1.70111
FBXO42	360	609	528	220	230	221	-1.15769	0.0199247	1.70061
PRRC2C	3584	4549	3986	6289	5081	5797	0.502367	0.0199438	1.70019
ZNF426	267	320	289	383	349	354	0.310021	0.0199678	1.69967
TMEM185B	1071	1482	1315	1831	1687	1962	0.502588	0.0199732	1.69955
HABP4	513	776	652	1028	888	1019	0.59656	0.0199904	1.69918
CNTLN	117	157	134	229	183	197	0.577873	0.0199927	1.69913
Z99572.1	9	13	13	33	26	47	1.59864	0.019995	1.69908
IPCEF1	7	13	11	44	26	28	1.66051	0.0200266	1.69839
IRF5	11	8	14	23	19	29	1.10535	0.0200469	1.69795
TUBB4A	5	6	8	3	0	2	-1.926	0.0200921	1.69697
AFG3L1P	156	168	132	118	97	91	-0.575502	0.0201705	1.69528
DUS4L	80	71	78	126	96	109	0.531484	0.0202178	1.69427
DLC1	4165	7061	5996	8606	9058	9307	0.647156	0.0202215	1.69419
CSRNP2	466	722	561	1018	829	939	0.671665	0.0202879	1.69276
C20orf194	197	343	301	475	419	497	0.725945	0.0203842	1.69071
PPP4R2	699	941	788	1281	1050	1183	0.533346	0.0204931	1.68839
AC096536.2	10	8	4	15	16	13	1	0.0204981	1.68829
SPATA24	16	22	18	10	11	13	-0.719892	0.0204981	1.68829
PCF11	558	768	666	1087	870	1019	0.579157	0.0205088	1.68806
NCKAP5	75	67	56	137	99	106	0.788496	0.0205091	1.68805
DAPK3	945	1415	1311	2118	1719	1882	0.63959	0.0205269	1.68768
SRGAP1	534	727	580	977	802	954	0.569996	0.0205434	1.68733
ZNF639	339	435	392	288	225	276	-0.563471	0.0205502	1.68718
EED	205	151	185	131	101	102	-0.69578	0.0205885	1.68638
NOL4L	344	525	478	243	253	246	-0.860259	0.0205902	1.68634
CCDC9	187	327	284	481	396	469	0.754218	0.0205928	1.68628
RERE	1905	2559	2202	3575	2868	3371	0.55802	0.0206049	1.68603
TIMM23B	166	210	195	252	278	328	0.587487	0.020613	1.68586
TIMM9	181	187	188	291	243	230	0.458488	0.0206194	1.68572
DPM1	277	359	306	439	389	439	0.427618	0.020711	1.6838
PIK3CD	436	445	464	1028	650	920	0.949795	0.0207337	1.68332
ZNF331	95	110	96	80	77	62	-0.458833	0.0207557	1.68286
HSP90AB1	18861	24255	20910	33645	27263	30069	0.506844	0.0207589	1.6828
ZNF326	356	438	401	557	477	534	0.391915	0.0207863	1.68222
CSNK1G1	584	748	660	1235	895	1073	0.685206	0.0207877	1.68219
MERTK	20	10	18	40	27	35	1.08746	0.0208351	1.6812
AL390719.1	13	9	9	40	21	37	1.66051	0.0209483	1.67885
CAMTA1	204	239	241	272	277	301	0.313467	0.0209552	1.67871
GPER1	67	67	58	140	97	105	0.83289	0.0209682	1.67844
HAS2	76	126	98	54	38	32	-1.27462	0.0209746	1.67831
AC024075.2	49	40	36	29	26	26	-0.625934	0.0209746	1.67831
ATXN1L	644	976	819	1210	1125	1293	0.572885	0.0210485	1.67678
AXIN1	396	540	473	730	606	682	0.518255	0.0211019	1.67568
ZNF680	56	66	55	85	77	72	0.402759	0.0212164	1.67333
E2F6	158	239	209	396	296	330	0.754005	0.0212259	1.67313
NUDT12	97	105	103	89	72	83	-0.321928	0.0212331	1.67299
CRYM-AS1	1	4	0	10	7	14	2.63227	0.0212607	1.67242
ZNF430	100	108	97	149	123	128	0.391191	0.021285	1.67193
ZNF221	20	27	34	9	5	14	-1.5325	0.0212994	1.67163
PAIP2	555	766	747	958	914	1035	0.491295	0.0213009	1.6716
PDP2	485	635	544	405	367	395	-0.511851	0.0213079	1.67146
AC139795.3	2	1	0	4	3	5	2	0.0213116	1.67138
AC010326.4	24	28	26	20	18	22	-0.378512	0.0213116	1.67138
RFX3-AS1	4	5	3	1	2	0	-2	0.0213116	1.67138
DBR1	169	207	153	121	69	97	-0.882217	0.0213269	1.67107
MIR17HG	4	4	0	7	9	8	1.58496	0.0213789	1.67001
FZD5	113	134	152	331	213	255	1.00181	0.0213789	1.67001
CA13	55	67	65	147	93	124	0.9609	0.0214056	1.66947
AL096870.2	5	8	9	22	13	21	1.34792	0.0214606	1.66836
SFPQ	4128	4594	4150	7709	5743	6180	0.608971	0.0215088	1.66738
EAF1	345	579	480	769	681	759	0.65385	0.0215652	1.66625
PLPBP	597	644	578	542	472	477	-0.286865	0.0216094	1.66536
LSM10	337	389	339	289	295	260	-0.335539	0.0216658	1.66423
AC060766.7	27	20	16	37	39	31	0.764187	0.0216947	1.66365
CLK4	99	137	118	167	153	178	0.492396	0.021716	1.66322
UBAP1	807	1091	1028	1324	1250	1361	0.427434	0.0217246	1.66305
PDP1	606	680	596	949	750	902	0.4668	0.0217438	1.66266
RAD54L2	526	715	581	825	802	814	0.421949	0.0217563	1.66242
PIGA	89	143	109	183	168	211	0.720798	0.0217614	1.66231
METTL15P1	28	22	32	52	38	47	0.74048	0.0217623	1.6623
AC105046.1	0	1	0	14	23	9	5.52356	0.0217718	1.66211
FOXF1	3	2	2	27	13	15	2.974	0.0217835	1.66187
AL135905.1	15	17	11	20	25	23	0.661198	0.0218364	1.66082
AC090197.1	0	6	6	11	18	20	2.02975	0.0218539	1.66047
COBLL1	237	257	226	309	283	276	0.269698	0.0218539	1.66047
PIK3IP1	285	449	455	630	574	680	0.66405	0.0218641	1.66027
LINC01119	17	20	22	46	31	52	1.12858	0.0219816	1.65794
LRRC4	3	0	0	5	10	11	3.11548	0.0220304	1.65698
AL356215.1	1	5	3	19	25	11	2.61143	0.0220304	1.65698
AC003092.1	1	2	2	9	12	20	3.03562	0.0220318	1.65695
PARD3	558	752	636	852	856	853	0.396196	0.0220326	1.65693
HSF2BP	54	74	76	97	91	95	0.472233	0.0220372	1.65684
GPR1	314	391	357	279	268	269	-0.380143	0.0220469	1.65665
PLEKHF1	45	46	37	161	91	108	1.49185	0.022049	1.65661
C11orf95	419	618	564	775	732	859	0.563477	0.0220597	1.6564
FICD	230	309	297	410	354	398	0.475035	0.0220702	1.65619
RAPGEF6	280	311	304	407	341	406	0.366684	0.0221123	1.65537
GTF2E1	193	250	216	158	130	161	-0.553563	0.0221305	1.65501
ZNF513	42	51	51	72	67	91	0.675565	0.0222053	1.65354
SMNDC1	364	506	488	628	601	686	0.495861	0.0222296	1.65307
SDAD1P1	29	43	41	61	64	86	0.90092	0.022265	1.65238
H3F3C	2	3	4	11	6	9	1.53051	0.0222699	1.65228
AL021392.1	12	16	17	28	30	21	0.811928	0.0222699	1.65228
BEND3	131	182	140	253	201	252	0.640157	0.0222944	1.6518
FITM2	264	308	279	240	224	237	-0.279745	0.0223785	1.65017
AC012651.1	12	10	12	7	9	6	-0.628031	0.0223942	1.64986
PSG5	2	4	4	9	7	6	1.1375	0.0223942	1.64986
AC009041.4	6	8	8	3	5	2	-1.1375	0.0223942	1.64986
PXYLP1	211	254	221	183	170	184	-0.353286	0.0225234	1.64737
DPH7	263	269	253	230	200	232	-0.245861	0.0225285	1.64727
ZNF780A	160	178	166	142	99	116	-0.4975	0.0225755	1.64636
DLGAP4	2000	2992	2669	3737	3467	3850	0.528964	0.0225879	1.64612
KIAA1614	33	41	47	64	53	60	0.548742	0.0226113	1.64568
WNT3	95	83	91	157	121	123	0.575996	0.0226377	1.64517
POLR3A	1106	1313	1158	2325	1607	1984	0.725872	0.0227251	1.64349
CEP95	126	158	126	205	170	201	0.490445	0.022737	1.64327
INAVA	25	32	32	50	50	72	0.950531	0.0228571	1.64098
LONRF2	3	10	10	18	25	17	1.38333	0.022885	1.64045
ELF1	377	545	451	618	643	644	0.472459	0.0228931	1.6403
USF1	335	443	353	277	215	206	-0.6963	0.0229102	1.63997
CD163L1	5	4	3	14	8	10	1.41504	0.0229187	1.63981
WFDC21P	0	2	0	5	8	12	3.64386	0.022921	1.63977
MRPS24	554	664	605	1105	821	885	0.624769	0.0229264	1.63966
FAM122A	155	192	154	122	99	122	-0.546602	0.0229432	1.63935
AC087854.1	1	1	4	11	8	6	2.05889	0.0229483	1.63925
DDX21	3295	4317	3669	5284	4654	5194	0.423708	0.0229536	1.63915
ZNF445	423	534	463	372	343	336	-0.434128	0.0229936	1.63839
DNAJB6	1308	1827	1809	2482	2157	2541	0.538305	0.0230275	1.63775
KLHL22	310	406	371	270	258	252	-0.478806	0.0230631	1.63708
RRP12	944	1508	1148	1965	1701	1903	0.629421	0.0230854	1.63666
SLC6A6	1025	1068	1175	935	724	754	-0.43758	0.0231364	1.63571
PDLIM4	749	1144	1094	1551	1368	1574	0.588982	0.0231757	1.63497
THOC6	151	89	104	258	182	214	0.926882	0.0232111	1.6343
RPL23AP2	8	9	9	10	12	12	0.387023	0.0232152	1.63423
AC007879.3	1	1	0	4	2	4	2.32193	0.0232152	1.63423
C9orf43	5	6	5	13	11	8	1	0.0232152	1.63423
AC083799.1	16	17	8	24	26	23	0.832273	0.0232152	1.63423
GUCA1B	5	4	4	1	3	1	-1.37851	0.0232152	1.63423
JAZF1	184	295	306	472	379	448	0.726637	0.0232434	1.6337
WASH5P	143	146	152	180	169	203	0.32389	0.0233472	1.63177
ZSCAN9	110	155	112	189	175	177	0.521064	0.0233875	1.63102
RPUSD2	118	163	132	94	85	89	-0.623909	0.0234283	1.63026
SCAF8	737	904	884	1303	1045	1155	0.472308	0.0234676	1.62953
C2orf68	192	217	222	175	126	149	-0.487715	0.0234845	1.62922
TIGD1	53	53	45	42	36	39	-0.36804	0.0234981	1.62897
KPNA4	1703	2296	1907	2825	2482	2847	0.465327	0.0235133	1.62869
SMIM15	509	577	539	746	639	808	0.432466	0.023519	1.62858
RIOK3	614	1076	913	1384	1294	1482	0.676408	0.0235757	1.62753
KCTD21	317	382	393	284	265	282	-0.394052	0.0236769	1.62568
YARS	1917	2325	2209	3213	2602	2920	0.437285	0.0236888	1.62546
CASZ1	12	4	7	33	21	20	1.68589	0.0237274	1.62475
RNF149	352	481	438	559	585	673	0.515594	0.0237917	1.62357
PGBD4	55	87	76	40	39	39	-0.885541	0.0238228	1.62301
PHF23	923	1245	1004	645	626	768	-0.637531	0.0238471	1.62257
SLITRK5	286	315	297	265	215	240	-0.318719	0.0238574	1.62238
ZNF250	85	144	117	54	60	42	-1.14923	0.023858	1.62237
AC105411.1	1	6	4	10	10	8	1.34792	0.0239112	1.6214
MUC20-OT1	236	313	290	211	177	185	-0.550136	0.0239376	1.62092
PDCD1LG2	323	423	347	529	498	648	0.615868	0.0239532	1.62064
CDK5R1	39	45	38	86	62	62	0.783508	0.0240779	1.61838
TCF7L2	654	808	848	1050	947	1019	0.384744	0.0240891	1.61818
WAC	1514	1900	1748	2456	2078	2291	0.402899	0.0240965	1.61805
CBARP	90	168	143	215	216	214	0.685697	0.024103	1.61793
AC009065.1	1	1	0	2	2	3	1.80735	0.0241101	1.6178
FOLR3	1	1	0	2	3	2	1.80735	0.0241101	1.6178
HNRNPA1P54	0	1	1	2	2	3	1.80735	0.0241101	1.6178
RPL7P15	1	0	1	2	2	3	1.80735	0.0241101	1.6178
TIGD3	1	0	1	2	3	2	1.80735	0.0241101	1.6178
TTPA	1	1	0	3	2	2	1.80735	0.0241101	1.6178
TMCC2	109	142	120	186	155	170	0.461904	0.0241101	1.6178
AC104563.1	6	4	4	2	0	2	-1.80735	0.0241101	1.6178
SNHG25	2	3	2	1	0	1	-1.80735	0.0241101	1.6178
PDE4B	19	18	15	43	26	38	1.04103	0.0241101	1.6178
SETBP1	86	141	120	172	169	191	0.616491	0.0241101	1.6178
CSGALNACT1	3	4	3	2	2	1	-1	0.0241101	1.6178
PTOV1-AS1	14	20	19	24	25	24	0.461904	0.0241101	1.6178
CHRFAM7A	32	34	25	21	20	15	-0.70044	0.0241101	1.6178
ZFP14	39	44	63	20	22	25	-1.12374	0.0241655	1.61681
FZD2	1567	2060	2178	1364	1183	1161	-0.646655	0.0241735	1.61666
SMAD2	1011	1258	1121	1550	1349	1468	0.365357	0.0242205	1.61582
ATP13A3	4627	6531	5492	7687	7242	8034	0.463789	0.0242427	1.61542
C6orf141	29	31	20	65	42	69	1.1375	0.0242517	1.61526
MLLT11	622	728	690	952	840	1095	0.501002	0.0242896	1.61458
AARS2	349	405	360	298	208	272	-0.517907	0.0243028	1.61434
HELB	31	29	26	112	73	62	1.5221	0.0244125	1.61239
HSP90AA1	17059	19067	16142	31054	22817	25552	0.603629	0.0244508	1.61171
PNPLA3	98	138	128	181	158	170	0.483727	0.0244528	1.61167
PTBP3	797	1008	811	1455	1120	1290	0.563106	0.0244605	1.61153
GRPEL2	174	232	188	483	321	349	0.956858	0.0244815	1.61116
ZNF207	2242	2604	2230	3425	2787	3264	0.421344	0.0245255	1.61038
PUM3	456	618	500	826	675	760	0.522525	0.0246046	1.60898
LATS1	497	738	647	991	846	907	0.544014	0.0246852	1.60756
PCSK4	27	24	33	18	19	13	-0.748461	0.0247427	1.60655
USP42	190	308	268	388	364	428	0.623371	0.024751	1.60641
RALGAPA1P1	46	81	57	126	101	99	0.825166	0.0247515	1.6064
PPID	463	660	578	886	752	794	0.51576	0.0247603	1.60624
GLRX2	202	249	199	287	268	275	0.352672	0.0247635	1.60619
VASN	2934	5011	4804	6887	6319	6709	0.643471	0.024784	1.60583
FTH1P10	50	61	62	84	79	106	0.636834	0.024879	1.60417
MTCO3P12	2	2	4	5	5	5	0.906891	0.0248962	1.60387
DNAJC3-DT	16	15	14	18	19	22	0.39079	0.0248962	1.60387
PBX2P1	1	0	1	3	4	2	2.16993	0.0248962	1.60387
AC008687.7	0	2	1	4	3	3	1.73697	0.0248962	1.60387
AC104447.1	22	25	31	18	14	11	-0.859137	0.0248962	1.60387
AC026704.1	6	5	4	3	2	3	-0.906891	0.0248962	1.60387
AC009962.1	3	4	2	0	1	1	-2.16993	0.0248962	1.60387
IGSF5	2	4	3	0	1	1	-2.16993	0.0248962	1.60387
RASGRF1	6	5	4	7	8	7	0.552541	0.0248962	1.60387
RBM26-AS1	18	19	18	16	17	15	-0.196397	0.0248962	1.60387
FAM214B	805	1289	1344	2028	1659	1870	0.692737	0.0249156	1.60353
DCAF4	158	231	193	307	255	298	0.563318	0.0249406	1.60309
AVPI1	145	159	151	287	231	202	0.66213	0.0250087	1.60191
AL138724.1	23	20	16	129	70	69	2.18345	0.0250313	1.60152
EP300	1328	1822	1600	2153	2010	2233	0.429242	0.025034	1.60147
SMG9	753	927	835	1186	1007	1079	0.379614	0.0251406	1.59962
MAP3K13	235	338	324	408	406	430	0.471807	0.0251602	1.59929
TRIM11	310	422	371	546	462	524	0.473984	0.0251624	1.59925
NBPF12	168	209	221	281	247	267	0.410809	0.025207	1.59848
STAM	511	645	600	825	701	812	0.412982	0.0252293	1.5981
DDX58	355	380	368	707	483	593	0.692874	0.0252711	1.59738
AKAP8	351	434	390	323	268	263	-0.460353	0.0253027	1.59683
KLHL2	171	192	196	319	231	303	0.609697	0.0253276	1.59641
NT5C2	1421	1968	1731	2615	2167	2515	0.51116	0.0253826	1.59546
NOTUM	1	2	3	7	6	4	1.5025	0.0253864	1.5954
AC009093.9	0	0	1	5	5	2	3.58496	0.0253864	1.5954
AL355607.2	1	0	0	5	5	2	3.58496	0.0253864	1.5954
ST7-OT4	0	1	0	5	5	2	3.58496	0.0253864	1.5954
AL445985.1	5	3	0	12	7	11	1.90689	0.0253864	1.5954
EOMES	1	1	2	4	4	7	1.90689	0.0253864	1.5954
RAB33A	3	1	0	4	5	6	1.90689	0.0253864	1.5954
TTC6	0	3	3	6	6	5	1.5025	0.0253864	1.5954
RASAL2	1142	1698	1519	2077	1955	2239	0.524698	0.0254419	1.59445
TRIM16	995	1279	1269	2014	1549	1704	0.57201	0.0254611	1.59412
AC243964.3	9	5	6	2	2	3	-1.51457	0.0254815	1.59378
AL731569.1	10	7	9	6	3	4	-1	0.0254815	1.59378
LRRFIP1	2047	2525	2259	3021	2672	2982	0.344767	0.0254984	1.59349
EPS15L1	441	542	490	701	603	613	0.380093	0.0255955	1.59184
SMURF2	1776	3133	2695	3841	3901	4366	0.67113	0.025629	1.59127
C19orf47	179	214	209	169	136	138	-0.442457	0.0256299	1.59125
PFDN1	870	1137	1089	1457	1265	1450	0.430334	0.0256645	1.59067
AC127070.4	1	1	1	2	3	4	1.58496	0.0257214	1.58971
LAG3	2	4	3	8	5	8	1.22239	0.0257214	1.58971
LIPT2	16	15	14	12	9	12	-0.447459	0.0257214	1.58971
DPY19L1P1	7	8	9	6	3	3	-1	0.0257214	1.58971
DLK2	23	19	15	6	9	12	-1.078	0.0257214	1.58971
BX322650.1	4	2	3	1	1	1	-1.58496	0.0257214	1.58971
S100A1	6	5	4	3	0	0	-2.32193	0.0257214	1.58971
PLEKHA8P1	39	62	36	76	73	91	0.808859	0.0258095	1.58822
KIF16B	178	218	214	272	243	291	0.401971	0.0258187	1.58807
DMRTA1	229	259	213	284	356	369	0.52544	0.0258225	1.588
PRPF38B	598	743	641	895	793	953	0.414127	0.0258706	1.58719
TMEM87A	776	1023	964	1209	1144	1272	0.391745	0.0259089	1.58655
LINC02802	36	25	31	19	13	20	-0.823122	0.0259246	1.58629
CALCOCO2	666	731	654	837	758	859	0.258808	0.0259554	1.58577
RCE1	163	192	195	306	245	241	0.526069	0.0260352	1.58444
RNF113A	100	143	157	82	63	68	-0.909147	0.0260551	1.58411
HYLS1	62	44	41	30	16	21	-1.13358	0.0260772	1.58374
OTUB2	64	77	63	54	52	49	-0.396301	0.026111	1.58318
PRUNE1	209	265	267	165	187	181	-0.475338	0.0261125	1.58315
CREB3L2	3522	4594	4099	5892	4962	5888	0.454818	0.0261252	1.58294
PARS2	83	108	88	52	32	66	-0.895303	0.0261394	1.5827
TMEM168	205	247	251	298	277	294	0.305831	0.0261584	1.58239
CBLB	294	456	476	602	711	840	0.812389	0.0262079	1.58157
LINC02154	2	0	1	29	10	28	4.48113	0.0262778	1.58041
PTPN21	587	991	882	1296	1182	1429	0.667403	0.0262868	1.58026
BLOC1S2	537	792	658	1062	879	1131	0.628586	0.0263796	1.57873
AC018638.5	47	59	51	63	70	75	0.405819	0.0265203	1.57642
AC008393.1	4	0	3	10	6	11	1.94753	0.0265363	1.57616
LRRC15	4	6	5	13	8	14	1.22239	0.0265363	1.57616
PCSK1	12	10	9	14	17	20	0.718229	0.0265363	1.57616
FCHSD2	428	617	565	791	696	779	0.493087	0.0265904	1.57527
ZNF703	1472	2536	2127	906	966	1049	-1.0706	0.0266141	1.57489
HECTD3	716	833	727	648	510	546	-0.417575	0.0266629	1.57409
TRMT5	287	380	305	242	208	189	-0.60514	0.0266977	1.57353
CDK3	31	17	10	46	38	55	1.26096	0.0267096	1.57333
SRGAP2C	278	275	296	445	338	390	0.466367	0.0267845	1.57212
AC078785.1	4	6	14	17	25	28	1.54432	0.026801	1.57185
SECISBP2	477	559	484	747	612	652	0.403842	0.0268056	1.57178
EMP1	1049	1057	935	1626	1283	1319	0.47543	0.0268176	1.57158
RRP8	191	272	230	163	139	122	-0.708791	0.026844	1.57115
GFPT2	434	691	603	853	823	830	0.536283	0.0269155	1.57
SBNO2	655	836	819	1198	960	1071	0.483195	0.0269626	1.56924
SLC36A4	230	265	239	204	212	208	-0.234234	0.026963	1.56923
LINC00520	1	0	2	10	4	8	2.87447	0.0269653	1.56919
HOPX	4	3	4	7	12	8	1.29546	0.0269973	1.56868
POLR1B	425	554	491	387	298	304	-0.571774	0.0270472	1.56788
ZNF692	205	236	224	195	160	167	-0.349305	0.0271097	1.56687
AC016734.1	3	6	10	13	13	14	1.074	0.0271108	1.56686
SEMA7A	6867	8632	8369	11766	9593	11651	0.467825	0.0271337	1.56649
STK3	149	167	174	224	188	209	0.341812	0.0271474	1.56627
CLASRP	272	338	271	407	373	364	0.376873	0.0271526	1.56619
HERC2P2	568	826	803	489	416	412	-0.73828	0.0271539	1.56617
AC022364.1	27	21	18	61	35	53	1.17477	0.0272104	1.56527
MED6	191	243	214	278	260	295	0.362323	0.0272104	1.56527
TENT5A	713	1563	1211	292	371	295	-1.86389	0.027273	1.56427
RILP	39	31	36	67	61	46	0.715023	0.0272773	1.5642
STARD5	22	31	22	36	39	34	0.539366	0.0272773	1.5642
KCTD9	484	594	500	766	636	695	0.41023	0.0272881	1.56403
WDCP	229	235	194	181	130	145	-0.529054	0.0273045	1.56377
NHLRC3	124	152	133	168	166	190	0.357466	0.0273135	1.56362
AC107956.1	11	15	29	44	34	40	1.10128	0.0273596	1.56289
SMIM8	25	25	28	48	36	36	0.621488	0.0273907	1.5624
SLC47A1	10	10	8	4	7	3	-1	0.0273907	1.5624
AC107027.3	40	50	48	29	37	33	-0.479168	0.0274156	1.562
ZNF646	365	518	410	615	562	608	0.465202	0.0274738	1.56108
AC104695.3	3	0	3	9	19	24	3.11548	0.0275004	1.56066
DNAJC2	279	399	313	498	430	482	0.508738	0.0275056	1.56058
HMGN4	495	605	555	858	665	793	0.484804	0.027541	1.56002
RNF150	10	21	12	32	35	54	1.4926	0.0275782	1.55943
TSNAXIP1	25	21	27	18	16	19	-0.461904	0.0277696	1.55643
EEF1AKMT3	149	192	169	119	119	135	-0.451322	0.0278413	1.55531
NPR2	73	90	83	60	45	64	-0.541635	0.0278711	1.55485
NLRP1	182	207	197	347	256	274	0.581676	0.0279596	1.55347
POLR3C	322	393	384	548	437	539	0.471672	0.027993	1.55295
[truncated: 17,567 more rows]

## Sheet: Not Significant
gene_name	Log2FC	log10 p-value
ZNF431	0.596103	4.81062
SENP7	0.551348	4.49781
AMIGO1	-0.847997	4.43317
GPATCH2	0.838155	4.04705
FBXW7	0.856452	3.76305
CCDC59	0.746001	3.68486
CLDND1	0.806492	3.61505
ATXN3	0.561194	3.53713
CYSTM1	0.778516	3.53652
H3F3B	0.815837	3.53631
SUOX	-0.560873	3.50964
SNN	0.965763	3.44075
GLRX	0.921079	3.4217
ACBD4	-0.541894	3.40484
PI4K2A	0.860974	3.38859
ZNF614	0.654322	3.35534
GMEB1	0.87618	3.32952
GPRC5A	0.9738	3.31527
KBTBD4	-0.724242	3.24818
TRMO	0.713696	3.23588
PIP5K1A	0.83255	3.22627
LRRC37B	0.839535	3.2197
AL162595.1	-0.396301	3.21631
RBM39	0.996546	3.20974
SDCBP	0.954639	3.20241
SYT1	0.641808	3.20143
ZNF525	-0.42414	3.17225
VPS37C	0.835802	3.16286
SOCS6	0.898232	3.16219
ARL17A	-0.447459	3.14647
ZNF394	0.891097	3.1361
TRAF4	0.904566	3.1169
MTHFD2	0.833966	3.10953
HOMER2	0.752072	3.10907
DHCR7	0.903379	3.10829
HRCT1	-0.889817	3.10511
JARID2	0.981842	3.09764
PTOV1-AS2	0.850424	3.09025
RCL1	0.577458	3.07929
PHLDA1	0.87606	3.06985
ZNF382	0.694013	3.03459
KRT8P12	0.814444	3.03005
BSDC1	0.706142	3.0284
IFIT1	-0.847997	2.99316
UGCG	0.81709	2.97964
DAXX	0.756876	2.97392
SLC10A7	0.925387	2.96813
PNISR	0.706814	2.9515
BPGM	0.656903	2.94259
JOSD1	0.969197	2.94234
AL109918.1	-0.855546	2.93399
AC098484.3	0.506353	2.93375
RANBP6	-0.947816	2.91931
LTO1	0.868461	2.90454
FDFT1	0.998627	2.88357
OSGIN2	0.948285	2.88261
UPP1	0.913878	2.87658
EIF1	0.969622	2.86512
DDX20	-0.923261	2.84741
SATB2	0.459056	2.8467
ADIPOR2	0.890363	2.83658
MED13L	0.964174	2.82342
TSHZ1	-0.498806	2.82294
SMURF1	0.896312	2.81188
THAP11	-0.987684	2.81132
PKNOX1	0.97341	2.80829
PARD6B	0.64075	2.80806
SLC35G1	0.982804	2.80484
GNA13	0.973208	2.80119
ZNF136	0.672569	2.7971
ZRANB1	0.885941	2.79215
C16orf72	0.887254	2.7915
DNAJA1	0.897506	2.78526
BCL2L2	0.5555	2.75279
ARL8A	0.747813	2.75151
ZNF804A	0.961137	2.75115
BCL2L11	0.882278	2.75052
PATL1	0.827794	2.75015
GPR176	0.735692	2.74886
TFPT	0.282765	2.74584
AC010969.2	-0.946982	2.74391
ZNF778	0.898049	2.74317
SMOX	0.919617	2.73366
RRAGC	0.953807	2.73282
MOSMO	0.747032	2.73231
BTG3	0.966357	2.72413
PPIL4	0.568042	2.71671
DCP1A	0.742191	2.71606
TM4SF1	0.576677	2.71538
SMCR8	0.668455	2.71279
SLC9A3-AS1	0.556618	2.71211
C2orf76	0.549557	2.70789
CACNB1	0.881109	2.70614
POGZ	0.581365	2.70587
SIAH2	0.934437	2.69292
MSL2	0.645247	2.69267
PLAUR	0.823695	2.68186
GLUD1P3	-0.902703	2.67558
CLCN6	0.665737	2.66155
SESN3	-0.908852	2.65343
LCMT2	-0.954088	2.65013
FBXO33	0.543418	2.64939
CYB5D1	0.77179	2.64453
HECA	0.802843	2.63622
STX16	0.493053	2.63556
TRIM39	0.61891	2.63531
RSRC2	0.803229	2.63328
ZNF182	-0.843598	2.62328
CHAC2	-0.604591	2.61799
SETD1A	-0.642541	2.61627
ZXDB	0.967263	2.60804
TEF	0.796086	2.60638
CREBZF	0.339714	2.60549
TNIP2	0.666563	2.59937
HERPUD2	0.760561	2.596
PHF12	-0.8355	2.59482
AC106820.4	-1	2.59227
C1orf74	-0.978467	2.58866
SDE2	0.711904	2.58377
ZBTB3	-0.579892	2.57515
MYC	0.694332	2.57282
LINC00847	-0.447861	2.56727
DYRK1A	0.821502	2.56436
PELI1	0.856875	2.56266
RGS14	0.546567	2.56129
SOCS3	0.741483	2.5606
RAB9A	0.680832	2.56039
MBD5	0.693356	2.55814
ADAM17	0.755007	2.55299
MIR1915HG	0.95109	2.55252
PPM1D	0.41717	2.5522
ZNF628	-0.457045	2.54834
MBD6	0.461218	2.54788
RBM33	0.897448	2.54464
RFFL	0.98673	2.54387
ZFAND5	0.768348	2.54296
ZNF473	0.946229	2.5428
ATP6V1B2	0.69732	2.54146
USPL1	0.707421	2.54057
CCN1	0.992994	2.536
GLIS1	-0.762184	2.53389
KBTBD11	0.81916	2.53184
YRDC	0.914416	2.52808
EPHA2	0.847878	2.52127
ANKRD36C	0.945552	2.51461
AL731577.2	0.691878	2.50859
IFNGR2	0.903258	2.50854
HS3ST3B1	0.940921	2.50789
VCPIP1	0.887138	2.50594
SPP1	0.388245	2.50483
CTDSPL	-0.489452	2.50276
AHR	0.4627	2.50181
C5orf51	0.917639	2.4974
CFAP57	-0.965235	2.49509
AZIN1	0.837029	2.49019
CYTH2	0.759933	2.48897
ZNF138	0.617629	2.48533
CLDN12	0.671112	2.48219
RSBN1L	-0.840522	2.47806
RAP2C	0.745372	2.47584
ZCCHC8	0.856846	2.47292
HIVEP3	0.861774	2.47177
NR3C1	0.99609	2.46957
AC083855.2	1	2.46817
RABGGTB	0.767154	2.46626
FBXO30	0.697219	2.46213
GMEB2	0.51631	2.46194
ZNF800	0.715023	2.4579
FLNC	0.883979	2.45104
CDKL5	0.830075	2.44469
VPS37A	0.483284	2.44374
ZC3H11B	0.736966	2.44343
AMMECR1L	0.936878	2.44256
VGLL4	0.740869	2.44243
RDH14	-0.652531	2.43795
ELL2	0.909957	2.43784
MICA	0.70874	2.43417
B4GALT5	0.803648	2.43165
WSB1	0.980517	2.42469
B4GALT1	0.923921	2.42273
CYLD	0.842711	2.42167
SHROOM1	0.651223	2.42063
S1PR2	0.914935	2.41778
ZFAND6	0.467923	2.41766
L34079.3	1	2.41364
LINC00997	-0.476903	2.41309
YWHAG	0.660065	2.4112
WBP4	0.699491	2.40924
RASA2	0.984893	2.40789
RAB23	0.801794	2.40717
MEF2D	0.977233	2.40418
SPATA5L1	0.920032	2.40089
DNAAF2	-0.600294	2.39994
RAPGEF2	0.649173	2.39562
EIF3J	0.524668	2.39131
FOXL2	-0.944291	2.39084
RNF38	0.905762	2.38659
PPP1R18	0.785677	2.3798
VEGFA	0.955038	2.37796
CYP27A1	-0.42701	2.37296
SLC4A7	0.504891	2.37139
ATAD2B	0.451048	2.3706
HSPA8	0.80396	2.36973
SLC43A2	0.936984	2.36212
MOCS3	0.505174	2.36142
ACSL3	0.767108	2.35857
TMEM39A	0.922614	2.35787
BRSK1	0.700749	2.3564
SCD	0.758361	2.35468
MARF1	-0.607726	2.35428
COQ10B	0.970771	2.34825
SIX3	-0.803831	2.34569
FAM118A	0.61193	2.34368
BAG4	-0.683952	2.34291
ARID4B	0.50948	2.3427
TNIP1	0.780873	2.33948
KCNJ2	-0.662559	2.33758
MTF1	0.651582	2.33591
C2orf42	0.581431	2.32486
PXMP4	-0.612977	2.32426
RASSF8	0.67203	2.31896
WBP2	0.725867	2.31548
ESCO1	0.735483	2.3082
GAB2	0.758671	2.30785
SPTBN4	0.93587	2.30522
C17orf80	-0.672901	2.30479
P2RY1	0.885541	2.29895
TAB2	0.666049	2.29122
PLEKHO2	0.938388	2.28533
ZNF622	0.830709	2.28506
MOAP1	0.788201	2.28276
AC027237.3	0.971113	2.28097
AKIRIN2	0.627915	2.28064
SNIP1	0.774675	2.27829
TGDS	0.790904	2.27708
SERPINB7	-0.289507	2.27343
DENND4A	0.668671	2.26974
SOX5	0.699798	2.26955
FAM217B	-0.681776	2.266
HS3ST3A1	0.664638	2.26545
ZBTB38	0.686602	2.26396
CEP120	0.557193	2.26285
ZFP28	0.88146	2.25292
WDR89	0.540955	2.25148
MED13	0.709454	2.24834
MROH6	0.717413	2.24443
ZNF91	0.791671	2.24367
MAP3K2	0.637937	2.241
MEX3C	0.763635	2.23986
ADAMTS6	0.681484	2.23921
ZNF212	0.96909	2.23869
FAM160A2	0.634252	2.23836
PPARG	0.602036	2.23791
PANX1	0.740655	2.23771
ZNF615	-0.934905	2.23195
RNF166	0.976232	2.23082
PLEKHM3	0.484057	2.22933
ETNK1	0.713302	2.22771
CPT1C	-0.380126	2.22446
LINC01465	0.532495	2.22438
AC018638.4	0.504043	2.2242
RAP1B	0.720495	2.22209
CARS	0.752051	2.22165
NANP	0.778346	2.22046
IFNGR1	0.814068	2.21649
ZNF644	0.613559	2.21645
ZBTB2	0.555576	2.21637
TMEM41B	0.570847	2.21534
ARHGAP5	0.882396	2.21501
SELPLG	0.997889	2.21476
NR2F2	-0.835871	2.21455
RNF103	0.56498	2.21378
AC005519.1	-0.710493	2.21309
CEP112	0.506062	2.21267
AC073072.1	0.925999	2.20626
SEC24A	0.834011	2.20597
TXNRD1	0.779801	2.20511
SH3RF2	0.844712	2.20228
GEMIN6	-0.81681	2.20071
MYOSLID	0.840343	2.20067
TAF7	0.430204	2.20018
SPAG9	0.783172	2.1997
ERVK13-1	-0.5603	2.19764
PEX11A	-0.612184	2.1957
ID1	-1	2.1953
KHDC1	-0.732716	2.19527
ZNF562	0.543894	2.19247
RNASEL	-0.383915	2.18984
OTUD7B	0.69291	2.18964
PRDM2	0.798366	2.18851
SERPINE1	0.846336	2.18515
MAT2A	-0.754761	2.18241
MTURN	0.707385	2.18067
SS18L1	0.757238	2.17933
CDK17	0.683234	2.17841
RB1CC1	0.737726	2.17821
MDM2	0.722765	2.1777
GLI2	-0.842991	2.17648
THAP6	0.483083	2.17218
BRD4	0.63768	2.17216
NIFK	0.709362	2.17157
SETD5	0.646913	2.17126
INAFM1	0.77329	2.1708
TAP1	0.751378	2.17064
DYRK2	0.819576	2.16924
NAPA-AS1	0.606658	2.16894
TAF9	0.512307	2.16736
PITPNB	0.641106	2.16642
RGS3	0.685382	2.16566
KIF21A	0.51596	2.16476
GJC1	0.929727	2.16435
HS6ST1	-0.432675	2.16366
ZNF316	0.752713	2.16316
KRCC1	0.583412	2.15873
SPEN	0.662155	2.15777
MRM2	-0.57235	2.14498
UBN2	0.513233	2.14467
ITSN2	0.78223	2.14207
ZNF2	-0.988191	2.13997
PDCD7	0.656276	2.13951
CCNT1	0.617928	2.13858
ZNF746	0.401406	2.13616
CSRNP3	0.860597	2.13228
MAML3	0.637075	2.13207
ZNF808	0.921145	2.13162
KMT2C	0.620076	2.13103
OGA	0.76961	2.12989
AL031985.3	0.99444	2.12971
FASN	0.750549	2.12823
ZC2HC1A	0.506575	2.12738
ZNF317	0.708991	2.1261
RPARP-AS1	-0.636801	2.12605
FAM228B	0.497252	2.12549
FOXA1	0.925146	2.12474
PIGP	0.279636	2.12278
BMF	-0.307893	2.12129
AC067852.2	-0.869939	2.12067
AMIGO2	0.95315	2.11981
PEX11B	-0.551582	2.11967
UVSSA	0.483385	2.11701
CAAP1	0.438121	2.11383
MAST4	0.882447	2.11001
SLC22A23	0.523562	2.10999
MRPL45P2	0.928447	2.10999
HIF1A-AS3	-0.765535	2.10999
SPATA7	-0.437532	2.10949
RNF6	0.708081	2.10949
PIP4P1	0.752798	2.10865
UBE2D3	0.517526	2.10628
INTS5	-0.701357	2.10537
AC025171.2	0.862496	2.10371
ATF2	0.664777	2.10367
RNF213-AS1	-0.596103	2.10056
EHBP1	0.562711	2.09926
CCDC82	0.47468	2.09818
FRS2	0.9231	2.09578
SGMS1	0.745617	2.09459
KLF12	0.620538	2.09424
CRY1	0.889984	2.09262
GLIS3	0.795374	2.09224
TOB2	0.915175	2.09154
SLC25A32	0.720608	2.09062
RBM15	0.761906	2.08943
PTPRR	0.73372	2.08918
CSTF1	-0.974874	2.08798
TENT4A	0.6289	2.08763
ZNF784	-0.703383	2.08712
MAPK1IP1L	0.656218	2.08701
DNAJB2	0.806291	2.08692
AC025423.2	0.644125	2.08678
ZMIZ1-AS1	0.854802	2.08527
MT2A	0.734757	2.08442
BNIP1	0.525374	2.0837
PGM2L1	0.604173	2.07696
RFX3	0.892459	2.07361
CELSR3	0.80487	2.07306
SGMS2	0.654241	2.07269
EIF4ENIF1	-0.70411	2.07126
AL135925.1	0.755847	2.06707
C3orf62	-0.641313	2.06483
ATOH8	-0.765932	2.06341
ZNF674	0.966614	2.0583
ERICD	0.912537	2.05782
CDK9	-0.518056	2.05671
INSR	0.56061	2.05611
LARP6	0.51716	2.05386
ELOA-AS1	-0.852443	2.05277
PNRC1	0.918316	2.05179
B3GNT2	0.720183	2.05105
OTUD4	0.720733	2.04847
WWC2-AS2	0.726982	2.04716
TMEM41A	-0.315385	2.04662
RELA	0.683714	2.04432
ZNF101	0.803037	2.04354
RRS1	-0.810874	2.04085
GNE	0.671767	2.04038
MTMR3	0.751981	2.03973
AL049840.4	0.465974	2.03766
ATP23	-0.302029	2.03593
ERCC6	-0.576628	2.03516
AKAP12	0.884507	2.0344
ZNF410	0.477282	2.03433
MAML2	0.723721	2.03104
ZSCAN2	-0.710493	2.03094
KRIT1	0.443959	2.02847
ZFHX3	0.674389	2.02761
ZNF546	0.985645	2.02719
ZNF584	-0.870533	2.02673
SNHG17	0.427421	2.02396
KDM2A	0.715104	2.0202
CD70	0.917538	2.01908
PTPDC1	0.828088	2.0179
TFE3	0.509961	2.01771
EIF5A2	0.437861	2.0158
AMBRA1	0.504399	2.01464
RHEB	0.508147	2.0134
SIK2	0.448247	2.01277
SCN2A	-0.697562	2.01266
BRAF	0.580407	2.01245
CFB	0.721536	2.01097
MT-RNR2	0.924723	2.01039
TNKS1BP1	0.723342	2.01008
SMAD1	0.791325	2.00633
TUT7	0.623981	2.00571
MSANTD4	0.587153	2.00498
AGAP6	-0.910565	2.00421
TIMP3	0.946982	2.00418
SH3BP5-AS1	-0.748128	2.00378
IQCD	0.695145	2.00332
JAG1	0.980564	2.00151
ZNF419	0.449426	2.00113
LRRC49	0.909868	2.00052
PDE7A	0.542527	2.00026
CNOT4	0.665044	1.99983
ZNF24	0.405389	1.99814
ID3	0.499266	1.99689
ZNF823	0.985203	1.99614
RALGAPA1	0.566572	1.99556
AVL9	0.628935	1.99535
SHOX2	0.197695	1.99533
NCBP2AS2	-0.563267	1.99506
SESTD1	-0.415523	1.99495
RAPGEFL1	-0.506062	1.99325
ZCCHC9	0.518903	1.99285
RNF217	0.711224	1.99149
ZNF438	0.473931	1.99118
ZNF658B	-0.68281	1.99118
NBPF26	0.690289	1.99034
USP30	-0.749418	1.98994
ASB1	0.651655	1.98967
NRAV	0.433128	1.98918
FZD7	0.935008	1.98871
HECTD2	0.893568	1.98802
RSBN1	-0.807926	1.98785
NSUN5	0.464713	1.98597
RAB22A	0.458775	1.98562
IPPK	0.621684	1.98441
NDEL1	0.826289	1.98219
CREBBP	0.505243	1.9796
BLOC1S3	0.60598	1.9787
PURB	0.550533	1.97865
AL391422.4	0.747412	1.97821
TULP3	0.413023	1.97765
KATNBL1	0.424631	1.97623
KCMF1	0.506185	1.97538
TOB1	-0.505194	1.97489
AC012313.1	-0.393385	1.97402
PDE3A	0.692571	1.97388
PPP2R2A	0.458598	1.97224
NOP14-AS1	0.770415	1.97219
NOTCH2NLA	0.660556	1.97206
PTPN2	0.665752	1.97119
MEF2A	0.632299	1.97086
THAP1	0.538915	1.97074
POLR3D	0.631613	1.96938
ZBTB14	-0.280901	1.96922
HSPA9	0.621328	1.96618
LENG8	0.624752	1.9657
SYT16	0.794775	1.96441
ZNF710-AS1	-0.988126	1.96369
HDAC5	0.428728	1.96223
TADA1	-0.812768	1.96006
ZNF416	0.837943	1.95619
TMEM268	0.555463	1.95566
WDR37	0.611362	1.9549
PHLDA3	0.747549	1.95429
NRBF2	0.704289	1.9539
SRSF3	0.553305	1.95213
AHDC1	-0.907049	1.9505
LAMTOR3	0.550424	1.94955
FOXO1	0.846291	1.94912
MAP2K7	-0.397955	1.94826
CWC25	0.714598	1.94665
ZNF609	0.511714	1.94564
BAZ2B	0.627022	1.94466
AC118549.1	0.470727	1.94371
MEX3D	0.65621	1.94363
BASP1	0.657474	1.94253
INO80	0.576112	1.94196
LYSMD1	-0.349746	1.94178
RPL10P9	-0.710493	1.94131
F8	-0.226135	1.94131
NOVA1	0.450428	1.94021
SMN2	0.419903	1.94004
KIAA0355	0.670317	1.93972
SHISA2	-0.714713	1.93972
B3GALT5	0.403603	1.93931
SLU7	0.578946	1.93848
ATP8B1	0.567728	1.93823
LARP1B	0.572604	1.93547
HUS1	0.393508	1.93345
GUSBP11	-0.434146	1.93299
CHKA	0.591491	1.93295
PCLO	0.736966	1.93242
ARL8B	0.529512	1.93085
FBXO8	0.655803	1.93064
CELF1	0.485262	1.93042
C22orf39	-0.255839	1.93038
KAT6B	0.442232	1.92918
SLC50A1	0.465905	1.92784
EXOC8	0.603987	1.92689
ZFPM2	0.630975	1.92609
ZFAND1	0.377826	1.92605
TMEM51	0.634764	1.92601
PPP2CB	0.71898	1.9241
WBP1L	0.590329	1.92091
ARVCF	0.678072	1.92058
AL391244.2	-0.862496	1.92049
LRRC8C	0.731836	1.91946
NSDHL	0.889859	1.91777
ASB8	-0.6584	1.91701
MYO10	0.60076	1.91684
ZNF586	0.577185	1.91666
TTBK2	0.674708	1.91627
GPBP1	0.696391	1.91579
ZBTB37	0.503375	1.91531
RTN4	0.537607	1.91475
ARMCX5	0.545351	1.91321
AMD1	-0.481896	1.91187
ATXN2L	0.735082	1.91065
E2F3	0.519948	1.91038
DUSP3	0.538358	1.90933
C16orf70	-0.447971	1.90916
GARS	0.657498	1.90901
AC007238.1	-0.253757	1.90839
LYPD1	-0.584963	1.90721
FBXL3	0.496801	1.90593
WWC1	0.808249	1.90537
MIR137HG	0.531928	1.90368
GATA6-AS1	0.773724	1.90306
AFF4	0.691761	1.90213
NCOA2	0.33791	1.9019
TNIK	0.586996	1.90184
TBC1D15	0.430549	1.90157
ZMYM3	-0.482782	1.89981
ZNF506	0.922463	1.89958
ACVR1B	0.476037	1.8979
INO80C	0.733547	1.89779
GBP3	0.602627	1.89763
RAB11FIP5	0.576186	1.89734
ELF2	-0.418604	1.89721
MARK3	0.605652	1.89552
ZNF284	-0.787271	1.89482
SLC2A1	0.671197	1.89245
RAI1	-0.767658	1.8919
GATAD1	0.597225	1.8915
CASP9	0.195324	1.89145
RALA	0.764225	1.88995
NDUFB2-AS1	0.852443	1.88973
ZNF180	-0.750022	1.88939
CNST	0.678072	1.88924
MT1X	0.852487	1.88917
JRK	-0.966175	1.88835
MED11	-0.353147	1.88634
RSL24D1	0.677292	1.88378
TNFRSF12A	0.670571	1.88204
TCP11L1	0.540277	1.88165
SH3RF1	0.817931	1.88136
AC103740.2	0.825971	1.88081
MINDY4	0.807355	1.87826
TJAP1	0.664475	1.87819
ASAP1	0.536533	1.87812
SUPV3L1	0.545616	1.87695
BAK1	0.663774	1.87548
CDK7	0.848626	1.87415
ETF1	0.540934	1.87346
LAMB3	0.804391	1.8723
PLEKHM1P1	0.443419	1.87036
GATAD2B	0.522655	1.87
AP000704.1	0.903785	1.86924
RUSC2	0.671654	1.8687
CEP135	0.813122	1.86824
PALB2	-0.183138	1.86805
DHX34	0.563011	1.86709
URGCP	0.552839	1.86709
SCYL3	-0.691878	1.86642
TAF1D	0.614727	1.86582
SNX8	0.589408	1.86569
LINC01006	0.736966	1.86477
AKAP5	-0.529858	1.86428
PRPF39	0.898841	1.86428
KDM8	-0.682518	1.86401
CBX4	-0.798638	1.86393
NECAB3	0.471532	1.8634
CLCN4	0.431876	1.86338
ZNF529	0.711943	1.86246
TCF20	0.542846	1.86198
EID2	-0.904652	1.86084
ZFYVE1	0.579775	1.86033
TSPYL2	0.678583	1.85897
HBP1	0.679416	1.85738
FMNL2	0.510026	1.85681
DSEL	0.454637	1.85639
POLR1C	-0.629085	1.85563
MAGOHB	0.127875	1.85327
ZC3H6	0.325211	1.85141
ZBTB22	0.540672	1.8513
MMACHC	-0.451211	1.85119
CHMP2B	0.711362	1.84963
CCDC51	-0.744743	1.84825
MOB3C	0.82785	1.8482
ACBD5	-0.343749	1.84608
SLC25A37	0.68703	1.84258
ZNF66	0.662965	1.83824
LIMA1	0.759577	1.83791
ARHGEF2	0.897364	1.83758
ASB3	0.349678	1.83722
AC007406.5	-0.635946	1.83588
LYSMD3	0.589514	1.83504
KMT5A	0.5605	1.83458
TOLLIP	0.581002	1.83438
AC004889.1	0.66326	1.83392
ACKR3	0.867061	1.83298
AKAP3	0.947533	1.83207
ITGB6	0.373458	1.83207
GLS	0.657765	1.82974
MB21D2	0.708111	1.82942
PIK3CA	0.446043	1.82899
ATF7	0.463269	1.82707
SPINDOC	0.564559	1.82578
ZNF263	0.408682	1.82564
MOSPD2	0.633872	1.82522
ZNF365	0.567079	1.82477
PRTG	0.798774	1.82352
MT2P1	0.812721	1.82058
DIRAS1	0.776087	1.8194
TRIM66	-0.496062	1.81801
USP32	0.477148	1.81777
UIMC1	0.304932	1.81722
PPM1H	0.249359	1.81712
MAP4K3	0.494244	1.8124
RGMB	0.597627	1.81148
GATA6	0.729064	1.81017
TRIB2	-0.98302	1.80972
STAT3	0.583022	1.80844
TLK2	0.602225	1.80756
DSE	0.707744	1.80753
NOTCH2	0.568717	1.80706
BCORL1	-0.449919	1.80393
PISD	0.622058	1.80393
RLIM	0.54222	1.8039
PRDM4	0.766192	1.80382
MDM4	0.519374	1.80208
ZNF527	-0.744345	1.80181
ATP5MF-PTCD1	-0.949626	1.8018
CCDC142	-0.64261	1.80178
TRMT12	-0.625397	1.79769
KLHL28	0.987214	1.79655
GNAZ	-0.66458	1.79644
SPICE1	0.506429	1.796
MIR762HG	-0.657112	1.79558
ZNF613	-0.9631	1.79531
SDHAF1	-0.990662	1.79388
RIT1	0.801783	1.79373
CAMSAP1	0.543883	1.79309
EFNB1	0.588042	1.79263
AC021218.1	0.736966	1.79236
AC024060.2	-0.691878	1.79236
OAS2	-0.847997	1.79236
LINC01547	0.415037	1.79236
ZNF576	-0.525596	1.7911
RHEBP1	0.960829	1.79057
HNRNPA1P48	0.503111	1.79008
MED26	0.358018	1.78954
ZNF507	0.560198	1.78901
NIPBL	0.415037	1.78792
UBL3	0.49799	1.78717
PRMT6	-0.564339	1.78589
CBLL1	0.582119	1.78483
TET1	-0.405992	1.78344
MKRN2	0.604961	1.7819
ZBTB46	0.674759	1.78168
RAB2B	0.448668	1.78163
HINT3	0.684127	1.78159
SYNGAP1	0.411747	1.78132
PCNX2	0.453081	1.78118
OPTN	0.607951	1.78071
MAGI2-AS3	0.584963	1.77984
MBIP	-0.687261	1.77984
ANKRD50	0.527953	1.77897
HNMT	-0.874469	1.77526
ACVR1	0.540249	1.77409
SLC31A2	0.876852	1.77397
IQCJ-SCHIP1	0.785179	1.77325
SEPSECS	0.576426	1.77303
PDS5B	-0.392132	1.7723
NUDT6	-0.34915	1.77221
ZNF396	-0.824428	1.77212
BCL7B	0.501678	1.77071
IGF1R	0.700735	1.76965
AHSA1	0.499638	1.76943
MAP3K14	0.868286	1.769
ARHGAP32	0.523682	1.7687
DCLK2	0.648334	1.76862
RAPH1	0.659567	1.76852
FAM131A	0.870146	1.76602
PTPN12	0.44514	1.76519
TMEM251	0.793259	1.76412
CREM	0.517488	1.76058
PLPP6	0.754888	1.7605
ADSS	0.616692	1.75999
ELK3	0.482429	1.75868
LRCH1	0.732716	1.75695
KMT2E	0.558791	1.75636
C12orf65	-0.406517	1.75546
PCDH18	-0.527188	1.75329
SOX12	-0.615295	1.75251
ZNF641	0.955278	1.75117
TCEANC2	-0.675871	1.75021
PLD6	0.824503	1.74938
WASH4P	-0.97728	1.74673
ZNF655	0.441858	1.74542
NXT1	0.381498	1.74542
RPUSD1	-0.62341	1.74493
PPOX	-0.26748	1.74481
THAP9	0.82415	1.74244
DDAH1	0.648095	1.74198
SLAIN2	0.659506	1.74124
KAZN	-0.446886	1.74044
METTL23	0.598812	1.7395
MRPL18	0.495738	1.73885
RFLNB	0.574641	1.73871
ZNF189	0.662516	1.73837
PGPEP1	-0.519508	1.73818
DISC1	0.303781	1.7381
NR2F1	-0.983191	1.73547
NEU1	0.523588	1.73494
ANKRA2	0.520832	1.73466
BNC2	0.467581	1.73417
MRPL33	0.287943	1.73412
ZNF211	-0.614389	1.73407
SDSL	0.782176	1.73403
UCK2	0.592846	1.73375
MAP3K7CL	0.710782	1.73324
SRCAP	-0.401571	1.73041
ZBTB26	-0.531096	1.7294
RC3H1	0.572731	1.72933
EFHD2	0.754419	1.72933
FBRS	0.547439	1.72914
IRF7	0.933911	1.72913
PSEN1	0.54218	1.7291
OSBP2	0.871584	1.72841
ZNF776	0.264054	1.72831
TMEM121	-0.774933	1.72811
CASKIN2	-0.776237	1.72666
CASP4	0.507342	1.72591
CHD8	-0.476575	1.7234
WASL	0.462222	1.72328
THNSL1	-0.694321	1.72294
CAMSAP2	0.607333	1.72172
RIDA	-0.382003	1.71991
APLF	0.38247	1.71937
TRIM45	0.959358	1.71793
TMEM161B	0.343653	1.71775
LOX	0.891732	1.7166
LCOR	0.7088	1.71579
MAP3K10	0.63005	1.71575
OTUD3	0.773491	1.71357
PFKFB2	0.71015	1.71352
CHD2	0.719193	1.71303
GAN	0.792819	1.7128
APBA1	0.443607	1.71168
TEN1-CDK3	0.790077	1.71126
PLEKHA5	0.531352	1.71106
XKR8	-0.570985	1.70957
BLZF1	0.602544	1.70839
BDP1	0.498784	1.7076
CDAN1	-0.486325	1.70737
FOXO3B	0.581883	1.70662
ENO3	0.790281	1.70623
ENTPD7	0.710195	1.70601
F8A1	-0.501324	1.70485
SLC66A1	0.471306	1.70274
ARHGAP24	0.653982	1.70192
NT5C3A	0.47961	1.70188
PRRC2C	0.502367	1.70019
ZNF426	0.310021	1.69967
TMEM185B	0.502588	1.69955
HABP4	0.59656	1.69918
CNTLN	0.577873	1.69913
AFG3L1P	-0.575502	1.69528
DUS4L	0.531484	1.69427
DLC1	0.647156	1.69419
CSRNP2	0.671665	1.69276
C20orf194	0.725945	1.69071
PPP4R2	0.533346	1.68839
AC096536.2	1	1.68829
SPATA24	-0.719892	1.68829
PCF11	0.579157	1.68806
NCKAP5	0.788496	1.68805
DAPK3	0.63959	1.68768
SRGAP1	0.569996	1.68733
ZNF639	-0.563471	1.68718
EED	-0.69578	1.68638
NOL4L	-0.860259	1.68634
CCDC9	0.754218	1.68628
RERE	0.55802	1.68603
TIMM23B	0.587487	1.68586
TIMM9	0.458488	1.68572
DPM1	0.427618	1.6838
PIK3CD	0.949795	1.68332
ZNF331	-0.458833	1.68286
HSP90AB1	0.506844	1.6828
ZNF326	0.391915	1.68222
CSNK1G1	0.685206	1.68219
CAMTA1	0.313467	1.67871
GPER1	0.83289	1.67844
AC024075.2	-0.625934	1.67831
ATXN1L	0.572885	1.67678
AXIN1	0.518255	1.67568
ZNF680	0.402759	1.67333
E2F6	0.754005	1.67313
NUDT12	-0.321928	1.67299
ZNF430	0.391191	1.67193
PAIP2	0.491295	1.6716
PDP2	-0.511851	1.67146
AC010326.4	-0.378512	1.67138
DBR1	-0.882217	1.67107
CA13	0.9609	1.66947
SFPQ	0.608971	1.66738
EAF1	0.65385	1.66625
PLPBP	-0.286865	1.66536
LSM10	-0.335539	1.66423
AC060766.7	0.764187	1.66365
CLK4	0.492396	1.66322
UBAP1	0.427434	1.66305
PDP1	0.4668	1.66266
RAD54L2	0.421949	1.66242
PIGA	0.720798	1.66231
METTL15P1	0.74048	1.6623
AL135905.1	0.661198	1.66082
COBLL1	0.269698	1.66047
PIK3IP1	0.66405	1.66027
PARD3	0.396196	1.65693
HSF2BP	0.472233	1.65684
GPR1	-0.380143	1.65665
C11orf95	0.563477	1.6564
FICD	0.475035	1.65619
RAPGEF6	0.366684	1.65537
GTF2E1	-0.553563	1.65501
ZNF513	0.675565	1.65354
SMNDC1	0.495861	1.65307
SDAD1P1	0.90092	1.65238
AL021392.1	0.811928	1.65228
BEND3	0.640157	1.6518
FITM2	-0.279745	1.65017
AC012651.1	-0.628031	1.64986
PXYLP1	-0.353286	1.64737
DPH7	-0.245861	1.64727
ZNF780A	-0.4975	1.64636
DLGAP4	0.528964	1.64612
KIAA1614	0.548742	1.64568
WNT3	0.575996	1.64517
POLR3A	0.725872	1.64349
CEP95	0.490445	1.64327
INAVA	0.950531	1.64098
ELF1	0.472459	1.6403
USF1	-0.6963	1.63997
MRPS24	0.624769	1.63966
FAM122A	-0.546602	1.63935
DDX21	0.423708	1.63915
ZNF445	-0.434128	1.63839
DNAJB6	0.538305	1.63775
KLHL22	-0.478806	1.63708
RRP12	0.629421	1.63666
SLC6A6	-0.43758	1.63571
PDLIM4	0.588982	1.63497
THOC6	0.926882	1.6343
RPL23AP2	0.387023	1.63423
C9orf43	1	1.63423
AC083799.1	0.832273	1.63423
JAZF1	0.726637	1.6337
WASH5P	0.32389	1.63177
ZSCAN9	0.521064	1.63102
RPUSD2	-0.623909	1.63026
SCAF8	0.472308	1.62953
C2orf68	-0.487715	1.62922
TIGD1	-0.36804	1.62897
KPNA4	0.465327	1.62869
SMIM15	0.432466	1.62858
RIOK3	0.676408	1.62753
KCTD21	-0.394052	1.62568
YARS	0.437285	1.62546
RNF149	0.515594	1.62357
PGBD4	-0.885541	1.62301
PHF23	-0.637531	1.62257
SLITRK5	-0.318719	1.62238
MUC20-OT1	-0.550136	1.62092
PDCD1LG2	0.615868	1.62064
CDK5R1	0.783508	1.61838
TCF7L2	0.384744	1.61818
WAC	0.402899	1.61805
CBARP	0.685697	1.61793
TMCC2	0.461904	1.6178
SETBP1	0.616491	1.6178
CSGALNACT1	-1	1.6178
PTOV1-AS1	0.461904	1.6178
CHRFAM7A	-0.70044	1.6178
FZD2	-0.646655	1.61666
SMAD2	0.365357	1.61582
ATP13A3	0.463789	1.61542
MLLT11	0.501002	1.61458
AARS2	-0.517907	1.61434
HSP90AA1	0.603629	1.61171
PNPLA3	0.483727	1.61167
PTBP3	0.563106	1.61153
GRPEL2	0.956858	1.61116
ZNF207	0.421344	1.61038
PUM3	0.522525	1.60898
LATS1	0.544014	1.60756
PCSK4	-0.748461	1.60655
USP42	0.623371	1.60641
RALGAPA1P1	0.825166	1.6064
PPID	0.51576	1.60624
GLRX2	0.352672	1.60619
VASN	0.643471	1.60583
FTH1P10	0.636834	1.60417
MTCO3P12	0.906891	1.60387
DNAJC3-DT	0.39079	1.60387
AC104447.1	-0.859137	1.60387
AC026704.1	-0.906891	1.60387
RASGRF1	0.552541	1.60387
RBM26-AS1	-0.196397	1.60387
FAM214B	0.692737	1.60353
DCAF4	0.563318	1.60309
AVPI1	0.66213	1.60191
EP300	0.429242	1.60147
SMG9	0.379614	1.59962
MAP3K13	0.471807	1.59929
TRIM11	0.473984	1.59925
NBPF12	0.410809	1.59848
STAM	0.412982	1.5981
DDX58	0.692874	1.59738
AKAP8	-0.460353	1.59683
KLHL2	0.609697	1.59641
NT5C2	0.51116	1.59546
RASAL2	0.524698	1.59445
TRIM16	0.57201	1.59412
AL731569.1	-1	1.59378
LRRFIP1	0.344767	1.59349
EPS15L1	0.380093	1.59184
SMURF2	0.67113	1.59127
C19orf47	-0.442457	1.59125
PFDN1	0.430334	1.59067
LIPT2	-0.447459	1.58971
DPY19L1P1	-1	1.58971
PLEKHA8P1	0.808859	1.58822
KIF16B	0.401971	1.58807
DMRTA1	0.52544	1.588
PRPF38B	0.414127	1.58719
TMEM87A	0.391745	1.58655
LINC02802	-0.823122	1.58629
CALCOCO2	0.258808	1.58577
RCE1	0.526069	1.58444
RNF113A	-0.909147	1.58411
OTUB2	-0.396301	1.58318
PRUNE1	-0.475338	1.58315
CREB3L2	0.454818	1.58294
PARS2	-0.895303	1.5827
TMEM168	0.305831	1.58239
CBLB	0.812389	1.58157
PTPN21	0.667403	1.58026
BLOC1S2	0.628586	1.57873
AC018638.5	0.405819	1.57642
PCSK1	0.718229	1.57616
FCHSD2	0.493087	1.57527
HECTD3	-0.417575	1.57409
TRMT5	-0.60514	1.57353
SRGAP2C	0.466367	1.57212
SECISBP2	0.403842	1.57178
EMP1	0.47543	1.57158
RRP8	-0.708791	1.57115
GFPT2	0.536283	1.57
SBNO2	0.483195	1.56924
SLC36A4	-0.234234	1.56923
POLR1B	-0.571774	1.56788
ZNF692	-0.349305	1.56687
SEMA7A	0.467825	1.56649
STK3	0.341812	1.56627
CLASRP	0.376873	1.56619
HERC2P2	-0.73828	1.56617
MED6	0.362323	1.56527
RILP	0.715023	1.5642
STARD5	0.539366	1.5642
KCTD9	0.41023	1.56403
WDCP	-0.529054	1.56377
NHLRC3	0.357466	1.56362
SMIM8	0.621488	1.5624
SLC47A1	-1	1.5624
AC107027.3	-0.479168	1.562
ZNF646	0.465202	1.56108
DNAJC2	0.508738	1.56058
HMGN4	0.484804	1.56002
TSNAXIP1	-0.461904	1.55643
EEF1AKMT3	-0.451322	1.55531
NPR2	-0.541635	1.55485
NLRP1	0.581676	1.55347
POLR3C	0.471672	1.55295
ULK1	0.467921	1.55193
SSH2	0.489479	1.55175
CASTOR2	-0.628723	1.55167
PPP3R1	0.369594	1.55125
REST	0.572102	1.55112
NLK	0.553392	1.55072
OGFRL1	0.543043	1.55033
ING1	0.556766	1.55009
NGF	0.600177	1.54955
TMUB2	0.44234	1.54935
LINS1	-0.352039	1.54896
KNOP1	-0.523958	1.54853
SP2	0.334679	1.54847
ANXA1	0.38226	1.54818
ALG10B	-0.313003	1.548
ZNRF3	0.746068	1.54777
ZSCAN12	-0.333737	1.54764
MT-ND2	0.412344	1.54762
KDM5A	0.491425	1.54759
EPOP	-0.543985	1.5473
MEG3	0.484352	1.54722
TLCD5	0.533775	1.5455
SIX4	-0.838189	1.54547
ANKRD49	0.240433	1.54507
ZNF606	-0.608917	1.54493
ZNF134	0.378512	1.54286
RP2	0.456268	1.54204
SMG1P1	0.670499	1.54162
ATG2A	-0.422422	1.54138
AP001000.1	0.705817	1.54093
PGM5P2	0.487794	1.54044
C6orf62	0.480141	1.54026
VPS26A	0.425008	1.53873
PPL	-0.471306	1.53763
GSK3B	0.420039	1.53618
AC097662.1	-0.722466	1.5356
RRN3P3	0.5603	1.53556
ITGB1-DT	1	1.53318
FAS	0.290919	1.53189
PVR	0.504239	1.53175
ZNF786	-0.521285	1.53108
SLC7A8	0.674046	1.53081
ESF1	0.607931	1.53032
YTHDF3	0.417991	1.52964
POGK	0.458359	1.52961
TTC4	0.331206	1.52934
TRIM8	0.454356	1.52915
NOP2	-0.753767	1.52904
FDXACB1	-0.558967	1.52893
HLTF	-0.511487	1.52806
ARID1B	0.427377	1.52801
SIX2	-0.655665	1.52794
SH3PXD2B	0.487197	1.52638
GRB14	0.55486	1.5263
RRAS2	0.465255	1.52597
ABI1	0.517012	1.52595
GSPT2	-0.719353	1.52521
RPF1	0.29824	1.52352
SOX11	-0.84944	1.52349
ZEB1-AS1	0.722015	1.52285
NUPR1	0.694216	1.52213
CCDC126	0.954196	1.52193
ABCA1	0.821376	1.52132
TCEAL9	0.385218	1.52074
PTBP2	0.399465	1.52061
CCDC112	0.427862	1.52003
ZNF385A	0.329501	1.51867
UBQLN1	0.338739	1.5172
WDR5B	-0.955331	1.51703
TMEM86B	-0.980891	1.517
GGA3	-0.394953	1.51646
MYO9A	0.32588	1.51615
TAB1	-0.382505	1.51596
ATG5	0.396659	1.51484
KIF3C	0.517408	1.51457
ZNF292	-0.633618	1.51319
TMEM86A	1	1.51294
NRDE2	-0.389238	1.51291
POLR3B	-0.512937	1.51175
THG1L	0.530515	1.5097
TLE3	-0.403655	1.50928
KCTD13	0.604423	1.50893
AFF1	0.333701	1.50884
ARHGEF3	0.505413	1.5085
ZNF596	0.662305	1.50813
ZNF706	0.440083	1.50805
MFSD14A	0.625391	1.50766
EPG5	0.66982	1.50766
FZD4-DT	-0.841302	1.50688
AC016727.1	0.508147	1.50688
SRGAP2B	0.295718	1.50687
ARSE	0.410788	1.50543
UBP1	0.38087	1.50516
EXOSC6	0.589433	1.5043
IKZF5	0.489217	1.50357
AC012313.10	0.900464	1.50341
TRIM69	0.64549	1.49983
ZNF254	0.328358	1.4997
EGLN2	0.461948	1.49966
TMEM240	-0.523562	1.49945
AL157400.5	-0.830075	1.49945
SLC1A4	0.998693	1.49944
MYO1E	0.576236	1.49918
ZBTB9	-0.329515	1.4985
NHS	0.201365	1.49818
INTS6	0.418638	1.49648
LRP6	0.425974	1.49608
AKAP13	0.604937	1.49485
USP31	0.69773	1.49472
FBXL12	0.641952	1.49292
TESK2	0.648156	1.49235
DAAM1	0.584963	1.49193
MED17	0.446997	1.49167
NSMAF	0.32539	1.49122
ADAT3	0.595851	1.4904
DGKH	0.568861	1.48995
GHDC	-0.293196	1.48919
ZBTB48	0.291317	1.48874
COL11A2	0.720618	1.48808
ZBTB1	0.438582	1.48807
RPL21P28	0.959358	1.48804
AC122688.3	0.582303	1.48785
PCGF1	0.554748	1.48785
COG2	-0.477356	1.48599
AC091825.3	0.770518	1.48575
ZNF132	0.632695	1.48575
ROM1	0.349492	1.48458
TRAF3	0.488394	1.48458
TBK1	0.485427	1.48348
MKRN3	0.557482	1.48318
GRB10	0.414652	1.48286
FBXO6	0.289507	1.48279
UBE3A	0.418046	1.48255
PLCXD2	0.565378	1.48144
COG8	-0.539009	1.48125
AKAP17A	0.517909	1.48122
TMEM156	0.731393	1.48096
AKIRIN1	0.512427	1.48061
RNF125	0.712718	1.47845
AC113404.3	0.899071	1.4784
HSPB1	0.451497	1.47824
PTPN1	0.359485	1.47812
SCAPER	0.529109	1.47788
RBMS1	0.514029	1.47668
KMT5B	0.491409	1.47617
BMPR1B	0.710493	1.47617
CNN3	0.454364	1.47492
ZNF548	-0.556554	1.47458
ANKHD1	0.522517	1.47345
NAV2	0.486138	1.4733
GTF2B	0.377614	1.47282
NUDT3	-0.381961	1.47178
POLR3F	0.321399	1.47163
MRPL20-AS1	-0.648866	1.47138
ABL1	0.391427	1.47109
KLHL42	0.378398	1.47091
SETDB2	0.512951	1.46924
RNMT	0.557728	1.4691
EEF2KMT	-0.330948	1.46845
MBD4	0.501264	1.4679
AL645728.1	0.63743	1.46713
RABGEF1	0.450918	1.46665
FCHO2	0.248821	1.46636
ZNF785	-0.857335	1.46523
FBXO48	0.920566	1.4645
KLC1	0.36006	1.46431
DDX59	0.83307	1.46379
CCDC71	-0.676303	1.46348
TNFSF4	0.752072	1.46324
OLMALINC	0.876485	1.4629
PSAT1	0.924462	1.46266
IRF2BP1	-0.405963	1.46133
LIG4	-0.321928	1.45964
CIPC	-0.647165	1.45929
SREBF2	0.421221	1.45922
ZNF579	0.446309	1.45884
FAM107B	0.610772	1.4588
RNF168	0.386619	1.45835
ATN1	0.387545	1.4569
ADPRM	0.657894	1.45683
ELAC2	-0.424959	1.45673
UBB	0.363291	1.45666
FTH1P20	0.971431	1.45653
CASP2	-0.486758	1.45514
AC122718.1	0.584963	1.45506
TBC1D25	0.458607	1.4546
ZNF607	-0.788081	1.45312
MED18	-0.350558	1.4531
GTF2F2	0.411149	1.45304
COQ9	-0.284925	1.45166
AL158152.1	0.435215	1.45154
SYTL3	0.590016	1.45135
MID1IP1	0.565174	1.45125
ABHD17B	-0.725825	1.44911
PTS	0.460025	1.44855
NIPAL4	0.474803	1.44849
ADAMTS5	0.939337	1.4484
COX18	-0.457446	1.44827
ARL15	0.189686	1.44737
DCP1B	-0.671151	1.44647
GOLT1B	0.445238	1.44642
OXSR1	0.367875	1.44592
BBS12	-0.923379	1.44582
HIC2	0.549085	1.44578
AC093010.3	0.52738	1.44427
NOTCH2NLB	0.983126	1.44422
TPST1	0.330354	1.44366
KREMEN1	0.449803	1.44327
TRIM16L	0.488197	1.44301
SYT14	0.455313	1.4427
DNAH14	0.61891	1.44252
DHODH	-0.395692	1.44206
AEBP2	0.348126	1.44172
DMTF1	0.531537	1.44155
DPH6	0.300233	1.44104
FMN2	0.605909	1.44064
TBC1D13	-0.415919	1.44048
AL138976.2	1	1.44036
PAWR	0.510873	1.43995
SLC35E2A	-0.388642	1.43935
TTC23	0.267158	1.43862
GOT1	0.442069	1.43851
TMEM177	-0.875959	1.43832
TIRAP	-0.246264	1.43781
TMEM170A	0.584963	1.43747
FOXF2	0.682061	1.43747
CHMP4B	0.389999	1.43739
APBB3	0.487908	1.43702
MAP1B	0.524404	1.43628
RRN3	0.462919	1.4361
ZNF407	0.53682	1.43551
CDC42EP1	0.417563	1.43479
WASF2	0.328802	1.43466
AP1AR	0.513509	1.43332
MKKS	-0.335635	1.43267
ZNF496	0.351472	1.43264
AC016876.2	0.597989	1.43248
MUTYH	-0.262015	1.43221
ZNF700	0.377535	1.43066
ZCCHC7	0.436579	1.42876
WASF1	0.418841	1.42832
SPRED2	0.416188	1.4275
ARAP2	0.777428	1.42728
SOS2	0.477571	1.42708
RNF169	0.547602	1.42497
AC011893.1	0.5025	1.42493
AC092117.1	0.890376	1.42327
ZDBF2	0.539159	1.42268
THAP7	-0.364411	1.4226
SFT2D3	0.460696	1.42234
CAMTA2	0.565433	1.42109
SETD6	-0.317858	1.4208
AL162458.1	-0.832273	1.42035
ELMOD3	0.246696	1.41964
CLPX	-0.522537	1.41924
ARID1A	0.318974	1.41775
F2RL1	0.454115	1.41742
ABHD17C	-0.52336	1.41739
MALSU1	-0.390617	1.41612
KIAA1586	-0.752273	1.4157
MALAT1	0.802099	1.41569
THAP5	0.407798	1.41556
PHACTR4	0.68064	1.41533
FBXO21	-0.39745	1.41491
MARS	0.501088	1.41442
CDYL2	0.504837	1.41425
GOLGA6L9	0.520474	1.41342
LIFR	0.514085	1.41324
RLF	0.523308	1.41268
CCDC77	0.619338	1.41222
ARMCX5-GPRASP2	0.303781	1.41158
KLHL12	0.552812	1.41113
RBM4B	-0.2715	1.40981
ZNF500	-0.707742	1.40973
USP16	0.334583	1.40962
KLHL29	-0.340655	1.4092
TMEM144	-0.691878	1.40871
AC006213.1	-0.917538	1.40871
ZNRF2	0.692216	1.4087
UBASH3B	0.378937	1.40851
AC127496.7	0.550197	1.40816
RALGPS1	0.632268	1.40795
STXBP5	0.435905	1.40791
GREB1L	0.635428	1.40755
NDST2	-0.461426	1.40655
LHFPL6	0.374476	1.40558
ATP1B1	0.459758	1.40447
POLG2	-0.804276	1.40387
IRX3	0.699937	1.40376
ARF6	0.354239	1.40295
DYNLL1	0.349806	1.4025
PAOX	-0.801454	1.40167
TMEM209	0.300363	1.40119
CBLN3	0.51911	1.4007
RHOBTB2	-0.380822	1.40048
DHFRP6	0.963474	1.40035
BOLA1	-0.472371	1.39996
CSNK1G3	0.425117	1.39889
RAB7A	0.423785	1.39847
TUBGCP4	-0.417697	1.39842
TRIM68	-0.440373	1.39829
AL390728.4	0.296049	1.39781
CD58	0.329308	1.39777
CEP170B	0.411652	1.39709
NUP58	0.450978	1.39667
BICRAL	0.390659	1.39619
ERG28	0.478515	1.39543
CYB5R4	0.299919	1.39477
AC006001.3	0.38462	1.39462
TAOK3	0.424896	1.39345
PTCD2	-0.549178	1.393
ATXN1	0.498125	1.3928
LINC01128	0.425516	1.3926
ARHGAP21	0.319148	1.39109
INSYN2A	0.825971	1.39085
ZNF346	-0.592922	1.38983
ADRM1	0.430775	1.38885
IL15	0.697265	1.38874
ZNF202	0.555173	1.38766
ZNHIT2	-0.487707	1.38755
ETAA1	-0.462583	1.38732
APEX2	-0.412032	1.38726
ODR4	0.5346	1.38623
SWAP70	0.446585	1.38594
CRBN	0.404755	1.38561
RPS7P1	0.296718	1.38463
ALDH6A1	-0.373932	1.38368
HYAL3	0.515357	1.38346
ENSA	0.352111	1.38344
TMPPE	0.413462	1.38162
AC010198.2	0.49118	1.38138
IL4R	0.448976	1.38087
SELENOK	0.440764	1.38068
HSD17B12	0.441519	1.38036
RAB35	0.39862	1.3803
PLPP1	0.430751	1.37942
AC026362.1	-0.783376	1.3794
SLC26A4-AS1	-0.679911	1.37906
ZADH2	-0.421112	1.37889
ETV6	0.473609	1.37803
TBPL1	0.58717	1.37668
AGAP2	0.704544	1.37628
NUDT16	0.585874	1.37574
CSTB	0.439786	1.37525
DEPDC7	-0.59561	1.37484
SMTN	0.477421	1.37422
SDCBP2	0.527247	1.3735
HIST1H1C	0.420038	1.37329
LMTK3	0.407504	1.37166
RAP2B	0.423252	1.37028
PSME4	0.43959	1.36998
FAM76B	0.709099	1.36994
AL355001.2	0.936806	1.3699
WAC-AS1	0.440113	1.36967
SNAP47	-0.436554	1.3686
MTMR14	0.47137	1.3684
AC027644.3	0.630766	1.36836
SHOC2	0.454474	1.36776
ILRUN	0.29356	1.36717
SPATA2	0.486536	1.3658
MAPKAPK2	0.349313	1.36579
WDR70	0.374208	1.36555
ZBTB39	0.794314	1.3653
AC110079.1	0.714091	1.36528
PKD1P1	0.698619	1.36475
THAP9-AS1	0.497119	1.36403
AL591135.1	0.928447	1.36373
ATP6V1G1	0.511343	1.36303
SIRT3	-0.334118	1.36269
ZC3H10	-0.396143	1.36212
SNX16	0.654225	1.36153
LINC00920	-0.528694	1.36038
STAG1	0.311275	1.3595
HTATSF1P2	0.393664	1.35934
ZNF17	-0.534113	1.35887
USP51	0.752072	1.35838
FAM71F2	0.467126	1.35838
AC022137.3	-0.550197	1.35838
MYL5	0.518071	1.35798
WDR78	-0.387023	1.3576
CDK6	0.511752	1.35726
EXT1	0.522114	1.35692
SLC49A4	0.382076	1.35669
ZSCAN32	-0.49283	1.35598
ADAT2	-0.552972	1.35581
RAB21	0.449634	1.35482
TTC17	0.398155	1.35461
PEA15	0.483624	1.35436
CFAP300	0.682518	1.35427
ATP6V1A	0.327778	1.35418
SARS	0.417349	1.35398
SCAF4	0.338574	1.3533
GOLPH3	0.394497	1.35291
FBRSL1	0.531185	1.35245
C15orf41	0.272015	1.35172
ID2	-0.661198	1.35171
CRLF3	0.532451	1.35157
TPBG	0.631211	1.35155
N4BP2L2	0.372766	1.35154
SNRNP27	0.398194	1.35084
PPP2R5B	0.4485	1.35041
SYNGR3	0.963073	1.35039
KDSR	0.445563	1.35038
PDXP	-0.54278	1.35013
BRD8	-0.498361	1.34986
LACTB	0.297708	1.34927
YES1	0.36618	1.34923
ADPRHL2	-0.648753	1.34913
SLC11A2	0.47737	1.34869
FER	0.34372	1.34779
DLG4	0.321105	1.34718
BTN2A1	0.41597	1.34566
MLF1	0.541354	1.34455
C1orf52	0.359414	1.34428
GSKIP	0.396218	1.34399
AP002026.1	0.633872	1.3439
ROBO3	0.584963	1.3439
LINC01003	1	1.34383
ZNF625-ZNF20	0.541795	1.34343
FASTKD5	0.293215	1.34265
PLEKHM2	0.307135	1.34255
UBL4A	-0.40978	1.34244
ATP6V1H	0.4942	1.34194
LRRFIP2	0.41549	1.34091
THAP3	-0.756623	1.34016
MAPK8	0.476635	1.33964
SEMA4C	0.499835	1.33961
MSH6	-0.581685	1.33932
GNPDA1	0.545434	1.33924
CCNJL	-0.631021	1.33916
DOK1	-0.549377	1.33838
PLEKHA3	0.318263	1.33822
ITPKB	-0.250978	1.33753
NHSL1	0.744473	1.33735
AC090114.2	0.300081	1.33666
TMEM131L	0.350237	1.33653
SRF	0.419924	1.336
AL445685.3	-0.504513	1.33587
Z92544.2	0.557995	1.33493
FGFR1OP2	0.436786	1.33431
COL27A1	0.464817	1.33356
CNKSR3	0.882839	1.33229
SERTAD4	-0.67884	1.3321
TNPO1	0.388404	1.33197
TRIM61	0.621032	1.33177
WDR48	0.462136	1.33141
SPIRE1	0.489456	1.32882
SQOR	0.601108	1.32842
KYAT1	-0.210946	1.32815
TUSC2	-0.321044	1.32781
TM2D2	0.449817	1.3277
TTC30A	-0.782264	1.32764
TRIM41	0.40661	1.32735
BRD3	-0.367652	1.32649
CNOT3	0.233124	1.32632
STK17B	0.418534	1.32621
AL031058.1	0.807355	1.3262
ZNF200	-0.196477	1.3262
TXNIP	0.770281	1.32599
FSD1L	0.544321	1.32575
BICD1	0.722537	1.32453
AC008494.3	0.485427	1.32403
AC009404.1	-0.430634	1.32403
ZNF684	-0.556393	1.32403
ZBED2	-0.652077	1.32403
AC007216.3	1	1.32403
AC010501.2	1	1.32403
AC112484.5	1	1.32403
AC010809.2	0.788496	1.32403
RPAP1	-0.352218	1.32401
TJP2	0.896599	1.32382
IFI16	0.561311	1.32367
NPAT	0.285909	1.32307
TAB3	0.452309	1.32266
KCNQ5	0.436902	1.32111
PCNX4	0.316613	1.32109
AC009113.1	0.461331	1.32036
FGFRL1	0.311092	1.3198
RBM6	0.30535	1.31953
FLAD1	-0.235306	1.31909
HNRNPDL	0.338805	1.31848
MIER3	-0.21818	1.31762
WEE1	0.890544	1.31683
STAG2	0.359298	1.31639
ARID3B	0.687095	1.31621
ZNF573	-0.63005	1.31586
AC112220.2	0.709999	1.31524
ZNF322	-0.536163	1.31476
TRMU	-0.446647	1.31444
SHPK	-0.649901	1.31409
MTHFR	0.351799	1.31328
DGKE	0.477533	1.31327
TRAF6	0.464314	1.31303
ZNF691	-0.534545	1.31278
BCAR3	0.595068	1.31149
TWIST1	0.471306	1.31126
EIF2S2	0.41558	1.31118
IFFO2	0.589945	1.31076
YJEFN3	0.755581	1.31025
ZNF280C	0.395515	1.30945
EIF4E	0.325138	1.30852
SERAC1	-0.404867	1.3077
SLC20A1	0.435078	1.30764
MAP4K5	0.444071	1.30719
CCT6P3	0.684904	1.30702
RBM48	0.330693	1.30655
LRP12	0.495535	1.30621
NMNAT1	-0.497958	1.30589
ABCF1	0.331125	1.30483
BAIAP2	0.427711	1.30427
MOSPD1	0.401448	1.30409
KHNYN	0.45578	1.30371
USP11	0.340536	1.30281
ERCC5	-0.449557	1.30264
PLEKHG3	0.492064	1.30233
CCNK	0.296474	1.30174
FBXO38	0.368176	1.30149
FKBP1B	-0.160465	1.30148
KCNH1	0.73061	1.30104
PIAS4	-0.286849	1.30079
RNF24	0.515805	1.29984
LINC02204	-1.58496	1.29972
HMX2	-2.58496	1.29972
AC020910.5	2.11548	1.29972
RASSF7	-0.707686	1.29937
FZD1	-0.498226	1.29925
RELL2	-0.424885	1.29909
C2CD4A	2.90689	1.29888
AP001596.1	1.28951	1.29888
LYPD3	1.53605	1.2988
PPP4R3A	0.389325	1.29859
ZNF554	-1.16382	1.29801
PIM2	-0.532329	1.29746
DLG3	-0.133822	1.29713
CCDC137	-0.517504	1.297
TSPAN5	0.339812	1.29647
ZCCHC18	0.730393	1.29596
SYF2	0.37203	1.29581
ZSCAN21	0.478363	1.29544
AP000295.1	1.81268	1.29468
ZNF350	0.555389	1.29459
CCNI	0.306682	1.29407
FAM187A	-1.11247	1.29365
TINF2	0.288622	1.29168
URB2	-0.259884	1.29167
FAM126B	0.470891	1.29166
OTUD5	0.380753	1.29026
TTC12	-0.267696	1.28993
ABHD5	0.283454	1.28961
AC241585.2	1.65208	1.2893
AQP3	0.938599	1.28925
SSSCA1-AS1	-2.22239	1.28925
AC018628.1	1.36257	1.28925
FMN1	0.412548	1.28895
COMMD5	0.314068	1.28894
NCOA3	0.446129	1.28887
HIST1H2BC	0.86507	1.28882
ZNF75A	0.313719	1.28774
CFAP299	-0.485427	1.2873
MSANTD3-TMEFF1	0.7176	1.28687
IFIT5	-0.282434	1.28595
SLC35D1	0.353895	1.28588
ZNF92	0.481825	1.28577
AZI2	0.343162	1.28518
HCCS	0.474953	1.28503
AGER	-0.546282	1.28489
TRIM38	0.4456	1.28474
ZNF687-AS1	1.80735	1.28417
ENPP2	1.16993	1.28417
AL391684.1	-0.63743	1.28417
SUPT7L	0.281435	1.28361
FRAT1	-0.744441	1.28337
ZNF7	0.399575	1.28225
POM121C	0.340317	1.28213
C17orf67	0.881356	1.28208
DBI	0.362497	1.28052
ZBTB41	0.448692	1.28036
RIC1	0.506844	1.28012
ZNF230	-1.26303	1.27995
ZNF121	0.460613	1.27934
CHD7	-0.349378	1.27884
GAREM2	0.561427	1.27872
SLC35G2	0.617548	1.27871
RIOK1	0.501621	1.27871
KANSL1	0.482316	1.27858
ZNF837	-0.86821	1.27832
MRPL17	-0.389113	1.27786
DMWD	0.393096	1.27737
FMR1	0.393293	1.27728
DPYD	0.362342	1.27719
NUDT17	0.584963	1.27664
ZBTB18	-0.647698	1.27657
FAM169A	0.719163	1.27653
MCM9	-0.415037	1.27524
AC068870.2	1.87447	1.27469
ANKRD23	-1.04307	1.27427
EIF2S3	0.338177	1.27371
C12orf60	0.611435	1.27327
PMS2	-0.387293	1.27317
AL360270.2	2.45943	1.27296
LINC01534	1.08746	1.27296
CHI3L2	0.536053	1.27296
PPP1R12A	0.307213	1.27235
AC073365.1	0.250227	1.27208
ATP6V1C1	0.404625	1.27192
CYP51A1P2	1.51457	1.27165
ZNF852	-0.505235	1.27165
WARS2	0.467257	1.2709
BRD1	0.338502	1.27043
PPP1R9A	0.445311	1.27006
OTULIN	0.401814	1.26968
CAMSAP3	-0.823122	1.2691
EIF2AK2	-0.451088	1.26908
MDFIC	0.221764	1.269
AL136964.1	1	1.26887
SMYD4	-0.497187	1.26852
TOPORS	0.304994	1.2681
ZNF398	-0.29956	1.26786
IPO7	0.379012	1.2676
ATRIP	-0.516015	1.26732
ZNF319	0.48014	1.26671
KCTD14	-1.17306	1.2667
UBE2D4	0.31157	1.26641
GTF2IP20	0.774933	1.26598
AC126755.6	-2.58496	1.26541
SAP30BP	0.331816	1.26368
SPATS2	0.386945	1.26364
PDZD8	0.356642	1.26334
SDCCAG8	0.327743	1.26312
AC098614.3	0.720314	1.26268
ZNF260	-0.429777	1.26207
FTH1	0.473676	1.26168
MLLT10	0.321095	1.26165
AP002851.1	1.20645	1.26142
AC107398.3	-0.904422	1.26142
NCOA1	0.262728	1.26122
MYLIP	-0.560715	1.261
DNAJC27	0.738672	1.26016
PFDN2	0.331777	1.25972
ETFRF1	0.24184	1.25943
KCTD8	0.943416	1.25932
AL591846.1	2.80735	1.25932
AC010542.4	2	1.25932
SERBP1P1	2	1.25932
IGF2	1.32193	1.25932
THRB	0.73061	1.25932
ZNF93	-1.24576	1.25932
AC068205.2	-1.76553	1.25932
AC132872.2	-2	1.25932
AC078795.2	-2.80735	1.25932
AC024075.1	-0.893085	1.25932
MIR29B2CHG	2.24793	1.25932
AGAP11	2	1.25932
UTS2B	-0.514573	1.25932
PDZK1	-2	1.25932
DPY19L2P2	-0.624242	1.259
WDR43	0.368741	1.25899
TAF1A	0.452859	1.25866
AC245060.4	0.451284	1.25856
RREB1	0.421827	1.2585
PKN2	0.238592	1.25849
MAPRE1	0.302899	1.25823
GNG2	0.322901	1.258
CAPRIN2	0.372201	1.25785
MAP1S	0.437686	1.25752
HLA-E	0.378349	1.25663
AUNIP	-0.888579	1.25631
ALG13	0.368116	1.25626
LGALSL	0.436733	1.25538
AC025181.2	1.19265	1.25486
ZNF282	0.357535	1.25452
AL132780.4	-1.80735	1.2545
AC005041.5	3.45943	1.2545
YWHAZP2	3.45943	1.2545
UBXN2A	-0.226915	1.25441
HPS4	0.415037	1.25351
EIF3A	0.374492	1.25332
CHAMP1	-0.541917	1.25307
ZBED3-AS1	-0.632268	1.25237
PAPLN	2.70044	1.25237
VAMP2	0.524122	1.25228
IGF2BP2	0.398115	1.25206
IST1	0.335113	1.25204
AL662844.4	1.38702	1.25196
AL031009.1	2	1.25196
FBXO11	0.373833	1.25162
NSUN3	-0.279726	1.2514
LINC00909	0.473931	1.25136
RAB18	0.401435	1.25039
EEF2K	-0.517835	1.25035
CEP83	0.45846	1.25035
PPP2CA	0.317953	1.25009
DENND1B	0.488101	1.24975
DDX17	-0.269326	1.2496
PICK1	0.231816	1.24951
C12orf49	0.452471	1.2488
ZNF518A	0.592576	1.24841
AC092683.1	0.289985	1.24753
TCAF2	-0.781531	1.24742
AL365181.3	1.26679	1.2471
SLC12A7	1.44746	1.24609
AC130371.2	1.52356	1.24501
C5AR1	1.24101	1.24501
AC023157.3	0.912537	1.24501
RPGR	0.508147	1.2439
TDG	0.371495	1.24379
LNPEP	-0.335414	1.24323
KIAA1328	0.326703	1.2429
AL162274.3	1.73697	1.24234
C17orf113	1.73697	1.24234
AC009961.4	-0.906891	1.24234
HSD17B8	-1.73697	1.24234
ZNF681	-1.73697	1.24234
AC135048.4	1.82597	1.24234
DLG1-AS1	-0.552541	1.24234
AL034370.1	1.26303	1.24234
CLK2	-0.555485	1.24211
DPY19L4	-0.335948	1.24175
JHY	0.329705	1.24171
FLOT2	-0.266108	1.2415
XDH	0.496832	1.24102
ZNF8-ERVK3-1	1.20811	1.24099
DDX23	-0.365615	1.24083
GPATCH2L	0.46559	1.24081
SIRT7	0.559022	1.24025
NPIPB13	0.176878	1.23957
TUBB3	0.403459	1.23944
DDX5	0.384192	1.23907
AKAP6	0.431339	1.23894
FDPS	0.451254	1.23863
NSL1	-0.323665	1.23816
ZNF559-ZNF177	2.45943	1.23742
AP004609.3	1.44746	1.23737
ZNF385D	0.437005	1.23712
HMGB2	1.56319	1.23651
GRK4	0.405053	1.23586
RASGRP3	0.917538	1.23535
FBXW2	-0.352894	1.23389
SNRPB2	0.264222	1.23301
TNFAIP1	0.444731	1.23222
PDIK1L	-0.628031	1.23219
ZFAND2A	0.538179	1.23176
SUFU	-0.459827	1.2314
FXR1	0.343285	1.23104
ZMYM1	-0.489322	1.23058
DUSP11	0.502385	1.23002
CORO1C	0.336033	1.23002
EPSTI1	0.652077	1.23
AC006058.1	-1.1289	1.22978
PTCH2	0.450661	1.22929
RELL1	0.784662	1.22903
GTF2E2	0.307317	1.22865
PBX3	0.611007	1.22836
EBLN3P	0.480119	1.22815
CPTP	-0.433829	1.22778
RAB17	-1.16993	1.2266
C2orf74	-0.526436	1.22646
AC021092.1	-0.49581	1.22628
AC009303.4	0.974005	1.22615
AC015813.6	-0.45537	1.22607
KDM4D	-0.815575	1.226
PLA2G6	0.210499	1.2255
RBM38	0.434566	1.22484
MAP6D1	-0.590609	1.22482
HDHD5	-0.454698	1.22463
IRGQ	0.418928	1.22459
FERMT2	0.528332	1.22449
TRMT10B	0.277228	1.22444
PRPF40B	-0.182139	1.22423
VCAM1	1.91329	1.22389
ZNF865	-0.492668	1.22301
RCOR1	0.369234	1.22274
NBL1	0.355265	1.22246
ABCF3	-0.449986	1.2219
ZFYVE27	0.389591	1.22155
KCNK1	1.12553	1.2215
CCDC144A	-1.05889	1.2215
SPX	2.90689	1.2215
TUBB4B	-0.520095	1.22147
ZNF146	0.433976	1.22145
COX10-AS1	-0.38529	1.22099
IL1RL2	1.32193	1.22062
WDYHV1	0.142019	1.22062
AC069544.1	-1.32193	1.22062
TIMM29	-0.280335	1.22009
HSPE1	0.578918	1.21984
NXPH4	0.369606	1.21948
SCARF1	1	1.21946
PPM1J	0.713696	1.21946
LETM2	0.629285	1.21943
KMT2A	0.33262	1.21934
NUMB	0.333396	1.21911
MIER1	0.375875	1.21878
AC009237.14	1.34239	1.2183
GCC1	0.479933	1.21809
EIF2AK3-DT	0.557995	1.21806
AC044802.1	0.921997	1.21806
TPRA1	0.333189	1.21759
SMG1	0.407401	1.21742
VHL	0.406283	1.2174
TMEM135	0.278601	1.21677
TTC21B	0.369918	1.21673
ZNF816	-0.631613	1.21625
STIM2	0.227455	1.21614
HSPD1	0.528292	1.21563
TANC1	0.394355	1.21562
PRPF3	0.356015	1.21463
ZNF783	0.550672	1.21453
SMG1P2	0.761315	1.21433
VIM	0.35767	1.21401
KLF16	0.270031	1.21338
DEPP1	0.722993	1.21331
SRRD	0.369993	1.21256
PHF13	0.391609	1.21074
DDIT4	1.55758	1.21034
LRRC66	-2.12928	1.20975
BHLHE40-AS1	0.815575	1.20945
MIS12	0.57447	1.20929
DVL2	0.442247	1.20927
OXLD1	-0.467199	1.20904
GREM1	0.553463	1.20853
CIB2	-0.455195	1.20844
ZNF106	0.286312	1.2083
MFSD5	-0.464337	1.20789
RBSN	-0.252635	1.20782
PINLYP	0.82678	1.20747
NIF3L1	-0.293047	1.20718
HSPBAP1	0.975588	1.20653
TREX1	-0.930037	1.20613
AL049840.5	0.376334	1.20607
UCK1	-0.388721	1.20484
ZNF592	0.318754	1.20472
GABPB1	0.350926	1.20466
FBXL18	-0.501551	1.20442
LINC01583	1.08246	1.20406
PRR12	-0.518446	1.20396
SMAGP	0.309025	1.20369
RTF1	-0.413567	1.2034
ZNF471	0.420108	1.20327
ARMCX1	0.437483	1.20182
LRRTM2	1.84435	1.20169
VAPA	0.232428	1.20089
EDC3	0.312442	1.20076
DOT1L	0.42801	1.19939
PPFIA2	0.72316	1.19916
C18orf25	0.365053	1.19881
FAM120B	-0.341119	1.19849
SOD2-OT1	1.51457	1.19833
AC233699.1	1.20163	1.19833
TXNRD3	-0.301656	1.19819
NFYA	0.349894	1.19806
AL031587.5	0.356935	1.19786
RBM12B	0.405256	1.19755
ZUP1	0.133045	1.19726
CNBP	0.324468	1.19714
ARHGAP10	0.408174	1.19696
RAB9B	-0.463947	1.19672
LINC01561	-0.632268	1.19672
TEAD4	0.371713	1.19668
PGP	-0.358914	1.19655
ZNF429	0.309544	1.19646
PHF21A	0.366128	1.19596
NUDT19	0.388465	1.1952
TIMM10B	0.390001	1.19502
ZNF517	-0.685891	1.19485
RPS10-NUDT3	0.586258	1.19421
TFDP2	-0.347836	1.19381
GCLM	0.4663	1.19364
LIMD2	0.284553	1.19348
FZD4	-0.394279	1.19333
MMAB	0.397041	1.19258
IZUMO4	0.459432	1.19186
CWC22	0.41924	1.1911
ARRDC2	0.567607	1.19093
STAM2	0.358251	1.1906
DOP1A	-0.365317	1.19058
BCL3	0.395055	1.1904
ADNP	0.338143	1.1899
LENG1	0.320839	1.18979
AC012640.2	0.584963	1.18925
CABCOCO1	-0.736966	1.18925
BEST4	0.691878	1.18925
CLDND2	-1.58496	1.18925
KCNQ3	-1.87447	1.18925
AC009093.4	3.16993	1.18925
AC068633.1	3.16993	1.18925
ZNF474	3.16993	1.18925
LINC00672	-1.09954	1.18925
TNFAIP6	0.530515	1.18925
TFPI2	0.638791	1.18908
ZFX	0.28271	1.18903
DDX47	0.327374	1.18794
RAB39B	1.42146	1.18782
CDC40	-0.250854	1.18766
CIR1	0.305354	1.18761
CORO7	0.345558	1.18727
AC135050.6	0.626185	1.1872
RAB5A	0.402014	1.18629
TTLL7	0.253033	1.18627
TLR4	-0.515492	1.1862
TCP1	0.386054	1.1857
SAMD9L	0.376024	1.1855
NBR2	0.499306	1.18514
ARMC5	0.429105	1.18471
NOC3L	0.354241	1.18466
INIP	0.246785	1.18416
ZNF395	-0.464106	1.18396
MAPK7	-0.489823	1.18355
TRERF1	0.490471	1.18248
PCGF3	0.445661	1.18237
LHX4	0.95109	1.18215
SLC30A7	0.415167	1.18133
SHC4	1.12676	1.18113
SMPDL3A	-0.309991	1.18111
METTL4	0.167236	1.18064
MPP2	-0.373178	1.18057
HERC2P3	-0.656046	1.17964
HGH1	-0.429455	1.17964
NR3C2	0.525091	1.1795
ZNF667	0.489471	1.17916
MOB1B	0.445284	1.17886
BCO2	1.67807	1.17875
HEATR3	-0.443919	1.17847
AC008687.2	2.73697	1.17846
PITRM1-AS1	1.20645	1.17846
KCNC4	0.785261	1.17846
FJX1	0.669083	1.17842
FRMPD3	0.89812	1.17806
TARS	0.338495	1.17776
PLEKHB2	0.266518	1.17745
TVP23C	0.509411	1.17715
GGNBP2	0.294653	1.17681
AGO3	0.280621	1.17664
AC011462.5	-0.450107	1.17621
AL031274.1	1.16993	1.17544
UNC79	1.16993	1.17544
AL139246.5	-1.16993	1.17544
KCNQ4	-1.16993	1.17544
LINC02701	-1.16993	1.17544
AC026202.2	2.58496	1.17544
AC068338.3	2.58496	1.17544
AC097381.1	2.58496	1.17544
AC099792.1	2.58496	1.17544
FAM180A	2.58496	1.17544
KCNF1	2.58496	1.17544
KPNA2P1	2.58496	1.17544
LINC01315	2.58496	1.17544
MMP1	2.58496	1.17544
TCP1P1	2.58496	1.17544
ZNRF3-AS1	2.58496	1.17544
PDE4C	2.11548	1.17544
NCK1-DT	-0.278301	1.17544
CFAP99	-1.58496	1.17544
AC005790.1	-2.58496	1.17544
AC008429.2	-2.58496	1.17544
AC010435.1	-2.58496	1.17544
AC015921.1	-2.58496	1.17544
AC016745.2	-2.58496	1.17544
AC022126.1	-2.58496	1.17544
AC024884.2	-2.58496	1.17544
ART5	-2.58496	1.17544
EPB41L4A	-2.58496	1.17544
LINC02324	-2.58496	1.17544
PTGS1	-2.58496	1.17544
SUCNR1	-2.58496	1.17544
AC009118.2	1.41504	1.17544
AC012443.2	1.41504	1.17544
WDR45	0.303803	1.17535
RMC1	0.393102	1.17527
MARCH4	0.407418	1.17452
CNNM4	0.544244	1.17428
ABT1	-0.417276	1.17396
SLC25A51	0.405691	1.17382
TAF13	0.472068	1.17373
CBFB	0.397211	1.17343
PAG1	0.716522	1.17311
ZNF860	-0.456858	1.17304
POLR2J4	-0.193772	1.17298
REV3L	0.270481	1.1723
CEP170	0.410918	1.17208
NOP16	0.272037	1.17179
[truncated: 16,457 more rows]

## Sheet: Significantly Up
gene_name	Log2FC	log10 p-value
TNFAIP3	5.88769	7.61224
GADD45A	3.59243	7.04712
AC144652.1	3.45801	6.71767
NOCT	4.01224	6.16278
FOSB	7.31865	6.09123
JUNB	3.88633	5.60985
WTAP	2.21245	5.60324
SOD2	4.62483	5.54009
TGIF1	2.33421	5.53416
ELMSAN1	2.66649	5.52605
RND1	4.2854	5.49677
HSPA1A	4.36805	5.48439
TMEM88	3.94251	5.46683
DLX2	2.80735	5.32594
IL1A	4.73039	5.28092
PPP1R15B	1.72197	5.19326
PPP1R15A	3.73427	5.15469
TMEM217	3.2738	5.12162
BTG2	3.18508	5.00415
IL1B	4.45695	4.93319
ZBTB21	2.7347	4.91421
DUSP5	3.48127	4.81452
KDM6B	3.45744	4.8074
BBC3	2.70895	4.78546
JUND	2.06619	4.77077
BHLHE40	3.46256	4.7652
KLF7	2.39772	4.72936
RIPK2	2.43486	4.68536
REL	4.06588	4.60549
IL6	4.65301	4.58822
CXCL1	8.41555	4.57381
MAP3K8	3.66525	4.56827
PTX3	2.24369	4.55639
HSPA1B	4.55101	4.55137
NUAK2	3.6741	4.5413
DNAJB1	2.69161	4.51675
LATS2	2.25041	4.50301
SLC16A6	3.14708	4.49527
SERTAD2	2.40411	4.47249
GPCPD1	1.9604	4.45697
PMAIP1	2.88372	4.45021
ATF3	9.34725	4.43314
MAFF	4.74917	4.39976
KLF6	4.25163	4.39743
ZC3H12C	2.58218	4.38955
DNAJB4	2.19382	4.38051
JMJD1C	2.55594	4.35825
AC099778.1	1.5502	4.35315
LIF	3.78573	4.3364
SLC25A25	2.04214	4.33432
TSC22D2	1.68236	4.32184
NKX3-1	3.08082	4.32017
HIST2H2BE	1.19931	4.31821
AC083837.1	1.31316	4.30083
ETS1	2.85052	4.29266
HSPA6	7.95303	4.28887
USP53	2.50193	4.28247
KLF10	2.20919	4.27692
ABL2	3.44265	4.25827
ZNF441	1.88124	4.25581
ZFP36L1	2.65165	4.24538
SRFBP1	1.6976	4.24231
MIR155HG	2.1375	4.22348
PIM3	3.28944	4.22009
IER3	4.01394	4.21858
CYP1B1	1.48927	4.204
HMGCS1	3.35357	4.20285
SQSTM1	1.8786	4.20149
HIVEP2	2.74545	4.19312
LRIF1	2.4366	4.18866
STK40	1.96792	4.17921
ZNF267	2.21444	4.15425
TSLP	2.13186	4.15415
AC012181.2	4.16993	4.1536
DUSP10	3.13984	4.14946
CLEC2D	2.69459	4.14808
CCNL1	1.80094	4.12627
AC020916.1	1.72591	4.12557
TRAF1	2.94403	4.10218
SAT1	2.16591	4.10014
DUSP8	3.65469	4.09911
KBTBD8	3.05507	4.09868
PIM1	3.60265	4.09805
RCAN1	2.03637	4.09721
CXCL8	7.46235	4.09593
NR4A3	4.56723	4.07217
EGR3	4.66262	4.07112
ZNF217	1.16357	4.0686
DUSP16	2.20397	4.0303
BCL6	2.55871	4.02849
ZNF670	2.14684	4.02029
CDKN1A	1.55735	4.01009
ZC3H12A	3.7749	3.98564
NFE2L2	1.87919	3.97781
SAV1	1.93698	3.97446
CEBPB	2.57397	3.97425
VPS37B	1.15106	3.97381
TIFA	2.1396	3.95957
MCL1	1.52825	3.93765
F3	1.64162	3.93656
TNFAIP8	2.82218	3.93246
KLF9	1.54363	3.93175
PPP1R10	1.08679	3.92704
HSPB8	3.01045	3.91779
PER1	3.15552	3.90891
SLC30A1	2.09283	3.90155
GEM	4.84112	3.89067
IRAK2	3.68211	3.88997
UBC	1.73811	3.88897
EFNA1	5.76981	3.87912
RBM7	1.28738	3.87007
IRF2BP2	1.43748	3.86932
MAFG	1.75733	3.85648
CLK1	1.10616	3.85015
LINC00346	3.89077	3.84936
PTGER4	2.88474	3.8444
MAP2K3	1.70319	3.84247
NAMPT	1.47215	3.83896
SLC3A2	2.0268	3.83276
DCUN1D3	1.79849	3.83192
MSC	2.84329	3.83171
B3GNT5	2.44322	3.83086
SLC25A33	1.62097	3.82855
FGF5	1.80019	3.82609
AC092718.3	1.32833	3.82432
SMAD7	1.66549	3.80949
NFKB1	3.35736	3.79235
ZBTB10	3.24505	3.78681
TIPARP	1.24279	3.78076
CEBPD	3.54749	3.76218
FOSL2	2.59796	3.75432
SOWAHC	1.5687	3.75397
TNFRSF18	4.32193	3.75068
CSRNP1	2.10933	3.73867
FOXC2	1.15451	3.7317
BACH1	2.22343	3.72336
ICAM1	3.50893	3.72076
AMOTL2	1.73333	3.69982
INSIG1	4.18877	3.69941
PTP4A1	1.62726	3.6974
SNAI2	2.31149	3.69726
BCL10	1.66429	3.69242
FP565260.3	3.82782	3.68716
TBX2	2.57393	3.67635
TRIM47	1.8637	3.66148
NCR3LG1	1.57269	3.65842
LDLR	2.00279	3.65581
DNAJB5	1.3875	3.64902
KDM7A-DT	3.49476	3.64591
CDC42EP2	1.84728	3.64505
ZBTB34	1.56464	3.64441
DUSP2	2.34314	3.64376
RUNX1	1.80228	3.63953
ELOVL5	1.37423	3.63379
PPP3CC	1.42308	3.63046
ITPRIP	2.61189	3.62704
FOXC1	2.47825	3.62161
ARL5B	1.92159	3.62144
RNF144B	2.1375	3.61102
UAP1	1.30076	3.61093
LAMC2	1.10771	3.61053
PTHLH	3.31773	3.59391
FEM1B	1.71885	3.59163
NFKBIA	3.25482	3.5914
ZNF697	2.93187	3.58539
FOS	5.26527	3.58324
ITPKC	1.68706	3.58159
DRAM1	1.96808	3.58155
FCRLA	3.12928	3.5808
ZP3	2.16993	3.57593
C3orf52	2.98383	3.57377
AL512274.1	3.16993	3.57179
RNF19B	2.06205	3.56968
OSER1	1.58988	3.56821
CXCL2	8.45591	3.56272
SLC19A2	2.33073	3.55269
PLK3	1.78841	3.55166
BTG1	1.11205	3.54995
ZNF699	1.1677	3.54993
SIK1B	1.85433	3.5493
BAG3	1.46825	3.54791
SIRT1	1.12902	3.5456
MVD	1.15735	3.53959
ZSWIM4	2.04734	3.53787
MXD1	2.36027	3.53508
HMGA2	1.28427	3.53076
TICAM1	1.32099	3.51838
RND3	3.59299	3.5141
TBC1D10A	1.63879	3.5134
ERRFI1	1.52529	3.51327
NAB2	1.82686	3.50612
CD274	2.20924	3.49674
MBNL2	1.07098	3.49672
CXCL3	9.14744	3.49307
BCOR	1.28432	3.49217
CPEB4	1.09484	3.4898
IRF1	3.62476	3.48633
LINC02104	1.54432	3.48622
SLC7A5	1.72766	3.48093
ADAMTS1	3.51047	3.47798
GRAMD2B	1.22678	3.47785
STARD13	1.62929	3.47751
HSPH1	2.18398	3.47491
FOXO3	1.68509	3.47353
NFKBIE	2.18161	3.47302
SDC4	1.34391	3.4676
CYP51A1	1.31886	3.45857
TSC22D3	1.29782	3.45524
NEAT1	2.5879	3.44756
FLVCR1	1.48151	3.44359
OSGIN1	1.95238	3.41583
HMGCR	2.47454	3.41308
MSMO1	1.79853	3.40706
SIK1	1.94473	3.39737
NEDD4L	2.0533	3.39045
ZSWIM6	1.59948	3.3795
IER2	1.68208	3.3713
PIWIL2	2.80735	3.36948
GORAB	1.24486	3.36756
BAMBI	1.86049	3.36193
GZF1	1.53312	3.36038
CCNG2	1.54256	3.35735
KLF7-IT1	4	3.34946
IDI1	1.96517	3.3491
MEX3B	1.99189	3.34324
CHMP1B	1.30957	3.33474
EVA1A	1.44287	3.33429
CLCF1	1.86981	3.3182
JDP2	1.82491	3.3161
STX11	2.22342	3.30906
FOXP2	1.01505	3.30389
AC009549.1	1.82005	3.30367
RETREG1	2.47789	3.29837
LENG9	1.14608	3.29377
KBTBD2	1.10054	3.28869
TLNRD1	1.56184	3.28781
NIPAL1	1.11057	3.28766
FEM1C	1.2115	3.28175
INHBA	3.08111	3.28156
PNRC2	1.15824	3.27416
SNAI1	2.13036	3.27293
CTTNBP2NL	1.38143	3.27089
NR4A1	2.82061	3.26933
EGR2	6.01781	3.26326
EGR4	8.79116	3.25876
AL078459.1	2.58496	3.25026
NAB1	1.54449	3.2487
IFIH1	1.15381	3.24415
CPEB2	2.10646	3.2402
ATP2B1	1.29296	3.23992
TNFRSF10B	1.34007	3.23647
HSD17B7P2	2.32193	3.23421
EPPK1	1.45943	3.23328
IL21R	1.48543	3.23153
TEX10	1.06732	3.23104
DYRK3	2.04433	3.2274
LMO4	1.23403	3.226
PLEKHF2	1.15581	3.2206
AOC2	1.4975	3.21684
PALM2-AKAP2	1.55928	3.21598
FGD4	1.22572	3.21495
NINJ1	1.04167	3.20613
TP53BP2	1.35577	3.20036
IFNAR2	1.64584	3.19977
IL6R	2.66658	3.1867
UGDH	1.42293	3.18352
JUN	2.64079	3.17818
SERPINB2	2.67153	3.17484
NFIL3	3.4976	3.16605
PPP4R1L	1.36156	3.16435
NABP1	1.99608	3.16375
XBP1	1.35024	3.16209
PANK3	1.09642	3.15867
ELL	1.51652	3.15692
AMN	3.22239	3.15516
HSD17B7	1.43854	3.14765
EIF1B	1.12537	3.14552
GADD45B	1.70851	3.14335
HIVEP1	2.33099	3.14017
KLHL15	1.2848	3.13736
RYBP	1.19707	3.13124
MAPK6	1.40321	3.13026
CCL2	1.97307	3.12995
KLF5	2.39843	3.12796
DUSP1	2.63563	3.12452
FILIP1L	2.30171	3.12435
NFKBID	1.51245	3.12199
KIAA1217	1.49397	3.12062
USP54	1.23261	3.11336
AC026356.1	1.51457	3.10907
C21orf91	1.20729	3.10808
MNT	1.54436	3.10659
AC115284.4	3.41504	3.10511
CCDC117	1.24161	3.10479
USP2	1.44127	3.10471
ANKRD12	1.28783	3.10057
CRYAB	2.8635	3.09631
TP53INP2	1.34313	3.09571
LINC00265	1.38355	3.09512
E2F7	3.07481	3.0923
NPC1	2.13264	3.09218
ADNP2	1.03651	3.08869
RNF139	1.10444	3.08556
MSANTD3	1.56216	3.08106
METRNL	1.64249	3.08083
BIRC3	3.28612	3.08073
PNPLA8	1.34447	3.07648
KLF11	2.23447	3.07488
CREB5	3.36483	3.07472
ARID5B	2.07985	3.07232
FAM53C	1.08729	3.06679
AL158050.1	1.90987	3.06007
NEDD9	3.71055	3.05774
NFKB2	1.81132	3.05644
HRK	5.72792	3.05235
CITED4	2.04606	3.05127
HLX	3.99408	3.04503
TNFSF9	2.9462	3.04125
AL135905.2	1.05032	3.03779
ELOVL7	5.45438	3.03385
LURAP1L	3.66819	3.03333
STX3	1.74284	3.02824
SREBF2-AS1	3.11042	3.02823
DUSP14	1.15305	3.02665
ABTB2	1.60578	3.02644
ZEB2	1.42381	3.02306
TAF4B	1.81963	3.0227
SHF	1.43063	3.02119
AC079949.2	5.75489	3.01975
MSX1	2.02495	3.01865
TUBE1	1.18279	3.01784
SPSB1	1.39604	3.01526
ELF4	1.37547	3.01496
KIF1B	1.42572	3.00991
CREBRF	1.95021	3.0041
MAFK	1.47849	3.0037
ERBIN	1.41115	3.00131
KANSL1L	1.03989	2.99993
NOTCH2NLC	1.25535	2.99714
ATF4	1.20065	2.99377
TUFT1	1.60142	2.99061
USP36	1.48183	2.98949
NCOA7	1.19836	2.97798
CHIC2	1.64395	2.97717
ZCCHC2	1.46116	2.97685
DKK1	1.0447	2.97559
CEBPG	1.69442	2.97248
AC145098.2	1.80263	2.95957
ANKRD33B	4.08006	2.95333
KLHL24	1.01034	2.95284
MIDN	1.07576	2.95246
RAB32	1.32009	2.95063
BIRC2	1.19172	2.949
ARRDC3	1.26221	2.94811
MMP25	2.85244	2.94747
AC135977.1	2.36798	2.94695
CDC42SE1	1.10957	2.93897
RHOB	1.3299	2.93475
NAMPTP1	1.635	2.93451
ARID5A	2.82699	2.93229
KLHL21	2.47147	2.92429
MICB	2.20703	2.92078
AC009831.1	1.50696	2.91754
LRRC8C-DT	2.04836	2.91672
FLCN	1.41282	2.91067
ZNF597	1.51497	2.90146
ZFP69B	1.15974	2.90091
SIAH1	1.07267	2.8989
TRIB1	3.05561	2.8983
LITAF	1.06396	2.89802
EGR1	3.14905	2.89359
UBALD2	1.28153	2.89194
GABARAPL1	1.62986	2.89176
JMJD6	1.42878	2.89093
ADM2	3.32193	2.88841
CSGALNACT2	1.33615	2.88747
USP12	1.455	2.88652
TBC1D22B	1.0398	2.88557
SRXN1	1.34983	2.87866
PADI1	1.03747	2.87815
SLC39A14	1.16951	2.87384
NCF2	1.59192	2.8724
CDV3	1.01255	2.86399
TUBB2A	1.4665	2.86258
MYCT1	2.58496	2.85857
SQLE	1.21764	2.85627
AC080038.1	2.20645	2.85494
FOXN2	1.3359	2.85279
MT-RNR1	1.26812	2.8482
OTUD1	2.336	2.84452
GDF15	3.04439	2.84075
CLDN1	3.47003	2.83802
CSF2	6.51537	2.83785
MFSD2A	1.50513	2.83401
GBP2	1.41914	2.8323
SMIM13	1.04531	2.82341
NFKBIZ	3.24256	2.81536
SERPINB8	1.22538	2.8137
TNFAIP2	2.51344	2.81339
SIX5	1.45986	2.81328
ATXN7	1.96191	2.81084
DUSP6	1.94712	2.80849
PLEKHM1	1.11126	2.80849
PAQR9	2.7761	2.80762
ZNF460	1.89077	2.7953
LPIN1	1.31666	2.79051
AL118506.1	1.70431	2.78834
HRH1	1.66113	2.78831
AC008966.3	2.58496	2.78481
HKDC1	2.18903	2.78255
AMPD3	1.73796	2.78198
FRMD6	1.49259	2.77464
BTG3-AS1	2.88264	2.77171
KCTD11	1.65665	2.76857
EIF2AK3	1.34903	2.76799
TET3	1.60307	2.76732
RICTOR	1.27516	2.76664
ZNF442	3.82443	2.76417
SEC14L1P1	1.0902	2.76356
HBEGF	4.16222	2.76051
CD83	3.64243	2.7605
KDM6A	1.21859	2.75986
RNF19A	1.19031	2.75699
MELTF	2	2.75623
HECW2	1.12549	2.75374
SERTAD1	1.19917	2.75148
TFAP2A	1.01143	2.74306
TLR2	2.09622	2.73907
AC027290.2	1.80735	2.73719
AP5Z1	1.32289	2.73617
RASAL2-AS1	2.20436	2.72723
SC5D	1.28182	2.72374
FGF2	1.9683	2.72174
AL117339.5	1.60618	2.7216
SPHK1	1.17838	2.71897
STAT5A	3.04439	2.71637
ZIC5	3.70044	2.71327
AC245297.1	1.06008	2.71246
UTP25	1.09002	2.70716
AC124798.1	1.57817	2.70614
AL161421.1	2.30039	2.7041
FOSL1	2.13968	2.69991
LIPG	2.3497	2.69892
ZFP36	3.00634	2.69846
SLC7A1	1.03252	2.69821
AL139393.3	2.14775	2.69512
LINC02605	4.18322	2.69181
UBTD2	1.22155	2.68898
DMRT3	1.17585	2.68874
FNIP1	1.5085	2.68868
STARD4	1.05755	2.68656
ZNF773	1.21213	2.68575
ZNF627	1.01362	2.68186
PPTC7	1.02732	2.68112
AGO2	1.14804	2.6806
ZBTB43	1.46518	2.67583
RGS9BP	1.80735	2.67558
RASD1	3.45943	2.67558
TUBB2BP1	3.45943	2.67558
ANKRD1	2.38953	2.66824
GCH1	2.98514	2.66732
MAP1LC3B2	1.12409	2.66638
SPRY2	3.01446	2.66536
PELI2	1.42469	2.66277
TRIB3	2.01029	2.66259
CSF1	1.48385	2.6619
BMP2	1.19856	2.66172
AL022328.1	2.16993	2.65913
RPLP0P2	1.57289	2.6551
ETV3	1.23673	2.65488
RBMXL1	1.27963	2.65438
IL1R1	1.18209	2.65045
NDUFV2-AS1	1.36257	2.64911
GCNT4	3.58496	2.64911
WFIKKN1	1.09115	2.64719
ODC1	1.07564	2.64526
AC010210.1	2.32193	2.64237
FOXP1	1.13745	2.64166
ESM1	2.91486	2.6405
ARL13B	1.13028	2.63765
CCDC121	1.12262	2.63523
PHLDA2	1.11076	2.63505
MAP1LC3B	1.22773	2.63348
ICAM5	1.72247	2.63169
ITPRIPL2	1.00373	2.63009
CFLAR	1.22591	2.62907
IER5	1.37966	2.62401
SUSD6	1.84061	2.62367
MVK	1.09524	2.62297
SAMD4A	2.57621	2.62147
FOXL1	1.27235	2.60522
RSRP1	1.07264	2.59944
NFATC2	1.67049	2.59812
LONRF1	1.50394	2.59425
PPP1R3B	1.30153	2.59302
COX19	1.00622	2.5921
PTGS2	4.28429	2.59197
KDM7A	2.32895	2.58858
SNX9	1.12303	2.587
ARRDC4	1.81055	2.58668
RNF44	1.27191	2.58389
HDX	1.30908	2.58157
ZXDA	1.1592	2.57961
FAM83G	1.26955	2.569
PXDC1	1.62159	2.56635
KLF4	3.03868	2.56577
MEG9	1.32723	2.56446
EPC2	1.04865	2.56194
C11orf96	9.93369	2.55899
IRS2	1.03472	2.55354
ZNF433	2.10579	2.55224
C9orf72	1.23563	2.54276
RAB33B	1.05307	2.54265
AL353625.1	1.21444	2.54264
FAM102A	1.10795	2.53921
ADAMTS8	2.90689	2.5391
ERFL	1.65208	2.53791
SLC16A13	1.14975	2.53731
ZNF44	1.91146	2.53685
KLF13	1.01656	2.53663
ZBTB20	1.04045	2.53524
KLF3	1.51213	2.53522
SYT7	1.21573	2.5348
ETS2	2.79243	2.53469
AC132872.3	2.10434	2.5321
TNFRSF9	3.06736	2.52499
RELB	1.62317	2.5226
ZNF281	1.11155	2.51886
ANKLE2	1.0391	2.51882
ATP6V1FNB	2.782	2.51641
SPRY4	1.43587	2.51621
CHORDC1	1.36992	2.51578
UBE2B	1.05553	2.51286
HES4	1.62513	2.50615
SGK1	1.36699	2.50525
AC016245.2	4.24793	2.50507
AC099552.1	3.32193	2.50507
AC004832.5	2.45943	2.50507
CD72	2.45943	2.50507
ALOXE3	1.48543	2.50507
C2orf27A	1.18018	2.50129
CHST3	1.07493	2.49818
CDC37L1	1.0305	2.49801
TMEM225B	1.38702	2.49692
CYTH4	2.60881	2.4954
ARL14	2.08746	2.49036
SLC41A2	1.47717	2.48913
CCL3	6.2384	2.48794
IL32	1.45645	2.48251
LACC1	1.74562	2.48121
IRX5	1.53051	2.48025
CCSER2	1.069	2.46937
HERPUD1	1.56835	2.46623
HIPK3	1.16497	2.4637
ACAT2	1.05402	2.45924
AC097359.2	1.02061	2.45868
PDGFB	1.58211	2.45494
DLGAP1-AS2	1.94877	2.45427
YOD1	1.38317	2.45214
AC135178.3	3.58496	2.43768
DNAJB9	1.49987	2.43631
ISYNA1	2.17754	2.43272
KRTAP2-3	1.46158	2.43125
ZNF516	1.21085	2.43041
N4BP3	6.26679	2.42406
CNOT6LP1	2.66297	2.42343
C6orf132	1.06568	2.42178
CHAC1	4.65162	2.42169
KANK1	1.50596	2.41648
AC005839.1	1.34792	2.41364
LINC02742	1.23704	2.41309
SLC7A11	1.67675	2.41156
PER2	1.05394	2.40945
CLDN14	5.41504	2.40728
VXN	1.89566	2.40515
AC107959.1	1.95936	2.40153
HMOX1	3.30021	2.39655
AC010186.3	1.45138	2.39014
ZNF295-AS1	3.73697	2.38954
ZBTB5	1.11417	2.38642
TBILA	1.19068	2.38417
NEXN-AS1	2.4746	2.37815
NFKBIB	1.04309	2.37644
SLC2A3	1.21865	2.3716
AL162377.1	2.68072	2.3685
NGFR	4.72451	2.36681
INO80D	1.34721	2.36446
CTH	1.7323	2.36405
IL11	1.83229	2.36177
HNRNPKP2	2.08746	2.36083
AC011497.2	1.44827	2.36034
SH3TC1	1.06825	2.35898
NR4A2	2.48735	2.3574
TBX20	1.96347	2.35707
BTN2A2	1.00125	2.35617
DEDD2	1.33599	2.35597
EHD1	1.13798	2.35152
NMRAL2P	2.27302	2.34338
C15orf39	1.05227	2.33163
TENM3-AS1	1.22393	2.33134
SLC2A6	1.96884	2.33128
SLC28A3	1.65368	2.33075
TLE1	1.07258	2.32822
FUT4	1.05184	2.31996
INHBE	2.32193	2.31761
NBPF19	1.41102	2.305
YPEL2	1.42972	2.30079
MFHAS1	1.20158	2.29871
HMBOX1	1.02451	2.29388
KRT34	3.06413	2.29132
HDAC9	1.34425	2.28953
CCN2	1.29829	2.28906
AP000941.1	2.77259	2.28309
ZNF140	1.0871	2.28184
VGF	1.85415	2.27785
FAM241A	1.46949	2.27421
ZNF274	1.36321	2.27375
AC138028.6	1.8365	2.27041
NAV3	1.09376	2.2693
AC010733.2	4.63662	2.2648
AL355304.1	3.25873	2.25399
AC004854.2	1.33298	2.25215
GPR68	1.50889	2.24724
AC022415.1	1.66626	2.2423
TMEM119	4.16993	2.23773
AC012181.1	1.53051	2.23773
AL590666.2	2.32193	2.22881
LAMA3	2.5119	2.22402
RASEF	2.72403	2.22316
IL4I1	1.32193	2.21655
BTBD19	1.02145	2.21565
DAB2	1.0156	2.21257
ZCCHC14	1.15626	2.19567
P2RY11	1.28085	2.19122
AC069185.1	2.55459	2.18946
BEST3	1.64386	2.18755
SERPINA1	1.02857	2.18601
CEP295NL	2	2.18486
LTA	2	2.18486
TEX19	2	2.18486
AC016999.1	3.37504	2.18239
SESN2	3.1051	2.18238
TIAM2	1.10579	2.18009
GAS2L3	2.09317	2.17775
IQCN	1.10852	2.1703
RASGEF1B	4.04439	2.15488
AL606834.1	4.45943	2.15394
AC132872.4	1.51718	2.15246
SKIL	1.0002	2.15018
HSPA1L	1.27563	2.14762
AL137782.1	1.3096	2.14652
SLC16A9	2.90689	2.14101
AP000892.4	2.55915	2.14054
AC144831.1	1.60145	2.13984
FNIP2	1.0168	2.12873
RRAD	2.78606	2.12686
AC008687.6	2.11548	2.12549
TMEM121B	1.078	2.12549
AC009163.5	2.58496	2.12549
AC092718.8	2.58496	2.12549
AKR1C1	2.58496	2.12549
LRRC8B	1.5115	2.12404
RTN4R	1.45251	2.11778
CYTOR	1.26502	2.11246
AP000781.2	3	2.10999
RBM47	1.28688	2.10852
IFRD1	1.43724	2.10079
ARL4D	1.9203	2.09545
SCAT8	1.58496	2.09421
GOLGA8G	1.22741	2.08842
ZBED9	1.18442	2.07498
TUBB2B	1.64409	2.06978
MAK	2.45943	2.06647
FAM167B	1.48543	2.06647
GBP1	1.02568	2.06487
CEBPB-AS1	1.40439	2.0637
AL360270.3	2.11548	2.05702
GDNF	1.2718	2.05277
AL031666.2	3.41504	2.05277
AC040160.1	1.38466	2.05277
AC104794.3	2.1964	2.0467
DEC1	4.16993	2.03593
GSX2	1.27302	2.03593
ASNS	1.58496	2.035
STBD1	1.02148	2.03496
MYB	1.38405	2.03463
SYDE2	1.10874	2.03399
MMP9	2.926	2.02044
NFATC1	2.38247	2.01491
SLC25A34	1.95777	1.99818
IL7R	1.31664	1.99155
H1FX	1.61328	1.98223
AC116667.1	2.1375	1.98007
HEY1	1.63005	1.97835
SPATA2L	1.1354	1.97457
C11orf91	3.08746	1.9732
IMPDH1P10	2	1.9732
AREG	1.45066	1.96865
VGLL3	1.06724	1.96568
DDIT3	2.12423	1.96439
FSIP1	1.36427	1.96131
AL596325.2	1.80735	1.95638
LFNG	1.03814	1.9463
SERPINA3	2.47131	1.93869
PFKFB3	1.18508	1.93671
C2orf16	2.43296	1.93214
LINC02015	1.62449	1.93098
AC090192.2	2.23266	1.92913
NECTIN3-AS1	1.12029	1.92536
AC084880.1	3.23266	1.92496
AP000692.2	2.37851	1.92496
LRRC8E	1.04203	1.92432
NNMT	2.21251	1.92404
AC010186.2	1.21432	1.92376
TNFSF14	4.24793	1.92049
AL731571.1	1.8365	1.92049
RPL23AP74	1.8365	1.92049
ERN1	1.00692	1.90152
PRRG4	1.74802	1.89929
HOMER1	1.86099	1.89904
FLVCR2	3.5025	1.89769
AC104695.2	1.8413	1.89769
CPEB3	1.21632	1.89734
LINC00973	1.07539	1.89153
TMEM159	1.21666	1.89072
AC108704.2	1.49033	1.88957
STK38L	1.42634	1.88806
EBLN2	1.68806	1.88566
BEST1	1.43296	1.88081
AL627402.1	1.29956	1.8803
CYP51A1P1	3.70044	1.87826
AC005540.1	2.80735	1.87826
AC020928.1	2.80735	1.87826
ACTBP7	2.80735	1.87826
AL132639.3	2.80735	1.87826
SSUH2	2.80735	1.87826
AC133552.5	2	1.87826
HTRA4	2	1.87826
DEPTOR	1.1375	1.87826
ZNF229	1.04291	1.87557
XIRP1	5.8312	1.87332
VIM-AS1	1.16197	1.86988
BEX2	1.23266	1.86924
AC005229.4	1.05565	1.86124
RTL3	1.16993	1.85757
AL590438.1	1.29373	1.8371
LINC00622	4.9542	1.83557
ADRA2C	1.66297	1.83207
AP001330.4	2.90689	1.83207
LMCD1	1.34573	1.82544
AC092807.3	1.2134	1.82272
ISLR2	2.078	1.82138
TERT	1.12956	1.81954
TRIM36	1.29059	1.8182
AC090970.2	2.926	1.81741
FBXW4P1	1.58496	1.81528
AC097634.1	1.27302	1.81528
CYP1A1	2.19265	1.81233
FBXO32	1.03675	1.81201
C3orf80	1.75489	1.81064
CITED2	1.03647	1.80498
OTOGL	1.08746	1.80135
AC124068.2	2.45943	1.80135
KSR2	2.45943	1.80135
DUSP15	4	1.79558
AC009630.1	1.58496	1.79236
LINC00640	1.58496	1.79236
NRBF2P3	1.58496	1.79236
PPP5D1	1.58496	1.79236
AC087392.3	1.22239	1.79236
AC105206.1	3.16993	1.79236
AL390755.3	3.16993	1.79236
PCF11-AS1	3.16993	1.79236
CFHR1	2.22239	1.77471
HSPA4L	1.8786	1.77197
AC025171.1	1.05658	1.76998
AMH	1.30378	1.76705
GPR75	1.46566	1.76602
AC098487.1	1.24101	1.76208
CATSPERE	2.5025	1.74964
LINC01776	1.15754	1.74878
AL121603.2	1.05445	1.74308
AC016831.1	2.09954	1.74248
AL162586.1	1.73697	1.73157
MYCL	3.14296	1.72813
AF111167.2	4.80735	1.72574
GPR3	1.01394	1.72402
AC006460.2	1.02975	1.72354
AL645608.7	3.15249	1.72307
AL161431.1	1.73219	1.72295
RELT	1.21577	1.71565
AC098588.2	2.58496	1.71126
AL359834.1	2.58496	1.71126
AL139095.2	1.078	1.71126
HOXB9	3.32193	1.70135
Z99572.1	1.59864	1.69908
IPCEF1	1.66051	1.69839
IRF5	1.10535	1.69795
MERTK	1.08746	1.6812
AL390719.1	1.66051	1.67885
CRYM-AS1	2.63227	1.67242
AC139795.3	2	1.67138
MIR17HG	1.58496	1.67001
FZD5	1.00181	1.67001
AL096870.2	1.34792	1.66836
AC105046.1	5.52356	1.66211
FOXF1	2.974	1.66187
AC090197.1	2.02975	1.66047
LINC01119	1.12858	1.65794
LRRC4	3.11548	1.65698
AL356215.1	2.61143	1.65698
AC003092.1	3.03562	1.65695
PLEKHF1	1.49185	1.65661
H3F3C	1.53051	1.65228
PSG5	1.1375	1.64986
LONRF2	1.38333	1.64045
CD163L1	1.41504	1.63981
WFDC21P	3.64386	1.63977
AC087854.1	2.05889	1.63925
AC007879.3	2.32193	1.63423
CASZ1	1.68589	1.62475
AC105411.1	1.34792	1.6214
AC009065.1	1.80735	1.6178
FOLR3	1.80735	1.6178
HNRNPA1P54	1.80735	1.6178
RPL7P15	1.80735	1.6178
TIGD3	1.80735	1.6178
TTPA	1.80735	1.6178
PDE4B	1.04103	1.6178
C6orf141	1.1375	1.61526
HELB	1.5221	1.61239
PBX2P1	2.16993	1.60387
AC008687.7	1.73697	1.60387
AL138724.1	2.18345	1.60152
NOTUM	1.5025	1.5954
AC009093.9	3.58496	1.5954
AL355607.2	3.58496	1.5954
ST7-OT4	3.58496	1.5954
AL445985.1	1.90689	1.5954
EOMES	1.90689	1.5954
RAB33A	1.90689	1.5954
TTC6	1.5025	1.5954
AC127070.4	1.58496	1.58971
LAG3	1.22239	1.58971
LINC02154	4.48113	1.58041
AC008393.1	1.94753	1.57616
LRRC15	1.22239	1.57616
CDK3	1.26096	1.57333
AC078785.1	1.54432	1.57185
LINC00520	2.87447	1.56919
HOPX	1.29546	1.56868
AC016734.1	1.074	1.56686
AC022364.1	1.17477	1.56527
AC107956.1	1.10128	1.56289
AC104695.3	3.11548	1.56066
RNF150	1.4926	1.55943
AC092139.1	1.1375	1.54576
AC007068.1	1.69817	1.54423
GATM	4.24793	1.54109
CD2BP2-DT	1.12338	1.53744
AC021087.3	2.70044	1.5306
ESR1	1.61891	1.52582
SCHIP1	1.2084	1.5254
BX005040.4	1.29546	1.52407
INSYN1	1.58496	1.51828
GBX2	1.08517	1.51187
AC073130.3	1.18057	1.50688
ATP2B1-AS1	1.53051	1.50612
Z68871.1	1.23447	1.50451
KCNG3	1.66297	1.50341
AC016596.1	3.05889	1.50083
ST7-AS1	1.36257	1.50083
LINC00519	1.30117	1.49985
FMO4	1.09311	1.48804
C11orf94	2.80735	1.48575
AC004825.2	1.47393	1.48279
AC091978.1	1.08746	1.47532
FES	2.45943	1.47532
PKMP1	2.45943	1.47532
MPZ	1.48543	1.47532
LINC00884	1.12553	1.47301
BASP1-AS1	2.90689	1.47301
AC093525.9	2.11548	1.46713
KLHL38	1.68806	1.46713
RASGRP1	1.68806	1.46713
LINC00345	1.58496	1.46713
ADRB1	1.16993	1.46713
TMEM40	1.51457	1.46324
AP002387.2	1.20163	1.46324
CARMIL2	1.078	1.45928
MYOZ2	1.37851	1.45693
CKS2	1.30236	1.45545
AL022322.2	3	1.45385
NUDT9P1	3	1.45385
FAM189A2	3.08746	1.45268
FAM157C	1.42884	1.44578
EFCAB13	1.28951	1.44423
AC005865.1	1.56294	1.43565
IL12A	1.24345	1.43312
GASAL1	1.10825	1.42948
ZFHX2	1.05644	1.42428
HIST2H2AA4	4.74595	1.42181
AL662797.1	1.78427	1.42026
ODC1-DT	1.18641	1.41623
AP000944.5	1.53842	1.41559
ZNF20	1.45418	1.41172
AC090739.1	1.87447	1.40871
AL663070.1	1.87447	1.40871
CLDN6	1.58496	1.40871
PRKCG	1.22239	1.40871
DOCK9-DT	2.07039	1.40871
ABCC9	2.58496	1.40503
C19orf73	1.49476	1.40503
ELF3	4.90689	1.39477
AC068491.4	1.4245	1.39172
TLE1P1	1.15754	1.38617
ICOSLG	2.55459	1.38359
DNAH17	2.28011	1.38295
AC067852.3	1.65208	1.3735
LRRIQ3	1.52356	1.3735
AL022328.4	1.05063	1.3735
AC093838.2	1.4361	1.36817
AP001282.1	1.05658	1.36038
CDA	1.32193	1.35992
GPR37	1.44057	1.35992
ECM2	2.24793	1.35548
SSC4D	1.53343	1.35172
ZP1	2.66297	1.3439
AC092910.3	1.14296	1.33679
AC104581.4	1.21412	1.33386
Z95331.1	1.66985	1.33276
ROBO4	2.37197	1.32813
AC011611.3	2.32193	1.32403
AC079416.2	2.32193	1.32403
AL353708.1	2.32193	1.32403
CA3	2.32193	1.32403
CXXC5-AS1	2.32193	1.32403
FBXW11P1	2.32193	1.32403
HSP90AA4P	2.32193	1.32403
TNK2-AS1	2.32193	1.32403
YEATS2-AS1	2.32193	1.32403
WAKMAR2	2.32193	1.32403
RPL29P19	1.37851	1.32403
ARHGAP45	3.27302	1.32036
GPR183	2.06609	1.31103
AC092821.3	1.24101	1.30502

## Sheet: Significantly Down
gene_name	Log2FC	log10 p-value
ZNF792	-2.37346	3.95315
PPP1R3D	-1.42513	3.533
ZNF850	-1.4549	3.53293
MAB21L1	-2.45909	3.40319
OXSM	-1.38225	3.34839
ANKRD34A	-1.40509	3.27975
SIX1	-1.33281	3.25348
AL356235.1	-2.11548	3.25026
SALL2	-1.60039	3.23026
AC015813.1	-1.8625	3.21985
IQCC	-1.1481	3.1712
HEXIM1	-1.53502	3.10569
KCNRG	-1.83007	3.01594
GEMIN4	-1.34308	2.99216
MAP3K1	-1.18242	2.8908
ASB13	-1.232	2.77058
ZNF675	-1.02697	2.76472
OSR1	-2.83675	2.73876
FASTKD3	-1.12795	2.73064
RIMBP3	-2.88753	2.69492
MARS2	-1.61997	2.69169
ALKBH4	-1.58496	2.64097
ZSWIM1	-1.10962	2.62181
TMEM102	-1.10384	2.58699
RTL10	-1.10913	2.55672
C3orf35	-1.48543	2.50507
FP325335.1	-3.32193	2.50507
HILPDA	-1.41946	2.42888
TRHDE-AS1	-1.20353	2.39093
IMP3	-1.0308	2.38892
OTX2	-1.54297	2.37962
CCDC96	-1.68806	2.37213
FOXS1	-2.28358	2.34068
CU633906.5	-1.61005	2.32647
AC120053.1	-2.32193	2.31761
AC017104.1	-1.37851	2.31761
ZSWIM3	-1.20493	2.29264
AL096865.1	-1.07039	2.27343
ARMC7	-1.13452	2.24408
AUXG01000058.1	-4.15131	2.24174
CBX8	-1.17379	2.2381
LHX9	-1.0114	2.23625
AL353622.1	-3.70044	2.23503
DUSP4	-1.25581	2.22874
DDIT4L	-1.59337	2.21858
KLF2	-1.02508	2.21234
ZNF169	-1.33121	2.21203
ZNF658	-1.25576	2.18087
ZNF767P	-1.21348	2.16984
AC087482.1	-2.58496	2.12549
LINC02021	-2.58496	2.12549
MAP10	-2.58496	2.12549
PLK2	-1.62129	2.1129
AP001528.2	-3	2.10999
CLP1	-1.20276	2.10798
AC107871.1	-1.26303	2.09453
GVQW3	-1.29546	2.09421
AC242376.2	-1.89077	2.08576
UBAP1L	-1.08746	2.07964
ZNF8	-1.02066	2.07791
SPRY1	-2.94642	2.07677
ZNF174	-1.24171	2.05633
KBTBD3	-1.36257	2.05433
TTC30B	-1.9251	2.04211
ZNF879	-1.20945	2.02975
ZNF571	-1.20436	2.02636
MAB21L2	-1.13036	2.02285
CCDC87	-1.45066	2.02136
C1QTNF3	-1.58496	2.01417
AC107068.1	-1.43857	1.99741
ZNF214	-1.01381	1.96414
AL033527.2	-1.28011	1.95638
BMP4	-1.14171	1.95105
BMS1P4	-1.02308	1.94481
AP003465.2	-1.58496	1.94131
RUNDC1	-1.12199	1.92082
PITX2	-1.43063	1.91869
FOXE1	-1.08406	1.88202
AXIN2	-1.09311	1.88081
PCDHA4	-3.70044	1.87826
AMT	-1.6477	1.86404
ZNF225	-1.36182	1.86021
ZNF425	-1.21997	1.85723
PPP1R3C	-1.72705	1.84366
CBX2	-1.29504	1.84029
AC004076.2	-2.90689	1.83207
ZNF223	-1.09622	1.82949
ZNF503	-1.34521	1.8294
AC007996.1	-1.04182	1.80135
GUSBP9	-1.39855	1.80135
VN1R1	-2	1.79558
AL139287.1	-1.58496	1.79236
DNASE1L2	-1.14886	1.79236
RBM44	-1.22239	1.79236
C9orf147	-3.16993	1.79236
TAF5	-1.17991	1.79115
EGFL8	-1.75899	1.78712
GNRHR2	-1.78427	1.77471
ELMO3	-1.06711	1.77221
AL035071.1	-1.58496	1.76617
PTCD1	-1.01094	1.76412
MIR503HG	-1.078	1.71126
ADAMTS15	-1.0723	1.7063
AC078846.1	-1.04439	1.70188
ZKSCAN4	-1.46768	1.70111
FBXO42	-1.15769	1.70061
TUBB4A	-1.926	1.69697
HAS2	-1.27462	1.67831
ZNF221	-1.5325	1.67163
RFX3-AS1	-2	1.67138
AC009041.4	-1.1375	1.64986
GUCA1B	-1.37851	1.63423
ZNF250	-1.14923	1.62237
AC104563.1	-1.80735	1.6178
SNHG25	-1.80735	1.6178
ZFP14	-1.12374	1.61681
AC009962.1	-2.16993	1.60387
IGSF5	-2.16993	1.60387
AC243964.3	-1.51457	1.59378
DLK2	-1.078	1.58971
BX322650.1	-1.58496	1.58971
S100A1	-2.32193	1.58971
HYLS1	-1.13358	1.58374
ZNF703	-1.0706	1.57489
TENT5A	-1.86389	1.56427
EID2B	-1.2854	1.54969
NXPH3	-1.18057	1.50688
FKBPL	-1.19265	1.50036
AC048341.1	-1.24266	1.49715
AC053481.2	-1.44057	1.48575
AL118516.1	-1.05889	1.47301
SLC26A10	-1.41504	1.46713
AC096921.2	-1.58496	1.46713
ZNF530	-1.03847	1.45789
AC017104.4	-3	1.45385
ITFG2-AS1	-3	1.45385
PCDHA8	-3	1.45385
AC079145.1	-1.45943	1.45385
ANKLE1	-1.45943	1.45385
RND2	-1.82312	1.42582
MN1	-1.10029	1.42269
DGKG	-3.58496	1.42026
ZNF141	-1.02495	1.41346
ZNF324B	-1.03242	1.4007
SPAG8	-1.28951	1.39102
AC132938.5	-2.70044	1.37269
ACTL10	-1.04182	1.36407
TUBA3FP	-1.08092	1.33984
LINC01355	-1.22239	1.33666
AACSP1	-2.32193	1.32403
AC004837.4	-2.32193	1.32403
AC006130.3	-2.32193	1.32403
AC007450.4	-2.32193	1.32403
AC083843.4	-2.32193	1.32403
AC084824.4	-2.32193	1.32403
AC105446.1	-2.32193	1.32403
ACOT4	-2.32193	1.32403
AL122018.1	-2.32193	1.32403
AL137186.2	-2.32193	1.32403
AP000880.1	-2.32193	1.32403
HIST4H4	-2.32193	1.32403
PTPRN	-2.32193	1.32403
TTC23L	-2.32193	1.32403
AL136295.4	-1.48938	1.30009
