# Supplementary material for: Ubiquitination-activated TAB–TAK1–IKK–NF-κB axis modulates gene expression for cell survival in the lysosomal damage response
Source: bioRxiv preprint, doi:10.1101/2025.03.26.645624, version 2 (2025-07-31)
Supplement: Table S2 [file 645624_file03.xlsx]

## Sheet: Proteome after imputation
Protein.Group	Protein.Names	Genes	First.Protein.Description		2h1.raw	2h2.raw	2h3.raw	Control1.raw	Control2.raw	Control3.raw	Log2FC	LOG10 p-VALUE
P10145	IL8_HUMAN	CXCL8	Interleukin-8		26.4769	27.0084	26.8741	20.7983	19.3073	18.04	7.4046	3.09375
P28562	DUS1_HUMAN	DUSP1	Dual specificity protein phosphatase 1		25.4551	25.8118	25.8528	18.802	20.4469	19.6071	6.08792	3.61261
P19876	CXCL3_HUMAN	CXCL3	C-X-C motif chemokine 3		22.9513	24.1253	24.0105	19.799	19.9361	17.2674	4.69489	2.11622
Q9H8W3	F204A_HUMAN	FAM204A	Protein FAM204A		26.0894	25.9406	25.7077	25.7871	20.2114	17.722	4.67239	0.913987
P46695	IEX1_HUMAN	IER3	Radiation-inducible immediate-early gene IEX-1		23.2229	23.3376	23.4551	17.7719	19.6097	19.2836	4.45014	2.83772
P18847	ATF3_HUMAN	ATF3	Cyclic AMP-dependent transcription factor ATF-3		22.8365	23.5404	23.632	19.1218	18.7659	18.8107	4.43684	4.06338
Q9BYH8	IKBZ_HUMAN	NFKBIZ	NF-kappa-B inhibitor zeta		22.1488	23.4425	23.2214	18.7548	19.8271	17.0084	4.4075	2.07107
P13500	CCL2_HUMAN	CCL2	C-C motif chemokine 2		23.4676	23.5638	23.8385	18.0388	19.2607	20.4897	4.36022	2.43415
P24522	GA45A_HUMAN	GADD45A	Growth arrest and DNA damage-inducible protein GADD45 alpha		22.7471	22.5777	23.1765	19.7821	17.9734	18.0831	4.22093	2.63509
Q7Z4L0	COX8C_HUMAN	COX8C	Cytochrome c oxidase subunit 8C, mitochondrial		24.1946	26.1371	26.3595	19.7104	19.2773	25.2353	4.15604	0.954822
Q99075	HBEGF_HUMAN	HBEGF	Proheparin-binding EGF-like growth factor		23.8858	23.1127	23.5522	20.4078	19.6515	18.2486	4.08091	2.43247
Q9NQX7	ITM2C_HUMAN	ITM2C	Integral membrane protein 2C		23.5638	23.5404	24.002	19.8919	18.8151	20.3047	4.03149	2.99821
P0CG47;P0CG48	UBB_HUMAN;UBC_HUMAN	UBB;UBC	Polyubiquitin-B		24.989	24.9406	24.8528	19.5879	21.9024	21.714	3.85937	2.18395
P09341	GROA_HUMAN	CXCL1	Growth-regulated alpha protein		21.8269	22.9043	22.5754	18.7292	18.9688	18.1949	3.80454	3.19854
Q6TDP4	KLH17_HUMAN	KLHL17	Kelch-like protein 17		20.8651	20.7056	21.714	17.0474	17.7389	17.1803	3.7727	3.24743
Q86YV9	HPS6_HUMAN	HPS6	BLOC-2 complex member HPS6		28.1652	22.6562	28.2308	22.6164	22.5731	22.5983	3.75479	0.951182
Q4G0N7	F229B_HUMAN	FAM229B	Protein FAM229B		24.0359	24.6811	24.8811	23.9672	18.8676	19.5676	3.7319	1.08551
Q14995	NR1D2_HUMAN	NR1D2	Nuclear receptor subfamily 1 group D member 2		23.6209	23.417	22.1642	20.2066	19.1776	19.0456	3.59079	2.44758
P05231	IL6_HUMAN	IL6	Interleukin-6		23.181	22.8689	23.1269	19.0383	18.9069	20.4878	3.58128	2.6466
O95166	GBRAP_HUMAN	GABARAP	Gamma-aminobutyric acid receptor-associated protein		22.7776	23.0292	23.2288	19.4894	19.6917	19.1337	3.57355	4.16439
Q9H2F5	EPC1_HUMAN	EPC1	Enhancer of polycomb homolog 1		22.7895	22.0854	22.1856	18.529	18.609	19.4804	3.48067	3.12183
P18146	EGR1_HUMAN	EGR1	Early growth response protein 1		23.2006	23.9672	23.7077	19.767	20.6364	20.4775	3.33149	3.17004
Q9UKL6	PPCT_HUMAN	PCTP	Phosphatidylcholine transfer protein		24.0105	24.1565	24.2961	20.1488	24.1565	18.5187	3.21303	0.8932
P15018	LIF_HUMAN	LIF	Leukemia inhibitory factor		25.1174	25.1757	25.2996	22.1581	21.823	21.9777	3.21133	5.07493
P52744	ZN138_HUMAN	ZNF138	Zinc finger protein 138		24.7182	24.9628	24.558	20.4632	19.1991	25.0275	3.18304	0.832024
Q00973	B4GN1_HUMAN	B4GALNT1	Beta-1,4 N-acetylgalactosaminyltransferase 1		24.0359	23.5522	23.2021	18.8693	19.2269	23.155	3.17966	1.07216
P10914	IRF1_HUMAN	IRF1	Interferon regulatory factor 1		21.3101	21.6714	21.6006	17.5846	18.2853	19.2004	3.17059	2.56266
Q14511	CASL_HUMAN	NEDD9	Enhancer of filamentation 1		21.6409	21.8651	22.0559	17.7814	19.0332	19.3219	3.14181	2.52444
P55040	GEM_HUMAN	GEM	GTP-binding protein GEM		22.6453	22.8689	22.8034	18.2711	21.3538	19.4131	3.09319	1.57549
P26651	TTP_HUMAN	ZFP36	mRNA decay activator protein ZFP36		20.6096	21.5261	21.3752	18.7809	17.1955	18.3141	3.07346	2.30034
O60507	TPST1_HUMAN	TPST1	Protein-tyrosine sulfotransferase 1		24.0275	23.3511	23.3778	23.976	19.3334	18.4849	2.98739	0.802504
Q8NI60	COQ8A_HUMAN	COQ8A	Atypical kinase COQ8A, mitochondrial		20.4476	21.4726	24.7695	19.7655	20.1457	18.0017	2.9256	0.935935
P01100	FOS_HUMAN	FOS	Protein c-Fos		21.6971	23.2214	22.6779	20.7231	19.4294	18.878	2.85529	1.80901
Q969P5	FBX32_HUMAN	FBXO32	F-box only protein 32		21.6006	21.3376	21.1395	18.8261	18.8244	18.0199	2.80238	3.13689
Q15633	TRBP2_HUMAN	TARBP2	RISC-loading complex subunit TARBP2		27.1507	22.5475	26.6998	22.8423	22.5475	22.632	2.79206	0.886444
P04035	HMDH_HUMAN	HMGCR	3-hydroxy-3-methylglutaryl-coenzyme A reductase		24.8576	24.3975	24.3444	22.6342	22.1047	20.5823	2.7594	1.91078
Q6UXR6	YI004_HUMAN	UNQ6494/PRO21346	Putative uncharacterized protein UNQ6494/PRO21346		19.9091	19.0693	18.6382	16.655	16.3563	16.3651	2.74676	2.68656
O14607	UTY_HUMAN	UTY	Histone demethylase UTY		19.5488	19.3951	26.8264	19.6784	18.8582	19.0128	2.74031	0.483408
P21580	TNAP3_HUMAN	TNFAIP3	Tumor necrosis factor alpha-induced protein 3		22.417	22.5777	22.6822	20.4972	20.0156	18.9639	2.73339	2.3982
P49716	CEBPD_HUMAN	CEBPD	CCAAT/enhancer-binding protein delta		21.4825	22.0756	22.1673	19.2213	19.6454	18.6656	2.73104	2.81023
A0A1B0GUA5	SIM32_HUMAN	SMIM32	Small integral membrane protein 32		24.918	24.6649	24.0772	18.1135	25.1833	22.1946	2.72292	0.589143
Q9H063	MAF1_HUMAN	MAF1	Repressor of RNA polymerase III transcription MAF1 homolog		23.867	23.6649	23.7286	19.728	19.7192	23.7286	2.69493	0.943358
Q8IZU2	WDR17_HUMAN	WDR17	WD repeat-containing protein 17		20.9459	20.9171	21.5731	16.6152	19.6336	19.1053	2.69404	1.32081
Q9UKB3	DJC12_HUMAN	DNAJC12	DnaJ homolog subfamily C member 12		22.9899	23.7492	23.5869	20.7345	19.4364	22.1426	2.67083	1.51483
Q16281	CNGA3_HUMAN	CNGA3	Cyclic nucleotide-gated channel alpha-3		26.3135	24.1488	19.5372	20.8802	20.6276	20.6364	2.61847	0.584055
Q70SY1	CR3L2_HUMAN	CREB3L2	Cyclic AMP-responsive element-binding protein 3-like protein 2		20.4476	21.2764	22.7594	20.7471	18.5577	17.4115	2.589	1.02185
Q96FS4	SIPA1_HUMAN	SIPA1	Signal-induced proliferation-associated protein 1		26.6998	26.632	22.8365	22.3778	23.4041	22.8461	2.51343	0.894148
Q6P575	BGP11_HUMAN	GUSBP11	Putative inactive beta-glucuronidase protein GUSBP11		23.0359	23.2821	23.5869	18.8853	23.48	20.0049	2.51155	0.836834
Q9H093	NUAK2_HUMAN	NUAK2	NUAK family SNF1-like kinase 2		21.7675	21.8764	21.7675	18.9071	20.0896	18.9153	2.49981	2.4983
Q96G74	OTUD5_HUMAN	OTUD5	OTU domain-containing protein 5		24.9495	24.2243	24.632	18.4304	23.6209	24.317	2.4792	0.592906
O14503	BHE40_HUMAN	BHLHE40	Class E basic helix-loop-helix protein 40		24.0935	24.239	24.2607	21.7876	21.9916	21.4375	2.45884	3.87551
B9A064	IGLL5_HUMAN	IGLL5	Immunoglobulin lambda-like polypeptide 5		22.3511	22.4196	22.4825	22.2961	19.0844	18.4972	2.45844	0.975179
P0CW27	CC166_HUMAN	CCDC166	Coiled-coil domain-containing protein 166		22.5117	23.5522	22.2036	19.7941	21.6141	19.6909	2.38943	1.48398
Q99612	KLF6_HUMAN	KLF6	Krueppel-like factor 6		21.7182	21.8346	22.0359	20.246	18.97	19.3559	2.33893	2.41406
Q9Y3B1	PLD3B_HUMAN	PRELID3B	PRELI domain containing protein 3B		19.328	19.066	26.6595	20.7796	18.4765	18.8982	2.29973	0.372307
A4D2B8	PM2P1_HUMAN	PMS2P1	Putative postmeiotic segregation increased 2-like protein 1		21.2066	21.0756	21.2006	18.6318	18.444	19.6562	2.25028	2.39385
Q15776	ZKSC8_HUMAN	ZKSCAN8	Zinc finger protein with KRAB and SCAN domains 8		23.654	23.1673	22.7955	22.6276	20.4273	19.8866	2.22512	1.1963
P01584	IL1B_HUMAN	IL1B	Interleukin-1 beta		22.6409	22.8576	22.8034	20.2989	20.6186	20.8034	2.19362	3.77357
Q9H0R1	AP5M1_HUMAN	AP5M1	AP-5 complex subunit mu-1		21.8073	22.3672	21.9024	20.5545	20.3538	18.6268	2.18062	1.57597
Q9BX59	TPSNR_HUMAN	TAPBPL	Tapasin-related protein		23.7695	24.1719	23.5983	23.0935	23.6865	18.2475	2.17078	0.555767
P29275	AA2BR_HUMAN	ADORA2B	Adenosine receptor A2b		22.1976	22.4041	22.6119	18.16	23.1111	19.4564	2.16204	0.658237
P58180	OR4D2_HUMAN	OR4D2	Olfactory receptor 4D2		17.0017	20.1095	20.2492	16.6069	17.0936	17.189	2.15698	0.938121
Q52LA3	LIN52_HUMAN	LIN52	Protein lin-52 homolog		21.3805	20.714	23.4425	20.4067	19.028	19.6976	2.13491	1.09993
P13051	UNG_HUMAN	UNG	Uracil-DNA glycosylase		25.0359	22.002	25.2785	25.0772	21.2125	19.7009	2.10856	0.477506
Q8NCD3	HJURP_HUMAN	HJURP	Holliday junction recognition protein		21.1457	24.4105	19.0654	17.9911	22.0886	18.2893	2.08422	0.4382
P51649	SSDH_HUMAN	ALDH5A1	Succinate-semialdehyde dehydrogenase, mitochondrial		21.4972	27.6798	21.5356	20.5638	22.1301	21.823	2.06523	0.416766
P0DMQ5	INAM2_HUMAN	INAFM2	Putative transmembrane protein INAFM2		18.6484	15.513	18.99	15.5918	15.5816	15.8342	2.04798	0.858026
Q9NX09	DDIT4_HUMAN	DDIT4	DNA damage-inducible transcript 4 protein		21.9672	22.3457	22.2448	19.9402	20.714	19.7636	2.04665	2.5486
Q8NCN4	RN169_HUMAN	RNF169	E3 ubiquitin-protein ligase RNF169		24.8576	24.8997	25.0894	18.7827	25.0772	24.8623	2.04148	0.421679
Q5BKX5	ACTMP_HUMAN	ACTMAP	Actin maturation protease		21.8987	22.8895	22.3962	22.0625	18.9439	20.0691	2.03632	0.999536
P08476	INHBA_HUMAN	INHBA	Inhibin beta A chain		23.3778	23.1658	23.2821	21.5638	20.8423	21.3211	2.03279	3.11267
Q86W10	CP4Z1_HUMAN	CYP4Z1	Cytochrome P450 4Z1		18.396	23.1916	19.9316	18.0657	19.1337	18.2264	2.03111	0.629777
P02458	CO2A1_HUMAN	COL2A1	Collagen alpha-1(II) chain		24.4041	24.3511	24.5754	22.4501	22.3101	22.48	2.03013	4.72736
Q9Y534	CSDC2_HUMAN	CSDC2	Cold shock domain-containing protein C2		19.7536	18.4656	18.9846	16.8584	16.9306	17.3418	2.02432	2.13147
Q9H9J4	UBP42_HUMAN	USP42	Ubiquitin carboxyl-terminal hydrolase 42		24.1332	21.2877	24.5983	20.1079	19.614	24.2317	2.02187	0.491537
A0A075B6Z8	A0A075B6Z8_HUMAN	TRAJ25	T cell receptor alpha joining 25 (non-functional) (Fragment)		19.9555	18.6659	19.0893	17.3056	17.2364	17.1479	2.00695	2.20095
P51957	NEK4_HUMAN	NEK4	Serine/threonine-protein kinase Nek4		26.1719	26.1234	26.0813	19.4741	26.4504	26.5374	1.97154	0.349735
Q8N130	NPT2C_HUMAN	SLC34A3	Sodium-dependent phosphate transport protein 2C		20.2877	21.6276	22.417	19.646	19.6954	19.1164	1.95817	1.40689
Q12962	TAF10_HUMAN	TAF10	Transcription initiation factor TFIID subunit 10		21.8152	21.9134	21.8346	21.8689	18.5308	19.4238	1.91324	0.893609
Q8IVT5	KSR1_HUMAN	KSR1	Kinase suppressor of Ras 1		26.604	27.632	26.8385	26.9088	21.7995	26.673	1.8977	0.487679
Q330K2	NDUF6_HUMAN	NDUFAF6	NADH dehydrogenase (ubiquinone) complex I, assembly factor 6		23.3778	23.9584	23.9672	23.2361	23.4551	19.002	1.87006	0.568463
P53539	FOSB_HUMAN	FOSB	Protein FosB		21.2243	22.2792	22.155	19.6772	19.9459	20.4273	1.86938	2.02764
P0DJI8	SAA1_HUMAN	SAA1	Serum amyloid A-1 protein		22.714	21.6671	22.8858	19.298	19.6186	22.8385	1.83725	0.702512
Q9NPR9	GP108_HUMAN	GPR108	Protein GPR108		24.867	24.4862	24.6918	22.6074	22.6497	23.2821	1.83529	2.77408
P35354	PGH2_HUMAN	PTGS2	Prostaglandin G/H synthase 2		20.3962	21.1825	21.4221	18.2508	19.2517	20.0083	1.83004	1.42887
Q13118	KLF10_HUMAN	KLF10	Krueppel-like factor 10		21.5869	21.3101	21.4726	20.56	19.318	19.0598	1.81062	1.7384
Q9BWT3	PAPOG_HUMAN	PAPOLG	Poly(A) polymerase gamma		22.7836	22.5731	22.6907	23.019	22.5961	17.0225	1.80326	0.393914
Q9NV64	TM39A_HUMAN	TMEM39A	Transmembrane protein 39A		21.4324	22.7776	21.714	19.9316	19.9882	20.6096	1.79818	1.74799
Q86V71	ZN429_HUMAN	ZNF429	Zinc finger protein 429		19.2134	19.6004	20.1871	18.4615	17.4935	17.6549	1.79704	1.91909
Q5VSY0	GKAP1_HUMAN	GKAP1	G kinase-anchoring protein 1		22.0691	21.9882	21.9061	21.7223	18.6715	20.1838	1.79523	0.952659
Q13794	APR_HUMAN	PMAIP1	Phorbol-12-myristate-13-acetate-induced protein 1		21.7634	21.8152	21.6714	20.7715	18.6463	20.4476	1.79488	1.27118
P61587	RND3_HUMAN	RND3	Rho-related GTP-binding protein RhoE		24.6971	24.7024	24.824	23.0241	22.7471	23.0805	1.79057	4.06302
Q99967	CITE2_HUMAN	CITED2	Cbp/p300-interacting transactivator 2		21.8307	21.895	22.3538	20.0951	19.9459	20.6714	1.78906	2.53596
P17275	JUNB_HUMAN	JUNB	Transcription factor JunB		25.7208	26.3256	26.4999	24.4923	24.7745	23.9584	1.77369	2.2086
Q8NFN8	GP156_HUMAN	GPR156	Probable G-protein coupled receptor 156		20.6096	21.7265	20.8802	20.4067	20.2419	17.2638	1.76797	0.755809
O14807	RASM_HUMAN	MRAS	Ras-related protein M-Ras		25.5725	20.0951	21.1519	20.7955	20.5915	20.1825	1.74999	0.445818
Q9BYR6	KRA33_HUMAN	KRTAP3-3	Keratin-associated protein 3-3		24.6865	24.6375	24.6096	24.632	24.6757	19.3967	1.74308	0.424539
Q9UQQ2	SH2B3_HUMAN	SH2B3	SH2B adapter protein 3		22.6276	21.6843	18.2081	22.5983	18.0252	16.6685	1.74263	0.318503
A6NLW8	DUXA_HUMAN	DUXA	Double homeobox protein A		19.7899	20.3036	19.7706	18.1557	18.2729	18.2163	1.73973	3.21379
Q8NDX9	LY65B_HUMAN	LY6G5B	Lymphocyte antigen 6 complex locus protein G5b		25.632	25.9738	25.3066	25.9248	26.3762	19.4047	1.73557	0.313859
Q96EF0	MTMR8_HUMAN	MTMR8	Myotubularin-related protein 8		23.211	18.3722	22.6051	17.8672	18.6125	22.5213	1.72908	0.340974
Q12778	FOXO1_HUMAN	FOXO1	Forkhead box protein O1		22.8614	22.9742	22.9406	22.3184	22.3619	19.0229	1.691	0.696553
Q9BUN1	MENT_HUMAN	MENT	Protein MENT		22.1976	19.488	20.2877	19.5157	17.8519	19.6027	1.66769	0.780547
Q68DK2	ZFY26_HUMAN	ZFYVE26	Zinc finger FYVE domain-containing protein 26		22.5615	22.3538	22.7594	22.7203	22.6671	17.3014	1.66199	0.388912
Q9NQE9	HINT3_HUMAN	HINT3	Adenosine 5'-monophosphoramidase HINT3		25.0317	26.8142	26.6181	23.0935	23.3376	27.0914	1.64718	0.511337
Q9NU53	GINM1_HUMAN	GINM1	Glycoprotein integral membrane protein 1		21.343	20.9243	20.9388	20.2989	19.0333	18.9549	1.63966	1.63926
Q15327	ANKR1_HUMAN	ANKRD1	Ankyrin repeat domain-containing protein 1		26.2151	26.0484	26.4202	24.4425	25.1449	24.217	1.62645	2.25413
Q07352	TISB_HUMAN	ZFP36L1	mRNA decay activator protein ZFP36L1		28.4823	28.2216	28.2935	26.8858	26.5898	26.8019	1.57331	3.74518
Q9NRX6	KISHB_HUMAN	TMEM167B	Protein kish-B		23.5983	23.6209	23.7077	23.48	19.1135	23.6649	1.55613	0.450278
Q9BTP7	FAP24_HUMAN	FAAP24	Fanconi anemia core complex-associated protein 24		22.2066	21.6929	21.6971	19.1958	19.8105	21.9243	1.55532	0.856788
P29279	CCN2_HUMAN	CCN2	CCN family member 2		26.8858	26.9869	27.141	25.2926	25.3877	25.6865	1.54894	3.42143
O43422	P52K_HUMAN	THAP12	52 kDa repressor of the inhibitor of the protein kinase		23.3101	23.2125	23.0967	22.5093	23.417	19.0772	1.53861	0.509348
Q14289	FAK2_HUMAN	PTK2B	Protein-tyrosine kinase 2-beta		21.5638	21.8113	21.8538	21.4526	21.4825	17.6798	1.53799	0.535839
Q9H939	PPIP2_HUMAN	PSTPIP2	Proline-serine-threonine phosphatase-interacting protein 2		21.4775	21.2361	18.7156	19.2115	18.6991	18.9366	1.52733	0.787053
Q6UWJ8	C16L2_HUMAN	CD164L2	CD164 sialomucin-like 2 protein		19.8386	20.5261	19.9167	19.077	18.086	18.5891	1.50978	1.86427
Q8NH93	OR1L3_HUMAN	OR1L3	Olfactory receptor 1L3		19.2441	21.5309	19.2087	17.7051	17.8054	19.9742	1.49965	0.633539
P02649	APOE_HUMAN	APOE	Apolipoprotein E		24.1565	23.9043	23.8764	22.6029	22.2332	22.6029	1.49945	3.22664
A0A7P0TAN4	A0A7P0TAN4_HUMAN	LOC122539214	Uncharacterized protein		16.7233	16.5514	20.3303	16.4557	16.3288	16.3276	1.49763	0.535786
Q5SVZ6	ZMYM1_HUMAN	ZMYM1	Zinc finger MYM-type protein 1		22.8987	22.7895	23.0139	22.5592	23.0886	18.5866	1.48926	0.450859
Q12756	KIF1A_HUMAN	KIF1A	Kinesin-like protein KIF1A		21.6364	18.5878	18.5461	19.0067	17.6917	17.6098	1.48737	0.594343
Q14624	ITIH4_HUMAN	ITIH4	Inter-alpha-trypsin inhibitor heavy chain H4		22.7735	22.239	23.5983	20.895	20.8651	22.3988	1.48394	1.086
Q06609	RAD51_HUMAN	RAD51	DNA repair protein RAD51 homolog 1		23.4041	21.5117	20.0559	19.1415	20.3211	21.0756	1.4778	0.588783
Q96B67	ARRD3_HUMAN	ARRDC3	Arrestin domain-containing protein 3		20.7553	20.654	20.6364	19.3535	19.2443	19.0351	1.47098	3.89743
Q8N8J7	F241A_HUMAN	FAM241A	Uncharacterized protein FAM241A		19.9316	20.1079	20.1581	19.4615	19.3283	16.9949	1.47093	0.849995
Q9Y343	SNX24_HUMAN	SNX24	Sorting nexin-24		22.821	22.7594	22.0054	20.5915	20.2535	22.3538	1.46234	0.97622
Q8IV53	DEN1C_HUMAN	DENND1C	DENN domain-containing protein 1C		21.9637	22.2593	19.6363	21.6231	18.2596	19.5933	1.46108	0.497415
Q5FWF4	ZRAB3_HUMAN	ZRANB3	DNA annealing helicase and endonuclease ZRANB3		23.8764	19.9	20.002	19.5593	20.1581	19.7033	1.45259	0.477167
Q6UWT4	CE046_HUMAN	C5orf46	Uncharacterized protein C5orf46		20.6622	16.2733	16.2522	16.4328	16.1637	16.2676	1.44122	0.41796
P51854	TKTL1_HUMAN	TKTL1	Transketolase-like protein 1		21.8987	22.2155	19.8824	17.7628	21.6497	20.3037	1.42681	0.454288
P0C7T5	ATX1L_HUMAN	ATXN1L	Ataxin-1-like		22.5451	22.0723	22.5545	21.8113	21.1581	19.9276	1.42499	1.16595
B7ZBB8	PP13G_HUMAN	PPP1R3G	Protein phosphatase 1 regulatory subunit 3G		20.6628	21.7995	21.1825	20.9505	18.0065	20.417	1.42359	0.670522
Q8N3J5	PPM1K_HUMAN	PPM1K	Protein phosphatase Mn(2+)-dependent 1K		22.1673	17.9234	17.7506	16.1772	17.9919	19.4417	1.41014	0.337525
P19086	GNAZ_HUMAN	GNAZ	Guanine nucleotide-binding protein G(z) subunit alpha		23.1143	22.928	22.7634	23.0821	18.6201	22.9152	1.39605	0.404238
P0DKL9	A14EL_HUMAN	ARL14EPL	ARL14 effector protein-like		23.5045	23.5045	23.4425	19.4634	23.2961	23.5165	1.39181	0.456074
Q9BXS9	S26A6_HUMAN	SLC26A6	Solute carrier family 26 member 6		22.0393	25.3204	21.5823	21.4972	21.4576	21.8307	1.3855	0.513404
Q6P1R3	MSD2_HUMAN	MSANTD2	Myb/SANT-like DNA-binding domain-containing protein 2		22.8249	22.9829	22.502	18.9186	22.7935	22.4576	1.38004	0.480599
P22760	AAAD_HUMAN	AADAC	Arylacetamide deacetylase		20.0951	20.1704	20.9024	17.6175	22.1269	17.3117	1.37056	0.362472
Q96Q27	ASB2_HUMAN	ASB2	Ankyrin repeat and SOCS box protein 2		21.7955	19.7469	20.0559	19.4145	19.4808	18.6023	1.36693	0.915282
Q9Y3D3	RT16_HUMAN	MRPS16	Small ribosomal subunit protein bS16m		24.7024	28.0296	24.3444	24.3444	24.2096	24.4234	1.36634	0.509305
Q9H0R6	GATA_HUMAN	QRSL1	Glutamyl-tRNA(Gln) amidotransferase subunit A, mitochondrial		24.0609	23.9672	23.9584	22.5045	24.002	21.391	1.363	0.835034
P26022	PTX3_HUMAN	PTX3	Pentraxin-related protein PTX3		25.6292	25.4707	25.3273	24.2535	24.0935	24.0105	1.3566	3.56462
Q96CS7	PKHB2_HUMAN	PLEKHB2	Pleckstrin homology domain-containing family B member 2		21.4375	21.0951	21.1206	19.025	20.6453	19.9341	1.3496	1.31239
P42261	GRIA1_HUMAN	GRIA1	Glutamate receptor 1		19.6828	24.5045	20.1704	20.4874	18.5579	21.2764	1.34532	0.31811
P49798	RGS4_HUMAN	RGS4	Regulator of G-protein signaling 4		20.6186	20.4476	20.6453	18.8931	18.7462	20.038	1.3447	1.50582
Q96JA3	PKHA8_HUMAN	PLEKHA8	Pleckstrin homology domain-containing family A member 8		20.5545	20.6453	19.8624	19.7921	18.1541	19.0821	1.34465	1.18207
P26367	PAX6_HUMAN	PAX6	Paired box protein Pax-6		22.0691	22.0658	22.0625	21.5961	19.1727	21.4067	1.34067	0.79585
Q6P5Q4	LMOD2_HUMAN	LMOD2	Leiomodin-2		20.0156	19.8108	20.5638	17.2092	19.3093	19.8773	1.33147	0.723629
Q8WU17	RN139_HUMAN	RNF139	E3 ubiquitin-protein ligase RNF139		22.8802	23.0854	22.1916	18.9492	22.7035	22.5309	1.32454	0.455755
O75175	CNOT3_HUMAN	CNOT3	CCR4-NOT transcription complex subunit 3		23.7796	25.7155	25.7155	23.9043	23.6757	23.6865	1.31474	0.946939
Q96DD7	SHSA4_HUMAN	SHISA4	Protein shisa-4		22.2621	22.9795	22.7327	18.4625	22.9601	22.6342	1.30582	0.374087
Q9ULX9	MAFF_HUMAN	MAFF	Transcription factor MafF		22.9864	23.1795	23.2125	21.5638	21.6141	22.2849	1.30519	2.23712
Q6N022	TEN4_HUMAN	TENM4	Teneurin-4		22.1457	22.1395	22.5915	18.0682	22.3565	22.538	1.30463	0.372178
P53675	CLH2_HUMAN	CLTCL1	Clathrin heavy chain 2		21.6186	21.502	21.2006	18.9471	20.0459	21.4324	1.29861	0.824604
Q8N8N0	RN152_HUMAN	RNF152	E3 ubiquitin-protein ligase RNF152		18.9603	19.3447	20.0482	18.507	18.2218	17.7391	1.29513	1.53417
Q9BTL4	IER2_HUMAN	IER2	Immediate early response gene 2 protein		18.5417	19.5223	18.9892	17.8529	18.1466	17.1716	1.29403	1.48198
Q9H1N7	S35B3_HUMAN	SLC35B3	Adenosine 3'-phospho 5'-phosphosulfate transporter 2		21.6231	22.0224	22.1143	21.9495	22.3017	17.6613	1.28241	0.356021
Q8NAP3	ZBT38_HUMAN	ZBTB38	Zinc finger and BTB domain-containing protein 38		23.3645	22.5213	23.0886	22.4092	21.4221	21.3045	1.27952	1.39016
O43597	SPY2_HUMAN	SPRY2	Protein sprouty homolog 2		21.9024	21.5498	21.6757	21.1704	20.9388	19.2018	1.27234	0.945292
Q96G91	P2Y11_HUMAN	P2RY11	P2Y purinoceptor 11		21.3538	21.714	22.1916	22.867	16.9465	21.632	1.27129	0.281303
Q6P1R4	DUS1L_HUMAN	DUS1L	tRNA-dihydrouridine(16/17) synthase [NAD(P)(+)]-like		23.6209	23.7695	19.9459	23.654	20.0951	19.7869	1.26677	0.290844
Q8IXH6	T53I2_HUMAN	TP53INP2	Tumor protein p53-inducible nuclear protein 2		21.7348	21.9423	21.7955	20.9601	21.8538	18.862	1.26559	0.64287
Q9NX65	ZSC32_HUMAN	ZSCAN32	Zinc finger and SCAN domain-containing protein 32		21.7796	21.7634	21.9098	20.3297	22.1426	19.2114	1.25637	0.665996
Q6NSJ0	MYORG_HUMAN	MYORG	Myogenesis-regulating glycosidase		21.0886	21.4923	21.2243	21.6843	19.1596	19.2002	1.25373	0.675127
Q8N3Z3	GTPB8_HUMAN	GTPBP8	GTP-binding protein 8		23.8191	23.9316	24.019	20.9882	23.5165	23.5165	1.24949	0.6712
P02647	APOA1_HUMAN	APOA1	Apolipoprotein A-I		26.2553	25.5404	26.3066	25.2243	24.3578	24.7846	1.24518	1.61949
Q9BXS4	TMM59_HUMAN	TMEM59	Transmembrane protein 59		24.0526	24.1095	24.2096	22.6822	23.0426	22.9116	1.24508	3.38578
Q9BX74	TM2D1_HUMAN	TM2D1	TM2 domain-containing protein 1		20.3752	17.1481	19.3363	19.4332	17.5688	16.1238	1.2446	0.388601
Q8WZ60	KLHL6_HUMAN	KLHL6	Kelch-like protein 6		22.5662	22.2736	21.3805	18.5643	21.6929	22.2361	1.24232	0.445535
P15692	VEGFA_HUMAN	VEGFA	Vascular endothelial growth factor A, long form		21.4526	21.8385	21.7307	21.2243	18.678	21.3962	1.24106	0.630715
P09565	IG2R_HUMAN	GIG44	Putative insulin-like growth factor 2-associated protein		19.9459	19.8543	19.5317	18.8629	18.0261	18.7201	1.24091	1.90437
Q5TEU4	NDUF5_HUMAN	NDUFAF5	Arginine-hydroxylase NDUFAF5, mitochondrial		23.0173	23.2535	23.1976	23.417	23.3101	19.0221	1.23975	0.356041
P53816	PLAT3_HUMAN	PLAAT3	Phospholipase A and acyltransferase 3		23.1658	24.4923	23.1946	22.6387	21.9352	22.5615	1.23911	1.18664
Q13825	AUHM_HUMAN	AUH	Methylglutaconyl-CoA hydratase, mitochondrial		19.8737	20.4375	20.4067	19.6512	18.7437	18.6158	1.23572	1.52624
P16233	LIPP_HUMAN	PNLIP	Pancreatic triacylglycerol lipase		18.9916	18.4455	19.7399	17.4927	18.0916	17.8998	1.23096	1.38508
Q9UPQ7	PZRN3_HUMAN	PDZRN3	E3 ubiquitin-protein ligase PDZRN3		21.9316	21.8913	21.5451	21.6006	21.6671	18.4168	1.22784	0.496374
Q9UN30	SCML1_HUMAN	SCML1	Sex comb on midleg-like protein 1		19.573	19.6489	19.4249	19.187	17.7982	17.9825	1.2264	1.30465
Q07820	MCL1_HUMAN	MCL1	Induced myeloid leukemia cell differentiation protein Mcl-1		23.7796	24.2021	23.8858	22.6671	22.6886	22.8327	1.22636	3.06306
P17025	ZN182_HUMAN	ZNF182	Zinc finger protein 182		21.0292	22.0054	24.0359	21.7348	21.6096	20.0691	1.21899	0.516904
Q9H2K0	IF3M_HUMAN	MTIF3	Translation initiation factor IF-3, mitochondrial		22.0122	21.4273	23.5165	20.1332	21.2933	21.8727	1.21894	0.688792
Q9NWZ5	UCKL1_HUMAN	UCKL1	Uridine-cytidine kinase-like 1		22.9225	23.0309	22.3184	21.6276	21.4476	21.5451	1.21717	2.22906
Q8N6G2	TEX26_HUMAN	TEX26	Testis-expressed protein 26		20.7056	20.6096	20.6096	17.9309	20.3962	19.9548	1.2143	0.732401
Q92558	WASF1_HUMAN	WASF1	Actin-binding protein WASF1		25.8288	24.9539	24.7389	24.3844	22.4425	25.0975	1.19908	0.627259
Q92994	TF3B_HUMAN	BRF1	Transcription factor IIIB 90 kDa subunit		22.8913	20.4972	22.417	21.2361	20.3962	20.6453	1.17597	0.692735
Q08334	I10R2_HUMAN	IL10RB	Interleukin-10 receptor subunit beta		21.3321	21.0088	21.265	21.0659	18.4183	20.5995	1.17409	0.645226
Q9UK39	NOCT_HUMAN	NOCT	Nocturnin		22.7223	22.9864	23.0476	21.7836	21.5777	21.8802	1.17163	3.02753
Q8NB49	AT11C_HUMAN	ATP11C	Phospholipid-transporting ATPase IG		24.5869	22.7614	24.48	22.6865	22.6693	22.9637	1.16965	0.911367
P02656	APOC3_HUMAN	APOC3	Apolipoprotein C-III		21.2419	20.2877	21.2361	20.0426	19.1747	20.0691	1.15978	1.25912
Q6MZQ0	PRR5L_HUMAN	PRR5L	Proline-rich protein 5-like		21.2989	21.0156	21.5404	18.1321	21.2243	21.0359	1.1542	0.49781
Q9H7Y0	DIK2B_HUMAN	DIPK2B	Divergent protein kinase domain 2B		20.8269	19.0769	19.2304	18.7391	18.3543	18.5889	1.15062	0.943313
Q9Y3C7	MED31_HUMAN	MED31	Mediator of RNA polymerase II transcription subunit 31		20.7634	21.8764	21.4067	17.3001	21.5404	21.7715	1.14485	0.314424
Q86U02	CN165_HUMAN	LINC00596	Putative uncharacterized protein encoded by LINC00596		17.2276	18.8921	18.6813	16.6744	17.3235	17.3809	1.14071	0.935392
P69905	HBA_HUMAN	HBA2	Hemoglobin subunit alpha		29.2759	28.7708	29.3515	28.7927	27.2625	27.9372	1.13528	1.11502
A0A0B4J2F2	SIK1B_HUMAN	SIK1B	Putative serine/threonine-protein kinase SIK1B		22.4551	22.3831	22.5451	21.0886	21.5117	21.3857	1.13242	2.97027
Q9H0H5	RGAP1_HUMAN	RACGAP1	Rac GTPase-activating protein 1		22.4726	20.5261	20.7715	22.4451	18.5556	19.3782	1.13047	0.352653
Q8NEM8	CBPC3_HUMAN	AGBL3	Cytosolic carboxypeptidase 3		23.5754	24.5638	23.848	24.5812	19.3477	24.6703	1.12935	0.25096
Q9BXU7	UBP26_HUMAN	USP26	Ubiquitin carboxyl-terminal hydrolase 26		21.1206	21.8764	23.5045	23.867	19.5462	19.7317	1.11885	0.286552
F2Z3M2	CQ112_HUMAN	LINC02876	Uncharacterized protein encoded by LINC02876		20.3857	21.8614	21.654	19.8477	19.0615	21.6364	1.11849	0.556721
Q9UHY1	NRBP_HUMAN	NRBP1	Nuclear receptor-binding protein		27.0084	26.8264	26.9428	25.5463	26.2408	25.6513	1.11306	2.12556
Q9HCJ3	RAVR2_HUMAN	RAVER2	Ribonucleoprotein PTB-binding 2		21.1332	21.1015	20.5356	19.6582	21.0493	18.7277	1.11174	0.724898
Q9C0D9	EPT1_HUMAN	SELENOI	Ethanolaminephosphotransferase 1		21.8269	21.5869	21.7675	21.1269	19.3156	21.4067	1.1107	0.776351
Q12950	FOXD4_HUMAN	FOXD4	Forkhead box protein D4		17.7802	18.9918	19.1303	18.0039	16.962	17.645	1.09714	0.976408
Q92738	US6NL_HUMAN	USP6NL	USP6 N-terminal-like protein		20.9742	21.2243	17.6357	16.102	19.0653	21.3805	1.09547	0.223215
O00622	CCN1_HUMAN	CCN1	CCN family member 1		27.9595	27.8858	27.9539	26.8974	26.5754	27.0609	1.08852	2.77849
P32418	NAC1_HUMAN	SLC8A1	Sodium/calcium exchanger 1		22.002	21.9672	21.9916	18.455	22.2036	22.0559	1.0821	0.36938
Q9NWU2	GID8_HUMAN	GID8	Glucose-induced degradation protein 8 homolog		23.8093	23.6971	23.8191	22.9152	22.4972	22.6714	1.08056	2.97491
Q96MU5	CQ077_HUMAN	CD300LD-AS1	Uncharacterized protein CD300LD-AS1		20.3538	20.3645	20.3962	19.8948	18.5105	19.4741	1.07839	1.23547
Q2YD98	UVSSA_HUMAN	UVSSA	UV-stimulated scaffold protein A		21.9024	20.5356	19.473	22.2593	16.6967	19.7233	1.07723	0.242219
Q96AH0	SOSB2_HUMAN	NABP1	SOSS complex subunit B2		22.6779	22.8132	22.6475	22.1886	20.6628	22.0592	1.07598	1.02877
Q8IY51	TIGD4_HUMAN	TIGD4	Tigger transposable element-derived protein 4		21.9847	20.6886	20.343	19.7783	19.8757	20.1457	1.07221	0.982288
Q9NYL2	M3K20_HUMAN	MAP3K20	Mitogen-activated protein kinase kinase kinase 20		26.8264	27.189	23.9043	24.002	23.6757	27.0296	1.07077	0.29056
Q9C0H5	RHG39_HUMAN	ARHGAP39	Rho GTPase-activating protein 39		21.3592	22.6865	16.3927	19.7119	16.3267	21.1946	1.06839	0.168244
Q8NHR9	PROF4_HUMAN	PFN4	Profilin-4		20.5615	16.02	16.0664	16.3304	16.349	16.7752	1.06444	0.283529
Q9H6Y7	RN167_HUMAN	RNF167	E3 ubiquitin-protein ligase RNF167		22.4726	22.6006	21.4425	22.6298	18.7145	22.002	1.0565	0.34519
Q04756	HGFA_HUMAN	HGFAC	Hepatocyte growth factor activator		23.7695	23.391	23.5045	22.9654	22.2066	22.3294	1.05453	1.80942
Q96MT1	RN145_HUMAN	RNF145	RING finger protein 145		17.5449	18.1218	19.4131	17.3363	17.4089	17.1714	1.05438	0.882176
Q9P2X7	DEC1_HUMAN	DELEC1	Deleted in esophageal cancer 1		21.8113	20.8576	20.6971	19.7633	19.6802	20.7634	1.05302	1.00409
Q8NGC2	OR4E2_HUMAN	OR4E2	Olfactory receptor 4E2		23.1472	23.2273	21.8651	23.2463	18.3699	23.4676	1.05197	0.241021
P14921	ETS1_HUMAN	ETS1	Protein C-ets-1		22.9261	22.8404	22.8727	21.9882	21.7553	21.743	1.0509	3.63806
Q15173	2A5B_HUMAN	PPP2R5B	Serine/threonine-protein phosphatase 2A 56 kDa regulatory subunit beta isoform		21.6671	22.2036	22.4775	18.4287	22.4576	22.3129	1.04969	0.321066
O43325	LYRM1_HUMAN	LYRM1	LYR motif-containing protein 1		22.2302	22.5237	22.2764	22.6431	22.1426	19.1086	1.04537	0.399186
O43187	IRAK2_HUMAN	IRAK2	Interleukin-1 receptor-associated kinase-like 2		23.867	23.2961	23.6431	20.6186	22.7056	24.3511	1.04364	0.404944
Q86VQ0	LCA5_HUMAN	LCA5	Lebercilin		23.5522	21.0951	20.558	18.3225	21.9495	21.8113	1.04063	0.278457
P04114	APOB_HUMAN	APOB	Apolipoprotein B-100		25.1015	24.2463	24.3307	24.019	23.3645	23.2036	1.03045	1.30794
Q9Y3Y4	PYGO1_HUMAN	PYGO1	Pygopus homolog 1		19.0692	19.5947	18.9697	18.1351	17.8367	18.599	1.02089	1.59033
Q8N371	KDM8_HUMAN	KDM8	Bifunctional peptidase and arginyl-hydroxylase JMJD5		19.5466	17.7179	18.0038	16.9335	17.7939	17.4856	1.01838	0.753298
P02790	HEMO_HUMAN	HPX	Hemopexin		23.6865	23.632	23.48	22.7935	22.4324	22.5285	1.01469	2.91008
Q53G59	KLH12_HUMAN	KLHL12	Kelch-like protein 12		22.8269	22.6074	22.4775	22.7286	22.5093	19.6304	1.0145	0.432775
Q86W26	NAL10_HUMAN	NLRP10	NACHT, LRR and PYD domains-containing protein 10		19.3355	23.2821	21.502	21.5823	18.6551	20.8423	1.01329	0.283574
P0CH98;Q4KMX7	F106A_HUMAN;F106C_HUMAN	FAM106A;FAM106C	Protein FAM106C		19.0971	16.6488	16.7578	16.0674	16.8601	16.5379	1.01273	0.537663
Q9H8X2	IPPK_HUMAN	IPPK	Inositol-pentakisphosphate 2-kinase		21.0951	20.9171	20.9316	21.4425	17.3726	21.1015	1.00904	0.316516
O15033	AREL1_HUMAN	AREL1	Apoptosis-resistant E3 ubiquitin protein ligase 1		22.0983	22.1301	21.8764	19.8667	21.4221	21.7995	1.00548	0.776427
Q9Y577	TRI17_HUMAN	TRIM17	E3 ubiquitin-protein ligase TRIM17		22.0156	21.2419	21.0821	20.895	18.727	21.7836	0.978019	0.44067
P05412	JUN_HUMAN	JUN	Transcription factor Jun		23.8288	24.3376	24.239	23.4298	22.9742	23.0756	0.97524	2.02614
Q93083	MT1L_HUMAN	MT1L	Metallothionein-1L		21.6141	21.1519	21.3592	20.7307	20.3211	20.1704	0.96769	1.97141
Q96KQ4	ASPP1_HUMAN	PPP1R13B	Apoptosis-stimulating of p53 protein 1		24.141	22.4196	25.9606	19.6237	24.1253	25.8788	0.964447	0.171689
A8MTT3	CEBOS_HUMAN	CEBPZOS	Protein CEBPZOS		22.6562	22.4526	22.4375	22.6693	22.3156	19.6883	0.957705	0.435077
P23610	HAP40_HUMAN	F8A3	40-kDa huntingtin-associated protein		22.5069	22.4874	23.5869	22.2185	21.2933	22.2096	0.953282	0.937314
Q8N0V1	ZNAS1_HUMAN	ZNF295-AS1	Putative uncharacterized protein ZNF295-AS1		20.1825	19.4716	20.1457	19.0141	19.0034	18.9447	0.945871	1.81954
P02461	CO3A1_HUMAN	COL3A1	Collagen alpha-1(III) chain		25.8623	26.0995	25.989	24.8044	25.2785	25.0401	0.9426	2.4524
Q14957	NMDE3_HUMAN	GRIN2C	Glutamate receptor ionotropic, NMDA 2C		23.3511	21.7182	21.9707	21.2764	21.265	21.6714	0.94239	0.832803
Q9NX01	TXN4B_HUMAN	TXNL4B	Thioredoxin-like protein 4B		21.7182	21.743	21.8839	21.9812	21.7915	18.7474	0.941673	0.376629
Q5TAB7	RIPP2_HUMAN	RIPPLY2	Protein ripply2		17.6745	17.7822	19.9352	17.5526	17.4645	17.5529	0.940591	0.567268
Q9Y4F3	MARF1_HUMAN	MARF1	Meiosis regulator and mRNA stability factor 1		21.8764	21.8614	21.9171	21.8191	19.3872	21.6364	0.937384	0.527409
Q9NX94	WBP1L_HUMAN	WBP1L	WW domain binding protein 1-like		19.6107	19.4747	19.6502	18.6586	18.625	18.6574	0.931548	4.16956
O14613	BORG1_HUMAN	CDC42EP2	Cdc42 effector protein 2		20.7715	20.654	21.0886	19.6951	20.6628	19.3679	0.929495	1.0659
Q9P0S9	TM14C_HUMAN	TMEM14C	Transmembrane protein 14C		24.4862	24.6264	24.48	23.632	23.211	23.9672	0.927458	1.84305
Q86XR8	CEP57_HUMAN	CEP57	Centrosomal protein of 57 kDa		21.4923	23.0951	20.6096	18.9007	19.2143	24.3031	0.926296	0.186598
Q9Y287	ITM2B_HUMAN	ITM2B	Integral membrane protein 2B		25.141	25.3645	25.4234	24.1015	24.5522	24.4984	0.925646	2.29395
P13056	NR2C1_HUMAN	NR2C1	Nuclear receptor subfamily 2 group C member 1		20.5638	19.9117	20.3752	20.1457	19.2073	18.7365	0.920413	0.941472
Q8WUJ3	CEMIP_HUMAN	CEMIP	Cell migration-inducing and hyaluronan-binding protein		25.1604	24.7796	25.2207	25.0935	23.4676	23.848	0.917165	0.834059
Q9NWQ8	PHAG1_HUMAN	PAG1	Phosphoprotein associated with glycosphingolipid-enriched microdomains 1		21.1765	20.9024	19.9316	20.2185	19.9882	19.0583	0.915197	0.818007
Q9UJW8	ZN180_HUMAN	ZNF180	Zinc finger protein 180		17.3197	17.0535	18.4103	16.4732	16.9269	16.6444	0.912984	0.982312
Q9BW66	CINP_HUMAN	CINP	Cyclin-dependent kinase 2-interacting protein		23.976	23.8576	23.848	24.141	23.632	21.1765	0.910697	0.424277
A9UHW6	MI4GD_HUMAN	MIF4GD	MIF4G domain-containing protein		25.9912	26.0588	25.976	26.0975	25.7796	23.417	0.910631	0.465613
Q15583	TGIF1_HUMAN	TGIF1	Homeobox protein TGIF1		22.3645	22.3752	22.3884	21.7955	21.1079	21.4972	0.909171	1.98692
Q9BT67	NFIP1_HUMAN	NDFIP1	NEDD4 family-interacting protein 1		21.5823	21.2302	21.3857	19.2254	21.8538	20.3962	0.907642	0.519684
Q9UM11	FZR1_HUMAN	FZR1	Fizzy-related protein homolog		22.2125	22.4947	22.0526	21.6141	22.2273	20.2066	0.903942	0.670181
Q8N8Q9	NIPA2_HUMAN	NIPA2	Magnesium transporter NIPA2		20.8113	20.0691	19.9601	20.343	18.4199	19.368	0.903227	0.664352
Q96SI9	STRBP_HUMAN	STRBP	Spermatid perinuclear RNA-binding protein		27.5682	22.4825	27.4154	27.5014	19.8716	27.4073	0.895245	0.10661
Q96GD4	AURKB_HUMAN	AURKB	Aurora kinase B		21.6971	23.0342	20.7634	23.2961	19.7777	19.7353	0.895207	0.264451
Q8IV32	CCD71_HUMAN	CCDC71	Coiled-coil domain-containing protein 71		27.8142	27.8445	27.8623	27.8974	27.2445	25.6998	0.89314	0.615417
P16035	TIMP2_HUMAN	TIMP2	Metalloproteinase inhibitor 2		24.5463	24.4738	24.4984	23.5522	23.5285	23.7895	0.882761	3.29372
Q9BWU1	CDK19_HUMAN	CDK19	Cyclin-dependent kinase 19		22.1395	20.0156	21.2535	19.9181	20.5823	20.2989	0.869748	0.603858
Q9NWS9	ZN446_HUMAN	ZNF446	Zinc finger protein 446		22.3672	20.5261	20.3538	19.9601	20.3211	20.3752	0.863556	0.586291
Q9H967	WDR76_HUMAN	WDR76	WD repeat-containing protein 76		22.1332	21.2125	20.5915	22.8385	18.9035	19.6101	0.861707	0.266721
Q96AW1	VOPP1_HUMAN	VOPP1	WW domain binding protein VOPP1		19.3306	19.635	19.4547	18.4717	18.7333	18.649	0.855452	2.72652
Q92766	RREB1_HUMAN	RREB1	Ras-responsive element-binding protein 1		19.0129	20.3262	19.2606	17.9972	19.059	18.9793	0.854776	0.742705
Q8N386	LRC25_HUMAN	LRRC25	Leucine-rich repeat-containing protein 25		19.4811	19.1382	19.247	18.4095	18.5562	18.3369	0.854591	2.68765
Q6ECI4	ZN470_HUMAN	ZNF470	Zinc finger protein 470		19.4678	21.1581	21.1079	20.953	20.3993	17.8283	0.851027	0.312927
P38936	CDN1A_HUMAN	CDKN1A	Cyclin-dependent kinase inhibitor 1		25.0567	24.8044	24.9088	24.2679	23.9316	24.019	0.850506	2.61924
Q15011	HERP1_HUMAN	HERPUD1	Homocysteine-responsive endoplasmic reticulum-resident ubiquitin-like domain member 1 protein		22.6231	22.5522	22.6431	21.7056	21.7307	21.8307	0.850452	4.25543
Q9HCC9	LST2_HUMAN	ZFYVE28	Lateral signaling target protein 2 homolog		21.4526	20.7223	20.5638	19.1781	20.7223	20.2877	0.850203	0.727563
Q9H992	MARH7_HUMAN	MARCHF7	E3 ubiquitin-protein ligase MARCHF7		19.4348	19.1725	19.0716	18.8054	17.7967	18.5263	0.850178	1.24885
Q8IZR5	CKLF4_HUMAN	CMTM4	CKLF-like MARVEL transmembrane domain-containing protein 4		20.7715	21.2185	20.9316	18.1108	21.0756	21.1886	0.848843	0.346328
Q9Y6I8	PXMP4_HUMAN	PXMP4	Peroxisomal membrane protein 4		20.5823	20.5823	20.4476	19.9863	20.2401	18.84	0.848588	0.915098
Q8NG83	OR2M3_HUMAN	OR2M3	Olfactory receptor 2M3		21.1457	21.5356	22.0918	19.926	21.2006	21.1079	0.846212	0.791435
Q8TF08	CX7B2_HUMAN	COX7B2	Cytochrome c oxidase subunit 7B2, mitochondrial		18.8304	21.213	19.8649	19.0781	19.3414	18.9549	0.844571	0.532276
P36894	BMR1A_HUMAN	BMPR1A	Bone morphogenetic protein receptor type-1A		20.4273	20.0821	20.0426	20.2764	17.945	19.7994	0.84373	0.512629
Q9UBC2	EP15R_HUMAN	EPS15L1	Epidermal growth factor receptor substrate 15-like 1		27.0711	26.6595	26.8264	25.1757	27.2445	25.6096	0.842402	0.586484
Q9BQT9	CSTN3_HUMAN	CLSTN3	Calsyntenin-3		20.0426	20.1079	19.9882	18.9936	19.6322	18.9949	0.839314	1.75428
Q9Y2J4	AMOL2_HUMAN	AMOTL2	Angiomotin-like protein 2		22.6253	22.654	22.6029	21.9423	21.7389	21.7013	0.833206	3.39836
P42684	ABL2_HUMAN	ABL2	Tyrosine-protein kinase ABL2		22.5069	22.4898	22.5069	21.7348	21.6096	21.6628	0.832137	4.64913
O95445	APOM_HUMAN	APOM	Apolipoprotein M		22.821	22.0592	22.5522	22.2185	21.2006	21.5777	0.811872	1.02601
P02675	FIBB_HUMAN	FGB	Fibrinogen beta chain		23.0756	22.9584	23.5638	22.502	22.3376	22.3266	0.810532	1.85659
Q13772	NCOA4_HUMAN	NCOA4	Nuclear receptor coactivator 4		22.6779	22.8633	23.0054	21.8152	22.1363	22.1673	0.809233	2.27296
O43291	SPIT2_HUMAN	SPINT2	Kunitz-type protease inhibitor 2		19.9882	19.4685	19.5515	19.7812	17.9745	18.8294	0.807624	0.671065
P08123	CO1A2_HUMAN	COL1A2	Collagen alpha-2(I) chain		21.7553	21.7182	21.7471	20.6971	21.1079	20.9951	0.806854	2.5532
Q9H9L4	KANL2_HUMAN	KANSL2	KAT8 regulatory NSL complex subunit 2		20.4273	20.7223	20.265	20.0559	20.2139	18.7283	0.805516	0.756096
Q8IYQ7	THNS1_HUMAN	THNSL1	Threonine synthase-like 1		23.0241	23.8093	23.9672	23.7594	22.5045	22.1238	0.804337	0.63154
Q9UI30	TR112_HUMAN	TRMT112	Multifunctional methyltransferase subunit TRM112-like protein		26.1155	25.8599	26.0955	25.3545	25.217	25.0975	0.800645	2.71314
P41594	GRM5_HUMAN	GRM5	Metabotropic glutamate receptor 5		20.2535	20.8113	21.0493	19.3042	20.5731	19.844	0.797578	0.848054
Q16649	NFIL3_HUMAN	NFIL3	Nuclear factor interleukin-3-regulated protein		20.5261	20.265	20.5069	22.343	18.0923	18.4715	0.797056	0.229524
P09016	HXD4_HUMAN	HOXD4	Homeobox protein Hox-D4		20.6101	18.3734	18.6398	18.4664	18.271	18.5012	0.794889	0.488135
Q8N370	LAT4_HUMAN	SLC43A2	Large neutral amino acids transporter small subunit 4		19.0851	19.4616	19.3207	18.4525	18.6306	18.401	0.794437	2.44007
Q06481	APLP2_HUMAN	APLP2	Amyloid beta precursor like protein 2		24.9628	24.7895	24.848	24.0609	24.1015	24.0609	0.792395	3.94459
Q0VDI3	TM267_HUMAN	TMEM267	Transmembrane protein 267		19.6031	18.7645	18.6129	18.1198	18.1022	18.3839	0.791492	1.15895
Q8IY31	IFT20_HUMAN	IFT20	Intraflagellar transport protein 20 homolog		22.4923	22.8307	22.6693	21.928	21.5165	22.1734	0.791462	1.67328
O75934	SPF27_HUMAN	BCAS2	Pre-mRNA-splicing factor SPF27		26.6998	24.5754	24.5285	24.5463	24.3975	24.4862	0.791234	0.478952
P00734	THRB_HUMAN	F2	Prothrombin		22.9006	22.6992	23.2535	22.1734	22.0258	22.2849	0.789732	1.94015
P0CG32	ZCC18_HUMAN	ZCCHC18	Zinc finger CCHC domain-containing protein 18		22.0789	20.4676	22.1143	21.1269	20.8113	20.3538	0.789588	0.6017
P68871	HBB_HUMAN	HBB	Hemoglobin subunit beta		25.2856	24.8811	25.5983	24.7024	24.1871	24.5165	0.786343	1.42642
A0A0C4DH67	KV108_HUMAN	IGKV1-8	Immunoglobulin kappa variable 1-8		21.2243	19.8456	19.8784	18.8658	20.9601	18.7647	0.785896	0.391184
Q9Y264	ANGP4_HUMAN	ANGPT4	Angiopoietin-4		18.8134	18.2509	18.0747	17.2821	17.6246	17.896	0.77877	1.28186
Q8NA77	TEX19_HUMAN	TEX19	Testis-expressed protein 19		19.4882	19.255	19.8645	18.8617	18.7104	18.7096	0.775356	1.86322
Q8WUT4	LRRN4_HUMAN	LRRN4	Leucine-rich repeat neuronal protein 4		19.2576	19.6428	20.545	19.0751	18.9721	19.0734	0.774955	0.94662
O95025	SEM3D_HUMAN	SEMA3D	Semaphorin-3D		21.4576	20.3321	21.7223	20.0156	20.1704	21.002	0.774713	0.669685
Q96H12	MSD3_HUMAN	MSANTD3	Myb/SANT-like DNA-binding domain-containing protein 3		21.8034	21.7098	21.7634	21.3045	20.6323	21.0292	0.770203	1.75965
Q9H3R2	MUC13_HUMAN	MUC13	Mucin-13		19.7473	19.5181	19.9246	19.0086	18.8683	19.0051	0.769356	2.43347
Q9NV92	NFIP2_HUMAN	NDFIP2	NEDD4 family-interacting protein 2		21.3592	21.1457	21.3045	20.68	20.2535	20.5823	0.76451	2.21794
Q99471	PFD5_HUMAN	PFDN5	Prefoldin subunit 5		24.4362	24.5812	24.8623	24.0854	23.6757	23.8288	0.763255	1.93619
P10124	SRGN_HUMAN	SRGN	Serglycin		23.3239	23.0821	23.0691	22.5093	22.3184	22.3619	0.761851	2.78124
Q9NP95	FGF20_HUMAN	FGF20	Fibroblast growth factor 20		19.6011	19.4482	21.4676	19.9058	18.3163	20.0292	0.755213	0.371207
Q9H2K8	TAOK3_HUMAN	TAOK3	Serine/threonine-protein kinase TAO3		23.5285	22.7244	24.1174	22.6843	22.8307	22.5915	0.754603	0.85608
Q8WVV4	POF1B_HUMAN	POF1B	Protein POF1B		19.9882	20.3101	19.2139	18.8611	18.9745	19.4206	0.752008	0.958281
Q16626	MEA1_HUMAN	MEA1	Male-enhanced antigen 1		21.3101	20.8651	21.1642	21.2535	18.6349	21.2006	0.750135	0.357394
Q8NHM5	KDM2B_HUMAN	KDM2B	Lysine-specific demethylase 2B		25.0894	20.6276	25.5165	25.1604	24.6918	19.1342	0.749044	0.10882
Q96FJ2	DYL2_HUMAN	DYNLL2	Dynein light chain 2, cytoplasmic		28.3951	28.5609	28.49	27.632	27.604	27.9705	0.746506	2.37582
Q8TAP6	CEP76_HUMAN	CEP76	Centrosomal protein of 76 kDa		22.7389	21.7013	23.2006	22.8288	23.2066	19.3688	0.745557	0.224189
A6NK89	RASFA_HUMAN	RASSF10	Ras association domain-containing protein 10		19.3395	19.0917	17.6069	17.3666	18.2102	18.2266	0.744892	0.537974
Q96C24	SYTL4_HUMAN	SYTL4	Synaptotagmin-like protein 4		22.8152	22.9207	22.8876	23.2448	22.8152	20.3295	0.744665	0.338417
Q96JC4	ZN479_HUMAN	ZNF479	Zinc finger protein 479		20.4375	20.6096	20.5165	19.6607	20.6714	18.9999	0.743851	0.693487
O60513	B4GT4_HUMAN	B4GALT4	Beta-1,4-galactosyltransferase 4		20.7307	21.0224	20.4375	18.8233	20.4273	20.7223	0.739223	0.530488
Q8IYK4	GT252_HUMAN	COLGALT2	Procollagen galactosyltransferase 2		22.2764	22.7077	22.695	20.0368	22.6186	22.8073	0.738773	0.337154
O95707	RPP29_HUMAN	POP4	Ribonuclease P protein subunit p29		24.6649	25.9066	24.4362	23.9043	24.3511	24.5404	0.737308	0.677801
Q8WXR4	MYO3B_HUMAN	MYO3B	Myosin-IIIb		22.4349	23.8858	18.3426	19.7537	19.0028	23.6971	0.736565	0.121818
Q8NFT8	DNER_HUMAN	DNER	Delta and Notch-like epidermal growth factor-related receptor		24.2463	23.9316	23.9495	23.417	23.2821	23.2332	0.731702	2.49209
Q9UBU8	MO4L1_HUMAN	MORF4L1	Mortality factor 4-like protein 1		24.6811	26.1604	25.8069	24.7846	24.5165	25.1565	0.730239	0.687922
Q9UHI8	ATS1_HUMAN	ADAMTS1	A disintegrin and metalloproteinase with thrombospondin motifs 1		22.7512	22.2302	22.5823	22.0983	21.4526	21.823	0.729968	1.4058
Q14596	NBR1_HUMAN	NBR1	Next to BRCA1 gene 1 protein		22.417	22.1079	22.1795	21.6231	21.4324	21.4825	0.722147	2.56279
O43826	G6PT1_HUMAN	SLC37A4	Glucose-6-phosphate exchanger SLC37A4		22.3857	22.3619	24.3578	22.265	22.2961	22.3936	0.716893	0.468404
P58004	SESN2_HUMAN	SESN2	Sestrin-2		19.9099	19.3435	19.4851	19.0658	19.0167	18.5122	0.71456	1.36014
Q01581	HMCS1_HUMAN	HMGCS1	Hydroxymethylglutaryl-CoA synthase, cytoplasmic		25.3545	24.7441	24.7182	24.7389	23.9847	23.9495	0.714537	1.01327
Q8WV44	TRI41_HUMAN	TRIM41	E3 ubiquitin-protein ligase TRIM41		20.654	20.8802	20.8876	20.6628	20.9098	18.7184	0.710294	0.436636
O60563	CCNT1_HUMAN	CCNT1	Cyclin-T1		24.7945	22.5638	23.0426	22.4923	23.1642	22.6253	0.706369	0.425786
P25021	HRH2_HUMAN	HRH2	Histamine H2 receptor		21.4273	21.4375	21.5685	21.4118	21.4273	19.4772	0.705634	0.470971
Q9C0C4	SEM4C_HUMAN	SEMA4C	Semaphorin-4C		22.9406	21.6186	21.8073	21.9707	21.7098	20.5731	0.704312	0.519515
Q9C0D4	Z518B_HUMAN	ZNF518B	Zinc finger protein 518B		18.5993	22.9899	18.5433	19.3401	19.2655	19.4151	0.703956	0.181915
Q9Y2S2	CRYL1_HUMAN	CRYL1	Lambda-crystallin homolog		27.2445	20.6714	19.9316	19.9459	22.5915	23.2066	0.701148	0.099398
Q9UH90	FBX40_HUMAN	FBXO40	F-box only protein 40		23.1348	23.2679	23.2535	22.8423	21.2989	23.417	0.699294	0.479141
Q9C0I3	CCSE1_HUMAN	CCSER1	Serine-rich coiled-coil domain-containing protein 1		22.1946	22.3266	22.2933	22.2849	22.0325	20.4081	0.696356	0.51874
P00750	TPA_HUMAN	PLAT	Tissue-type plasminogen activator		26.3444	27.5826	27.0296	26.0547	26.3324	26.4877	0.693926	0.848426
Q96HA4	CA159_HUMAN	C1orf159	Uncharacterized protein C1orf159		20.8034	20.7389	20.5451	20.5731	20.6006	18.8598	0.684652	0.51724
P52815	RM12_HUMAN	MRPL12	Large ribosomal subunit protein bL12m		26.1927	26.1174	26.1234	25.5638	25.391	25.4362	0.680833	3.54706
Q9NQG7	HPS4_HUMAN	HPS4	BLOC-3 complex member HPS4		20.0559	19.797	19.7032	20.3752	19.9601	17.1828	0.679307	0.269883
P15408	FOSL2_HUMAN	FOSL2	Fos-related antigen 2		23.5404	23.5754	23.6431	22.9388	22.8404	22.9459	0.677931	3.92857
Q9NX08	COMD8_HUMAN	COMMD8	COMM domain-containing protein 8		23.9847	23.9672	24.1488	23.654	23.0999	23.3239	0.674287	1.77157
Q9H9V9	JMJD4_HUMAN	JMJD4	2-oxoglutarate and iron-dependent oxygenase JMJD4		17.17	17.2257	19.0712	17.3424	17.0636	17.0417	0.673064	0.459682
Q9ULL5	PRR12_HUMAN	PRR12	Proline-rich protein 12		21.265	20.5165	20.3101	19.8645	20.0426	20.1825	0.667339	1.02964
P09848	LPH_HUMAN	LCT	Lactase/phlorizin hydrolase		19.5242	19.8176	18.1329	18.7081	18.277	18.4925	0.665668	0.551576
Q6P5X7	TMM71_HUMAN	TMEM71	Transmembrane protein 71		20.5451	20.5823	20.5261	19.6292	20.6364	19.3957	0.664081	0.805967
Q9UGC7	RF1ML_HUMAN	MTRF1L	Peptide chain release factor 1-like, mitochondrial		19.928	19.6944	20.3211	20.265	17.7915	19.8987	0.662747	0.346931
Q9BT88	SYT11_HUMAN	SYT11	Synaptotagmin-11		22.9566	22.5522	22.4849	22.1079	21.953	21.9459	0.662272	1.87454
Q02535	ID3_HUMAN	ID3	DNA-binding protein inhibitor ID-3		20.417	20.6006	20.9024	20.1825	19.7525	20.002	0.661006	1.60582
O60239	3BP5_HUMAN	SH3BP5	SH3 domain-binding protein 5		21.4726	19.7974	19.8657	20.1206	19.9601	19.0725	0.660812	0.445894
Q7Z3D4	LYSM3_HUMAN	LYSMD3	LysM and putative peptidoglycan-binding domain-containing protein 3		19.5301	19.4961	20.0156	19.6124	17.9154	19.5381	0.658649	0.496891
Q53ET0	CRTC2_HUMAN	CRTC2	CREB-regulated transcription coactivator 2		21.6276	21.7307	21.8614	21.953	19.6188	21.6757	0.65732	0.372437
P53420	CO4A4_HUMAN	COL4A4	Collagen alpha-4(IV) chain		20.5212	19.0887	18.8692	18.4752	18.9699	19.065	0.656291	0.525528
O00458	IFRD1_HUMAN	IFRD1	Interferon-related developmental regulator 1		19.5486	19.4623	19.7262	18.9888	18.6723	19.1205	0.651849	1.87456
Q9BXB1	LGR4_HUMAN	LGR4	Leucine-rich repeat-containing G-protein coupled receptor 4		20.5356	20.8034	20.3752	19.7905	19.5355	20.4375	0.650244	1.0313
Q6V1X1	DPP8_HUMAN	DPP8	Dipeptidyl peptidase 8		23.3778	22.9933	21.0886	23.2961	21.0493	21.1642	0.65005	0.253731
P55103	INHBC_HUMAN	INHBC	Inhibin beta C chain		19.543	19.6362	19.7706	19.5475	17.7772	19.6836	0.647182	0.451212
P02679	FIBG_HUMAN	FGG	Fibrinogen gamma chain		21.9601	22.0592	22.3988	21.5869	21.2764	21.6141	0.64691	1.70915
Q13541	4EBP1_HUMAN	EIF4EBP1	Eukaryotic translation initiation factor 4E-binding protein 1		20.4576	20.8113	20.9098	20.002	20.1079	20.1332	0.645208	1.96927
Q9NP84	TNR12_HUMAN	TNFRSF12A	Tumor necrosis factor receptor superfamily member 12A		24.4984	24.4425	24.4862	23.895	23.7492	23.848	0.644931	3.81591
P32456	GBP2_HUMAN	GBP2	Guanylate-binding protein 2		20.5069	21.1946	21.3266	18.7724	21.2006	21.1206	0.644834	0.31558
P60371;P60409	KR106_HUMAN;KR107_HUMAN	KRTAP10-6;KRTAP10-7	Keratin-associated protein 10-6		20.4476	20.002	19.9316	20.1581	18.6045	19.6907	0.642585	0.588295
O60812	HNRC1_HUMAN	HNRNPCL1	Heterogeneous nuclear ribonucleoprotein C-like 1		20.9243	21.1206	21.002	21.1015	21.1206	18.8986	0.642078	0.362144
P17676	CEBPB_HUMAN	CEBPB	CCAAT/enhancer-binding protein beta		23.7077	23.5404	23.5983	22.9725	23.0658	22.8839	0.641408	3.06003
P05067	A4_HUMAN	APP	Amyloid-beta precursor protein		24.8044	24.6811	24.7543	24.019	24.1095	24.1871	0.641404	3.35354
Q9NSA3	CNBP1_HUMAN	CTNNBIP1	Beta-catenin-interacting protein 1		18.7207	17.297	18.3731	17.3998	17.5182	17.5503	0.640858	0.67529
Q9P2J5	SYLC_HUMAN	LARS1	Leucine--tRNA ligase, cytoplasmic		27.632	26.17	26.8142	26.1642	26.2944	26.2426	0.638313	0.683405
Q15063	POSTN_HUMAN	POSTN	Periostin		21.6364	21.4526	21.9812	20.7955	20.8346	21.5261	0.638009	1.05793
Q9UF56	FXL17_HUMAN	FBXL17	F-box/LRR-repeat protein 17		21.3376	20.895	21.4923	20.2066	20.8423	20.7715	0.634827	1.10878
Q9P2J9	PDP2_HUMAN	PDP2	[Pyruvate dehydrogenase [acetyl-transferring]]-phosphatase 2, mitochondrial		21.2764	19.3516	19.0343	18.0796	19.1679	20.5165	0.632753	0.252667
Q5T440	CAF17_HUMAN	IBA57	Putative transferase CAF17, mitochondrial		21.6051	21.8423	22.882	22.6865	21.4324	20.3211	0.629833	0.329038
Q96RG2	PASK_HUMAN	PASK	PAS domain-containing serine/threonine-protein kinase		19.3717	18.9703	19.527	18.9966	18.7478	18.2415	0.627675	1.06397
Q9P1Z2	CACO1_HUMAN	CALCOCO1	Calcium-binding and coiled-coil domain-containing protein 1		24.3578	24.3511	24.3101	23.6971	23.6209	23.8191	0.627318	3.33576
Q08629	TICN1_HUMAN	SPOCK1	Testican-1		23.5522	23.7895	23.867	22.8913	23.181	23.2679	0.622843	1.86551
P04004	VTNC_HUMAN	VTN	Vitronectin		26.7129	26.239	26.673	25.8167	25.7466	26.1946	0.622357	1.40831
Q5D1E8	ZC12A_HUMAN	ZC3H12A	Endoribonuclease ZC3H12A		21.2302	21.5165	21.6364	20.6628	20.9742	20.8876	0.619536	1.81863
P98174	FGD1_HUMAN	FGD1	FYVE, RhoGEF and PH domain-containing protein 1		21.0559	21.0691	21.0951	20.9171	20.9882	19.473	0.613923	0.550336
Q9Y4E1	WAC2C_HUMAN	WASHC2C	WASH complex subunit 2C		21.7715	22.9098	23.1079	21.9951	21.7098	22.2448	0.613173	0.620626
Q9H3Z7	ABHGB_HUMAN	ABHD16B	Protein ABHD16B		21.4015	21.4273	17.1045	21.1206	17.5836	19.3904	0.612869	0.127505
Q6UDR6	SPIT4_HUMAN	SPINT4	Kunitz-type protease inhibitor 4		22.0393	21.7056	21.7098	21.6714	20.2658	21.68	0.612454	0.563186
P00488	F13A_HUMAN	F13A1	Coagulation factor XIII A chain		21.9601	21.9672	22.5356	21.3211	21.5638	21.7553	0.60756	1.24917
Q6NSI1	AR26L_HUMAN	ANKRD26P1	Putative ankyrin repeat domain-containing protein 26-like protein		19.118	19.2832	19.1337	19.2079	17.7388	18.7701	0.606023	0.621145
Q92698	RAD54_HUMAN	RAD54L	DNA repair and recombination protein RAD54-like		22.0691	21.5777	20.5915	20.7955	20.85	20.7796	0.604424	0.625254
Q9BXM7	PINK1_HUMAN	PINK1	Serine/threonine-protein kinase PINK1, mitochondrial		19.1605	19.2858	19.0842	19.5138	17.0011	19.2199	0.59853	0.306654
Q5VT06	CE350_HUMAN	CEP350	Centrosome-associated protein 350		21.8576	21.6453	21.0821	21.9601	21.7836	19.0506	0.596881	0.242956
Q9UNA4	POLI_HUMAN	POLI	DNA polymerase iota		22.4425	19.5361	21.5309	18.2871	21.714	21.7182	0.59675	0.156304
Q7Z698	SPRE2_HUMAN	SPRED2	Sprouty-related, EVH1 domain-containing protein 2		20.0156	19.9459	20.0691	19.1874	18.9326	20.1206	0.596675	0.755866
Q15528	MED22_HUMAN	MED22	Mediator of RNA polymerase II transcription subunit 22		19.9459	20.4067	19.8977	19.3373	18.8222	20.3101	0.59357	0.566692
Q16828	DUS6_HUMAN	DUSP6	Dual specificity protein phosphatase 6		20.0559	19.3063	19.4876	18.775	19.0102	19.2857	0.592967	1.03227
P17098	ZNF8_HUMAN	ZNF8	Zinc finger protein 8		19.0645	19.0764	19.2869	18.4412	18.2986	18.9349	0.584334	1.32847
Q96AD5	PLPL2_HUMAN	PNPLA2	Patatin-like phospholipase domain-containing protein 2		23.0258	23.1886	23.2229	22.4526	22.5869	22.6584	0.579774	2.60494
O75362	ZN217_HUMAN	ZNF217	Zinc finger protein 217		21.7182	21.6628	21.4825	21.2361	20.7955	21.1015	0.576768	1.74998
Q96CF2	CHM4C_HUMAN	CHMP4C	Charged multivesicular body protein 4c		20.7223	20.343	20.7553	20.3211	20.2185	19.5529	0.576052	0.982817
Q9BTU6	P4K2A_HUMAN	PI4K2A	Phosphatidylinositol 4-kinase type 2-alpha		27.8264	27.341	27.2979	27.509	27.341	25.8881	0.57573	0.458642
O95503	CBX6_HUMAN	CBX6	Chromobox protein homolog 6		22.9584	23.632	23.8858	22.4273	23.48	22.848	0.573609	0.625739
O14593	RFXK_HUMAN	RFXANK	DNA-binding protein RFXANK		20.5356	20.7715	20.5545	19.2839	20.4273	20.4375	0.571004	0.663023
Q8NC42	RN149_HUMAN	RNF149	E3 ubiquitin-protein ligase RNF149		21.2821	21.3538	21.6757	20.9882	20.9812	20.6364	0.568602	1.56024
O43255	SIAH2_HUMAN	SIAH2	E3 ubiquitin-protein ligase SIAH2		19.8862	20.0156	20.1825	19.9601	18.4115	20.0156	0.565706	0.45832
P62891	RL39_HUMAN	RPL39	Large ribosomal subunit protein eL39		28.3704	28.3367	28.3367	27.7895	27.726	27.8385	0.563263	4.08727
O43913	ORC5_HUMAN	ORC5	Origin recognition complex subunit 5		24.0609	23.9495	23.0805	23.211	23.2125	22.9777	0.56319	0.815889
Q96PV4	PNMA5_HUMAN	PNMA5	Paraneoplastic antigen-like protein 5		18.955	18.2924	18.3703	17.9336	18.057	17.9463	0.560213	1.23662
O75935	DCTN3_HUMAN	DCTN3	Dynactin subunit 3		25.8764	25.824	25.8288	25.3811	25.1908	25.2785	0.559566	3.20516
P10909	CLUS_HUMAN	CLU	Clusterin		20.3538	20.6628	20.4972	19.509	20.2185	20.1079	0.55945	1.10646
Q9HCK1	ZDBF2_HUMAN	ZDBF2	DBF4-type zinc finger-containing protein 2		24.5812	23.9134	24.391	24.8904	24.824	21.4972	0.558023	0.187444
Q9UBS3	DNJB9_HUMAN	DNAJB9	DnaJ homolog subfamily B member 9		19.9459	20.1946	20.3321	19.1951	19.7803	19.8345	0.554237	1.11467
Q9NZV1	CRIM1_HUMAN	CRIM1	Cysteine-rich motor neuron 1 protein		28.5609	28.2216	28.4274	27.9259	27.7195	27.9031	0.55381	2.02423
Q9NRW3	ABC3C_HUMAN	APOBEC3C	DNA dC->dU-editing enzyme APOBEC-3C		23.4676	23.417	23.5983	23.895	22.2066	22.7203	0.55369	0.478249
Q9P0N8	MARH2_HUMAN	MARCHF2	E3 ubiquitin-protein ligase MARCHF2		17.8071	19.3527	17.7127	17.6475	17.8216	17.7454	0.552694	0.444714
P35548	MSX2_HUMAN	MSX2	Homeobox protein MSX-2		21.0625	21.0493	21.1079	21.1395	19.3023	21.1206	0.552422	0.380883
Q96D09	GASP2_HUMAN	GPRASP2	G-protein coupled receptor-associated sorting protein 2		20.3538	20.8269	20.1581	20.2419	19.7776	19.6629	0.552106	0.972525
Q8WUM9	S20A1_HUMAN	SLC20A1	Sodium-dependent phosphate transporter 1		25.141	24.8433	24.9803	24.4738	24.3511	24.4862	0.551172	2.33704
Q14865	ARI5B_HUMAN	ARID5B	AT-rich interactive domain-containing protein 5B		23.3101	23.3239	23.2535	22.8858	22.6475	22.7056	0.549557	2.7359
P42772	CDN2B_HUMAN	CDKN2B	Cyclin-dependent kinase 4 inhibitor B		20.002	20.6971	20.9951	19.4888	20.1332	20.4273	0.548278	0.608267
P05090	APOD_HUMAN	APOD	Apolipoprotein D		20.4874	20.1946	20.1206	20.0821	19.9459	19.1324	0.547373	0.797998
Q9BXW9	FACD2_HUMAN	FANCD2	Fanconi anemia group D2 protein		21.7955	20.3211	19.696	21.8191	19.8834	18.4712	0.546291	0.18026
A0A5B9	TRBC2_HUMAN	TRBC2	T cell receptor beta constant 2		20.3278	19.2757	19.0792	19.0033	19.0255	19.0209	0.54436	0.632713
Q9BYV2	TRI54_HUMAN	TRIM54	Tripartite motif-containing protein 54		21.417	20.85	22.5333	22.9334	19.2266	21.0088	0.5438	0.174837
P55345	ANM2_HUMAN	PRMT2	Protein arginine N-methyltransferase 2		20.9742	19.7736	20.6714	19.1237	19.2628	21.4015	0.543741	0.264559
Q8ND90	PNMA1_HUMAN	PNMA1	Paraneoplastic antigen Ma1		23.0002	23.7796	23.867	23.8385	23.5869	21.5915	0.543321	0.287868
Q9UJP4	KLH21_HUMAN	KLHL21	Kelch-like protein 21		22.4375	21.7756	22.0493	21.7512	21.4375	21.4476	0.541999	1.16968
Q9UHN1	DPOG2_HUMAN	POLG2	DNA polymerase subunit gamma-2		19.9742	20.2989	19.9153	20.5567	17.9247	20.0821	0.541616	0.264088
Q9NR28	DBLOH_HUMAN	DIABLO	Diablo IAP-binding mitochondrial protein		25.452	25.4923	25.5551	25.1757	24.9672	24.7338	0.540903	1.83713
A6NIN4	RN227_HUMAN	RNF227	RING finger protein 227		19.9601	20.1946	18.6679	18.6807	18.9358	19.5899	0.538759	0.420201
Q96CG3	TIFA_HUMAN	TIFA	TRAF-interacting protein with FHA domain-containing protein A		25.1214	24.9672	24.8044	24.6918	24.4234	24.1642	0.537848	1.4101
Q8IZC6	CORA1_HUMAN	COL27A1	Collagen alpha-1(XXVII) chain		24.2463	23.7492	24.3975	22.7512	23.895	24.1332	0.53784	0.500699
P62273	RS29_HUMAN	RPS29	Small ribosomal subunit protein uS14		28.5128	28.4976	28.4938	28.1214	27.7771	27.9923	0.537829	2.22915
P27449	VATL_HUMAN	ATP6V0C	V-type proton ATPase 16 kDa proteolipid subunit c		25.4953	25.8288	25.8409	25.0567	25.0691	25.4266	0.537529	1.49913
Q16678	CP1B1_HUMAN	CYP1B1	Cytochrome P450 1B1		22.3511	22.7756	23.1627	21.8113	22.5117	22.3592	0.53573	0.78056
Q8IY45	AMN1_HUMAN	AMN1	Protein AMN1 homolog		19.8182	20.3211	20.265	19.6105	19.5859	19.6097	0.532763	1.54171
Q5T6V5	QNG1_HUMAN	QNG1	Queuosine 5'-phosphate N-glycosylase/hydrolase		21.4425	21.2933	21.7512	19.1677	21.8802	21.8423	0.532328	0.229749
O75446	SAP30_HUMAN	SAP30	Histone deacetylase complex subunit SAP30		22.3565	22.7013	22.9243	22.714	22.3511	21.3211	0.531983	0.520893
P42771	CDN2A_HUMAN	CDKN2A	Cyclin-dependent kinase inhibitor 2A		25.1015	25.3975	25.4892	24.8191	24.7234	24.8528	0.53099	1.90088
Q9HBY8	SGK2_HUMAN	SGK2	Serine/threonine-protein kinase Sgk2		18.2182	18.5773	19.4574	18.2961	18.2318	18.1391	0.528697	0.643614
Q86VP1	TAXB1_HUMAN	TAX1BP1	Tax1-binding protein 1		20.5451	20.4576	20.5545	20.1581	20.002	19.8239	0.524427	2.17855
Q9BXG8	SPZ1_HUMAN	SPZ1	Spermatogenic leucine zipper protein 1		21.2877	21.4425	21.3484	21.5498	19.4214	21.5356	0.523951	0.30044
Q06033	ITIH3_HUMAN	ITIH3	Inter-alpha-trypsin inhibitor heavy chain H3		25.7129	25.1833	25.2207	25.3778	24.5522	24.632	0.518298	0.760516
P51911	CNN1_HUMAN	CNN1	Calponin-1		21.9352	22.5892	23.5165	22.6907	22.4118	21.391	0.515784	0.354336
Q6PGN9	PSRC1_HUMAN	PSRC1	Proline/serine-rich coiled-coil protein 1		21.5356	20.7634	22.1174	20.714	22.2361	19.92	0.515483	0.261983
Q96H96	COQ2_HUMAN	COQ2	4-hydroxybenzoate polyprenyltransferase, mitochondrial		19.5586	19.1367	19.9909	19.1686	19.0457	18.9323	0.513206	0.938026
Q9H171	ZBP1_HUMAN	ZBP1	Z-DNA-binding protein 1		22.6736	20.2764	20.2302	20.1079	20.1704	21.3645	0.512475	0.220913
P07602	SAP_HUMAN	PSAP	Prosaposin		28.4473	28.7833	28.7771	28.0243	28.1984	28.249	0.511994	1.768
O75084	FZD7_HUMAN	FZD7	Frizzled-7		19.8959	19.7698	19.8785	19.3081	19.5813	19.1213	0.511144	1.6698
Q9UPU9	SMAG1_HUMAN	SAMD4A	Protein Smaug homolog 1		19.9145	19.4185	19.725	19.8744	18.5084	19.1426	0.510822	0.536045
P0DMV8;P0DMV9	HS71A_HUMAN;HS71B_HUMAN	HSPA1A;HSPA1B	Heat shock 70 kDa protein 1A		28.8653	29.2399	29.0914	28.4668	28.611	28.5933	0.508456	1.90101
Q15014	MO4L2_HUMAN	MORF4L2	Mortality factor 4-like protein 2		24.1332	23.7995	23.9316	23.6865	23.2679	23.391	0.506308	1.48787
O43524	FOXO3_HUMAN	FOXO3	Forkhead box protein O3		21.4375	21.2933	21.3962	20.9742	20.7389	20.895	0.506285	2.46969
Q15561	TEAD4_HUMAN	TEAD4	Transcriptional enhancer factor TEF-3		18.5754	20.2185	20.0426	18.6653	20.1581	18.5003	0.50425	0.272774
Q9NRX5	SERC1_HUMAN	SERINC1	Serine incorporator 1		24.6096	24.6971	24.6264	24.1332	24.1565	24.1332	0.503419	4.25588
Q8N196	SIX5_HUMAN	SIX5	Homeobox protein SIX5		19.1276	19.466	19.3815	18.8823	18.6952	18.8963	0.500411	1.84561
P52823	STC1_HUMAN	STC1	Stanniocalcin-1		24.1871	24.1332	24.0275	23.5754	23.6865	23.5869	0.499654	2.98244
Q9Y5Y0	FLVC1_HUMAN	FLVCR1	Heme transporter FLVCR1		19.0535	18.7822	18.7222	18.5903	18.1694	18.3063	0.497264	1.44054
P62995	TRA2B_HUMAN	TRA2B	Transformer-2 protein homolog beta		27.4154	27.3153	27.2979	26.8504	26.8019	26.8858	0.496806	3.45737
Q9NQ75	CASS4_HUMAN	CASS4	Cas scaffolding protein family member 4		20.0559	24.0526	21.8651	20.8252	21.2535	22.4118	0.494357	0.14726
Q13501	SQSTM_HUMAN	SQSTM1	Sequestosome-1		26.0062	25.8788	25.767	25.6068	25.2535	25.3101	0.493868	1.72346
Q9HCU9	BRMS1_HUMAN	BRMS1	Breast cancer metastasis-suppressor 1		21.5356	21.4067	21.1519	20.1946	21.0756	21.343	0.493661	0.606616
Q147U7	SMCO1_HUMAN	SMCO1	Single-pass membrane and coiled-coil domain-containing protein 1		19.6306	19.335	18.3287	19.3779	18.1931	18.2448	0.492833	0.374231
Q96KR6	F210B_HUMAN	FAM210B	Protein FAM210B, mitochondrial		20.4375	21.1581	20.6628	19.7554	20.8346	20.2066	0.487242	0.57287
P17028	ZNF24_HUMAN	ZNF24	Zinc finger protein 24		21.0559	20.9243	21.1457	20.3321	20.6276	20.7056	0.486898	1.69141
Q9UJA3	MCM8_HUMAN	MCM8	DNA helicase MCM8		22.0156	20.5823	20.6628	20.7223	20.5823	20.4972	0.486293	0.445065
P23471	PTPRZ_HUMAN	PTPRZ1	Receptor-type tyrosine-protein phosphatase zeta		27.0505	20.4273	27.2803	22.2036	27.1115	23.9933	0.483219	0.0630024
P63000	RAC1_HUMAN	RAC1	Ras-related C3 botulinum toxin substrate 1		27.8081	27.8974	27.7895	27.2262	27.341	27.4785	0.483126	2.41808
P62256	UBE2H_HUMAN	UBE2H	Ubiquitin-conjugating enzyme E2 H		25.9694	26.2589	25.9781	25.9271	24.8191	26.0169	0.481126	0.534681
Q8IWF6	DEN6A_HUMAN	DENND6A	Protein DENND6A		21.3857	20.9601	21.6364	20.8113	21.2933	20.4375	0.480084	0.689954
Q9H1C4	UN93B_HUMAN	UNC93B1	Protein unc-93 homolog B1		21.4676	21.8461	21.6843	21.2419	21.0359	21.2877	0.477514	1.62627
P34931	HS71L_HUMAN	HSPA1L	Heat shock 70 kDa protein 1-like		28.4473	28.8741	28.7895	28.17	28.2445	28.2803	0.472059	1.60801
Q5T3J3	LRIF1_HUMAN	LRIF1	Ligand-dependent nuclear receptor-interacting factor 1		27.7771	27.4862	27.673	26.8142	27.341	27.3662	0.471628	1.11425
Q7Z4F1	LRP10_HUMAN	LRP10	Low-density lipoprotein receptor-related protein 10		23.6096	23.5983	23.7077	23.0459	23.2679	23.1901	0.470587	2.51042
Q58A44	PCOTH_HUMAN	PCOTH	Prostate collagen triple helix protein		19.7067	20.002	19.7347	19.6699	19.1154	19.2516	0.46888	1.15119
Q8TE58	ATS15_HUMAN	ADAMTS15	A disintegrin and metalloproteinase with thrombospondin motifs 15		21.6453	22.1015	22.0426	20.654	21.7223	22.0122	0.466919	0.461387
Q9UK58	CCNL1_HUMAN	CCNL1	Cyclin-L1		22.2593	22.3511	22.2933	21.7307	21.9951	21.7796	0.466136	2.25906
P0C0L5	CO4B_HUMAN	C4B_2	Complement C4-B		25.5667	25.1055	25.3376	25.2353	24.5926	24.7895	0.464088	0.934839
Q9H3L0	MMAD_HUMAN	MMADHC	Cobalamin trafficking protein CblD		21.5451	21.5356	22.0756	21.4324	21.1015	21.2302	0.464088	1.0759
Q5VZP5	STYL2_HUMAN	STYXL2	Serine/threonine/tyrosine-interacting-like protein 2		19.1624	21.4324	20.5823	20.1206	18.9976	20.6714	0.462517	0.218203
P01024	CO3_HUMAN	C3	Complement C3		23.2961	22.9423	23.4551	22.9079	22.5892	22.8113	0.461735	1.21532
P78552	I13R1_HUMAN	IL13RA1	Interleukin-13 receptor subunit alpha-1		20.7307	20.654	20.5356	19.7867	20.343	20.4067	0.461317	1.05796
Q8TAP9	MPLKI_HUMAN	MPLKIP	M-phase-specific PLK1-interacting protein		22.2535	22.155	21.9098	21.6231	21.6929	21.6186	0.461222	1.92987
P15407	FOSL1_HUMAN	FOSL1	Fos-related antigen 1		24.1095	23.7077	23.8191	23.9495	23.0723	23.2317	0.460908	0.713486
A1L188	NDUF8_HUMAN	NDUFAF8	NADH dehydrogenase [ubiquinone] 1 alpha subcomplex assembly factor 8		18.3763	18.0814	18.5546	17.9307	17.7669	17.9442	0.456813	1.4243
Q14746	COG2_HUMAN	COG2	Conserved oligomeric Golgi complex subunit 2		24.1946	23.3645	23.848	23.2036	23.391	23.4425	0.456685	0.843246
Q86UT6	NLRX1_HUMAN	NLRX1	NLR family member X1		22.8442	21.8034	22.1976	21.8152	21.6141	22.0459	0.456657	0.626547
Q9NPF0	CD320_HUMAN	CD320	CD320 antigen		21.3592	21.6453	21.502	20.9672	21.1395	21.0359	0.454637	2.03352
Q8N3D4	EH1L1_HUMAN	EHBP1L1	EH domain-binding protein 1-like protein 1		25.0609	25.3844	25.9473	24.8858	25.0062	25.1449	0.451872	0.772103
Q9NSN8	SNTG1_HUMAN	SNTG1	Gamma-1-syntrophin		19.3936	19.2444	19.1086	18.0948	19.0017	19.2949	0.451714	0.537981
P00749	UROK_HUMAN	PLAU	Urokinase-type plasminogen activator		25.8093	25.7441	25.7895	25.3578	25.2535	25.3778	0.451258	3.32702
Q6PCB7	S27A1_HUMAN	SLC27A1	Long-chain fatty acid transport protein 1		23.8385	25.3031	22.8839	22.8727	23.9134	23.8858	0.451209	0.225444
Q5QGS0	NEXMI_HUMAN	NEXMIF	Neurite extension and migration factor		20.3101	20.9024	20.1581	19.923	20.0292	20.0691	0.449774	0.907916
Q5M7Z0	RNFT1_HUMAN	RNFT1	E3 ubiquitin-protein ligase RNFT1		19.6537	20.4012	19.5134	19.3893	19.344	19.493	0.447374	0.734819
P41162	ETV3_HUMAN	ETV3	ETS translocation variant 3		18.4273	18.129	18.0053	17.9705	17.6973	17.5531	0.446945	1.19954
Q9NRZ7	PLCC_HUMAN	AGPAT3	1-acyl-sn-glycerol-3-phosphate acyltransferase gamma		24.1253	23.9584	24.0105	23.48	23.5522	23.7286	0.444495	2.12738
P05362	ICAM1_HUMAN	ICAM1	Intercellular adhesion molecule 1		23.0789	23.2302	23.2535	22.5823	22.7935	22.8538	0.444325	1.96414
P33552	CKS2_HUMAN	CKS2	Cyclin-dependent kinases regulatory subunit 2		23.867	23.1301	23.2066	23.9134	22.5237	22.4476	0.439644	0.342893
P52945	PDX1_HUMAN	PDX1	Pancreas/duodenum homeobox protein 1		19.6193	17.8964	20.343	19.3943	18.3734	18.7726	0.439471	0.218204
Q8N884	CGAS_HUMAN	CGAS	Cyclic GMP-AMP synthase		20.5069	20.654	20.714	20.4676	20.4676	19.6367	0.43431	0.697727
Q5EBL8	PDZ11_HUMAN	PDZD11	PDZ domain-containing protein 11		25.3679	25.228	25.3066	24.7389	24.8717	24.989	0.434273	2.19921
Q8IZM8	ZN654_HUMAN	ZNF654	Zinc finger protein 654		19.8567	20.3538	20.2302	20.1581	18.8889	20.0951	0.432913	0.420142
Q96AE7	TTC17_HUMAN	TTC17	Tetratricopeptide repeat protein 17		23.2821	22.3184	23.1642	22.8727	22.4221	22.1765	0.431135	0.51761
Q9NUM3	S39A9_HUMAN	SLC39A9	Zinc transporter ZIP9		22.7471	22.1426	22.5638	20.0679	22.9654	23.1269	0.431095	0.160254
Q92543	SNX19_HUMAN	SNX19	Sorting nexin-19		20.5823	20.2066	20.4972	20.6364	20.5731	18.784	0.430833	0.280707
Q14592	ZN460_HUMAN	ZNF460	Zinc finger protein 460		18.3925	17.867	18.2642	17.6953	17.8686	17.668	0.430578	1.18918
Q86SE9	PCGF5_HUMAN	PCGF5	Polycomb group RING finger protein 5		18.6793	18.4193	18.4919	18.2124	18.2429	17.8447	0.430148	1.34478
P08253	MMP2_HUMAN	MMP2	72 kDa type IV collagenase		25.1371	25.239	25.2856	24.7338	24.7389	24.8997	0.429789	2.4496
Q9C0J9	BHE41_HUMAN	BHLHE41	Class E basic helix-loop-helix protein 41		19.8779	20.5451	20.2419	19.0346	20.3538	19.9882	0.429431	0.417528
Q9C0H2	TTYH3_HUMAN	TTYH3	Protein tweety homolog 3		24.3578	24.1565	24.141	24.0854	23.7286	23.5754	0.422003	1.19193
Q1A5X6	IQCJ_HUMAN	IQCJ	IQ domain-containing protein J		19.6599	17.8052	18.2498	18.0695	18.2427	18.1403	0.420772	0.305245
O75293	GA45B_HUMAN	GADD45B	Growth arrest and DNA damage-inducible protein GADD45 beta		19.0253	19.6144	19.4952	19.0574	17.3952	20.4202	0.420643	0.179055
Q9ULE3	DEN2A_HUMAN	DENND2A	DENN domain-containing protein 2A		23.0241	22.48	22.928	22.7203	21.1704	23.2821	0.4198	0.255323
P47974	TISD_HUMAN	ZFP36L2	mRNA decay activator protein ZFP36L2		24.0105	24.0275	23.8385	23.5404	23.5983	23.48	0.419254	2.42236
O14950;P19105	ML12A_HUMAN;ML12B_HUMAN	MYL12A;MYL12B	Myosin regulatory light chain 12B		30.0084	29.9259	29.8519	29.6303	29.4765	29.4254	0.417999	2.26592
P20742	PZP_HUMAN	PZP	Pregnancy zone protein		28.391	27.6458	27.965	28.1263	27.1214	27.5014	0.417555	0.501484
P60059	SC61G_HUMAN	SEC61G	Protein transport protein Sec61 subunit gamma		26.965	27.3153	27.2891	26.7389	26.8142	26.7645	0.417264	1.65621
P08236	BGLR_HUMAN	GUSB	Beta-glucuronidase		23.8093	24.5045	24.7796	23.7389	24.0935	24.0105	0.416812	0.606806
Q8TBZ6	TM10A_HUMAN	TRMT10A	tRNA methyltransferase 10 homolog A		21.7307	21.6929	21.5869	21.5069	21.1946	21.0625	0.415482	1.39763
Q99871	HAUS7_HUMAN	HAUS7	HAUS augmin-like complex subunit 7		19.1635	18.8126	18.9809	19.0355	18.3341	18.3456	0.413899	0.751316
Q9C0D7	ZC12C_HUMAN	ZC3H12C	Probable ribonuclease ZC3H12C		20.4676	20.714	20.4972	19.081	20.9812	20.3752	0.413797	0.296644
P62987	RL40_HUMAN	UBA52	Ubiquitin-ribosomal protein eL40 fusion protein		27.7325	27.2891	27.2891	26.7389	26.7895	27.5463	0.411985	0.616853
Q5T2D2	TRML2_HUMAN	TREML2	Trem-like transcript 2 protein		21.7876	22.8073	22.8423	22.9477	22.7286	20.5261	0.411599	0.185444
P26012	ITB8_HUMAN	ITGB8	Integrin beta-8		22.823	21.5404	21.5915	21.6584	21.4576	21.6096	0.409728	0.410938
Q09328	MGT5A_HUMAN	MGAT5	Alpha-1,6-mannosylglycoprotein 6-beta-N-acetylglucosaminyltransferase A		19.6344	19.6531	19.0635	19.3263	19.1175	18.6816	0.408566	0.685499
Q01546	K22O_HUMAN	KRT76	Keratin, type II cytoskeletal 2 oral		25.5075	22.7756	22.6342	23.1127	23.391	23.1886	0.408338	0.163661
Q96SL1	DIRC2_HUMAN	SLC49A4	Solute carrier family 49 member 4		21.6671	21.5261	21.4118	20.9171	21.2877	21.1765	0.407935	1.4339
Q9NW97	TMM51_HUMAN	TMEM51	Transmembrane protein 51		20.0426	19.9459	19.9882	19.8261	19.8983	19.0297	0.407522	0.65996
O60637	TSN3_HUMAN	TSPAN3	Tetraspanin-3		23.6865	23.5869	23.6431	23.5983	23.0526	23.0443	0.407087	1.03012
Q9UPN6	SCAF8_HUMAN	SCAF8	SR-related and CTD-associated factor 8		23.976	24.1332	24.2891	23.9672	23.3645	23.848	0.406173	0.924646
Q13873	BMPR2_HUMAN	BMPR2	Bone morphogenetic protein receptor type-2		23.2961	23.2961	23.2961	22.7594	22.9134	22.9985	0.405698	2.35634
O43184	ADA12_HUMAN	ADAM12	Disintegrin and metalloproteinase domain-containing protein 12		20.7796	20.2535	20.0156	20.1332	19.6169	20.0821	0.405488	0.657625
P12109	CO6A1_HUMAN	COL6A1	Collagen alpha-1(VI) chain		21.5592	21.7796	21.8913	21.2006	21.4874	21.3266	0.405154	1.46735
Q8WTZ4	CA5BL_HUMAN	CA5BP1	Putative inactive carbonic anhydrase 5B-like protein		18.784	18.517	18.3844	17.7846	18.3586	18.3287	0.404576	0.852601
P49450	CENPA_HUMAN	CENPA	Histone H3-like centromeric protein A		22.3725	22.3211	22.4526	21.5261	21.9316	22.4751	0.404508	0.660079
P50226	ST1A2_HUMAN	SULT1A2	Sulfotransferase 1A2		21.1581	21.3645	21.6497	20.1206	21.417	21.4221	0.404175	0.371249
Q8NE35	CPEB3_HUMAN	CPEB3	Cytoplasmic polyadenylation element-binding protein 3		20.5823	20.6006	20.7876	19.8564	20.417	20.4874	0.403226	0.894784
Q9Y244	POMP_HUMAN	POMP	Proteasome maturation protein		22.6453	22.6475	22.8839	22.5165	22.1363	22.3184	0.401794	1.38496
Q9NZJ5	E2AK3_HUMAN	EIF2AK3	Eukaryotic translation initiation factor 2-alpha kinase 3		20.9459	20.7634	20.9098	20.343	20.5356	20.5356	0.401619	2.03803
Q6NT04	TIGD7_HUMAN	TIGD7	Tigger transposable element-derived protein 7		19.86	18.619	18.6199	18.5546	18.6653	18.6766	0.400806	0.409811
P54802	ANAG_HUMAN	NAGLU	Alpha-N-acetylglucosaminidase		23.7796	23.9134	24.9406	23.7796	23.9043	23.7492	0.400176	0.468457
Q8IWB1	IPRI_HUMAN	ITPRIP	Inositol 1,4,5-trisphosphate receptor-interacting protein		22.8113	22.8365	22.8152	22.4651	22.3619	22.4375	0.399517	3.63385
Q9UHQ4	BAP29_HUMAN	BCAP29	B-cell receptor-associated protein 29		25.3376	25.2426	25.5492	24.8191	25.0105	25.1095	0.396772	1.47841
Q58F21	BRDT_HUMAN	BRDT	Bromodomain testis-specific protein		18.6093	20.7553	19.7187	19.4705	20.1825	18.2462	0.394709	0.178825
P30711	GSTT1_HUMAN	GSTT1	Glutathione S-transferase theta-1		23.8191	23.8385	23.8191	23.4041	23.3376	23.5522	0.394292	2.45931
Q9H8E8	CSR2B_HUMAN	KAT14	Cysteine-rich protein 2-binding protein		23.654	23.391	23.3376	23.0935	23.119	22.9882	0.393989	1.69173
P57087	JAM2_HUMAN	JAM2	Junctional adhesion molecule B		22.7035	22.8307	22.9152	22.3619	22.4375	22.4701	0.393342	2.3206
Q86VY9	T200A_HUMAN	TMEM200A	Transmembrane protein 200A		21.0292	20.7389	21.3484	20.3857	20.6714	20.8802	0.39306	0.800375
Q8N8E3	CE112_HUMAN	CEP112	Centrosomal protein of 112 kDa		21.5592	21.7056	21.5731	21.6364	20.6186	21.4067	0.392043	0.557666
O75626	PRDM1_HUMAN	PRDM1	PR domain zinc finger protein 1		22.6074	22.4947	23.7182	22.5285	22.4247	22.6971	0.389988	0.416755
P49767	VEGFC_HUMAN	VEGFC	Vascular endothelial growth factor C		22.2707	21.928	22.0054	21.8385	21.5213	21.68	0.388077	1.31337
P17677	NEUM_HUMAN	GAP43	Neuromodulin		17.7746	18.1732	18.2641	17.5578	17.7956	17.6977	0.386935	1.09987
Q16875	F263_HUMAN	PFKFB3	6-phosphofructo-2-kinase/fructose-2,6-bisphosphatase 3		24.2463	24.4862	24.5105	23.8093	24.141	24.1332	0.386465	1.31138
P82909	KGD4_HUMAN	KGD4	Alpha-ketoglutarate dehydrogenase component 4		25.0975	24.9361	24.8858	24.5638	24.5696	24.6264	0.386462	2.35044
P78314	3BP2_HUMAN	SH3BP2	SH3 domain-binding protein 2		19.9742	19.4366	20.2989	20.7056	18.3454	19.5037	0.385031	0.204759
Q9UKD2	MRT4_HUMAN	MRTO4	mRNA turnover protein 4 homolog		25.9361	25.9912	26.2625	25.6891	25.6865	25.6595	0.38489	1.71835
Q86TI0	TBCD1_HUMAN	TBC1D1	TBC1 domain family member 1		22.1079	21.9777	21.2361	22.2185	20.8034	21.1457	0.384709	0.310757
O94972	TRI37_HUMAN	TRIM37	E3 ubiquitin-protein ligase TRIM37		22.8385	18.0698	18.3326	20.3645	19.2345	18.4986	0.381077	0.0821488
Q12851	M4K2_HUMAN	MAP4K2	Mitogen-activated protein kinase kinase kinase kinase 2		20.2302	20.6364	20.343	19.6424	20.1079	20.3211	0.379421	0.743682
P17066	HSP76_HUMAN	HSPA6	Heat shock 70 kDa protein 6		28.6285	29.104	28.9567	28.3578	28.632	28.5718	0.375862	1.082
Q96CQ1	S2536_HUMAN	SLC25A36	Solute carrier family 25 member 36		18.7939	18.8366	18.6906	18.2351	18.3495	18.6132	0.374439	1.44901
Q08431	MFGM_HUMAN	MFGE8	Lactadherin		22.928	23.1795	23.2066	22.5754	22.7836	22.8365	0.372835	1.45225
Q9BUL9	RPP25_HUMAN	RPP25	Ribonuclease P protein subunit p25		19.985	18.5961	19.2242	18.8552	18.8466	18.9897	0.371232	0.386827
Q9UNL4	ING4_HUMAN	ING4	Inhibitor of growth protein 4		15.9238	16.6581	16.4625	15.6851	16.1626	16.0835	0.371044	0.631632
Q9UBC9	SPRR3_HUMAN	SPRR3	Small proline-rich protein 3		19.2124	19.1698	19.2104	18.9244	19.1521	18.408	0.369399	0.771396
Q8WVF1	OSCP1_HUMAN	OSCP1	Protein OSCP1		24.824	24.6264	25.228	24.2535	24.8385	24.48	0.368825	0.682681
Q96MY1	NOL4L_HUMAN	NOL4L	Nucleolar protein 4-like		22.0054	22.1581	22.1673	21.4425	21.8764	21.9098	0.367347	1.08348
Q13530	SERC3_HUMAN	SERINC3	Serine incorporator 3		23.0838	22.9513	22.9933	22.7451	22.5592	22.6231	0.366999	2.26485
Q8N264	RHG24_HUMAN	ARHGAP24	Rho GTPase-activating protein 24		18.2527	18.2604	18.3311	17.6656	18.0738	18.0038	0.36699	1.33642
P04179	SODM_HUMAN	SOD2	Superoxide dismutase [Mn], mitochondrial		26.3712	26.391	26.3376	26.1015	25.9694	25.9316	0.365767	2.61116
O00308	WWP2_HUMAN	WWP2	NEDD4-like E3 ubiquitin-protein ligase WWP2		22.4726	22.3294	22.3101	22.0459	22.0325	21.9388	0.364931	2.3971
Q9UID6	ZN639_HUMAN	ZNF639	Zinc finger protein 639		19.2391	19.2869	19.3595	19.7968	18.4771	18.5225	0.36304	0.346906
O14763	TR10B_HUMAN	TNFRSF10B	Tumor necrosis factor receptor superfamily member 10B		23.7182	23.6431	23.5869	23.2821	23.2961	23.2821	0.362624	3.1582
Q9HCU4	CELR2_HUMAN	CELSR2	Cadherin EGF LAG seven-pass G-type receptor 2		19.9601	20.1332	20.0426	19.3878	19.8339	19.8275	0.362225	1.09257
Q99828	CIB1_HUMAN	CIB1	Calcium and integrin-binding protein 1		21.5545	21.3321	21.3645	21.0691	20.9388	21.1581	0.361739	1.73439
Q9H0S4	DDX47_HUMAN	DDX47	Probable ATP-dependent RNA helicase DDX47		25.1908	25.1908	25.4138	24.9495	24.8764	24.8904	0.359709	2.01003
Q96JN0	LCOR_HUMAN	LCOR	Ligand-dependent corepressor		20.8651	20.4676	20.6364	20.6364	20.1206	20.1332	0.359653	0.810757
O94885	SASH1_HUMAN	SASH1	SAM and SH3 domain-containing protein 1		20.3211	20.3962	20.2419	20.0691	19.9601	19.8517	0.359463	2.0216
Q8N9Z2	CC71L_HUMAN	CCDC71L	Coiled-coil domain-containing protein 71L		23.7492	23.5869	23.3778	23.2961	23.3645	22.9795	0.357937	1.05058
O15239	NDUA1_HUMAN	NDUFA1	NADH dehydrogenase [ubiquinone] 1 alpha subcomplex subunit 1		23.3376	23.2463	23.211	22.8746	22.7533	23.0951	0.357323	1.54098
Q9UKJ5	CHIC2_HUMAN	CHIC2	Cysteine-rich hydrophobic domain-containing protein 2		21.5213	21.2361	21.5545	21.6497	20.6628	20.9316	0.355978	0.499241
Q9NPF2	CHSTB_HUMAN	CHST11	Carbohydrate sulfotransferase 11		21.9423	21.8727	21.9352	21.7836	21.2764	21.6231	0.355709	1.10562
Q14642	I5P1_HUMAN	INPP5A	Inositol polyphosphate-5-phosphatase A		22.7776	23.3645	23.9495	22.7077	22.7816	23.5404	0.353987	0.340045
Q9H6K4	OPA3_HUMAN	OPA3	Optic atrophy 3 protein		22.6929	23.0275	23.1976	22.1916	23.0258	22.6431	0.352496	0.551379
Q17RB0	RTL8B_HUMAN	RTL8B	Retrotransposon Gag-like protein 8B		24.2679	24.3778	24.4298	24.002	23.9495	24.0691	0.351659	2.40122
Q9Y561	LRP12_HUMAN	LRP12	Low-density lipoprotein receptor-related protein 12		22.1704	21.8269	21.6757	21.6141	21.3376	21.6671	0.351388	0.919617
P28300	LYOX_HUMAN	LOX	Protein-lysine 6-oxidase		26.5045	26.5754	26.7389	26.0401	26.3083	26.417	0.351124	1.25086
P49703	ARL4D_HUMAN	ARL4D	ADP-ribosylation factor-like protein 4D		21.9847	21.8839	22.7836	21.8802	21.9812	21.7389	0.350619	0.526221
Q14956	GPNMB_HUMAN	GPNMB	Transmembrane glycoprotein NMB		27.3828	27.5165	27.509	26.965	27.2625	27.1312	0.349863	1.65429
P24592	IBP6_HUMAN	IGFBP6	Insulin-like growth factor-binding protein 6		24.4488	24.7182	24.8093	24.1332	24.2607	24.5345	0.349325	1.02254
Q9UKJ3	GPTC8_HUMAN	GPATCH8	G patch domain-containing protein 8		22.8689	23.0609	22.2506	22.3266	22.2243	22.5823	0.34902	0.583917
Q8N0Y2	ZN444_HUMAN	ZNF444	Zinc finger protein 444		18.8081	18.8395	18.8662	17.6449	18.7367	19.0882	0.348018	0.329418
Q5VSG8	MANEL_HUMAN	MANEAL	Glycoprotein endo-alpha-1,2-mannosidase-like protein		20.9601	20.7876	20.6186	20.7389	20.5823	20.002	0.347703	0.640801
Q96I36	COX14_HUMAN	COX14	Cytochrome c oxidase assembly protein COX14		21.1269	21.2125	21.2419	20.895	20.5823	21.0625	0.347158	1.12691
Q8WY98	TM234_HUMAN	TMEM234	Transmembrane protein 234		23.7995	23.8858	23.2961	23.3778	23.2821	23.2821	0.346471	0.863534
A0A6Q8PHS2	A0A6Q8PHS2_HUMAN	LOC128071544	Uncharacterized protein		20.002	19.8589	19.8812	19.5709	19.7333	19.4	0.345968	1.50925
Q9Y4C1	KDM3A_HUMAN	KDM3A	Lysine-specific demethylase 3A		22.1206	22.3101	21.7389	21.417	21.895	21.8307	0.342274	0.692652
Q9UN70	PCDGK_HUMAN	PCDHGC3	Protocadherin gamma-C3		25.0691	25.1015	25.1642	24.7645	24.7594	24.7846	0.342127	3.53136
Q8NA72	POC5_HUMAN	POC5	Centrosomal protein POC5		20.7389	20.6453	20.2877	20.5069	20.2185	19.9232	0.341129	0.717115
P01023	A2MG_HUMAN	A2M	Alpha-2-macroglobulin		28.0711	27.2353	27.4938	27.7708	26.9088	27.1015	0.339722	0.399902
Q92624	APBP2_HUMAN	APPBP2	Amyloid protein-binding protein 2		22.3045	21.0821	21.5451	20.9882	21.4324	21.4923	0.339649	0.363352
Q8TAV4	STML3_HUMAN	STOML3	Stomatin-like protein 3		18.9659	18.7764	18.8917	18.538	18.568	18.5135	0.338193	2.38373
Q9UII2	ATIF1_HUMAN	ATP5IF1	ATPase inhibitor, mitochondrial		27.1015	27.17	27.17	26.8385	26.7645	26.8264	0.337379	3.32105
Q14520	HABP2_HUMAN	HABP2	Hyaluronan-binding protein 2		23.7695	23.4425	24.1253	23.2961	23.4425	23.5869	0.337264	0.719793
Q96MG7	NSE3_HUMAN	NSMCE3	Non-structural maintenance of chromosomes element 3 homolog		23.2214	22.9316	22.9951	22.8442	22.632	22.6606	0.337079	1.4229
Q96MH2	HEXI2_HUMAN	HEXIM2	Protein HEXIM2		19.2341	19.4784	19.4279	19.0248	19.2313	18.8765	0.3359	1.24186
Q9Y2K6	UBP20_HUMAN	USP20	Ubiquitin carboxyl-terminal hydrolase 20		20.0087	18.5488	18.7988	19.028	18.9331	18.3908	0.334809	0.272482
Q9BWW4	SSBP3_HUMAN	SSBP3	Single-stranded DNA-binding protein 3		20.9024	21.391	21.2302	20.6276	20.9388	20.953	0.334758	0.871702
Q9UBN6	TR10D_HUMAN	TNFRSF10D	Tumor necrosis factor receptor superfamily member 10D		22.5846	22.5451	22.6096	22.1206	22.2273	22.391	0.333492	1.83704
Q8WTX7	CAST1_HUMAN	CASTOR1	Cytosolic arginine sensor for mTORC1 subunit 1		20.4676	20.6006	20.7553	19.8454	20.2066	20.7715	0.333336	0.518999
P36955	PEDF_HUMAN	SERPINF1	Pigment epithelium-derived factor		21.1269	20.3321	21.1395	20.7056	20.3211	20.5731	0.33289	0.501941
Q9P031	TAP26_HUMAN	CCDC59	Thyroid transcription factor 1-associated protein 26		22.6074	22.4651	22.4375	22.4476	22.0393	22.0258	0.332443	1.0549
Q9UK73	FEM1B_HUMAN	FEM1B	Protein fem-1 homolog B		20.7955	20.7307	20.7553	20.3857	20.3101	20.5915	0.331388	1.73577
P11926	DCOR_HUMAN	ODC1	Ornithine decarboxylase		20.7471	20.343	20.4576	20.5356	19.8398	20.1825	0.329941	0.635343
Q96RD7	PANX1_HUMAN	PANX1	Pannexin-1		22.2477	22.0723	22.2477	22.0459	21.9742	21.5592	0.329485	0.948214
O95619	YETS4_HUMAN	YEATS4	YEATS domain-containing protein 4		22.44	22.3857	22.2273	22.0526	21.9171	22.0951	0.329437	1.77456
Q14657	LAGE3_HUMAN	LAGE3	EKC/KEOPS complex subunit LAGE3		21.1269	21.3156	21.4375	20.9812	21.0088	20.9024	0.329187	1.57872
P31431	SDC4_HUMAN	SDC4	Syndecan-4		24.1332	23.9406	23.9933	23.7182	23.6649	23.6971	0.328971	2.28107
Q15773	MLF2_HUMAN	MLF2	Myeloid leukemia factor 2		24.4234	24.2317	24.275	23.9584	23.9406	24.0443	0.328965	2.11371
Q5TH69	BIG3_HUMAN	ARFGEF3	Brefeldin A-inhibited guanine nucleotide-exchange protein 3		21.2877	23.8576	24.824	24.7543	22.1642	22.0658	0.328307	0.0846465
P54646	AAPK2_HUMAN	PRKAA2	5'-AMP-activated protein kinase catalytic subunit alpha-2		20.85	20.7389	20.7876	20.4775	20.4874	20.4273	0.328084	3.04275
P61421	VA0D1_HUMAN	ATP6V0D1	V-type proton ATPase subunit d 1		25.5285	25.5463	25.654	25.2317	25.2353	25.2785	0.327749	2.83702
Q9BYN0	SRXN1_HUMAN	SRXN1	Sulfiredoxin-1		23.1991	23.2419	23.2821	23.1063	22.9225	22.7119	0.327461	1.31694
Q9BXW3	SNH12_HUMAN	SNHG12	Putative uncharacterized protein SNHG12		19.9268	18.7316	17.8645	18.6022	18.4423	18.5002	0.326087	0.210788
Q99985	SEM3C_HUMAN	SEMA3C	Semaphorin-3C		25.1565	25.5463	25.5135	24.7182	25.2426	25.2785	0.32567	0.672019
Q9H6X2	ANTR1_HUMAN	ANTXR1	Anthrax toxin receptor 1		23.4676	23.6649	23.7695	23.0951	23.3645	23.4676	0.324946	1.07554
Q9H7M9	VISTA_HUMAN	VSIR	V-type immunoglobulin domain-containing suppressor of T-cell activation		20.9812	21.3266	21.4626	20.6971	20.8802	21.2185	0.324916	0.708382
Q01628	IFM3_HUMAN	IFITM3	Interferon-induced transmembrane protein 3		24.848	24.9803	24.9316	24.5225	24.6096	24.654	0.324579	2.3955
Q9BV57	MTND_HUMAN	ADI1	Acireductone dioxygenase		26.0105	25.5492	26.0062	25.3545	25.4707	25.7695	0.323756	0.756482
Q9H3Q1	BORG4_HUMAN	CDC42EP4	Cdc42 effector protein 4		21.9985	22.265	22.2214	21.5451	21.8461	22.1238	0.323306	0.801937
Q8NBJ9	SIDT2_HUMAN	SIDT2	SID1 transmembrane family member 2		18.9372	21.2933	24.1095	20.9243	21.3321	21.1143	0.323096	0.0757386
Q8NCS4	TM35B_HUMAN	TMEM35B	Transmembrane protein 35B		19.1368	19.1019	19.3604	17.7147	19.5529	19.3638	0.322545	0.21233
P62699	YPEL5_HUMAN	YPEL5	Protein yippee-like 5		22.6714	22.7286	22.7634	22.3752	22.3857	22.4375	0.321688	3.20672
Q9UPP1	PHF8_HUMAN	PHF8	Histone lysine demethylase PHF8		21.0886	21.0359	21.1143	20.8423	20.5451	20.8876	0.321251	1.3658
Q9GZY4	COA1_HUMAN	COA1	Cytochrome c oxidase assembly factor 1 homolog		21.8346	21.7675	21.654	21.4526	21.4626	21.3805	0.320134	2.25996
Q9BSE4	HERP2_HUMAN	HERPUD2	Homocysteine-responsive endoplasmic reticulum-resident ubiquitin-like domain member 2 protein		18.0053	18.2399	18.332	18.0016	17.807	17.8085	0.32007	1.28529
Q9UPW5	CBPC1_HUMAN	AGTPBP1	Cytosolic carboxypeptidase 1		21.4726	21.343	20.895	21.4015	20.6276	20.7223	0.319756	0.460215
Q8TD26	CHD6_HUMAN	CHD6	Chromodomain-helicase-DNA-binding protein 6		23.1348	23.2535	23.2273	22.85	22.9882	22.8191	0.319452	2.14137
P16870	CBPE_HUMAN	CPE	Carboxypeptidase E		19.81	19.7683	19.8493	19.4544	19.5656	19.4497	0.319284	2.69907
P56524	HDAC4_HUMAN	HDAC4	Histone deacetylase 4		18.6536	18.7183	18.6811	18.3715	18.3467	18.3781	0.318874	3.95507
Q13227	GPS2_HUMAN	GPS2	G protein pathway suppressor 2		21.8423	21.8423	21.7389	21.6096	21.3962	21.4626	0.318336	1.94237
P58546	MTPN_HUMAN	MTPN	Myotrophin		26.4218	26.5419	26.8264	26.4234	26.1332	26.2785	0.318303	1.02119
Q92546	RGP1_HUMAN	RGP1	RAB6A-GEF complex partner protein 2		23.1063	22.7161	22.7307	22.7876	22.5662	22.2448	0.318163	0.717161
Q9H0U9	TSYL1_HUMAN	TSPYL1	Testis-specific Y-encoded-like protein 1		21.8913	21.6231	21.5915	21.6971	21.2821	21.1765	0.316769	0.789548
Q8TCT8	SPP2A_HUMAN	SPPL2A	Signal peptide peptidase-like 2A		24.2961	24.4488	24.3101	24.0275	24.019	24.0609	0.315896	2.481
P48163	MAOX_HUMAN	ME1	NADP-dependent malic enzyme		24.5463	25.3239	25.1984	24.6431	24.824	24.654	0.315821	0.565633
P52429	DGKE_HUMAN	DGKE	Diacylglycerol kinase epsilon		19.1372	21.3962	19.4881	20.3962	19.8742	18.8052	0.31528	0.1381
O75127	PTCD1_HUMAN	PTCD1	Pentatricopeptide repeat-containing protein 1, mitochondrial		22.0459	21.7836	21.5117	21.8576	21.4375	21.1015	0.314898	0.516316
Q03013	GSTM4_HUMAN	GSTM4	Glutathione S-transferase Mu 4		25.275	25.6125	26.329	25.2243	25.5255	25.5225	0.314687	0.409354
P37173	TGFR2_HUMAN	TGFBR2	TGF-beta receptor type-2		21.8876	21.9495	21.953	21.7098	21.7512	21.3857	0.314468	1.2564
P25391	LAMA1_HUMAN	LAMA1	Laminin subunit alpha-1		23.2821	23.1596	23.4676	23.1488	23.141	22.6779	0.313868	0.808399
Q5VU57	CBPC6_HUMAN	AGBL4	Cytosolic carboxypeptidase 6		22.2877	22.4247	19.9169	21.3752	22.0951	20.2185	0.313539	0.11625
Q7Z7K6	CENPV_HUMAN	CENPV	Centromere protein V		23.3101	23.2506	23.2821	22.8538	22.8764	23.1765	0.312035	1.38157
O60315	ZEB2_HUMAN	ZEB2	Zinc finger E-box-binding homeobox 2		21.0224	20.6971	20.8034	20.4775	20.4676	20.6453	0.310839	1.30302
Q9H582	ZN644_HUMAN	ZNF644	Zinc finger protein 644		19.6003	19.2447	19.1717	19.2098	19.0345	18.8416	0.310251	0.848697
Q9P2K1	C2D2A_HUMAN	CC2D2A	Coiled-coil and C2 domain-containing protein 2A		21.0224	20.3752	20.654	20.3101	20.4375	20.3752	0.309639	0.743942
Q96BW1	UPP_HUMAN	UPRT	Uracil phosphoribosyltransferase homolog		21.0156	20.9951	20.9459	20.4874	20.6276	20.9171	0.308205	1.1307
Q9Y587	AP4S1_HUMAN	AP4S1	AP-4 complex subunit sigma-1		22.1488	22.8404	23.1363	22.2961	23.1015	21.8034	0.308157	0.256126
O95561	CA105_HUMAN	C1orf105	Uncharacterized protein C1orf105		18.3146	18.0674	17.9196	17.8929	17.7756	17.7088	0.308096	1.13934
Q9NWD8	TM248_HUMAN	TMEM248	Transmembrane protein 248		18.3941	18.7623	18.5034	18.5003	18.0204	18.2161	0.307632	0.803561
Q9NV56	MRGBP_HUMAN	MRGBP	MRG/MORF4L-binding protein		22.7182	22.4898	22.5165	22.4349	22.1111	22.2564	0.307384	1.22204
P58335	ANTR2_HUMAN	ANTXR2	Anthrax toxin receptor 2		24.3511	24.2891	24.3031	24.0359	23.976	24.0105	0.306988	3.55899
P19823	ITIH2_HUMAN	ITIH2	Inter-alpha-trypsin inhibitor heavy chain H2		23.9225	23.5869	23.848	23.6757	23.2821	23.48	0.306562	0.939934
Q9BWD3	RTL8A_HUMAN	RTL8A	Retrotransposon Gag-like protein 8A		23.7594	23.7796	23.8288	23.5165	23.5165	23.417	0.305902	2.84293
Q9NYZ1	TV23B_HUMAN	TVP23B	Golgi apparatus membrane protein TVP23 homolog B		23.417	23.6971	23.7492	23.2821	23.2346	23.4298	0.305595	1.2096
Q9Y5I3	PCDA1_HUMAN	PCDHA1	Protocadherin alpha-1		19.667	20.0821	20.1457	19.0689	19.9882	19.922	0.305257	0.387482
Q14197	ICT1_HUMAN	MRPL58	Large ribosomal subunit protein mL62		25.6375	25.8552	25.1871	25.3101	25.5696	24.8858	0.304774	0.471515
Q08345	DDR1_HUMAN	DDR1	Epithelial discoidin domain-containing receptor 1		22.0951	22.4651	22.5165	21.7715	22.1673	22.2243	0.304519	0.714886
P01033	TIMP1_HUMAN	TIMP1	Metalloproteinase inhibitor 1		23.2961	23.5522	23.5404	22.8423	23.3376	23.2961	0.304224	0.78283
Q8NAF0	ZN579_HUMAN	ZNF579	Zinc finger protein 579		23.0772	23.1991	23.155	22.7369	22.8614	22.9207	0.304138	2.02824
P07225	PROS_HUMAN	PROS1	Vitamin K-dependent protein S		21.68	23.391	21.4425	22.1143	21.8423	21.6497	0.302447	0.18347
P19438	TNR1A_HUMAN	TNFRSF1A	Tumor necrosis factor receptor superfamily member 1A		21.1946	21.6453	21.7098	21.2006	21.2243	21.2185	0.302081	0.866369
P84090	ERH_HUMAN	ERH	Enhancer of rudimentary homolog		27.5609	27.604	27.6251	27.3324	27.1214	27.4314	0.301573	1.49539
Q96QD8	S38A2_HUMAN	SLC38A2	Sodium-coupled neutral amino acid symporter 2		26.2317	25.895	25.9203	25.9825	25.6375	25.5225	0.301469	0.792972
P62861	RS30_HUMAN	FAU	Ubiquitin-like FUBI-ribosomal protein eS30 fusion protein		29.2216	29.0839	29.0164	28.8799	28.7486	28.7927	0.300224	1.85954
P55899	FCGRN_HUMAN	FCGRT	IgG receptor FcRn large subunit p51		21.7796	22.2736	22.2361	21.6141	21.8576	21.9171	0.30014	0.749825
P10276	RARA_HUMAN	RARA	Retinoic acid receptor alpha		21.8614	22.6364	21.85	21.5404	21.9024	22.0054	0.299855	0.433701
Q9NRP0	OSTC_HUMAN	OSTC	Oligosaccharyltransferase complex subunit OSTC		27.9977	28.2308	28.2625	27.673	27.9031	28.019	0.29858	1.06661
Q5FWE3	PRRT3_HUMAN	PRRT3	Proline-rich transmembrane protein 3		22.4118	22.6779	22.5892	22.0393	22.2961	22.4501	0.297807	0.975148
P21741	MK_HUMAN	MDK	Midkine		23.3239	23.5045	23.6649	22.953	23.155	23.4923	0.297648	0.735127
Q99728	BARD1_HUMAN	BARD1	BRCA1-associated RING domain protein 1		19.2053	21.5869	22.7533	21.0886	21.8269	19.7382	0.297301	0.0872485
Q16739	CEGT_HUMAN	UGCG	Ceramide glucosyltransferase		23.8288	23.3645	23.3778	23.4041	23.1174	23.1581	0.297198	0.773939
Q9NRJ4	TULP4_HUMAN	TULP4	Tubby-related protein 4		19.5973	19.7592	18.3738	18.5748	18.6601	19.6042	0.29704	0.210118
Q2MJR0	SPRE3_HUMAN	SPRED3	Sprouty-related, EVH1 domain-containing protein 3		18.8987	18.9222	18.8786	19.2451	18.0997	18.4643	0.296815	0.366974
Q9Y4D1	DAAM1_HUMAN	DAAM1	Disheveled-associated activator of morphogenesis 1		20.4676	20.3211	20.7553	20.0292	20.3962	20.2302	0.296144	0.827352
P55201	BRPF1_HUMAN	BRPF1	Peregrin		21.4425	21.3645	21.2535	20.8423	21.2477	21.0821	0.296137	1.07206
A2RU67	F234B_HUMAN	FAM234B	Protein FAM234B		20.7955	21.1825	21.0156	20.3321	20.9388	20.8346	0.296064	0.608251
Q9ULC8	ZDHC8_HUMAN	ZDHHC8	Palmitoyltransferase ZDHHC8		17.0757	16.8279	17.0713	16.4064	16.8252	16.8562	0.295713	0.822588
Q93073	SBP2L_HUMAN	SECISBP2L	Selenocysteine insertion sequence-binding protein 2-like		22.8152	22.2764	22.4298	22.4601	22.0258	22.1488	0.295554	0.648812
Q8WV24	PHLA1_HUMAN	PHLDA1	Pleckstrin homology-like domain family A member 1		24.7745	24.8191	24.7543	24.4923	24.5522	24.417	0.295502	2.60915
Q9BPX3	CND3_HUMAN	NCAPG	Condensin complex subunit 3		26.0711	25.7077	25.7389	25.9912	25.5638	25.0772	0.295149	0.438769
P15428	PGDH_HUMAN	HPGD	15-hydroxyprostaglandin dehydrogenase [NAD(+)]		20.4273	20.0691	20.3752	20.2419	18.9663	20.7796	0.294571	0.207515
P61923	COPZ1_HUMAN	COPZ1	Coatomer subunit zeta-1		26.4831	26.632	26.7771	26.3545	26.2353	26.4202	0.294038	1.36476
O60925	PFD1_HUMAN	PFDN1	Prefoldin subunit 1		26.0084	25.9271	25.9495	25.8764	25.4457	25.6811	0.293903	1.08922
P13726	TF_HUMAN	F3	Tissue factor		27.4862	27.1115	27.3239	27.1795	26.8858	26.976	0.293432	0.989969
O75191	XYLB_HUMAN	XYLB	Xylulose kinase		21.3045	22.3725	24.8811	24.8093	21.7876	21.0886	0.290888	0.0650109
Q8NEC7	GSTCD_HUMAN	GSTCD	Glutathione S-transferase C-terminal domain-containing protein		21.4874	21.8385	21.632	21.417	21.3376	21.3321	0.290396	1.29042
Q8N3X1	FNBP4_HUMAN	FNBP4	Formin-binding protein 4		21.714	22.44	21.8034	21.417	21.3805	22.2905	0.289797	0.316135
Q12981	SEC20_HUMAN	BNIP1	Vesicle transport protein SEC20		24.5812	24.6649	24.6865	24.0275	24.4105	24.6264	0.289361	0.746037
P10620	MGST1_HUMAN	MGST1	Microsomal glutathione S-transferase 1		28.55	28.4707	28.5315	28.1164	28.2353	28.3324	0.289307	1.90671
P81605	DCD_HUMAN	DCD	Dermcidin		23.3376	23.654	24.0935	23.391	23.3239	23.5045	0.288568	0.569144
P08648	ITA5_HUMAN	ITGA5	Integrin alpha-5		27.1604	27.0914	27.2077	26.9203	26.7771	26.8974	0.288285	2.17652
O75956	CDKA2_HUMAN	CDK2AP2	Cyclin-dependent kinase 2-associated protein 2		23.155	23.0443	23.1047	22.7035	22.8746	22.8614	0.288197	1.97596
Q15596	NCOA2_HUMAN	NCOA2	Nuclear receptor coactivator 2		18.5326	18.721	19.014	18.7641	18.2937	18.3461	0.28784	0.634917
Q9NQ84	GPC5C_HUMAN	GPRC5C	G-protein coupled receptor family C group 5 member C		23.184	23.3239	23.391	22.4947	23.3645	23.1765	0.28774	0.45785
P17936	IBP3_HUMAN	IGFBP3	Insulin-like growth factor-binding protein 3		22.2849	22.3403	22.4825	21.9601	21.9882	22.2961	0.287737	1.10297
Q86VQ6	TRXR3_HUMAN	TXNRD3	Thioredoxin reductase 3		21.6757	24.2891	22.4092	22.5117	22.7533	22.2477	0.287129	0.133574
P07205	PGK2_HUMAN	PGK2	Phosphoglycerate kinase 2		28.7581	28.726	28.7708	28.3153	28.4234	28.6561	0.286699	1.32324
Q92963	RIT1_HUMAN	RIT1	GTP-binding protein Rit1		22.5213	22.3266	21.4526	21.3805	22.2361	21.8269	0.28572	0.27955
Q8TEV9	SMCR8_HUMAN	SMCR8	Guanine nucleotide exchange protein SMCR8		20.7955	20.3538	20.1946	20.714	19.7889	19.9882	0.284306	0.354404
P78352	DLG4_HUMAN	DLG4	Disks large homolog 4		23.9225	23.7695	24.217	23.5638	23.8288	23.6649	0.283812	0.866832
Q9HCG1	ZN160_HUMAN	ZNF160	Zinc finger protein 160		19.287	18.8548	20.5261	18.6948	19.5271	19.5947	0.28374	0.18745
Q9H0H3	KLH25_HUMAN	KLHL25	Kelch-like protein 25		19.518	19.5791	19.1957	19.1662	18.988	19.2887	0.283284	0.895236
Q9NQ38	ISK5_HUMAN	SPINK5	Serine protease inhibitor Kazal-type 5		22.1015	21.3699	21.9882	21.4221	19.8382	23.3511	0.282677	0.0972457
O95838	GLP2R_HUMAN	GLP2R	Glucagon-like peptide 2 receptor		20.265	19.6011	19.9243	19.9742	19.1536	19.8158	0.282246	0.374322
Q15569	TESK1_HUMAN	TESK1	Dual specificity testis-specific protein kinase 1		20.1332	21.6276	21.417	20.8727	21.1946	20.265	0.28183	0.200839
P28799	GRN_HUMAN	GRN	Progranulin		26.726	26.976	26.965	26.3578	26.7129	26.7517	0.281477	0.876399
Q9Y3E0	GOT1B_HUMAN	GOLT1B	Vesicle transport protein GOT1B		25.0062	25.1871	25.2926	24.6757	24.8858	25.0813	0.281046	0.911791
P60709	ACTB_HUMAN	ACTB	Actin, cytoplasmic 1		33.7047	33.7751	33.7849	33.4334	33.4702	33.5179	0.281031	2.87656
P03951	FA11_HUMAN	F11	Coagulation factor XI		21.5451	21.5685	21.7512	21.1143	21.5545	21.3538	0.280753	0.917111
P0CG13	CTF8_HUMAN	CHTF8	Chromosome transmission fidelity protein 8 homolog		21.1457	20.7955	20.8651	20.9024	20.5356	20.5261	0.28072	0.791721
Q8IV03	LUR1L_HUMAN	LURAP1L	Leucine rich adaptor protein 1-like		21.5261	21.3857	21.0493	20.3962	21.3752	21.3484	0.280435	0.328046
Q9H3M7	TXNIP_HUMAN	TXNIP	Thioredoxin-interacting protein		24.0526	24.0609	23.9134	23.6757	23.867	23.6431	0.280345	1.52858
P55058	PLTP_HUMAN	PLTP	Phospholipid transfer protein		21.1143	20.7634	21.1825	20.6453	20.7955	20.7796	0.279966	0.94724
P63272	SPT4H_HUMAN	SUPT4H1	Transcription elongation factor SPT4		24.2463	24.2317	24.1253	23.976	23.867	23.9225	0.27926	2.31616
Q9Y4H2	IRS2_HUMAN	IRS2	Insulin receptor substrate 2		22.0224	22.3565	22.2877	21.6231	22.1206	22.0854	0.279182	0.666597
Q6UX07	DHR13_HUMAN	DHRS13	Dehydrogenase/reductase SDR family member 13		19.2573	19.1997	19.0433	19.0168	18.819	18.8277	0.278932	1.42865
Q9UMQ6	CAN11_HUMAN	CAPN11	Calpain-11		21.3101	20.953	18.1844	18.8018	22.1047	18.7088	0.277421	0.0647725
Q96HU1	SGSM3_HUMAN	SGSM3	Small G protein signaling modulator 3		20.7389	20.5069	20.5731	19.6529	20.6628	20.6714	0.277291	0.331006
P46778	RL21_HUMAN	RPL21	Large ribosomal subunit protein eL21		29.3704	29.341	29.0453	28.9869	28.805	29.1337	0.277026	0.919318
Q8WWX9	SELM_HUMAN	SELENOM	Selenoprotein M		22.9777	22.9601	23.3778	22.3538	23.1488	22.9847	0.276131	0.423765
P43007	SATT_HUMAN	SLC1A4	Neutral amino acid transporter A		21.6714	21.0756	21.4324	21.3699	20.9672	21.0156	0.275572	0.571005
Q9BYV8	CEP41_HUMAN	CEP41	Centrosomal protein of 41 kDa		24.5345	24.3307	24.141	24.3031	24.3645	23.5165	0.274009	0.390877
Q9H8P0	PORED_HUMAN	SRD5A3	Polyprenol reductase		22.9207	23.3511	23.0983	23.0723	22.8461	22.6298	0.273944	0.699041
Q9BRK0	REEP2_HUMAN	REEP2	Receptor expression-enhancing protein 2		18.9253	19.1601	19.4884	18.8302	19.2397	18.684	0.273318	0.514256
Q9UET6	TRM7_HUMAN	FTSJ1	tRNA (cytidine(32)/guanosine(34)-2'-O)-methyltransferase		24.1719	24.1946	24.0105	23.7286	24.0526	23.7796	0.272091	1.10216
Q14164	IKKE_HUMAN	IKBKE	Inhibitor of nuclear factor kappa-B kinase subunit epsilon		22.7574	22.654	23.181	22.7915	22.2849	22.7013	0.271544	0.533428
O96017	CHK2_HUMAN	CHEK2	Serine/threonine-protein kinase Chk2		20.85	20.6886	20.6453	21.2006	19.134	21.0359	0.271091	0.151916
Q02241	KIF23_HUMAN	KIF23	Kinesin-like protein KIF23		22.2621	20.9951	20.8423	22.1916	20.5451	20.5545	0.269435	0.140822
P78549	NTH_HUMAN	NTHL1	Endonuclease III-like protein 1		20.6628	20.6276	20.5451	20.3538	20.3752	20.2989	0.269166	2.53151
Q14114	LRP8_HUMAN	LRP8	Low-density lipoprotein receptor-related protein 8		23.2961	23.1519	22.8346	23.1916	22.4298	22.8576	0.267888	0.443994
P0C0S5;Q71UI9	H2AV_HUMAN;H2AZ_HUMAN	H2AZ1;H2AZ2	Histone H2A.Z		29.17	29.0427	28.9977	28.7195	28.7988	28.8887	0.267782	1.70685
Q5MNZ9	WIPI1_HUMAN	WIPI1	WD repeat domain phosphoinositide-interacting protein 1		22.3376	22.5045	22.5285	22.1916	22.2419	22.1395	0.265852	1.78223
P50281	MMP14_HUMAN	MMP14	Matrix metalloproteinase-14		26.9977	27.0084	27.0296	26.7129	26.6998	26.8264	0.265525	2.52238
Q8NBT2	SPC24_HUMAN	SPC24	Kinetochore protein Spc24		23.4923	22.9725	22.9134	23.3778	22.6497	22.5545	0.265395	0.34529
Q8WUQ7	CATIN_HUMAN	CACTIN	Splicing factor Cactin		20.9812	20.8576	20.8576	20.6276	20.6453	20.6276	0.265317	2.50738
Q99732	LITAF_HUMAN	LITAF	Lipopolysaccharide-induced tumor necrosis factor-alpha factor		24.918	24.7645	24.8904	24.4298	24.5983	24.7492	0.265171	1.20249
O14561	ACPM_HUMAN	NDUFAB1	Acyl carrier protein, mitochondrial		22.1734	22.1673	22.1946	21.9388	21.8987	21.9024	0.265128	4.19566
Q96MC6	MF14A_HUMAN	MFSD14A	Hippocampus abundant transcript 1 protein		16.5964	16.2052	15.9987	15.8143	15.9737	16.2173	0.265043	0.557364
P15529	MCP_HUMAN	CD46	Membrane cofactor protein		24.9225	24.8142	24.9361	24.6811	24.5983	24.5983	0.265017	2.29868
Q9H0K6	PUS7L_HUMAN	PUS7L	Pseudouridylate synthase PUS7L		23.0609	22.8171	22.7594	22.7675	22.6253	22.4501	0.264818	0.951696
Q9C005	DPY30_HUMAN	DPY30	Protein dpy-30 homolog		19.0815	19.0036	19.5996	19.138	18.8757	18.8786	0.264169	0.569452
Q71F56	MD13L_HUMAN	MED13L	Mediator of RNA polymerase II transcription subunit 13-like		21.1519	20.895	20.714	20.4067	20.6096	20.953	0.263859	0.576318
Q8NB15	ZN511_HUMAN	ZNF511	Zinc finger protein 511		21.4825	21.2066	21.3376	21.2185	21.0088	21.0088	0.26351	1.16913
O14678	ABCD4_HUMAN	ABCD4	Lysosomal cobalamin transporter ABCD4		19.0579	19.0194	19.0428	18.9619	18.6818	18.6859	0.263506	1.32116
O95379	TFIP8_HUMAN	TNFAIP8	Tumor necrosis factor alpha-induced protein 8		24.945	24.8997	24.9803	24.8191	24.3307	24.8858	0.26314	0.677215
P36941	TNR3_HUMAN	LTBR	Tumor necrosis factor receptor superfamily member 3		23.217	23.1658	23.4298	23.0559	22.7955	23.1719	0.263089	0.891599
O14579	COPE_HUMAN	COPE	Coatomer subunit epsilon		27.3578	27.509	27.5682	27.217	27.141	27.2891	0.262637	1.58941
Q9NZQ7	PD1L1_HUMAN	CD274	Programmed cell death 1 ligand 1		23.4676	23.0409	23.1316	23.1063	22.8132	22.9334	0.262429	0.779753
P09913	IFIT2_HUMAN	IFIT2	Interferon-induced protein with tetratricopeptide repeats 2		22.0325	22.3156	22.2185	21.8346	22.0886	21.8576	0.261943	1.0604
Q96DE5	APC16_HUMAN	ANAPC16	Anaphase-promoting complex subunit 16		21.7307	21.1206	21.0951	21.2764	20.9316	20.953	0.26177	0.482602
Q9NX04	AIRIM_HUMAN	AIRIM	AFG2-interacting ribosome maturation factor		20.654	20.3962	20.2764	20.4375	20.1457	19.9601	0.261126	0.66466
O15438	MRP3_HUMAN	ABCC3	ATP-binding cassette sub-family C member 3		19.6185	20.8802	20.9951	19.1715	20.895	20.6453	0.260623	0.138553
Q7L5Y1	ENOF1_HUMAN	ENOSF1	Mitochondrial enolase superfamily member 1		21.9243	21.6757	21.5356	21.5309	21.3321	21.4923	0.260145	0.943946
Q9NYJ1	COA4_HUMAN	COA4	Cytochrome c oxidase assembly factor 4 homolog, mitochondrial		19.8832	19.7152	20.002	19.8969	19.5303	19.3933	0.259979	0.688716
Q9ULJ6	ZMIZ1_HUMAN	ZMIZ1	Zinc finger MIZ domain-containing protein 1		23.6096	23.6431	23.4425	23.2821	23.3239	23.3101	0.259733	1.83077
Q9H1H9	KI13A_HUMAN	KIF13A	Kinesin-like protein KIF13A		22.6757	22.7223	22.7013	22.5045	22.6006	22.2155	0.259623	1.04688
Q96HA7	TONSL_HUMAN	TONSL	Tonsoku-like protein		22.0821	20.3752	20.2419	21.5592	19.9459	20.417	0.259039	0.124392
O15305	PMM2_HUMAN	PMM2	Phosphomannomutase 2		26.1095	25.6292	25.9869	25.5725	25.5983	25.7796	0.25838	0.750679
Q92625	ANS1A_HUMAN	ANKS1A	Ankyrin repeat and SAM domain-containing protein 1A		23.6971	23.848	24.1565	23.5045	23.654	23.7695	0.257893	0.763309
P23508	CRCM_HUMAN	MCC	Colorectal mutant cancer protein		23.0641	23.5165	23.4425	22.8876	23.2679	23.0951	0.257554	0.654401
Q9H116	GZF1_HUMAN	GZF1	GDNF-inducible zinc finger protein 1		21.1143	21.0886	20.654	20.5915	20.6453	20.85	0.256732	0.692643
Q96PV6	LENG8_HUMAN	LENG8	Leukocyte receptor cluster member 8		22.654	22.6253	22.6119	22.417	22.2506	22.4551	0.256175	1.79316
A0A0J9YXX1	HV5X1_HUMAN	IGHV5-10-1	Immunoglobulin heavy variable 5-10-1		19.3379	19.2804	19.781	19.035	19.3619	19.2387	0.25455	0.619479
Q8TBE1	CNIH3_HUMAN	CNIH3	Protein cornichon homolog 3		20.6263	20.7471	21.0886	20.5261	20.4067	20.7715	0.252598	0.652039
P23921	RIR1_HUMAN	RRM1	Ribonucleoside-diphosphate reductase large subunit		26.4218	26.3239	25.7645	26.2643	25.6403	25.848	0.252511	0.386867
Q9H977	WDR54_HUMAN	WDR54	WD repeat-containing protein 54		23.3376	22.0821	22.0821	22.4092	21.953	22.3831	0.252138	0.221592
Q08117	TLE5_HUMAN	TLE5	TLE family member 5		22.654	22.6431	22.7675	22.5213	22.3778	22.4118	0.2512	1.88865
Q99788	CML1_HUMAN	CMKLR1	Chemerin-like receptor 1		22.2302	22.7286	22.502	22.0393	22.1856	22.4825	0.251185	0.575588
P56817	BACE1_HUMAN	BACE1	Beta-secretase 1		21.7389	21.3538	21.4324	21.343	21.0821	21.3484	0.250522	0.788058
Q5TGL8	PXDC1_HUMAN	PXDC1	PX domain-containing protein 1		25.5609	25.6125	25.7363	25.275	25.3844	25.5014	0.249632	1.39298
Q6ZU80	CE128_HUMAN	CEP128	Centrosomal protein of 128 kDa		18.5093	19.9342	18.0329	18.9828	18.1597	18.5853	0.249544	0.150401
Q6VUC0	AP2E_HUMAN	TFAP2E	Transcription factor AP-2-epsilon		20.5731	20.7634	20.7876	21.0426	20.0156	20.3211	0.24825	0.327287
P62306	RUXF_HUMAN	SNRPF	Small nuclear ribonucleoprotein F		27.0084	26.7895	26.7389	26.5653	26.5551	26.673	0.247816	1.27881
Q99622	C10_HUMAN	C12orf57	Protein C10		18.8333	19.1337	19.3223	18.9932	18.498	19.0551	0.247684	0.47394
Q9NS84	CHST7_HUMAN	CHST7	Carbohydrate sulfotransferase 7		18.0747	18.2921	18.2754	17.9057	18.0351	17.9616	0.246564	1.44583
C9J7I0	UMAD1_HUMAN	UMAD1	UBAP1-MVB12-associated (UMA)-domain containing protein 1		18.8209	18.947	19.207	18.9257	18.7158	18.5949	0.246159	0.75856
Q5VTL8	PR38B_HUMAN	PRPF38B	Pre-mRNA-splicing factor 38B		23.1719	23.1031	23.0641	22.6364	22.9933	22.9725	0.245626	0.959497
Q9Y5F8	PCDGJ_HUMAN	PCDHGB7	Protocadherin gamma-B7		22.5522	22.7796	22.7369	22.2736	22.6779	22.3805	0.245558	0.813897
Q9UHL0	DDX25_HUMAN	DDX25	ATP-dependent RNA helicase DDX25		23.2679	23.3239	23.087	23.1047	22.7389	23.0999	0.245075	0.805797
Q14686	NCOA6_HUMAN	NCOA6	Nuclear receptor coactivator 6		21.2066	21.1704	20.9601	21.0691	20.7307	20.8034	0.244643	0.88813
Q86TJ2	TAD2B_HUMAN	TADA2B	Transcriptional adapter 2-beta		17.8349	17.9305	17.9032	17.7556	17.7116	17.4683	0.244383	1.22463
Q6IQ22	RAB12_HUMAN	RAB12	Ras-related protein Rab-12		24.1174	24.1015	24.141	23.8858	23.9225	23.8191	0.24419	2.78116
P21579	SYT1_HUMAN	SYT1	Synaptotagmin-1		23.7796	23.8858	23.8093	23.4676	23.632	23.6431	0.243984	1.70257
O00198	HRK_HUMAN	HRK	Activator of apoptosis harakiri		22.3592	22.3017	22.1734	21.9566	22.1301	22.019	0.242875	1.50296
Q92979	NEP1_HUMAN	EMG1	Ribosomal RNA small subunit methyltransferase NEP1		24.7995	24.2096	24.2535	24.2679	23.9847	24.2821	0.242638	0.497189
Q9Y548	YIPF1_HUMAN	YIPF1	Protein YIPF1		21.9459	21.7836	21.7915	21.6757	21.6453	21.4726	0.242483	1.37365
Q9Y5J9	TIM8B_HUMAN	TIMM8B	Mitochondrial import inner membrane translocase subunit Tim8 B		21.3321	21.1269	21.4626	21.4118	20.7876	20.9951	0.2424	0.51074
Q6PK18	OGFD3_HUMAN	OGFOD3	2-oxoglutarate and iron-dependent oxygenase domain-containing protein 3		23.9672	23.867	24.1095	23.5285	23.7389	23.9495	0.242263	0.797084
P36268	GGT2_HUMAN	GGT2P	Inactive glutathione hydrolase 2		19.8455	18.8377	18.1701	18.446	18.8467	18.8339	0.242246	0.183008
Q6UXD5	SE6L2_HUMAN	SEZ6L2	Seizure 6-like protein 2		24.5754	24.6431	24.6811	24.1565	24.632	24.3844	0.242207	0.794926
Q96F45	ZN503_HUMAN	ZNF503	Zinc finger protein 503		19.5862	18.3649	18.6851	18.4013	18.6903	18.8182	0.242133	0.248446
Q9Y466	NR2E1_HUMAN	NR2E1	Nuclear receptor subfamily 2 group E member 1		19.1144	19.7237	19.6515	19.8585	19.9316	17.9731	0.242108	0.133231
Q9H3F6	BACD3_HUMAN	KCTD10	BTB/POZ domain-containing adapter for CUL3-mediated RhoA degradation protein 3		24.6757	24.7234	24.7745	24.5404	24.391	24.5165	0.241917	1.94761
Q9BRS8	LARP6_HUMAN	LARP6	La-related protein 6		24.5165	24.7441	24.5696	24.3307	24.3444	24.4298	0.241777	1.48558
O60462	NRP2_HUMAN	NRP2	Neuropilin-2		23.0967	23.2006	23.0476	22.8307	22.9316	22.8576	0.241666	1.95047
Q01081	U2AF1_HUMAN	U2AF1	Splicing factor U2AF 35 kDa subunit		26.4057	26.4024	26.417	26.2151	26.1214	26.1642	0.241455	3.03571
Q9BX68	HINT2_HUMAN	HINT2	Adenosine 5'-monophosphoramidase HINT2		23.7286	23.8288	23.8576	23.5522	23.5754	23.5638	0.241182	2.43204
Q9BSI4	TINF2_HUMAN	TINF2	TERF1-interacting nuclear factor 2		20.0156	20.0821	20.4375	20.2302	19.029	20.5545	0.240506	0.191065
O95104	SCAF4_HUMAN	SCAF4	SR-related and CTD-associated factor 4		24.3511	24.2821	24.1946	24.0275	24.0105	24.0691	0.240231	2.11079
P78537	BL1S1_HUMAN	BLOC1S1	Biogenesis of lysosome-related organelles complex 1 subunit 1		22.9882	22.8595	22.8727	22.6886	22.6119	22.6992	0.240195	2.0868
P49407	ARRB1_HUMAN	ARRB1	Beta-arrestin-1		22.8132	22.9882	23.1316	22.8404	22.7836	22.5915	0.239192	0.940595
P61812	TGFB2_HUMAN	TGFB2	Transforming growth factor beta-2 proprotein		24.918	24.9803	25.1604	24.5225	24.8385	24.9803	0.239126	0.711151
Q9Y3C0	WASC3_HUMAN	WASHC3	WASH complex subunit 3		23.9043	24.0609	23.9933	23.5983	23.6757	23.9672	0.23907	0.922191
Q9BZX2	UCK2_HUMAN	UCK2	Uridine-cytidine kinase 2		26.3049	25.7338	25.6971	25.989	25.433	25.6012	0.237514	0.390456
Q96T37	RBM15_HUMAN	RBM15	RNA-binding protein 15		29.5591	25.2714	29.4785	28.7988	25.5195	29.2781	0.237508	0.0439624
Q5U3C3	TM164_HUMAN	TMEM164	Transmembrane protein 164		23.3376	23.5045	23.3645	23.1285	23.0854	23.2821	0.236872	1.39813
Q96GM5	SMRD1_HUMAN	SMARCD1	SWI/SNF-related matrix-associated actin-dependent regulator of chromatin subfamily D member 1		22.4996	22.2036	22.1795	22.1047	22.019	22.0493	0.236567	1.04916
Q9NWW5	CLN6_HUMAN	CLN6	Ceroid-lipofuscinosis neuronal protein 6		24.002	23.9672	23.9225	23.7594	23.7796	23.6431	0.236553	2.09206
Q15291	RBBP5_HUMAN	RBBP5	Retinoblastoma-binding protein 5		24.4738	24.6096	24.7024	24.417	24.217	24.4425	0.236457	1.14146
Q70HW3	SAMC_HUMAN	SLC25A26	Mitochondrial S-adenosylmethionine carrier protein		22.3619	21.6929	21.9637	21.8614	22.0359	21.4118	0.236427	0.367633
Q9NYP7	ELOV5_HUMAN	ELOVL5	Very long chain fatty acid elongase 5		26.1642	25.5374	26.2821	25.9338	25.5869	25.7543	0.236224	0.396424
O95402	MED26_HUMAN	MED26	Mediator of RNA polymerase II transcription subunit 26		22.2477	22.4972	22.5117	22.1704	21.9847	22.3936	0.23598	0.741517
Q9NZN8	CNOT2_HUMAN	CNOT2	CCR4-NOT transcription complex subunit 2		23.654	23.6209	23.7077	23.4041	23.4425	23.4298	0.23539	2.97778
Q13077	TRAF1_HUMAN	TRAF1	TNF receptor-associated factor 1		22.7995	22.8054	22.6971	22.5961	22.4501	22.5498	0.235329	1.87511
Q8WVD3	RN138_HUMAN	RNF138	E3 ubiquitin-protein ligase RNF138		18.9367	19.8188	18.2218	19.3531	18.7951	18.1244	0.234936	0.150329
P78325	ADAM8_HUMAN	ADAM8	Disintegrin and metalloproteinase domain-containing protein 8		20.1946	20.3538	20.4067	20.002	20.5165	19.7321	0.234825	0.419049
P35367	HRH1_HUMAN	HRH1	Histamine H1 receptor		20.6186	20.5823	20.4273	20.1206	20.2302	20.5731	0.234761	0.724008
O00487	PSDE_HUMAN	PSMD14	26S proteasome non-ATPase regulatory subunit 14		27.3578	27.3578	27.3066	27.0813	27.0296	27.2077	0.234556	1.87035
Q9BUR5	MIC26_HUMAN	APOO	MICOS complex subunit MIC26		24.1015	24.0275	24.0275	23.8858	23.7895	23.7796	0.233866	2.29685
Q03518	TAP1_HUMAN	TAP1	Antigen peptide transporter 1		23.2961	23.3645	23.2821	23.0376	23.0674	23.1363	0.233795	2.41862
Q6ICG6	K0930_HUMAN	KIAA0930	Uncharacterized protein KIAA0930		19.9459	19.8049	19.9183	19.7118	19.7044	19.5516	0.233775	1.58441
P17302	CXA1_HUMAN	GJA1	Gap junction alpha-1 protein		27.4073	27.341	27.3324	27.141	27.189	27.0505	0.233407	2.11557
Q5VTQ0	TT39B_HUMAN	TTC39B	Tetratricopeptide repeat protein 39B		20.2877	21.5869	21.0886	20.6886	21.3805	20.1946	0.233193	0.172612
P04733	MT1F_HUMAN	MT1F	Metallothionein-1F		19.8947	20.0951	19.1255	19.7563	19.4029	19.2582	0.232642	0.283769
P52926	HMGA2_HUMAN	HMGA2	High mobility group protein HMGI-C		25.1984	25.1332	25.2021	24.8858	24.9316	25.019	0.23243	2.17424
Q9NVV5	AIG1_HUMAN	AIG1	Androgen-induced gene 1 protein		21.1079	21.6671	21.4626	20.68	21.3592	21.502	0.232129	0.314724
Q24JP5	T132A_HUMAN	TMEM132A	Transmembrane protein 132A		21.3857	21.3266	21.1395	21.0625	20.9601	21.1332	0.231999	1.21617
O14495	PLPP3_HUMAN	PLPP3	Phospholipid phosphatase 3		22.7389	22.417	22.4923	22.4144	22.3376	22.2036	0.230878	0.938076
Q9ULW3	ABT1_HUMAN	ABT1	Activator of basal transcription 1		21.7389	21.6364	21.6886	21.4874	21.4775	21.4067	0.230793	2.38846
Q9ULQ0	STRP2_HUMAN	STRIP2	Striatin-interacting protein 2		20.2419	19.5344	19.8478	19.7048	19.4774	19.7508	0.23038	0.447432
Q6XUX3	DUSTY_HUMAN	DSTYK	Dual serine/threonine and tyrosine protein kinase		24.217	24.1253	24.1095	23.895	24.0772	23.7895	0.229986	1.19505
P54760	EPHB4_HUMAN	EPHB4	Ephrin type-B receptor 4		23.3101	23.4298	23.48	23.0409	23.0723	23.417	0.229877	0.814903
Q8NCF5	NF2IP_HUMAN	NFATC2IP	NFATC2-interacting protein		19.9459	19.3649	19.626	20.2066	18.7157	19.3262	0.229436	0.189079
P01008	ANT3_HUMAN	SERPINC1	Antithrombin-III		25.1946	25.0275	25.2679	24.9406	24.8858	24.976	0.229221	1.40862
Q53GA4	PHLA2_HUMAN	PHLDA2	Pleckstrin homology-like domain family A member 2		23.48	23.4551	23.5285	23.2961	23.239	23.2434	0.22838	2.89204
Q9BY76	ANGL4_HUMAN	ANGPTL4	Angiopoietin-related protein 4		21.2006	21.5117	21.5592	20.8802	21.2707	21.4375	0.227719	0.497573
Q8N2E2	VWDE_HUMAN	VWDE	von Willebrand factor D and EGF domain-containing protein		21.9951	18.9571	17.5345	17.4941	21.002	19.3082	0.227484	0.0469002
Q9Y219	JAG2_HUMAN	JAG2	Protein jagged-2		17.5118	17.1222	17.435	16.6093	17.324	17.4557	0.226639	0.322123
Q9Y616	IRAK3_HUMAN	IRAK3	Interleukin-1 receptor-associated kinase 3		23.3239	23.1363	23.2021	23.1332	22.9637	22.8858	0.226561	1.16559
Q14469	HES1_HUMAN	HES1	Transcription factor HES-1		19.6133	19.644	19.6686	19.7539	20.0365	18.4569	0.226225	0.176414
Q9NUP1	BL1S4_HUMAN	BLOC1S4	Biogenesis of lysosome-related organelles complex 1 subunit 4		22.5685	22.5237	22.4375	22.3156	22.265	22.2707	0.226118	2.25309
O00560	SDCB1_HUMAN	SDCBP	Syntenin-1		25.1681	24.867	24.848	24.9361	24.6649	24.604	0.226049	0.709602
P40189	IL6RB_HUMAN	IL6ST	Interleukin-6 receptor subunit beta		24.4676	24.3578	24.3511	24.1253	24.1871	24.1871	0.225695	2.20017
Q6P4Q7	CNNM4_HUMAN	CNNM4	Metal transporter CNNM4		19.6481	19.9459	20.002	19.0652	19.9882	19.868	0.224849	0.293982
Q96FT9	IFT43_HUMAN	IFT43	Intraflagellar transport protein 43 homolog		19.6444	19.537	19.4832	19.1853	19.4473	19.359	0.224361	1.16719
O43752	STX6_HUMAN	STX6	Syntaxin-6		23.8191	23.7389	23.9933	23.5522	23.7286	23.5983	0.2241	1.14781
Q9ULJ3	ZBT21_HUMAN	ZBTB21	Zinc finger and BTB domain-containing protein 21		21.4425	21.2707	21.1765	21.0951	20.9459	21.1765	0.224081	1.02059
Q16623	STX1A_HUMAN	STX1A	Syntaxin-1A		21.2933	21.3101	21.4476	20.9672	21.4526	20.9601	0.223684	0.586736
Q9NPI6	DCP1A_HUMAN	DCP1A	mRNA-decapping enzyme 1A		24.9316	24.8997	24.8385	24.6811	24.6264	24.6918	0.223448	2.55704
Q9UQ88	CD11A_HUMAN	CDK11A	Cyclin-dependent kinase 11A		20.6364	20.4676	20.5731	20.5261	20.1825	20.2989	0.223197	0.929232
Q9NVK5	FGOP2_HUMAN	FGFR1OP2	FGFR1 oncogene partner 2		21.7553	21.8034	21.6409	21.4923	21.4067	21.632	0.222881	1.28287
Q96MP8	KCTD7_HUMAN	KCTD7	BTB/POZ domain-containing protein KCTD7		18.3632	18.8969	18.3183	18.3467	18.3892	18.1749	0.222534	0.492216
O75879	GATB_HUMAN	GATB	Glutamyl-tRNA(Gln) amidotransferase subunit B, mitochondrial		22.7995	22.8132	22.8269	22.7389	22.68	22.3592	0.220481	0.867355
Q9NY26	S39A1_HUMAN	SLC39A1	Zinc transporter ZIP1		23.0967	22.9134	22.9477	22.6907	22.6886	22.9171	0.220474	1.09823
Q15652	JHD2C_HUMAN	JMJD1C	Probable JmjC domain-containing histone demethylation protein 2C		22.1301	21.9882	21.9024	21.9423	21.6231	21.7955	0.219893	0.902636
Q9BVS5	TR61B_HUMAN	TRMT61B	tRNA (adenine(58)-N(1))-methyltransferase, mitochondrial		25.4041	24.8336	24.8433	24.7645	24.7389	24.918	0.219866	0.486511
P99999	CYC_HUMAN	CYCS	Cytochrome c		28.4154	28.459	28.4433	28.2262	28.1842	28.249	0.219449	3.18171
Q12766	HMGX3_HUMAN	HMGXB3	HMG domain-containing protein 3		20.7553	19.6924	22.4067	22.6779	20.7715	18.7472	0.219224	0.0546814
Q6PI47	KCD18_HUMAN	KCTD18	BTB/POZ domain-containing protein KCTD18		21.4626	21.7715	22.4144	21.5261	21.7836	21.6843	0.218194	0.306334
Q29983	MICA_HUMAN	MICA	MHC class I polypeptide-related sequence A		22.3484	22.2707	22.1795	22.1886	21.9098	22.0459	0.218111	1.08932
Q03169	TNAP2_HUMAN	TNFAIP2	Tumor necrosis factor alpha-induced protein 2		21.2125	21.2361	21.2125	20.8576	21.0756	21.0756	0.217443	1.38758
Q9H1J1	REN3A_HUMAN	UPF3A	Regulator of nonsense transcripts 3A		20.417	20.5165	20.3211	20.265	20.1079	20.2302	0.217184	1.37337
Q07890	SOS2_HUMAN	SOS2	Son of sevenless homolog 2		20.5545	21.0426	20.953	20.5823	20.3352	20.9812	0.217133	0.378868
Q13214	SEM3B_HUMAN	SEMA3B	Semaphorin-3B		20.8727	20.9951	21.0426	20.6096	20.7471	20.9024	0.217047	1.03419
Q9H0C5	BTBD1_HUMAN	BTBD1	BTB/POZ domain-containing protein 1		20.5915	20.6886	20.7389	20.4874	20.3645	20.5165	0.216855	1.56866
Q8TCX1	DC2L1_HUMAN	DYNC2LI1	Cytoplasmic dynein 2 light intermediate chain 1		22.8288	21.4015	21.9423	21.4425	21.5731	22.5069	0.216696	0.151326
Q8IY57	YAF2_HUMAN	YAF2	YY1-associated factor 2		20.7876	20.6628	20.6886	20.5356	20.5261	20.4273	0.216626	1.86707
O75828	CBR3_HUMAN	CBR3	Carbonyl reductase [NADPH] 3		25.8717	26.0212	25.9157	25.6068	25.6811	25.8717	0.216311	1.12408
Q14517	FAT1_HUMAN	FAT1	Protocadherin Fat 1		25.0062	24.8576	24.9672	24.7024	24.6971	24.7846	0.215645	1.82408
Q8IWU2	LMTK2_HUMAN	LMTK2	Serine/threonine-protein kinase LMTK2		20.4676	20.5451	20.953	20.3538	20.0426	20.9243	0.21501	0.290997
Q9NNX1	TUFT1_HUMAN	TUFT1	Tuftelin		24.002	23.7695	23.9584	23.7695	23.5869	23.7286	0.214942	1.11974
Q9BQP7	MGME1_HUMAN	MGME1	Mitochondrial genome maintenance exonuclease 1		24.4105	23.8093	24.217	24.239	24.0609	23.4923	0.214897	0.305439
P06213	INSR_HUMAN	INSR	Insulin receptor		21.6409	21.9243	21.7915	21.5451	21.7056	21.4626	0.214477	0.922726
O95477	ABCA1_HUMAN	ABCA1	Phospholipid-transporting ATPase ABCA1		22.1363	22.5045	22.5522	21.8073	22.3321	22.4118	0.213887	0.391154
Q86X95	CIR1_HUMAN	CIR1	Corepressor interacting with RBPJ 1		21.4923	21.3101	21.5404	21.0625	21.3699	21.2707	0.213224	0.865871
P49810	PSN2_HUMAN	PSEN2	Presenilin-2		22.0054	22.0459	21.9985	21.3857	22.0723	21.953	0.2129	0.428608
Q8TB96	TIP_HUMAN	ITFG1	T-cell immunomodulatory protein		22.1269	22.2877	22.3936	21.8461	22.0821	22.2419	0.212694	0.699351
P01130	LDLR_HUMAN	LDLR	Low-density lipoprotein receptor		25.1833	24.895	24.8997	24.9628	24.7234	24.6595	0.210777	0.727269
Q9Y3B2	EXOS1_HUMAN	EXOSC1	Exosome complex component CSL4		24.5638	24.4862	24.5225	24.4105	24.3444	24.1871	0.210189	1.4003
Q96C10	DHX58_HUMAN	DHX58	ATP-dependent RNA helicase DHX58		19.6929	20.4375	19.4845	20.3211	19.6631	19.0006	0.210008	0.165306
Q9Y608	LRRF2_HUMAN	LRRFIP2	Leucine-rich repeat flightless-interacting protein 2		24.3031	24.1719	24.2021	24.0691	23.9933	23.9847	0.210003	1.92719
Q9NYF3	FA53C_HUMAN	FAM53C	Protein FAM53C		18.9255	19.3383	18.8256	18.7249	18.7097	19.025	0.209897	0.487174
A6NKF1	SAC31_HUMAN	SAC3D1	SAC3 domain-containing protein 1		21.8764	20.9316	21.4425	21.823	21.1704	20.6276	0.209873	0.181397
Q13443	ADAM9_HUMAN	ADAM9	Disintegrin and metalloproteinase domain-containing protein 9		25.4041	25.3811	25.4202	25.1833	25.1757	25.217	0.209815	3.60491
Q16832	DDR2_HUMAN	DDR2	Discoidin domain-containing receptor 2		24.2096	24.0609	24.0526	24.0854	23.7796	23.8288	0.209746	0.909462
Q9H773	DCTP1_HUMAN	DCTPP1	dCTP pyrophosphatase 1		25.3376	25.1681	25.1449	25.0854	24.8858	25.0526	0.208938	1.13409
Q9BVC3	DCC1_HUMAN	DSCC1	Sister chromatid cohesion protein DCC1		21.7389	21.2477	21.4324	21.4576	21.2593	21.0756	0.208834	0.505337
P09601	HMOX1_HUMAN	HMOX1	Heme oxygenase 1		25.6264	25.7517	25.7208	25.2571	25.5841	25.632	0.208604	0.77746
Q16563	SYPL1_HUMAN	SYPL1	Synaptophysin-like protein 1		25.8904	26.1814	25.9803	25.8623	25.6431	25.9225	0.20808	0.795156
Q9H013	ADA19_HUMAN	ADAM19	Disintegrin and metalloproteinase domain-containing protein 19		22.7856	22.9225	23.0772	22.5213	22.6606	22.9812	0.207408	0.576944
P98153	IDD_HUMAN	DGCR2	Integral membrane protein DGCR2/IDD		19.5858	19.5264	19.4964	19.4028	19.6	18.984	0.207284	0.492459
P48307	TFPI2_HUMAN	TFPI2	Tissue factor pathway inhibitor 2		24.6153	24.918	25.0317	24.1871	24.7846	24.9716	0.207244	0.317557
Q9H9S4	CB39L_HUMAN	CAB39L	Calcium-binding protein 39-like		19.5027	20.0951	20.4676	19.5062	20.2302	19.7081	0.206949	0.228851
Q9UQR0	SCML2_HUMAN	SCML2	Sex comb on midleg-like protein 2		19.9459	19.5803	19.2513	19.6011	19.2734	19.2825	0.206797	0.381756
Q99650	OSMR_HUMAN	OSMR	Oncostatin-M-specific receptor subunit beta		21.5961	21.1642	21.4923	21.1206	21.2877	21.2243	0.206633	0.67528
Q5SWH9	TMM69_HUMAN	TMEM69	Transmembrane protein 69		21.3538	21.2933	21.2125	21.0756	20.9882	21.1765	0.20648	1.41266
Q8N4N3	KLH36_HUMAN	KLHL36	Kelch-like protein 36		19.3091	19.4912	19.2908	19.3726	19.1854	18.9139	0.206402	0.629136
P51810	GP143_HUMAN	GPR143	G-protein coupled receptor 143		20.5823	20.2419	20.265	20.1332	20.2302	20.1079	0.205971	0.822718
Q53RE8	ANR39_HUMAN	ANKRD39	Ankyrin repeat domain-containing protein 39		21.0088	20.654	20.7223	21.0224	20.1825	20.5638	0.205466	0.316069
Q9Y4L5	RN115_HUMAN	RNF115	E3 ubiquitin-protein ligase RNF115		21.0625	20.8269	20.714	20.6186	20.5261	20.8423	0.205434	0.670056
P06454	PTMA_HUMAN	PTMA	Prothymosin alpha		29.6561	29.604	29.6128	29.4688	29.3787	29.4093	0.205372	2.57141
Q8WXA9	SREK1_HUMAN	SREK1	Splicing regulatory glutamine/lysine-rich protein 1		24.48	23.4425	23.4923	23.7077	23.5045	23.5869	0.205256	0.235263
A8MQ03	CRTP1_HUMAN	CYSRT1	Cysteine-rich tail protein 1		19.1552	18.8915	19.8415	18.689	19.8727	18.7116	0.204974	0.159325
P58215	LOXL3_HUMAN	LOXL3	Lysyl oxidase homolog 3		21.2707	21.3805	21.5451	21.3156	21.1332	21.1332	0.204752	0.955825
Q9NZD2	GLTP_HUMAN	GLTP	Glycolipid transfer protein		24.7338	24.7846	24.8385	24.5754	24.5522	24.6153	0.204648	2.35181
P48454	PP2BC_HUMAN	PPP3CC	Serine/threonine-protein phosphatase 2B catalytic subunit gamma isoform		22.3511	22.3936	22.2214	22.1916	22.1047	22.0559	0.204648	1.4563
Q8IYU2	HACE1_HUMAN	HACE1	E3 ubiquitin-protein ligase HACE1		21.6006	21.8191	21.5961	21.0156	21.7836	21.6051	0.203805	0.347213
Q86U90	YRDC_HUMAN	YRDC	Threonylcarbamoyl-AMP synthase		22.4996	22.6822	22.7955	22.6886	22.3129	22.3645	0.20377	0.629398
Q9NY61	AATF_HUMAN	AATF	Protein AATF		22.8633	22.5069	22.4425	22.4751	22.3073	22.4196	0.203575	0.659255
Q8WXB1	MT21A_HUMAN	METTL21A	Protein N-lysine methyltransferase METTL21A		21.0625	21.0821	21.0156	20.8269	20.7634	20.9601	0.203269	1.53196
Q96QC0	PP1RA_HUMAN	PPP1R10	Serine/threonine-protein phosphatase 1 regulatory subunit 10		23.976	23.976	23.9406	23.8288	23.6865	23.7695	0.202569	2.03682
P02748	CO9_HUMAN	C9	Complement component C9		23.3101	22.7836	23.1332	23.4298	22.2564	22.9334	0.202426	0.209915
Q9UL25	RAB21_HUMAN	RAB21	Ras-related protein Rab-21		28.6898	28.6216	28.6075	28.5014	28.3869	28.4234	0.20238	2.05935
P05997	CO5A2_HUMAN	COL5A2	Collagen alpha-2(V) chain		23.6649	23.8288	23.9043	23.2961	23.6757	23.8191	0.202343	0.518762
Q9BXI6	TB10A_HUMAN	TBC1D10A	TBC1 domain family member 10A		23.8288	23.48	23.7492	23.5045	23.4923	23.4551	0.202045	0.883208
O76080	ZFAN5_HUMAN	ZFAND5	AN1-type zinc finger protein 5		22.6971	22.502	22.6387	22.5592	22.2764	22.3962	0.201992	0.942184
Q9H488	OFUT1_HUMAN	POFUT1	GDP-fucose protein O-fucosyltransferase 1		25.9628	25.9473	25.8834	25.5463	25.772	25.8694	0.201931	0.957526
Q9NP66	HM20A_HUMAN	HMG20A	High mobility group protein 20A		24.8142	24.5812	24.217	24.0609	24.4298	24.5165	0.201721	0.380069
Q8NBQ5	DHB11_HUMAN	HSD17B11	Estradiol 17-beta-dehydrogenase 11		24.7594	24.7796	25.1371	24.4923	24.7995	24.7796	0.201586	0.567763
Q13829	BACD2_HUMAN	TNFAIP1	BTB/POZ domain-containing adapter for CUL3-mediated RhoA degradation protein 2		19.7322	19.691	19.9244	19.4692	19.6127	19.6618	0.20132	1.02451
Q86SK9	SCD5_HUMAN	SCD5	Stearoyl-CoA desaturase 5		23.4298	23.3101	23.2375	23.2375	23.1901	22.9459	0.201295	0.881884
Q7Z7C8	TAF8_HUMAN	TAF8	Transcription initiation factor TFIID subunit 8		18.512	18.2734	18.3378	18.4062	18.1111	18.002	0.201288	0.648961
Q13137	CACO2_HUMAN	CALCOCO2	Calcium-binding and coiled-coil domain-containing protein 2		22.7389	22.5983	22.4247	22.5309	22.2185	22.4092	0.201124	0.715023
Q9P1U0	RPA12_HUMAN	POLR1H	DNA-directed RNA polymerase I subunit RPA12		18.2834	18.5191	18.714	18.6366	18.4901	17.7877	0.200723	0.278213
P60002	ELOF1_HUMAN	ELOF1	Transcription elongation factor 1 homolog		20.4775	20.5356	20.3101	20.3321	20.0691	20.3211	0.200315	0.851228
Q8N1S5	S39AB_HUMAN	SLC39A11	Zinc transporter ZIP11		20.895	21.0691	21.3101	20.8346	20.8576	20.9812	0.200274	0.711011
P13716	HEM2_HUMAN	ALAD	Delta-aminolevulinic acid dehydratase		24.7077	24.7796	25.0401	24.4984	24.6486	24.7796	0.200274	0.705189
Q96J42	TXD15_HUMAN	TXNDC15	Thioredoxin domain-containing protein 15		23.417	23.5983	23.4425	23.1856	23.4041	23.2679	0.200128	1.10365
Q8IZE3	PACE1_HUMAN	SCYL3	Protein-associating with the carboxyl-terminal domain of ezrin		20.3857	20.6096	20.5545	20.2989	20.265	20.3857	0.200069	1.23088
Q66K79	CBPZ_HUMAN	CPZ	Carboxypeptidase Z		20.953	21.4375	21.2989	20.417	21.2821	21.391	0.199795	0.230263
Q9UI08	EVL_HUMAN	EVL	Ena/VASP-like protein		20.4476	20.6886	20.5545	20.5069	20.1581	20.4273	0.199484	0.721496
Q5T200	ZC3HD_HUMAN	ZC3H13	Zinc finger CCCH domain-containing protein 13		22.9261	22.8876	22.937	22.8113	22.6929	22.6497	0.198985	1.76849
Q9NXK8	FXL12_HUMAN	FBXL12	F-box/LRR-repeat protein 12		21.3857	21.1079	21.0691	21.2361	20.8727	20.8576	0.198795	0.554211
Q13509	TBB3_HUMAN	TUBB3	Tubulin beta-3 chain		32.341	32.2563	32.2106	32.1392	32.0184	32.0544	0.198636	1.71669
Q8TBF5	PIGX_HUMAN	PIGX	Phosphatidylinositol-glycan biosynthesis class X protein		22.019	21.9742	21.4626	21.7634	21.5498	21.5498	0.197608	0.441445
Q8N257	H2B3B_HUMAN	H2BC26	Histone H2B type 3-B		30.5389	30.5664	30.611	30.4433	30.2979	30.3828	0.197444	1.85979
Q9P2P5	HECW2_HUMAN	HECW2	E3 ubiquitin-protein ligase HECW2		23.3239	23.2679	23.1961	22.9777	23.0207	23.1976	0.197267	1.20745
P02511	CRYAB_HUMAN	CRYAB	Alpha-crystallin B chain		20.953	20.9024	21.1519	20.7876	20.8651	20.7634	0.197076	1.12908
Q96EX1	SIM12_HUMAN	SMIM12	Small integral membrane protein 12		22.0625	22.0592	22.1015	21.928	21.7512	21.953	0.196985	1.41282
A6NDR6	ME3L1_HUMAN	MEIS3P1	Putative homeobox protein Meis3-like 1		20.8034	20.9243	21.1015	20.68	20.5915	20.9672	0.196843	0.620252
Q9BWG4	SSBP4_HUMAN	SSBP4	Single-stranded DNA-binding protein 4		22.0854	21.9882	22.0789	21.9847	21.7471	21.8307	0.196611	1.21064
Q9UK53	ING1_HUMAN	ING1	Inhibitor of growth protein 1		19.9459	19.905	19.9882	19.7682	19.693	19.7897	0.196068	2.17825
Q6NUS6	TECT3_HUMAN	TCTN3	Tectonic-3		23.4298	23.6649	23.6096	23.3778	23.4298	23.3101	0.195553	1.1642
Q9UBK9	UXT_HUMAN	UXT	Protein UXT		24.9716	24.9225	24.7846	24.8288	24.4862	24.7796	0.194714	0.739771
O14966	RAB7L_HUMAN	RAB29	Ras-related protein Rab-7L1		21.1946	21.0224	21.1642	20.9601	20.9951	20.8423	0.194581	1.29608
A2RUC4	TYW5_HUMAN	TYW5	tRNA wybutosine-synthesizing protein 5		20.9459	22.7119	21.6276	22.2006	21.2361	21.265	0.194564	0.117208
Q6ZT12	UBR3_HUMAN	UBR3	E3 ubiquitin-protein ligase UBR3		25.019	24.9088	24.989	24.604	24.8623	24.867	0.194523	0.981237
P98095	FBLN2_HUMAN	FBLN2	Fibulin-2		19.572	19.555	19.4011	19.2606	19.5727	19.112	0.194272	0.593922
Q9P215	POGK_HUMAN	POGK	Pogo transposable element with KRAB domain		24.1565	23.9495	23.8288	23.895	23.7389	23.7182	0.194234	0.811264
Q9H0X4	F234A_HUMAN	FAM234A	Protein FAM234A		23.9043	24.1253	24.1795	23.654	24.1253	23.848	0.193893	0.53194
Q16763	UBE2S_HUMAN	UBE2S	Ubiquitin-conjugating enzyme E2 S		23.3376	22.3045	22.2006	23.1704	21.9777	22.1143	0.193452	0.136495
Q969T3	SNX21_HUMAN	SNX21	Sorting nexin-21		20.4067	20.6971	20.8034	20.3211	20.3962	20.6096	0.193386	0.588543
O95865	DDAH2_HUMAN	DDAH2	Putative hydrolase DDAH2		25.0975	25.2961	25.3342	24.9225	25.0813	25.1449	0.193007	0.912166
Q9NS69	TOM22_HUMAN	TOMM22	Mitochondrial import receptor subunit TOM22 homolog		23.6865	23.654	23.7389	23.7995	23.3778	23.3239	0.192746	0.561393
P18669	PGAM1_HUMAN	PGAM1	Phosphoglycerate mutase 1		30.9677	31.0609	30.8974	30.6798	30.8081	30.8608	0.192424	1.26048
O75477	ERLN1_HUMAN	ERLIN1	Erlin-1		26.965	26.433	26.4645	26.5225	26.4024	26.3612	0.192121	0.464027
P05121	PAI1_HUMAN	SERPINE1	Plasminogen activator inhibitor 1		28.2759	27.9372	28.1164	28.0762	27.7453	27.9316	0.192118	0.63234
P49842	STK19_HUMAN	STK19	Inactive serine/threonine-protein kinase 19		18.7285	18.4457	19.0055	18.9639	18.1356	18.5038	0.192111	0.265531
P02795	MT2_HUMAN	MT2A	Metallothionein-2		30.7047	30.5573	30.4919	30.6198	30.196	30.362	0.192012	0.623961
Q86UE8	TLK2_HUMAN	TLK2	Serine/threonine-protein kinase tousled-like 2		22.6929	22.4923	22.4349	22.44	22.1143	22.4898	0.191987	0.609105
B4DX44	ZN736_HUMAN	ZNF736	Zinc finger protein 736		19.0576	19.2458	19.2207	19.3163	19.0505	18.5823	0.191641	0.358872
Q9H8M9	EVA1A_HUMAN	EVA1A	Protein eva-1 homolog A		22.823	22.7594	22.5823	22.7955	22.2125	22.5823	0.191448	0.444951
P62875	RPAB5_HUMAN	POLR2L	DNA-directed RNA polymerases I, II, and III subunit RPABC5		24.9933	24.7895	24.7695	24.7895	24.5983	24.5926	0.190633	0.923542
Q96SZ6	CK5P1_HUMAN	CDK5RAP1	Mitochondrial tRNA methylthiotransferase CDK5RAP1		20.9812	20.9243	20.9812	20.7955	20.8576	20.6628	0.190303	1.46001
Q5FYB0	ARSJ_HUMAN	ARSJ	Arylsulfatase J		20.7056	19.9882	20.3321	20.343	19.8137	20.2989	0.19007	0.286581
P55786	PSA_HUMAN	NPEPPS	Puromycin-sensitive aminopeptidase		27.5969	27.3239	27.4154	27.1115	27.2891	27.3662	0.189794	0.796248
Q9Y5W9	SNX11_HUMAN	SNX11	Sorting nexin-11		23.3239	20.9243	21.7013	22.3457	21.2593	21.7756	0.189683	0.087076
O95297	MPZL1_HUMAN	MPZL1	Myelin protein zero-like protein 1		25.0526	25.0148	25.0854	24.7543	24.8764	24.9539	0.18936	1.43043
O95365	ZBT7A_HUMAN	ZBTB7A	Zinc finger and BTB domain-containing protein 7A		22.0156	21.6757	21.7796	21.7796	21.4221	21.7013	0.189295	0.568889
O75964	ATP5L_HUMAN	ATP5MG	ATP synthase subunit g, mitochondrial		27.3153	27.391	27.341	27.1214	27.17	27.189	0.18897	2.4894
P52333	JAK3_HUMAN	JAK3	Tyrosine-protein kinase JAK3		25.6209	25.3975	25.4041	25.391	25.1946	25.2714	0.188482	0.948271
Q99808	S29A1_HUMAN	SLC29A1	Equilibrative nucleoside transporter 1		27.8682	27.8019	27.8324	27.7517	27.604	27.5826	0.188071	1.5351
P54253	ATX1_HUMAN	ATXN1	Ataxin-1		21.4676	21.5869	21.5117	21.1642	21.3752	21.4626	0.188071	0.923275
Q9UEG4	ZN629_HUMAN	ZNF629	Zinc finger protein 629		21.5823	21.5777	21.5545	21.3752	21.391	21.3857	0.187548	4.35888
Q96LT4	SAMD8_HUMAN	SAMD8	Sphingomyelin synthase-related protein 1		21.3538	21.6186	21.6453	21.2125	21.5165	21.3266	0.187336	0.660216
Q8N2Z9	CENPS_HUMAN	CENPS	Centromere protein S		20.4375	20.5915	20.265	20.5165	20.1079	20.1079	0.187211	0.492627
Q9Y2K7	KDM2A_HUMAN	KDM2A	Lysine-specific demethylase 2A		22.8576	22.7451	22.7077	22.6886	22.5093	22.5522	0.186762	1.2462
Q9HB63	NET4_HUMAN	NTN4	Netrin-4		22.4898	22.4298	22.5093	22.239	22.2535	22.3778	0.186213	1.68666
Q13438	OS9_HUMAN	OS9	Protein OS-9		25.5955	25.705	25.7619	25.3239	25.5492	25.632	0.185777	0.826121
Q9P2D0	IBTK_HUMAN	IBTK	Inhibitor of Bruton tyrosine kinase		22.5983	22.5451	22.4947	22.2961	22.4349	22.3511	0.185329	1.67736
Q8TEH3	DEN1A_HUMAN	DENND1A	DENN domain-containing protein 1A		18.4354	18.5739	18.6311	18.3462	18.5077	18.232	0.184794	0.869852
Q9NZJ9	NUDT4_HUMAN	NUDT4	Diphosphoinositol polyphosphate phosphohydrolase 2		26.0935	25.9869	26.1135	25.8019	25.7871	26.0505	0.184757	0.917452
Q8NBS9	TXND5_HUMAN	TXNDC5	Thioredoxin domain-containing protein 5		29.0243	29.3282	29.2979	28.8112	29.2535	29.0322	0.184504	0.503868
Q8IUQ4	SIAH1_HUMAN	SIAH1	E3 ubiquitin-protein ligase SIAH1		20.2302	20.1079	20.0691	19.6424	20.0292	20.1825	0.184357	0.476528
O75147	OBSL1_HUMAN	OBSL1	Obscurin-like protein 1		23.6096	23.4041	23.4676	23.3645	23.2821	23.2821	0.184219	1.2946
Q9UI15	TAGL3_HUMAN	TAGLN3	Transgelin-3		23.9134	24.002	23.6649	23.3778	24.2463	23.4041	0.184052	0.23974
P23229	ITA6_HUMAN	ITGA6	Integrin alpha-6		25.5492	25.0935	24.9539	25.3444	24.8288	24.8717	0.183905	0.30704
Q9NPE3	NOP10_HUMAN	NOP10	H/ACA ribonucleoprotein complex subunit 3		25.3342	25.4138	25.3943	25.2207	25.1604	25.2096	0.183865	2.42975
Q96JA1	LRIG1_HUMAN	LRIG1	Leucine-rich repeats and immunoglobulin-like domains protein 1		22.5045	22.239	22.58	22.2036	22.3592	22.2096	0.183723	0.730125
Q9BVJ7	DUS23_HUMAN	DUSP23	Dual specificity protein phosphatase 23		23.7594	23.7895	23.8385	23.6431	23.5285	23.6649	0.183636	1.72346
Q8TDN1	KCNG4_HUMAN	KCNG4	Potassium voltage-gated channel subfamily G member 4		20.5915	20.5261	20.9098	20.4375	20.654	20.3857	0.183379	0.564786
Q16611	BAK_HUMAN	BAK1	Bcl-2 homologous antagonist/killer		21.7715	22.0691	22.1143	21.7182	21.6714	22.0156	0.183216	0.529952
O15211	RGL2_HUMAN	RGL2	Ral guanine nucleotide dissociation stimulator-like 2		21.7056	21.7594	21.6096	21.4923	21.4923	21.5404	0.183216	1.76642
P23511	NFYA_HUMAN	NFYA	Nuclear transcription factor Y subunit alpha		22.741	22.7915	22.5961	22.5045	22.4947	22.58	0.183119	1.32892
Q9H7F4	T185B_HUMAN	TMEM185B	Transmembrane protein 185B		22.7995	22.5846	22.6736	22.5938	22.2989	22.6164	0.182856	0.69577
Q6P1K2	PMF1_HUMAN	PMF1	Polyamine-modulated factor 1		22.2905	21.9637	21.9916	22.1079	21.8269	21.7634	0.182535	0.54177
Q9HC38	GLOD4_HUMAN	GLOD4	Glyoxalase domain-containing protein 4		28.4746	28.5718	28.7031	28.3196	28.4314	28.4512	0.182423	1.10185
Q99747	SNAG_HUMAN	NAPG	Gamma-soluble NSF attachment protein		24.5638	24.5463	24.8044	24.002	24.5812	24.7846	0.182268	0.297215
Q9UHB4	NDOR1_HUMAN	NDOR1	NADPH-dependent diflavin oxidoreductase 1		22.3457	22.0459	22.0723	22.1426	21.8576	21.9171	0.182257	0.635534
P15954	COX7C_HUMAN	COX7C	Cytochrome c oxidase subunit 7C, mitochondrial		24.1253	24.1253	23.895	23.9225	23.8576	23.8191	0.182178	1.0373
Q9NPH3	IL1AP_HUMAN	IL1RAP	Interleukin-1 receptor accessory protein		22.7492	22.7876	22.882	22.5427	22.68	22.6497	0.182119	1.47216
Q8WUB8	PHF10_HUMAN	PHF10	PHD finger protein 10		23.0426	22.9441	23.1079	22.8557	22.7244	22.969	0.181862	1.00147
P49356	FNTB_HUMAN	FNTB	Protein farnesyltransferase subunit beta		23.7286	23.9672	23.7895	23.6209	23.654	23.6649	0.181833	1.17455
Q9NUP9	LIN7C_HUMAN	LIN7C	Protein lin-7 homolog C		24.4614	24.5522	24.4923	24.2096	24.2961	24.4551	0.181668	1.114
P54252	ATX3_HUMAN	ATXN3	Ataxin-3		23.0559	23.1581	22.9951	22.9134	22.8249	22.9261	0.181515	1.47111
Q8N5L8	RP25L_HUMAN	RPP25L	Ribonuclease P protein subunit p25-like protein		23.5522	23.4425	23.4425	23.2051	23.3376	23.3511	0.181154	1.42407
P00395	COX1_HUMAN	MT-CO1	Cytochrome c oxidase subunit 1		25.3578	25.2996	25.0359	24.9043	25.2785	24.9672	0.181133	0.522732
Q9HBH7	BEX1_HUMAN	BEX1	Protein BEX1		23.3376	22.882	22.8191	23.2185	22.7655	22.5117	0.181018	0.275901
P51797	CLCN6_HUMAN	CLCN6	H(+)/Cl(-) exchange transporter 6		20.8034	21.1079	21.2006	20.6006	21.0156	20.953	0.180876	0.440216
Q96GY0	ZC21A_HUMAN	ZC2HC1A	Zinc finger C2HC domain-containing protein 1A		23.5404	23.391	23.48	23.391	23.1961	23.2821	0.180738	1.19406
Q9UIG8	SO3A1_HUMAN	SLCO3A1	Solute carrier organic anion transporter family member 3A1		20.4775	20.5356	20.3752	20.3645	20.2877	20.1946	0.180503	1.24762
Q12797	ASPH_HUMAN	ASPH	Aspartyl/asparaginyl beta-hydroxylase		26.5478	27.0296	26.9869	26.4073	26.7771	26.8385	0.18046	0.369064
Q9C0C7	AMRA1_HUMAN	AMBRA1	Activating molecule in BECN1-regulated autophagy protein 1		24.6431	24.1332	24.3511	24.2463	24.2891	24.0526	0.179801	0.473414
Q9UHR6	ZNHI2_HUMAN	ZNHIT2	Zinc finger HIT domain-containing protein 2		22.391	22.1673	22.0559	22.1886	21.9812	21.9061	0.179439	0.621661
Q8WVF5	KCTD4_HUMAN	KCTD4	BTB/POZ domain-containing protein KCTD4		19.8231	19.526	19.5482	19.4044	19.5882	19.3666	0.179333	0.695212
Q9H4G4	GAPR1_HUMAN	GLIPR2	Golgi-associated plant pathogenesis-related protein 1		23.6757	24.0935	23.9316	23.7796	23.6757	23.7077	0.179262	0.64566
P63279	UBC9_HUMAN	UBE2I	SUMO-conjugating enzyme UBC9		27.3828	27.3662	27.3066	27.1984	27.1214	27.1984	0.179161	2.18215
P08651	NFIC_HUMAN	NFIC	Nuclear factor 1 C-type		25.6237	25.7312	25.6811	25.5638	25.4457	25.4892	0.179063	1.74024
Q8NDH3	PEPL1_HUMAN	NPEPL1	Probable aminopeptidase NPEPL1		22.3619	22.6074	22.632	22.1734	22.4923	22.3988	0.178902	0.629166
Q02833	RASF7_HUMAN	RASSF7	Ras association domain-containing protein 7		17.2609	18.3018	17.9151	17.9487	17.1747	17.8191	0.17839	0.174851
P02771	FETA_HUMAN	AFP	Alpha-fetoprotein		22.8576	21.1581	22.1612	22.0393	21.5498	22.0526	0.178385	0.125547
Q4G0I0	UQCC4_HUMAN	UQCC4	Ubiquinol-cytochrome c reductase complex assembly factor 4		18.7141	19.9018	19.4466	18.8747	19.6797	18.9741	0.178031	0.155314
S4R3C0	S4R3C0_HUMAN	IGHV3OR16-17	Immunoglobulin heavy variable 3/OR16-17 (non-functional) (Fragment)		20.5356	21.4375	20.3321	20.68	20.7056	20.3857	0.177956	0.192241
O75771	RA51D_HUMAN	RAD51D	DNA repair protein RAD51 homolog 4		15.6826	15.5253	15.4338	15.8858	15.0722	15.1501	0.177904	0.263758
Q9P0U4	CXXC1_HUMAN	CXXC1	CXXC-type zinc finger protein 1		24.6757	24.654	24.5869	24.3778	24.4362	24.5696	0.177675	1.32541
Q86XK3	SFR1_HUMAN	SFR1	Swi5-dependent recombination DNA repair protein 1 homolog		19.6599	19.6926	19.1542	19.6566	18.9564	19.3608	0.17766	0.265284
Q9UJY1	HSPB8_HUMAN	HSPB8	Heat shock protein beta-8		23.8093	23.7695	23.7796	23.6209	23.5404	23.6649	0.177407	2.00636
P49593	PPM1F_HUMAN	PPM1F	Protein phosphatase 1F		24.9716	24.9977	24.9933	24.7441	24.8433	24.8433	0.177334	2.18909
Q9NTM9	CUTC_HUMAN	CUTC	Copper homeostasis protein cutC homolog		22.8651	23.0409	22.937	22.7244	22.9024	22.6843	0.177292	0.98669
Q7Z2K8	GRIN1_HUMAN	GPRIN1	G protein-regulated inducer of neurite outgrowth 1		20.0292	19.7575	19.9124	19.708	19.7753	19.6841	0.177233	0.998144
Q7Z6B0	CCD91_HUMAN	CCDC91	Coiled-coil domain-containing protein 91		25.2317	25.2207	25.0148	24.7796	24.8191	25.3376	0.176973	0.385836
P36897	TGFR1_HUMAN	TGFBR1	TGF-beta receptor type-1		22.0756	21.8651	21.9951	21.895	21.8576	21.654	0.176394	0.846392
O95139	NDUB6_HUMAN	NDUFB6	NADH dehydrogenase [ubiquinone] 1 beta subcomplex subunit 6		25.6292	25.7415	25.6622	25.7155	25.391	25.3975	0.176281	0.718616
O95084	PRS23_HUMAN	PRSS23	Serine protease 23		26.604	26.4938	26.673	26.2463	26.3926	26.604	0.17598	0.689275
Q8IUH3	RBM45_HUMAN	RBM45	RNA-binding protein 45		22.3592	22.4775	22.4015	22.3156	22.2243	22.1704	0.175948	1.48873
Q6NSJ5	LRC8E_HUMAN	LRRC8E	Volume-regulated anion channel subunit LRRC8E		24.6264	24.2535	24.3444	24.002	24.3778	24.317	0.175838	0.470807
P85037	FOXK1_HUMAN	FOXK1	Forkhead box protein K1		24.4105	24.4362	24.5045	24.2317	24.2891	24.3031	0.175749	2.10854
O94907	DKK1_HUMAN	DKK1	Dickkopf-related protein 1		23.7389	23.2521	23.5638	23.5404	23.1095	23.3778	0.175708	0.390235
Q96DX7	TRI44_HUMAN	TRIM44	Tripartite motif-containing protein 44		23.2361	22.0258	22.7975	22.7013	22.1704	22.6606	0.1757	0.168916
A8MTL9	HMSD_HUMAN	HMSD	Serpin-like protein HMSD		18.4743	18.6999	18.3601	18.3277	18.5762	18.1034	0.17568	0.446538
Q96JK2	DCAF5_HUMAN	DCAF5	DDB1- and CUL4-associated factor 5		20.8191	20.9388	20.8423	20.7056	20.7223	20.6453	0.175663	1.80691
Q02078	MEF2A_HUMAN	MEF2A	Myocyte-specific enhancer factor 2A		23.2961	23.2258	23.4041	23.0037	23.2302	23.1658	0.175452	0.966554
P78310	CXAR_HUMAN	CXADR	Coxsackievirus and adenovirus receptor		21.3962	21.3484	20.9882	20.8876	21.6141	20.7056	0.175155	0.223555
Q9BRQ0	PYGO2_HUMAN	PYGO2	Pygopus homolog 2		22.8802	22.9352	23.0241	22.7286	22.8073	22.7796	0.174653	1.6618
Q9Y4K3	TRAF6_HUMAN	TRAF6	TNF receptor-associated factor 6		25.5345	25.7745	25.7466	25.5315	25.673	25.3273	0.1746	0.624613
O95352	ATG7_HUMAN	ATG7	Ubiquitin-like modifier-activating enzyme ATG7		24.6264	24.3975	24.9043	24.5225	24.5045	24.3778	0.17448	0.496333
P53801	PTTG_HUMAN	PTTG1IP	Pituitary tumor-transforming gene 1 protein-interacting protein		26.4614	26.4394	26.4831	26.3545	26.3342	26.1719	0.174442	1.37695
O75431	MTX2_HUMAN	MTX2	Metaxin-2		24.8336	24.8528	24.7695	24.6865	24.5983	24.6486	0.174209	2.08141
Q8IWD4	CC117_HUMAN	CCDC117	Coiled-coil domain-containing protein 117		20.8423	20.9098	20.85	20.8346	20.6096	20.6364	0.173777	1.10304
Q9UBQ7	GRHPR_HUMAN	GRHPR	Glyoxylate reductase/hydroxypyruvate reductase		26.1015	26.2188	26.1527	25.9517	25.9738	26.0275	0.173333	1.88245
Q9UP38	FZD1_HUMAN	FZD1	Frizzled-1		21.8423	22.0526	22.1047	21.7265	22.0224	21.7307	0.173333	0.61475
O43854	EDIL3_HUMAN	EDIL3	EGF-like repeat and discoidin I-like domain-containing protein 3		26.6865	26.6181	26.7517	26.4614	26.4298	26.6458	0.173083	1.04745
Q2M1Z3	RHG31_HUMAN	ARHGAP31	Rho GTPase-activating protein 31		25.976	26.1214	26.2408	25.8361	25.9517	26.0317	0.172901	0.841759
P23352	KALM_HUMAN	ANOS1	Anosmin-1		21.4972	21.6497	21.8802	21.5356	21.4324	21.5404	0.172867	0.671881
Q15714	T22D1_HUMAN	TSC22D1	TSC22 domain family protein 1		24.7695	25.4488	25.228	24.9495	24.8811	25.0975	0.17277	0.340168
O43462	MBTP2_HUMAN	MBTPS2	Membrane-bound transcription factor site-2 protease		22.9654	23.0756	23.0325	22.9152	22.8307	22.8093	0.172763	1.71667
Q7RTN6	STRAA_HUMAN	STRADA	STE20-related kinase adapter protein alpha		21.9951	22.0325	22.0983	21.9243	21.823	21.8614	0.172406	1.82225
Q9H6K1	ILRUN_HUMAN	ILRUN	Protein ILRUN		24.4298	24.275	23.9134	23.867	23.8764	24.3578	0.172309	0.316419
P51617	IRAK1_HUMAN	IRAK1	Interleukin-1 receptor-associated kinase 1		22.4015	22.2273	22.2535	22.1704	22.1269	22.0691	0.171966	1.30687
O95633	FSTL3_HUMAN	FSTL3	Follistatin-related protein 3		21.2477	21.1519	21.2066	21.002	20.8651	21.2243	0.17158	0.725244
P13866	SC5A1_HUMAN	SLC5A1	Sodium/glucose cotransporter 1		19.9601	21.5309	20.0426	20.8269	20.3538	19.8384	0.171501	0.10574
Q9P2P6	STAR9_HUMAN	STARD9	StAR-related lipid transfer protein 9		24.9134	24.8288	25.0484	24.6486	24.6971	24.9316	0.171144	0.723233
Q9NUM4	T106B_HUMAN	TMEM106B	Transmembrane protein 106B		26.726	26.632	26.6865	26.604	26.4831	26.4441	0.171087	1.43825
Q6PL18	ATAD2_HUMAN	ATAD2	ATPase family AAA domain-containing protein 2		21.2006	20.4476	20.343	21.1886	20.1946	20.0951	0.170977	0.143737
P15260	INGR1_HUMAN	IFNGR1	Interferon gamma receptor 1		21.4726	21.2877	21.1015	21.3045	21.0359	21.0088	0.170851	0.526506
Q9HAF1	EAF6_HUMAN	MEAF6	Chromatin modification-related protein MEAF6		22.417	22.3805	22.3936	22.2821	22.3017	22.0951	0.17074	1.20279
Q9Y547	IFT25_HUMAN	IFT25	Intraflagellar transport protein 25 homolog		26.2696	26.2058	26.0317	26.0505	25.9517	25.9933	0.170533	1.0451
P62304	RUXE_HUMAN	SNRPE	Small nuclear ribonucleoprotein E		27.3239	27.189	27.1604	27.0711	27.0401	27.0505	0.170503	1.53516
P56557	TM50B_HUMAN	TMEM50B	Transmembrane protein 50B		22.4775	22.4196	22.6342	22.3211	22.3831	22.3156	0.17049	1.18452
Q9NS93	TM7S3_HUMAN	TM7SF3	Transmembrane 7 superfamily member 3		22.6736	22.4425	22.3936	22.4118	22.1673	22.4196	0.170343	0.642814
Q5VUJ6	LRCH2_HUMAN	LRCH2	Leucine-rich repeat and calponin homology domain-containing protein 2		20.3538	20.6886	20.3538	19.8627	20.5069	20.5165	0.170039	0.281193
O95528	GTR10_HUMAN	SLC2A10	Solute carrier family 2, facilitated glucose transporter member 10		21.9243	21.7223	21.895	21.2302	22.1015	21.7013	0.169554	0.260233
Q14135	VGLL4_HUMAN	VGLL4	Transcription cofactor vestigial-like protein 4		21.6971	21.895	21.6886	21.5069	21.502	21.7634	0.16946	0.705905
A0A0A0MT69	A0A0A0MT69_HUMAN	IGKJ4	Immunoglobulin kappa joining 4 (Fragment)		21.5261	22.2593	21.8034	21.9847	21.265	21.8307	0.169456	0.215334
O94967	WDR47_HUMAN	WDR47	WD repeat-containing protein 47		24.0526	24.0275	24.1642	23.8576	23.8858	23.9933	0.169209	1.34202
Q9Y3P9	RBGP1_HUMAN	RABGAP1	Rab GTPase-activating protein 1		24.1332	24.9134	24.1565	24.5105	24.2096	23.976	0.169044	0.220083
O60725	ICMT_HUMAN	ICMT	Protein-S-isoprenylcysteine O-methyltransferase		24.3511	24.275	24.2607	24.2679	24.0935	24.019	0.168812	1.00383
Q9UNQ0	ABCG2_HUMAN	ABCG2	Broad substrate specificity ATP-binding cassette transporter ABCG2		19.6379	19.3344	19.2692	19.2916	19.4659	18.9778	0.168742	0.38991
Q96PV7	F193B_HUMAN	FAM193B	Protein FAM193B		18.7329	18.6701	19.1196	18.8613	18.5362	18.62	0.168342	0.419457
P68402	PA1B2_HUMAN	PAFAH1B2	Platelet-activating factor acetylhydrolase IB subunit alpha2		27.2803	27.17	27.3066	26.9316	27.141	27.1795	0.168264	0.894899
Q5JTW2	CEP78_HUMAN	CEP78	Centrosomal protein of 78 kDa		21.6051	21.1143	21.0493	21.5309	21.0886	20.6453	0.167963	0.209857
Q9HBW9	AGRL4_HUMAN	ADGRL4	Adhesion G protein-coupled receptor L4		23.0918	22.9812	22.9152	22.8365	22.8269	22.821	0.167946	1.50233
Q9Y6A1	POMT1_HUMAN	POMT1	Protein O-mannosyl-transferase 1		22.1143	22.2506	22.2792	21.8839	22.1143	22.1426	0.167787	0.804461
Q03188	CENPC_HUMAN	CENPC	Centromere protein C		23.6649	23.7492	23.6865	23.5404	23.5285	23.5285	0.167728	2.55287
Q9Y576	ASB1_HUMAN	ASB1	Ankyrin repeat and SOCS box protein 1		22.7307	22.417	22.5213	22.5356	22.2764	22.3538	0.167714	0.62917
P09619	PGFRB_HUMAN	PDGFRB	Platelet-derived growth factor receptor beta		26.7895	27.0914	27.17	26.6181	26.9539	26.976	0.167665	0.438785
Q9P0T4	ZN581_HUMAN	ZNF581	Zinc finger protein 581		18.6066	18.4085	18.5387	19.4264	17.8046	17.8222	0.166876	0.111793
O14578	CTRO_HUMAN	CIT	Citron Rho-interacting kinase		24.2821	23.0641	22.5915	24.2317	22.5498	22.6562	0.166663	0.0793049
Q8TE02	ELP5_HUMAN	ELP5	Elongator complex protein 5		22.1976	21.8113	21.7553	21.8034	21.743	21.7182	0.166527	0.517139
O95343	SIX3_HUMAN	SIX3	Homeobox protein SIX3		22.0658	22.0054	22.0054	21.7836	21.895	21.8987	0.166407	1.75092
P17535	JUND_HUMAN	JUND	Transcription factor JunD		23.5404	23.2821	23.3376	23.3645	23.1856	23.1111	0.166279	0.697046
Q29980	MICB_HUMAN	MICB	MHC class I polypeptide-related sequence B		23.0054	23.0376	22.8365	22.953	22.7796	22.6497	0.165745	0.701535
Q7L0J3	SV2A_HUMAN	SV2A	Synaptic vesicle glycoprotein 2A		23.9316	24.0443	23.8858	23.6971	23.8385	23.8288	0.165744	1.18863
Q9H1C7	CYTM1_HUMAN	CYSTM1	Cysteine-rich and transmembrane domain-containing protein 1		23.2961	23.2821	23.2521	23.1946	23.0935	23.0459	0.165422	1.64972
O60906	NSMA_HUMAN	SMPD2	Sphingomyelin phosphodiesterase 2		20.3321	20.002	20.5915	20.0292	20.1946	20.2066	0.165067	0.386299
Q15390	MTFR1_HUMAN	MTFR1	Mitochondrial fission regulator 1		21.265	21.1519	21.0088	21.1332	20.9024	20.895	0.165012	0.698167
Q3KQV9	UAP1L_HUMAN	UAP1L1	UDP-N-acetylhexosamine pyrophosphorylase-like protein 1		22.4996	22.3645	22.3101	21.9707	22.4041	22.3045	0.164975	0.506083
Q9HAT1	LMA1L_HUMAN	LMAN1L	Protein ERGIC-53-like		22.2961	19.5509	20.0821	19.1084	21.7348	20.5915	0.164817	0.0499179
Q9Y3B9	RRP15_HUMAN	RRP15	RRP15-like protein		23.5522	23.4676	23.48	23.4425	23.2821	23.2821	0.164373	1.29219
Q8IXK0	PHC2_HUMAN	PHC2	Polyhomeotic-like protein 2		24.2463	24.2535	24.1332	24.019	24.0443	24.0772	0.164139	1.744
Q13057	COASY_HUMAN	COASY	Bifunctional coenzyme A synthase		24.3307	24.2961	24.5285	24.2891	24.2021	24.1719	0.164095	0.954623
O14867	BACH1_HUMAN	BACH1	Transcription regulator protein BACH1		21.9024	21.7955	22.0054	21.714	21.7056	21.7915	0.164079	1.16054
Q86Y29	BAGE3_HUMAN	BAGE3	B melanoma antigen 3		18.2221	19.8126	18.4754	18.7275	18.8815	18.4092	0.163964	0.116288
Q8IXL6	FA20C_HUMAN	FAM20C	Extracellular serine/threonine protein kinase FAM20C		21.632	21.9707	21.8689	21.4874	21.8307	21.6628	0.163582	0.507745
Q9NYA1	SPHK1_HUMAN	SPHK1	Sphingosine kinase 1		23.976	23.7594	23.867	24.0691	23.6649	23.3778	0.16352	0.319025
Q8IZ52	CHSS2_HUMAN	CHPF	Chondroitin sulfate synthase 2		22.9261	23.1063	23.1316	22.7594	22.9847	22.9298	0.163415	0.806349
Q9H7Z3	NRDE2_HUMAN	NRDE2	Nuclear exosome regulator NRDE2		21.417	21.4972	21.6186	21.5823	21.2361	21.2243	0.163343	0.550973
Q9H9G7	AGO3_HUMAN	AGO3	Protein argonaute-3		21.3805	21.5915	21.6141	21.0493	21.5309	21.5165	0.163142	0.394092
P14927	QCR7_HUMAN	UQCRB	Cytochrome b-c1 complex subunit 7		25.8881	25.8694	25.8694	25.7363	25.6649	25.7363	0.163081	2.57019
Q04771	ACVR1_HUMAN	ACVR1	Activin receptor type-1		22.019	22.002	22.0658	21.8461	21.8385	21.9134	0.162923	2.22715
Q96P47	AGAP3_HUMAN	AGAP3	Arf-GAP with GTPase, ANK repeat and PH domain-containing protein 3		23.0641	23.1565	23.1749	22.8932	22.9882	23.0258	0.162821	1.44748
Q06413	MEF2C_HUMAN	MEF2C	Myocyte-specific enhancer factor 2C		22.7614	22.7655	22.7307	22.5309	22.6497	22.5892	0.162598	1.9709
O96015	DNAL4_HUMAN	DNAL4	Dynein axonemal light chain 4		20.5638	20.4375	20.7307	20.7634	20.2066	20.2764	0.161845	0.344427
Q8WV22	NSE1_HUMAN	NSMCE1	Non-structural maintenance of chromosomes element 1 homolog		23.119	23.0002	22.9477	22.9477	22.8346	22.7995	0.16173	1.12538
Q96FK6	WDR89_HUMAN	WDR89	WD repeat-containing protein 89		21.8385	21.4118	21.7056	21.5638	21.5165	21.391	0.161496	0.521005
P49207	RL34_HUMAN	RPL34	Large ribosomal subunit protein eL34		29.393	29.3766	29.3388	29.1337	29.21	29.2803	0.161487	1.63008
Q2M296	MTHSD_HUMAN	MTHFSD	Methenyltetrahydrofolate synthase domain-containing protein		21.895	22.0325	22.0292	21.5592	22.0493	21.8651	0.161063	0.464468
Q8N488	RYBP_HUMAN	RYBP	RING1 and YY1-binding protein		22.2877	22.5522	22.3592	22.1734	22.1673	22.3752	0.161054	0.703716
P51688	SPHM_HUMAN	SGSH	N-sulphoglucosamine sulphohydrolase		22.1856	22.5938	22.5404	22.1079	22.3778	22.3511	0.160963	0.449107
Q9UMR2	DD19B_HUMAN	DDX19B	ATP-dependent RNA helicase DDX19B		22.9933	22.4726	22.4576	22.2792	22.6029	22.5592	0.160767	0.32499
Q8N138	ORML3_HUMAN	ORMDL3	ORM1-like protein 3		22.714	22.9225	22.8746	22.6757	22.538	22.8152	0.160707	0.721652
A8K0Z3	WASH1_HUMAN	WASHC1	WASH complex subunit 1		25.5404	25.6403	25.7338	25.3239	25.632	25.4769	0.160545	0.696662
O43617	TPPC3_HUMAN	TRAPPC3	Trafficking protein particle complex subunit 3		24.918	24.8764	24.9361	24.7995	24.6703	24.7796	0.16037	1.66485
O75954	TSN9_HUMAN	TSPAN9	Tetraspanin-9		24.002	24.0691	24.2607	23.632	24.1253	24.0935	0.160307	0.379953
Q9UHK0	NUFP1_HUMAN	NUFIP1	FMR1-interacting protein NUFIP1		20.7307	20.5356	20.3321	20.7056	20.2419	20.1704	0.160191	0.323271
O60683	PEX10_HUMAN	PEX10	Peroxisome biogenesis factor 10		20.9098	20.5261	20.9388	20.4067	20.8423	20.6453	0.160142	0.36523
P35754	GLRX1_HUMAN	GLRX	Glutaredoxin-1		23.7895	23.9933	24.2021	23.8093	23.8288	23.867	0.159946	0.594477
Q13542	4EBP2_HUMAN	EIF4EBP2	Eukaryotic translation initiation factor 4E-binding protein 2		21.7098	21.9847	22.155	21.7553	21.8269	21.7876	0.159901	0.5371
Q5JVS0	HABP4_HUMAN	HABP4	Intracellular hyaluronan-binding protein 4		24.654	24.5165	24.604	24.4488	24.4105	24.4362	0.159662	1.72858
O75717	WDHD1_HUMAN	WDHD1	WD repeat and HMG-box DNA-binding protein 1		24.3376	23.6096	23.5983	24.2463	23.4425	23.3778	0.159636	0.161561
Q03405	UPAR_HUMAN	PLAUR	Urokinase plasminogen activator surface receptor		25.6891	25.5983	25.5926	25.4551	25.4266	25.5195	0.159599	1.73181
Q9ULV3	CIZ1_HUMAN	CIZ1	Cip1-interacting zinc finger protein		21.0625	21.0088	20.9812	21.002	20.7223	20.85	0.159419	0.881112
Q6PID6	TTC33_HUMAN	TTC33	Tetratricopeptide repeat protein 33		22.3239	22.3565	22.6431	22.2535	22.3017	22.2905	0.159228	0.709827
Q15527	SURF2_HUMAN	SURF2	Surfeit locus protein 2		21.6628	21.2477	21.4425	21.3045	21.2125	21.3592	0.158925	0.552945
Q9Y2R0	COA3_HUMAN	COA3	Cytochrome c oxidase assembly factor 3 homolog, mitochondrial		24.2891	24.4362	24.317	24.0609	24.1488	24.3578	0.158274	0.732943
Q92754	AP2C_HUMAN	TFAP2C	Transcription factor AP-2 gamma		21.1825	20.4375	20.7307	20.9171	20.5731	20.3857	0.158239	0.232857
Q9BRN9	TM2D3_HUMAN	TM2D3	TM2 domain-containing protein 3		22.6865	22.6929	22.5754	22.6141	22.3962	22.4701	0.158084	0.995465
Q6PJG2	MDEAS_HUMAN	MIDEAS	Mitotic deacetylase-associated SANT domain protein		22.2332	22.2535	22.1946	22.1363	22.0054	22.0658	0.157914	1.71761
Q9Y3D5	RT18C_HUMAN	MRPS18C	Small ribosomal subunit protein bS18m		24.3101	24.239	24.1795	24.0772	24.0526	24.1253	0.157801	1.65765
Q96B23	ARK2N_HUMAN	ARK2N	Protein ARK2N		22.6342	22.6164	22.6843	22.4874	22.4947	22.48	0.157604	2.79086
Q9BPX7	CG025_HUMAN	C7orf25	UPF0415 protein C7orf25		21.7634	21.8307	21.743	21.4874	21.6971	21.68	0.157571	1.02354
P51861	CDR1_HUMAN	CDR1	Cerebellar degeneration-related antigen 1		18.33	18.6241	20.5165	18.9165	18.5246	19.5571	0.157506	0.0738773
Q08170	SRSF4_HUMAN	SRSF4	Serine/arginine-rich splicing factor 4		24.8191	24.976	24.8858	24.3712	24.9803	24.8576	0.157245	0.339493
Q9UBY8	CLN8_HUMAN	CLN8	Protein CLN8		21.6714	21.7098	21.9637	21.4118	21.8839	21.5777	0.157132	0.400977
Q9H3C7	GGNB2_HUMAN	GGNBP2	Gametogenetin-binding protein 2		23.9495	23.7594	23.7796	23.7895	23.3511	23.8764	0.15712	0.380803
P37802	TAGL2_HUMAN	TAGLN2	Transgelin-2		30.5933	30.6964	30.7373	30.4234	30.5664	30.5664	0.156973	1.15209
Q9H5N1	RABE2_HUMAN	RABEP2	Rab GTPase-binding effector protein 2		23.4298	23.1976	24.019	23.5404	23.2185	23.417	0.156877	0.235547
P01111	RASN_HUMAN	NRAS	GTPase NRas		25.7517	25.8019	25.9738	25.6181	25.726	25.7129	0.156825	0.975417
P09669	COX6C_HUMAN	COX6C	Cytochrome c oxidase subunit 6C		27.9484	27.9814	27.8324	27.8081	27.7708	27.7129	0.156814	1.38134
Q6ZN55	ZN574_HUMAN	ZNF574	Zinc finger protein 574		21.9601	21.8152	21.7675	21.6929	21.6453	21.7348	0.156635	1.16108
Q96C11	FGGY_HUMAN	FGGY	FGGY carbohydrate kinase domain-containing protein		21.002	20.8034	19.5375	19.6001	20.4775	20.7955	0.156576	0.0963418
Q460N3	PAR15_HUMAN	PARP15	Protein mono-ADP-ribosyltransferase PARP15		19.3418	17.444	17.9698	17.37	17.494	19.4223	0.156414	0.0622529
P15144	AMPN_HUMAN	ANPEP	Aminopeptidase N		24.895	25.0567	24.9847	24.7389	24.8336	24.895	0.156279	1.12751
Q15003	CND2_HUMAN	NCAPH	Condensin complex subunit 2		25.3943	25.1332	24.9803	25.2133	24.8764	24.9495	0.156207	0.420549
P56270	MAZ_HUMAN	MAZ	Myc-associated zinc finger protein		22.4923	22.3073	22.2419	22.3672	22.0789	22.1269	0.156169	0.599988
Q9H5V9	STEEP_HUMAN	STEEP1	STING ER exit protein		24.275	24.0691	23.9406	24.1015	23.8764	23.8385	0.156076	0.541115
Q96BU1	S1PBP_HUMAN	S100PBP	S100P-binding protein		19.8361	19.9601	19.9459	19.9742	19.4844	19.8155	0.156019	0.448983
O95214	LERL1_HUMAN	LEPROTL1	Leptin receptor overlapping transcript-like 1		23.0542	23.0999	23.0173	23.1472	22.8614	22.695	0.155959	0.508887
P15735	PHKG2_HUMAN	PHKG2	Phosphorylase b kinase gamma catalytic chain, liver/testis isoform		23.6649	23.6865	23.5404	23.5165	23.5165	23.391	0.155898	1.18522
O95466	FMNL1_HUMAN	FMNL1	Formin-like protein 1		20.5261	20.343	20.4775	20.3321	20.3645	20.1825	0.155828	0.929379
Q9BSB4	ATGA1_HUMAN	ATG101	Autophagy-related protein 101		23.4298	23.3101	23.3376	23.141	23.3778	23.0918	0.15559	0.74883
Q7L7V1	DHX32_HUMAN	DHX32	Putative pre-mRNA-splicing factor ATP-dependent RNA helicase DHX32		21.4726	21.2361	21.2593	21.2419	21.0951	21.1642	0.155573	0.83527
Q6JEL2	KLH10_HUMAN	KLHL10	Kelch-like protein 10		22.867	21.2593	22.7119	22.3073	22.4015	21.6628	0.155551	0.0992344
Q96D70	R3HD4_HUMAN	R3HDM4	R3H domain-containing protein 4		19.9882	20.3752	20.2302	20.0559	20.0156	20.0559	0.155376	0.61351
Q8NEB9	PK3C3_HUMAN	PIK3C3	Phosphatidylinositol 3-kinase catalytic subunit type 3		24.604	23.3101	23.2961	23.1825	23.1642	24.3975	0.155305	0.0930639
Q9Y692	GMEB1_HUMAN	GMEB1	Glucocorticoid modulatory element-binding protein 1		22.2621	22.1426	22.2679	22.1174	22.0983	21.9916	0.155075	1.28547
Q8N5C7	DTWD1_HUMAN	DTWD1	tRNA-uridine aminocarboxypropyltransferase 1		19.3556	19.0199	18.9695	19.1058	18.7825	18.9924	0.154789	0.430395
O14817	TSN4_HUMAN	TSPAN4	Tetraspanin-4		25.3745	25.275	25.3376	25.1642	25.1719	25.1871	0.154623	2.18189
O43504	LTOR5_HUMAN	LAMTOR5	Ragulator complex protein LAMTOR5		23.654	23.7286	23.9933	23.8093	23.5045	23.5983	0.154622	0.492595
P46976	GLYG_HUMAN	GYG1	Glycogenin-1		25.8312	25.9111	25.8858	25.6998	25.7234	25.7415	0.154499	2.36579
Q9UDX5	MTFP1_HUMAN	MTFP1	Mitochondrial fission process protein 1		22.928	22.9548	22.821	22.8614	22.632	22.7471	0.154438	0.927684
Q9P2H5	UBP35_HUMAN	USP35	Ubiquitin carboxyl-terminal hydrolase 35		19.8006	19.9198	20.2877	19.7148	20.1332	19.6973	0.154261	0.307602
O95562	SFT2B_HUMAN	SFT2D2	Vesicle transport protein SFT2B		24.0526	23.8191	23.8191	23.848	23.632	23.7492	0.153842	0.703378
O75319	DUS11_HUMAN	DUSP11	RNA/RNP complex-1-interacting phosphatase		22.1734	21.8385	22.2821	22.1581	21.7512	21.9243	0.153428	0.358982
Q5JPI9	EFMT2_HUMAN	EEF1AKMT2	EEF1A lysine methyltransferase 2		23.654	23.5869	23.6209	23.5165	23.4425	23.4425	0.153411	2.0917
Q6WKZ4	RFIP1_HUMAN	RAB11FIP1	Rab11 family-interacting protein 1		21.9637	21.8307	22.155	21.8764	21.7594	21.8538	0.153275	0.693271
Q5T1C6	THEM4_HUMAN	THEM4	Acyl-coenzyme A thioesterase THEM4		20.5069	20.953	20.9243	20.6714	20.4576	20.7955	0.153235	0.366574
Q9NX74	DUS2L_HUMAN	DUS2	tRNA-dihydrouridine(20) synthase [NAD(P)+]-like		22.6231	22.4551	22.4526	22.4751	22.3129	22.2849	0.152681	0.868053
Q9Y2H1	ST38L_HUMAN	STK38L	Serine/threonine-protein kinase 38-like		24.317	24.2679	24.5105	24.0359	24.2243	24.3778	0.152426	0.545449
Q96RS0	TGS1_HUMAN	TGS1	Trimethylguanosine synthase		22.1143	22.0625	21.9637	22.0983	21.8461	21.7389	0.152363	0.59023
Q9GZQ8	MLP3B_HUMAN	MAP1LC3B	Microtubule-associated proteins 1A/1B light chain 3B		26.8385	26.604	26.5754	26.604	26.4105	26.5463	0.152355	0.685146
O95164	UBL3_HUMAN	UBL3	Ubiquitin-like protein 3		20.1946	20.1825	20.3752	20.0559	20.1704	20.0691	0.152328	0.991618
Q96PU5	NED4L_HUMAN	NEDD4L	E3 ubiquitin-protein ligase NEDD4-like		24.5105	24.275	24.3307	24.3778	24.1174	24.1642	0.152245	0.641563
P10586	PTPRF_HUMAN	PTPRF	Receptor-type tyrosine-protein phosphatase F		23.7077	23.3239	23.4425	23.5638	23.1719	23.2821	0.152101	0.394755
P21266	GSTM3_HUMAN	GSTM3	Glutathione S-transferase Mu 3		25.4041	25.654	25.5754	25.341	25.3811	25.4551	0.152098	0.873861
Q96C00	ZBTB9_HUMAN	ZBTB9	Zinc finger and BTB domain-containing protein 9		20.6714	20.5165	20.4775	20.4375	20.265	20.5069	0.152051	0.749731
O94762	RECQ5_HUMAN	RECQL5	ATP-dependent DNA helicase Q5		22.3376	22.5309	22.3645	22.1174	21.9882	22.6714	0.15199	0.280455
Q7Z5R6	AB1IP_HUMAN	APBB1IP	Amyloid beta A4 precursor protein-binding family B member 1-interacting protein		21.9847	21.6971	21.7675	21.7098	21.7013	21.5823	0.151942	0.725779
Q4L180	FIL1L_HUMAN	FILIP1L	Filamin A-interacting protein 1-like		22.3457	22.5189	22.5915	22.0983	22.3266	22.5754	0.151931	0.414627
P60520	GBRL2_HUMAN	GABARAPL2	Gamma-aminobutyric acid receptor-associated protein-like 2		26.6458	26.5492	26.6595	26.4425	26.3975	26.5595	0.151661	1.19926
Q7L592	NDUF7_HUMAN	NDUFAF7	Protein arginine methyltransferase NDUFAF7, mitochondrial		22.417	22.5662	22.3988	22.3211	22.3211	22.2849	0.151615	1.30652
Q15800	MSMO1_HUMAN	MSMO1	Methylsterol monooxygenase 1		24.918	24.4488	24.417	24.5345	24.3712	24.4234	0.151585	0.376416
Q96B45	BORC7_HUMAN	BORCS7	BLOC-1-related complex subunit 7		22.4947	22.8519	22.6051	22.6671	22.3857	22.4451	0.151273	0.483953
Q9Y2L9	LRCH1_HUMAN	LRCH1	Leucine-rich repeat and calponin homology domain-containing protein 1		21.3592	21.4576	21.9916	21.2302	21.2593	21.8651	0.151268	0.204732
P62491	RB11A_HUMAN	RAB11A	Ras-related protein Rab-11A		22.8171	22.4451	22.4874	22.6074	22.343	22.3457	0.151168	0.442472
Q9Y6B2	EID1_HUMAN	EID1	EP300-interacting inhibitor of differentiation 1		21.2185	20.9024	20.9951	21.1457	20.9812	20.5356	0.151137	0.299485
O75530	EED_HUMAN	EED	Polycomb protein EED		23.6096	23.2679	23.3239	23.5285	23.1871	23.0325	0.151087	0.346564
Q8N5I2	ARRD1_HUMAN	ARRDC1	Arrestin domain-containing protein 1		21.4676	21.3211	21.3484	21.4626	20.9171	21.3045	0.150978	0.376635
Q9HA65	TBC17_HUMAN	TBC1D17	TBC1 domain family member 17		26.0084	26.1871	25.9316	25.6784	26.0484	25.9473	0.15097	0.49152
Q9Y224	RTRAF_HUMAN	RTRAF	RNA transcription, translation and transport factor protein		26.4629	26.4186	26.4567	26.3153	26.2517	26.3187	0.150854	2.36835
Q8WV92	MITD1_HUMAN	MITD1	MIT domain-containing protein 1		22.6253	22.48	22.4298	22.4947	22.3211	22.2679	0.150482	0.768478
Q9NP58	ABCB6_HUMAN	ABCB6	ATP-binding cassette sub-family B member 6		22.7776	22.6253	22.8614	22.2155	22.6186	22.9795	0.150226	0.258619
O15243	OBRG_HUMAN	LEPROT	Leptin receptor gene-related protein		23.9672	24.3307	24.317	23.8385	24.1015	24.2243	0.150209	0.383842
A8MW92	P20L1_HUMAN	PHF20L1	PHD finger protein 20-like protein 1		20.7056	20.2419	20.7553	20.3538	20.6006	20.2989	0.149818	0.327853
O75815	BCAR3_HUMAN	BCAR3	Breast cancer anti-estrogen resistance protein 3		22.4775	21.8987	22.0592	22.3403	21.8385	21.8073	0.149796	0.24213
Q9NUJ1	ABHDA_HUMAN	ABHD10	Palmitoyl-protein thioesterase ABHD10, mitochondrial		25.5315	25.6918	25.2856	25.2353	25.4041	25.4202	0.14975	0.494506
P20290	BTF3_HUMAN	BTF3	Transcription factor BTF3		27.9088	27.7389	27.673	27.6865	27.6389	27.5463	0.149715	0.85455
Q96EB6	SIR1_HUMAN	SIRT1	NAD-dependent protein deacetylase sirtuin-1		23.2477	23.2535	23.2821	23.2125	23.0609	23.0609	0.149683	1.35427
Q7Z569	BRAP_HUMAN	BRAP	BRCA1-associated protein		24.7441	24.5926	24.5696	24.4676	24.5165	24.4738	0.149455	1.23507
Q9H3S5	PIGM_HUMAN	PIGM	GPI mannosyltransferase 1		18.9445	18.9282	19.1513	18.7903	18.9513	18.8356	0.148918	0.796917
Q5JS54	PSMG4_HUMAN	PSMG4	Proteasome assembly chaperone 4		22.3045	22.2679	22.4726	22.3266	22.2361	22.0359	0.148781	0.628821
Q15007	FL2D_HUMAN	WTAP	Pre-mRNA-splicing regulator WTAP		23.6096	23.5522	23.4923	23.4923	23.3645	23.3511	0.14872	1.24002
O94985	CSTN1_HUMAN	CLSTN1	Calsyntenin-1		21.7836	21.9882	21.9423	21.6497	21.9171	21.7013	0.148668	0.654971
P30084	ECHM_HUMAN	ECHS1	Enoyl-CoA hydratase, mitochondrial		27.509	27.6251	27.509	27.4073	27.4073	27.3828	0.148554	1.70277
Q68D20	PMS2L_HUMAN	PMS2CL	Protein PMS2CL		18.5361	18.55	18.6087	18.7753	18.4582	18.0161	0.148439	0.268345
Q15058	KIF14_HUMAN	KIF14	Kinesin-like protein KIF14		21.9707	21.2989	21.3484	21.7876	21.265	21.1206	0.148301	0.191826
P61326	MGN_HUMAN	MAGOH	Protein mago nashi homolog		23.632	23.7492	23.7286	23.48	23.6096	23.5754	0.148237	1.31009
O75414	NDK6_HUMAN	NME6	Nucleoside diphosphate kinase 6		21.7715	21.8385	21.8113	21.7955	21.6276	21.5545	0.147898	0.935127
Q8TB40	ABHD4_HUMAN	ABHD4	(Lyso)-N-acylphosphatidylethanolamine lipase		21.2361	21.1642	21.0951	20.9742	21.002	21.0756	0.147863	1.362
O14949	QCR8_HUMAN	UQCRQ	Cytochrome b-c1 complex subunit 8		25.9933	26.0955	26.1115	25.8336	25.9738	25.9495	0.147795	1.22022
Q3ZCQ8	TIM50_HUMAN	TIMM50	Mitochondrial import inner membrane translocase subunit TIM50		25.6568	25.6181	25.4583	25.4892	25.3712	25.4298	0.147621	0.993859
Q13099	IFT88_HUMAN	IFT88	Intraflagellar transport protein 88 homolog		22.743	22.9261	22.9864	22.6779	22.8423	22.6929	0.147523	0.75266
P35556	FBN2_HUMAN	FBN2	Fibrillin-2		22.5141	22.6671	22.7995	22.4898	22.5708	22.4775	0.147502	0.777163
Q9H981	ARP8_HUMAN	ACTR8	Actin-related protein 8		21.7995	21.6886	21.6409	21.7915	21.5685	21.3266	0.147421	0.445503
Q5TC84	OGRL1_HUMAN	OGFRL1	Opioid growth factor receptor-like protein 1		22.3266	21.9812	22.1488	22.002	22.1363	21.8764	0.147303	0.518111
Q9Y3C6	PPIL1_HUMAN	PPIL1	Peptidyl-prolyl cis-trans isomerase-like 1		25.9606	25.8741	25.7846	25.8717	25.7103	25.5955	0.147237	0.708524
Q9H1E5	TMX4_HUMAN	TMX4	Thioredoxin-related transmembrane protein 4		23.9584	24.5105	24.5404	23.9225	24.2679	24.3778	0.147018	0.249152
Q8TD43	TRPM4_HUMAN	TRPM4	Transient receptor potential cation channel subfamily M member 4		20.4874	21.0625	20.8802	20.5356	20.6276	20.8269	0.14666	0.315414
Q8N3S3	PHTF2_HUMAN	PHTF2	Protein PHTF2		18.6676	18.914	18.7062	18.8196	18.4305	18.598	0.146597	0.465466
Q9BZ72	PITM2_HUMAN	PITPNM2	Membrane-associated phosphatidylinositol transfer protein 2		22.0789	22.4298	22.4898	21.8802	22.417	22.265	0.145458	0.286691
Q9H237	PORCN_HUMAN	PORCN	Protein-serine O-palmitoleoyltransferase porcupine		22.0789	22.2679	22.1301	21.6096	22.2185	22.2125	0.145391	0.278814
P49005	DPOD2_HUMAN	POLD2	DNA polymerase delta subunit 2		24.2463	23.848	23.8385	24.2463	23.7594	23.4923	0.144945	0.218405
P48147	PPCE_HUMAN	PREP	Prolyl endopeptidase		25.7568	27.1795	27.2445	27.2535	26.9316	25.5609	0.144935	0.0714337
Q9NVH1	DJC11_HUMAN	DNAJC11	DnaJ homolog subfamily C member 11		24.5285	24.5345	24.391	24.3444	24.3239	24.3511	0.144871	1.41805
P82664	RT10_HUMAN	MRPS10	Small ribosomal subunit protein uS10m		24.2607	24.2821	24.2096	24.2243	24.1174	23.976	0.144854	0.899909
Q9NZL4	HPBP1_HUMAN	HSPBP1	Hsp70-binding protein 1		25.1984	25.0148	25.0401	24.9933	24.8717	24.9539	0.144738	1.00305
Q9UM73	ALK_HUMAN	ALK	ALK tyrosine kinase receptor		21.2302	21.2764	21.3045	21.0559	21.2989	21.0224	0.144629	0.738757
Q9Y5R8	TPPC1_HUMAN	TRAPPC1	Trafficking protein particle complex subunit 1		25.7695	25.7415	25.797	25.6838	25.5783	25.6125	0.144485	1.83987
Q15836	VAMP3_HUMAN	VAMP3	Vesicle-associated membrane protein 3		26.1795	26.204	26.1871	25.9847	26.0732	26.0793	0.144468	1.9985
Q659A1	ICE2_HUMAN	ICE2	Little elongation complex subunit 2		20.8034	20.9672	20.4576	20.8113	20.6628	20.3211	0.14436	0.277838
Q8TCA0	LRC20_HUMAN	LRRC20	Leucine-rich repeat-containing protein 20		24.4676	24.654	24.391	24.5045	24.3444	24.2317	0.144052	0.577023
O75843	AP1G2_HUMAN	AP1G2	AP-1 complex subunit gamma-like 2		20.1332	19.3122	19.5701	19.5974	19.52	19.4667	0.14382	0.229701
O75167	PHAR2_HUMAN	PHACTR2	Phosphatase and actin regulator 2		23.5285	23.4298	23.417	23.4298	23.2185	23.2961	0.143636	0.94552
Q9ULG6	CCPG1_HUMAN	CCPG1	Cell cycle progression protein 1		24.5225	24.8093	24.7995	24.2821	24.7594	24.6595	0.143455	0.343116
O43169	CYB5B_HUMAN	CYB5B	Cytochrome b5 type B		26.3844	26.3811	26.425	26.3324	26.0995	26.329	0.143206	0.848713
O43765	SGTA_HUMAN	SGTA	Small glutamine-rich tetratricopeptide repeat-containing protein alpha		25.9847	25.9606	25.9628	25.902	25.7745	25.8019	0.143201	1.65337
Q8WYN0	ATG4A_HUMAN	ATG4A	Cysteine protease ATG4A		23.155	22.9654	22.8073	22.8269	22.9513	22.7203	0.143124	0.521234
Q14004	CDK13_HUMAN	CDK13	Cyclin-dependent kinase 13		22.6606	22.6387	22.6074	22.5708	22.5045	22.4041	0.142433	1.31153
Q8TF01	PNISR_HUMAN	PNISR	Arginine/serine-rich protein PNISR		23.0886	22.8932	22.9829	22.743	22.8595	22.9352	0.142356	0.830823
Q14296	FASTK_HUMAN	FASTK	Fas-activated serine/threonine kinase		23.1565	23.3239	23.2214	22.895	23.1719	23.2081	0.142278	0.574647
Q9P0B6	CC167_HUMAN	CCDC167	Coiled-coil domain-containing protein 167		23.7895	23.8093	23.8858	23.6431	23.6865	23.7286	0.142175	1.6842
Q9UKD1	GMEB2_HUMAN	GMEB2	Glucocorticoid modulatory element-binding protein 2		21.6096	21.4273	21.2707	21.3962	21.1642	21.3211	0.142003	0.522605
P61160	ARP2_HUMAN	ACTR2	Actin-related protein 2		28.4194	28.4746	28.4234	28.4032	28.3282	28.1604	0.141876	0.894469
P48047	ATPO_HUMAN	ATP5PO	ATP synthase subunit O, mitochondrial		27.0609	27.0914	27.019	26.8504	26.9316	26.965	0.141444	1.61917
Q9P2K9	DISP3_HUMAN	DISP3	Protein dispatched homolog 3		21.3321	20.9098	21.6051	21.3645	21.2707	20.7876	0.141401	0.201986
P78330	SERB_HUMAN	PSPH	Phosphoserine phosphatase		24.9847	25.3679	25.3877	24.8433	25.2785	25.1946	0.141291	0.308023
P08195	4F2_HUMAN	SLC3A2	Amino acid transporter heavy chain SLC3A2		27.1984	27.1984	27.3494	27.0914	27.0609	27.17	0.141288	1.1086
Q86V97	KBTB6_HUMAN	KBTBD6	Kelch repeat and BTB domain-containing protein 6		19.2802	19.1551	19.0892	19.3189	18.7719	19.0101	0.141176	0.348821
Q96RU2	UBP28_HUMAN	USP28	Ubiquitin carboxyl-terminal hydrolase 28		21.6276	21.9243	21.5309	21.8423	21.4526	21.3645	0.141112	0.304625
P42330	AK1C3_HUMAN	AKR1C3	Aldo-keto reductase family 1 member C3		20.6628	21.4526	21.4067	20.4676	21.3211	21.3101	0.141064	0.136554
Q9Y6B6	SAR1B_HUMAN	SAR1B	Small COPII coat GTPase SAR1B		26.189	26.0914	26.143	25.9066	25.8881	26.2058	0.140964	0.589769
Q8NG68	TTL_HUMAN	TTL	Tubulin--tyrosine ligase		23.4551	23.3239	23.2961	23.3511	23.1111	23.1901	0.140961	0.75339
P37268	FDFT_HUMAN	FDFT1	Squalene synthase		25.1871	24.5754	24.4923	25.0443	24.4298	24.3578	0.140951	0.17272
Q15067	ACOX1_HUMAN	ACOX1	Peroxisomal acyl-coenzyme A oxidase 1		25.2926	25.0443	25.1871	25.0894	25.0317	24.9803	0.14084	0.831271
Q9H892	TTC12_HUMAN	TTC12	Tetratricopeptide repeat protein 12		19.7936	19.4779	19.4845	19.6331	19.693	19.0088	0.140312	0.226542
Q9BU02	THTPA_HUMAN	THTPA	Thiamine-triphosphatase		22.0258	22.0918	22.1301	21.928	21.9637	21.9352	0.140304	1.91101
P50479	PDLI4_HUMAN	PDLIM4	PDZ and LIM domain protein 4		26.5404	26.5696	26.604	26.2679	26.5105	26.515	0.140209	0.771629
Q86V85	GP180_HUMAN	GPR180	Integral membrane protein GPR180		22.5333	22.6029	22.6209	22.3619	22.4898	22.4849	0.140125	1.32102
Q8N2G6	ZCH24_HUMAN	ZCCHC24	Zinc finger CCHC domain-containing protein 24		22.2332	22.4118	22.4701	21.8876	22.4947	22.3129	0.139964	0.29285
Q8NHG8	ZNRF2_HUMAN	ZNRF2	E3 ubiquitin-protein ligase ZNRF2		19.3559	19.6008	19.7331	19.4761	19.5676	19.2267	0.139801	0.392633
Q6UXH8	CCBE1_HUMAN	CCBE1	Collagen and calcium-binding EGF domain-containing protein 1		21.7796	21.2707	21.2989	21.6628	21.2185	21.0493	0.139582	0.220847
Q8NI37	PPTC7_HUMAN	PPTC7	Protein phosphatase PTC7 homolog		21.7995	21.7389	21.5165	21.5731	21.4626	21.6006	0.139524	0.659628
Q96Q05	TPPC9_HUMAN	TRAPPC9	Trafficking protein particle complex subunit 9		22.1519	22.265	22.0789	22.0325	22.019	22.0258	0.139461	1.2074
O15504	NUP42_HUMAN	NUP42	Nucleoporin NUP42		21.9742	22.1946	22.1079	21.9847	21.953	21.9207	0.139423	0.979535
Q96SY0	INT14_HUMAN	INTS14	Integrator complex subunit 14		23.2066	23.2419	23.2679	23.0376	23.0691	23.1916	0.139362	1.30037
P13010	XRCC5_HUMAN	XRCC5	X-ray repair cross-complementing protein 5		28.5278	28.4629	28.4234	28.3578	28.3023	28.3367	0.13911	1.80577
P03915	NU5M_HUMAN	MT-ND5	NADH-ubiquinone oxidoreductase chain 5		25.019	25.0732	24.9088	24.895	24.9043	24.7846	0.139058	1.0578
Q8N6Y2	LRC17_HUMAN	LRRC17	Leucine-rich repeat-containing protein 17		24.2821	24.4676	24.5522	24.0359	24.3444	24.5045	0.139043	0.365405
Q86VU5	CMTD1_HUMAN	COMTD1	Catechol O-methyltransferase domain-containing protein 1		22.1426	22.2621	22.1457	22.0625	22.0723	21.9985	0.139011	1.41803
P34910	EVI2B_HUMAN	EVI2B	Protein EVI2B		20.0691	19.9601	20.0426	20.0156	19.773	19.8662	0.138985	0.826882
P78539	SRPX_HUMAN	SRPX	Sushi repeat-containing protein SRPX		19.9135	19.7292	19.8232	19.5358	19.7025	19.8109	0.138882	0.653991
P25685	DNJB1_HUMAN	DNAJB1	DnaJ homolog subfamily B member 1		25.8552	25.8647	25.8361	25.8312	25.6486	25.6595	0.13888	1.09289
Q12907	LMAN2_HUMAN	LMAN2	Vesicular integral-membrane protein VIP36		27.2891	27.2625	27.3324	26.9539	27.2979	27.217	0.138418	0.583491
O95857	TSN13_HUMAN	TSPAN13	Tetraspanin-13		23.2679	23.2419	23.1348	23.0838	23.1047	23.0409	0.138385	1.43503
P46779	RL28_HUMAN	RPL28	Large ribosomal subunit protein eL28		29.141	29.2935	29.1842	29.0788	28.9896	29.1361	0.138098	1.04171
P27635	RL10_HUMAN	RPL10	Large ribosomal subunit protein uL16		29.3174	29.2512	29.2736	29.2077	29.1214	29.099	0.13808	1.6406
O60613	SEP15_HUMAN	SELENOF	Selenoprotein F		23.48	23.7389	23.632	23.3239	23.6209	23.4923	0.137966	0.532438
P07902	GALT_HUMAN	GALT	Galactose-1-phosphate uridylyltransferase		22.0258	21.9847	22.0325	21.7265	21.8876	22.0156	0.137757	0.744008
Q9Y3A2	UTP11_HUMAN	UTP11	Probable U3 small nucleolar RNA-associated protein 11		24.0854	23.976	23.9495	24.0609	23.8191	23.7182	0.137573	0.554924
Q8WUH2	TGFA1_HUMAN	TGFBRAP1	Transforming growth factor-beta receptor-associated protein 1		22.4526	22.4825	22.4247	22.1269	22.4015	22.4196	0.137284	0.644998
O14647	CHD2_HUMAN	CHD2	Chromodomain-helicase-DNA-binding protein 2		23.0443	23.1301	23.178	22.8969	22.9795	23.0641	0.137272	1.03759
Q96C36	P5CR2_HUMAN	PYCR2	Pyrroline-5-carboxylate reductase 2		26.189	26.2661	26.3712	26.1965	26.2077	26.0105	0.137174	0.760829
P47914	RL29_HUMAN	RPL29	Large ribosomal subunit protein eL29		29.2285	29.4512	29.2054	29.1652	28.8711	29.4374	0.137113	0.308378
Q5T0B9	ZN362_HUMAN	ZNF362	Zinc finger protein 362		20.6006	20.7955	20.7955	20.2764	20.654	20.85	0.137075	0.31005
Q9NYB0	TE2IP_HUMAN	TERF2IP	Telomeric repeat-binding factor 2-interacting protein 1		24.4488	24.4105	24.3975	24.3645	24.317	24.1642	0.137057	1.03218
P04818	TYSY_HUMAN	TYMS	Thymidylate synthase		25.4923	23.7695	23.7182	25.4892	23.6757	23.4041	0.136983	0.0538527
Q5JTV8	TOIP1_HUMAN	TOR1AIP1	Torsin-1A-interacting protein 1		25.895	26.0062	25.9539	25.8927	25.7846	25.767	0.13698	1.26606
Q6ZN04	MEX3B_HUMAN	MEX3B	RNA-binding protein MEX3B		21.8152	21.632	21.2302	21.6364	21.1825	21.4476	0.136957	0.249837
P10321	HLAC_HUMAN	HLA-C	HLA class I histocompatibility antigen, C alpha chain		26.6458	26.8504	26.7895	26.4362	26.726	26.7129	0.136897	0.537943
Q99973	TEP1_HUMAN	TEP1	Telomerase protein component 1		22.6693	22.7307	22.6606	22.4247	22.6453	22.58	0.136829	0.926184
Q86TG7	PEG10_HUMAN	PEG10	Retrotransposon-derived protein PEG10		23.1565	22.7955	22.7695	22.9584	22.6971	22.6562	0.136621	0.364006
Q9UBQ6	EXTL2_HUMAN	EXTL2	Exostosin-like 2		24.0526	24.1795	24.1488	23.8764	23.9933	24.1015	0.136538	0.840441
Q969S3	ZN622_HUMAN	ZNF622	Cytoplasmic 60S subunit biogenesis factor ZNF622		23.7389	23.7286	23.8576	23.5983	23.6096	23.7077	0.136479	1.18782
P08047	SP1_HUMAN	SP1	Transcription factor Sp1		23.3101	23.3376	23.3239	23.1504	23.2679	23.1441	0.136395	1.53412
P40425	PBX2_HUMAN	PBX2	Pre-B-cell leukemia transcription factor 2		21.7995	21.9423	21.9207	21.6757	21.654	21.9243	0.13614	0.629097
O43731	ERD23_HUMAN	KDELR3	ER lumen protein-retaining receptor 3		24.4234	24.5983	24.7846	24.1174	24.632	24.6486	0.136104	0.267953
Q96S44	PRPK_HUMAN	TP53RK	EKC/KEOPS complex subunit TP53RK		23.9043	23.8858	23.9316	23.9406	23.6971	23.6757	0.136068	0.724313
Q07812	BAX_HUMAN	BAX	Apoptosis regulator BAX		26.3679	26.4298	26.4441	26.2909	26.2821	26.2607	0.136052	2.25327
O96005	CLPT1_HUMAN	CLPTM1	Putative lipid scramblase CLPTM1		25.6784	25.6891	25.6486	25.5667	25.5404	25.5014	0.135853	2.41934
Q8TC12	RDH11_HUMAN	RDH11	Retinol dehydrogenase 11		25.4138	25.4862	25.417	25.3444	25.341	25.2243	0.135755	1.37833
Q6DKI1	RL7L_HUMAN	RPL7L1	Ribosomal protein uL30-like		25.0609	25.002	24.976	24.9933	24.8191	24.8191	0.135747	1.00652
Q6Y288	B3GLT_HUMAN	B3GLCT	Beta-1,3-glucosyltransferase		24.1015	24.2021	24.2891	23.9847	24.0443	24.1565	0.135742	0.852193
Q9UGN5	PARP2_HUMAN	PARP2	Poly [ADP-ribose] polymerase 2		20.6276	20.1457	19.9215	20.8346	20.2535	19.2	0.135548	0.0926647
O75569	PRKRA_HUMAN	PRKRA	Interferon-inducible double-stranded RNA-dependent protein kinase activator A		25.3545	25.4234	25.4488	25.2714	25.3066	25.2426	0.135359	1.79756
Q7Z422	SZRD1_HUMAN	SZRD1	SUZ RNA-binding domain-containing		26.3778	26.1719	26.3729	26.2714	26.1623	26.0833	0.135162	0.709135
Q9H6U8	ALG9_HUMAN	ALG9	Alpha-1,2-mannosyltransferase ALG9		25.3645	25.3679	25.3031	25.2096	25.1565	25.2643	0.135052	1.64138
Q6ZUX7	LHPL2_HUMAN	LHFPL2	LHFPL tetraspan subfamily member 2 protein		22.6409	22.8913	22.6431	22.3936	22.7512	22.6253	0.135023	0.43214
O00189	AP4M1_HUMAN	AP4M1	AP-4 complex subunit mu-1		22.1363	22.1488	22.1143	21.8727	22.0658	22.0559	0.135012	0.995678
P67809	YBOX1_HUMAN	YBX1	Y-box-binding protein 1		28.7771	28.6181	28.6005	28.6458	28.4512	28.4938	0.134918	0.761465
Q6P6C2	ALKB5_HUMAN	ALKBH5	RNA demethylase ALKBH5		23.1673	23.239	23.2821	23.1031	23.0241	23.1565	0.134871	1.24205
P84098	RL19_HUMAN	RPL19	Large ribosomal subunit protein eL19		29.7437	29.6075	29.7565	29.5646	29.4881	29.651	0.134734	0.940756
Q8IVL1	NAV2_HUMAN	NAV2	Neuron navigator 2		21.6843	21.1015	21.0951	21.3156	21.2593	20.9024	0.134527	0.224312
Q12980	NPRL3_HUMAN	NPRL3	GATOR1 complex protein NPRL3		22.0691	21.8307	21.9388	22.0292	21.6929	21.714	0.13419	0.448392
Q9Y3B6	EMC9_HUMAN	EMC9	ER membrane protein complex subunit 9		20.8576	20.4775	21.1143	20.8113	20.654	20.5823	0.133909	0.272606
O75884	RBBP9_HUMAN	RBBP9	Serine hydrolase RBBP9		24.4234	24.5345	24.6865	24.391	24.3975	24.4551	0.133553	0.780345
O95373	IPO7_HUMAN	IPO7	Importin-7		27.3745	27.4073	27.3494	27.4234	27.0813	27.2262	0.133436	0.593179
Q504Y3	ZCPW2_HUMAN	ZCWPW2	Zinc finger CW-type PWWP domain protein 2		18.8278	18.9475	19.0172	18.0779	19.1437	19.171	0.133326	0.135017
Q9HCP0	KC1G1_HUMAN	CSNK1G1	Casein kinase I isoform gamma-1		22.8034	22.8365	22.8538	22.695	22.6518	22.7471	0.133246	1.885
P51148	RAB5C_HUMAN	RAB5C	Ras-related protein Rab-5C		27.9372	27.9146	27.8916	27.7833	27.7895	27.7708	0.133229	3.13381
O75165	DJC13_HUMAN	DNAJC13	DnaJ homolog subfamily C member 13		26.0127	26.0874	24.2317	25.4073	26.2151	24.3101	0.13308	0.0560304
Q96S66	CLCC1_HUMAN	CLCC1	Chloride channel CLIC-like protein 1		23.2535	23.0886	23.0224	23.0292	23.1348	22.8014	0.133048	0.481981
O75161	NPHP4_HUMAN	NPHP4	Nephrocystin-4		24.6865	24.9043	24.4425	24.7129	24.6971	24.2243	0.132955	0.253069
Q9Y6I9	TX264_HUMAN	TEX264	Testis-expressed protein 264		24.1095	23.8288	23.9134	23.9672	23.6865	23.7995	0.132868	0.498186
Q86TM6	SYVN1_HUMAN	SYVN1	E3 ubiquitin-protein ligase synoviolin		24.3844	24.4041	24.4362	24.1795	24.3239	24.3239	0.132468	1.23349
Q13442	HAP28_HUMAN	PDAP1	28 kDa heat- and acid-stable phosphoprotein		27.632	27.6181	27.6181	27.5014	27.5463	27.4234	0.13234	1.66462
Q8IYS2	K2013_HUMAN	KIAA2013	Uncharacterized protein KIAA2013		24.4488	24.4676	24.5225	24.2679	24.3511	24.4234	0.132205	1.23946
P11171	EPB41_HUMAN	EPB41	Protein 4.1		23.6431	23.976	23.9672	23.1976	24.1253	23.867	0.132081	0.167571
A4D2B0	MBLC1_HUMAN	MBLAC1	Metallo-beta-lactamase domain-containing protein 1		20.8269	20.6453	20.7796	20.5356	20.5731	20.7471	0.131934	0.709818
Q8WWI5	CTL1_HUMAN	SLC44A1	Choline transporter-like protein 1		23.417	23.5983	23.632	23.4676	23.5165	23.2679	0.131775	0.580316
Q9BQD7	ANKMT_HUMAN	ANTKMT	Adenine nucleotide translocase lysine N-methyltransferase		18.3732	18.2037	17.7836	18.4475	17.3965	18.1212	0.131774	0.136389
Q53FP2	NACHO_HUMAN	TMEM35A	Novel acetylcholine receptor chaperone		23.0983	23.3376	23.3645	23.1063	23.2346	23.0641	0.131771	0.595676
Q13485	SMAD4_HUMAN	SMAD4	Mothers against decapentaplegic homolog 4		24.9672	24.6971	24.7995	24.7796	24.48	24.8093	0.131625	0.428232
O43633	CHM2A_HUMAN	CHMP2A	Charged multivesicular body protein 2a		27.217	27.217	27.1115	26.8504	27.189	27.1115	0.131517	0.535693
Q9NQ34	TMM9B_HUMAN	TMEM9B	Transmembrane protein 9B		22.2214	22.3831	22.3831	22.0821	22.2066	22.3045	0.131466	0.71584
Q9Y3D0	CIA2B_HUMAN	CIAO2B	Cytosolic iron-sulfur assembly component 2B		23.4298	23.6096	23.7182	23.4923	23.2961	23.5754	0.131259	0.483685
Q8IZV5	RDH10_HUMAN	RDH10	Retinol dehydrogenase 10		25.0148	25.3778	25.4425	24.7234	25.3239	25.3943	0.131197	0.201428
Q3L8U1	CHD9_HUMAN	CHD9	Chromodomain-helicase-DNA-binding protein 9		21.3376	21.343	21.0625	21.4526	21.0625	20.8346	0.13111	0.257106
Q96A26	F162A_HUMAN	FAM162A	Protein FAM162A		26.1833	26.3861	26.452	26.0464	26.2891	26.2926	0.131082	0.498559
O75976	CBPD_HUMAN	CPD	Carboxypeptidase D		24.2535	24.4041	24.2891	24.0772	24.275	24.2021	0.130784	0.824953
O60888	CUTA_HUMAN	CUTA	Protein CutA		25.2961	25.4645	25.6348	25.4488	25.217	25.3376	0.130685	0.478929
Q96GY3	LIN37_HUMAN	LIN37	Protein lin-37 homolog		19.5528	19.1916	19.03	19.5426	18.9522	18.8878	0.130601	0.193045
Q53H47	SETMR_HUMAN	SETMAR	Histone-lysine N-methyltransferase SETMAR		23.1946	23.0951	23.3239	23.2051	23.1015	22.9152	0.130578	0.535093
P49281	NRAM2_HUMAN	SLC11A2	Natural resistance-associated macrophage protein 2		21.4874	21.9882	21.68	21.7553	21.7553	21.2535	0.130478	0.230507
Q9UER7	DAXX_HUMAN	DAXX	Death domain-associated protein 6		22.1519	22.2302	22.0886	22.1457	21.9985	21.9352	0.130452	0.808889
Q71RG4	TMUB2_HUMAN	TMUB2	Transmembrane and ubiquitin-like domain-containing protein 2		22.4273	22.002	22.0054	22.4015	21.8113	21.8307	0.130379	0.210958
P62841	RS15_HUMAN	RPS15	Small ribosomal subunit protein uS19		28.0864	28.1015	28.1065	28.0296	27.9316	27.9428	0.130136	1.83649
Q9NRY6	PLS3_HUMAN	PLSCR3	Phospholipid scramblase 3		24.3844	24.4984	24.5225	24.2463	24.3975	24.3712	0.130114	0.964645
Q9HCN3	PGAP6_HUMAN	PGAP6	Post-GPI attachment to proteins factor 6		22.1734	22.0459	22.1642	21.9566	22.2066	21.8307	0.129885	0.478618
Q9Y519	T184B_HUMAN	TMEM184B	Transmembrane protein 184B		21.417	21.1269	21.3752	21.3538	21.1946	20.9812	0.129828	0.38837
Q53EL6	PDCD4_HUMAN	PDCD4	Programmed cell death protein 4		24.4614	24.5463	24.5869	24.1795	24.558	24.4676	0.129821	0.468417
Q9H1X3	DJC25_HUMAN	DNAJC25	DnaJ homolog subfamily C member 25		21.8876	21.8034	21.8651	21.6364	21.8461	21.6843	0.129763	0.885846
Q96J84	KIRR1_HUMAN	KIRREL1	Kin of IRRE-like protein 1		26.1273	26.067	26.1661	26.0296	25.9316	26.0105	0.129597	1.44691
Q8NHP6	MSPD2_HUMAN	MOSPD2	Motile sperm domain-containing protein 2		22.3645	22.019	21.9882	22.2302	21.8839	21.8689	0.129557	0.313812
P08294	SODE_HUMAN	SOD3	Extracellular superoxide dismutase [Cu-Zn]		21.6971	22.0854	22.0156	21.6714	22.1332	21.6051	0.129456	0.250806
P18583	SON_HUMAN	SON	Protein SON		25.141	25.2643	25.1833	25.0935	25.0062	25.1015	0.129131	1.28019
Q99836	MYD88_HUMAN	MYD88	Myeloid differentiation primary response protein MyD88		22.9098	23.0054	22.8987	22.8423	22.7655	22.8191	0.129008	1.46714
Q5T013	HYI_HUMAN	HYI	Putative hydroxypyruvate isomerase		24.5926	24.5285	24.5869	24.4362	24.4488	24.4362	0.128944	2.45377
Q7Z4H8	PLGT3_HUMAN	POGLUT3	Protein O-glucosyltransferase 3		24.7895	24.7286	24.5926	24.4923	24.5463	24.6865	0.128583	0.716143
Q5J8M3	EMC4_HUMAN	EMC4	ER membrane protein complex subunit 4		24.1719	24.4298	24.3578	24.1332	24.1946	24.2463	0.128489	0.701789
O75600	KBL_HUMAN	GCAT	2-amino-3-ketobutyrate coenzyme A ligase, mitochondrial		23.239	23.2492	23.1095	23.1379	23.0658	23.0088	0.128381	1.03141
P54105	ICLN_HUMAN	CLNS1A	Methylosome subunit pICln		25.3844	25.1946	25.217	25.2785	24.976	25.1565	0.128326	0.531542
Q6I9Y2	THOC7_HUMAN	THOC7	THO complex subunit 7 homolog		26.8974	26.8623	26.8142	26.7771	26.673	26.7389	0.128284	1.52707
Q6PI98	IN80C_HUMAN	INO80C	INO80 complex subunit C		19.9601	20.0426	19.7094	19.8485	19.5986	19.8812	0.127914	0.404055
O00562	PITM1_HUMAN	PITPNM1	Membrane-associated phosphatidylinositol transfer protein 1		22.3619	22.5165	22.5638	22.2006	22.4751	22.3831	0.127815	0.560868
P21291	CSRP1_HUMAN	CSRP1	Cysteine and glycine-rich protein 1		27.8264	28.4194	28.1115	27.9259	28.1164	27.9316	0.127779	0.282323
Q9UQ13	SHOC2_HUMAN	SHOC2	Leucine-rich repeat protein SHOC-2		24.1946	24.2961	24.1946	24.0772	24.1642	24.0609	0.127673	1.28385
Q9Y2X9	ZN281_HUMAN	ZNF281	Zinc finger protein 281		27.4234	27.1795	27.2077	27.2979	27.0084	27.1214	0.127647	0.486638
Q16774	KGUA_HUMAN	GUK1	Guanylate kinase		25.0275	25.0772	25.0233	24.8288	24.9495	24.9672	0.127505	1.27769
B3KU38	IQIP1_HUMAN	IQCJ-SCHIP1	IQCJ-SCHIP1 readthrough transcript protein		21.5685	21.5309	21.7715	21.4775	21.3266	21.6843	0.127471	0.425935
P17029	ZKSC1_HUMAN	ZKSCAN1	Zinc finger protein with KRAB and SCAN domains 1		22.8969	22.9795	22.9024	22.7574	22.7915	22.848	0.127277	1.56032
O14672	ADA10_HUMAN	ADAM10	Disintegrin and metalloproteinase domain-containing protein 10		24.5522	24.5754	24.5869	24.4041	24.4488	24.48	0.127197	2.19635
Q2MV58	TECT1_HUMAN	TCTN1	Tectonic-1		20.6453	21.0426	21.0426	20.2989	20.9812	21.0691	0.127085	0.173724
O95391	SLU7_HUMAN	SLU7	Pre-mRNA-splicing factor SLU7		22.1238	22.0088	22.0854	21.9777	21.9316	21.928	0.126904	1.56176
P56277	CMC4_HUMAN	CMC4	Cx9C motif-containing protein 4		20.3752	20.714	20.4775	20.7223	19.7252	20.7389	0.126731	0.133415
Q5EB52	MEST_HUMAN	MEST	Mesoderm-specific transcript homolog protein		26.8264	26.8741	27.0505	26.521	26.6998	27.1507	0.126485	0.251594
Q96QE5	TEFM_HUMAN	TEFM	Transcription elongation factor, mitochondrial		22.2593	22.1238	22.155	22.0393	21.9742	22.1457	0.126282	0.912312
Q9Y6M7	S4A7_HUMAN	SLC4A7	Sodium bicarbonate cotransporter 3		24.6757	24.5045	24.4362	24.5696	24.3376	24.3307	0.126144	0.522956
Q9BT40	INP5K_HUMAN	INPP5K	Inositol polyphosphate 5-phosphatase K		23.4551	23.5285	23.5638	23.4041	23.4551	23.3101	0.126068	1.11455
Q86SX6	GLRX5_HUMAN	GLRX5	Glutaredoxin-related protein 5, mitochondrial		24.0359	24.019	24.0526	23.9406	23.867	23.9225	0.125804	2.18863
Q9Y314	NOSIP_HUMAN	NOSIP	Nitric oxide synthase-interacting protein		23.7995	23.5869	23.5522	23.6649	23.4923	23.4041	0.125759	0.505591
Q8TDV2	GP148_HUMAN	GPR148	Probable G-protein coupled receptor 148		19.6853	19.5015	19.4549	19.5158	19.6368	19.1118	0.125746	0.293324
O43493	TGON2_HUMAN	TGOLN2	Trans-Golgi network integral membrane protein 2		25.9606	26.0505	25.9933	25.8599	25.9361	25.8312	0.125732	1.43163
Q9UGU5	HMGX4_HUMAN	HMGXB4	HMG domain-containing protein 4		22.1673	22.2477	22.1174	22.2006	21.9566	21.9985	0.125576	0.676193
P43897	EFTS_HUMAN	TSFM	Elongation factor Ts, mitochondrial		24.9271	24.8288	24.7492	24.7846	24.7286	24.6153	0.125547	0.811438
O14786	NRP1_HUMAN	NRP1	Neuropilin-1		25.9562	25.8741	25.8312	25.797	25.7645	25.7234	0.125544	1.38212
Q9UH92	MLX_HUMAN	MLX	Max-like protein X		20.5638	20.3211	20.68	20.5356	20.3211	20.3321	0.125373	0.422181
Q9UJA5	TRM6_HUMAN	TRMT6	tRNA (adenine(58)-N(1))-methyltransferase non-catalytic subunit TRM6		25.4953	25.3975	25.3135	25.4266	25.1795	25.2243	0.125317	0.608168
Q13547	HDAC1_HUMAN	HDAC1	Histone deacetylase 1		26.5653	26.4969	26.4551	26.4346	26.3359	26.3712	0.12521	1.35495
Q96EC8	YIPF6_HUMAN	YIPF6	Protein YIPF6		23.7895	23.867	23.9584	23.632	23.848	23.7594	0.125168	0.720672
Q9BQ75	CMS1_HUMAN	CMSS1	Protein CMSS1		23.4298	23.1379	23.0088	23.5638	22.6843	22.953	0.125109	0.163118
P30040	ERP29_HUMAN	ERP29	Endoplasmic reticulum resident protein 29		27.9088	27.9484	28.003	27.726	27.8445	27.9146	0.125084	0.952975
Q9UJF2	NGAP_HUMAN	RASAL2	Ras GTPase-activating protein nGAP		23.9672	23.7389	23.867	23.848	23.632	23.7182	0.124976	0.615846
Q8WUD1	RAB2B_HUMAN	RAB2B	Ras-related protein Rab-2B		23.2679	23.2679	23.3376	22.9548	23.2961	23.2477	0.124862	0.499831
Q9BZ76	CNTP3_HUMAN	CNTNAP3	Contactin-associated protein-like 3		24.4551	24.848	24.654	24.317	24.7492	24.5165	0.124829	0.30066
P62487	RPB7_HUMAN	POLR2G	DNA-directed RNA polymerase II subunit RPB7		23.9672	23.9134	23.9225	23.9406	23.7389	23.7492	0.124821	0.857834
Q14697	GANAB_HUMAN	GANAB	Neutral alpha-glucosidase AB		28.7096	28.7833	28.8203	28.5463	28.6764	28.7162	0.124797	0.961906
Q5TID7	CC181_HUMAN	CCDC181	Coiled-coil domain-containing protein 181		20.4676	20.7389	20.6886	18.5256	21.3857	21.6096	0.124723	0.0426728
Q8N6L1	KTAP2_HUMAN	KRTCAP2	Keratinocyte-associated protein 2		26.0169	26.4008	26.239	25.9584	26.1546	26.17	0.124587	0.40484
Q9BWD1	THIC_HUMAN	ACAT2	Acetyl-CoA acetyltransferase, cytosolic		26.7129	26.3342	26.4378	26.9088	26.0874	26.1155	0.124387	0.159855
Q8TEA8	DTD1_HUMAN	DTD1	D-aminoacyl-tRNA deacylase 1		25.1015	25.1449	25.1642	25.0772	24.9933	24.9672	0.124285	1.51092
Q96MX6	DAA10_HUMAN	DNAAF10	Dynein axonemal assembly factor 10		23.895	23.976	23.9316	23.6865	23.867	23.8764	0.124221	0.874925
P49419	AL7A1_HUMAN	ALDH7A1	Alpha-aminoadipic semialdehyde dehydrogenase		27.1984	27.3239	27.1312	27.1015	27.1604	27.019	0.12419	0.824801
Q13950	RUNX2_HUMAN	RUNX2	Runt-related transcription factor 2		23.0275	23.1079	22.9601	22.895	22.8895	22.9388	0.124077	1.27997
Q96QB1	RHG07_HUMAN	DLC1	Rho GTPase-activating protein 7		23.9225	23.5754	23.7077	23.7895	23.48	23.5638	0.124076	0.380508
P05556	ITB1_HUMAN	ITGB1	Integrin beta-1		29.2077	29.2285	29.217	28.9869	29.1459	29.1483	0.124032	1.08468
Q9Y2A4	ZN443_HUMAN	ZNF443	Zinc finger protein 443		20.85	20.714	18.8157	19.2807	18.7044	22.0224	0.124026	0.0344819
O95822	DCMC_HUMAN	MLYCD	Malonyl-CoA decarboxylase, mitochondrial		21.7307	21.8423	21.9777	21.7594	21.7098	21.7098	0.123908	0.779131
Q9UNK0	STX8_HUMAN	STX8	Syntaxin-8		23.3511	23.5285	23.5285	23.2679	23.391	23.3778	0.123812	0.80828
Q99571	P2RX4_HUMAN	P2RX4	P2X purinoceptor 4		20.3101	20.654	20.6971	19.9316	20.6276	20.7307	0.12381	0.167229
Q8NDW8	TT21A_HUMAN	TTC21A	Tetratricopeptide repeat protein 21A		21.0224	20.7307	20.8802	21.0088	20.68	20.5731	0.123764	0.326503
Q8N4V1	EMC5_HUMAN	MMGT1	ER membrane protein complex subunit 5		24.4041	24.5285	24.275	24.2463	24.1795	24.4105	0.123745	0.545118
P62310	LSM3_HUMAN	LSM3	U6 snRNA-associated Sm-like protein LSm3		24.5983	24.5696	24.8385	24.7129	24.4551	24.4676	0.123583	0.443823
P09429	HMGB1_HUMAN	HMGB1	High mobility group protein B1		29.9814	30.1239	30.1115	29.9117	30.0084	29.9259	0.12358	1.06322
A8MWK0	FS2P1_HUMAN	FADS2B	Putative fatty acid desaturase 2-like protein FADS2B		17.6509	17.5763	17.7173	17.6002	17.6701	17.3046	0.12317	0.444003
Q9BZR9	TRIM8_HUMAN	TRIM8	E3 ubiquitin-protein ligase TRIM8		19.9742	20.7307	20.2302	19.1296	20.6971	20.7389	0.123147	0.0753593
O15321	TM9S1_HUMAN	TM9SF1	Transmembrane 9 superfamily member 1		24.4425	24.5404	24.6153	24.3376	24.4614	24.4298	0.123135	0.923438
Q9UIS9	MBD1_HUMAN	MBD1	Methyl-CpG-binding domain protein 1		22.7348	22.6907	22.6276	22.6186	22.4972	22.5685	0.122935	1.22829
Q9H668	STN1_HUMAN	STN1	CST complex subunit STN1		20.1946	20.1206	20.1581	19.7413	20.1332	20.2302	0.122835	0.335855
Q9ULT0	TTC7A_HUMAN	TTC7A	Tetratricopeptide repeat protein 7A		23.2961	23.0576	23.178	23.0756	23.1206	22.9672	0.122753	0.675138
Q8WUI4	HDAC7_HUMAN	HDAC7	Histone deacetylase 7		23.4676	23.417	23.4551	23.3239	23.3239	23.3239	0.122695	2.89012
Q9H4I9	EMRE_HUMAN	SMDT1	Essential MCU regulator, mitochondrial		23.6209	23.4425	23.5754	23.2419	23.4425	23.5869	0.122488	0.467206
Q8IYT2	CMTR2_HUMAN	CMTR2	Cap-specific mRNA (nucleoside-2'-O-)-methyltransferase 2		21.7013	21.5404	21.4476	21.6453	21.5498	21.1269	0.122438	0.280485
O43505	B4GA1_HUMAN	B4GAT1	Beta-1,4-glucuronyltransferase 1		23.9584	24.1642	24.0526	23.7796	24.0526	23.976	0.122356	0.535575
Q9Y2Q9	RT28_HUMAN	MRPS28	Small ribosomal subunit protein bS1m		25.6375	25.5812	25.4892	25.5135	25.4073	25.4202	0.122306	1.05118
Q9BWS9	CHID1_HUMAN	CHID1	Chitinase domain-containing protein 1		24.1253	24.4105	24.2961	23.9225	24.2891	24.2535	0.122293	0.355508
Q9BTY2	FUCO2_HUMAN	FUCA2	Plasma alpha-L-fucosidase		24.4676	24.7077	24.5754	24.1642	24.6918	24.5285	0.122065	0.288999
P08697	A2AP_HUMAN	SERPINF2	Alpha-2-antiplasmin		22.4947	22.1856	22.6971	22.3962	22.2066	22.4092	0.121777	0.305098
P62079	TSN5_HUMAN	TSPAN5	Tetraspanin-5		19.27	19.0874	19.1613	19.043	19.0289	19.0829	0.121298	1.02744
Q9BV36	MELPH_HUMAN	MLPH	Melanophilin		23.848	23.8093	23.8385	23.7594	23.6971	23.6757	0.121199	1.92568
P78381	S35A2_HUMAN	SLC35A2	UDP-galactose translocator		22.8171	22.6253	22.9225	22.4972	22.8307	22.6736	0.121172	0.394232
Q9NQG1	MANBL_HUMAN	MANBAL	Protein MANBAL		23.5983	23.8191	23.8858	23.632	23.6649	23.6431	0.121064	0.623008
Q8NFJ5	RAI3_HUMAN	GPRC5A	Retinoic acid-induced protein 3		25.9562	25.8167	25.9825	25.8069	25.7543	25.8312	0.120976	1.00935
P78560	CRADD_HUMAN	CRADD	Death domain-containing protein CRADD		19.8712	20.1825	19.9601	19.8745	19.7749	20.002	0.120847	0.459473
Q9HAS0	NJMU_HUMAN	C17orf75	Protein Njmu-R1		23.5754	23.5754	23.5638	23.4676	23.417	23.4676	0.120816	2.65425
Q9BST9	RTKN_HUMAN	RTKN	Rhotekin		20.265	20.2419	20.2185	20.2185	19.9742	20.1704	0.120778	0.728751
Q9UJM3	ERRFI_HUMAN	ERRFI1	ERBB receptor feedback inhibitor 1		23.417	23.5404	23.6649	23.3645	23.391	23.5045	0.12077	0.654826
Q9UNS2	CSN3_HUMAN	COPS3	COP9 signalosome complex subunit 3		25.7619	26.1449	25.9157	25.6865	25.9847	25.7895	0.120619	0.354509
Q9Y5Q9	TF3C3_HUMAN	GTF3C3	General transcription factor 3C polypeptide 3		23.1316	23.0983	23.1519	23.0241	23.0609	22.9352	0.12056	1.39014
Q96B54	ZN428_HUMAN	ZNF428	Zinc finger protein 428		23.6209	23.6209	23.6209	23.3511	23.5404	23.6096	0.120494	0.712429
Q5TC12	ATPF1_HUMAN	ATPAF1	ATP synthase mitochondrial F1 complex assembly factor 1		23.5404	23.3101	23.1519	23.5045	23.0691	23.0674	0.120465	0.260875
O75909	CCNK_HUMAN	CCNK	Cyclin-K		23.632	23.5165	23.5754	23.5165	23.4551	23.391	0.120434	1.15017
Q7Z7N9	T179B_HUMAN	TMEM179B	Transmembrane protein 179B		24.4923	24.604	24.5869	24.3031	24.5638	24.4551	0.120368	0.654535
P82933	RT09_HUMAN	MRPS9	Small ribosomal subunit protein uS9m		24.2317	24.1642	24.019	24.0772	23.9495	24.0275	0.120241	0.758076
Q9HAN9	NMNA1_HUMAN	NMNAT1	Nicotinamide/nicotinic acid mononucleotide adenylyltransferase 1		23.7995	23.9406	23.9316	23.6649	23.7796	23.867	0.120024	0.742267
Q9UMY1	UTP16_HUMAN	NOL7	U3 small nucleolar RNA-associated protein NOL7		24.0443	23.7286	23.867	23.8858	23.6971	23.6971	0.11997	0.468196
Q5W0Z9	ZDH20_HUMAN	ZDHHC20	Palmitoyltransferase ZDHHC20		22.7369	22.7327	22.695	22.4849	22.7035	22.6164	0.119933	0.859155
Q92993	KAT5_HUMAN	KAT5	Histone acetyltransferase KAT5		20.1704	19.9459	20.1581	20.1206	19.9742	19.8203	0.11975	0.456009
P26006	ITA3_HUMAN	ITGA3	Integrin alpha-3		28.8504	28.8711	28.8829	28.7195	28.7581	28.7676	0.119741	2.62112
P27105	STOM_HUMAN	STOM	Stomatin		23.0967	22.9637	22.8969	23.0592	22.7856	22.7533	0.11973	0.455072
Q14703	MBTP1_HUMAN	MBTPS1	Membrane-bound transcription factor site-1 protease		20.0951	19.9311	19.5405	19.7689	19.7905	19.649	0.119423	0.282556
Q5TGS1	HES3_HUMAN	HES3	Transcription factor HES-3		19.8917	19.8503	19.6957	19.7583	19.652	19.6693	0.119384	0.810771
Q13670	PM2PB_HUMAN	PMS2P11	Putative postmeiotic segregation increased 2-like protein 11		20.3962	20.4676	20.1825	20.1079	20.3857	20.1946	0.119383	0.430425
O14618	CCS_HUMAN	CCS	Copper chaperone for superoxide dismutase		23.867	24.1095	24.0359	23.6649	24.0854	23.9043	0.119287	0.350471
Q96AB3	ISOC2_HUMAN	ISOC2	Isochorismatase domain-containing protein 2		23.9672	24.141	24.2243	23.8385	24.0275	24.1095	0.119042	0.466718
Q6IPR3	TYW3_HUMAN	TYW3	tRNA wybutosine-synthesizing protein 3 homolog		21.343	21.5404	21.4825	21.2535	21.3645	21.391	0.118939	0.757955
O94766	B3GA3_HUMAN	B3GAT3	Galactosylgalactosylxylosylprotein 3-beta-glucuronosyltransferase 3		24.0105	24.2096	24.1795	23.9134	24.0609	24.0691	0.118741	0.674183
Q9HA72	CAHM2_HUMAN	CALHM2	Calcium homeostasis modulator protein 2		19.7559	19.8851	20.1457	19.5547	19.9157	19.9601	0.118722	0.277139
Q569H4	LARGN_HUMAN	PRR16	Protein Largen		19.6426	19.7596	19.6597	19.5904	19.5031	19.6123	0.118694	1.12961
Q86VV8	RTTN_HUMAN	RTTN	Rotatin		20.5823	20.4067	20.3321	20.654	20.0691	20.2419	0.118692	0.249121
Q68DH5	LMBD2_HUMAN	LMBRD2	G-protein coupled receptor-associated protein LMBRD2		22.6298	22.8423	22.7307	22.6231	22.5117	22.7119	0.118683	0.633965
Q6ZRF7	ZN818_HUMAN	ZNF818P	Putative zinc finger protein 818		22.8876	23.0707	22.8969	22.8423	23.0723	22.5846	0.11865	0.317699
Q9ULI3	HEG1_HUMAN	HEG1	Protein HEG homolog 1		23.6757	23.848	23.895	23.5045	23.8093	23.7492	0.118619	0.444721
Q9H0W9	CK054_HUMAN	C11orf54	Ester hydrolase C11orf54		25.2926	25.3811	25.452	25.1642	25.2856	25.3204	0.118495	0.831518
P49336	CDK8_HUMAN	CDK8	Cyclin-dependent kinase 8		23.391	23.3511	23.2679	23.2021	23.2346	23.2185	0.118265	1.46454
P60602	ROMO1_HUMAN	ROMO1	Reactive oxygen species modulator 1		24.7286	24.7389	24.5754	24.604	24.4862	24.5983	0.118151	0.839414
Q01814	AT2B2_HUMAN	ATP2B2	Plasma membrane calcium-transporting ATPase 2		24.5869	24.6264	24.5638	24.4298	24.4234	24.5696	0.118107	1.0868
Q6GQQ9	OTU7B_HUMAN	OTUD7B	OTU domain-containing protein 7B		22.882	22.8288	22.7915	22.6865	22.6628	22.7995	0.117903	1.11594
Q32P51	RA1L2_HUMAN	HNRNPA1L2	Heterogeneous nuclear ribonucleoprotein A1-like 2		30.8081	30.8081	30.6285	30.6713	30.5664	30.6544	0.117535	0.797134
P04216	THY1_HUMAN	THY1	Thy-1 membrane glycoprotein		28.3023	28.4113	28.3951	27.9923	28.3324	28.4314	0.117524	0.356389
Q12846	STX4_HUMAN	STX4	Syntaxin-4		24.5285	24.5983	24.6649	24.4425	24.4923	24.5045	0.117494	1.26165
Q2TAK8	PWP3A_HUMAN	PWWP3A	PWWP domain-containing DNA repair factor 3A		20.6006	20.4775	20.6453	20.3101	20.4972	20.5638	0.117438	0.574332
P35580	MYH10_HUMAN	MYH10	Myosin-10		26.3528	26.2696	26.433	26.1604	26.2803	26.2625	0.117423	0.911063
Q9UPY5	XCT_HUMAN	SLC7A11	Cystine/glutamate transporter		22.3101	21.4923	21.4626	22.2214	21.3538	21.3376	0.117412	0.105007
P06753	TPM3_HUMAN	TPM3	Tropomyosin alpha-3 chain		28.9088	28.8829	28.8916	28.7676	28.7927	28.7708	0.117408	3.36475
Q96EL3	RM53_HUMAN	MRPL53	Large ribosomal subunit protein mL53		24.2961	24.0526	24.2463	24.1488	24.1095	23.9847	0.117341	0.586863
Q01167	FOXK2_HUMAN	FOXK2	Forkhead box protein K2		22.5141	22.44	22.3129	22.4947	22.1047	22.3156	0.117311	0.389007
Q7L523	RRAGA_HUMAN	RRAGA	Ras-related GTP-binding protein A		24.7695	24.7695	24.7995	24.5463	24.6971	24.7441	0.117014	0.902439
Q12955	ANK3_HUMAN	ANK3	Ankyrin-3		22.0493	22.1734	22.1426	21.953	22.002	22.0592	0.117014	1.13911
Q9H7Z7	PGES2_HUMAN	PTGES2	Prostaglandin E synthase 2		24.5105	24.9803	24.6595	24.7645	24.6703	24.3645	0.117001	0.252554
P56937	DHB7_HUMAN	HSD17B7	3-keto-steroid reductase/17-beta-hydroxysteroid dehydrogenase 7		23.4551	23.0821	23.4425	23.3645	22.9406	23.3239	0.116938	0.254988
Q9BRK3	MXRA8_HUMAN	MXRA8	Matrix remodeling-associated protein 8		24.6595	24.5165	24.5754	24.4234	24.4488	24.5285	0.116891	1.05257
Q96LA8	ANM6_HUMAN	PRMT6	Protein arginine N-methyltransferase 6		22.0658	22.0526	22.1143	21.8385	22.0592	21.9847	0.116765	0.799515
Q5T160	SYRM_HUMAN	RARS2	Probable arginine--tRNA ligase, mitochondrial		23.2096	23.2125	23.1991	23.0509	23.1316	23.0886	0.116671	2.10369
Q5TAX3	TUT4_HUMAN	TUT4	Terminal uridylyltransferase 4		24.0691	24.019	24.0105	23.7995	23.9134	24.0359	0.11661	0.758761
O60583	CCNT2_HUMAN	CCNT2	Cyclin-T2		21.9882	22.1519	22.1301	21.9171	22.0325	21.9707	0.116597	0.887517
Q6PI26	SHQ1_HUMAN	SHQ1	Protein SHQ1 homolog		19.9163	19.6875	19.8571	19.9281	19.4837	19.6997	0.116474	0.329518
Q8N3R9	PALS1_HUMAN	PALS1	Protein PALS1		23.4041	23.3239	23.4425	23.3376	23.3239	23.1596	0.116469	0.803621
Q14141	SEPT6_HUMAN	SEPTIN6	Septin-6		23.6209	23.9495	24.019	23.5638	23.8093	23.867	0.116404	0.308216
Q9P003	CNIH4_HUMAN	CNIH4	Protein cornichon homolog 4		25.7129	25.7286	25.7389	25.5045	25.5725	25.7543	0.116381	0.708979
Q8NHY2	COP1_HUMAN	COP1	E3 ubiquitin-protein ligase COP1		19.413	18.7475	18.7118	18.8167	18.7187	18.9877	0.116377	0.183982
P09486	SPRC_HUMAN	SPARC	SPARC		26.9203	27.4473	27.4314	26.7771	27.3662	27.3066	0.116357	0.172736
Q8IUE6	H2A2B_HUMAN	H2AC21	Histone H2A type 2-B		28.2979	28.4274	28.3367	28.1604	28.4314	28.1214	0.116277	0.482385
P50613	CDK7_HUMAN	CDK7	Cyclin-dependent kinase 7		23.4551	23.2679	23.2521	23.3645	23.1285	23.1332	0.116271	0.499916
Q8IWY9	CDAN1_HUMAN	CDAN1	Codanin-1		21.2877	21.1079	21.1457	21.0691	21.0156	21.1079	0.116233	0.889205
Q8NFZ8	CADM4_HUMAN	CADM4	Cell adhesion molecule 4		22.4451	22.5237	22.6562	21.9916	22.4273	22.8576	0.116186	0.170583
Q8N441	FGRL1_HUMAN	FGFRL1	Fibroblast growth factor receptor-like 1		19.2937	18.8663	18.9089	19.0887	18.7582	18.8736	0.116119	0.279951
Q7Z7G8	VP13B_HUMAN	VPS13B	Intermembrane lipid transfer protein VPS13B		23.5638	23.5285	23.5285	23.4041	23.3645	23.5045	0.115934	1.25719
Q96HA1	P121A_HUMAN	POM121	Nuclear envelope pore membrane protein POM 121		23.5045	23.4425	23.48	23.3511	23.391	23.3376	0.115775	2.06333
Q92600	CNOT9_HUMAN	CNOT9	CCR4-NOT transcription complex subunit 9		23.6971	23.6209	23.654	23.654	23.5285	23.4425	0.115646	0.820874
Q5HYA8	MKS3_HUMAN	TMEM67	Meckelin		20.9882	21.1269	21.3321	20.9672	21.1519	20.9812	0.115628	0.424717
P08397	HEM3_HUMAN	HMBS	Porphobilinogen deaminase		24.2463	24.275	24.019	24.217	24.0359	23.9406	0.115613	0.431815
Q8NBM8	PCYXL_HUMAN	PCYOX1L	Prenylcysteine oxidase-like		23.7995	23.8858	23.7077	23.654	23.7492	23.6431	0.115538	0.874918
Q9ULE6	PALD_HUMAN	PALD1	Paladin		20.9388	21.1519	21.1581	21.0426	20.8576	21.002	0.115538	0.561069
O00767	SCD_HUMAN	SCD	Stearoyl-CoA desaturase		25.772	25.4488	25.4614	25.4645	25.4645	25.4073	0.115316	0.464152
Q9UPW0	FOXJ3_HUMAN	FOXJ3	Forkhead box protein J3		22.5189	22.4898	22.6276	22.5045	22.3511	22.4349	0.115283	0.880097
Q969Z3	MARC2_HUMAN	MTARC2	Mitochondrial amidoxime reducing component 2		21.0886	21.0886	21.0625	20.9882	20.9316	20.9742	0.115264	2.41868
Q5VZF2	MBNL2_HUMAN	MBNL2	Muscleblind-like protein 2		22.0156	22.3045	22.0918	21.9916	21.9423	22.1332	0.114944	0.481951
O15145	ARPC3_HUMAN	ARPC3	Actin-related protein 2/3 complex subunit 3		28.217	28.2308	28.2216	28.0609	28.066	28.1984	0.114711	1.19337
P19634	SL9A1_HUMAN	SLC9A1	Sodium/hydrogen exchanger 1		22.695	22.7634	22.8269	22.5592	22.6209	22.7614	0.114612	0.741249
Q9NVI7	ATD3A_HUMAN	ATAD3A	ATPase family AAA domain-containing protein 3A		25.5841	25.5075	25.5315	25.4984	25.3745	25.4073	0.114274	1.23632
Q13907	IDI1_HUMAN	IDI1	Isopentenyl-diphosphate Delta-isomerase 1		25.2463	24.9716	24.989	25.3612	24.7695	24.7338	0.114137	0.197754
O94887	FARP2_HUMAN	FARP2	FERM, ARHGEF and pleckstrin domain-containing protein 2		22.6164	22.3988	22.654	22.6141	22.2933	22.4196	0.114073	0.392739
Q96EF6	FBX17_HUMAN	FBXO17	F-box only protein 17		21.8764	21.7098	21.5451	21.6628	21.5213	21.6051	0.114032	0.475205
P16402	H13_HUMAN	H1-3	Histone H1.3		24.2607	24.2891	24.1795	24.2021	24.141	24.0443	0.113974	0.944006
P34810	CD68_HUMAN	CD68	Macrosialin		24.002	24.2607	24.1015	23.8858	24.019	24.1174	0.113971	0.492307
Q96DM3	RMC1_HUMAN	RMC1	Regulator of MON1-CCZ1 complex		21.7013	21.7553	21.7348	21.6757	21.5869	21.5869	0.113962	1.56399
Q9UBH6	S53A1_HUMAN	XPR1	Solute carrier family 53 member 1		22.6074	22.6141	22.5938	22.4551	22.5708	22.4476	0.113928	1.32274
O14730	RIOK3_HUMAN	RIOK3	Serine/threonine-protein kinase RIO3		22.969	22.9441	23.184	22.6475	22.9654	23.1426	0.113886	0.280006
Q7Z6I8	CE024_HUMAN	C5orf24	UPF0461 protein C5orf24		22.1825	22.2273	22.2036	22.0854	21.9951	22.1916	0.113791	0.912041
Q07954	LRP1_HUMAN	LRP1	Prolow-density lipoprotein receptor-related protein 1		26.5478	26.8504	26.8264	26.4314	26.726	26.726	0.113728	0.34053
Q6UXN8	CLC9A_HUMAN	CLEC9A	C-type lectin domain family 9 member A		19.5085	20.002	19.4914	19.5697	19.6701	19.4211	0.113661	0.246521
P62136	PP1A_HUMAN	PPP1CA	Serine/threonine-protein phosphatase PP1-alpha catalytic subunit		27.5463	27.5463	27.5315	27.391	27.391	27.5014	0.113537	1.42297
Q6PD74	AAGAB_HUMAN	AAGAB	Alpha- and gamma-adaptin-binding protein p34		24.2021	24.2317	24.2463	24.2607	24.0772	24.002	0.113386	0.658863
P27797	CALR_HUMAN	CALR	Calreticulin		30.5296	30.7927	30.6964	30.2869	30.6629	30.7292	0.113226	0.290327
Q8WTV0	SCRB1_HUMAN	SCARB1	Scavenger receptor class B member 1		22.8171	22.7756	22.5451	22.7451	22.4825	22.5708	0.113145	0.421335
Q9Y6D5	BIG2_HUMAN	ARFGEF2	Brefeldin A-inhibited guanine nucleotide-exchange protein 2		24.6375	24.6209	24.5754	24.4614	24.5225	24.5105	0.113138	1.89588
Q9NNW5	WDR6_HUMAN	WDR6	tRNA (34-2'-O)-methyltransferase regulator WDR6		23.7077	23.6431	23.632	23.5983	23.5285	23.5165	0.113127	1.50582
Q6Y2X3	DJC14_HUMAN	DNAJC14	DnaJ homolog subfamily C member 14		20.5915	20.68	20.8191	21.3538	19.5786	20.8191	0.113038	0.0749356
Q9Y3E5	PTH2_HUMAN	PTRH2	Peptidyl-tRNA hydrolase 2, mitochondrial		25.6375	25.6264	25.6811	25.5463	25.5955	25.4645	0.112944	1.27127
Q6YN16	HSDL2_HUMAN	HSDL2	Hydroxysteroid dehydrogenase-like protein 2		25.7771	25.7415	25.6237	25.7077	25.5983	25.4984	0.112612	0.670888
Q96AJ9	VTI1A_HUMAN	VTI1A	Vesicle transport through interaction with t-SNAREs homolog 1A		24.019	24.1565	24.217	24.1946	23.867	23.9933	0.11252	0.429877
Q9NQZ5	STAR7_HUMAN	STARD7	StAR-related lipid transfer protein 7, mitochondrial		22.7077	22.5475	22.6119	22.632	22.4601	22.4375	0.112471	0.661128
Q9UPM9	B9D1_HUMAN	B9D1	B9 domain-containing protein 1		22.6342	22.7307	22.6475	22.4849	22.6736	22.5165	0.112437	0.790298
O95273	CCDB1_HUMAN	CCNDBP1	Cyclin-D1-binding protein 1		23.8093	23.1047	23.2521	23.2229	23.2961	23.3101	0.112321	0.200022
Q96E39	RMXL1_HUMAN	RBMXL1	RNA binding motif protein, X-linked-like-1		28.2935	28.3578	28.2979	28.2262	28.2262	28.1604	0.112158	1.68677
O14893	GEMI2_HUMAN	GEMIN2	Gem-associated protein 2		23.0409	22.7098	22.7265	22.7715	22.6119	22.7574	0.112145	0.397963
Q7KYR7	BT2A1_HUMAN	BTN2A1	Butyrophilin subfamily 2 member A1		21.9777	22.0658	22.0821	21.8034	21.9601	22.0258	0.112092	0.694705
Q9H2H9	S38A1_HUMAN	SLC38A1	Sodium-coupled neutral amino acid symporter 1		22.714	21.7756	22.0122	22.5568	21.9243	21.6843	0.112088	0.10533
Q9BX46	RBM24_HUMAN	RBM24	RNA-binding protein 24		20.6453	20.2066	20.6186	20.2419	20.5823	20.3101	0.112049	0.252605
Q9Y291	RT33_HUMAN	MRPS33	Small ribosomal subunit protein mS33		24.141	24.0691	24.0609	23.9584	24.0359	23.9406	0.112038	1.35011
O94819	KBTBB_HUMAN	KBTBD11	Kelch repeat and BTB domain-containing protein 11		20.9672	21.1519	21.2477	20.9024	21.1332	20.9951	0.112037	0.454886
Q9NXJ5	PGPI_HUMAN	PGPEP1	Pyroglutamyl-peptidase 1		22.3565	22.68	22.6886	22.1581	22.5708	22.6606	0.111885	0.23171
Q8TEX9	IPO4_HUMAN	IPO4	Importin-4		25.9066	25.824	25.8336	25.7871	25.7182	25.7234	0.111851	1.51156
Q9HCG7	GBA2_HUMAN	GBA2	Non-lysosomal glucosylceramidase		22.2506	22.6886	22.5685	22.1047	22.5731	22.4947	0.111715	0.22365
P10588	NR2F6_HUMAN	NR2F6	Nuclear receptor subfamily 2 group F member 6		24.3239	24.2463	24.3031	24.1719	24.1719	24.1946	0.111637	1.99019
Q9BRR8	GPTC1_HUMAN	GPATCH1	G patch domain-containing protein 1		20.3321	20.1946	20.1704	20.7715	19.3373	20.2535	0.111576	0.0943759
Q9BWE0	REPI1_HUMAN	REPIN1	Replication initiator 1		21.5356	21.6453	21.3376	21.6096	21.5117	21.0625	0.111537	0.228708
Q7RTP0	NIPA1_HUMAN	NIPA1	Magnesium transporter NIPA1		21.8191	21.743	21.4375	21.5498	21.6231	21.4923	0.111467	0.382252
O15213	WDR46_HUMAN	WDR46	WD repeat-containing protein 46		23.7492	23.5869	23.5754	23.6431	23.4676	23.4676	0.111077	0.615515
Q00534	CDK6_HUMAN	CDK6	Cyclin-dependent kinase 6		25.1253	25.1871	25.2643	25.019	25.0526	25.1719	0.111062	0.839824
Q9H479	FN3K_HUMAN	FN3K	Fructosamine-3-kinase		20.2185	20.3752	20.2066	19.9145	20.2877	20.265	0.111005	0.347601
Q8WYQ5	DGCR8_HUMAN	DGCR8	Microprocessor complex subunit DGCR8		22.6453	22.5662	22.5404	22.5568	22.44	22.4221	0.110943	0.986477
P22670	RFX1_HUMAN	RFX1	MHC class II regulatory factor RFX1		22.6387	22.7348	22.7856	22.5404	22.5846	22.7013	0.110888	0.793932
P42677	RS27_HUMAN	RPS27	Small ribosomal subunit protein eS27		28.9287	28.8593	28.8355	28.8916	28.6898	28.7096	0.110845	0.724293
Q9NUW8	TYDP1_HUMAN	TDP1	Tyrosyl-DNA phosphodiesterase 1		22.6051	22.391	22.3884	22.4576	22.3211	22.2736	0.110725	0.53975
P62877	RBX1_HUMAN	RBX1	E3 ubiquitin-protein ligase RBX1		26.7389	26.8623	26.8264	26.7129	26.7645	26.6181	0.11072	0.916877
O15120	PLCB_HUMAN	AGPAT2	1-acyl-sn-glycerol-3-phosphate acyltransferase beta		22.2506	22.2273	22.2679	22.2006	22.1976	22.0156	0.110638	0.823001
P09972	ALDOC_HUMAN	ALDOC	Fructose-bisphosphate aldolase C		26.509	26.632	26.8858	26.4186	26.673	26.604	0.110379	0.339368
Q9BRP8	PYM1_HUMAN	PYM1	Partner of Y14 and mago		24.632	24.7796	24.7286	24.5285	24.6486	24.632	0.110362	0.898278
Q15370	ELOB_HUMAN	ELOB	Elongin-B		27.019	26.9869	27.0609	26.8974	26.8741	26.965	0.110102	1.47254
P26583	HMGB2_HUMAN	HMGB2	High mobility group protein B2		28.391	28.3367	28.2979	28.2847	28.217	28.1937	0.110085	1.34076
Q8WVK2	SNR27_HUMAN	SNRNP27	U4/U6.U5 small nuclear ribonucleoprotein 27 kDa protein		23.0054	22.7816	22.7614	22.743	22.6606	22.8152	0.109856	0.538422
Q9NRA1	PDGFC_HUMAN	PDGFC	Platelet-derived growth factor C		23.3645	23.0609	23.1991	23.2081	23.002	23.0854	0.109695	0.443469
P13612	ITA4_HUMAN	ITGA4	Integrin alpha-4		22.7975	22.4775	22.3988	22.6298	22.265	22.4501	0.109663	0.272952
Q969N2	PIGT_HUMAN	PIGT	GPI transamidase component PIG-T		25.239	25.0233	24.1642	24.9584	25.0062	24.1332	0.109559	0.0899113
Q9H173	SIL1_HUMAN	SIL1	Nucleotide exchange factor SIL1		24.002	24.2891	24.239	23.9043	24.1719	24.1253	0.109531	0.380096
P27701	CD82_HUMAN	CD82	CD82 antigen		24.6865	24.8858	24.8528	24.5638	24.8623	24.6703	0.109519	0.439398
Q16630	CPSF6_HUMAN	CPSF6	Cleavage and polyadenylation specificity factor subunit 6		26.1814	26.17	26.143	26.0233	26.0975	26.0464	0.109079	1.937
P35998	PRS7_HUMAN	PSMC2	26S proteasome regulatory subunit 7		27.1214	27.0505	27.0609	26.9869	26.9428	26.976	0.109048	1.87429
Q9H6L2	TM231_HUMAN	TMEM231	Transmembrane protein 231		21.8802	22.1363	22.1395	21.7876	22.0122	22.0292	0.109001	0.39749
P51858	HDGF_HUMAN	HDGF	Hepatoma-derived growth factor		27.9977	28.1747	28.1015	27.9088	28.019	28.019	0.108994	0.797391
O75787	RENR_HUMAN	ATP6AP2	Renin receptor		23.5638	23.6096	23.5754	23.5638	23.391	23.4676	0.108814	0.983621
Q01196	RUNX1_HUMAN	RUNX1	Runt-related transcription factor 1		22.2185	21.9601	22.0789	22.0756	21.9207	21.9352	0.108657	0.535242
Q9P2K3	RCOR3_HUMAN	RCOR3	REST corepressor 3		23.9495	23.9406	23.7594	23.7594	23.867	23.6971	0.108638	0.614593
Q15052	ARHG6_HUMAN	ARHGEF6	Rho guanine nucleotide exchange factor 6		28.2077	28.1984	28.3196	28.1652	28.0505	28.1842	0.108567	0.885832
Q9NX24	NHP2_HUMAN	NHP2	H/ACA ribonucleoprotein complex subunit 2		25.5609	25.48	25.7517	25.5638	25.4862	25.417	0.108562	0.524363
Q9H330	TM245_HUMAN	TMEM245	Transmembrane protein 245		23.895	24.002	24.0275	23.7182	23.9316	23.9495	0.108424	0.569445
Q9Y2K1	ZBTB1_HUMAN	ZBTB1	Zinc finger and BTB domain-containing protein 1		21.1143	21.2989	21.3376	21.0493	21.2185	21.1581	0.108323	0.567396
Q9H4I2	ZHX3_HUMAN	ZHX3	Zinc fingers and homeoboxes protein 3		22.0625	22.2961	21.5498	21.5069	22.6649	21.4118	0.10827	0.0834585
Q9NR81	ARHG3_HUMAN	ARHGEF3	Rho guanine nucleotide exchange factor 3		17.952	17.6909	18.1056	17.7662	17.7264	17.9314	0.108191	0.326188
Q9H0N5	PHS2_HUMAN	PCBD2	Pterin-4-alpha-carbinolamine dehydratase 2		22.8113	23.2535	23.0576	22.9601	22.9334	22.9043	0.108184	0.348047
Q13432	U119A_HUMAN	UNC119	Protein unc-119 homolog A		22.0258	22.2096	22.1174	22.0426	21.9566	22.0292	0.108138	0.845446
Q9NQG5	RPR1B_HUMAN	RPRD1B	Regulation of nuclear pre-mRNA domain-containing protein 1B		24.317	24.5696	24.4425	24.317	24.3511	24.3376	0.107835	0.664016
Q8IW45	NNRD_HUMAN	NAXD	ATP-dependent (S)-NAD(P)H-hydrate dehydratase		24.2317	24.4614	24.4041	24.1332	24.3101	24.3307	0.107705	0.505364
Q9BPU9	B9D2_HUMAN	B9D2	B9 domain-containing protein 2		24.3239	24.417	24.6431	24.3444	24.5225	24.1946	0.107487	0.330206
O00592	PODXL_HUMAN	PODXL	Podocalyxin		24.6264	24.4105	24.5522	24.6375	24.2317	24.3975	0.107454	0.330886
Q6IQ49	SDE2_HUMAN	SDE2	Splicing regulator SDE2		23.2448	23.0241	23.0409	23.0376	23.0275	22.9225	0.10742	0.602058
Q9Y6A4	CFA20_HUMAN	CFAP20	Cilia- and flagella-associated protein 20		24.7441	24.8044	24.7441	24.7234	24.6264	24.6209	0.107276	1.2932
Q6ZV89	SH2D5_HUMAN	SH2D5	SH2 domain-containing protein 5		18.9925	18.8613	18.5613	18.9469	18.5628	18.5835	0.107265	0.236448
Q9BZG8	DPH1_HUMAN	DPH1	2-(3-amino-3-carboxypropyl)histidine synthase subunit 1		22.2273	22.1079	22.155	22.1111	21.9916	22.0658	0.107229	1.02372
Q9NVC6	MED17_HUMAN	MED17	Mediator of RNA polymerase II transcription subunit 17		23.1158	22.9777	23.0609	22.9933	22.9152	22.9243	0.107161	1.06892
O75554	WBP4_HUMAN	WBP4	WW domain-binding protein 4		22.7796	27.217	26.9203	27.0505	22.6475	26.8974	0.107155	0.0175062
Q14186	TFDP1_HUMAN	TFDP1	Transcription factor Dp-1		22.1886	22.0325	21.7634	22.2535	21.823	21.5869	0.107056	0.175536
P49354	FNTA_HUMAN	FNTA	Protein farnesyltransferase/geranylgeranyltransferase type-1 subunit alpha		24.5404	24.604	24.5812	24.3778	24.5105	24.5165	0.106898	1.02551
Q96I15	SCLY_HUMAN	SCLY	Selenocysteine lyase		21.8423	22.0526	22.0088	21.7512	21.8576	21.9742	0.106893	0.516424
P08962	CD63_HUMAN	CD63	CD63 antigen		27.9484	27.9484	27.9428	27.8564	28.003	27.6595	0.106884	0.46421
P13987	CD59_HUMAN	CD59	CD59 glycoprotein		29.4394	29.5898	29.5259	29.5128	29.3578	29.3641	0.106774	0.732279
Q13882	PTK6_HUMAN	PTK6	Protein-tyrosine kinase 6		23.895	23.8764	23.8288	23.8576	23.7796	23.6431	0.106694	0.745248
O95218	ZRAB2_HUMAN	ZRANB2	Zinc finger Ran-binding domain-containing protein 2		25.673	25.8528	25.7568	25.604	25.6096	25.7492	0.106623	0.689685
Q9UKZ1	CNO11_HUMAN	CNOT11	CCR4-NOT transcription complex subunit 11		23.2679	23.2679	23.2535	23.2096	23.0838	23.1765	0.10648	1.31395
Q96PC3	AP1S3_HUMAN	AP1S3	AP-1 complex subunit sigma-3		23.976	23.8764	23.7695	23.6971	23.6649	23.9406	0.10644	0.431818
Q9Y383	LC7L2_HUMAN	LUC7L2	Putative RNA-binding protein Luc7-like 2		26.1852	26.1253	26.0874	25.9847	26.0772	26.0169	0.106361	1.2691
Q9NPA8	ENY2_HUMAN	ENY2	Transcription and mRNA export factor ENY2		25.3135	25.2856	25.0567	25.0062	24.9933	25.3376	0.106238	0.312341
Q13163	MP2K5_HUMAN	MAP2K5	Dual specificity mitogen-activated protein kinase kinase 5		19.8244	20.1457	20.0156	19.5435	20.2764	19.8474	0.106157	0.173121
Q99590	SCAFB_HUMAN	SCAF11	Protein SCAF11		23.019	22.5777	22.7471	22.5333	22.8385	22.654	0.10605	0.272132
Q6NXR4	TTI2_HUMAN	TTI2	TELO2-interacting protein 2		22.6671	22.4726	22.3831	22.743	22.1488	22.3129	0.106032	0.20953
Q9P0P8	MRES1_HUMAN	MTRES1	Mitochondrial transcription rescue factor 1		22.5823	22.6562	22.6671	22.5638	22.5662	22.4576	0.106002	1.11742
Q8NHU3	SMS2_HUMAN	SGMS2	Phosphatidylcholine:ceramide cholinephosphotransferase 2		21.8191	22.2185	22.0789	21.7594	21.8876	22.1519	0.105836	0.255785
O94804	STK10_HUMAN	STK10	Serine/threonine-protein kinase 10		23.8093	23.867	23.8576	23.7389	23.7182	23.7594	0.105811	2.10325
Q9H7X7	IFT22_HUMAN	IFT22	Intraflagellar transport protein 22 homolog		23.3511	23.1174	23.5404	23.2535	23.2302	23.2081	0.105711	0.357913
P14373	TRI27_HUMAN	TRIM27	Zinc finger protein RFP		22.0054	21.9812	21.9423	22.1143	21.8307	21.6671	0.105613	0.329581
Q8NFT2	STEA2_HUMAN	STEAP2	Metalloreductase STEAP2		23.1704	23.3239	23.2346	22.9477	23.3376	23.1269	0.105558	0.363792
Q8NH04;P0C7T2	O2T27_HUMAN;OR2T7_HUMAN	OR2T27;OR2T7	Olfactory receptor 2T7		19.4983	19.2965	17.7155	18.3072	18.49	19.397	0.105401	0.0553862
Q9BRQ8	FSP1_HUMAN	AIFM2	Ferroptosis suppressor protein 1		24.1565	24.0275	24.0854	24.0105	23.9933	23.9495	0.105349	1.19312
O43766	LIAS_HUMAN	LIAS	Lipoyl synthase, mitochondrial		19.8275	19.6806	17.802	19.5123	19.1328	18.3491	0.10532	0.0490471
Q96LW7	CAR19_HUMAN	CARD19	Caspase recruitment domain-containing protein 19		24.2463	24.3578	24.2096	24.2317	24.1565	24.1095	0.105314	0.858179
Q00535	CDK5_HUMAN	CDK5	Cyclin-dependent kinase 5		24.7492	24.8044	24.7645	24.6971	24.7182	24.5869	0.105286	1.12797
Q9GZU7	CTDS1_HUMAN	CTDSP1	Carboxy-terminal domain RNA polymerase II polypeptide A small phosphatase 1		22.5961	22.5356	22.6453	22.391	22.6051	22.4651	0.105233	0.680033
Q96DE0	NUD16_HUMAN	NUDT16	U8 snoRNA-decapping enzyme		23.7796	23.8288	23.6649	23.7077	23.6865	23.5638	0.105111	0.728388
Q9NP97	DLRB1_HUMAN	DYNLRB1	Dynein light chain roadblock-type 1		25.9998	26.1391	26.1565	26.0317	25.9066	26.0422	0.104989	0.728346
Q9NVW2	RNF12_HUMAN	RLIM	E3 ubiquitin-protein ligase RLIM		20.3211	20.1206	19.9882	20.3321	19.7138	20.0691	0.104983	0.19835
P23443	KS6B1_HUMAN	RPS6KB1	Ribosomal protein S6 kinase beta-1		24.7286	24.7995	24.7895	24.6431	24.7389	24.6209	0.104914	1.16177
Q8TCT7	SPP2B_HUMAN	SPPL2B	Signal peptide peptidase-like 2B		22.7369	22.8839	22.9243	22.7223	22.7796	22.7286	0.10487	0.811847
Q9H7C9	AAMDC_HUMAN	AAMDC	Mth938 domain-containing protein		23.9672	24.2096	24.239	24.019	24.1871	23.895	0.104866	0.362426
A6NFQ2	TCAF2_HUMAN	TCAF2	TRPM8 channel-associated factor 2		24.5869	24.5105	24.7543	24.2961	24.5285	24.7129	0.104718	0.303375
Q9BT25	HAUS8_HUMAN	HAUS8	HAUS augmin-like complex subunit 8		22.6209	22.3778	22.3962	22.5938	22.3294	22.1581	0.104568	0.283029
Q9NSP4	CENPM_HUMAN	CENPM	Centromere protein M		21.0756	20.265	20.265	21.2477	20.0156	20.0292	0.104357	0.0748533
Q5RKV6	EXOS6_HUMAN	EXOSC6	Exosome complex component MTR3		24.3778	24.2891	24.2463	24.2961	24.1095	24.1946	0.104327	0.718198
O60331	PI51C_HUMAN	PIP5K1C	Phosphatidylinositol 4-phosphate 5-kinase type-1 gamma		23.8385	24.1565	23.867	23.7077	23.848	23.9933	0.10432	0.327923
Q15025	TNIP1_HUMAN	TNIP1	TNFAIP3-interacting protein 1		21.6096	21.4425	21.4324	21.4874	21.2419	21.4425	0.104239	0.476876
Q96G97	BSCL2_HUMAN	BSCL2	Seipin		22.9298	23.0224	23.1627	22.9584	22.8802	22.9637	0.104225	0.645945
Q12894	IFRD2_HUMAN	IFRD2	Interferon-related developmental regulator 2		20.9882	20.6276	20.5638	20.9098	20.7389	20.2185	0.104137	0.158516
Q9BRR3	PGAP4_HUMAN	PGAP4	Post-GPI attachment to proteins factor 4		22.2905	22.4898	22.3538	22.2243	22.155	22.4425	0.104098	0.424369
O60565	GREM1_HUMAN	GREM1	Gremlin-1		24.4862	23.867	24.1174	24.417	23.6971	24.0443	0.104085	0.140173
Q9UM00	TMCO1_HUMAN	TMCO1	Calcium load-activated calcium channel		25.4645	25.4984	25.6125	25.3578	25.4073	25.4984	0.103942	0.789049
Q99623	PHB2_HUMAN	PHB2	Prohibitin-2		28.6561	28.6355	28.5609	28.5052	28.5609	28.4746	0.103912	1.26985
Q7Z5G4	GOGA7_HUMAN	GOLGA7	Golgin subfamily A member 7		23.2821	23.3645	23.3101	23.2535	23.2258	23.1658	0.103864	1.3684
Q8N8F7	LSME1_HUMAN	LSMEM1	Leucine-rich single-pass membrane protein 1		18.6409	18.6239	18.6308	17.2352	17.8749	20.4741	0.103811	0.0354733
Q9BXJ8	TACAN_HUMAN	TMEM120A	Ion channel TACAN		22.1916	22.2707	22.5777	21.9134	22.3857	22.4298	0.103683	0.196321
Q9Y5K8	VATD_HUMAN	ATP6V1D	V-type proton ATPase subunit D		25.3273	25.2643	25.2643	25.2133	25.1332	25.1984	0.103682	1.48528
Q13242	SRSF9_HUMAN	SRSF9	Serine/arginine-rich splicing factor 9		26.4504	26.4877	26.425	26.3926	26.3359	26.3239	0.103583	1.68378
Q15059	BRD3_HUMAN	BRD3	Bromodomain-containing protein 3		22.4947	22.4701	22.4551	22.5045	22.343	22.2621	0.103461	0.647918
Q6DD87	ZN787_HUMAN	ZNF787	Zinc finger protein 787		23.1704	23.1734	23.0723	23.0443	23.0393	23.0224	0.103387	1.42205
P16591	FER_HUMAN	FER	Tyrosine-protein kinase Fer		22.6562	22.6342	22.6029	22.4476	22.5285	22.6074	0.103278	0.995407
Q8NFG4	FLCN_HUMAN	FLCN	Folliculin		21.7182	21.5498	21.5777	21.6276	21.4015	21.5069	0.103268	0.546569
Q8N6T7	SIR6_HUMAN	SIRT6	NAD-dependent protein deacylase sirtuin-6		22.2961	22.2877	22.2707	22.2361	22.1976	22.1111	0.103264	1.28401
P23467	PTPRB_HUMAN	PTPRB	Receptor-type tyrosine-protein phosphatase beta		21.6364	21.4825	21.4576	21.4825	21.3321	21.4526	0.103118	0.643194
Q9UKB1	FBW1B_HUMAN	FBXW11	F-box/WD repeat-containing protein 11		23.1174	25.452	22.9812	25.7441	22.4298	23.0674	0.103102	0.026729
P42695	CNDD3_HUMAN	NCAPD3	Condensin-2 complex subunit D3		24.4105	23.2961	23.2679	24.3578	23.2434	23.0641	0.103064	0.0649365
Q9Y3A3	PHOCN_HUMAN	MOB4	MOB-like protein phocein		24.5225	24.5812	24.6264	24.4551	24.48	24.4862	0.102957	1.5092
P09958	FURIN_HUMAN	FURIN	Furin		21.5309	21.4775	21.4425	21.2933	21.4526	21.3962	0.10292	0.90187
P63208	SKP1_HUMAN	SKP1	S-phase kinase-associated protein 1		27.0401	27.0813	27.1312	27.0084	26.8858	27.0505	0.102663	0.851703
P05106	ITB3_HUMAN	ITGB3	Integrin beta-3		21.1457	21.5685	21.68	21.1079	21.4476	21.5309	0.102615	0.188781
Q9BVQ7	AFG2B_HUMAN	AFG2B	ATPase family gene 2 protein homolog B		23.0173	22.8839	22.9006	22.9171	22.7995	22.7776	0.102574	0.784516
P36776	LONM_HUMAN	LONP1	Lon protease homolog, mitochondrial		26.6181	26.4892	26.4676	26.4707	26.2517	26.5448	0.102563	0.44136
O00142	KITM_HUMAN	TK2	Thymidine kinase 2, mitochondrial		24.4551	24.632	24.6431	24.3101	24.6264	24.4862	0.102504	0.393759
Q99549	MPP8_HUMAN	MPHOSPH8	M-phase phosphoprotein 8		22.743	22.7756	22.7223	22.6584	22.6364	22.6387	0.102481	2.4196
P51153	RAB13_HUMAN	RAB13	Ras-related protein Rab-13		25.7234	25.8167	25.9361	25.6998	25.7745	25.6944	0.102453	0.69966
Q9NPH0	PPA6_HUMAN	ACP6	Lysophosphatidic acid phosphatase type 6		21.343	21.4676	21.4726	21.2989	21.4825	21.1946	0.102397	0.470789
P36404	ARL2_HUMAN	ARL2	ADP-ribosylation factor-like protein 2		25.7645	25.4984	25.7466	25.6757	25.5345	25.4923	0.102336	0.427746
Q6P1J9	CDC73_HUMAN	CDC73	Parafibromin		24.2607	24.0526	24.0935	24.1488	23.9406	24.0105	0.102285	0.507052
P55199	ELL_HUMAN	ELL	RNA polymerase II elongation factor ELL		21.0625	20.9882	20.8876	20.9243	20.8423	20.8651	0.102166	0.84302
Q06830	PRDX1_HUMAN	PRDX1	Peroxiredoxin-1		30.9814	31.0084	31.1115	30.6798	31.0544	31.0609	0.102089	0.316394
O75817	POP7_HUMAN	POP7	Ribonuclease P protein subunit p20		23.2679	23.2036	23.2477	23.2006	23.1143	23.0983	0.102004	1.29186
P61088	UBE2N_HUMAN	UBE2N	Ubiquitin-conjugating enzyme E2 N		28.0137	27.8142	28.0609	27.8916	27.9146	27.7771	0.101863	0.515185
Q9H4G0	E41L1_HUMAN	EPB41L1	Band 4.1-like protein 1		24.0772	24.3712	24.4041	23.9134	24.3101	24.3239	0.101702	0.235124
Q01658	NC2B_HUMAN	DR1	Protein Dr1		25.3444	25.3511	25.2891	25.1946	25.1681	25.317	0.101638	0.953486
Q9BYG5	PAR6B_HUMAN	PARD6B	Partitioning defective 6 homolog beta		22.1488	22.1976	22.0292	21.9098	22.0821	22.0789	0.101606	0.600178
Q9NWR8	MCUB_HUMAN	MCUB	Calcium uniporter regulatory subunit MCUb, mitochondrial		23.0658	23.0139	22.9829	22.9795	22.8727	22.9061	0.101478	1.20045
Q6P9B9	INT5_HUMAN	INTS5	Integrator complex subunit 5		22.2736	22.265	22.2564	21.9916	22.1916	22.3073	0.101471	0.476882
Q9UBI6	GBG12_HUMAN	GNG12	Guanine nucleotide-binding protein G(I)/G(S)/G(O) subunit gamma-12		25.8312	26.0422	26.1135	25.7619	25.8599	26.0609	0.101387	0.343717
Q9P1T7	MDFIC_HUMAN	MDFIC	MyoD family inhibitor domain-containing protein		20.6186	20.6714	20.7715	20.4676	20.654	20.6364	0.10116	0.609517
Q9GZV5	WWTR1_HUMAN	WWTR1	WW domain-containing transcription regulator protein 1		25.6431	25.8741	26.0833	25.5492	25.8623	25.8858	0.101067	0.23806
Q3ZAQ7	VMA21_HUMAN	VMA21	Vacuolar ATPase assembly integral membrane protein VMA21		23.5983	23.4551	23.5754	23.7077	23.3645	23.2535	0.101061	0.283375
Q9P227	RHG23_HUMAN	ARHGAP23	Rho GTPase-activating protein 23		20.7389	20.3857	20.6364	20.4375	20.4476	20.5731	0.100983	0.372306
O95295	SNAPN_HUMAN	SNAPIN	SNARE-associated protein Snapin		22.5189	22.7244	22.391	22.6298	22.0393	22.6628	0.100854	0.169599
Q08999	RBL2_HUMAN	RBL2	Retinoblastoma-like protein 2		24.5463	24.6209	24.7286	24.2961	24.6595	24.6375	0.100851	0.320597
P14222	PERF_HUMAN	PRF1	Perforin-1		20.9812	21.1269	21.1143	20.9812	21.0292	20.9098	0.100746	0.801478
Q5JU69	TOR2A_HUMAN	TOR2A	Torsin-2A		24.0609	23.9584	24.0935	24.1946	23.7492	23.867	0.100618	0.292309
Q8IYL3	CA174_HUMAN	C1orf174	UPF0688 protein C1orf174		22.9116	22.937	22.8969	22.6387	22.7327	23.0723	0.100576	0.310449
P10412	H14_HUMAN	H1-4	Histone H1.4		29.4032	29.3971	29.2445	29.1263	29.2759	29.341	0.100561	0.541116
Q8NBI5	S43A3_HUMAN	SLC43A3	Equilibrative nucleobase transporter 1		22.2535	21.8576	21.6714	22.0918	21.7307	21.6584	0.100528	0.174986
P15884	ITF2_HUMAN	TCF4	Transcription factor 4		20.3101	20.3857	20.343	20.0951	20.3321	20.3101	0.100522	0.567513
Q96F46	I17RA_HUMAN	IL17RA	Interleukin-17 receptor A		21.502	21.4526	21.3805	21.3805	21.3376	21.3156	0.100491	1.17806
Q9P2W9	STX18_HUMAN	STX18	Syntaxin-18		23.8191	23.7796	23.9584	23.7492	23.6971	23.8093	0.100473	0.728216
Q9UNE7	CHIP_HUMAN	STUB1	E3 ubiquitin-protein ligase CHIP		24.6096	24.4738	24.5522	24.632	24.3511	24.3511	0.100467	0.421834
Q32P44	EMAL3_HUMAN	EML3	Echinoderm microtubule-associated protein-like 3		26.9316	26.9977	27.17	27.019	26.965	26.8142	0.100321	0.461856
Q13444	ADA15_HUMAN	ADAM15	Disintegrin and metalloproteinase domain-containing protein 15		23.4676	23.48	23.391	23.4041	23.2961	23.3376	0.10029	1.12336
O14641	DVL2_HUMAN	DVL2	Segment polarity protein dishevelled homolog DVL-2		23.654	23.5522	23.5045	23.5638	23.4041	23.4425	0.100074	0.698626
Q9H813	PACC1_HUMAN	PACC1	Proton-activated chloride channel		21.0426	20.9882	21.0625	21.1395	20.8269	20.8269	0.100016	0.396853
Q15262	PTPRK_HUMAN	PTPRK	Receptor-type tyrosine-protein phosphatase kappa		23.5983	23.6757	23.6971	23.4425	23.5638	23.6649	0.0999565	0.635181
Q9H461	FZD8_HUMAN	FZD8	Frizzled-8		18.0312	17.8573	17.7906	17.2409	17.8346	18.3038	0.09994	0.114948
Q8NEF9	SRFB1_HUMAN	SRFBP1	Serum response factor-binding protein 1		23.4041	23.181	23.2258	23.2521	23.1916	23.0674	0.0999374	0.501173
Q9BVM2	DPCD_HUMAN	DPCD	Protein DPCD		25.341	25.5551	25.6096	25.1795	25.5433	25.4831	0.0999241	0.290073
O00303	EIF3F_HUMAN	EIF3F	Eukaryotic translation initiation factor 3 subunit F		27.1984	26.8741	26.9869	26.9869	26.7645	27.0084	0.099865	0.335199
P50452	SPB8_HUMAN	SERPINB8	Serpin B8		24.989	24.9716	24.9539	24.8717	24.8858	24.8576	0.0998236	2.81143
Q15020	SART3_HUMAN	SART3	Squamous cell carcinoma antigen recognized by T-cells 3		24.6703	24.7077	24.6811	24.5463	24.5869	24.6264	0.0998211	1.75196
Q9Y4D7	PLXD1_HUMAN	PLXND1	Plexin-D1		20.265	20.3321	20.4972	20.4067	20.1581	20.2302	0.0997683	0.420955
P61018	RAB4B_HUMAN	RAB4B	Ras-related protein Rab-4B		23.1886	23.3511	23.3239	23.1581	23.2214	23.1856	0.0995115	0.865255
Q969Q0	RL36L_HUMAN	RPL36AL	Ribosomal protein eL42-like		27.4154	27.3239	27.4154	27.3239	27.3153	27.217	0.0995083	1.01773
Q9NYR9	KBRS2_HUMAN	NKIRAS2	NF-kappa-B inhibitor-interacting Ras-like protein 2		22.0658	21.8764	21.9672	21.8576	21.9388	21.8152	0.0992953	0.688851
Q96R06	SPAG5_HUMAN	SPAG5	Sperm-associated antigen 5		21.7756	20.3101	20.5915	21.9388	20.3857	20.0559	0.0989068	0.0460942
Q9UM22	EPDR1_HUMAN	EPDR1	Mammalian ependymin-related protein 1		21.1704	21.5117	21.6453	21.3592	21.2243	21.4476	0.0987415	0.251698
P61599	NAA20_HUMAN	NAA20	N-alpha-acetyltransferase 20		23.6431	23.5869	23.5754	23.5285	23.417	23.5638	0.09869	0.943404
Q8NI36	WDR36_HUMAN	WDR36	WD repeat-containing protein 36		25.1015	24.8858	24.8811	24.9406	24.7695	24.8623	0.0986621	0.488694
Q53GS9	UBP39_HUMAN	USP39	Ubiquitin carboxyl-terminal hydrolase 39		25.0935	25.3877	24.8385	25.0975	24.8288	25.0975	0.0986207	0.209652
Q9P032	NDUF4_HUMAN	NDUFAF4	NADH dehydrogenase [ubiquinone] 1 alpha subcomplex assembly factor 4		24.1015	23.8858	23.895	23.7695	23.9316	23.8858	0.0984853	0.504746
Q8WYA6	CTBL1_HUMAN	CTNNBL1	Beta-catenin-like protein 1		25.5783	25.5433	25.5225	25.452	25.417	25.48	0.0983925	1.80201
Q8TCD1	CR032_HUMAN	C18orf32	UPF0729 protein C18orf32		25.6838	25.7771	25.7945	25.6096	25.4892	25.8623	0.0980625	0.354061
Q6P1X5	TAF2_HUMAN	TAF2	Transcription initiation factor TFIID subunit 2		22.1174	21.9171	21.7756	21.9672	21.68	21.8689	0.0979741	0.306774
Q86U44	MTA70_HUMAN	METTL3	N6-adenosine-methyltransferase catalytic subunit		24.1642	24.141	24.0772	24.0935	24.0105	23.9847	0.0979468	1.10006
Q9GZP4	PITH1_HUMAN	PITHD1	PITH domain-containing protein 1		24.7796	24.632	24.6649	24.558	24.6209	24.604	0.097875	0.943922
Q8TEB9	RHBL4_HUMAN	RHBDD1	Rhomboid-related protein 4		18.6256	18.929	18.875	18.7089	18.6844	18.7427	0.0978737	0.442584
Q99598	TSNAX_HUMAN	TSNAX	Translin-associated protein X		25.9539	25.9539	26.0148	25.9361	25.8312	25.8623	0.097683	1.23586
Q9P299	COPZ2_HUMAN	COPZ2	Coatomer subunit zeta-2		23.2405	23.4425	23.4041	23.217	23.2125	23.3645	0.0976721	0.542179
Q13123	RED_HUMAN	IK	Protein Red		24.2961	24.2679	24.317	24.275	24.1565	24.1565	0.0976493	1.09392
Q15831	STK11_HUMAN	STK11	Serine/threonine-protein kinase STK11		21.391	21.4874	21.6843	21.3962	21.4775	21.3962	0.0975641	0.466559
O15066	KIF3B_HUMAN	KIF3B	Kinesin-like protein KIF3B		23.4425	23.3101	23.391	23.2448	23.3101	23.2961	0.0975253	1.057
Q96EV2	RBM33_HUMAN	RBM33	RNA-binding protein 33		21.3156	21.3962	21.3211	21.1886	21.2477	21.3045	0.0973911	1.08018
P25789	PSA4_HUMAN	PSMA4	Proteasome subunit alpha type-4		27.9705	27.9869	28.0084	27.8504	27.9203	27.9031	0.0973085	1.83015
Q9NY93	DDX56_HUMAN	DDX56	Probable ATP-dependent RNA helicase DDX56		24.4041	24.141	24.2021	24.2607	24.0772	24.1174	0.0972672	0.42842
Q9ULC4	MCTS1_HUMAN	MCTS1	Malignant T-cell-amplified sequence 1		26.726	26.8504	26.8504	26.6458	26.7895	26.6998	0.0972436	0.758161
P41212	ETV6_HUMAN	ETV6	Transcription factor ETV6		21.7265	21.9134	21.9742	21.6364	21.7876	21.8987	0.0971343	0.383885
O15111	IKKA_HUMAN	CHUK	Inhibitor of nuclear factor kappa-B kinase subunit alpha		23.391	23.3511	23.2961	23.2961	23.2051	23.2463	0.0969194	1.19667
Q9ULH0	KDIS_HUMAN	KIDINS220	Kinase D-interacting substrate of 220 kDa		22.7695	22.7655	22.7369	22.7675	22.5662	22.6475	0.0969086	0.74965
O94955	RHBT3_HUMAN	RHOBTB3	Rho-related BTB domain-containing protein 3		23.3376	23.0772	23.2535	23.2961	23.019	23.0625	0.0968768	0.34876
Q9NS15	LTBP3_HUMAN	LTBP3	Latent-transforming growth factor beta-binding protein 3		22.8014	23.391	23.4298	22.6029	23.3645	23.3645	0.0967801	0.107428
P43234	CATO_HUMAN	CTSO	Cathepsin O		19.4283	20.343	20.1206	19.6185	20.0951	19.8883	0.0966466	0.113849
P57740	NU107_HUMAN	NUP107	Nuclear pore complex protein Nup107		26.3153	26.1833	25.9998	26.065	25.976	26.1681	0.0964597	0.378543
P14406	CX7A2_HUMAN	COX7A2	Cytochrome c oxidase subunit 7A2, mitochondrial		25.5754	25.4583	25.5345	25.4041	25.4614	25.4138	0.0963078	1.17227
Q9Y3A6	TMED5_HUMAN	TMED5	Transmembrane emp24 domain-containing protein 5		25.7363	25.8019	25.7821	25.6918	25.6348	25.705	0.0962461	1.53102
Q86VX2	COMD7_HUMAN	COMMD7	COMM domain-containing protein 7		22.9882	22.8913	22.7915	22.8404	22.8538	22.6886	0.0960967	0.547472
Q9BZ23	PANK2_HUMAN	PANK2	Pantothenate kinase 2, mitochondrial		20.895	20.8034	20.9171	20.9171	20.6714	20.7389	0.0960375	0.520021
Q6P2P2	ANM9_HUMAN	PRMT9	Protein arginine N-methyltransferase 9		25.2353	25.2926	25.3645	25.0813	25.3135	25.2096	0.0960337	0.553463
O95340	PAPS2_HUMAN	PAPSS2	Bifunctional 3'-phosphoadenosine 5'-phosphosulfate synthase 2		27.019	26.965	27.0401	26.965	26.9088	26.8623	0.0959899	1.21353
Q9H334	FOXP1_HUMAN	FOXP1	Forkhead box protein P1		23.0723	22.9189	22.937	22.867	22.8783	22.895	0.0959447	0.912259
Q9UHF7	TRPS1_HUMAN	TRPS1	Zinc finger transcription factor Trps1		20.7876	20.8423	20.6628	20.7471	20.5356	20.7223	0.0958277	0.489187
O75381	PEX14_HUMAN	PEX14	Peroxisomal membrane protein PEX14		24.4551	24.4676	24.5225	24.239	24.5345	24.3844	0.095801	0.473153
Q9BX95	SGPP1_HUMAN	SGPP1	Sphingosine-1-phosphate phosphatase 1		25.1253	23.2477	23.3101	25.2961	22.9171	23.1825	0.0957985	0.0332644
P08579	RU2B_HUMAN	SNRPB2	U2 small nuclear ribonucleoprotein B''		26.2225	26.1661	26.1469	26.1253	26.0955	26.0275	0.0957375	1.22264
Q96MX0	CKLF3_HUMAN	CMTM3	CKLF-like MARVEL transmembrane domain-containing protein 3		24.1642	24.4234	24.4234	23.976	24.3778	24.3712	0.0953643	0.236726
Q96EU7	C1GLC_HUMAN	C1GALT1C1	C1GALT1-specific chaperone 1		24.1642	24.019	23.9584	23.9933	23.9043	23.9584	0.095218	0.648679
Q15554	TERF2_HUMAN	TERF2	Telomeric repeat-binding factor 2		22.4041	22.4849	22.3348	22.3101	22.2905	22.3376	0.095218	0.98161
Q9H147	TDIF1_HUMAN	DNTTIP1	Deoxynucleotidyltransferase terminal-interacting protein 1		21.6886	21.714	21.7512	21.6006	21.6671	21.6006	0.0951742	1.5316
Q6PID8	KLD10_HUMAN	KLHDC10	Kelch domain-containing protein 10		19.4976	19.2498	19.454	19.3724	19.0987	19.4464	0.0946287	0.293839
P51948	MAT1_HUMAN	MNAT1	CDK-activating kinase assembly factor MAT1		23.0707	22.85	22.8839	22.9316	22.8689	22.7203	0.0946102	0.436248
A1X283	SPD2B_HUMAN	SH3PXD2B	SH3 and PX domain-containing protein 2B		24.4676	24.7695	24.8717	24.5285	24.6757	24.6209	0.0945886	0.298339
Q8N8Z6	DCBD1_HUMAN	DCBLD1	Discoidin, CUB and LCCL domain-containing protein 1		23.48	23.3511	23.3645	23.391	23.2679	23.2535	0.0944303	0.722235
Q9UKS6	PACN3_HUMAN	PACSIN3	Protein kinase C and casein kinase substrate in neurons protein 3		24.632	24.5926	24.5165	24.5754	24.4984	24.3844	0.094312	0.656626
Q9BUB7	TMM70_HUMAN	TMEM70	Transmembrane protein 70, mitochondrial		24.4298	24.3307	24.2463	24.2243	24.2317	24.2679	0.0943101	0.796157
O95183	VAMP5_HUMAN	VAMP5	Vesicle-associated membrane protein 5		23.8191	24.1946	24.0691	23.848	23.9672	23.9847	0.0942841	0.327431
P04406	G3P_HUMAN	GAPDH	Glyceraldehyde-3-phosphate dehydrogenase		33.4702	33.6198	33.5641	33.3033	33.4702	33.5978	0.0942637	0.419382
Q9Y5Q8	TF3C5_HUMAN	GTF3C5	General transcription factor 3C polypeptide 5		24.0526	23.9316	24.019	23.9495	23.8576	23.9134	0.0942345	0.983781
P48444	COPD_HUMAN	ARCN1	Coatomer subunit delta		27.5826	27.7325	27.7195	27.509	27.611	27.632	0.094169	0.702269
Q7Z7H8	RM10_HUMAN	MRPL10	Large ribosomal subunit protein uL10m		22.7013	22.6929	22.6562	22.5983	22.6606	22.5093	0.0940698	0.956732
Q9NPB8	GPCP1_HUMAN	GPCPD1	Glycerophosphocholine phosphodiesterase GPCPD1		20.4676	20.68	20.6628	20.6628	20.265	20.6006	0.0940208	0.266348
Q9NVZ3	NECP2_HUMAN	NECAP2	Adaptin ear-binding coat-associated protein 2		25.0105	25.1015	25.1371	24.918	24.976	25.0732	0.0940075	0.73104
Q6ZN30	BNC2_HUMAN	BNC2	Zinc finger protein basonuclin-2		22.1395	22.0459	22.0658	22.0526	21.9566	21.9601	0.0939554	1.04116
O00170	AIP_HUMAN	AIP	AH receptor-interacting protein		25.8069	25.9694	25.8927	25.7466	25.8336	25.8069	0.0939484	0.812145
Q9UPN4	CP131_HUMAN	CEP131	Centrosomal protein of 131 kDa		25.0854	24.8044	24.7234	25.0401	24.6649	24.6264	0.0938969	0.212329
Q9NZC3	GDE1_HUMAN	GDE1	Glycerophosphodiester phosphodiesterase 1		23.4923	23.5404	23.5638	23.2961	23.5638	23.4551	0.093797	0.510232
O96008	TOM40_HUMAN	TOMM40	Mitochondrial import receptor subunit TOM40 homolog		26.1332	26.1273	26.141	26.2571	26.0127	25.8504	0.0937831	0.325926
O43760	SNG2_HUMAN	SYNGR2	Synaptogyrin-2		26.2732	26.2996	26.3135	26.1814	26.2225	26.2021	0.0934607	2.29511
O60502	OGA_HUMAN	OGA	Protein O-GlcNAcase		26.2021	26.1312	26.1642	26.0691	26.0691	26.0793	0.0933793	1.96563
Q9NSC5	HOME3_HUMAN	HOMER3	Homer protein homolog 3		24.2821	24.1332	24.1015	24.1565	24.0443	24.0359	0.0933507	0.617633
O00255	MEN1_HUMAN	MEN1	Menin		24.0691	23.9134	23.8858	23.9672	23.7077	23.9134	0.0933247	0.405881
Q9UI26	IPO11_HUMAN	IPO11	Importin-11		24.239	24.141	24.141	24.2463	23.9847	24.0105	0.0931918	0.448446
O14562	UBFD1_HUMAN	UBFD1	Ubiquitin domain-containing protein UBFD1		25.0567	25.0975	25.1293	24.9406	25.0233	25.0401	0.093188	1.17644
Q92793	CBP_HUMAN	CREBBP	CREB-binding protein		23.7182	23.6865	23.7594	23.6209	23.654	23.6096	0.0931555	1.69299
Q53S33	BOLA3_HUMAN	BOLA3	BolA-like protein 3		23.0054	22.9548	22.8461	22.8764	22.8895	22.7614	0.0930061	0.680106
O94923	GLCE_HUMAN	GLCE	D-glucuronyl C5-epimerase		23.4551	23.5045	23.4923	23.4041	23.391	23.3778	0.092996	2.29697
Q969J3	BORC5_HUMAN	BORCS5	BLOC-1-related complex subunit 5		23.1961	23.2155	23.2821	23.1127	23.1332	23.1688	0.0929871	1.40799
Q9UDY2	ZO2_HUMAN	TJP2	Tight junction protein ZO-2		24.632	24.4425	24.4234	24.558	24.3376	24.3239	0.0928345	0.387491
Q9H6E5	STPAP_HUMAN	TUT1	Speckle targeted PIP5K1A-regulated poly(A) polymerase		22.7816	22.4551	22.4923	22.3699	22.2736	22.8073	0.0927391	0.182086
P03905	NU4M_HUMAN	MT-ND4	NADH-ubiquinone oxidoreductase chain 4		24.3578	24.7796	24.3975	24.391	24.5696	24.2961	0.0927194	0.232467
Q96BD5	PF21A_HUMAN	PHF21A	PHD finger protein 21A		21.0224	21.2989	21.0493	20.5069	21.3321	21.2535	0.0927137	0.122101
Q9ULA0	DNPEP_HUMAN	DNPEP	Aspartyl aminopeptidase		24.6375	24.6757	24.6486	24.5105	24.5638	24.6096	0.092617	1.40117
P49840	GSK3A_HUMAN	GSK3A	Glycogen synthase kinase-3 alpha		23.7895	23.5404	23.5754	23.632	23.4551	23.5404	0.0926119	0.424479
Q9BQJ4	TMM47_HUMAN	TMEM47	Transmembrane protein 47		22.7574	22.7182	22.7715	22.5823	22.7796	22.6074	0.0925884	0.654414
Q9BQ70	TCF25_HUMAN	TCF25	Ribosome quality control complex subunit TCF25		24.5696	24.6209	24.5926	24.5045	24.4488	24.5522	0.092563	1.30152
Q8N543	OGFD1_HUMAN	OGFOD1	Prolyl 3-hydroxylase OGFOD1		23.9316	23.2521	23.4425	23.8576	23.2821	23.2096	0.0923208	0.116545
Q02878	RL6_HUMAN	RPL6	Large ribosomal subunit protein eL6		29.49	29.3787	29.4073	29.3599	29.3066	29.3324	0.0923208	1.18083
Q86YN1	DOPP1_HUMAN	DOLPP1	Dolichyldiphosphatase 1		23.48	23.4041	23.3778	23.1127	23.4298	23.4425	0.092289	0.340239
Q9NRG9	AAAS_HUMAN	AAAS	Aladin		25.7466	25.5463	25.5135	25.6012	25.4862	25.4425	0.0921942	0.457914
Q8NFP9	NBEA_HUMAN	NBEA	Neurobeachin		22.1426	22.5285	22.5615	21.9985	22.4726	22.4849	0.092186	0.16616
Q6P9B6	MEAK7_HUMAN	MEAK7	MTOR-associated protein MEAK7		26.1352	26.1332	26.1449	26.038	26.0359	26.0629	0.0921535	3.21687
P48060	GLIP1_HUMAN	GLIPR1	Glioma pathogenesis-related protein 1		24.6209	24.5522	24.48	24.4614	24.4984	24.417	0.0920862	0.915224
Q92804	RBP56_HUMAN	TAF15	TATA-binding protein-associated factor 2N		28.8564	28.8593	28.7895	28.7613	28.7292	28.7389	0.0919431	1.6905
P36639	8ODP_HUMAN	NUDT1	Oxidized purine nucleoside triphosphate hydrolase		24.5926	24.4676	24.3376	24.5869	24.2891	24.2463	0.0918369	0.284937
Q8IY22	CMIP_HUMAN	CMIP	C-Maf-inducing protein		22.5237	22.5261	22.4349	22.5754	22.3239	22.3101	0.0917905	0.429861
Q9NY64	SL2A8_HUMAN	SLC2A8	Solute carrier family 2, facilitated glucose transporter member 8		19.3835	19.9882	20.3645	20.1206	19.7972	19.5431	0.0917721	0.0994532
Q9BT43	RPC7L_HUMAN	POLR3GL	DNA-directed RNA polymerase III subunit RPC7-like		19.902	20.0951	20.265	20.0426	19.8883	20.0559	0.0917257	0.318894
Q96PM5	ZN363_HUMAN	RCHY1	RING finger and CHY zinc finger domain-containing protein 1		22.6843	22.7955	22.68	22.741	22.5117	22.632	0.0917155	0.529708
O00391	QSOX1_HUMAN	QSOX1	Sulfhydryl oxidase 1		23.7695	23.7389	23.7389	23.6209	23.6865	23.6649	0.0917041	1.86373
P55211	CASP9_HUMAN	CASP9	Caspase-9		24.0275	23.848	23.6649	23.7492	23.6971	23.8191	0.0916907	0.343703
Q8TCE6	DEN10_HUMAN	DENND10	DENN domain-containing protein 10		23.9406	23.9584	23.976	23.8385	23.8576	23.9043	0.0915337	1.84596
Q5XPI4	RN123_HUMAN	RNF123	E3 ubiquitin-protein ligase RNF123		24.7077	24.7594	24.6153	24.5345	24.6811	24.5926	0.0913785	0.694308
Q9ULU4	ZMYD8_HUMAN	ZMYND8	MYND-type zinc finger-containing chromatin reader ZMYND8		24.1174	24.0935	24.0772	24.0275	24.002	23.9847	0.0913353	2.23166
Q86WT1	IT70A_HUMAN	IFT70A	Intraflagellar transport protein 70A		21.4874	21.4825	21.5451	21.3645	21.5498	21.3266	0.0913296	0.56477
Q8WW12	PCNP_HUMAN	PCNP	PEST proteolytic signal-containing nuclear protein		26.002	25.9781	25.9672	25.9562	25.8599	25.8576	0.091212	1.25704
Q13472	TOP3A_HUMAN	TOP3A	DNA topoisomerase 3-alpha		23.0393	22.5404	22.4144	22.9406	22.538	22.2419	0.0911916	0.119473
Q9BUL8	PDC10_HUMAN	PDCD10	Programmed cell death protein 10		26.4629	26.4738	26.48	26.3778	26.3877	26.3778	0.0911382	3.96694
Q9H2W6	RM46_HUMAN	MRPL46	Large ribosomal subunit protein mL46		24.4488	24.3975	24.3844	24.3307	24.2961	24.3307	0.0910651	1.79096
P05026	AT1B1_HUMAN	ATP1B1	Sodium/potassium-transporting ATPase subunit beta-1		26.4754	26.4441	26.5595	26.341	26.3943	26.4707	0.0909964	0.82634
Q2PZI1	D19L1_HUMAN	DPY19L1	Protein C-mannosyl-transferase DPY19L1		24.3578	24.4862	24.5105	24.2679	24.3778	24.4362	0.0908775	0.593996
Q9HAB3	S52A2_HUMAN	SLC52A2	Solute carrier family 52, riboflavin transporter, member 2		22.9619	22.8764	22.9829	22.9637	22.7816	22.8034	0.0908744	0.618702
O95361	TRI16_HUMAN	TRIM16	Tripartite motif-containing protein 16		24.9361	24.3444	24.5696	24.3101	24.6865	24.5812	0.0907809	0.166382
Q6NZ67	MZT2B_HUMAN	MZT2B	Mitotic-spindle organizing protein 2B		22.343	22.2185	22.2302	22.3565	22.0054	22.1581	0.0905717	0.343724
Q92688	AN32B_HUMAN	ANP32B	Acidic leucine-rich nuclear phosphoprotein 32 family member B		28.1747	28.2216	28.2216	27.976	28.1214	28.249	0.0905266	0.490568
Q9NPI7	KRCC1_HUMAN	KRCC1	Lysine-rich coiled-coil protein 1		19.0343	18.8652	19.0561	18.9397	18.7283	19.0159	0.0905259	0.359054
Q2TAA5	ALG11_HUMAN	ALG11	GDP-Man:Man(3)GlcNAc(2)-PP-Dol alpha-1,2-mannosyltransferase		23.0542	23.0772	23.1143	22.8595	23.0707	23.0443	0.0904344	0.587589
O43520	AT8B1_HUMAN	ATP8B1	Phospholipid-transporting ATPase IC		24.1795	24.002	23.9933	24.0772	23.9316	23.895	0.0903149	0.475942
P48507	GSH0_HUMAN	GCLM	Glutamate--cysteine ligase regulatory subunit		25.019	24.9672	25.0854	24.9043	24.848	25.0484	0.0902869	0.585788
Q9BV94	EDEM2_HUMAN	EDEM2	ER degradation-enhancing alpha-mannosidase-like protein 2		19.8945	19.9316	19.9201	19.7407	19.8524	19.8825	0.0902061	0.948235
P12956	XRCC6_HUMAN	XRCC6	X-ray repair cross-complementing protein 6		28.4073	28.3787	28.4032	28.3452	28.267	28.3066	0.0901457	1.68518
Q9UL03	INT6_HUMAN	INTS6	Integrator complex subunit 6		22.502	22.6886	22.5846	22.4551	22.5117	22.538	0.0901318	0.692771
Q9UN37	VPS4A_HUMAN	VPS4A	Vacuolar protein sorting-associated protein 4A		25.341	25.2714	25.239	25.2317	25.1214	25.228	0.0900885	0.892801
O75928	PIAS2_HUMAN	PIAS2	E3 SUMO-protein ligase PIAS2		22.2679	21.9352	22.0258	21.9495	22.0493	21.9601	0.0899792	0.359906
Q0JRZ9	FCHO2_HUMAN	FCHO2	F-BAR domain only protein 2		23.3645	23.5165	23.4676	23.3376	23.4041	23.3376	0.0898342	0.833583
P56134	ATPK_HUMAN	ATP5MF	ATP synthase subunit f, mitochondrial		27.1507	27.17	27.2077	26.9869	27.1312	27.141	0.0897636	0.787996
Q9H201	EPN3_HUMAN	EPN3	Epsin-3		20.0426	20.9951	20.7715	20.2989	20.7634	20.4775	0.0897598	0.101486
Q5T1V6	DDX59_HUMAN	DDX59	Probable ATP-dependent RNA helicase DDX59		20.5451	20.654	20.5451	20.5165	20.5731	20.3857	0.0896155	0.605681
Q9Y6Q9	NCOA3_HUMAN	NCOA3	Nuclear receptor coactivator 3		21.654	21.6141	21.5498	21.6628	21.3752	21.5117	0.0894464	0.432995
Q96FZ5	CKLF7_HUMAN	CMTM7	CKLF-like MARVEL transmembrane domain-containing protein 7		24.6595	24.7645	24.7441	24.6264	24.8576	24.417	0.0889994	0.271766
Q9BW71	HIRP3_HUMAN	HIRIP3	HIRA-interacting protein 3		24.019	23.7492	23.5165	23.9406	23.6096	23.4676	0.0889784	0.166211
Q8N954	GPT11_HUMAN	GPATCH11	G patch domain-containing protein 11		21.7098	21.4273	21.3752	21.6364	21.2877	21.3211	0.0889765	0.229106
Q9H920	RN121_HUMAN	RNF121	E3 ubiquitin ligase RNF121		23.2821	23.3778	23.417	23.178	23.2679	23.3645	0.088843	0.591233
Q9Y584	TIM22_HUMAN	TIMM22	Mitochondrial import inner membrane translocase subunit Tim22		22.7975	22.6779	22.6096	22.6096	22.5638	22.6453	0.0887559	0.67456
Q5JVL4	EFHC1_HUMAN	EFHC1	EF-hand domain-containing protein 1		19.0273	19.114	19.0232	18.9368	19.0987	18.8627	0.08874	0.513996
O00442	RTCA_HUMAN	RTCA	RNA 3'-terminal phosphate cyclase		24.654	24.7995	24.7995	24.6153	24.7286	24.6431	0.0886847	0.680059
P14174	MIF_HUMAN	MIF	Macrophage migration inhibitory factor		29.5591	29.7309	29.8339	29.5591	29.5826	29.7162	0.0886567	0.399473
P49116	NR2C2_HUMAN	NR2C2	Nuclear receptor subfamily 2 group C member 2		21.1946	21.1642	20.9171	21.0756	20.9742	20.9601	0.0886447	0.393491
Q7Z5J4	RAI1_HUMAN	RAI1	Retinoic acid-induced protein 1		26.7389	26.7129	26.7645	26.6181	26.673	26.6595	0.0885728	1.78605
Q9H8Y5	ANKZ1_HUMAN	ANKZF1	tRNA endonuclease ANKZF1		22.4067	22.4947	22.48	22.3348	22.2792	22.502	0.0884279	0.540133
Q13098	CSN1_HUMAN	GPS1	COP9 signalosome complex subunit 1		26.2262	26.141	26.2021	26.0955	26.0793	26.1293	0.088426	1.4056
Q99958	FOXC2_HUMAN	FOXC2	Forkhead box protein C2		23.391	23.1946	23.417	23.4551	22.5961	23.6865	0.0883204	0.0929411
P0CAP2	GRL1A_HUMAN	POLR2M	DNA-directed RNA polymerase II subunit GRINL1A		21.0559	20.9742	20.8727	20.6971	21.002	20.9388	0.0883191	0.341685
Q5H9U9	DDX6L_HUMAN	DDX60L	Probable ATP-dependent RNA helicase DDX60-like		20.7307	20.9459	20.8802	20.6714	20.7553	20.8651	0.0882912	0.447412
P35249	RFC4_HUMAN	RFC4	Replication factor C subunit 4		25.7821	25.4425	25.4041	25.7129	25.341	25.3101	0.0882289	0.191413
A7KAX9	RHG32_HUMAN	ARHGAP32	Rho GTPase-activating protein 32		22.5165	21.9672	22.5093	21.823	22.3511	22.5545	0.088143	0.112535
Q15084	PDIA6_HUMAN	PDIA6	Protein disulfide-isomerase A6		29.2759	29.5033	29.4862	29.1747	29.3599	29.4668	0.0879428	0.32093
Q70Z53	F10C1_HUMAN	FRA10AC1	Protein FRA10AC1		22.0691	21.9243	22.1174	22.0789	21.7836	21.9847	0.0879078	0.348583
Q6NVY1	HIBCH_HUMAN	HIBCH	3-hydroxyisobutyryl-CoA hydrolase, mitochondrial		25.4862	25.6012	25.4707	25.3844	25.4738	25.4362	0.0878677	0.838435
Q96P16	RPR1A_HUMAN	RPRD1A	Regulation of nuclear pre-mRNA domain-containing protein 1A		24.0691	24.002	24.1095	24.0105	23.9933	23.9134	0.0877438	0.947265
Q38SD2	LRRK1_HUMAN	LRRK1	Leucine-rich repeat serine/threonine-protein kinase 1		26.5898	26.4676	26.604	26.3612	26.4707	26.5667	0.0875804	0.524041
P02786	TFR1_HUMAN	TFRC	Transferrin receptor protein 1		27.4154	27.0914	26.5374	27.3662	26.976	26.4394	0.0875727	0.0834705
Q4G0X4	KCD21_HUMAN	KCTD21	BTB/POZ domain-containing protein KCTD21		21.7995	22.1047	22.0691	21.68	22.0918	21.9388	0.0875327	0.221674
Q9P2X3	IMPCT_HUMAN	IMPACT	Protein IMPACT		23.6096	23.6865	23.5638	23.5285	23.5285	23.5404	0.0875161	1.14354
Q8N0Z6	TTC5_HUMAN	TTC5	Tetratricopeptide repeat protein 5		23.48	23.417	23.3778	23.3239	23.3239	23.3645	0.0875079	1.25601
Q9Y5Z0	BACE2_HUMAN	BACE2	Beta-secretase 2		21.2877	21.0951	21.1886	21.0625	21.1079	21.1395	0.087169	0.658504
O75882	ATRN_HUMAN	ATRN	Attractin		22.68	22.7574	22.7876	22.5938	22.6497	22.7203	0.0870851	0.830376
Q8N3E9	PLCD3_HUMAN	PLCD3	1-phosphatidylinositol 4,5-bisphosphate phosphodiesterase delta-3		23.1673	23.8764	23.7492	23.0241	23.7895	23.7182	0.0870285	0.0949796
Q99666	RGPD5_HUMAN	RGPD6	RANBP2-like and GRIP domain-containing protein 5/6		18.4368	18.5107	18.0878	18.588	18.145	18.0414	0.0869948	0.153012
Q8TAF3	WDR48_HUMAN	WDR48	WD repeat-containing protein 48		22.9725	22.9388	22.8969	22.7955	22.9079	22.8442	0.0868193	1.04006
Q9Y2I1	NISCH_HUMAN	NISCH	Nischarin		22.6865	22.6929	22.7856	22.5404	22.6693	22.695	0.0867532	0.685654
Q5BJH2	TM128_HUMAN	TMEM128	Transmembrane protein 128		22.1916	22.1704	22.2535	22.1238	22.1301	22.1015	0.0867093	1.51741
Q9Y303	NAGA_HUMAN	AMDHD2	N-acetylglucosamine-6-phosphate deacetylase		22.5069	22.3857	22.2849	22.2564	22.3565	22.3045	0.0867081	0.544495
P78536	ADA17_HUMAN	ADAM17	Disintegrin and metalloproteinase domain-containing protein 17		24.6918	24.7995	24.8093	24.6096	24.7338	24.6971	0.0866877	0.756892
Q8ND04	SMG8_HUMAN	SMG8	Nonsense-mediated mRNA decay factor SMG8		22.5869	22.5777	22.6562	22.5141	22.4923	22.5545	0.0866553	1.31928
Q9UHC7	MKRN1_HUMAN	MKRN1	E3 ubiquitin-protein ligase makorin-1		20.2535	20.3538	20.3962	20.2302	20.1704	20.343	0.0866528	0.586201
P07948	LYN_HUMAN	LYN	Tyrosine-protein kinase Lyn		26.8385	26.7517	26.726	26.7517	26.6865	26.6181	0.0866394	0.776092
Q9BSQ5	CCM2_HUMAN	CCM2	Cerebral cavernous malformations 2 protein		22.239	22.2361	22.2273	22.1174	22.1488	22.1765	0.0865587	2.11696
P40424	PBX1_HUMAN	PBX1	Pre-B-cell leukemia transcription factor 1		19.3742	19.674	19.6085	19.0841	19.6512	19.6618	0.0865523	0.152918
Q9Y3D9	RT23_HUMAN	MRPS23	Small ribosomal subunit protein mS23		24.3844	24.3376	24.275	24.2821	24.2607	24.1946	0.0865345	0.984362
Q99735	MGST2_HUMAN	MGST2	Microsomal glutathione S-transferase 2		24.7234	24.7995	24.7441	24.5983	24.6649	24.7441	0.0865332	0.839071
P20073	ANXA7_HUMAN	ANXA7	Annexin A7		27.1214	27.1795	27.1507	27.0813	27.0296	27.0813	0.0864652	1.64088
Q8NHQ8	RASF8_HUMAN	RASSF8	Ras association domain-containing protein 8		21.9024	21.953	21.8614	21.7471	21.8913	21.8191	0.0864175	0.810123
Q9UBV2	SE1L1_HUMAN	SEL1L	Protein sel-1 homolog 1		25.019	25.1642	25.1833	24.9088	25.1253	25.0732	0.0863991	0.445603
P48739	PIPNB_HUMAN	PITPNB	Phosphatidylinositol transfer protein beta isoform		26.3975	26.4105	26.3239	26.3101	26.2372	26.3256	0.0863711	1.05822
Q9HBM1	SPC25_HUMAN	SPC25	Kinetochore protein Spc25		24.3307	23.8093	23.6971	24.2961	23.7182	23.5638	0.086338	0.105003
Q8IVB5	LIX1L_HUMAN	LIX1L	LIX1-like protein		22.895	22.6497	22.6736	22.654	22.6736	22.632	0.0862192	0.472872
Q13884	SNTB1_HUMAN	SNTB1	Beta-1-syntrophin		22.1269	22.239	22.0559	22.0224	22.1457	21.9951	0.0862077	0.538788
Q9H5Q4	TFB2M_HUMAN	TFB2M	Dimethyladenosine transferase 2, mitochondrial		23.3376	23.2535	23.2036	23.3511	23.0071	23.178	0.0861549	0.332758
Q92692	NECT2_HUMAN	NECTIN2	Nectin-2		24.6431	24.7594	24.7286	24.5105	24.6757	24.6865	0.086113	0.574361
A6NNP5	CC169_HUMAN	CCDC169	Coiled-coil domain-containing protein 169		19.6812	19.4439	19.5875	19.6809	19.6296	19.1437	0.0861098	0.177165
P28074	PSB5_HUMAN	PSMB5	Proteasome subunit beta type-5		27.8264	27.8445	27.8264	27.673	27.8019	27.7645	0.0859343	1.04163
Q96BW9	TAM41_HUMAN	TAMM41	Phosphatidate cytidylyltransferase, mitochondrial		22.0789	21.9098	21.8614	21.7056	22.1111	21.7756	0.085933	0.239334
Q16656	NRF1_HUMAN	NRF1	Nuclear respiratory factor 1		22.6907	22.7634	22.7756	22.7935	22.4751	22.7035	0.085893	0.364486
Q12982	BNIP2_HUMAN	BNIP2	BCL2/adenovirus E1B 19 kDa protein-interacting protein 2		23.1253	23.0674	22.9725	23.0342	22.8191	23.0542	0.0858905	0.418244
Q08945	SSRP1_HUMAN	SSRP1	FACT complex subunit SSRP1		26.3894	26.2499	26.1984	26.3393	26.1095	26.1312	0.0858707	0.390049
O60291	MGRN1_HUMAN	MGRN1	E3 ubiquitin-protein ligase MGRN1		24.217	24.2021	24.1095	24.0526	24.1253	24.0935	0.0857245	1.01409
Q9UI10	EI2BD_HUMAN	EIF2B4	Translation initiation factor eIF2B subunit delta		24.0854	24.1253	24.1015	24.0359	23.9672	24.0526	0.085509	1.39447
P13807	GYS1_HUMAN	GYS1	Glycogen [starch] synthase, muscle		25.1135	25.2133	25.2996	25.0732	25.1135	25.1833	0.0854842	0.612078
Q96Q45	TM237_HUMAN	TMEM237	Transmembrane protein 237		22.8288	23.3101	22.6186	22.9933	22.9441	22.5638	0.0853996	0.127528
Q9BVC6	TM109_HUMAN	TMEM109	Voltage-gated monoatomic cation channel TMEM109		27.6527	27.7771	27.7771	27.632	27.6389	27.6798	0.0853634	0.903989
Q9H490	PIGU_HUMAN	PIGU	Phosphatidylinositol glycan anchor biosynthesis class U protein		22.848	22.7935	22.7756	22.8191	22.5685	22.7735	0.0853341	0.459996
P20340	RAB6A_HUMAN	RAB6A	Ras-related protein Rab-6A		26.5165	26.7129	26.7517	26.4738	26.5255	26.726	0.0852915	0.331875
Q9Y5Z7	HCFC2_HUMAN	HCFC2	Host cell factor 2		21.1395	21.1704	21.2185	21.1581	20.9024	21.2125	0.0850811	0.360861
Q7L7X3	TAOK1_HUMAN	TAOK1	Serine/threonine-protein kinase TAO1		23.9225	23.9043	23.9043	23.7895	23.848	23.8385	0.0849972	1.94828
P53609	PGTB1_HUMAN	PGGT1B	Geranylgeranyl transferase type-1 subunit beta		22.654	22.6209	22.6757	22.3778	22.6886	22.6298	0.0848096	0.366825
A0A087WZ39	A0A087WZ39_HUMAN	TRBV15	T cell receptor beta variable 15 (Fragment)		18.9914	19.2104	19.1387	18.8369	19.1368	19.1125	0.0848014	0.297219
P52907	CAZA1_HUMAN	CAPZA1	F-actin-capping protein subunit alpha-1		27.9428	27.9869	27.9814	27.8682	27.8682	27.9203	0.0847994	1.72558
Q9NW64	RBM22_HUMAN	RBM22	Pre-mRNA-splicing factor RBM22		23.8288	23.8576	23.8764	23.7796	23.7695	23.7594	0.0847797	2.31416
Q8NFZ5	TNIP2_HUMAN	TNIP2	TNFAIP3-interacting protein 2		18.7467	19.2204	19.0846	19.1041	18.6878	19.0061	0.0845509	0.169154
Q9H9Y4	GPN2_HUMAN	GPN2	GPN-loop GTPase 2		21.9061	22.0292	21.7634	21.8346	21.7876	21.823	0.0845229	0.468674
Q9BVI4	NOC4L_HUMAN	NOC4L	Nucleolar complex protein 4 homolog		24.4614	24.1642	24.2021	24.3239	24.1015	24.1488	0.0845114	0.297362
P33993	MCM7_HUMAN	MCM7	DNA replication licensing factor MCM7		25.9869	25.4738	25.3844	25.989	25.3066	25.2961	0.084446	0.102499
Q96CP2	FWCH2_HUMAN	FLYWCH2	FLYWCH family member 2		24.9672	25.1795	25.1681	24.9628	25.1449	24.9539	0.0843697	0.381896
Q9Y5P4	CERT_HUMAN	CERT1	Ceramide transfer protein		23.8093	23.8288	23.7995	23.7695	23.6865	23.7286	0.0843455	1.52801
Q8TER5	ARH40_HUMAN	ARHGEF40	Rho guanine nucleotide exchange factor 40		23.4425	23.5754	23.6096	23.3778	23.4923	23.5045	0.084343	0.578095
P56181	NDUV3_HUMAN	NDUFV3	NADH dehydrogenase [ubiquinone] flavoprotein 3, mitochondrial		22.9777	23.0071	22.7098	22.821	22.7348	22.8858	0.0843283	0.333694
Q96S82	UBL7_HUMAN	UBL7	Ubiquitin-like protein 7		23.632	23.632	23.8385	23.7389	23.4676	23.6431	0.0842889	0.330228
Q99501	GA2L1_HUMAN	GAS2L1	GAS2-like protein 1		22.8614	22.5915	22.3645	22.7816	22.7675	22.0156	0.0842292	0.104269
O94927	HAUS5_HUMAN	HAUS5	HAUS augmin-like complex subunit 5		23.1871	22.976	23.002	23.1206	22.8839	22.9079	0.0841853	0.347933
Q9HB58	SP110_HUMAN	SP110	Sp110 nuclear body protein		21.9207	21.9812	21.9171	21.9601	21.823	21.7836	0.0840937	0.663864
Q5TCZ1	SPD2A_HUMAN	SH3PXD2A	SH3 and PX domain-containing protein 2A		20.9171	20.9459	20.9024	20.9243	20.7389	20.85	0.0840664	0.691355
P51946	CCNH_HUMAN	CCNH	Cyclin-H		23.1063	23.0054	22.8034	22.9968	22.7935	22.8727	0.0840333	0.322598
Q13164	MK07_HUMAN	MAPK7	Mitogen-activated protein kinase 7		22.0886	22.019	22.0821	21.8764	22.1047	21.9566	0.0840168	0.524428
Q9UIV1	CNOT7_HUMAN	CNOT7	CCR4-NOT transcription complex subunit 7		23.654	23.6209	23.654	23.632	23.5165	23.5285	0.0839647	1.02967
Q9UL46	PSME2_HUMAN	PSME2	Proteasome activator complex subunit 2		26.9428	27.0914	27.019	26.8623	27.019	26.9203	0.0838922	0.598465
Q9H5X1	CIA2A_HUMAN	CIAO2A	Cytosolic iron-sulfur assembly component 2A		23.0426	22.8404	22.9043	22.7634	22.9707	22.8014	0.0838839	0.407823
P11166	GTR1_HUMAN	SLC2A1	Solute carrier family 2, facilitated glucose transporter member 1		29.1189	29.0839	29.104	28.877	28.9567	29.2216	0.0838203	0.32975
Q6ICL3	TNG2_HUMAN	TANGO2	Transport and Golgi organization protein 2 homolog		20.6186	20.5823	20.714	20.3211	20.6971	20.6453	0.0838127	0.270664
Q14643	ITPR1_HUMAN	ITPR1	Inositol 1,4,5-trisphosphate-gated calcium channel ITPR1		23.1269	23.3376	23.3239	23.0054	23.3239	23.2081	0.0836747	0.293969
Q92839	HYAS1_HUMAN	HAS1	Hyaluronan synthase 1		27.6998	27.5969	27.5969	27.509	27.6865	27.4473	0.0836137	0.453362
Q6UW56	ARAID_HUMAN	ATRAID	All-trans retinoic acid-induced differentiation factor		23.2021	23.632	23.4676	23.2821	23.3778	23.391	0.0836112	0.255913
O75448	MED24_HUMAN	MED24	Mediator of RNA polymerase II transcription subunit 24		22.867	22.7451	22.7286	22.7735	22.68	22.6364	0.0835641	0.63273
Q13641	TPBG_HUMAN	TPBG	Trophoblast glycoprotein		22.9795	23.3239	23.2346	22.9261	23.2346	23.1269	0.0834262	0.239616
P52565	GDIR1_HUMAN	ARHGDIA	Rho GDP-dissociation inhibitor 1		29.7437	29.7453	29.8829	29.6058	29.7096	29.8065	0.0833308	0.490092
O00743	PPP6_HUMAN	PPP6C	Serine/threonine-protein phosphatase 6 catalytic subunit		26.3187	26.4346	25.7389	25.7895	26.3083	26.1449	0.0831451	0.114269
P42166	LAP2A_HUMAN	TMPO	Lamina-associated polypeptide 2, isoform alpha		27.1507	27.0813	26.9977	27.189	26.965	26.8264	0.0831254	0.294024
Q13257	MD2L1_HUMAN	MAD2L1	Mitotic spindle assembly checkpoint protein MAD2A		25.3712	24.7129	24.6486	25.3101	24.6153	24.558	0.0831089	0.0883661
O14972	VP26C_HUMAN	VPS26C	Vacuolar protein sorting-associated protein 26C		24.2961	24.2821	24.317	24.1174	24.2607	24.2679	0.0830752	0.764107
Q9H5H4	ZN768_HUMAN	ZNF768	Zinc finger protein 768		21.3699	21.1015	21.0426	21.1457	20.9672	21.1519	0.0830574	0.285062
P62263	RS14_HUMAN	RPS14	Small ribosomal subunit protein uS11		29.588	29.6697	29.6005	29.5315	29.5555	29.5222	0.0830072	1.41737
Q9H501	ESF1_HUMAN	ESF1	ESF1 homolog		22.6865	22.7182	22.5498	22.8113	22.3376	22.5568	0.0829182	0.221015
Q86Y39	NDUAB_HUMAN	NDUFA11	NADH dehydrogenase [ubiquinone] 1 alpha subcomplex subunit 11		25.217	25.3239	25.275	25.2058	25.2679	25.0935	0.0828985	0.625163
O43924	PDE6D_HUMAN	PDE6D	Retinal rod rhodopsin-sensitive cGMP 3',5'-cyclic phosphodiesterase subunit delta		23.5522	23.4551	23.5045	23.391	23.4551	23.417	0.0828718	1.15859
Q6NXT6	TAPT1_HUMAN	TAPT1	Transmembrane anterior posterior transformation protein 1 homolog		22.4849	22.6231	22.4726	22.632	22.4324	22.2679	0.0827955	0.288889
Q86WB0	ZC3C1_HUMAN	ZC3HC1	Zinc finger C3HC-type protein 1		23.654	23.6971	23.7695	23.5983	23.6757	23.5983	0.082756	0.910293
P39748	FEN1_HUMAN	FEN1	Flap endonuclease 1		26.4629	26.2317	26.141	26.4008	26.0752	26.1115	0.0827255	0.230495
P07686	HEXB_HUMAN	HEXB	Beta-hexosaminidase subunit beta		26.9088	27.2077	27.0914	26.8385	27.0813	27.0401	0.0827045	0.291283
Q7L4S7	ARMX6_HUMAN	ARMCX6	Protein ARMCX6		21.2125	21.5165	21.4476	21.2243	21.4221	21.2821	0.082695	0.309003
P09038	FGF2_HUMAN	FGF2	Fibroblast growth factor 2		25.0772	24.9225	25.0105	24.9316	24.6703	25.1604	0.0826658	0.216524
P62316	SMD2_HUMAN	SNRPD2	Small nuclear ribonucleoprotein Sm D2		27.6458	27.6663	27.6389	27.604	27.5165	27.5826	0.0826251	1.39693
Q9Y2R2	PTN22_HUMAN	PTPN22	Tyrosine-protein phosphatase non-receptor type 22		17.5903	18.9112	17.6862	17.7017	18.3267	17.9118	0.0825106	0.0618469
P19256	LFA3_HUMAN	CD58	Lymphocyte function-associated antigen 3		24.8336	24.9847	24.9803	24.604	24.9495	24.9977	0.082503	0.244016
Q96DU7	IP3KC_HUMAN	ITPKC	Inositol-trisphosphate 3-kinase C		20.002	20.1079	20.0426	19.8571	19.9149	20.1332	0.0824076	0.387716
Q9UIG0	BAZ1B_HUMAN	BAZ1B	Tyrosine-protein kinase BAZ1B		24.7695	24.5926	24.5926	24.7234	24.48	24.5045	0.0823116	0.351527
P00390	GSHR_HUMAN	GSR	Glutathione reductase, mitochondrial		27.3494	27.4234	27.2979	27.217	27.3992	27.2077	0.0822989	0.497605
O95149	SPN1_HUMAN	SNUPN	Snurportin-1		22.9864	22.8595	22.7389	22.8595	22.7119	22.7675	0.0819906	0.41876
P02686	MBP_HUMAN	MBP	Myelin basic protein		20.4576	20.3101	20.5545	20.3538	20.4576	20.265	0.0819283	0.381502
Q14533	KRT81_HUMAN	KRT81	Keratin, type II cuticular Hb1		21.9672	21.7675	22.1734	21.714	21.9637	21.9847	0.0819219	0.218629
P61225	RAP2B_HUMAN	RAP2B	Ras-related protein Rap-2b		24.217	24.2679	24.3307	24.0359	24.3101	24.2243	0.0817426	0.395092
Q96NT0	CC115_HUMAN	CCDC115	Coiled-coil domain-containing protein 115		23.0476	22.8708	23.0625	22.9171	22.8913	22.928	0.0815099	0.581229
Q8NDT2	RB15B_HUMAN	RBM15B	Putative RNA-binding protein 15B		25.9088	25.9225	25.8552	25.7492	25.8694	25.824	0.081344	0.936394
Q6UUV7	CRTC3_HUMAN	CRTC3	CREB-regulated transcription coactivator 3		20.8727	20.8423	21.0224	20.895	20.9098	20.6886	0.0813338	0.376968
O95716	RAB3D_HUMAN	RAB3D	Ras-related protein Rab-3D		26.8385	26.5492	26.5754	26.673	26.5478	26.4984	0.0813109	0.313611
P23025	XPA_HUMAN	XPA	DNA repair protein complementing XP-A cells		20.8269	20.6886	20.85	20.7796	20.5545	20.7876	0.0812651	0.371935
P10606	COX5B_HUMAN	COX5B	Cytochrome c oxidase subunit 5B, mitochondrial		25.8788	26.0317	26.1293	26.0084	25.9043	25.8834	0.0812225	0.41945
Q5VUA4	ZN318_HUMAN	ZNF318	Zinc finger protein 318		22.6562	22.68	22.6886	22.5938	22.6029	22.5846	0.0811914	2.7424
P48382	RFX5_HUMAN	RFX5	DNA-binding protein RFX5		21.6757	21.6843	21.632	21.5451	21.6584	21.5451	0.0811507	0.922608
P60983	GMFB_HUMAN	GMFB	Glia maturation factor beta		26.2571	26.3273	26.3222	26.1738	26.2874	26.2021	0.0811125	0.925958
Q68BL7	OLM2A_HUMAN	OLFML2A	Olfactomedin-like protein 2A		20.9316	21.3376	21.2066	20.6628	21.2877	21.2821	0.0810579	0.123803
Q9Y3E7	CHMP3_HUMAN	CHMP3	Charged multivesicular body protein 3		24.5926	24.5522	24.5926	24.5045	24.5165	24.4738	0.080869	1.9195
A6NDU8	RIMC1_HUMAN	RIMOC1	RAB7A-interacting MON1-CCZ1 complex subunit 1		23.8576	23.7995	23.9406	23.848	23.7077	23.7995	0.0808029	0.626441
Q86X76	NIT1_HUMAN	NIT1	Deaminated glutathione amidase		24.5345	24.7441	24.7024	24.4862	24.6209	24.632	0.0806274	0.435085
O75694	NU155_HUMAN	NUP155	Nuclear pore complex protein Nup155		25.0275	25.0359	24.9716	24.9628	24.8858	24.945	0.0804666	1.22659
O43739	CYH3_HUMAN	CYTH3	Cytohesin-3		22.7915	22.7492	22.8442	22.7286	22.6497	22.7655	0.0804132	0.852128
Q8NFW8	NEUA_HUMAN	CMAS	N-acylneuraminate cytidylyltransferase		24.1642	24.4234	24.4105	24.1095	24.3031	24.3444	0.0804087	0.292893
Q96QZ7	MAGI1_HUMAN	MAGI1	Membrane-associated guanylate kinase, WW and PDZ domain-containing protein 1		21.7836	22.002	22.9477	22.0951	22.48	21.9171	0.0803642	0.0714349
Q9BXC9	BBS2_HUMAN	BBS2	Bardet-Biedl syndrome 2 protein		22.9601	22.9584	23.0122	22.7935	23.0443	22.8519	0.0803591	0.443773
Q14689	DIP2A_HUMAN	DIP2A	Disco-interacting protein 2 homolog A		25.317	25.5783	25.6513	25.3477	25.3342	25.6237	0.0803534	0.226925
Q96AA3	RFT1_HUMAN	RFT1	Man(5)GlcNAc(2)-PP-dolichol translocation protein RFT1		23.7895	23.6865	23.8093	23.7695	23.654	23.6209	0.0803013	0.610685
O94903	PLPHP_HUMAN	PLPBP	Pyridoxal phosphate homeostasis protein		25.5926	25.6865	25.6264	25.5522	25.5345	25.5783	0.0802085	1.24508
Q8NAV1	PR38A_HUMAN	PRPF38A	Pre-mRNA-splicing factor 38A		24.217	24.1642	24.2021	24.0772	24.1015	24.1642	0.0801093	1.24145
Q9H3H1	MOD5_HUMAN	TRIT1	tRNA dimethylallyltransferase		23.1519	22.8132	23.0071	23.019	22.8651	22.848	0.080005	0.288127
Q9BV44	THUM3_HUMAN	THUMPD3	tRNA (guanine(6)-N2)-methyltransferase THUMP3		23.8093	23.6971	23.7182	23.7995	23.5869	23.5983	0.0799567	0.445512
P49321	NASP_HUMAN	NASP	Nuclear autoantigenic sperm protein		27.6181	27.4785	27.391	27.509	27.3153	27.4234	0.0799465	0.388735
Q8IV08	PLD3_HUMAN	PLD3	5'-3' exonuclease PLD3		24.9933	25.4862	25.4425	24.8044	25.4041	25.4738	0.0799173	0.109251
Q9H410	DSN1_HUMAN	DSN1	Kinetochore-associated protein DSN1 homolog		21.5869	21.7013	21.5309	21.6409	21.2933	21.6453	0.079895	0.249357
Q9ULJ7	ANR50_HUMAN	ANKRD50	Ankyrin repeat domain-containing protein 50		23.417	23.3239	23.3778	23.3778	23.2051	23.2961	0.0798861	0.63488
Q9NVX7	KBTB4_HUMAN	KBTBD4	Kelch repeat and BTB domain-containing protein 4		22.0658	22.0951	22.2361	21.9672	22.1612	22.0292	0.0798041	0.440889
Q5T4I8	CF052_HUMAN	C6orf52	Putative uncharacterized protein C6orf52		19.5198	19.5971	19.5949	19.553	19.3419	19.5779	0.0796884	0.43117
Q96M27	PRRC1_HUMAN	PRRC1	Protein PRRC1		25.8741	25.9517	26.0041	25.7234	25.9428	25.9248	0.0796439	0.426088
Q7L2J0	MEPCE_HUMAN	MEPCE	7SK snRNA methylphosphate capping enzyme		23.6431	23.5638	23.5285	23.5869	23.4676	23.4425	0.0794442	0.640745
Q969F9	HPS3_HUMAN	HPS3	BLOC-2 complex member HPS3		25.3975	25.4425	25.2926	25.2785	25.341	25.275	0.079415	0.738607
A8MWD9	RUXGL_HUMAN	SNRPGP15	Putative small nuclear ribonucleoprotein G-like protein 15		27.8564	27.8504	27.8741	27.8324	27.8445	27.6663	0.0792408	0.61409
Q9H974	QTRT2_HUMAN	QTRT2	Queuine tRNA-ribosyltransferase accessory subunit 2		23.2821	23.214	23.1991	23.1581	23.2535	23.0459	0.0792236	0.535963
Q8TB37	NUBPL_HUMAN	NUBPL	Iron-sulfur cluster transfer protein NUBPL		22.0592	22.3645	22.1426	21.9098	22.1426	22.2764	0.0791899	0.219379
Q969G3	SMCE1_HUMAN	SMARCE1	SWI/SNF-related matrix-associated actin-dependent regulator of chromatin subfamily E member 1		26.1719	26.0732	26.0567	26.1391	26.0212	25.9043	0.0790965	0.442642
[truncated: 6,274 more rows]

## Sheet: Log2FC -Log10Pvalue for Volcano
Genes	Log2FC	LOG10 p-VALUE
CXCL8	7.4046	3.09375
DUSP1	6.08792	3.61261
CXCL3	4.69489	2.11622
FAM204A	4.67239	0.913987
IER3	4.45014	2.83772
ATF3	4.43684	4.06338
NFKBIZ	4.4075	2.07107
CCL2	4.36022	2.43415
GADD45A	4.22093	2.63509
COX8C	4.15604	0.954822
HBEGF	4.08091	2.43247
ITM2C	4.03149	2.99821
UBB;UBC	3.85937	2.18395
CXCL1	3.80454	3.19854
KLHL17	3.7727	3.24743
HPS6	3.75479	0.951182
FAM229B	3.7319	1.08551
NR1D2	3.59079	2.44758
IL6	3.58128	2.6466
GABARAP	3.57355	4.16439
EPC1	3.48067	3.12183
EGR1	3.33149	3.17004
PCTP	3.21303	0.8932
LIF	3.21133	5.07493
ZNF138	3.18304	0.832024
B4GALNT1	3.17966	1.07216
IRF1	3.17059	2.56266
NEDD9	3.14181	2.52444
GEM	3.09319	1.57549
ZFP36	3.07346	2.30034
TPST1	2.98739	0.802504
COQ8A	2.9256	0.935935
FOS	2.85529	1.80901
FBXO32	2.80238	3.13689
TARBP2	2.79206	0.886444
HMGCR	2.7594	1.91078
UNQ6494/PRO21346	2.74676	2.68656
UTY	2.74031	0.483408
TNFAIP3	2.73339	2.3982
CEBPD	2.73104	2.81023
SMIM32	2.72292	0.589143
MAF1	2.69493	0.943358
WDR17	2.69404	1.32081
DNAJC12	2.67083	1.51483
CNGA3	2.61847	0.584055
CREB3L2	2.589	1.02185
SIPA1	2.51343	0.894148
GUSBP11	2.51155	0.836834
NUAK2	2.49981	2.4983
OTUD5	2.4792	0.592906
BHLHE40	2.45884	3.87551
IGLL5	2.45844	0.975179
CCDC166	2.38943	1.48398
KLF6	2.33893	2.41406
PRELID3B	2.29973	0.372307
PMS2P1	2.25028	2.39385
ZKSCAN8	2.22512	1.1963
IL1B	2.19362	3.77357
AP5M1	2.18062	1.57597
TAPBPL	2.17078	0.555767
ADORA2B	2.16204	0.658237
OR4D2	2.15698	0.938121
LIN52	2.13491	1.09993
UNG	2.10856	0.477506
HJURP	2.08422	0.4382
ALDH5A1	2.06523	0.416766
INAFM2	2.04798	0.858026
DDIT4	2.04665	2.5486
RNF169	2.04148	0.421679
ACTMAP	2.03632	0.999536
INHBA	2.03279	3.11267
CYP4Z1	2.03111	0.629777
COL2A1	2.03013	4.72736
CSDC2	2.02432	2.13147
USP42	2.02187	0.491537
TRAJ25	2.00695	2.20095
NEK4	1.97154	0.349735
SLC34A3	1.95817	1.40689
TAF10	1.91324	0.893609
KSR1	1.8977	0.487679
NDUFAF6	1.87006	0.568463
FOSB	1.86938	2.02764
SAA1	1.83725	0.702512
GPR108	1.83529	2.77408
PTGS2	1.83004	1.42887
KLF10	1.81062	1.7384
PAPOLG	1.80326	0.393914
TMEM39A	1.79818	1.74799
ZNF429	1.79704	1.91909
GKAP1	1.79523	0.952659
PMAIP1	1.79488	1.27118
RND3	1.79057	4.06302
CITED2	1.78906	2.53596
JUNB	1.77369	2.2086
GPR156	1.76797	0.755809
MRAS	1.74999	0.445818
KRTAP3-3	1.74308	0.424539
SH2B3	1.74263	0.318503
DUXA	1.73973	3.21379
LY6G5B	1.73557	0.313859
MTMR8	1.72908	0.340974
FOXO1	1.691	0.696553
MENT	1.66769	0.780547
ZFYVE26	1.66199	0.388912
HINT3	1.64718	0.511337
GINM1	1.63966	1.63926
ANKRD1	1.62645	2.25413
ZFP36L1	1.57331	3.74518
TMEM167B	1.55613	0.450278
FAAP24	1.55532	0.856788
CCN2	1.54894	3.42143
THAP12	1.53861	0.509348
PTK2B	1.53799	0.535839
PSTPIP2	1.52733	0.787053
CD164L2	1.50978	1.86427
OR1L3	1.49965	0.633539
APOE	1.49945	3.22664
LOC122539214	1.49763	0.535786
ZMYM1	1.48926	0.450859
KIF1A	1.48737	0.594343
ITIH4	1.48394	1.086
RAD51	1.4778	0.588783
ARRDC3	1.47098	3.89743
FAM241A	1.47093	0.849995
SNX24	1.46234	0.97622
DENND1C	1.46108	0.497415
ZRANB3	1.45259	0.477167
C5orf46	1.44122	0.41796
TKTL1	1.42681	0.454288
ATXN1L	1.42499	1.16595
PPP1R3G	1.42359	0.670522
PPM1K	1.41014	0.337525
GNAZ	1.39605	0.404238
ARL14EPL	1.39181	0.456074
SLC26A6	1.3855	0.513404
MSANTD2	1.38004	0.480599
AADAC	1.37056	0.362472
ASB2	1.36693	0.915282
MRPS16	1.36634	0.509305
QRSL1	1.363	0.835034
PTX3	1.3566	3.56462
PLEKHB2	1.3496	1.31239
GRIA1	1.34532	0.31811
RGS4	1.3447	1.50582
PLEKHA8	1.34465	1.18207
PAX6	1.34067	0.79585
LMOD2	1.33147	0.723629
RNF139	1.32454	0.455755
CNOT3	1.31474	0.946939
SHISA4	1.30582	0.374087
MAFF	1.30519	2.23712
TENM4	1.30463	0.372178
CLTCL1	1.29861	0.824604
RNF152	1.29513	1.53417
IER2	1.29403	1.48198
SLC35B3	1.28241	0.356021
ZBTB38	1.27952	1.39016
SPRY2	1.27234	0.945292
P2RY11	1.27129	0.281303
DUS1L	1.26677	0.290844
TP53INP2	1.26559	0.64287
ZSCAN32	1.25637	0.665996
MYORG	1.25373	0.675127
GTPBP8	1.24949	0.6712
APOA1	1.24518	1.61949
TMEM59	1.24508	3.38578
TM2D1	1.2446	0.388601
KLHL6	1.24232	0.445535
VEGFA	1.24106	0.630715
GIG44	1.24091	1.90437
NDUFAF5	1.23975	0.356041
PLAAT3	1.23911	1.18664
AUH	1.23572	1.52624
PNLIP	1.23096	1.38508
PDZRN3	1.22784	0.496374
SCML1	1.2264	1.30465
MCL1	1.22636	3.06306
ZNF182	1.21899	0.516904
MTIF3	1.21894	0.688792
UCKL1	1.21717	2.22906
TEX26	1.2143	0.732401
WASF1	1.19908	0.627259
BRF1	1.17597	0.692735
IL10RB	1.17409	0.645226
NOCT	1.17163	3.02753
ATP11C	1.16965	0.911367
APOC3	1.15978	1.25912
PRR5L	1.1542	0.49781
DIPK2B	1.15062	0.943313
MED31	1.14485	0.314424
LINC00596	1.14071	0.935392
HBA2	1.13528	1.11502
SIK1B	1.13242	2.97027
RACGAP1	1.13047	0.352653
AGBL3	1.12935	0.25096
USP26	1.11885	0.286552
LINC02876	1.11849	0.556721
NRBP1	1.11306	2.12556
RAVER2	1.11174	0.724898
SELENOI	1.1107	0.776351
FOXD4	1.09714	0.976408
USP6NL	1.09547	0.223215
CCN1	1.08852	2.77849
SLC8A1	1.0821	0.36938
GID8	1.08056	2.97491
CD300LD-AS1	1.07839	1.23547
UVSSA	1.07723	0.242219
NABP1	1.07598	1.02877
TIGD4	1.07221	0.982288
MAP3K20	1.07077	0.29056
ARHGAP39	1.06839	0.168244
PFN4	1.06444	0.283529
RNF167	1.0565	0.34519
HGFAC	1.05453	1.80942
RNF145	1.05438	0.882176
DELEC1	1.05302	1.00409
OR4E2	1.05197	0.241021
ETS1	1.0509	3.63806
PPP2R5B	1.04969	0.321066
LYRM1	1.04537	0.399186
IRAK2	1.04364	0.404944
LCA5	1.04063	0.278457
APOB	1.03045	1.30794
PYGO1	1.02089	1.59033
KDM8	1.01838	0.753298
HPX	1.01469	2.91008
KLHL12	1.0145	0.432775
NLRP10	1.01329	0.283574
FAM106A;FAM106C	1.01273	0.537663
IPPK	1.00904	0.316516
AREL1	1.00548	0.776427
TRIM17	0.978019	0.44067
JUN	0.97524	2.02614
MT1L	0.96769	1.97141
PPP1R13B	0.964447	0.171689
CEBPZOS	0.957705	0.435077
F8A3	0.953282	0.937314
ZNF295-AS1	0.945871	1.81954
COL3A1	0.9426	2.4524
GRIN2C	0.94239	0.832803
TXNL4B	0.941673	0.376629
RIPPLY2	0.940591	0.567268
MARF1	0.937384	0.527409
WBP1L	0.931548	4.16956
CDC42EP2	0.929495	1.0659
TMEM14C	0.927458	1.84305
CEP57	0.926296	0.186598
ITM2B	0.925646	2.29395
NR2C1	0.920413	0.941472
CEMIP	0.917165	0.834059
PAG1	0.915197	0.818007
ZNF180	0.912984	0.982312
CINP	0.910697	0.424277
MIF4GD	0.910631	0.465613
TGIF1	0.909171	1.98692
NDFIP1	0.907642	0.519684
FZR1	0.903942	0.670181
NIPA2	0.903227	0.664352
STRBP	0.895245	0.10661
AURKB	0.895207	0.264451
CCDC71	0.89314	0.615417
TIMP2	0.882761	3.29372
CDK19	0.869748	0.603858
ZNF446	0.863556	0.586291
WDR76	0.861707	0.266721
VOPP1	0.855452	2.72652
RREB1	0.854776	0.742705
LRRC25	0.854591	2.68765
ZNF470	0.851027	0.312927
CDKN1A	0.850506	2.61924
HERPUD1	0.850452	4.25543
ZFYVE28	0.850203	0.727563
MARCHF7	0.850178	1.24885
CMTM4	0.848843	0.346328
PXMP4	0.848588	0.915098
OR2M3	0.846212	0.791435
COX7B2	0.844571	0.532276
BMPR1A	0.84373	0.512629
EPS15L1	0.842402	0.586484
CLSTN3	0.839314	1.75428
AMOTL2	0.833206	3.39836
ABL2	0.832137	4.64913
APOM	0.811872	1.02601
FGB	0.810532	1.85659
NCOA4	0.809233	2.27296
SPINT2	0.807624	0.671065
COL1A2	0.806854	2.5532
KANSL2	0.805516	0.756096
THNSL1	0.804337	0.63154
TRMT112	0.800645	2.71314
GRM5	0.797578	0.848054
NFIL3	0.797056	0.229524
HOXD4	0.794889	0.488135
SLC43A2	0.794437	2.44007
APLP2	0.792395	3.94459
TMEM267	0.791492	1.15895
IFT20	0.791462	1.67328
BCAS2	0.791234	0.478952
F2	0.789732	1.94015
ZCCHC18	0.789588	0.6017
HBB	0.786343	1.42642
IGKV1-8	0.785896	0.391184
ANGPT4	0.77877	1.28186
TEX19	0.775356	1.86322
LRRN4	0.774955	0.94662
SEMA3D	0.774713	0.669685
MSANTD3	0.770203	1.75965
MUC13	0.769356	2.43347
NDFIP2	0.76451	2.21794
PFDN5	0.763255	1.93619
SRGN	0.761851	2.78124
FGF20	0.755213	0.371207
TAOK3	0.754603	0.85608
POF1B	0.752008	0.958281
MEA1	0.750135	0.357394
KDM2B	0.749044	0.10882
DYNLL2	0.746506	2.37582
CEP76	0.745557	0.224189
RASSF10	0.744892	0.537974
SYTL4	0.744665	0.338417
ZNF479	0.743851	0.693487
B4GALT4	0.739223	0.530488
COLGALT2	0.738773	0.337154
POP4	0.737308	0.677801
MYO3B	0.736565	0.121818
DNER	0.731702	2.49209
MORF4L1	0.730239	0.687922
ADAMTS1	0.729968	1.4058
NBR1	0.722147	2.56279
SLC37A4	0.716893	0.468404
SESN2	0.71456	1.36014
HMGCS1	0.714537	1.01327
TRIM41	0.710294	0.436636
CCNT1	0.706369	0.425786
HRH2	0.705634	0.470971
SEMA4C	0.704312	0.519515
ZNF518B	0.703956	0.181915
CRYL1	0.701148	0.099398
FBXO40	0.699294	0.479141
CCSER1	0.696356	0.51874
PLAT	0.693926	0.848426
C1orf159	0.684652	0.51724
MRPL12	0.680833	3.54706
HPS4	0.679307	0.269883
FOSL2	0.677931	3.92857
COMMD8	0.674287	1.77157
JMJD4	0.673064	0.459682
PRR12	0.667339	1.02964
LCT	0.665668	0.551576
TMEM71	0.664081	0.805967
MTRF1L	0.662747	0.346931
SYT11	0.662272	1.87454
ID3	0.661006	1.60582
SH3BP5	0.660812	0.445894
LYSMD3	0.658649	0.496891
CRTC2	0.65732	0.372437
COL4A4	0.656291	0.525528
IFRD1	0.651849	1.87456
LGR4	0.650244	1.0313
DPP8	0.65005	0.253731
INHBC	0.647182	0.451212
FGG	0.64691	1.70915
EIF4EBP1	0.645208	1.96927
TNFRSF12A	0.644931	3.81591
GBP2	0.644834	0.31558
KRTAP10-6;KRTAP10-7	0.642585	0.588295
HNRNPCL1	0.642078	0.362144
CEBPB	0.641408	3.06003
APP	0.641404	3.35354
CTNNBIP1	0.640858	0.67529
LARS1	0.638313	0.683405
POSTN	0.638009	1.05793
FBXL17	0.634827	1.10878
PDP2	0.632753	0.252667
IBA57	0.629833	0.329038
PASK	0.627675	1.06397
CALCOCO1	0.627318	3.33576
SPOCK1	0.622843	1.86551
VTN	0.622357	1.40831
ZC3H12A	0.619536	1.81863
FGD1	0.613923	0.550336
WASHC2C	0.613173	0.620626
ABHD16B	0.612869	0.127505
SPINT4	0.612454	0.563186
F13A1	0.60756	1.24917
ANKRD26P1	0.606023	0.621145
RAD54L	0.604424	0.625254
PINK1	0.59853	0.306654
CEP350	0.596881	0.242956
POLI	0.59675	0.156304
SPRED2	0.596675	0.755866
MED22	0.59357	0.566692
DUSP6	0.592967	1.03227
ZNF8	0.584334	1.32847
PNPLA2	0.579774	2.60494
ZNF217	0.576768	1.74998
CHMP4C	0.576052	0.982817
PI4K2A	0.57573	0.458642
CBX6	0.573609	0.625739
RFXANK	0.571004	0.663023
RNF149	0.568602	1.56024
SIAH2	0.565706	0.45832
RPL39	0.563263	4.08727
ORC5	0.56319	0.815889
PNMA5	0.560213	1.23662
DCTN3	0.559566	3.20516
CLU	0.55945	1.10646
ZDBF2	0.558023	0.187444
DNAJB9	0.554237	1.11467
CRIM1	0.55381	2.02423
APOBEC3C	0.55369	0.478249
MARCHF2	0.552694	0.444714
MSX2	0.552422	0.380883
GPRASP2	0.552106	0.972525
SLC20A1	0.551172	2.33704
ARID5B	0.549557	2.7359
CDKN2B	0.548278	0.608267
APOD	0.547373	0.797998
FANCD2	0.546291	0.18026
TRBC2	0.54436	0.632713
TRIM54	0.5438	0.174837
PRMT2	0.543741	0.264559
PNMA1	0.543321	0.287868
KLHL21	0.541999	1.16968
POLG2	0.541616	0.264088
DIABLO	0.540903	1.83713
RNF227	0.538759	0.420201
TIFA	0.537848	1.4101
COL27A1	0.53784	0.500699
RPS29	0.537829	2.22915
ATP6V0C	0.537529	1.49913
CYP1B1	0.53573	0.78056
AMN1	0.532763	1.54171
QNG1	0.532328	0.229749
SAP30	0.531983	0.520893
CDKN2A	0.53099	1.90088
SGK2	0.528697	0.643614
TAX1BP1	0.524427	2.17855
SPZ1	0.523951	0.30044
ITIH3	0.518298	0.760516
CNN1	0.515784	0.354336
PSRC1	0.515483	0.261983
COQ2	0.513206	0.938026
ZBP1	0.512475	0.220913
PSAP	0.511994	1.768
FZD7	0.511144	1.6698
SAMD4A	0.510822	0.536045
HSPA1A;HSPA1B	0.508456	1.90101
MORF4L2	0.506308	1.48787
FOXO3	0.506285	2.46969
TEAD4	0.50425	0.272774
SERINC1	0.503419	4.25588
SIX5	0.500411	1.84561
STC1	0.499654	2.98244
FLVCR1	0.497264	1.44054
TRA2B	0.496806	3.45737
CASS4	0.494357	0.14726
SQSTM1	0.493868	1.72346
BRMS1	0.493661	0.606616
SMCO1	0.492833	0.374231
FAM210B	0.487242	0.57287
ZNF24	0.486898	1.69141
MCM8	0.486293	0.445065
PTPRZ1	0.483219	0.0630024
RAC1	0.483126	2.41808
UBE2H	0.481126	0.534681
DENND6A	0.480084	0.689954
UNC93B1	0.477514	1.62627
HSPA1L	0.472059	1.60801
LRIF1	0.471628	1.11425
LRP10	0.470587	2.51042
PCOTH	0.46888	1.15119
ADAMTS15	0.466919	0.461387
CCNL1	0.466136	2.25906
C4B_2	0.464088	0.934839
MMADHC	0.464088	1.0759
STYXL2	0.462517	0.218203
C3	0.461735	1.21532
IL13RA1	0.461317	1.05796
MPLKIP	0.461222	1.92987
FOSL1	0.460908	0.713486
NDUFAF8	0.456813	1.4243
COG2	0.456685	0.843246
NLRX1	0.456657	0.626547
CD320	0.454637	2.03352
EHBP1L1	0.451872	0.772103
SNTG1	0.451714	0.537981
PLAU	0.451258	3.32702
SLC27A1	0.451209	0.225444
NEXMIF	0.449774	0.907916
RNFT1	0.447374	0.734819
ETV3	0.446945	1.19954
AGPAT3	0.444495	2.12738
ICAM1	0.444325	1.96414
CKS2	0.439644	0.342893
PDX1	0.439471	0.218204
CGAS	0.43431	0.697727
PDZD11	0.434273	2.19921
ZNF654	0.432913	0.420142
TTC17	0.431135	0.51761
SLC39A9	0.431095	0.160254
SNX19	0.430833	0.280707
ZNF460	0.430578	1.18918
PCGF5	0.430148	1.34478
MMP2	0.429789	2.4496
BHLHE41	0.429431	0.417528
TTYH3	0.422003	1.19193
IQCJ	0.420772	0.305245
GADD45B	0.420643	0.179055
DENND2A	0.4198	0.255323
ZFP36L2	0.419254	2.42236
MYL12A;MYL12B	0.417999	2.26592
PZP	0.417555	0.501484
SEC61G	0.417264	1.65621
GUSB	0.416812	0.606806
TRMT10A	0.415482	1.39763
HAUS7	0.413899	0.751316
ZC3H12C	0.413797	0.296644
UBA52	0.411985	0.616853
TREML2	0.411599	0.185444
ITGB8	0.409728	0.410938
MGAT5	0.408566	0.685499
KRT76	0.408338	0.163661
SLC49A4	0.407935	1.4339
TMEM51	0.407522	0.65996
TSPAN3	0.407087	1.03012
SCAF8	0.406173	0.924646
BMPR2	0.405698	2.35634
ADAM12	0.405488	0.657625
COL6A1	0.405154	1.46735
CA5BP1	0.404576	0.852601
CENPA	0.404508	0.660079
SULT1A2	0.404175	0.371249
CPEB3	0.403226	0.894784
POMP	0.401794	1.38496
EIF2AK3	0.401619	2.03803
TIGD7	0.400806	0.409811
NAGLU	0.400176	0.468457
ITPRIP	0.399517	3.63385
BCAP29	0.396772	1.47841
BRDT	0.394709	0.178825
GSTT1	0.394292	2.45931
KAT14	0.393989	1.69173
JAM2	0.393342	2.3206
TMEM200A	0.39306	0.800375
CEP112	0.392043	0.557666
PRDM1	0.389988	0.416755
VEGFC	0.388077	1.31337
GAP43	0.386935	1.09987
PFKFB3	0.386465	1.31138
KGD4	0.386462	2.35044
SH3BP2	0.385031	0.204759
MRTO4	0.38489	1.71835
TBC1D1	0.384709	0.310757
TRIM37	0.381077	0.0821488
MAP4K2	0.379421	0.743682
HSPA6	0.375862	1.082
SLC25A36	0.374439	1.44901
MFGE8	0.372835	1.45225
RPP25	0.371232	0.386827
ING4	0.371044	0.631632
SPRR3	0.369399	0.771396
OSCP1	0.368825	0.682681
NOL4L	0.367347	1.08348
SERINC3	0.366999	2.26485
ARHGAP24	0.36699	1.33642
SOD2	0.365767	2.61116
WWP2	0.364931	2.3971
ZNF639	0.36304	0.346906
TNFRSF10B	0.362624	3.1582
CELSR2	0.362225	1.09257
CIB1	0.361739	1.73439
DDX47	0.359709	2.01003
LCOR	0.359653	0.810757
SASH1	0.359463	2.0216
CCDC71L	0.357937	1.05058
NDUFA1	0.357323	1.54098
CHIC2	0.355978	0.499241
CHST11	0.355709	1.10562
INPP5A	0.353987	0.340045
OPA3	0.352496	0.551379
RTL8B	0.351659	2.40122
LRP12	0.351388	0.919617
LOX	0.351124	1.25086
ARL4D	0.350619	0.526221
GPNMB	0.349863	1.65429
IGFBP6	0.349325	1.02254
GPATCH8	0.34902	0.583917
ZNF444	0.348018	0.329418
MANEAL	0.347703	0.640801
COX14	0.347158	1.12691
TMEM234	0.346471	0.863534
LOC128071544	0.345968	1.50925
KDM3A	0.342274	0.692652
PCDHGC3	0.342127	3.53136
POC5	0.341129	0.717115
A2M	0.339722	0.399902
APPBP2	0.339649	0.363352
STOML3	0.338193	2.38373
ATP5IF1	0.337379	3.32105
HABP2	0.337264	0.719793
NSMCE3	0.337079	1.4229
HEXIM2	0.3359	1.24186
USP20	0.334809	0.272482
SSBP3	0.334758	0.871702
TNFRSF10D	0.333492	1.83704
CASTOR1	0.333336	0.518999
SERPINF1	0.33289	0.501941
CCDC59	0.332443	1.0549
FEM1B	0.331388	1.73577
ODC1	0.329941	0.635343
PANX1	0.329485	0.948214
YEATS4	0.329437	1.77456
LAGE3	0.329187	1.57872
SDC4	0.328971	2.28107
MLF2	0.328965	2.11371
ARFGEF3	0.328307	0.0846465
PRKAA2	0.328084	3.04275
ATP6V0D1	0.327749	2.83702
SRXN1	0.327461	1.31694
SNHG12	0.326087	0.210788
SEMA3C	0.32567	0.672019
ANTXR1	0.324946	1.07554
VSIR	0.324916	0.708382
IFITM3	0.324579	2.3955
ADI1	0.323756	0.756482
CDC42EP4	0.323306	0.801937
SIDT2	0.323096	0.0757386
TMEM35B	0.322545	0.21233
YPEL5	0.321688	3.20672
PHF8	0.321251	1.3658
COA1	0.320134	2.25996
HERPUD2	0.32007	1.28529
AGTPBP1	0.319756	0.460215
CHD6	0.319452	2.14137
CPE	0.319284	2.69907
HDAC4	0.318874	3.95507
GPS2	0.318336	1.94237
MTPN	0.318303	1.02119
RGP1	0.318163	0.717161
TSPYL1	0.316769	0.789548
SPPL2A	0.315896	2.481
ME1	0.315821	0.565633
DGKE	0.31528	0.1381
PTCD1	0.314898	0.516316
GSTM4	0.314687	0.409354
TGFBR2	0.314468	1.2564
LAMA1	0.313868	0.808399
AGBL4	0.313539	0.11625
CENPV	0.312035	1.38157
ZEB2	0.310839	1.30302
ZNF644	0.310251	0.848697
CC2D2A	0.309639	0.743942
UPRT	0.308205	1.1307
AP4S1	0.308157	0.256126
C1orf105	0.308096	1.13934
TMEM248	0.307632	0.803561
MRGBP	0.307384	1.22204
ANTXR2	0.306988	3.55899
ITIH2	0.306562	0.939934
RTL8A	0.305902	2.84293
TVP23B	0.305595	1.2096
PCDHA1	0.305257	0.387482
MRPL58	0.304774	0.471515
DDR1	0.304519	0.714886
TIMP1	0.304224	0.78283
ZNF579	0.304138	2.02824
PROS1	0.302447	0.18347
TNFRSF1A	0.302081	0.866369
ERH	0.301573	1.49539
SLC38A2	0.301469	0.792972
FAU	0.300224	1.85954
FCGRT	0.30014	0.749825
RARA	0.299855	0.433701
OSTC	0.29858	1.06661
PRRT3	0.297807	0.975148
MDK	0.297648	0.735127
BARD1	0.297301	0.0872485
UGCG	0.297198	0.773939
TULP4	0.29704	0.210118
SPRED3	0.296815	0.366974
DAAM1	0.296144	0.827352
BRPF1	0.296137	1.07206
FAM234B	0.296064	0.608251
ZDHHC8	0.295713	0.822588
SECISBP2L	0.295554	0.648812
PHLDA1	0.295502	2.60915
NCAPG	0.295149	0.438769
HPGD	0.294571	0.207515
COPZ1	0.294038	1.36476
PFDN1	0.293903	1.08922
F3	0.293432	0.989969
XYLB	0.290888	0.0650109
GSTCD	0.290396	1.29042
FNBP4	0.289797	0.316135
BNIP1	0.289361	0.746037
MGST1	0.289307	1.90671
DCD	0.288568	0.569144
ITGA5	0.288285	2.17652
CDK2AP2	0.288197	1.97596
NCOA2	0.28784	0.634917
GPRC5C	0.28774	0.45785
IGFBP3	0.287737	1.10297
TXNRD3	0.287129	0.133574
PGK2	0.286699	1.32324
RIT1	0.28572	0.27955
SMCR8	0.284306	0.354404
DLG4	0.283812	0.866832
ZNF160	0.28374	0.18745
KLHL25	0.283284	0.895236
SPINK5	0.282677	0.0972457
GLP2R	0.282246	0.374322
TESK1	0.28183	0.200839
GRN	0.281477	0.876399
GOLT1B	0.281046	0.911791
ACTB	0.281031	2.87656
F11	0.280753	0.917111
CHTF8	0.28072	0.791721
LURAP1L	0.280435	0.328046
TXNIP	0.280345	1.52858
PLTP	0.279966	0.94724
SUPT4H1	0.27926	2.31616
IRS2	0.279182	0.666597
DHRS13	0.278932	1.42865
CAPN11	0.277421	0.0647725
SGSM3	0.277291	0.331006
RPL21	0.277026	0.919318
SELENOM	0.276131	0.423765
SLC1A4	0.275572	0.571005
CEP41	0.274009	0.390877
SRD5A3	0.273944	0.699041
REEP2	0.273318	0.514256
FTSJ1	0.272091	1.10216
IKBKE	0.271544	0.533428
CHEK2	0.271091	0.151916
KIF23	0.269435	0.140822
NTHL1	0.269166	2.53151
LRP8	0.267888	0.443994
H2AZ1;H2AZ2	0.267782	1.70685
WIPI1	0.265852	1.78223
MMP14	0.265525	2.52238
SPC24	0.265395	0.34529
CACTIN	0.265317	2.50738
LITAF	0.265171	1.20249
NDUFAB1	0.265128	4.19566
MFSD14A	0.265043	0.557364
CD46	0.265017	2.29868
PUS7L	0.264818	0.951696
DPY30	0.264169	0.569452
MED13L	0.263859	0.576318
ZNF511	0.26351	1.16913
ABCD4	0.263506	1.32116
TNFAIP8	0.26314	0.677215
LTBR	0.263089	0.891599
COPE	0.262637	1.58941
CD274	0.262429	0.779753
IFIT2	0.261943	1.0604
ANAPC16	0.26177	0.482602
AIRIM	0.261126	0.66466
ABCC3	0.260623	0.138553
ENOSF1	0.260145	0.943946
COA4	0.259979	0.688716
ZMIZ1	0.259733	1.83077
KIF13A	0.259623	1.04688
TONSL	0.259039	0.124392
PMM2	0.25838	0.750679
ANKS1A	0.257893	0.763309
MCC	0.257554	0.654401
GZF1	0.256732	0.692643
LENG8	0.256175	1.79316
IGHV5-10-1	0.25455	0.619479
CNIH3	0.252598	0.652039
RRM1	0.252511	0.386867
WDR54	0.252138	0.221592
TLE5	0.2512	1.88865
CMKLR1	0.251185	0.575588
BACE1	0.250522	0.788058
PXDC1	0.249632	1.39298
CEP128	0.249544	0.150401
TFAP2E	0.24825	0.327287
SNRPF	0.247816	1.27881
C12orf57	0.247684	0.47394
CHST7	0.246564	1.44583
UMAD1	0.246159	0.75856
PRPF38B	0.245626	0.959497
PCDHGB7	0.245558	0.813897
DDX25	0.245075	0.805797
NCOA6	0.244643	0.88813
TADA2B	0.244383	1.22463
RAB12	0.24419	2.78116
SYT1	0.243984	1.70257
HRK	0.242875	1.50296
EMG1	0.242638	0.497189
YIPF1	0.242483	1.37365
TIMM8B	0.2424	0.51074
OGFOD3	0.242263	0.797084
GGT2P	0.242246	0.183008
SEZ6L2	0.242207	0.794926
ZNF503	0.242133	0.248446
NR2E1	0.242108	0.133231
KCTD10	0.241917	1.94761
LARP6	0.241777	1.48558
NRP2	0.241666	1.95047
U2AF1	0.241455	3.03571
HINT2	0.241182	2.43204
TINF2	0.240506	0.191065
SCAF4	0.240231	2.11079
BLOC1S1	0.240195	2.0868
ARRB1	0.239192	0.940595
TGFB2	0.239126	0.711151
WASHC3	0.23907	0.922191
UCK2	0.237514	0.390456
RBM15	0.237508	0.0439624
TMEM164	0.236872	1.39813
SMARCD1	0.236567	1.04916
CLN6	0.236553	2.09206
RBBP5	0.236457	1.14146
SLC25A26	0.236427	0.367633
ELOVL5	0.236224	0.396424
MED26	0.23598	0.741517
CNOT2	0.23539	2.97778
TRAF1	0.235329	1.87511
RNF138	0.234936	0.150329
ADAM8	0.234825	0.419049
HRH1	0.234761	0.724008
PSMD14	0.234556	1.87035
APOO	0.233866	2.29685
TAP1	0.233795	2.41862
KIAA0930	0.233775	1.58441
GJA1	0.233407	2.11557
TTC39B	0.233193	0.172612
MT1F	0.232642	0.283769
HMGA2	0.23243	2.17424
AIG1	0.232129	0.314724
TMEM132A	0.231999	1.21617
PLPP3	0.230878	0.938076
ABT1	0.230793	2.38846
STRIP2	0.23038	0.447432
DSTYK	0.229986	1.19505
EPHB4	0.229877	0.814903
NFATC2IP	0.229436	0.189079
SERPINC1	0.229221	1.40862
PHLDA2	0.22838	2.89204
ANGPTL4	0.227719	0.497573
VWDE	0.227484	0.0469002
JAG2	0.226639	0.322123
IRAK3	0.226561	1.16559
HES1	0.226225	0.176414
BLOC1S4	0.226118	2.25309
SDCBP	0.226049	0.709602
IL6ST	0.225695	2.20017
CNNM4	0.224849	0.293982
IFT43	0.224361	1.16719
STX6	0.2241	1.14781
ZBTB21	0.224081	1.02059
STX1A	0.223684	0.586736
DCP1A	0.223448	2.55704
CDK11A	0.223197	0.929232
FGFR1OP2	0.222881	1.28287
KCTD7	0.222534	0.492216
GATB	0.220481	0.867355
SLC39A1	0.220474	1.09823
JMJD1C	0.219893	0.902636
TRMT61B	0.219866	0.486511
CYCS	0.219449	3.18171
HMGXB3	0.219224	0.0546814
KCTD18	0.218194	0.306334
MICA	0.218111	1.08932
TNFAIP2	0.217443	1.38758
UPF3A	0.217184	1.37337
SOS2	0.217133	0.378868
SEMA3B	0.217047	1.03419
BTBD1	0.216855	1.56866
DYNC2LI1	0.216696	0.151326
YAF2	0.216626	1.86707
CBR3	0.216311	1.12408
FAT1	0.215645	1.82408
LMTK2	0.21501	0.290997
TUFT1	0.214942	1.11974
MGME1	0.214897	0.305439
INSR	0.214477	0.922726
ABCA1	0.213887	0.391154
CIR1	0.213224	0.865871
PSEN2	0.2129	0.428608
ITFG1	0.212694	0.699351
LDLR	0.210777	0.727269
EXOSC1	0.210189	1.4003
DHX58	0.210008	0.165306
LRRFIP2	0.210003	1.92719
FAM53C	0.209897	0.487174
SAC3D1	0.209873	0.181397
ADAM9	0.209815	3.60491
DDR2	0.209746	0.909462
DCTPP1	0.208938	1.13409
DSCC1	0.208834	0.505337
HMOX1	0.208604	0.77746
SYPL1	0.20808	0.795156
ADAM19	0.207408	0.576944
DGCR2	0.207284	0.492459
TFPI2	0.207244	0.317557
CAB39L	0.206949	0.228851
SCML2	0.206797	0.381756
OSMR	0.206633	0.67528
TMEM69	0.20648	1.41266
KLHL36	0.206402	0.629136
GPR143	0.205971	0.822718
ANKRD39	0.205466	0.316069
RNF115	0.205434	0.670056
PTMA	0.205372	2.57141
SREK1	0.205256	0.235263
CYSRT1	0.204974	0.159325
LOXL3	0.204752	0.955825
GLTP	0.204648	2.35181
PPP3CC	0.204648	1.4563
HACE1	0.203805	0.347213
YRDC	0.20377	0.629398
AATF	0.203575	0.659255
METTL21A	0.203269	1.53196
PPP1R10	0.202569	2.03682
C9	0.202426	0.209915
RAB21	0.20238	2.05935
COL5A2	0.202343	0.518762
TBC1D10A	0.202045	0.883208
ZFAND5	0.201992	0.942184
POFUT1	0.201931	0.957526
HMG20A	0.201721	0.380069
HSD17B11	0.201586	0.567763
TNFAIP1	0.20132	1.02451
SCD5	0.201295	0.881884
TAF8	0.201288	0.648961
CALCOCO2	0.201124	0.715023
POLR1H	0.200723	0.278213
ELOF1	0.200315	0.851228
SLC39A11	0.200274	0.711011
ALAD	0.200274	0.705189
TXNDC15	0.200128	1.10365
SCYL3	0.200069	1.23088
CPZ	0.199795	0.230263
EVL	0.199484	0.721496
ZC3H13	0.198985	1.76849
FBXL12	0.198795	0.554211
TUBB3	0.198636	1.71669
PIGX	0.197608	0.441445
H2BC26	0.197444	1.85979
HECW2	0.197267	1.20745
CRYAB	0.197076	1.12908
SMIM12	0.196985	1.41282
MEIS3P1	0.196843	0.620252
SSBP4	0.196611	1.21064
ING1	0.196068	2.17825
TCTN3	0.195553	1.1642
UXT	0.194714	0.739771
RAB29	0.194581	1.29608
TYW5	0.194564	0.117208
UBR3	0.194523	0.981237
FBLN2	0.194272	0.593922
POGK	0.194234	0.811264
FAM234A	0.193893	0.53194
UBE2S	0.193452	0.136495
SNX21	0.193386	0.588543
DDAH2	0.193007	0.912166
TOMM22	0.192746	0.561393
PGAM1	0.192424	1.26048
ERLIN1	0.192121	0.464027
SERPINE1	0.192118	0.63234
STK19	0.192111	0.265531
MT2A	0.192012	0.623961
TLK2	0.191987	0.609105
ZNF736	0.191641	0.358872
EVA1A	0.191448	0.444951
POLR2L	0.190633	0.923542
CDK5RAP1	0.190303	1.46001
ARSJ	0.19007	0.286581
NPEPPS	0.189794	0.796248
SNX11	0.189683	0.087076
MPZL1	0.18936	1.43043
ZBTB7A	0.189295	0.568889
ATP5MG	0.18897	2.4894
JAK3	0.188482	0.948271
SLC29A1	0.188071	1.5351
ATXN1	0.188071	0.923275
ZNF629	0.187548	4.35888
SAMD8	0.187336	0.660216
CENPS	0.187211	0.492627
KDM2A	0.186762	1.2462
NTN4	0.186213	1.68666
OS9	0.185777	0.826121
IBTK	0.185329	1.67736
DENND1A	0.184794	0.869852
NUDT4	0.184757	0.917452
TXNDC5	0.184504	0.503868
SIAH1	0.184357	0.476528
OBSL1	0.184219	1.2946
TAGLN3	0.184052	0.23974
ITGA6	0.183905	0.30704
NOP10	0.183865	2.42975
LRIG1	0.183723	0.730125
DUSP23	0.183636	1.72346
KCNG4	0.183379	0.564786
BAK1	0.183216	0.529952
RGL2	0.183216	1.76642
NFYA	0.183119	1.32892
TMEM185B	0.182856	0.69577
PMF1	0.182535	0.54177
GLOD4	0.182423	1.10185
NAPG	0.182268	0.297215
NDOR1	0.182257	0.635534
COX7C	0.182178	1.0373
IL1RAP	0.182119	1.47216
PHF10	0.181862	1.00147
FNTB	0.181833	1.17455
LIN7C	0.181668	1.114
ATXN3	0.181515	1.47111
RPP25L	0.181154	1.42407
MT-CO1	0.181133	0.522732
BEX1	0.181018	0.275901
CLCN6	0.180876	0.440216
ZC2HC1A	0.180738	1.19406
SLCO3A1	0.180503	1.24762
ASPH	0.18046	0.369064
AMBRA1	0.179801	0.473414
ZNHIT2	0.179439	0.621661
KCTD4	0.179333	0.695212
GLIPR2	0.179262	0.64566
UBE2I	0.179161	2.18215
NFIC	0.179063	1.74024
NPEPL1	0.178902	0.629166
RASSF7	0.17839	0.174851
AFP	0.178385	0.125547
UQCC4	0.178031	0.155314
IGHV3OR16-17	0.177956	0.192241
RAD51D	0.177904	0.263758
CXXC1	0.177675	1.32541
SFR1	0.17766	0.265284
HSPB8	0.177407	2.00636
PPM1F	0.177334	2.18909
CUTC	0.177292	0.98669
GPRIN1	0.177233	0.998144
CCDC91	0.176973	0.385836
TGFBR1	0.176394	0.846392
NDUFB6	0.176281	0.718616
PRSS23	0.17598	0.689275
RBM45	0.175948	1.48873
LRRC8E	0.175838	0.470807
FOXK1	0.175749	2.10854
DKK1	0.175708	0.390235
TRIM44	0.1757	0.168916
HMSD	0.17568	0.446538
DCAF5	0.175663	1.80691
MEF2A	0.175452	0.966554
CXADR	0.175155	0.223555
PYGO2	0.174653	1.6618
TRAF6	0.1746	0.624613
ATG7	0.17448	0.496333
PTTG1IP	0.174442	1.37695
MTX2	0.174209	2.08141
CCDC117	0.173777	1.10304
GRHPR	0.173333	1.88245
FZD1	0.173333	0.61475
EDIL3	0.173083	1.04745
ARHGAP31	0.172901	0.841759
ANOS1	0.172867	0.671881
TSC22D1	0.17277	0.340168
MBTPS2	0.172763	1.71667
STRADA	0.172406	1.82225
ILRUN	0.172309	0.316419
IRAK1	0.171966	1.30687
FSTL3	0.17158	0.725244
SLC5A1	0.171501	0.10574
STARD9	0.171144	0.723233
TMEM106B	0.171087	1.43825
ATAD2	0.170977	0.143737
IFNGR1	0.170851	0.526506
MEAF6	0.17074	1.20279
IFT25	0.170533	1.0451
SNRPE	0.170503	1.53516
TMEM50B	0.17049	1.18452
TM7SF3	0.170343	0.642814
LRCH2	0.170039	0.281193
SLC2A10	0.169554	0.260233
VGLL4	0.16946	0.705905
IGKJ4	0.169456	0.215334
WDR47	0.169209	1.34202
RABGAP1	0.169044	0.220083
ICMT	0.168812	1.00383
ABCG2	0.168742	0.38991
FAM193B	0.168342	0.419457
PAFAH1B2	0.168264	0.894899
CEP78	0.167963	0.209857
ADGRL4	0.167946	1.50233
POMT1	0.167787	0.804461
CENPC	0.167728	2.55287
ASB1	0.167714	0.62917
PDGFRB	0.167665	0.438785
ZNF581	0.166876	0.111793
CIT	0.166663	0.0793049
ELP5	0.166527	0.517139
SIX3	0.166407	1.75092
JUND	0.166279	0.697046
MICB	0.165745	0.701535
SV2A	0.165744	1.18863
CYSTM1	0.165422	1.64972
SMPD2	0.165067	0.386299
MTFR1	0.165012	0.698167
UAP1L1	0.164975	0.506083
LMAN1L	0.164817	0.0499179
RRP15	0.164373	1.29219
PHC2	0.164139	1.744
COASY	0.164095	0.954623
BACH1	0.164079	1.16054
BAGE3	0.163964	0.116288
FAM20C	0.163582	0.507745
SPHK1	0.16352	0.319025
CHPF	0.163415	0.806349
NRDE2	0.163343	0.550973
AGO3	0.163142	0.394092
UQCRB	0.163081	2.57019
ACVR1	0.162923	2.22715
AGAP3	0.162821	1.44748
MEF2C	0.162598	1.9709
DNAL4	0.161845	0.344427
NSMCE1	0.16173	1.12538
WDR89	0.161496	0.521005
RPL34	0.161487	1.63008
MTHFSD	0.161063	0.464468
RYBP	0.161054	0.703716
SGSH	0.160963	0.449107
DDX19B	0.160767	0.32499
ORMDL3	0.160707	0.721652
WASHC1	0.160545	0.696662
TRAPPC3	0.16037	1.66485
TSPAN9	0.160307	0.379953
NUFIP1	0.160191	0.323271
PEX10	0.160142	0.36523
GLRX	0.159946	0.594477
EIF4EBP2	0.159901	0.5371
HABP4	0.159662	1.72858
WDHD1	0.159636	0.161561
PLAUR	0.159599	1.73181
CIZ1	0.159419	0.881112
TTC33	0.159228	0.709827
SURF2	0.158925	0.552945
COA3	0.158274	0.732943
TFAP2C	0.158239	0.232857
TM2D3	0.158084	0.995465
MIDEAS	0.157914	1.71761
MRPS18C	0.157801	1.65765
ARK2N	0.157604	2.79086
C7orf25	0.157571	1.02354
CDR1	0.157506	0.0738773
SRSF4	0.157245	0.339493
CLN8	0.157132	0.400977
GGNBP2	0.15712	0.380803
TAGLN2	0.156973	1.15209
RABEP2	0.156877	0.235547
NRAS	0.156825	0.975417
COX6C	0.156814	1.38134
ZNF574	0.156635	1.16108
FGGY	0.156576	0.0963418
PARP15	0.156414	0.0622529
ANPEP	0.156279	1.12751
NCAPH	0.156207	0.420549
MAZ	0.156169	0.599988
STEEP1	0.156076	0.541115
S100PBP	0.156019	0.448983
LEPROTL1	0.155959	0.508887
PHKG2	0.155898	1.18522
FMNL1	0.155828	0.929379
ATG101	0.15559	0.74883
DHX32	0.155573	0.83527
KLHL10	0.155551	0.0992344
R3HDM4	0.155376	0.61351
PIK3C3	0.155305	0.0930639
GMEB1	0.155075	1.28547
DTWD1	0.154789	0.430395
TSPAN4	0.154623	2.18189
LAMTOR5	0.154622	0.492595
GYG1	0.154499	2.36579
MTFP1	0.154438	0.927684
USP35	0.154261	0.307602
SFT2D2	0.153842	0.703378
DUSP11	0.153428	0.358982
EEF1AKMT2	0.153411	2.0917
RAB11FIP1	0.153275	0.693271
THEM4	0.153235	0.366574
DUS2	0.152681	0.868053
STK38L	0.152426	0.545449
TGS1	0.152363	0.59023
MAP1LC3B	0.152355	0.685146
UBL3	0.152328	0.991618
NEDD4L	0.152245	0.641563
PTPRF	0.152101	0.394755
GSTM3	0.152098	0.873861
ZBTB9	0.152051	0.749731
RECQL5	0.15199	0.280455
APBB1IP	0.151942	0.725779
FILIP1L	0.151931	0.414627
GABARAPL2	0.151661	1.19926
NDUFAF7	0.151615	1.30652
MSMO1	0.151585	0.376416
BORCS7	0.151273	0.483953
LRCH1	0.151268	0.204732
RAB11A	0.151168	0.442472
EID1	0.151137	0.299485
EED	0.151087	0.346564
ARRDC1	0.150978	0.376635
TBC1D17	0.15097	0.49152
RTRAF	0.150854	2.36835
MITD1	0.150482	0.768478
ABCB6	0.150226	0.258619
LEPROT	0.150209	0.383842
PHF20L1	0.149818	0.327853
BCAR3	0.149796	0.24213
ABHD10	0.14975	0.494506
BTF3	0.149715	0.85455
SIRT1	0.149683	1.35427
BRAP	0.149455	1.23507
PIGM	0.148918	0.796917
PSMG4	0.148781	0.628821
WTAP	0.14872	1.24002
CLSTN1	0.148668	0.654971
ECHS1	0.148554	1.70277
PMS2CL	0.148439	0.268345
KIF14	0.148301	0.191826
MAGOH	0.148237	1.31009
NME6	0.147898	0.935127
ABHD4	0.147863	1.362
UQCRQ	0.147795	1.22022
TIMM50	0.147621	0.993859
IFT88	0.147523	0.75266
FBN2	0.147502	0.777163
ACTR8	0.147421	0.445503
OGFRL1	0.147303	0.518111
PPIL1	0.147237	0.708524
TMX4	0.147018	0.249152
TRPM4	0.14666	0.315414
PHTF2	0.146597	0.465466
PITPNM2	0.145458	0.286691
PORCN	0.145391	0.278814
POLD2	0.144945	0.218405
PREP	0.144935	0.0714337
DNAJC11	0.144871	1.41805
MRPS10	0.144854	0.899909
HSPBP1	0.144738	1.00305
ALK	0.144629	0.738757
TRAPPC1	0.144485	1.83987
VAMP3	0.144468	1.9985
ICE2	0.14436	0.277838
LRRC20	0.144052	0.577023
AP1G2	0.14382	0.229701
PHACTR2	0.143636	0.94552
CCPG1	0.143455	0.343116
CYB5B	0.143206	0.848713
SGTA	0.143201	1.65337
ATG4A	0.143124	0.521234
CDK13	0.142433	1.31153
PNISR	0.142356	0.830823
FASTK	0.142278	0.574647
CCDC167	0.142175	1.6842
GMEB2	0.142003	0.522605
ACTR2	0.141876	0.894469
ATP5PO	0.141444	1.61917
DISP3	0.141401	0.201986
PSPH	0.141291	0.308023
SLC3A2	0.141288	1.1086
KBTBD6	0.141176	0.348821
USP28	0.141112	0.304625
AKR1C3	0.141064	0.136554
SAR1B	0.140964	0.589769
TTL	0.140961	0.75339
FDFT1	0.140951	0.17272
ACOX1	0.14084	0.831271
TTC12	0.140312	0.226542
THTPA	0.140304	1.91101
PDLIM4	0.140209	0.771629
GPR180	0.140125	1.32102
ZCCHC24	0.139964	0.29285
ZNRF2	0.139801	0.392633
CCBE1	0.139582	0.220847
PPTC7	0.139524	0.659628
TRAPPC9	0.139461	1.2074
NUP42	0.139423	0.979535
INTS14	0.139362	1.30037
XRCC5	0.13911	1.80577
MT-ND5	0.139058	1.0578
LRRC17	0.139043	0.365405
COMTD1	0.139011	1.41803
EVI2B	0.138985	0.826882
SRPX	0.138882	0.653991
DNAJB1	0.13888	1.09289
LMAN2	0.138418	0.583491
TSPAN13	0.138385	1.43503
RPL28	0.138098	1.04171
RPL10	0.13808	1.6406
SELENOF	0.137966	0.532438
GALT	0.137757	0.744008
UTP11	0.137573	0.554924
TGFBRAP1	0.137284	0.644998
CHD2	0.137272	1.03759
PYCR2	0.137174	0.760829
RPL29	0.137113	0.308378
ZNF362	0.137075	0.31005
TERF2IP	0.137057	1.03218
TYMS	0.136983	0.0538527
TOR1AIP1	0.13698	1.26606
MEX3B	0.136957	0.249837
HLA-C	0.136897	0.537943
TEP1	0.136829	0.926184
PEG10	0.136621	0.364006
EXTL2	0.136538	0.840441
ZNF622	0.136479	1.18782
SP1	0.136395	1.53412
PBX2	0.13614	0.629097
KDELR3	0.136104	0.267953
TP53RK	0.136068	0.724313
BAX	0.136052	2.25327
CLPTM1	0.135853	2.41934
RDH11	0.135755	1.37833
RPL7L1	0.135747	1.00652
B3GLCT	0.135742	0.852193
PARP2	0.135548	0.0926647
PRKRA	0.135359	1.79756
SZRD1	0.135162	0.709135
ALG9	0.135052	1.64138
LHFPL2	0.135023	0.43214
AP4M1	0.135012	0.995678
YBX1	0.134918	0.761465
ALKBH5	0.134871	1.24205
RPL19	0.134734	0.940756
NAV2	0.134527	0.224312
NPRL3	0.13419	0.448392
EMC9	0.133909	0.272606
RBBP9	0.133553	0.780345
IPO7	0.133436	0.593179
ZCWPW2	0.133326	0.135017
CSNK1G1	0.133246	1.885
RAB5C	0.133229	3.13381
DNAJC13	0.13308	0.0560304
CLCC1	0.133048	0.481981
NPHP4	0.132955	0.253069
TEX264	0.132868	0.498186
SYVN1	0.132468	1.23349
PDAP1	0.13234	1.66462
KIAA2013	0.132205	1.23946
EPB41	0.132081	0.167571
MBLAC1	0.131934	0.709818
SLC44A1	0.131775	0.580316
ANTKMT	0.131774	0.136389
TMEM35A	0.131771	0.595676
SMAD4	0.131625	0.428232
CHMP2A	0.131517	0.535693
TMEM9B	0.131466	0.71584
CIAO2B	0.131259	0.483685
RDH10	0.131197	0.201428
CHD9	0.13111	0.257106
FAM162A	0.131082	0.498559
CPD	0.130784	0.824953
CUTA	0.130685	0.478929
LIN37	0.130601	0.193045
SETMAR	0.130578	0.535093
SLC11A2	0.130478	0.230507
DAXX	0.130452	0.808889
TMUB2	0.130379	0.210958
RPS15	0.130136	1.83649
PLSCR3	0.130114	0.964645
PGAP6	0.129885	0.478618
TMEM184B	0.129828	0.38837
PDCD4	0.129821	0.468417
DNAJC25	0.129763	0.885846
KIRREL1	0.129597	1.44691
MOSPD2	0.129557	0.313812
SOD3	0.129456	0.250806
SON	0.129131	1.28019
MYD88	0.129008	1.46714
HYI	0.128944	2.45377
POGLUT3	0.128583	0.716143
EMC4	0.128489	0.701789
GCAT	0.128381	1.03141
CLNS1A	0.128326	0.531542
THOC7	0.128284	1.52707
INO80C	0.127914	0.404055
PITPNM1	0.127815	0.560868
CSRP1	0.127779	0.282323
SHOC2	0.127673	1.28385
ZNF281	0.127647	0.486638
GUK1	0.127505	1.27769
IQCJ-SCHIP1	0.127471	0.425935
ZKSCAN1	0.127277	1.56032
ADAM10	0.127197	2.19635
TCTN1	0.127085	0.173724
SLU7	0.126904	1.56176
CMC4	0.126731	0.133415
MEST	0.126485	0.251594
TEFM	0.126282	0.912312
SLC4A7	0.126144	0.522956
INPP5K	0.126068	1.11455
GLRX5	0.125804	2.18863
NOSIP	0.125759	0.505591
GPR148	0.125746	0.293324
TGOLN2	0.125732	1.43163
HMGXB4	0.125576	0.676193
TSFM	0.125547	0.811438
NRP1	0.125544	1.38212
MLX	0.125373	0.422181
TRMT6	0.125317	0.608168
HDAC1	0.12521	1.35495
YIPF6	0.125168	0.720672
CMSS1	0.125109	0.163118
ERP29	0.125084	0.952975
RASAL2	0.124976	0.615846
RAB2B	0.124862	0.499831
CNTNAP3	0.124829	0.30066
POLR2G	0.124821	0.857834
GANAB	0.124797	0.961906
CCDC181	0.124723	0.0426728
KRTCAP2	0.124587	0.40484
ACAT2	0.124387	0.159855
DTD1	0.124285	1.51092
DNAAF10	0.124221	0.874925
ALDH7A1	0.12419	0.824801
RUNX2	0.124077	1.27997
DLC1	0.124076	0.380508
ITGB1	0.124032	1.08468
ZNF443	0.124026	0.0344819
MLYCD	0.123908	0.779131
STX8	0.123812	0.80828
P2RX4	0.12381	0.167229
TTC21A	0.123764	0.326503
MMGT1	0.123745	0.545118
LSM3	0.123583	0.443823
HMGB1	0.12358	1.06322
FADS2B	0.12317	0.444003
TRIM8	0.123147	0.0753593
TM9SF1	0.123135	0.923438
MBD1	0.122935	1.22829
STN1	0.122835	0.335855
TTC7A	0.122753	0.675138
HDAC7	0.122695	2.89012
SMDT1	0.122488	0.467206
CMTR2	0.122438	0.280485
B4GAT1	0.122356	0.535575
MRPS28	0.122306	1.05118
CHID1	0.122293	0.355508
FUCA2	0.122065	0.288999
SERPINF2	0.121777	0.305098
TSPAN5	0.121298	1.02744
MLPH	0.121199	1.92568
SLC35A2	0.121172	0.394232
MANBAL	0.121064	0.623008
GPRC5A	0.120976	1.00935
CRADD	0.120847	0.459473
C17orf75	0.120816	2.65425
RTKN	0.120778	0.728751
ERRFI1	0.12077	0.654826
COPS3	0.120619	0.354509
GTF3C3	0.12056	1.39014
ZNF428	0.120494	0.712429
ATPAF1	0.120465	0.260875
CCNK	0.120434	1.15017
TMEM179B	0.120368	0.654535
MRPS9	0.120241	0.758076
NMNAT1	0.120024	0.742267
NOL7	0.11997	0.468196
ZDHHC20	0.119933	0.859155
KAT5	0.11975	0.456009
ITGA3	0.119741	2.62112
STOM	0.11973	0.455072
MBTPS1	0.119423	0.282556
HES3	0.119384	0.810771
PMS2P11	0.119383	0.430425
CCS	0.119287	0.350471
ISOC2	0.119042	0.466718
TYW3	0.118939	0.757955
B3GAT3	0.118741	0.674183
CALHM2	0.118722	0.277139
PRR16	0.118694	1.12961
RTTN	0.118692	0.249121
LMBRD2	0.118683	0.633965
ZNF818P	0.11865	0.317699
HEG1	0.118619	0.444721
C11orf54	0.118495	0.831518
CDK8	0.118265	1.46454
ROMO1	0.118151	0.839414
ATP2B2	0.118107	1.0868
OTUD7B	0.117903	1.11594
HNRNPA1L2	0.117535	0.797134
THY1	0.117524	0.356389
STX4	0.117494	1.26165
PWWP3A	0.117438	0.574332
MYH10	0.117423	0.911063
SLC7A11	0.117412	0.105007
TPM3	0.117408	3.36475
MRPL53	0.117341	0.586863
FOXK2	0.117311	0.389007
RRAGA	0.117014	0.902439
ANK3	0.117014	1.13911
PTGES2	0.117001	0.252554
HSD17B7	0.116938	0.254988
MXRA8	0.116891	1.05257
PRMT6	0.116765	0.799515
RARS2	0.116671	2.10369
TUT4	0.11661	0.758761
CCNT2	0.116597	0.887517
SHQ1	0.116474	0.329518
PALS1	0.116469	0.803621
SEPTIN6	0.116404	0.308216
CNIH4	0.116381	0.708979
COP1	0.116377	0.183982
SPARC	0.116357	0.172736
H2AC21	0.116277	0.482385
CDK7	0.116271	0.499916
CDAN1	0.116233	0.889205
CADM4	0.116186	0.170583
FGFRL1	0.116119	0.279951
VPS13B	0.115934	1.25719
POM121	0.115775	2.06333
CNOT9	0.115646	0.820874
TMEM67	0.115628	0.424717
HMBS	0.115613	0.431815
PCYOX1L	0.115538	0.874918
PALD1	0.115538	0.561069
SCD	0.115316	0.464152
FOXJ3	0.115283	0.880097
MTARC2	0.115264	2.41868
MBNL2	0.114944	0.481951
ARPC3	0.114711	1.19337
SLC9A1	0.114612	0.741249
ATAD3A	0.114274	1.23632
IDI1	0.114137	0.197754
FARP2	0.114073	0.392739
FBXO17	0.114032	0.475205
H1-3	0.113974	0.944006
CD68	0.113971	0.492307
RMC1	0.113962	1.56399
XPR1	0.113928	1.32274
RIOK3	0.113886	0.280006
C5orf24	0.113791	0.912041
LRP1	0.113728	0.34053
CLEC9A	0.113661	0.246521
PPP1CA	0.113537	1.42297
AAGAB	0.113386	0.658863
CALR	0.113226	0.290327
SCARB1	0.113145	0.421335
ARFGEF2	0.113138	1.89588
WDR6	0.113127	1.50582
DNAJC14	0.113038	0.0749356
PTRH2	0.112944	1.27127
HSDL2	0.112612	0.670888
VTI1A	0.11252	0.429877
STARD7	0.112471	0.661128
B9D1	0.112437	0.790298
CCNDBP1	0.112321	0.200022
RBMXL1	0.112158	1.68677
GEMIN2	0.112145	0.397963
BTN2A1	0.112092	0.694705
SLC38A1	0.112088	0.10533
RBM24	0.112049	0.252605
MRPS33	0.112038	1.35011
KBTBD11	0.112037	0.454886
PGPEP1	0.111885	0.23171
IPO4	0.111851	1.51156
GBA2	0.111715	0.22365
NR2F6	0.111637	1.99019
GPATCH1	0.111576	0.0943759
REPIN1	0.111537	0.228708
NIPA1	0.111467	0.382252
WDR46	0.111077	0.615515
CDK6	0.111062	0.839824
FN3K	0.111005	0.347601
DGCR8	0.110943	0.986477
RFX1	0.110888	0.793932
RPS27	0.110845	0.724293
TDP1	0.110725	0.53975
RBX1	0.11072	0.916877
AGPAT2	0.110638	0.823001
ALDOC	0.110379	0.339368
PYM1	0.110362	0.898278
ELOB	0.110102	1.47254
HMGB2	0.110085	1.34076
SNRNP27	0.109856	0.538422
PDGFC	0.109695	0.443469
ITGA4	0.109663	0.272952
PIGT	0.109559	0.0899113
SIL1	0.109531	0.380096
CD82	0.109519	0.439398
CPSF6	0.109079	1.937
PSMC2	0.109048	1.87429
TMEM231	0.109001	0.39749
HDGF	0.108994	0.797391
ATP6AP2	0.108814	0.983621
RUNX1	0.108657	0.535242
RCOR3	0.108638	0.614593
ARHGEF6	0.108567	0.885832
NHP2	0.108562	0.524363
TMEM245	0.108424	0.569445
ZBTB1	0.108323	0.567396
ZHX3	0.10827	0.0834585
ARHGEF3	0.108191	0.326188
PCBD2	0.108184	0.348047
UNC119	0.108138	0.845446
RPRD1B	0.107835	0.664016
NAXD	0.107705	0.505364
B9D2	0.107487	0.330206
PODXL	0.107454	0.330886
SDE2	0.10742	0.602058
CFAP20	0.107276	1.2932
SH2D5	0.107265	0.236448
DPH1	0.107229	1.02372
MED17	0.107161	1.06892
WBP4	0.107155	0.0175062
TFDP1	0.107056	0.175536
FNTA	0.106898	1.02551
SCLY	0.106893	0.516424
CD63	0.106884	0.46421
CD59	0.106774	0.732279
PTK6	0.106694	0.745248
ZRANB2	0.106623	0.689685
CNOT11	0.10648	1.31395
AP1S3	0.10644	0.431818
LUC7L2	0.106361	1.2691
ENY2	0.106238	0.312341
MAP2K5	0.106157	0.173121
SCAF11	0.10605	0.272132
TTI2	0.106032	0.20953
MTRES1	0.106002	1.11742
SGMS2	0.105836	0.255785
STK10	0.105811	2.10325
IFT22	0.105711	0.357913
TRIM27	0.105613	0.329581
STEAP2	0.105558	0.363792
OR2T27;OR2T7	0.105401	0.0553862
AIFM2	0.105349	1.19312
LIAS	0.10532	0.0490471
CARD19	0.105314	0.858179
CDK5	0.105286	1.12797
CTDSP1	0.105233	0.680033
NUDT16	0.105111	0.728388
DYNLRB1	0.104989	0.728346
RLIM	0.104983	0.19835
RPS6KB1	0.104914	1.16177
SPPL2B	0.10487	0.811847
AAMDC	0.104866	0.362426
TCAF2	0.104718	0.303375
HAUS8	0.104568	0.283029
CENPM	0.104357	0.0748533
EXOSC6	0.104327	0.718198
PIP5K1C	0.10432	0.327923
TNIP1	0.104239	0.476876
BSCL2	0.104225	0.645945
IFRD2	0.104137	0.158516
PGAP4	0.104098	0.424369
GREM1	0.104085	0.140173
TMCO1	0.103942	0.789049
PHB2	0.103912	1.26985
GOLGA7	0.103864	1.3684
LSMEM1	0.103811	0.0354733
TMEM120A	0.103683	0.196321
ATP6V1D	0.103682	1.48528
SRSF9	0.103583	1.68378
BRD3	0.103461	0.647918
ZNF787	0.103387	1.42205
FER	0.103278	0.995407
FLCN	0.103268	0.546569
SIRT6	0.103264	1.28401
PTPRB	0.103118	0.643194
FBXW11	0.103102	0.026729
NCAPD3	0.103064	0.0649365
MOB4	0.102957	1.5092
FURIN	0.10292	0.90187
SKP1	0.102663	0.851703
ITGB3	0.102615	0.188781
AFG2B	0.102574	0.784516
LONP1	0.102563	0.44136
TK2	0.102504	0.393759
MPHOSPH8	0.102481	2.4196
RAB13	0.102453	0.69966
ACP6	0.102397	0.470789
ARL2	0.102336	0.427746
CDC73	0.102285	0.507052
ELL	0.102166	0.84302
PRDX1	0.102089	0.316394
POP7	0.102004	1.29186
UBE2N	0.101863	0.515185
EPB41L1	0.101702	0.235124
DR1	0.101638	0.953486
PARD6B	0.101606	0.600178
MCUB	0.101478	1.20045
INTS5	0.101471	0.476882
GNG12	0.101387	0.343717
MDFIC	0.10116	0.609517
WWTR1	0.101067	0.23806
VMA21	0.101061	0.283375
ARHGAP23	0.100983	0.372306
SNAPIN	0.100854	0.169599
RBL2	0.100851	0.320597
PRF1	0.100746	0.801478
TOR2A	0.100618	0.292309
C1orf174	0.100576	0.310449
H1-4	0.100561	0.541116
SLC43A3	0.100528	0.174986
TCF4	0.100522	0.567513
IL17RA	0.100491	1.17806
STX18	0.100473	0.728216
STUB1	0.100467	0.421834
EML3	0.100321	0.461856
ADAM15	0.10029	1.12336
DVL2	0.100074	0.698626
PACC1	0.100016	0.396853
PTPRK	0.0999565	0.635181
FZD8	0.09994	0.114948
SRFBP1	0.0999374	0.501173
DPCD	0.0999241	0.290073
EIF3F	0.099865	0.335199
SERPINB8	0.0998236	2.81143
SART3	0.0998211	1.75196
PLXND1	0.0997683	0.420955
RAB4B	0.0995115	0.865255
RPL36AL	0.0995083	1.01773
NKIRAS2	0.0992953	0.688851
SPAG5	0.0989068	0.0460942
EPDR1	0.0987415	0.251698
NAA20	0.09869	0.943404
WDR36	0.0986621	0.488694
USP39	0.0986207	0.209652
NDUFAF4	0.0984853	0.504746
CTNNBL1	0.0983925	1.80201
C18orf32	0.0980625	0.354061
TAF2	0.0979741	0.306774
METTL3	0.0979468	1.10006
PITHD1	0.097875	0.943922
RHBDD1	0.0978737	0.442584
TSNAX	0.097683	1.23586
COPZ2	0.0976721	0.542179
IK	0.0976493	1.09392
STK11	0.0975641	0.466559
KIF3B	0.0975253	1.057
RBM33	0.0973911	1.08018
PSMA4	0.0973085	1.83015
DDX56	0.0972672	0.42842
MCTS1	0.0972436	0.758161
ETV6	0.0971343	0.383885
CHUK	0.0969194	1.19667
KIDINS220	0.0969086	0.74965
RHOBTB3	0.0968768	0.34876
LTBP3	0.0967801	0.107428
CTSO	0.0966466	0.113849
NUP107	0.0964597	0.378543
COX7A2	0.0963078	1.17227
TMED5	0.0962461	1.53102
COMMD7	0.0960967	0.547472
PANK2	0.0960375	0.520021
PRMT9	0.0960337	0.553463
PAPSS2	0.0959899	1.21353
FOXP1	0.0959447	0.912259
TRPS1	0.0958277	0.489187
PEX14	0.095801	0.473153
SGPP1	0.0957985	0.0332644
SNRPB2	0.0957375	1.22264
CMTM3	0.0953643	0.236726
C1GALT1C1	0.095218	0.648679
TERF2	0.095218	0.98161
DNTTIP1	0.0951742	1.5316
KLHDC10	0.0946287	0.293839
MNAT1	0.0946102	0.436248
SH3PXD2B	0.0945886	0.298339
DCBLD1	0.0944303	0.722235
PACSIN3	0.094312	0.656626
TMEM70	0.0943101	0.796157
VAMP5	0.0942841	0.327431
GAPDH	0.0942637	0.419382
GTF3C5	0.0942345	0.983781
ARCN1	0.094169	0.702269
MRPL10	0.0940698	0.956732
GPCPD1	0.0940208	0.266348
NECAP2	0.0940075	0.73104
BNC2	0.0939554	1.04116
AIP	0.0939484	0.812145
CEP131	0.0938969	0.212329
GDE1	0.093797	0.510232
TOMM40	0.0937831	0.325926
SYNGR2	0.0934607	2.29511
OGA	0.0933793	1.96563
HOMER3	0.0933507	0.617633
MEN1	0.0933247	0.405881
IPO11	0.0931918	0.448446
UBFD1	0.093188	1.17644
CREBBP	0.0931555	1.69299
BOLA3	0.0930061	0.680106
GLCE	0.092996	2.29697
BORCS5	0.0929871	1.40799
TJP2	0.0928345	0.387491
TUT1	0.0927391	0.182086
MT-ND4	0.0927194	0.232467
PHF21A	0.0927137	0.122101
DNPEP	0.092617	1.40117
GSK3A	0.0926119	0.424479
TMEM47	0.0925884	0.654414
TCF25	0.092563	1.30152
OGFOD1	0.0923208	0.116545
RPL6	0.0923208	1.18083
DOLPP1	0.092289	0.340239
AAAS	0.0921942	0.457914
NBEA	0.092186	0.16616
MEAK7	0.0921535	3.21687
GLIPR1	0.0920862	0.915224
TAF15	0.0919431	1.6905
NUDT1	0.0918369	0.284937
CMIP	0.0917905	0.429861
SLC2A8	0.0917721	0.0994532
POLR3GL	0.0917257	0.318894
RCHY1	0.0917155	0.529708
QSOX1	0.0917041	1.86373
CASP9	0.0916907	0.343703
DENND10	0.0915337	1.84596
RNF123	0.0913785	0.694308
ZMYND8	0.0913353	2.23166
IFT70A	0.0913296	0.56477
PCNP	0.091212	1.25704
TOP3A	0.0911916	0.119473
PDCD10	0.0911382	3.96694
MRPL46	0.0910651	1.79096
ATP1B1	0.0909964	0.82634
DPY19L1	0.0908775	0.593996
SLC52A2	0.0908744	0.618702
TRIM16	0.0907809	0.166382
MZT2B	0.0905717	0.343724
ANP32B	0.0905266	0.490568
KRCC1	0.0905259	0.359054
ALG11	0.0904344	0.587589
ATP8B1	0.0903149	0.475942
GCLM	0.0902869	0.585788
EDEM2	0.0902061	0.948235
XRCC6	0.0901457	1.68518
INTS6	0.0901318	0.692771
VPS4A	0.0900885	0.892801
PIAS2	0.0899792	0.359906
FCHO2	0.0898342	0.833583
ATP5MF	0.0897636	0.787996
EPN3	0.0897598	0.101486
DDX59	0.0896155	0.605681
NCOA3	0.0894464	0.432995
CMTM7	0.0889994	0.271766
HIRIP3	0.0889784	0.166211
GPATCH11	0.0889765	0.229106
RNF121	0.088843	0.591233
TIMM22	0.0887559	0.67456
EFHC1	0.08874	0.513996
RTCA	0.0886847	0.680059
MIF	0.0886567	0.399473
NR2C2	0.0886447	0.393491
RAI1	0.0885728	1.78605
ANKZF1	0.0884279	0.540133
GPS1	0.088426	1.4056
FOXC2	0.0883204	0.0929411
POLR2M	0.0883191	0.341685
DDX60L	0.0882912	0.447412
RFC4	0.0882289	0.191413
ARHGAP32	0.088143	0.112535
PDIA6	0.0879428	0.32093
FRA10AC1	0.0879078	0.348583
HIBCH	0.0878677	0.838435
RPRD1A	0.0877438	0.947265
LRRK1	0.0875804	0.524041
TFRC	0.0875727	0.0834705
KCTD21	0.0875327	0.221674
IMPACT	0.0875161	1.14354
TTC5	0.0875079	1.25601
BACE2	0.087169	0.658504
ATRN	0.0870851	0.830376
PLCD3	0.0870285	0.0949796
RGPD6	0.0869948	0.153012
WDR48	0.0868193	1.04006
NISCH	0.0867532	0.685654
TMEM128	0.0867093	1.51741
AMDHD2	0.0867081	0.544495
ADAM17	0.0866877	0.756892
SMG8	0.0866553	1.31928
MKRN1	0.0866528	0.586201
LYN	0.0866394	0.776092
CCM2	0.0865587	2.11696
PBX1	0.0865523	0.152918
MRPS23	0.0865345	0.984362
MGST2	0.0865332	0.839071
ANXA7	0.0864652	1.64088
RASSF8	0.0864175	0.810123
SEL1L	0.0863991	0.445603
PITPNB	0.0863711	1.05822
SPC25	0.086338	0.105003
LIX1L	0.0862192	0.472872
SNTB1	0.0862077	0.538788
TFB2M	0.0861549	0.332758
NECTIN2	0.086113	0.574361
CCDC169	0.0861098	0.177165
PSMB5	0.0859343	1.04163
TAMM41	0.085933	0.239334
NRF1	0.085893	0.364486
BNIP2	0.0858905	0.418244
SSRP1	0.0858707	0.390049
MGRN1	0.0857245	1.01409
EIF2B4	0.085509	1.39447
GYS1	0.0854842	0.612078
TMEM237	0.0853996	0.127528
TMEM109	0.0853634	0.903989
PIGU	0.0853341	0.459996
RAB6A	0.0852915	0.331875
HCFC2	0.0850811	0.360861
TAOK1	0.0849972	1.94828
PGGT1B	0.0848096	0.366825
TRBV15	0.0848014	0.297219
CAPZA1	0.0847994	1.72558
RBM22	0.0847797	2.31416
TNIP2	0.0845509	0.169154
GPN2	0.0845229	0.468674
NOC4L	0.0845114	0.297362
MCM7	0.084446	0.102499
FLYWCH2	0.0843697	0.381896
CERT1	0.0843455	1.52801
ARHGEF40	0.084343	0.578095
NDUFV3	0.0843283	0.333694
UBL7	0.0842889	0.330228
GAS2L1	0.0842292	0.104269
HAUS5	0.0841853	0.347933
SP110	0.0840937	0.663864
SH3PXD2A	0.0840664	0.691355
CCNH	0.0840333	0.322598
MAPK7	0.0840168	0.524428
CNOT7	0.0839647	1.02967
PSME2	0.0838922	0.598465
CIAO2A	0.0838839	0.407823
SLC2A1	0.0838203	0.32975
TANGO2	0.0838127	0.270664
ITPR1	0.0836747	0.293969
HAS1	0.0836137	0.453362
ATRAID	0.0836112	0.255913
MED24	0.0835641	0.63273
TPBG	0.0834262	0.239616
ARHGDIA	0.0833308	0.490092
PPP6C	0.0831451	0.114269
TMPO	0.0831254	0.294024
MAD2L1	0.0831089	0.0883661
VPS26C	0.0830752	0.764107
ZNF768	0.0830574	0.285062
RPS14	0.0830072	1.41737
ESF1	0.0829182	0.221015
NDUFA11	0.0828985	0.625163
PDE6D	0.0828718	1.15859
TAPT1	0.0827955	0.288889
ZC3HC1	0.082756	0.910293
FEN1	0.0827255	0.230495
HEXB	0.0827045	0.291283
ARMCX6	0.082695	0.309003
FGF2	0.0826658	0.216524
SNRPD2	0.0826251	1.39693
PTPN22	0.0825106	0.0618469
CD58	0.082503	0.244016
ITPKC	0.0824076	0.387716
BAZ1B	0.0823116	0.351527
GSR	0.0822989	0.497605
SNUPN	0.0819906	0.41876
MBP	0.0819283	0.381502
KRT81	0.0819219	0.218629
RAP2B	0.0817426	0.395092
CCDC115	0.0815099	0.581229
RBM15B	0.081344	0.936394
CRTC3	0.0813338	0.376968
RAB3D	0.0813109	0.313611
XPA	0.0812651	0.371935
COX5B	0.0812225	0.41945
ZNF318	0.0811914	2.7424
RFX5	0.0811507	0.922608
GMFB	0.0811125	0.925958
OLFML2A	0.0810579	0.123803
CHMP3	0.080869	1.9195
RIMOC1	0.0808029	0.626441
NIT1	0.0806274	0.435085
NUP155	0.0804666	1.22659
CYTH3	0.0804132	0.852128
CMAS	0.0804087	0.292893
MAGI1	0.0803642	0.0714349
BBS2	0.0803591	0.443773
DIP2A	0.0803534	0.226925
RFT1	0.0803013	0.610685
PLPBP	0.0802085	1.24508
PRPF38A	0.0801093	1.24145
TRIT1	0.080005	0.288127
THUMPD3	0.0799567	0.445512
NASP	0.0799465	0.388735
PLD3	0.0799173	0.109251
DSN1	0.079895	0.249357
ANKRD50	0.0798861	0.63488
KBTBD4	0.0798041	0.440889
C6orf52	0.0796884	0.43117
PRRC1	0.0796439	0.426088
MEPCE	0.0794442	0.640745
HPS3	0.079415	0.738607
SNRPGP15	0.0792408	0.61409
QTRT2	0.0792236	0.535963
NUBPL	0.0791899	0.219379
SMARCE1	0.0790965	0.442642
[truncated: 6,274 more rows]

## Sheet: Not Significant
Genes	Log2FC	LOG10 p-VALUE
FAM204A	4.67239	0.913987
COX8C	4.15604	0.954822
HPS6	3.75479	0.951182
FAM229B	3.7319	1.08551
PCTP	3.21303	0.8932
ZNF138	3.18304	0.832024
B4GALNT1	3.17966	1.07216
TPST1	2.98739	0.802504
COQ8A	2.9256	0.935935
TARBP2	2.79206	0.886444
UTY	2.74031	0.483408
SMIM32	2.72292	0.589143
MAF1	2.69493	0.943358
CNGA3	2.61847	0.584055
CREB3L2	2.589	1.02185
SIPA1	2.51343	0.894148
GUSBP11	2.51155	0.836834
OTUD5	2.4792	0.592906
IGLL5	2.45844	0.975179
PRELID3B	2.29973	0.372307
ZKSCAN8	2.22512	1.1963
TAPBPL	2.17078	0.555767
ADORA2B	2.16204	0.658237
OR4D2	2.15698	0.938121
LIN52	2.13491	1.09993
UNG	2.10856	0.477506
HJURP	2.08422	0.4382
ALDH5A1	2.06523	0.416766
INAFM2	2.04798	0.858026
RNF169	2.04148	0.421679
ACTMAP	2.03632	0.999536
CYP4Z1	2.03111	0.629777
USP42	2.02187	0.491537
NEK4	1.97154	0.349735
TAF10	1.91324	0.893609
KSR1	1.8977	0.487679
NDUFAF6	1.87006	0.568463
SAA1	1.83725	0.702512
PAPOLG	1.80326	0.393914
GKAP1	1.79523	0.952659
PMAIP1	1.79488	1.27118
GPR156	1.76797	0.755809
MRAS	1.74999	0.445818
KRTAP3-3	1.74308	0.424539
SH2B3	1.74263	0.318503
LY6G5B	1.73557	0.313859
MTMR8	1.72908	0.340974
FOXO1	1.691	0.696553
MENT	1.66769	0.780547
ZFYVE26	1.66199	0.388912
HINT3	1.64718	0.511337
TMEM167B	1.55613	0.450278
FAAP24	1.55532	0.856788
THAP12	1.53861	0.509348
PTK2B	1.53799	0.535839
PSTPIP2	1.52733	0.787053
OR1L3	1.49965	0.633539
LOC122539214	1.49763	0.535786
ZMYM1	1.48926	0.450859
KIF1A	1.48737	0.594343
ITIH4	1.48394	1.086
RAD51	1.4778	0.588783
FAM241A	1.47093	0.849995
SNX24	1.46234	0.97622
DENND1C	1.46108	0.497415
ZRANB3	1.45259	0.477167
C5orf46	1.44122	0.41796
TKTL1	1.42681	0.454288
ATXN1L	1.42499	1.16595
PPP1R3G	1.42359	0.670522
PPM1K	1.41014	0.337525
GNAZ	1.39605	0.404238
ARL14EPL	1.39181	0.456074
SLC26A6	1.3855	0.513404
MSANTD2	1.38004	0.480599
AADAC	1.37056	0.362472
ASB2	1.36693	0.915282
MRPS16	1.36634	0.509305
QRSL1	1.363	0.835034
GRIA1	1.34532	0.31811
PLEKHA8	1.34465	1.18207
PAX6	1.34067	0.79585
LMOD2	1.33147	0.723629
RNF139	1.32454	0.455755
CNOT3	1.31474	0.946939
SHISA4	1.30582	0.374087
TENM4	1.30463	0.372178
CLTCL1	1.29861	0.824604
SLC35B3	1.28241	0.356021
SPRY2	1.27234	0.945292
P2RY11	1.27129	0.281303
DUS1L	1.26677	0.290844
TP53INP2	1.26559	0.64287
ZSCAN32	1.25637	0.665996
MYORG	1.25373	0.675127
GTPBP8	1.24949	0.6712
TM2D1	1.2446	0.388601
KLHL6	1.24232	0.445535
VEGFA	1.24106	0.630715
NDUFAF5	1.23975	0.356041
PLAAT3	1.23911	1.18664
PDZRN3	1.22784	0.496374
ZNF182	1.21899	0.516904
MTIF3	1.21894	0.688792
TEX26	1.2143	0.732401
WASF1	1.19908	0.627259
BRF1	1.17597	0.692735
IL10RB	1.17409	0.645226
ATP11C	1.16965	0.911367
APOC3	1.15978	1.25912
PRR5L	1.1542	0.49781
DIPK2B	1.15062	0.943313
MED31	1.14485	0.314424
LINC00596	1.14071	0.935392
HBA2	1.13528	1.11502
RACGAP1	1.13047	0.352653
AGBL3	1.12935	0.25096
USP26	1.11885	0.286552
LINC02876	1.11849	0.556721
RAVER2	1.11174	0.724898
SELENOI	1.1107	0.776351
FOXD4	1.09714	0.976408
USP6NL	1.09547	0.223215
SLC8A1	1.0821	0.36938
CD300LD-AS1	1.07839	1.23547
UVSSA	1.07723	0.242219
NABP1	1.07598	1.02877
TIGD4	1.07221	0.982288
MAP3K20	1.07077	0.29056
ARHGAP39	1.06839	0.168244
PFN4	1.06444	0.283529
RNF167	1.0565	0.34519
RNF145	1.05438	0.882176
DELEC1	1.05302	1.00409
OR4E2	1.05197	0.241021
PPP2R5B	1.04969	0.321066
LYRM1	1.04537	0.399186
IRAK2	1.04364	0.404944
LCA5	1.04063	0.278457
KDM8	1.01838	0.753298
KLHL12	1.0145	0.432775
NLRP10	1.01329	0.283574
FAM106A;FAM106C	1.01273	0.537663
IPPK	1.00904	0.316516
AREL1	1.00548	0.776427
TRIM17	0.978019	0.44067
JUN	0.97524	2.02614
MT1L	0.96769	1.97141
PPP1R13B	0.964447	0.171689
CEBPZOS	0.957705	0.435077
F8A3	0.953282	0.937314
ZNF295-AS1	0.945871	1.81954
COL3A1	0.9426	2.4524
GRIN2C	0.94239	0.832803
TXNL4B	0.941673	0.376629
RIPPLY2	0.940591	0.567268
MARF1	0.937384	0.527409
WBP1L	0.931548	4.16956
CDC42EP2	0.929495	1.0659
TMEM14C	0.927458	1.84305
CEP57	0.926296	0.186598
ITM2B	0.925646	2.29395
NR2C1	0.920413	0.941472
CEMIP	0.917165	0.834059
PAG1	0.915197	0.818007
ZNF180	0.912984	0.982312
CINP	0.910697	0.424277
MIF4GD	0.910631	0.465613
TGIF1	0.909171	1.98692
NDFIP1	0.907642	0.519684
FZR1	0.903942	0.670181
NIPA2	0.903227	0.664352
STRBP	0.895245	0.10661
AURKB	0.895207	0.264451
CCDC71	0.89314	0.615417
TIMP2	0.882761	3.29372
CDK19	0.869748	0.603858
ZNF446	0.863556	0.586291
WDR76	0.861707	0.266721
VOPP1	0.855452	2.72652
RREB1	0.854776	0.742705
LRRC25	0.854591	2.68765
ZNF470	0.851027	0.312927
CDKN1A	0.850506	2.61924
HERPUD1	0.850452	4.25543
ZFYVE28	0.850203	0.727563
MARCHF7	0.850178	1.24885
CMTM4	0.848843	0.346328
PXMP4	0.848588	0.915098
OR2M3	0.846212	0.791435
COX7B2	0.844571	0.532276
BMPR1A	0.84373	0.512629
EPS15L1	0.842402	0.586484
CLSTN3	0.839314	1.75428
AMOTL2	0.833206	3.39836
ABL2	0.832137	4.64913
APOM	0.811872	1.02601
FGB	0.810532	1.85659
NCOA4	0.809233	2.27296
SPINT2	0.807624	0.671065
COL1A2	0.806854	2.5532
KANSL2	0.805516	0.756096
THNSL1	0.804337	0.63154
TRMT112	0.800645	2.71314
GRM5	0.797578	0.848054
NFIL3	0.797056	0.229524
HOXD4	0.794889	0.488135
SLC43A2	0.794437	2.44007
APLP2	0.792395	3.94459
TMEM267	0.791492	1.15895
IFT20	0.791462	1.67328
BCAS2	0.791234	0.478952
F2	0.789732	1.94015
ZCCHC18	0.789588	0.6017
HBB	0.786343	1.42642
IGKV1-8	0.785896	0.391184
ANGPT4	0.77877	1.28186
TEX19	0.775356	1.86322
LRRN4	0.774955	0.94662
SEMA3D	0.774713	0.669685
MSANTD3	0.770203	1.75965
MUC13	0.769356	2.43347
NDFIP2	0.76451	2.21794
PFDN5	0.763255	1.93619
SRGN	0.761851	2.78124
FGF20	0.755213	0.371207
TAOK3	0.754603	0.85608
POF1B	0.752008	0.958281
MEA1	0.750135	0.357394
KDM2B	0.749044	0.10882
DYNLL2	0.746506	2.37582
CEP76	0.745557	0.224189
RASSF10	0.744892	0.537974
SYTL4	0.744665	0.338417
ZNF479	0.743851	0.693487
B4GALT4	0.739223	0.530488
COLGALT2	0.738773	0.337154
POP4	0.737308	0.677801
MYO3B	0.736565	0.121818
DNER	0.731702	2.49209
MORF4L1	0.730239	0.687922
ADAMTS1	0.729968	1.4058
NBR1	0.722147	2.56279
SLC37A4	0.716893	0.468404
SESN2	0.71456	1.36014
HMGCS1	0.714537	1.01327
TRIM41	0.710294	0.436636
CCNT1	0.706369	0.425786
HRH2	0.705634	0.470971
SEMA4C	0.704312	0.519515
ZNF518B	0.703956	0.181915
CRYL1	0.701148	0.099398
FBXO40	0.699294	0.479141
CCSER1	0.696356	0.51874
PLAT	0.693926	0.848426
C1orf159	0.684652	0.51724
MRPL12	0.680833	3.54706
HPS4	0.679307	0.269883
FOSL2	0.677931	3.92857
COMMD8	0.674287	1.77157
JMJD4	0.673064	0.459682
PRR12	0.667339	1.02964
LCT	0.665668	0.551576
TMEM71	0.664081	0.805967
MTRF1L	0.662747	0.346931
SYT11	0.662272	1.87454
ID3	0.661006	1.60582
SH3BP5	0.660812	0.445894
LYSMD3	0.658649	0.496891
CRTC2	0.65732	0.372437
COL4A4	0.656291	0.525528
IFRD1	0.651849	1.87456
LGR4	0.650244	1.0313
DPP8	0.65005	0.253731
INHBC	0.647182	0.451212
FGG	0.64691	1.70915
EIF4EBP1	0.645208	1.96927
TNFRSF12A	0.644931	3.81591
GBP2	0.644834	0.31558
KRTAP10-6;KRTAP10-7	0.642585	0.588295
HNRNPCL1	0.642078	0.362144
CEBPB	0.641408	3.06003
APP	0.641404	3.35354
CTNNBIP1	0.640858	0.67529
LARS1	0.638313	0.683405
POSTN	0.638009	1.05793
FBXL17	0.634827	1.10878
PDP2	0.632753	0.252667
IBA57	0.629833	0.329038
PASK	0.627675	1.06397
CALCOCO1	0.627318	3.33576
SPOCK1	0.622843	1.86551
VTN	0.622357	1.40831
ZC3H12A	0.619536	1.81863
FGD1	0.613923	0.550336
WASHC2C	0.613173	0.620626
ABHD16B	0.612869	0.127505
SPINT4	0.612454	0.563186
F13A1	0.60756	1.24917
ANKRD26P1	0.606023	0.621145
RAD54L	0.604424	0.625254
PINK1	0.59853	0.306654
CEP350	0.596881	0.242956
POLI	0.59675	0.156304
SPRED2	0.596675	0.755866
MED22	0.59357	0.566692
DUSP6	0.592967	1.03227
ZNF8	0.584334	1.32847
PNPLA2	0.579774	2.60494
ZNF217	0.576768	1.74998
CHMP4C	0.576052	0.982817
PI4K2A	0.57573	0.458642
CBX6	0.573609	0.625739
RFXANK	0.571004	0.663023
RNF149	0.568602	1.56024
SIAH2	0.565706	0.45832
RPL39	0.563263	4.08727
ORC5	0.56319	0.815889
PNMA5	0.560213	1.23662
DCTN3	0.559566	3.20516
CLU	0.55945	1.10646
ZDBF2	0.558023	0.187444
DNAJB9	0.554237	1.11467
CRIM1	0.55381	2.02423
APOBEC3C	0.55369	0.478249
MARCHF2	0.552694	0.444714
MSX2	0.552422	0.380883
GPRASP2	0.552106	0.972525
SLC20A1	0.551172	2.33704
ARID5B	0.549557	2.7359
CDKN2B	0.548278	0.608267
APOD	0.547373	0.797998
FANCD2	0.546291	0.18026
TRBC2	0.54436	0.632713
TRIM54	0.5438	0.174837
PRMT2	0.543741	0.264559
PNMA1	0.543321	0.287868
KLHL21	0.541999	1.16968
POLG2	0.541616	0.264088
DIABLO	0.540903	1.83713
RNF227	0.538759	0.420201
TIFA	0.537848	1.4101
COL27A1	0.53784	0.500699
RPS29	0.537829	2.22915
ATP6V0C	0.537529	1.49913
CYP1B1	0.53573	0.78056
AMN1	0.532763	1.54171
QNG1	0.532328	0.229749
SAP30	0.531983	0.520893
CDKN2A	0.53099	1.90088
SGK2	0.528697	0.643614
TAX1BP1	0.524427	2.17855
SPZ1	0.523951	0.30044
ITIH3	0.518298	0.760516
CNN1	0.515784	0.354336
PSRC1	0.515483	0.261983
COQ2	0.513206	0.938026
ZBP1	0.512475	0.220913
PSAP	0.511994	1.768
FZD7	0.511144	1.6698
SAMD4A	0.510822	0.536045
HSPA1A;HSPA1B	0.508456	1.90101
MORF4L2	0.506308	1.48787
FOXO3	0.506285	2.46969
TEAD4	0.50425	0.272774
SERINC1	0.503419	4.25588
SIX5	0.500411	1.84561
STC1	0.499654	2.98244
FLVCR1	0.497264	1.44054
TRA2B	0.496806	3.45737
CASS4	0.494357	0.14726
SQSTM1	0.493868	1.72346
BRMS1	0.493661	0.606616
SMCO1	0.492833	0.374231
FAM210B	0.487242	0.57287
ZNF24	0.486898	1.69141
MCM8	0.486293	0.445065
PTPRZ1	0.483219	0.0630024
RAC1	0.483126	2.41808
UBE2H	0.481126	0.534681
DENND6A	0.480084	0.689954
UNC93B1	0.477514	1.62627
HSPA1L	0.472059	1.60801
LRIF1	0.471628	1.11425
LRP10	0.470587	2.51042
PCOTH	0.46888	1.15119
ADAMTS15	0.466919	0.461387
CCNL1	0.466136	2.25906
C4B_2	0.464088	0.934839
MMADHC	0.464088	1.0759
STYXL2	0.462517	0.218203
C3	0.461735	1.21532
IL13RA1	0.461317	1.05796
MPLKIP	0.461222	1.92987
FOSL1	0.460908	0.713486
NDUFAF8	0.456813	1.4243
COG2	0.456685	0.843246
NLRX1	0.456657	0.626547
CD320	0.454637	2.03352
EHBP1L1	0.451872	0.772103
SNTG1	0.451714	0.537981
PLAU	0.451258	3.32702
SLC27A1	0.451209	0.225444
NEXMIF	0.449774	0.907916
RNFT1	0.447374	0.734819
ETV3	0.446945	1.19954
AGPAT3	0.444495	2.12738
ICAM1	0.444325	1.96414
CKS2	0.439644	0.342893
PDX1	0.439471	0.218204
CGAS	0.43431	0.697727
PDZD11	0.434273	2.19921
ZNF654	0.432913	0.420142
TTC17	0.431135	0.51761
SLC39A9	0.431095	0.160254
SNX19	0.430833	0.280707
ZNF460	0.430578	1.18918
PCGF5	0.430148	1.34478
MMP2	0.429789	2.4496
BHLHE41	0.429431	0.417528
TTYH3	0.422003	1.19193
IQCJ	0.420772	0.305245
GADD45B	0.420643	0.179055
DENND2A	0.4198	0.255323
ZFP36L2	0.419254	2.42236
MYL12A;MYL12B	0.417999	2.26592
PZP	0.417555	0.501484
SEC61G	0.417264	1.65621
GUSB	0.416812	0.606806
TRMT10A	0.415482	1.39763
HAUS7	0.413899	0.751316
ZC3H12C	0.413797	0.296644
UBA52	0.411985	0.616853
TREML2	0.411599	0.185444
ITGB8	0.409728	0.410938
MGAT5	0.408566	0.685499
KRT76	0.408338	0.163661
SLC49A4	0.407935	1.4339
TMEM51	0.407522	0.65996
TSPAN3	0.407087	1.03012
SCAF8	0.406173	0.924646
BMPR2	0.405698	2.35634
ADAM12	0.405488	0.657625
COL6A1	0.405154	1.46735
CA5BP1	0.404576	0.852601
CENPA	0.404508	0.660079
SULT1A2	0.404175	0.371249
CPEB3	0.403226	0.894784
POMP	0.401794	1.38496
EIF2AK3	0.401619	2.03803
TIGD7	0.400806	0.409811
NAGLU	0.400176	0.468457
ITPRIP	0.399517	3.63385
BCAP29	0.396772	1.47841
BRDT	0.394709	0.178825
GSTT1	0.394292	2.45931
KAT14	0.393989	1.69173
JAM2	0.393342	2.3206
TMEM200A	0.39306	0.800375
CEP112	0.392043	0.557666
PRDM1	0.389988	0.416755
VEGFC	0.388077	1.31337
GAP43	0.386935	1.09987
PFKFB3	0.386465	1.31138
KGD4	0.386462	2.35044
SH3BP2	0.385031	0.204759
MRTO4	0.38489	1.71835
TBC1D1	0.384709	0.310757
TRIM37	0.381077	0.0821488
MAP4K2	0.379421	0.743682
HSPA6	0.375862	1.082
SLC25A36	0.374439	1.44901
MFGE8	0.372835	1.45225
RPP25	0.371232	0.386827
ING4	0.371044	0.631632
SPRR3	0.369399	0.771396
OSCP1	0.368825	0.682681
NOL4L	0.367347	1.08348
SERINC3	0.366999	2.26485
ARHGAP24	0.36699	1.33642
SOD2	0.365767	2.61116
WWP2	0.364931	2.3971
ZNF639	0.36304	0.346906
TNFRSF10B	0.362624	3.1582
CELSR2	0.362225	1.09257
CIB1	0.361739	1.73439
DDX47	0.359709	2.01003
LCOR	0.359653	0.810757
SASH1	0.359463	2.0216
CCDC71L	0.357937	1.05058
NDUFA1	0.357323	1.54098
CHIC2	0.355978	0.499241
CHST11	0.355709	1.10562
INPP5A	0.353987	0.340045
OPA3	0.352496	0.551379
RTL8B	0.351659	2.40122
LRP12	0.351388	0.919617
LOX	0.351124	1.25086
ARL4D	0.350619	0.526221
GPNMB	0.349863	1.65429
IGFBP6	0.349325	1.02254
GPATCH8	0.34902	0.583917
ZNF444	0.348018	0.329418
MANEAL	0.347703	0.640801
COX14	0.347158	1.12691
TMEM234	0.346471	0.863534
LOC128071544	0.345968	1.50925
KDM3A	0.342274	0.692652
PCDHGC3	0.342127	3.53136
POC5	0.341129	0.717115
A2M	0.339722	0.399902
APPBP2	0.339649	0.363352
STOML3	0.338193	2.38373
ATP5IF1	0.337379	3.32105
HABP2	0.337264	0.719793
NSMCE3	0.337079	1.4229
HEXIM2	0.3359	1.24186
USP20	0.334809	0.272482
SSBP3	0.334758	0.871702
TNFRSF10D	0.333492	1.83704
CASTOR1	0.333336	0.518999
SERPINF1	0.33289	0.501941
CCDC59	0.332443	1.0549
FEM1B	0.331388	1.73577
ODC1	0.329941	0.635343
PANX1	0.329485	0.948214
YEATS4	0.329437	1.77456
LAGE3	0.329187	1.57872
SDC4	0.328971	2.28107
MLF2	0.328965	2.11371
ARFGEF3	0.328307	0.0846465
PRKAA2	0.328084	3.04275
ATP6V0D1	0.327749	2.83702
SRXN1	0.327461	1.31694
SNHG12	0.326087	0.210788
SEMA3C	0.32567	0.672019
ANTXR1	0.324946	1.07554
VSIR	0.324916	0.708382
IFITM3	0.324579	2.3955
ADI1	0.323756	0.756482
CDC42EP4	0.323306	0.801937
SIDT2	0.323096	0.0757386
TMEM35B	0.322545	0.21233
YPEL5	0.321688	3.20672
PHF8	0.321251	1.3658
COA1	0.320134	2.25996
HERPUD2	0.32007	1.28529
AGTPBP1	0.319756	0.460215
CHD6	0.319452	2.14137
CPE	0.319284	2.69907
HDAC4	0.318874	3.95507
GPS2	0.318336	1.94237
MTPN	0.318303	1.02119
RGP1	0.318163	0.717161
TSPYL1	0.316769	0.789548
SPPL2A	0.315896	2.481
ME1	0.315821	0.565633
DGKE	0.31528	0.1381
PTCD1	0.314898	0.516316
GSTM4	0.314687	0.409354
TGFBR2	0.314468	1.2564
LAMA1	0.313868	0.808399
AGBL4	0.313539	0.11625
CENPV	0.312035	1.38157
ZEB2	0.310839	1.30302
ZNF644	0.310251	0.848697
CC2D2A	0.309639	0.743942
UPRT	0.308205	1.1307
AP4S1	0.308157	0.256126
C1orf105	0.308096	1.13934
TMEM248	0.307632	0.803561
MRGBP	0.307384	1.22204
ANTXR2	0.306988	3.55899
ITIH2	0.306562	0.939934
RTL8A	0.305902	2.84293
TVP23B	0.305595	1.2096
PCDHA1	0.305257	0.387482
MRPL58	0.304774	0.471515
DDR1	0.304519	0.714886
TIMP1	0.304224	0.78283
ZNF579	0.304138	2.02824
PROS1	0.302447	0.18347
TNFRSF1A	0.302081	0.866369
ERH	0.301573	1.49539
SLC38A2	0.301469	0.792972
FAU	0.300224	1.85954
FCGRT	0.30014	0.749825
RARA	0.299855	0.433701
OSTC	0.29858	1.06661
PRRT3	0.297807	0.975148
MDK	0.297648	0.735127
BARD1	0.297301	0.0872485
UGCG	0.297198	0.773939
TULP4	0.29704	0.210118
SPRED3	0.296815	0.366974
DAAM1	0.296144	0.827352
BRPF1	0.296137	1.07206
FAM234B	0.296064	0.608251
ZDHHC8	0.295713	0.822588
SECISBP2L	0.295554	0.648812
PHLDA1	0.295502	2.60915
NCAPG	0.295149	0.438769
HPGD	0.294571	0.207515
COPZ1	0.294038	1.36476
PFDN1	0.293903	1.08922
F3	0.293432	0.989969
XYLB	0.290888	0.0650109
GSTCD	0.290396	1.29042
FNBP4	0.289797	0.316135
BNIP1	0.289361	0.746037
MGST1	0.289307	1.90671
DCD	0.288568	0.569144
ITGA5	0.288285	2.17652
CDK2AP2	0.288197	1.97596
NCOA2	0.28784	0.634917
GPRC5C	0.28774	0.45785
IGFBP3	0.287737	1.10297
TXNRD3	0.287129	0.133574
PGK2	0.286699	1.32324
RIT1	0.28572	0.27955
SMCR8	0.284306	0.354404
DLG4	0.283812	0.866832
ZNF160	0.28374	0.18745
KLHL25	0.283284	0.895236
SPINK5	0.282677	0.0972457
GLP2R	0.282246	0.374322
TESK1	0.28183	0.200839
GRN	0.281477	0.876399
GOLT1B	0.281046	0.911791
ACTB	0.281031	2.87656
F11	0.280753	0.917111
CHTF8	0.28072	0.791721
LURAP1L	0.280435	0.328046
TXNIP	0.280345	1.52858
PLTP	0.279966	0.94724
SUPT4H1	0.27926	2.31616
IRS2	0.279182	0.666597
DHRS13	0.278932	1.42865
CAPN11	0.277421	0.0647725
SGSM3	0.277291	0.331006
RPL21	0.277026	0.919318
SELENOM	0.276131	0.423765
SLC1A4	0.275572	0.571005
CEP41	0.274009	0.390877
SRD5A3	0.273944	0.699041
REEP2	0.273318	0.514256
FTSJ1	0.272091	1.10216
IKBKE	0.271544	0.533428
CHEK2	0.271091	0.151916
KIF23	0.269435	0.140822
NTHL1	0.269166	2.53151
LRP8	0.267888	0.443994
H2AZ1;H2AZ2	0.267782	1.70685
WIPI1	0.265852	1.78223
MMP14	0.265525	2.52238
SPC24	0.265395	0.34529
CACTIN	0.265317	2.50738
LITAF	0.265171	1.20249
NDUFAB1	0.265128	4.19566
MFSD14A	0.265043	0.557364
CD46	0.265017	2.29868
PUS7L	0.264818	0.951696
DPY30	0.264169	0.569452
MED13L	0.263859	0.576318
ZNF511	0.26351	1.16913
ABCD4	0.263506	1.32116
TNFAIP8	0.26314	0.677215
LTBR	0.263089	0.891599
COPE	0.262637	1.58941
CD274	0.262429	0.779753
IFIT2	0.261943	1.0604
ANAPC16	0.26177	0.482602
AIRIM	0.261126	0.66466
ABCC3	0.260623	0.138553
ENOSF1	0.260145	0.943946
COA4	0.259979	0.688716
ZMIZ1	0.259733	1.83077
KIF13A	0.259623	1.04688
TONSL	0.259039	0.124392
PMM2	0.25838	0.750679
ANKS1A	0.257893	0.763309
MCC	0.257554	0.654401
GZF1	0.256732	0.692643
LENG8	0.256175	1.79316
IGHV5-10-1	0.25455	0.619479
CNIH3	0.252598	0.652039
RRM1	0.252511	0.386867
WDR54	0.252138	0.221592
TLE5	0.2512	1.88865
CMKLR1	0.251185	0.575588
BACE1	0.250522	0.788058
PXDC1	0.249632	1.39298
CEP128	0.249544	0.150401
TFAP2E	0.24825	0.327287
SNRPF	0.247816	1.27881
C12orf57	0.247684	0.47394
CHST7	0.246564	1.44583
UMAD1	0.246159	0.75856
PRPF38B	0.245626	0.959497
PCDHGB7	0.245558	0.813897
DDX25	0.245075	0.805797
NCOA6	0.244643	0.88813
TADA2B	0.244383	1.22463
RAB12	0.24419	2.78116
SYT1	0.243984	1.70257
HRK	0.242875	1.50296
EMG1	0.242638	0.497189
YIPF1	0.242483	1.37365
TIMM8B	0.2424	0.51074
OGFOD3	0.242263	0.797084
GGT2P	0.242246	0.183008
SEZ6L2	0.242207	0.794926
ZNF503	0.242133	0.248446
NR2E1	0.242108	0.133231
KCTD10	0.241917	1.94761
LARP6	0.241777	1.48558
NRP2	0.241666	1.95047
U2AF1	0.241455	3.03571
HINT2	0.241182	2.43204
TINF2	0.240506	0.191065
SCAF4	0.240231	2.11079
BLOC1S1	0.240195	2.0868
ARRB1	0.239192	0.940595
TGFB2	0.239126	0.711151
WASHC3	0.23907	0.922191
UCK2	0.237514	0.390456
RBM15	0.237508	0.0439624
TMEM164	0.236872	1.39813
SMARCD1	0.236567	1.04916
CLN6	0.236553	2.09206
RBBP5	0.236457	1.14146
SLC25A26	0.236427	0.367633
ELOVL5	0.236224	0.396424
MED26	0.23598	0.741517
CNOT2	0.23539	2.97778
TRAF1	0.235329	1.87511
RNF138	0.234936	0.150329
ADAM8	0.234825	0.419049
HRH1	0.234761	0.724008
PSMD14	0.234556	1.87035
APOO	0.233866	2.29685
TAP1	0.233795	2.41862
KIAA0930	0.233775	1.58441
GJA1	0.233407	2.11557
TTC39B	0.233193	0.172612
MT1F	0.232642	0.283769
HMGA2	0.23243	2.17424
AIG1	0.232129	0.314724
TMEM132A	0.231999	1.21617
PLPP3	0.230878	0.938076
ABT1	0.230793	2.38846
STRIP2	0.23038	0.447432
DSTYK	0.229986	1.19505
EPHB4	0.229877	0.814903
NFATC2IP	0.229436	0.189079
SERPINC1	0.229221	1.40862
PHLDA2	0.22838	2.89204
ANGPTL4	0.227719	0.497573
VWDE	0.227484	0.0469002
JAG2	0.226639	0.322123
IRAK3	0.226561	1.16559
HES1	0.226225	0.176414
BLOC1S4	0.226118	2.25309
SDCBP	0.226049	0.709602
IL6ST	0.225695	2.20017
CNNM4	0.224849	0.293982
IFT43	0.224361	1.16719
STX6	0.2241	1.14781
ZBTB21	0.224081	1.02059
STX1A	0.223684	0.586736
DCP1A	0.223448	2.55704
CDK11A	0.223197	0.929232
FGFR1OP2	0.222881	1.28287
KCTD7	0.222534	0.492216
GATB	0.220481	0.867355
SLC39A1	0.220474	1.09823
JMJD1C	0.219893	0.902636
TRMT61B	0.219866	0.486511
CYCS	0.219449	3.18171
HMGXB3	0.219224	0.0546814
KCTD18	0.218194	0.306334
MICA	0.218111	1.08932
TNFAIP2	0.217443	1.38758
UPF3A	0.217184	1.37337
SOS2	0.217133	0.378868
SEMA3B	0.217047	1.03419
BTBD1	0.216855	1.56866
DYNC2LI1	0.216696	0.151326
YAF2	0.216626	1.86707
CBR3	0.216311	1.12408
FAT1	0.215645	1.82408
LMTK2	0.21501	0.290997
TUFT1	0.214942	1.11974
MGME1	0.214897	0.305439
INSR	0.214477	0.922726
ABCA1	0.213887	0.391154
CIR1	0.213224	0.865871
PSEN2	0.2129	0.428608
ITFG1	0.212694	0.699351
LDLR	0.210777	0.727269
EXOSC1	0.210189	1.4003
DHX58	0.210008	0.165306
LRRFIP2	0.210003	1.92719
FAM53C	0.209897	0.487174
SAC3D1	0.209873	0.181397
ADAM9	0.209815	3.60491
DDR2	0.209746	0.909462
DCTPP1	0.208938	1.13409
DSCC1	0.208834	0.505337
HMOX1	0.208604	0.77746
SYPL1	0.20808	0.795156
ADAM19	0.207408	0.576944
DGCR2	0.207284	0.492459
TFPI2	0.207244	0.317557
CAB39L	0.206949	0.228851
SCML2	0.206797	0.381756
OSMR	0.206633	0.67528
TMEM69	0.20648	1.41266
KLHL36	0.206402	0.629136
GPR143	0.205971	0.822718
ANKRD39	0.205466	0.316069
RNF115	0.205434	0.670056
PTMA	0.205372	2.57141
SREK1	0.205256	0.235263
CYSRT1	0.204974	0.159325
LOXL3	0.204752	0.955825
GLTP	0.204648	2.35181
PPP3CC	0.204648	1.4563
HACE1	0.203805	0.347213
YRDC	0.20377	0.629398
AATF	0.203575	0.659255
METTL21A	0.203269	1.53196
PPP1R10	0.202569	2.03682
C9	0.202426	0.209915
RAB21	0.20238	2.05935
COL5A2	0.202343	0.518762
TBC1D10A	0.202045	0.883208
ZFAND5	0.201992	0.942184
POFUT1	0.201931	0.957526
HMG20A	0.201721	0.380069
HSD17B11	0.201586	0.567763
TNFAIP1	0.20132	1.02451
SCD5	0.201295	0.881884
TAF8	0.201288	0.648961
CALCOCO2	0.201124	0.715023
POLR1H	0.200723	0.278213
ELOF1	0.200315	0.851228
SLC39A11	0.200274	0.711011
ALAD	0.200274	0.705189
TXNDC15	0.200128	1.10365
SCYL3	0.200069	1.23088
CPZ	0.199795	0.230263
EVL	0.199484	0.721496
ZC3H13	0.198985	1.76849
FBXL12	0.198795	0.554211
TUBB3	0.198636	1.71669
PIGX	0.197608	0.441445
H2BC26	0.197444	1.85979
HECW2	0.197267	1.20745
CRYAB	0.197076	1.12908
SMIM12	0.196985	1.41282
MEIS3P1	0.196843	0.620252
SSBP4	0.196611	1.21064
ING1	0.196068	2.17825
TCTN3	0.195553	1.1642
UXT	0.194714	0.739771
RAB29	0.194581	1.29608
TYW5	0.194564	0.117208
UBR3	0.194523	0.981237
FBLN2	0.194272	0.593922
POGK	0.194234	0.811264
FAM234A	0.193893	0.53194
UBE2S	0.193452	0.136495
SNX21	0.193386	0.588543
DDAH2	0.193007	0.912166
TOMM22	0.192746	0.561393
PGAM1	0.192424	1.26048
ERLIN1	0.192121	0.464027
SERPINE1	0.192118	0.63234
STK19	0.192111	0.265531
MT2A	0.192012	0.623961
TLK2	0.191987	0.609105
ZNF736	0.191641	0.358872
EVA1A	0.191448	0.444951
POLR2L	0.190633	0.923542
CDK5RAP1	0.190303	1.46001
ARSJ	0.19007	0.286581
NPEPPS	0.189794	0.796248
SNX11	0.189683	0.087076
MPZL1	0.18936	1.43043
ZBTB7A	0.189295	0.568889
ATP5MG	0.18897	2.4894
JAK3	0.188482	0.948271
SLC29A1	0.188071	1.5351
ATXN1	0.188071	0.923275
ZNF629	0.187548	4.35888
SAMD8	0.187336	0.660216
CENPS	0.187211	0.492627
KDM2A	0.186762	1.2462
NTN4	0.186213	1.68666
OS9	0.185777	0.826121
IBTK	0.185329	1.67736
DENND1A	0.184794	0.869852
NUDT4	0.184757	0.917452
TXNDC5	0.184504	0.503868
SIAH1	0.184357	0.476528
OBSL1	0.184219	1.2946
TAGLN3	0.184052	0.23974
ITGA6	0.183905	0.30704
NOP10	0.183865	2.42975
LRIG1	0.183723	0.730125
DUSP23	0.183636	1.72346
KCNG4	0.183379	0.564786
BAK1	0.183216	0.529952
RGL2	0.183216	1.76642
NFYA	0.183119	1.32892
TMEM185B	0.182856	0.69577
PMF1	0.182535	0.54177
GLOD4	0.182423	1.10185
NAPG	0.182268	0.297215
NDOR1	0.182257	0.635534
COX7C	0.182178	1.0373
IL1RAP	0.182119	1.47216
PHF10	0.181862	1.00147
FNTB	0.181833	1.17455
LIN7C	0.181668	1.114
ATXN3	0.181515	1.47111
RPP25L	0.181154	1.42407
MT-CO1	0.181133	0.522732
BEX1	0.181018	0.275901
CLCN6	0.180876	0.440216
ZC2HC1A	0.180738	1.19406
SLCO3A1	0.180503	1.24762
ASPH	0.18046	0.369064
AMBRA1	0.179801	0.473414
ZNHIT2	0.179439	0.621661
KCTD4	0.179333	0.695212
GLIPR2	0.179262	0.64566
UBE2I	0.179161	2.18215
NFIC	0.179063	1.74024
NPEPL1	0.178902	0.629166
RASSF7	0.17839	0.174851
AFP	0.178385	0.125547
UQCC4	0.178031	0.155314
IGHV3OR16-17	0.177956	0.192241
RAD51D	0.177904	0.263758
CXXC1	0.177675	1.32541
SFR1	0.17766	0.265284
HSPB8	0.177407	2.00636
PPM1F	0.177334	2.18909
CUTC	0.177292	0.98669
GPRIN1	0.177233	0.998144
CCDC91	0.176973	0.385836
TGFBR1	0.176394	0.846392
NDUFB6	0.176281	0.718616
PRSS23	0.17598	0.689275
RBM45	0.175948	1.48873
LRRC8E	0.175838	0.470807
FOXK1	0.175749	2.10854
DKK1	0.175708	0.390235
TRIM44	0.1757	0.168916
HMSD	0.17568	0.446538
DCAF5	0.175663	1.80691
MEF2A	0.175452	0.966554
CXADR	0.175155	0.223555
PYGO2	0.174653	1.6618
TRAF6	0.1746	0.624613
ATG7	0.17448	0.496333
PTTG1IP	0.174442	1.37695
MTX2	0.174209	2.08141
CCDC117	0.173777	1.10304
GRHPR	0.173333	1.88245
FZD1	0.173333	0.61475
EDIL3	0.173083	1.04745
ARHGAP31	0.172901	0.841759
ANOS1	0.172867	0.671881
TSC22D1	0.17277	0.340168
MBTPS2	0.172763	1.71667
STRADA	0.172406	1.82225
ILRUN	0.172309	0.316419
IRAK1	0.171966	1.30687
FSTL3	0.17158	0.725244
SLC5A1	0.171501	0.10574
STARD9	0.171144	0.723233
TMEM106B	0.171087	1.43825
ATAD2	0.170977	0.143737
IFNGR1	0.170851	0.526506
MEAF6	0.17074	1.20279
IFT25	0.170533	1.0451
SNRPE	0.170503	1.53516
TMEM50B	0.17049	1.18452
TM7SF3	0.170343	0.642814
LRCH2	0.170039	0.281193
SLC2A10	0.169554	0.260233
VGLL4	0.16946	0.705905
IGKJ4	0.169456	0.215334
WDR47	0.169209	1.34202
RABGAP1	0.169044	0.220083
ICMT	0.168812	1.00383
ABCG2	0.168742	0.38991
FAM193B	0.168342	0.419457
PAFAH1B2	0.168264	0.894899
CEP78	0.167963	0.209857
ADGRL4	0.167946	1.50233
POMT1	0.167787	0.804461
CENPC	0.167728	2.55287
ASB1	0.167714	0.62917
PDGFRB	0.167665	0.438785
ZNF581	0.166876	0.111793
CIT	0.166663	0.0793049
ELP5	0.166527	0.517139
SIX3	0.166407	1.75092
JUND	0.166279	0.697046
MICB	0.165745	0.701535
SV2A	0.165744	1.18863
CYSTM1	0.165422	1.64972
SMPD2	0.165067	0.386299
MTFR1	0.165012	0.698167
UAP1L1	0.164975	0.506083
LMAN1L	0.164817	0.0499179
RRP15	0.164373	1.29219
PHC2	0.164139	1.744
COASY	0.164095	0.954623
BACH1	0.164079	1.16054
BAGE3	0.163964	0.116288
FAM20C	0.163582	0.507745
SPHK1	0.16352	0.319025
CHPF	0.163415	0.806349
NRDE2	0.163343	0.550973
AGO3	0.163142	0.394092
UQCRB	0.163081	2.57019
ACVR1	0.162923	2.22715
AGAP3	0.162821	1.44748
MEF2C	0.162598	1.9709
DNAL4	0.161845	0.344427
NSMCE1	0.16173	1.12538
WDR89	0.161496	0.521005
RPL34	0.161487	1.63008
MTHFSD	0.161063	0.464468
RYBP	0.161054	0.703716
SGSH	0.160963	0.449107
DDX19B	0.160767	0.32499
ORMDL3	0.160707	0.721652
WASHC1	0.160545	0.696662
TRAPPC3	0.16037	1.66485
TSPAN9	0.160307	0.379953
NUFIP1	0.160191	0.323271
PEX10	0.160142	0.36523
GLRX	0.159946	0.594477
EIF4EBP2	0.159901	0.5371
HABP4	0.159662	1.72858
WDHD1	0.159636	0.161561
PLAUR	0.159599	1.73181
CIZ1	0.159419	0.881112
TTC33	0.159228	0.709827
SURF2	0.158925	0.552945
COA3	0.158274	0.732943
TFAP2C	0.158239	0.232857
TM2D3	0.158084	0.995465
MIDEAS	0.157914	1.71761
MRPS18C	0.157801	1.65765
ARK2N	0.157604	2.79086
C7orf25	0.157571	1.02354
CDR1	0.157506	0.0738773
SRSF4	0.157245	0.339493
CLN8	0.157132	0.400977
GGNBP2	0.15712	0.380803
TAGLN2	0.156973	1.15209
RABEP2	0.156877	0.235547
NRAS	0.156825	0.975417
COX6C	0.156814	1.38134
ZNF574	0.156635	1.16108
FGGY	0.156576	0.0963418
PARP15	0.156414	0.0622529
ANPEP	0.156279	1.12751
NCAPH	0.156207	0.420549
MAZ	0.156169	0.599988
STEEP1	0.156076	0.541115
S100PBP	0.156019	0.448983
LEPROTL1	0.155959	0.508887
PHKG2	0.155898	1.18522
FMNL1	0.155828	0.929379
ATG101	0.15559	0.74883
DHX32	0.155573	0.83527
KLHL10	0.155551	0.0992344
R3HDM4	0.155376	0.61351
PIK3C3	0.155305	0.0930639
GMEB1	0.155075	1.28547
DTWD1	0.154789	0.430395
TSPAN4	0.154623	2.18189
LAMTOR5	0.154622	0.492595
GYG1	0.154499	2.36579
MTFP1	0.154438	0.927684
USP35	0.154261	0.307602
SFT2D2	0.153842	0.703378
DUSP11	0.153428	0.358982
EEF1AKMT2	0.153411	2.0917
RAB11FIP1	0.153275	0.693271
THEM4	0.153235	0.366574
DUS2	0.152681	0.868053
STK38L	0.152426	0.545449
TGS1	0.152363	0.59023
MAP1LC3B	0.152355	0.685146
UBL3	0.152328	0.991618
NEDD4L	0.152245	0.641563
PTPRF	0.152101	0.394755
GSTM3	0.152098	0.873861
ZBTB9	0.152051	0.749731
RECQL5	0.15199	0.280455
APBB1IP	0.151942	0.725779
FILIP1L	0.151931	0.414627
GABARAPL2	0.151661	1.19926
NDUFAF7	0.151615	1.30652
MSMO1	0.151585	0.376416
BORCS7	0.151273	0.483953
LRCH1	0.151268	0.204732
RAB11A	0.151168	0.442472
EID1	0.151137	0.299485
EED	0.151087	0.346564
ARRDC1	0.150978	0.376635
TBC1D17	0.15097	0.49152
RTRAF	0.150854	2.36835
MITD1	0.150482	0.768478
ABCB6	0.150226	0.258619
LEPROT	0.150209	0.383842
PHF20L1	0.149818	0.327853
BCAR3	0.149796	0.24213
ABHD10	0.14975	0.494506
BTF3	0.149715	0.85455
SIRT1	0.149683	1.35427
BRAP	0.149455	1.23507
PIGM	0.148918	0.796917
PSMG4	0.148781	0.628821
WTAP	0.14872	1.24002
CLSTN1	0.148668	0.654971
ECHS1	0.148554	1.70277
PMS2CL	0.148439	0.268345
KIF14	0.148301	0.191826
MAGOH	0.148237	1.31009
NME6	0.147898	0.935127
ABHD4	0.147863	1.362
UQCRQ	0.147795	1.22022
TIMM50	0.147621	0.993859
IFT88	0.147523	0.75266
FBN2	0.147502	0.777163
ACTR8	0.147421	0.445503
OGFRL1	0.147303	0.518111
PPIL1	0.147237	0.708524
TMX4	0.147018	0.249152
TRPM4	0.14666	0.315414
PHTF2	0.146597	0.465466
PITPNM2	0.145458	0.286691
PORCN	0.145391	0.278814
POLD2	0.144945	0.218405
PREP	0.144935	0.0714337
DNAJC11	0.144871	1.41805
MRPS10	0.144854	0.899909
HSPBP1	0.144738	1.00305
ALK	0.144629	0.738757
TRAPPC1	0.144485	1.83987
VAMP3	0.144468	1.9985
ICE2	0.14436	0.277838
LRRC20	0.144052	0.577023
AP1G2	0.14382	0.229701
PHACTR2	0.143636	0.94552
CCPG1	0.143455	0.343116
CYB5B	0.143206	0.848713
SGTA	0.143201	1.65337
ATG4A	0.143124	0.521234
CDK13	0.142433	1.31153
PNISR	0.142356	0.830823
FASTK	0.142278	0.574647
CCDC167	0.142175	1.6842
GMEB2	0.142003	0.522605
ACTR2	0.141876	0.894469
ATP5PO	0.141444	1.61917
DISP3	0.141401	0.201986
PSPH	0.141291	0.308023
SLC3A2	0.141288	1.1086
KBTBD6	0.141176	0.348821
USP28	0.141112	0.304625
AKR1C3	0.141064	0.136554
SAR1B	0.140964	0.589769
TTL	0.140961	0.75339
FDFT1	0.140951	0.17272
ACOX1	0.14084	0.831271
TTC12	0.140312	0.226542
THTPA	0.140304	1.91101
PDLIM4	0.140209	0.771629
GPR180	0.140125	1.32102
ZCCHC24	0.139964	0.29285
ZNRF2	0.139801	0.392633
CCBE1	0.139582	0.220847
PPTC7	0.139524	0.659628
TRAPPC9	0.139461	1.2074
NUP42	0.139423	0.979535
INTS14	0.139362	1.30037
XRCC5	0.13911	1.80577
MT-ND5	0.139058	1.0578
LRRC17	0.139043	0.365405
COMTD1	0.139011	1.41803
EVI2B	0.138985	0.826882
SRPX	0.138882	0.653991
DNAJB1	0.13888	1.09289
LMAN2	0.138418	0.583491
TSPAN13	0.138385	1.43503
RPL28	0.138098	1.04171
RPL10	0.13808	1.6406
SELENOF	0.137966	0.532438
GALT	0.137757	0.744008
UTP11	0.137573	0.554924
TGFBRAP1	0.137284	0.644998
CHD2	0.137272	1.03759
PYCR2	0.137174	0.760829
RPL29	0.137113	0.308378
ZNF362	0.137075	0.31005
TERF2IP	0.137057	1.03218
TYMS	0.136983	0.0538527
TOR1AIP1	0.13698	1.26606
MEX3B	0.136957	0.249837
HLA-C	0.136897	0.537943
TEP1	0.136829	0.926184
PEG10	0.136621	0.364006
EXTL2	0.136538	0.840441
ZNF622	0.136479	1.18782
SP1	0.136395	1.53412
PBX2	0.13614	0.629097
KDELR3	0.136104	0.267953
TP53RK	0.136068	0.724313
BAX	0.136052	2.25327
CLPTM1	0.135853	2.41934
RDH11	0.135755	1.37833
RPL7L1	0.135747	1.00652
B3GLCT	0.135742	0.852193
PARP2	0.135548	0.0926647
PRKRA	0.135359	1.79756
SZRD1	0.135162	0.709135
ALG9	0.135052	1.64138
LHFPL2	0.135023	0.43214
AP4M1	0.135012	0.995678
YBX1	0.134918	0.761465
ALKBH5	0.134871	1.24205
RPL19	0.134734	0.940756
NAV2	0.134527	0.224312
NPRL3	0.13419	0.448392
EMC9	0.133909	0.272606
RBBP9	0.133553	0.780345
IPO7	0.133436	0.593179
ZCWPW2	0.133326	0.135017
CSNK1G1	0.133246	1.885
RAB5C	0.133229	3.13381
DNAJC13	0.13308	0.0560304
CLCC1	0.133048	0.481981
NPHP4	0.132955	0.253069
TEX264	0.132868	0.498186
SYVN1	0.132468	1.23349
PDAP1	0.13234	1.66462
KIAA2013	0.132205	1.23946
EPB41	0.132081	0.167571
MBLAC1	0.131934	0.709818
SLC44A1	0.131775	0.580316
ANTKMT	0.131774	0.136389
TMEM35A	0.131771	0.595676
SMAD4	0.131625	0.428232
CHMP2A	0.131517	0.535693
TMEM9B	0.131466	0.71584
CIAO2B	0.131259	0.483685
RDH10	0.131197	0.201428
CHD9	0.13111	0.257106
FAM162A	0.131082	0.498559
CPD	0.130784	0.824953
CUTA	0.130685	0.478929
LIN37	0.130601	0.193045
SETMAR	0.130578	0.535093
SLC11A2	0.130478	0.230507
DAXX	0.130452	0.808889
TMUB2	0.130379	0.210958
RPS15	0.130136	1.83649
PLSCR3	0.130114	0.964645
PGAP6	0.129885	0.478618
TMEM184B	0.129828	0.38837
PDCD4	0.129821	0.468417
DNAJC25	0.129763	0.885846
KIRREL1	0.129597	1.44691
MOSPD2	0.129557	0.313812
SOD3	0.129456	0.250806
SON	0.129131	1.28019
MYD88	0.129008	1.46714
HYI	0.128944	2.45377
POGLUT3	0.128583	0.716143
EMC4	0.128489	0.701789
GCAT	0.128381	1.03141
CLNS1A	0.128326	0.531542
THOC7	0.128284	1.52707
INO80C	0.127914	0.404055
PITPNM1	0.127815	0.560868
CSRP1	0.127779	0.282323
SHOC2	0.127673	1.28385
ZNF281	0.127647	0.486638
GUK1	0.127505	1.27769
IQCJ-SCHIP1	0.127471	0.425935
ZKSCAN1	0.127277	1.56032
ADAM10	0.127197	2.19635
TCTN1	0.127085	0.173724
SLU7	0.126904	1.56176
CMC4	0.126731	0.133415
MEST	0.126485	0.251594
TEFM	0.126282	0.912312
SLC4A7	0.126144	0.522956
INPP5K	0.126068	1.11455
GLRX5	0.125804	2.18863
NOSIP	0.125759	0.505591
GPR148	0.125746	0.293324
TGOLN2	0.125732	1.43163
HMGXB4	0.125576	0.676193
TSFM	0.125547	0.811438
NRP1	0.125544	1.38212
MLX	0.125373	0.422181
TRMT6	0.125317	0.608168
HDAC1	0.12521	1.35495
YIPF6	0.125168	0.720672
CMSS1	0.125109	0.163118
ERP29	0.125084	0.952975
RASAL2	0.124976	0.615846
RAB2B	0.124862	0.499831
CNTNAP3	0.124829	0.30066
POLR2G	0.124821	0.857834
GANAB	0.124797	0.961906
CCDC181	0.124723	0.0426728
KRTCAP2	0.124587	0.40484
ACAT2	0.124387	0.159855
DTD1	0.124285	1.51092
DNAAF10	0.124221	0.874925
ALDH7A1	0.12419	0.824801
RUNX2	0.124077	1.27997
DLC1	0.124076	0.380508
ITGB1	0.124032	1.08468
ZNF443	0.124026	0.0344819
MLYCD	0.123908	0.779131
STX8	0.123812	0.80828
P2RX4	0.12381	0.167229
TTC21A	0.123764	0.326503
MMGT1	0.123745	0.545118
LSM3	0.123583	0.443823
HMGB1	0.12358	1.06322
FADS2B	0.12317	0.444003
TRIM8	0.123147	0.0753593
TM9SF1	0.123135	0.923438
MBD1	0.122935	1.22829
STN1	0.122835	0.335855
TTC7A	0.122753	0.675138
HDAC7	0.122695	2.89012
SMDT1	0.122488	0.467206
CMTR2	0.122438	0.280485
B4GAT1	0.122356	0.535575
MRPS28	0.122306	1.05118
CHID1	0.122293	0.355508
FUCA2	0.122065	0.288999
SERPINF2	0.121777	0.305098
TSPAN5	0.121298	1.02744
MLPH	0.121199	1.92568
SLC35A2	0.121172	0.394232
MANBAL	0.121064	0.623008
GPRC5A	0.120976	1.00935
CRADD	0.120847	0.459473
C17orf75	0.120816	2.65425
RTKN	0.120778	0.728751
ERRFI1	0.12077	0.654826
COPS3	0.120619	0.354509
GTF3C3	0.12056	1.39014
ZNF428	0.120494	0.712429
ATPAF1	0.120465	0.260875
CCNK	0.120434	1.15017
TMEM179B	0.120368	0.654535
MRPS9	0.120241	0.758076
NMNAT1	0.120024	0.742267
NOL7	0.11997	0.468196
ZDHHC20	0.119933	0.859155
KAT5	0.11975	0.456009
ITGA3	0.119741	2.62112
STOM	0.11973	0.455072
MBTPS1	0.119423	0.282556
HES3	0.119384	0.810771
PMS2P11	0.119383	0.430425
CCS	0.119287	0.350471
ISOC2	0.119042	0.466718
TYW3	0.118939	0.757955
B3GAT3	0.118741	0.674183
CALHM2	0.118722	0.277139
PRR16	0.118694	1.12961
RTTN	0.118692	0.249121
LMBRD2	0.118683	0.633965
ZNF818P	0.11865	0.317699
HEG1	0.118619	0.444721
C11orf54	0.118495	0.831518
CDK8	0.118265	1.46454
ROMO1	0.118151	0.839414
ATP2B2	0.118107	1.0868
OTUD7B	0.117903	1.11594
HNRNPA1L2	0.117535	0.797134
THY1	0.117524	0.356389
STX4	0.117494	1.26165
PWWP3A	0.117438	0.574332
MYH10	0.117423	0.911063
SLC7A11	0.117412	0.105007
TPM3	0.117408	3.36475
MRPL53	0.117341	0.586863
FOXK2	0.117311	0.389007
RRAGA	0.117014	0.902439
ANK3	0.117014	1.13911
PTGES2	0.117001	0.252554
HSD17B7	0.116938	0.254988
MXRA8	0.116891	1.05257
PRMT6	0.116765	0.799515
RARS2	0.116671	2.10369
TUT4	0.11661	0.758761
CCNT2	0.116597	0.887517
SHQ1	0.116474	0.329518
PALS1	0.116469	0.803621
SEPTIN6	0.116404	0.308216
CNIH4	0.116381	0.708979
COP1	0.116377	0.183982
SPARC	0.116357	0.172736
H2AC21	0.116277	0.482385
CDK7	0.116271	0.499916
CDAN1	0.116233	0.889205
CADM4	0.116186	0.170583
FGFRL1	0.116119	0.279951
VPS13B	0.115934	1.25719
POM121	0.115775	2.06333
CNOT9	0.115646	0.820874
TMEM67	0.115628	0.424717
HMBS	0.115613	0.431815
PCYOX1L	0.115538	0.874918
PALD1	0.115538	0.561069
SCD	0.115316	0.464152
FOXJ3	0.115283	0.880097
MTARC2	0.115264	2.41868
MBNL2	0.114944	0.481951
ARPC3	0.114711	1.19337
SLC9A1	0.114612	0.741249
ATAD3A	0.114274	1.23632
IDI1	0.114137	0.197754
FARP2	0.114073	0.392739
FBXO17	0.114032	0.475205
H1-3	0.113974	0.944006
CD68	0.113971	0.492307
RMC1	0.113962	1.56399
XPR1	0.113928	1.32274
RIOK3	0.113886	0.280006
C5orf24	0.113791	0.912041
LRP1	0.113728	0.34053
CLEC9A	0.113661	0.246521
PPP1CA	0.113537	1.42297
AAGAB	0.113386	0.658863
CALR	0.113226	0.290327
SCARB1	0.113145	0.421335
ARFGEF2	0.113138	1.89588
WDR6	0.113127	1.50582
DNAJC14	0.113038	0.0749356
PTRH2	0.112944	1.27127
HSDL2	0.112612	0.670888
VTI1A	0.11252	0.429877
STARD7	0.112471	0.661128
B9D1	0.112437	0.790298
CCNDBP1	0.112321	0.200022
RBMXL1	0.112158	1.68677
GEMIN2	0.112145	0.397963
BTN2A1	0.112092	0.694705
SLC38A1	0.112088	0.10533
RBM24	0.112049	0.252605
MRPS33	0.112038	1.35011
KBTBD11	0.112037	0.454886
PGPEP1	0.111885	0.23171
IPO4	0.111851	1.51156
GBA2	0.111715	0.22365
NR2F6	0.111637	1.99019
GPATCH1	0.111576	0.0943759
REPIN1	0.111537	0.228708
NIPA1	0.111467	0.382252
WDR46	0.111077	0.615515
CDK6	0.111062	0.839824
FN3K	0.111005	0.347601
DGCR8	0.110943	0.986477
RFX1	0.110888	0.793932
RPS27	0.110845	0.724293
TDP1	0.110725	0.53975
RBX1	0.11072	0.916877
AGPAT2	0.110638	0.823001
ALDOC	0.110379	0.339368
PYM1	0.110362	0.898278
ELOB	0.110102	1.47254
HMGB2	0.110085	1.34076
SNRNP27	0.109856	0.538422
PDGFC	0.109695	0.443469
ITGA4	0.109663	0.272952
PIGT	0.109559	0.0899113
SIL1	0.109531	0.380096
CD82	0.109519	0.439398
CPSF6	0.109079	1.937
PSMC2	0.109048	1.87429
TMEM231	0.109001	0.39749
HDGF	0.108994	0.797391
ATP6AP2	0.108814	0.983621
RUNX1	0.108657	0.535242
RCOR3	0.108638	0.614593
ARHGEF6	0.108567	0.885832
NHP2	0.108562	0.524363
TMEM245	0.108424	0.569445
ZBTB1	0.108323	0.567396
ZHX3	0.10827	0.0834585
ARHGEF3	0.108191	0.326188
PCBD2	0.108184	0.348047
UNC119	0.108138	0.845446
RPRD1B	0.107835	0.664016
NAXD	0.107705	0.505364
B9D2	0.107487	0.330206
PODXL	0.107454	0.330886
SDE2	0.10742	0.602058
CFAP20	0.107276	1.2932
SH2D5	0.107265	0.236448
DPH1	0.107229	1.02372
MED17	0.107161	1.06892
WBP4	0.107155	0.0175062
TFDP1	0.107056	0.175536
FNTA	0.106898	1.02551
SCLY	0.106893	0.516424
CD63	0.106884	0.46421
CD59	0.106774	0.732279
PTK6	0.106694	0.745248
ZRANB2	0.106623	0.689685
CNOT11	0.10648	1.31395
AP1S3	0.10644	0.431818
LUC7L2	0.106361	1.2691
ENY2	0.106238	0.312341
MAP2K5	0.106157	0.173121
SCAF11	0.10605	0.272132
TTI2	0.106032	0.20953
MTRES1	0.106002	1.11742
SGMS2	0.105836	0.255785
STK10	0.105811	2.10325
IFT22	0.105711	0.357913
TRIM27	0.105613	0.329581
STEAP2	0.105558	0.363792
OR2T27;OR2T7	0.105401	0.0553862
AIFM2	0.105349	1.19312
LIAS	0.10532	0.0490471
CARD19	0.105314	0.858179
CDK5	0.105286	1.12797
CTDSP1	0.105233	0.680033
NUDT16	0.105111	0.728388
DYNLRB1	0.104989	0.728346
RLIM	0.104983	0.19835
RPS6KB1	0.104914	1.16177
SPPL2B	0.10487	0.811847
AAMDC	0.104866	0.362426
TCAF2	0.104718	0.303375
HAUS8	0.104568	0.283029
CENPM	0.104357	0.0748533
EXOSC6	0.104327	0.718198
PIP5K1C	0.10432	0.327923
TNIP1	0.104239	0.476876
BSCL2	0.104225	0.645945
IFRD2	0.104137	0.158516
PGAP4	0.104098	0.424369
GREM1	0.104085	0.140173
TMCO1	0.103942	0.789049
PHB2	0.103912	1.26985
GOLGA7	0.103864	1.3684
LSMEM1	0.103811	0.0354733
TMEM120A	0.103683	0.196321
ATP6V1D	0.103682	1.48528
SRSF9	0.103583	1.68378
BRD3	0.103461	0.647918
ZNF787	0.103387	1.42205
FER	0.103278	0.995407
FLCN	0.103268	0.546569
SIRT6	0.103264	1.28401
PTPRB	0.103118	0.643194
FBXW11	0.103102	0.026729
NCAPD3	0.103064	0.0649365
MOB4	0.102957	1.5092
FURIN	0.10292	0.90187
SKP1	0.102663	0.851703
ITGB3	0.102615	0.188781
AFG2B	0.102574	0.784516
LONP1	0.102563	0.44136
TK2	0.102504	0.393759
MPHOSPH8	0.102481	2.4196
RAB13	0.102453	0.69966
ACP6	0.102397	0.470789
ARL2	0.102336	0.427746
CDC73	0.102285	0.507052
ELL	0.102166	0.84302
PRDX1	0.102089	0.316394
POP7	0.102004	1.29186
UBE2N	0.101863	0.515185
EPB41L1	0.101702	0.235124
DR1	0.101638	0.953486
PARD6B	0.101606	0.600178
MCUB	0.101478	1.20045
INTS5	0.101471	0.476882
GNG12	0.101387	0.343717
MDFIC	0.10116	0.609517
WWTR1	0.101067	0.23806
VMA21	0.101061	0.283375
ARHGAP23	0.100983	0.372306
SNAPIN	0.100854	0.169599
RBL2	0.100851	0.320597
PRF1	0.100746	0.801478
TOR2A	0.100618	0.292309
C1orf174	0.100576	0.310449
H1-4	0.100561	0.541116
SLC43A3	0.100528	0.174986
TCF4	0.100522	0.567513
IL17RA	0.100491	1.17806
STX18	0.100473	0.728216
STUB1	0.100467	0.421834
EML3	0.100321	0.461856
ADAM15	0.10029	1.12336
DVL2	0.100074	0.698626
PACC1	0.100016	0.396853
PTPRK	0.0999565	0.635181
FZD8	0.09994	0.114948
SRFBP1	0.0999374	0.501173
DPCD	0.0999241	0.290073
EIF3F	0.099865	0.335199
SERPINB8	0.0998236	2.81143
SART3	0.0998211	1.75196
PLXND1	0.0997683	0.420955
RAB4B	0.0995115	0.865255
RPL36AL	0.0995083	1.01773
NKIRAS2	0.0992953	0.688851
SPAG5	0.0989068	0.0460942
EPDR1	0.0987415	0.251698
NAA20	0.09869	0.943404
WDR36	0.0986621	0.488694
USP39	0.0986207	0.209652
NDUFAF4	0.0984853	0.504746
CTNNBL1	0.0983925	1.80201
C18orf32	0.0980625	0.354061
TAF2	0.0979741	0.306774
METTL3	0.0979468	1.10006
PITHD1	0.097875	0.943922
RHBDD1	0.0978737	0.442584
TSNAX	0.097683	1.23586
COPZ2	0.0976721	0.542179
IK	0.0976493	1.09392
STK11	0.0975641	0.466559
KIF3B	0.0975253	1.057
RBM33	0.0973911	1.08018
PSMA4	0.0973085	1.83015
DDX56	0.0972672	0.42842
MCTS1	0.0972436	0.758161
ETV6	0.0971343	0.383885
CHUK	0.0969194	1.19667
KIDINS220	0.0969086	0.74965
RHOBTB3	0.0968768	0.34876
LTBP3	0.0967801	0.107428
CTSO	0.0966466	0.113849
NUP107	0.0964597	0.378543
COX7A2	0.0963078	1.17227
TMED5	0.0962461	1.53102
COMMD7	0.0960967	0.547472
PANK2	0.0960375	0.520021
PRMT9	0.0960337	0.553463
PAPSS2	0.0959899	1.21353
FOXP1	0.0959447	0.912259
TRPS1	0.0958277	0.489187
PEX14	0.095801	0.473153
SGPP1	0.0957985	0.0332644
SNRPB2	0.0957375	1.22264
CMTM3	0.0953643	0.236726
C1GALT1C1	0.095218	0.648679
TERF2	0.095218	0.98161
DNTTIP1	0.0951742	1.5316
KLHDC10	0.0946287	0.293839
MNAT1	0.0946102	0.436248
SH3PXD2B	0.0945886	0.298339
DCBLD1	0.0944303	0.722235
PACSIN3	0.094312	0.656626
TMEM70	0.0943101	0.796157
VAMP5	0.0942841	0.327431
GAPDH	0.0942637	0.419382
GTF3C5	0.0942345	0.983781
ARCN1	0.094169	0.702269
MRPL10	0.0940698	0.956732
GPCPD1	0.0940208	0.266348
NECAP2	0.0940075	0.73104
BNC2	0.0939554	1.04116
AIP	0.0939484	0.812145
CEP131	0.0938969	0.212329
GDE1	0.093797	0.510232
TOMM40	0.0937831	0.325926
SYNGR2	0.0934607	2.29511
OGA	0.0933793	1.96563
HOMER3	0.0933507	0.617633
MEN1	0.0933247	0.405881
IPO11	0.0931918	0.448446
UBFD1	0.093188	1.17644
CREBBP	0.0931555	1.69299
BOLA3	0.0930061	0.680106
GLCE	0.092996	2.29697
BORCS5	0.0929871	1.40799
TJP2	0.0928345	0.387491
TUT1	0.0927391	0.182086
MT-ND4	0.0927194	0.232467
PHF21A	0.0927137	0.122101
DNPEP	0.092617	1.40117
GSK3A	0.0926119	0.424479
TMEM47	0.0925884	0.654414
TCF25	0.092563	1.30152
OGFOD1	0.0923208	0.116545
RPL6	0.0923208	1.18083
DOLPP1	0.092289	0.340239
AAAS	0.0921942	0.457914
NBEA	0.092186	0.16616
MEAK7	0.0921535	3.21687
GLIPR1	0.0920862	0.915224
TAF15	0.0919431	1.6905
NUDT1	0.0918369	0.284937
CMIP	0.0917905	0.429861
SLC2A8	0.0917721	0.0994532
POLR3GL	0.0917257	0.318894
RCHY1	0.0917155	0.529708
QSOX1	0.0917041	1.86373
CASP9	0.0916907	0.343703
DENND10	0.0915337	1.84596
RNF123	0.0913785	0.694308
ZMYND8	0.0913353	2.23166
IFT70A	0.0913296	0.56477
PCNP	0.091212	1.25704
TOP3A	0.0911916	0.119473
PDCD10	0.0911382	3.96694
MRPL46	0.0910651	1.79096
ATP1B1	0.0909964	0.82634
DPY19L1	0.0908775	0.593996
SLC52A2	0.0908744	0.618702
TRIM16	0.0907809	0.166382
MZT2B	0.0905717	0.343724
ANP32B	0.0905266	0.490568
KRCC1	0.0905259	0.359054
ALG11	0.0904344	0.587589
ATP8B1	0.0903149	0.475942
GCLM	0.0902869	0.585788
EDEM2	0.0902061	0.948235
XRCC6	0.0901457	1.68518
INTS6	0.0901318	0.692771
VPS4A	0.0900885	0.892801
PIAS2	0.0899792	0.359906
FCHO2	0.0898342	0.833583
ATP5MF	0.0897636	0.787996
EPN3	0.0897598	0.101486
DDX59	0.0896155	0.605681
NCOA3	0.0894464	0.432995
CMTM7	0.0889994	0.271766
HIRIP3	0.0889784	0.166211
GPATCH11	0.0889765	0.229106
RNF121	0.088843	0.591233
TIMM22	0.0887559	0.67456
EFHC1	0.08874	0.513996
RTCA	0.0886847	0.680059
MIF	0.0886567	0.399473
NR2C2	0.0886447	0.393491
RAI1	0.0885728	1.78605
ANKZF1	0.0884279	0.540133
GPS1	0.088426	1.4056
FOXC2	0.0883204	0.0929411
POLR2M	0.0883191	0.341685
DDX60L	0.0882912	0.447412
RFC4	0.0882289	0.191413
ARHGAP32	0.088143	0.112535
PDIA6	0.0879428	0.32093
FRA10AC1	0.0879078	0.348583
HIBCH	0.0878677	0.838435
RPRD1A	0.0877438	0.947265
LRRK1	0.0875804	0.524041
TFRC	0.0875727	0.0834705
KCTD21	0.0875327	0.221674
IMPACT	0.0875161	1.14354
TTC5	0.0875079	1.25601
BACE2	0.087169	0.658504
ATRN	0.0870851	0.830376
PLCD3	0.0870285	0.0949796
RGPD6	0.0869948	0.153012
WDR48	0.0868193	1.04006
NISCH	0.0867532	0.685654
TMEM128	0.0867093	1.51741
AMDHD2	0.0867081	0.544495
ADAM17	0.0866877	0.756892
SMG8	0.0866553	1.31928
MKRN1	0.0866528	0.586201
LYN	0.0866394	0.776092
CCM2	0.0865587	2.11696
PBX1	0.0865523	0.152918
MRPS23	0.0865345	0.984362
MGST2	0.0865332	0.839071
ANXA7	0.0864652	1.64088
RASSF8	0.0864175	0.810123
SEL1L	0.0863991	0.445603
PITPNB	0.0863711	1.05822
SPC25	0.086338	0.105003
LIX1L	0.0862192	0.472872
SNTB1	0.0862077	0.538788
TFB2M	0.0861549	0.332758
NECTIN2	0.086113	0.574361
CCDC169	0.0861098	0.177165
PSMB5	0.0859343	1.04163
TAMM41	0.085933	0.239334
NRF1	0.085893	0.364486
BNIP2	0.0858905	0.418244
SSRP1	0.0858707	0.390049
MGRN1	0.0857245	1.01409
EIF2B4	0.085509	1.39447
GYS1	0.0854842	0.612078
TMEM237	0.0853996	0.127528
TMEM109	0.0853634	0.903989
PIGU	0.0853341	0.459996
RAB6A	0.0852915	0.331875
HCFC2	0.0850811	0.360861
TAOK1	0.0849972	1.94828
PGGT1B	0.0848096	0.366825
TRBV15	0.0848014	0.297219
CAPZA1	0.0847994	1.72558
RBM22	0.0847797	2.31416
TNIP2	0.0845509	0.169154
GPN2	0.0845229	0.468674
NOC4L	0.0845114	0.297362
MCM7	0.084446	0.102499
FLYWCH2	0.0843697	0.381896
CERT1	0.0843455	1.52801
ARHGEF40	0.084343	0.578095
NDUFV3	0.0843283	0.333694
UBL7	0.0842889	0.330228
GAS2L1	0.0842292	0.104269
HAUS5	0.0841853	0.347933
SP110	0.0840937	0.663864
SH3PXD2A	0.0840664	0.691355
CCNH	0.0840333	0.322598
MAPK7	0.0840168	0.524428
CNOT7	0.0839647	1.02967
PSME2	0.0838922	0.598465
CIAO2A	0.0838839	0.407823
SLC2A1	0.0838203	0.32975
TANGO2	0.0838127	0.270664
ITPR1	0.0836747	0.293969
HAS1	0.0836137	0.453362
ATRAID	0.0836112	0.255913
MED24	0.0835641	0.63273
TPBG	0.0834262	0.239616
ARHGDIA	0.0833308	0.490092
PPP6C	0.0831451	0.114269
TMPO	0.0831254	0.294024
MAD2L1	0.0831089	0.0883661
VPS26C	0.0830752	0.764107
ZNF768	0.0830574	0.285062
RPS14	0.0830072	1.41737
ESF1	0.0829182	0.221015
NDUFA11	0.0828985	0.625163
PDE6D	0.0828718	1.15859
TAPT1	0.0827955	0.288889
ZC3HC1	0.082756	0.910293
FEN1	0.0827255	0.230495
HEXB	0.0827045	0.291283
ARMCX6	0.082695	0.309003
FGF2	0.0826658	0.216524
SNRPD2	0.0826251	1.39693
PTPN22	0.0825106	0.0618469
CD58	0.082503	0.244016
ITPKC	0.0824076	0.387716
BAZ1B	0.0823116	0.351527
GSR	0.0822989	0.497605
SNUPN	0.0819906	0.41876
MBP	0.0819283	0.381502
KRT81	0.0819219	0.218629
RAP2B	0.0817426	0.395092
CCDC115	0.0815099	0.581229
RBM15B	0.081344	0.936394
CRTC3	0.0813338	0.376968
RAB3D	0.0813109	0.313611
XPA	0.0812651	0.371935
COX5B	0.0812225	0.41945
ZNF318	0.0811914	2.7424
RFX5	0.0811507	0.922608
GMFB	0.0811125	0.925958
OLFML2A	0.0810579	0.123803
CHMP3	0.080869	1.9195
RIMOC1	0.0808029	0.626441
NIT1	0.0806274	0.435085
NUP155	0.0804666	1.22659
CYTH3	0.0804132	0.852128
CMAS	0.0804087	0.292893
MAGI1	0.0803642	0.0714349
BBS2	0.0803591	0.443773
DIP2A	0.0803534	0.226925
RFT1	0.0803013	0.610685
PLPBP	0.0802085	1.24508
PRPF38A	0.0801093	1.24145
TRIT1	0.080005	0.288127
THUMPD3	0.0799567	0.445512
NASP	0.0799465	0.388735
PLD3	0.0799173	0.109251
DSN1	0.079895	0.249357
ANKRD50	0.0798861	0.63488
KBTBD4	0.0798041	0.440889
C6orf52	0.0796884	0.43117
PRRC1	0.0796439	0.426088
MEPCE	0.0794442	0.640745
HPS3	0.079415	0.738607
SNRPGP15	0.0792408	0.61409
QTRT2	0.0792236	0.535963
NUBPL	0.0791899	0.219379
SMARCE1	0.0790965	0.442642
MIB1	0.0790946	1.67043
IRF2BPL	0.0788682	0.352832
GSTT2B	0.0787868	0.374728
SPNS1	0.0787258	0.213126
RPS8	0.078694	1.09004
PSMA3	0.078647	2.00545
ARMC1	0.078584	0.494838
CRYZL1	0.078572	1.30187
FAM229A	0.078462	0.177337
HSPA12A	0.0783272	0.488876
CMPK1	0.0781911	0.510456
LZIC	0.0781333	2.46838
HELZ2	0.0781123	0.457982
NAGPA	0.078071	0.175352
LMF2	0.0780169	0.359663
SPIN1	0.077898	0.320288
ZNF280D	0.0778103	0.878915
HSPA13	0.0777982	0.792601
COA7	0.0777798	0.316779
ZFAND3	0.0776653	0.343118
TRIR	0.077652	0.324544
TMEM259	0.0774193	0.979072
WDSUB1	0.0773468	1.05102
RPL5	0.0772731	1.39549
MEIS1	0.0771948	0.417518
SNX17	0.0771109	1.28488
HMGB3	0.0770836	0.456047
TSR3	0.0770709	0.401515
ZDHHC13	0.0770124	0.442977
RAB31	0.0769545	1.02783
GINS3	0.0769259	0.0916099
PDE5A	0.0769215	0.460369
VDAC3	0.0769176	0.912747
BRI3	0.0768604	0.57072
FBXL20	0.0768585	0.204832
PHLDA3	0.0766697	0.407786
PSMC1	0.0766691	1.7519
PA2G4	0.0766691	0.238942
NOM1	0.0766385	0.175659
POLR3A	0.0766074	0.30823
SLC39A14	0.0765444	0.331184
MAPRE2	0.0764936	0.311324
TPP1	0.0764656	0.136286
KCNMA1	0.0763467	1.02009
UBE2D1	0.0762889	0.59562
RBM42	0.0762647	0.658443
SGCE	0.0762418	0.485241
WRNIP1	0.076217	0.26504
EXOSC7	0.0761954	0.6172
TSPAN31	0.0761808	0.127478
MTMR12	0.0761655	1.96432
ATP1B3	0.076149	1.30902
PTPRS	0.0761191	0.278932
RPL4	0.0760339	0.616617
GRAMD4	0.0760129	0.217527
RALGAPA1	0.0759506	0.417094
GNPTG	0.07584	0.231957
SF3B5	0.0758343	0.11565
EZH2	0.0758336	0.0991794
SLC35F6	0.0758298	0.526332
UBQLN2	0.0758139	0.871876
C11orf68	0.0756423	1.07981
UBAC1	0.0756397	0.725785
HEBP1	0.0756378	0.877389
UTP23	0.0756098	0.956901
CPSF4	0.0755857	1.70053
CS	0.075573	0.826374
ZNF316	0.075545	0.268874
MRPL48	0.0755094	0.608247
DLST	0.0755068	0.800832
ALDH9A1	0.0753606	0.978061
ALG6	0.0751673	0.608043
SIPA1L1	0.0751375	0.372554
CHMP4A	0.0751368	1.25088
GNB2	0.0750841	0.292895
SMIM11	0.0750529	0.019765
FKRP	0.0750453	0.425741
COL18A1	0.0748653	0.09283
GNPAT	0.0748628	0.57617
SERPINB2	0.0748622	0.275699
PPIA	0.0748431	0.277659
SNRPA	0.0747039	0.768606
SOX9	0.0746657	0.540453
SF1	0.0746644	0.445394
KIFBP	0.0746574	0.340804
DHX36	0.0746333	0.543704
[truncated: 6,128 more rows]

## Sheet: Significantly Up
Genes	Log2FC	LOG10 p-VALUE
CXCL8	7.4046	3.09375
DUSP1	6.08792	3.61261
CXCL3	4.69489	2.11622
IER3	4.45014	2.83772
ATF3	4.43684	4.06338
NFKBIZ	4.4075	2.07107
CCL2	4.36022	2.43415
GADD45A	4.22093	2.63509
HBEGF	4.08091	2.43247
ITM2C	4.03149	2.99821
UBB;UBC	3.85937	2.18395
CXCL1	3.80454	3.19854
KLHL17	3.7727	3.24743
NR1D2	3.59079	2.44758
IL6	3.58128	2.6466
GABARAP	3.57355	4.16439
EPC1	3.48067	3.12183
EGR1	3.33149	3.17004
LIF	3.21133	5.07493
IRF1	3.17059	2.56266
NEDD9	3.14181	2.52444
GEM	3.09319	1.57549
ZFP36	3.07346	2.30034
FOS	2.85529	1.80901
FBXO32	2.80238	3.13689
HMGCR	2.7594	1.91078
UNQ6494/PRO21346	2.74676	2.68656
TNFAIP3	2.73339	2.3982
CEBPD	2.73104	2.81023
WDR17	2.69404	1.32081
DNAJC12	2.67083	1.51483
NUAK2	2.49981	2.4983
BHLHE40	2.45884	3.87551
CCDC166	2.38943	1.48398
KLF6	2.33893	2.41406
PMS2P1	2.25028	2.39385
IL1B	2.19362	3.77357
AP5M1	2.18062	1.57597
DDIT4	2.04665	2.5486
INHBA	2.03279	3.11267
COL2A1	2.03013	4.72736
CSDC2	2.02432	2.13147
TRAJ25	2.00695	2.20095
SLC34A3	1.95817	1.40689
FOSB	1.86938	2.02764
GPR108	1.83529	2.77408
PTGS2	1.83004	1.42887
KLF10	1.81062	1.7384
TMEM39A	1.79818	1.74799
ZNF429	1.79704	1.91909
RND3	1.79057	4.06302
CITED2	1.78906	2.53596
JUNB	1.77369	2.2086
DUXA	1.73973	3.21379
GINM1	1.63966	1.63926
ANKRD1	1.62645	2.25413
ZFP36L1	1.57331	3.74518
CCN2	1.54894	3.42143
CD164L2	1.50978	1.86427
APOE	1.49945	3.22664
ARRDC3	1.47098	3.89743
PTX3	1.3566	3.56462
PLEKHB2	1.3496	1.31239
RGS4	1.3447	1.50582
MAFF	1.30519	2.23712
RNF152	1.29513	1.53417
IER2	1.29403	1.48198
ZBTB38	1.27952	1.39016
APOA1	1.24518	1.61949
TMEM59	1.24508	3.38578
GIG44	1.24091	1.90437
AUH	1.23572	1.52624
PNLIP	1.23096	1.38508
SCML1	1.2264	1.30465
MCL1	1.22636	3.06306
UCKL1	1.21717	2.22906
NOCT	1.17163	3.02753
SIK1B	1.13242	2.97027
NRBP1	1.11306	2.12556
CCN1	1.08852	2.77849
GID8	1.08056	2.97491
HGFAC	1.05453	1.80942
ETS1	1.0509	3.63806
APOB	1.03045	1.30794
PYGO1	1.02089	1.59033
HPX	1.01469	2.91008

## Sheet: Significantly Down
Genes	Log2FC	LOG10 p-VALUE
PLIN5	-1.05633	2.59295
GPR171	-1.05996	1.53534
PPP2R2C	-1.06148	2.50378
NFKBIB	-1.08355	4.39786
RASL12	-1.08957	1.32612
JPT2	-1.09337	2.8242
HCP5	-1.09748	1.39059
PLXNB1	-1.12626	1.35744
CASP14	-1.13102	1.48994
SVBP	-1.17106	3.04142
HIF1A	-1.26581	1.66861
LAYN	-1.27446	1.49865
RPL26L1	-1.27973	2.11133
VASN	-1.31761	3.65703
FLG	-1.32924	2.41856
PKP1	-1.34256	1.73086
DSG1	-1.37714	1.40651
ENC1	-1.47752	1.32036
ZDHHC19	-1.55895	1.49751
EVPLL	-1.58068	1.54463
SSNA1	-1.61348	2.7002
ANKRD36B	-1.62714	1.48019
KRT5	-1.64583	1.75324
KRT1	-1.68087	1.97907
OR4F6	-1.70788	1.41792
NPY1R	-1.75626	1.30426
SERPINB12	-1.76101	1.33976
DSCAML1	-1.78301	2.03371
OR4A16	-1.8131	2.36732
KRT9	-1.82808	1.77914
VWA7	-1.92494	1.32238
CFLAR	-1.96587	2.02531
CSF1R	-1.99041	2.91635
INSIG1	-1.99877	1.73845
TBC1D9	-2.10388	1.34705
KRT2	-2.1195	2.77366
EPHA6	-2.27199	1.86085
TCEA2	-2.30648	3.68107
MAP2K7	-2.30781	2.33257
HRNR	-2.36058	2.76996
KRT10	-2.3826	3.25245
FAM157C	-2.44122	3.19048
KRT14	-2.5044	2.00406
TGM3	-2.53097	1.69859
TMBIM6	-2.54496	3.74946
FLG2	-2.72061	3.43552
TNFAIP8L2	-2.78121	2.04191
TMEM127	-2.79617	2.14189
H3Y1;H3Y2	-2.85711	2.24364
ZNF676	-2.87324	2.59255
RSPO2	-2.9747	2.3812
KPLCE	-3.00809	2.21751
MTMR7	-3.28515	1.76118
GLMP	-3.38881	2.34759
KRT71	-3.39627	2.06922
KRT77	-3.54107	2.00754
KPRP	-3.80074	3.18582
OR52L1	-3.80523	2.84265
PLCH2	-4.13263	1.84948
ZNF844	-4.88103	2.69278
