# Supplementary material for: Ubiquitination-activated TAB–TAK1–IKK–NF-κB axis modulates gene expression for cell survival in the lysosomal damage response
Source: bioRxiv preprint, doi:10.1101/2025.03.26.645624, version 2 (2025-07-31)
Supplement: Table S4 [file 645624_file05.xlsx]

## Sheet: Counts Log2FC -LogPvalue
	siControl_1	siControl_2	siControl_3	siControl_LLOMe_1	siControl_LLOMe_2	siControl_LLOMe_3	siTAB2-3_1	siTAB2-3_2	siTAB2-3_3	siTAB2-3_LLOMe_1	siTAB2-3_LLOMe_2	siTAB2-3_LLOMe_3	siTAK1_1	siTAK1_2	siTAK1_3	siTAK1_LLOMe_1	siTAK1_LLOMe_2	siTAK1_LLOMe_3	log2FoldChange	pvalue	status	log2FoldChange	pvalue	status	log2FoldChange	pvalue	status	gene_name	log2FoldChange	lfcSE	stat	pvalue	padj	status	log2FoldChange	lfcSE	stat	pvalue	padj	status
ENSG00000000003.15	368	428	354	335	219	184	225	160	297	266	131	233	397	346	378	297	249	244	-0.383947	0.0204937	OK	0.00392987	0.982499	OK	-0.217684	0.20159	OK	TSPAN6	-0.138471	0.191615	-0.722654	0.469893	0.727529	OK	0.137508	0.183502	0.749356	0.453643	0.783258	OK
ENSG00000000419.12	239	266	244	294	199	212	193	188	249	224	135	199	255	211	237	250	194	213	0.197911	0.207851	OK	-0.256257	0.172697	OK	0.130683	0.453592	OK	DPM1	-0.390532	0.173307	-2.25341	0.024233	0.122817	OK	-0.098596	0.171295	-0.575593	0.56489	0.849507	OK
ENSG00000000457.14	68	95	79	43	47	37	50	46	60	42	29	43	98	80	89	31	48	35	-0.389269	0.236988	OK	-0.280066	0.431783	OK	-0.868156	0.0176657	OK	SCYL3	-0.0605433	0.392451	-0.15427	0.877397	0.954296	OK	-0.274662	0.426864	-0.643443	0.519937	0.823904	OK
ENSG00000000460.17	40	46	43	33	19	34	57	15	46	61	24	45	37	21	48	36	23	33	-0.577638	0.156878	OK	0.128858	0.805617	OK	-0.00392425	0.993403	OK	C1orf112	0.451037	0.419561	1.07502	0.282366	0.560512	OK	0.258922	0.454697	0.56944	0.569058	0.85228	OK
ENSG00000000971.15	4745	5971	6512	4841	3446	4208	3464	2786	5290	3712	2189	3658	7491	7312	9588	6036	4876	5811	-0.199309	0.150166	OK	-0.288941	0.0308819	OK	-0.307271	0.00287714	OK	CFH	-0.403095	0.132308	-3.04664	0.00231416	0.0214257	OK	0.426631	0.130366	3.27257	0.00106576	0.0168923	OK
ENSG00000001036.14	1151	1207	1072	1241	759	729	967	643	1029	1196	602	800	1296	1094	1368	1145	945	978	-0.0839406	0.422482	OK	-0.0790337	0.501901	OK	-0.0620321	0.550476	OK	FUCA2	-0.0957713	0.125428	-0.763554	0.445133	0.709749	OK	0.212431	0.116572	1.82231	0.0684074	0.314344	OK
ENSG00000001084.13	165	200	165	186	127	115	183	144	191	267	137	182	160	159	179	222	132	129	0.110132	0.642963	OK	0.496806	0.0520418	OK	0.626675	0.021545	OK	GCLC	0.406882	0.275497	1.4769	0.139701	0.383087	OK	0.352156	0.266257	1.32262	0.185962	0.536915	OK
ENSG00000001167.14	485	444	445	532	320	379	422	301	448	526	282	395	507	452	517	495	369	353	0.0390578	0.787718	OK	0.00290548	0.982804	OK	-0.0784415	0.596653	OK	NFYA	0.0156503	0.141773	0.110389	0.9121	0.968307	OK	-0.00890717	0.159777	-0.0557475	0.955543	0.988966	OK
ENSG00000001460.18	89	62	69	115	89	86	78	41	82	127	56	87	66	69	76	107	106	91	0.514646	0.0596084	OK	0.36166	0.196367	OK	0.523594	0.0394299	OK	STPG1	-0.137771	0.250039	-0.550998	0.581635	0.804824	OK	0.139392	0.246109	0.566383	0.571134	0.853932	OK
ENSG00000001461.17	619	673	545	758	452	455	525	348	581	844	364	568	564	595	649	584	406	483	0.120116	0.359588	OK	0.183696	0.184125	OK	-0.0419525	0.780903	OK	NIPAL3	0.0367611	0.147647	0.24898	0.803377	0.921405	OK	-0.145366	0.160274	-0.906987	0.364413	0.718522	OK
ENSG00000001497.16	251	236	233	214	120	136	185	149	228	211	128	167	229	178	265	170	139	129	-0.279734	0.141233	OK	-0.166818	0.405139	OK	-0.287777	0.221956	OK	LAS1L	0.0530052	0.206067	0.257224	0.797006	0.918135	OK	-0.0816154	0.252437	-0.32331	0.74646	0.926923	OK
ENSG00000001617.12	2677	2684	2606	2442	1651	1784	1926	1401	2090	2038	1139	1876	3391	2983	3542	2926	2333	2339	-0.268779	0.00380568	OK	-0.216953	0.0251472	OK	-0.183475	0.0671429	OK	SEMA3F	-0.274644	0.106875	-2.56978	0.0101763	0.0661437	OK	0.3708	0.109695	3.38029	0.000724104	0.0124073	OK
ENSG00000001629.10	926	988	1002	1087	718	680	790	614	908	990	479	769	917	882	1105	885	643	684	0.39647	0.00185111	OK	-0.0231646	0.899019	OK	-0.248522	0.106474	OK	ANKIB1	-0.116581	0.189899	-0.613907	0.539277	0.776361	OK	0.0849613	0.147198	0.577191	0.56381	0.848499	OK
ENSG00000001630.17	2527	952	941	4973	1530	1694	1570	549	912	3234	1078	1667	2523	922	1335	3982	1774	2241	1.00253	0.105565	OK	0.876878	0.0332336	OK	0.956582	0.0442145	OK	CYP51A1	-0.446572	0.435221	-1.02608	0.304853	0.584313	OK	0.0899992	0.449278	0.20032	0.84123	0.957424	OK
ENSG00000001631.15	210	265	205	348	262	178	92	129	182	254	163	172	225	195	182	269	247	207	0.27028	0.142702	OK	0.354789	0.148817	OK	0.308706	0.124836	OK	KRIT1	-0.408909	0.234906	-1.74073	0.0817303	0.274632	OK	-0.150532	0.191405	-0.786458	0.431599	0.766378	OK
ENSG00000002016.18	55	74	58	55	42	41	30	24	49	36	32	43	60	63	84	48	43	49	-0.191964	0.608063	OK	0.807675	0.0729698	OK	-0.0944371	0.77167	OK	RAD52	-0.41825	0.443369	-0.943345	0.345504	0.625606	OK	-0.255545	0.377066	-0.67772	0.497949	0.811326	OK
ENSG00000002330.13	324	352	327	318	262	258	282	251	316	437	249	332	319	310	374	360	274	332	0.00533655	0.971792	OK	0.109281	0.501462	OK	0.185292	0.24283	OK	BAD	0.113846	0.157501	0.722825	0.469788	0.727523	OK	0.156059	0.169537	0.9205	0.357312	0.71235	OK
ENSG00000002549.12	303	227	193	279	115	165	169	105	152	224	115	160	241	175	173	221	151	154	-0.163345	0.500646	OK	0.120198	0.594424	OK	0.0987064	0.655386	OK	LAP3	-0.135168	0.239503	-0.564369	0.572503	0.797891	OK	0.0293236	0.241604	0.121371	0.903398	0.975198	OK
ENSG00000002586.20	1497	1948	1889	1616	1344	1539	1329	1204	1861	1889	1242	1877	1739	1887	2377	1723	1848	1998	0.0185923	0.893099	OK	0.0722681	0.584039	OK	0.131335	0.303714	OK	CD99	0.0460822	0.145966	0.315704	0.752227	0.89775	OK	0.284666	0.151783	1.87549	0.0607259	0.295148	OK
ENSG00000002587.10	18	29	38	11	13	12	12	21	14	15	8	13	11	21	25	5	4	11	-1.27454	0.113355	OK	1.54131	0.0366541	OK	-0.177016	0.835715	OK	HS3ST1	0.965185	0.802839	1.20221	0.22928	0.502965	OK	-0.815919	0.927383	-0.879807	0.378964	0.72896	OK
ENSG00000002822.15	104	152	135	132	96	99	148	71	122	154	77	108	140	111	144	99	88	100	0.167994	0.465828	OK	0.353213	0.176331	OK	-0.0111446	0.969394	OK	MAD1L1	0.112042	0.259005	0.432586	0.665315	0.851257	OK	0.113413	0.299005	0.379303	0.704463	0.91111	OK
ENSG00000002834.18	5515	5887	5537	5017	3203	3441	4911	3584	5600	5485	2975	4380	6763	5957	7269	5746	4633	5042	-0.30645	6.56158e-05	OK	-0.189249	0.0178761	OK	-0.147116	0.096247	OK	LASP1	0.116288	0.0898795	1.29382	0.195728	0.459948	OK	0.42097	0.0975513	4.31537	1.59335e-05	0.000520839	OK
ENSG00000002919.14	242	239	209	270	134	152	189	179	235	273	176	191	239	204	257	251	158	179	-0.127733	0.5356	OK	-0.0412591	0.829644	OK	-0.0899041	0.643851	OK	SNX11	0.124759	0.217799	0.572817	0.566769	0.794611	OK	0.036119	0.223346	0.161718	0.871528	0.967521	OK
ENSG00000003056.8	1173	1191	1124	1319	909	942	1031	786	1176	1493	854	1176	1151	1115	1289	1380	1151	1225	0.20202	0.0574627	OK	0.205989	0.062308	OK	0.33465	0.00159654	OK	M6PR	0.236235	0.121434	1.94538	0.0517287	0.204645	OK	0.244291	0.115642	2.11247	0.0346463	0.209669	OK
ENSG00000003096.14	81	68	50	51	32	26	64	35	45	52	31	26	38	41	42	31	18	19	-0.940523	0.00556905	OK	-0.473623	0.223148	OK	-0.670248	0.114539	OK	KLHL13	0.0156012	0.399232	0.039078	0.968828	0.98846	OK	-0.643854	0.429686	-1.49843	0.134022	0.459885	OK
ENSG00000003137.8	13	15	17	30	25	19	15	15	16	48	20	32	39	32	32	21	20	31	0.731913	0.217008	OK	1.19735	0.0139439	OK	-0.0979813	0.864527	OK	CYP26B1	0.355327	0.46584	0.762766	0.445603	0.710223	OK	0.507189	0.551291	0.920003	0.357571	0.71235	OK
ENSG00000003249.13	261	328	291	295	178	221	230	219	306	325	222	266	353	344	373	291	275	319	-0.0822204	0.602685	OK	0.037019	0.830884	OK	-0.0882582	0.565264	OK	DBNDD1	0.159338	0.167239	0.952758	0.340713	0.620679	OK	0.338979	0.171003	1.9823	0.0474456	0.255493	OK
ENSG00000003393.15	597	606	523	720	419	425	721	435	711	921	431	561	612	505	659	643	507	529	0.42438	0.000466982	OK	0.455355	0.000139064	OK	0.584568	3.80189e-05	OK	ALS2	0.284235	0.126006	2.25573	0.0240875	0.122315	OK	0.342879	0.140625	2.43825	0.0147584	0.118537	OK
ENSG00000003402.20	849	717	737	1213	863	874	866	482	813	897	496	613	529	475	572	523	418	434	0.840705	3.92989e-07	OK	0.0233631	0.883675	OK	0.210132	0.157268	OK	CFLAR	-0.621918	0.153121	-4.06161	4.87361e-05	0.000893404	OK	-1.19862	0.149645	-8.00973	1.14963e-15	1.81558e-13	OK
ENSG00000003436.16	430	619	653	751	458	557	431	286	492	627	305	470	442	381	710	440	394	536	0.308812	0.0499158	OK	0.227245	0.153916	OK	0.228156	0.240769	OK	TFPI	-0.214967	0.165666	-1.29759	0.194427	0.457953	OK	-0.180485	0.187458	-0.962798	0.335649	0.695273	OK
ENSG00000003509.16	61	79	75	84	64	58	41	39	46	66	50	39	75	78	70	70	55	54	0.200845	0.481593	OK	0.410483	0.246972	OK	0.166123	0.59414	OK	NDUFAF7	-0.303952	0.321528	-0.945335	0.344488	0.624376	OK	-0.00986766	0.319696	-0.0308657	0.975377	0.994414	OK
ENSG00000003756.17	751	877	803	834	551	582	534	416	684	640	392	560	784	748	982	625	621	587	0.219915	0.0508114	OK	-0.106607	0.425067	OK	-0.0256755	0.844118	OK	RBM5	-0.492436	0.13657	-3.60573	0.000311271	0.0043631	OK	-0.196155	0.128701	-1.52411	0.127481	0.447753	OK
ENSG00000004059.11	941	1018	958	1034	669	725	734	594	937	956	596	828	996	911	1091	1052	890	899	-0.0759477	0.50168	OK	-0.0641858	0.648952	OK	0.159142	0.162386	OK	ARF5	-0.116629	0.127299	-0.916183	0.359571	0.638084	OK	0.184234	0.126953	1.45119	0.146727	0.482512	OK
ENSG00000004139.14	927	834	743	691	402	409	838	521	754	777	339	520	828	564	693	517	394	414	-0.45282	0.00414607	OK	-0.396329	0.00873194	OK	-0.480933	0.00972342	OK	SARM1	0.202607	0.140286	1.44424	0.148672	0.396606	OK	-0.140615	0.162469	-0.865488	0.386771	0.733678	OK
ENSG00000004142.12	933	1010	915	944	554	610	815	582	815	852	508	688	888	797	1035	828	605	617	-0.176531	0.0989939	OK	-0.19477	0.147564	OK	-0.204537	0.0974138	OK	POLDIP2	-0.12646	0.131904	-0.958724	0.337698	0.617874	OK	-0.0883554	0.133838	-0.660168	0.509146	0.817761	OK
ENSG00000004399.12	1361	1285	1243	1171	594	696	2055	1263	1788	2076	1014	1291	2001	1678	1742	1295	998	933	-0.398415	0.00568918	OK	-0.213915	0.128327	OK	-0.454371	0.00504831	OK	PLXND1	0.79904	0.161488	4.94797	7.49917e-07	2.30617e-05	OK	0.431634	0.184733	2.33653	0.0194635	0.143572	OK
ENSG00000004455.17	985	1100	983	816	621	670	968	854	1316	1082	779	1152	1043	962	1271	771	838	921	-0.113014	0.289683	OK	0.153036	0.267599	OK	-0.0269048	0.840585	OK	AK2	0.431462	0.143508	3.00653	0.00264247	0.0238202	OK	0.23477	0.142737	1.64477	0.100017	0.391001	OK
ENSG00000004478.8	442	503	471	707	576	520	388	242	454	769	585	666	381	343	523	673	943	713	0.802264	3.5451e-07	OK	0.983566	3.22983e-08	OK	1.35422	2.49654e-09	OK	FKBP4	0.0852525	0.190567	0.447363	0.654613	0.844906	OK	0.289236	0.232674	1.24309	0.213833	0.571264	OK
ENSG00000004487.16	1059	1147	1049	1047	697	669	962	669	1018	1096	638	917	1109	945	1146	845	739	727	-0.182976	0.0712439	OK	-0.0897769	0.388667	OK	-0.238061	0.0299195	OK	KDM1A	0.0684504	0.110979	0.616784	0.537377	0.775438	OK	-0.0628445	0.115654	-0.543385	0.586865	0.863896	OK
ENSG00000004534.15	583	621	528	588	451	446	493	345	526	441	323	407	557	482	659	476	453	493	0.0796591	0.54167	OK	-0.00491991	0.9787	OK	0.0194685	0.883502	OK	RBM6	-0.148194	0.187658	-0.789705	0.4297	0.696851	OK	0.00276217	0.144438	0.0191236	0.984742	0.996708	OK
ENSG00000004660.15	160	118	98	54	29	48	111	70	121	98	57	73	112	69	100	91	65	65	-1.27402	3.18751e-05	OK	-0.501119	0.0452628	OK	-0.156316	0.571433	OK	CAMKK1	0.706812	0.313246	2.25641	0.0240451	0.122194	OK	0.717234	0.321419	2.23146	0.0256504	0.173575	OK
ENSG00000004700.16	700	819	869	601	412	476	615	446	756	650	376	525	839	658	1009	591	492	557	-0.45025	0.000681276	OK	-0.25954	0.0403688	OK	-0.398567	0.00183278	OK	RECQL	0.0507235	0.136754	0.37091	0.710705	0.874682	OK	0.207569	0.139029	1.493	0.135438	0.462684	OK
ENSG00000004766.17	230	194	181	245	103	110	152	125	176	153	86	113	166	127	174	126	78	99	0.27818	0.348091	OK	0.276777	0.277779	OK	-0.275236	0.382045	OK	VPS50	-0.366883	0.325334	-1.12771	0.259442	0.534394	OK	-0.72899	0.322987	-2.25703	0.0240064	0.165805	OK
ENSG00000004776.13	40	40	27	54	36	25	26	16	25	33	18	19	40	21	36	51	37	34	0.285603	0.458729	OK	-0.100865	0.831317	OK	0.469383	0.231198	OK	HSPB6	-0.795235	0.426525	-1.86445	0.0622584	0.230392	OK	0.0886608	0.377173	0.235067	0.814157	0.95023	OK
ENSG00000004777.18	52	87	65	84	52	62	111	66	94	134	68	119	66	62	79	66	59	70	0.458184	0.176963	OK	-0.205314	0.459249	OK	0.268033	0.414053	OK	ARHGAP33	0.538652	0.265806	2.02648	0.0427155	0.180546	OK	-0.28628	0.328126	-0.872469	0.382953	0.730364	OK
ENSG00000004779.10	289	278	274	204	182	164	220	177	273	223	150	198	251	241	343	275	187	201	-0.325513	0.0681077	OK	-0.313503	0.0778935	OK	-0.122156	0.499412	OK	NDUFAB1	-0.0239215	0.197254	-0.121273	0.903475	0.965849	OK	0.220077	0.202354	1.08758	0.276779	0.637054	OK
ENSG00000004864.13	245	196	247	236	156	157	302	164	222	349	135	228	213	184	256	241	159	142	-0.19434	0.473505	OK	-0.304801	0.350698	OK	0.0418434	0.839027	OK	SLC25A13	0.24976	0.244761	1.02042	0.307527	0.586666	OK	0.10892	0.227423	0.478934	0.631986	0.884861	OK
ENSG00000004866.20	137	153	152	221	166	138	130	74	132	211	105	169	151	123	177	185	142	161	0.499047	0.0192898	OK	0.331431	0.206168	OK	0.383431	0.069371	OK	ST7	-0.117244	0.220232	-0.532365	0.594473	0.813615	OK	-0.073438	0.197338	-0.372143	0.709786	0.913219	OK
ENSG00000004897.12	1154	1206	1075	1095	639	624	1318	772	1307	1232	647	920	1192	930	1162	828	679	737	0.0492409	0.74711	OK	-0.158533	0.369651	OK	-0.395768	0.0140509	OK	CDC27	0.0937544	0.165472	0.566586	0.570995	0.796929	OK	-0.264127	0.139183	-1.8977	0.0577351	0.285846	OK
ENSG00000004961.15	256	268	278	331	240	260	221	171	233	353	208	286	266	215	292	280	270	228	0.280416	0.085159	OK	0.345389	0.0469163	OK	0.202499	0.232119	OK	HCCS	0.000591691	0.162058	0.00365111	0.997087	0.999131	OK	-0.201957	0.165137	-1.22297	0.221341	0.578492	OK
ENSG00000004975.12	402	388	373	727	309	389	292	163	275	597	350	478	372	296	360	630	430	450	0.416651	0.022778	OK	0.845514	2.88964e-06	OK	0.792826	1.84561e-06	OK	DVL2	0.0073865	0.183818	0.0401838	0.967947	0.98846	OK	0.218412	0.203492	1.07332	0.283126	0.644756	OK
ENSG00000005007.12	1257	1361	1357	1128	684	810	1097	754	1224	1319	714	973	1418	1280	1567	1074	865	946	-0.220075	0.0588707	OK	-0.0555358	0.595902	OK	-0.278823	0.00704437	OK	UPF1	0.0689768	0.12749	0.541038	0.588481	0.809193	OK	0.0836963	0.131877	0.634656	0.525653	0.826964	OK
ENSG00000005020.13	34	31	38	45	23	14	27	28	28	43	14	38	33	19	35	39	21	27	-0.210309	0.682421	OK	0.0503875	0.911008	OK	0.211603	0.647079	OK	SKAP2	-0.26699	0.471403	-0.566373	0.57114	0.796929	OK	-0.0445946	0.458689	-0.0972217	0.92255	0.979868	OK
ENSG00000005022.6	1207	1157	975	1218	755	721	1288	815	1165	1589	786	1018	1044	901	1064	1021	823	829	-0.0698413	0.519375	OK	-0.0889885	0.523485	OK	0.112629	0.314283	OK	SLC25A5	0.256091	0.130668	1.95986	0.0500124	0.200419	OK	0.0565314	0.116344	0.4859	0.627038	0.882264	OK
ENSG00000005059.16	153	149	158	141	114	87	145	101	131	184	99	126	123	105	159	142	124	118	-0.0220682	0.921265	OK	0.135584	0.572438	OK	0.145205	0.547649	OK	MCUB	0.275862	0.241205	1.14369	0.252754	0.526553	OK	0.18624	0.251864	0.739446	0.459636	0.786985	OK
ENSG00000005075.15	270	277	293	274	206	240	252	203	274	325	206	305	280	200	318	279	275	281	0.0458725	0.78371	OK	0.0918047	0.572344	OK	0.294988	0.0906183	OK	POLR2J	0.123823	0.173258	0.714675	0.47481	0.731785	OK	0.183373	0.174721	1.04952	0.293939	0.655375	OK
ENSG00000005100.13	307	311	289	290	181	149	255	175	283	242	138	185	264	243	299	202	153	153	-0.201998	0.224342	OK	-0.414374	0.023076	OK	-0.473604	0.00816552	OK	DHX33	-0.153992	0.193324	-0.796552	0.425711	0.693467	OK	-0.386962	0.189705	-2.03981	0.0413695	0.23475	OK
ENSG00000005108.16	101	121	90	162	69	91	51	30	50	61	33	50	107	71	108	81	76	84	-0.140578	0.605457	OK	-0.11903	0.731682	OK	-0.316564	0.316467	OK	THSD7A	-1.16128	0.291152	-3.98856	6.64763e-05	0.00117919	OK	-0.11528	0.293692	-0.39252	0.694674	0.907085	OK
ENSG00000005156.12	286	281	260	241	139	148	239	186	275	249	145	177	346	286	348	180	153	147	-0.0393037	0.880548	OK	-0.476785	0.0485898	OK	-0.588101	0.00119369	OK	LIG3	-0.563856	0.224575	-2.51077	0.0120469	0.0742636	OK	-0.136211	0.204813	-0.665052	0.506017	0.815851	OK
ENSG00000005175.10	302	323	262	273	136	140	270	220	282	262	136	222	304	215	289	196	164	138	-0.425611	0.0288333	OK	-0.31861	0.0624982	OK	-0.255023	0.207676	OK	RPAP3	0.277262	0.200206	1.38488	0.166089	0.421695	OK	-0.0921182	0.217708	-0.423127	0.672203	0.90009	OK
ENSG00000005189.19	25	19	25	38	17	22	27	9	18	27	22	28	17	13	12	18	14	17	0.44287	0.354697	OK	0.391378	0.458714	OK	-0.163745	0.78064	OK	REXO5	0.112893	0.473706	0.238318	0.811634	0.924639	OK	-1.02861	0.491491	-2.09284	0.0363633	0.215289	OK
ENSG00000005194.15	365	354	369	321	184	222	399	236	361	348	141	237	454	343	399	263	229	245	-0.283968	0.0770277	OK	-0.638108	0.00243409	OK	-0.621081	0.000565145	OK	CIAPIN1	-0.0924955	0.212214	-0.435859	0.662939	0.849786	OK	-0.0706325	0.173683	-0.406674	0.684247	0.904413	OK
ENSG00000005206.17	512	535	551	504	358	369	477	343	509	532	387	481	533	575	619	478	454	469	-0.149065	0.242684	OK	-0.122466	0.365049	OK	-0.117891	0.420491	OK	SPPL2B	0.0641629	0.142404	0.45057	0.652299	0.844537	OK	0.22398	0.157451	1.42254	0.154868	0.496215	OK
ENSG00000005238.19	583	575	583	1531	1055	1171	928	672	937	2392	1459	1885	804	738	922	1877	1729	1731	1.29121	2.8354e-32	OK	1.10937	2.6938e-26	OK	1.38046	2.13144e-38	OK	FAM214B	0.583884	0.106496	5.4827	4.18887e-08	1.66066e-06	OK	0.57961	0.113091	5.12515	2.973e-07	1.60267e-05	OK
ENSG00000005243.10	310	290	288	271	158	215	286	220	314	351	216	331	342	357	378	333	340	273	-0.254029	0.116223	OK	0.0372069	0.810655	OK	-0.0104533	0.950666	OK	COPZ2	0.433735	0.169465	2.55943	0.0104844	0.0677445	OK	0.514479	0.178064	2.8893	0.003861	0.0455535	OK
ENSG00000005249.13	101	82	85	93	68	38	70	50	54	68	27	63	65	46	50	56	45	42	-0.225492	0.458612	OK	-0.278071	0.41443	OK	0.0417366	0.899179	OK	PRKAR2B	-0.34971	0.348501	-1.00347	0.315633	0.595523	OK	-0.386509	0.337432	-1.14544	0.252025	0.613218	OK
ENSG00000005302.19	231	301	264	276	172	165	291	167	253	335	195	252	208	243	259	252	202	186	0.163238	0.344329	OK	0.391247	0.0510725	OK	0.12206	0.524182	OK	MSL3	0.423856	0.200303	2.11607	0.0343389	0.155959	OK	-0.0776654	0.195382	-0.397505	0.690995	0.906261	OK
ENSG00000005339.14	1197	1406	1320	2002	1462	1351	964	795	1250	1676	1051	1565	1151	1231	1613	1428	1509	1370	0.835838	9.76244e-08	OK	0.62808	7.98226e-06	OK	0.658296	2.2013e-05	OK	CREBBP	-0.323634	0.162192	-1.99538	0.0460014	0.189166	OK	-0.168326	0.169041	-0.995769	0.319362	0.680933	OK
ENSG00000005379.17	444	435	374	484	241	267	348	249	331	408	211	325	442	361	399	354	273	262	-0.167271	0.29536	OK	-0.293068	0.198412	OK	-0.0906216	0.614319	OK	TSPOAP1	-0.116203	0.182261	-0.637563	0.523758	0.766739	OK	-0.0738443	0.177424	-0.416203	0.677262	0.901365	OK
ENSG00000005436.14	113	131	121	98	65	68	84	58	101	67	33	85	114	108	121	59	50	51	0.0170226	0.960182	OK	-0.302279	0.429654	OK	-1.26199	0.000240159	OK	GCFC2	-0.787048	0.398532	-1.97487	0.048283	0.195756	OK	-1.08685	0.335599	-3.23854	0.00120142	0.0185492	OK
ENSG00000005448.16	154	203	190	159	112	132	141	128	241	176	138	169	169	175	247	115	174	165	-0.208301	0.312188	OK	-0.123095	0.615901	OK	-0.156124	0.516132	OK	WDR54	0.243172	0.217896	1.116	0.264421	0.539658	OK	0.164083	0.252245	0.65049	0.515376	0.821443	OK
ENSG00000005469.11	77	76	100	70	42	57	66	42	69	80	31	53	59	55	67	31	25	29	-0.0396367	0.899	OK	-0.320339	0.35238	OK	-1.02802	0.0047132	OK	CROT	-0.549843	0.370506	-1.48403	0.1378	0.380875	OK	-1.23971	0.383942	-3.2289	0.00124269	0.0190202	OK
ENSG00000005483.21	1015	1009	915	2584	1602	1593	742	528	765	2160	1169	1676	1019	700	986	2132	1956	1774	1.23678	6.6391e-41	OK	1.27355	8.64209e-25	OK	1.22863	1.53628e-21	OK	KMT2E	-0.286245	0.0979567	-2.92215	0.0034762	0.0298304	OK	-0.06169	0.100582	-0.613329	0.539659	0.837836	OK
ENSG00000005486.17	768	823	749	778	425	479	696	478	765	833	492	657	684	646	798	621	543	532	-0.144024	0.259997	OK	-0.0293423	0.810022	OK	-0.120278	0.350075	OK	RHBDD2	0.119926	0.136979	0.875508	0.381298	0.657493	OK	-0.102277	0.144722	-0.706715	0.479744	0.799138	OK
ENSG00000005700.15	807	820	842	739	424	437	681	501	857	677	333	527	959	781	1158	700	405	498	-0.397767	0.000709997	OK	-0.480094	0.000139067	OK	-0.576455	0.00053518	OK	IBTK	-0.0951424	0.135712	-0.70106	0.483266	0.737517	OK	0.0811121	0.174253	0.465485	0.641584	0.88984	OK
ENSG00000005801.18	139	128	129	99	93	91	143	95	119	160	114	103	94	90	152	101	100	83	-0.222683	0.322133	OK	0.124429	0.630489	OK	-0.0135493	0.964726	OK	ZNF195	0.421392	0.257414	1.63702	0.101626	0.316593	OK	0.0400446	0.252654	0.158496	0.874066	0.967521	OK
ENSG00000005810.18	660	741	700	767	476	495	513	328	515	594	334	408	593	542	657	438	382	425	-0.117807	0.597779	OK	-0.285009	0.206079	OK	-0.271068	0.123904	OK	MYCBP2	-0.563157	0.253719	-2.21961	0.0264451	0.130217	OK	-0.382557	0.229146	-1.66949	0.095021	0.379621	OK
ENSG00000005812.11	350	402	446	429	308	286	335	301	420	398	212	335	323	343	401	277	256	231	-0.0281839	0.863494	OK	-0.199613	0.188632	OK	-0.216108	0.171623	OK	FBXL3	-0.0637036	0.158051	-0.403056	0.686907	0.861875	OK	-0.308655	0.159912	-1.93016	0.053587	0.275349	OK
ENSG00000005882.12	404	509	403	500	307	267	340	239	362	511	268	363	438	342	418	426	339	310	-0.267895	0.116449	OK	0.377804	0.0411591	OK	-0.0608606	0.756106	OK	PDK2	0.0877949	0.191014	0.459626	0.645785	0.841126	OK	0.0202928	0.176259	0.115131	0.908341	0.97663	OK
ENSG00000005884.18	22716	24840	24781	20839	14874	16757	18589	13015	20951	21956	12297	18206	26312	25314	33303	21939	19598	22164	-0.133746	0.165268	OK	-0.0965616	0.204588	OK	-0.140222	0.128517	OK	ITGA3	-0.068801	0.0994541	-0.691787	0.489071	0.742318	OK	0.261675	0.105208	2.48723	0.0128743	0.108177	OK
ENSG00000005889.15	438	456	415	554	430	383	377	285	408	528	332	454	394	352	443	443	442	413	0.568665	0.00159887	OK	0.860699	1.02767e-06	OK	0.314472	0.0642344	OK	ZFX	0.174278	0.198476	0.878079	0.379901	0.656374	OK	-0.187972	0.19072	-0.985591	0.324334	0.685194	OK
ENSG00000005893.15	2493	2879	2500	2816	1687	1859	2028	1551	2552	2636	1424	2105	2864	2471	3171	2402	1783	2090	-0.0976705	0.313831	OK	-0.0869715	0.372494	OK	-0.206495	0.0326988	OK	LAMP2	-0.0206934	0.102479	-0.201929	0.839972	0.937243	OK	0.0650983	0.111669	0.582958	0.559922	0.847753	OK
ENSG00000006007.12	813	851	774	903	550	521	614	447	651	725	428	597	925	696	924	735	651	624	-0.0154427	0.89808	OK	-0.119345	0.338659	OK	-0.112863	0.38842	OK	GDE1	-0.260234	0.131938	-1.9724	0.0485642	0.196399	OK	0.0015338	0.138167	0.011101	0.991143	0.99839	OK
ENSG00000006015.17	137	152	139	140	84	114	97	75	106	146	74	115	112	112	141	178	113	129	-0.197213	0.367606	OK	-0.0251606	0.915783	OK	0.232995	0.341033	OK	REX1BD	-0.184114	0.239953	-0.767292	0.442908	0.707866	OK	0.244947	0.261158	0.937928	0.348281	0.70677	OK
ENSG00000006016.11	54	66	83	17	24	24	85	60	128	27	44	72	113	106	167	48	47	89	-1.6591	0.000257682	OK	-0.40045	0.201237	OK	-0.867907	0.0129315	OK	CRLF1	1.63618	0.440317	3.71592	0.000202462	0.00306652	OK	1.62113	0.471114	3.44105	0.000579453	0.010419	OK
ENSG00000006025.12	142	149	111	138	121	111	149	86	121	190	127	166	148	137	128	140	116	125	0.173627	0.477791	OK	0.05539	0.837854	OK	0.0922565	0.731881	OK	OSBPL7	0.404777	0.211301	1.91564	0.0554104	0.213749	OK	0.132232	0.238908	0.553484	0.579932	0.860111	OK
ENSG00000006042.12	291	284	262	305	149	176	152	153	252	248	112	173	306	241	325	239	199	182	-0.168432	0.362144	OK	-0.102732	0.649321	OK	-0.377388	0.0318384	OK	TMEM98	-0.249227	0.204814	-1.21684	0.223663	0.495933	OK	-0.172607	0.21027	-0.820885	0.411712	0.751848	OK
ENSG00000006062.17	328	323	291	1107	928	926	677	310	462	1754	1089	1478	670	398	483	1960	1887	1625	1.9071	3.71426e-43	OK	1.49383	1.06157e-17	OK	2.04132	5.82338e-33	OK	MAP3K14	0.450521	0.124434	3.62056	0.000293968	0.00416492	OK	0.840997	0.133891	6.28121	3.35938e-10	2.99556e-08	OK
ENSG00000006118.14	988	1241	1035	1136	883	881	891	747	985	1067	724	989	809	884	1000	859	828	862	0.126501	0.272521	OK	-0.159959	0.191943	OK	0.0888369	0.497685	OK	TMEM132A	-0.231812	0.133061	-1.74215	0.0814827	0.273952	OK	-0.236776	0.133016	-1.78005	0.0750674	0.332068	OK
ENSG00000006125.18	4036	4426	3985	4296	2519	2372	3145	2146	3456	3472	1797	2695	4008	3304	4290	2880	2420	2395	-0.111954	0.248383	OK	-0.123265	0.185221	OK	-0.303081	0.00360382	OK	AP2B1	-0.177263	0.11257	-1.57469	0.115329	0.341191	OK	-0.223333	0.113498	-1.96772	0.0491003	0.261522	OK
ENSG00000006194.10	351	367	331	484	295	389	234	182	271	429	270	459	346	266	380	513	500	500	0.412335	0.00263852	OK	0.639493	0.000223131	OK	0.926688	7.69932e-10	OK	ZNF263	-0.0856911	0.16851	-0.508523	0.611087	0.823512	OK	0.499338	0.140539	3.55301	0.000380845	0.00739134	OK
ENSG00000006282.21	765	714	563	737	440	434	582	359	577	662	402	506	615	495	563	576	479	388	-0.175242	0.231324	OK	-0.0305625	0.828838	OK	0.177464	0.21891	OK	SPATA20	-0.0126673	0.139747	-0.0906441	0.927775	0.973577	OK	0.0491121	0.150555	0.326208	0.744267	0.92613	OK
ENSG00000006283.18	25	21	22	20	10	13	27	6	22	19	16	21	31	18	14	27	11	9	-0.634772	0.258683	OK	0.358444	0.539291	OK	-0.332926	0.591267	OK	CACNA1G	0.426277	0.567928	0.750583	0.452903	0.715019	OK	0.244327	0.62919	0.38832	0.697779	0.908381	OK
ENSG00000006327.13	3869	4071	4126	4002	3023	3345	3592	2688	3795	4414	2747	3781	4215	4030	4814	4086	3281	3818	0.0157878	0.869038	OK	0.0031164	0.972658	OK	-0.0672005	0.468212	OK	TNFRSF12A	0.0235241	0.108054	0.217707	0.827657	0.932274	OK	0.075892	0.113755	0.667154	0.504674	0.815012	OK
ENSG00000006432.15	252	238	255	404	235	215	391	295	337	710	380	503	297	251	275	454	316	332	0.440098	0.00793103	OK	0.570261	6.62404e-05	OK	0.581591	0.000457608	OK	MAP3K9	0.876775	0.149049	5.88245	4.04233e-09	1.93473e-07	OK	0.343664	0.170013	2.02139	0.0432393	0.241529	OK
ENSG00000006451.8	577	633	581	944	604	672	576	380	638	976	550	769	543	486	629	738	560	635	0.638838	1.48278e-08	OK	0.520267	2.01984e-05	OK	0.462058	0.000161735	OK	RALA	0.033178	0.11847	0.280054	0.779436	0.91012	OK	-0.203744	0.125382	-1.62499	0.104164	0.399779	OK
ENSG00000006453.14	182	170	162	223	151	149	256	187	248	340	189	275	167	200	217	185	210	195	0.628635	0.00121632	OK	0.363465	0.0438883	OK	0.405683	0.0614589	OK	BAIAP2L1	0.454003	0.196177	2.31426	0.0206535	0.110236	OK	0.0938078	0.203522	0.460922	0.644855	0.89114	OK
ENSG00000006459.11	195	201	236	374	229	259	88	103	178	309	167	256	200	201	290	407	335	407	0.704647	0.000269395	OK	1.24302	3.97394e-10	OK	1.30732	1.55569e-11	OK	KDM7A	0.262932	0.186675	1.4085	0.158984	0.411999	OK	0.650477	0.207428	3.13591	0.00171322	0.0248142	OK
ENSG00000006468.14	358	375	396	477	304	301	209	127	216	275	158	176	251	208	323	251	192	268	0.224139	0.277057	OK	0.00785909	0.972115	OK	0.487744	0.0246618	OK	ETV1	-0.853347	0.217205	-3.92876	8.53865e-05	0.00146909	OK	-0.407551	0.230501	-1.76811	0.0770422	0.335641	OK
ENSG00000006530.18	192	174	196	180	105	115	161	114	176	175	94	134	177	163	205	132	118	97	-0.189151	0.352025	OK	-0.362226	0.0829139	OK	-0.456791	0.0439199	OK	AGK	-0.218678	0.227531	-0.961091	0.336506	0.616351	OK	-0.259483	0.237461	-1.09274	0.274509	0.635622	OK
ENSG00000006534.16	414	361	353	459	273	270	202	119	183	222	141	171	281	233	230	255	209	189	0.0531502	0.72807	OK	-0.0544478	0.781279	OK	-0.121456	0.542562	OK	ALDH3B1	-1.01167	0.170918	-5.91906	3.23788e-09	1.57258e-07	OK	-0.668416	0.169384	-3.94616	7.94155e-05	0.00200188	OK
ENSG00000006576.16	497	529	541	587	309	352	493	352	493	527	240	377	719	544	624	549	337	318	0.247458	0.0906061	OK	-0.120258	0.519841	OK	-0.379993	0.0242645	OK	PHTF2	-0.285456	0.194231	-1.46968	0.14165	0.385745	OK	-0.239626	0.180991	-1.32397	0.185513	0.536799	OK
ENSG00000006607.14	485	486	509	516	284	279	497	367	541	415	243	332	520	462	572	348	269	292	-0.0404484	0.836352	OK	-0.55684	3.94043e-05	OK	-0.468265	0.00394896	OK	FARP2	-0.388567	0.187882	-2.06814	0.038627	0.169221	OK	-0.4797	0.201661	-2.37874	0.0173718	0.132621	OK
ENSG00000006625.18	146	157	135	128	77	74	191	103	164	186	94	132	151	117	174	129	77	128	-0.420145	0.0548165	OK	-0.20079	0.360535	OK	-0.192109	0.430138	OK	GGCT	0.537961	0.228875	2.35046	0.0187504	0.102916	OK	0.259334	0.268874	0.964518	0.334786	0.694747	OK
ENSG00000006634.8	60	70	63	110	52	63	63	37	68	148	75	71	47	43	65	114	98	77	0.611794	0.0474458	OK	0.733899	0.0187681	OK	1.54447	4.33859e-07	OK	DBF4	0.334261	0.310681	1.0759	0.281972	0.560198	OK	0.638605	0.298659	2.13824	0.0324972	0.202555	OK
ENSG00000006638.11	40	49	29	53	37	27	41	22	47	80	35	47	29	50	50	39	38	37	0.200204	0.6025	OK	0.592572	0.091548	OK	0.0881451	0.81644	OK	TBXA2R	0.455404	0.3527	1.2912	0.196636	0.461588	OK	-0.0557674	0.376821	-0.147994	0.882347	0.970519	OK
ENSG00000006652.14	289	308	306	561	463	478	303	210	347	623	509	568	374	316	412	544	711	516	1.10659	3.68706e-12	OK	0.930703	1.81791e-08	OK	1.14165	1.32193e-10	OK	IFRD1	0.0706697	0.176179	0.401124	0.688329	0.862426	OK	0.313941	0.191863	1.63627	0.101782	0.394956	OK
ENSG00000006695.12	120	126	129	123	93	77	120	86	98	152	79	125	128	117	170	90	94	82	0.380564	0.0967172	OK	0.286654	0.29762	OK	-0.0547722	0.844831	OK	COX10	0.243765	0.243509	1.00105	0.316802	0.5967	OK	-0.177569	0.270321	-0.65688	0.511258	0.817963	OK
ENSG00000006704.10	636	760	632	513	372	446	414	322	469	416	253	366	697	669	824	537	521	505	-0.243574	0.167185	OK	-0.163038	0.323914	OK	-0.275449	0.0460002	OK	GTF2IRD1	-0.481584	0.195907	-2.45823	0.0139625	0.0834822	OK	0.0974079	0.179554	0.542498	0.587475	0.864074	OK
ENSG00000006712.15	595	730	562	636	374	408	593	364	589	606	385	437	562	494	615	471	424	434	-0.106803	0.436216	OK	-0.20968	0.146633	OK	-0.162803	0.196413	OK	PAF1	-0.0811724	0.151012	-0.537522	0.590907	0.811259	OK	-0.142646	0.144005	-0.990559	0.321901	0.683537	OK
ENSG00000006715.16	777	792	727	775	437	429	603	398	711	637	298	479	758	593	820	592	345	400	0.0472463	0.778999	OK	-0.2127	0.180849	OK	-0.395683	0.0169755	OK	VPS41	-0.159806	0.195822	-0.81608	0.414454	0.685834	OK	-0.307829	0.19893	-1.54742	0.121761	0.437529	OK
ENSG00000006744.19	583	579	523	435	229	216	437	316	476	418	225	272	456	452	527	312	214	256	-0.718794	3.70304e-05	OK	-0.531609	0.00359701	OK	-0.299312	0.176003	OK	ELAC2	0.123388	0.203586	0.606071	0.544467	0.780658	OK	0.289274	0.206149	1.40322	0.16055	0.504554	OK
ENSG00000006756.16	489	503	436	608	362	279	350	259	387	400	236	292	438	419	475	433	283	302	0.0360783	0.821972	OK	-0.185753	0.231393	OK	-0.19414	0.302627	OK	ARSD	-0.614262	0.172458	-3.56181	0.00036831	0.00499248	OK	-0.243385	0.20064	-1.21304	0.225114	0.582701	OK
ENSG00000006757.12	44	59	41	40	29	30	29	18	40	36	28	44	63	59	41	46	28	30	-0.0936974	0.801472	OK	0.0227213	0.963891	OK	-0.225198	0.582525	OK	PNPLA4	-0.368787	0.466391	-0.790725	0.429104	0.696408	OK	-0.18854	0.431133	-0.437312	0.661885	0.896253	OK
ENSG00000006831.10	1242	1073	1076	2436	1441	1467	1015	581	1060	1754	962	1407	1468	987	1348	2101	1721	1697	0.887318	4.48288e-11	OK	0.650849	2.15659e-07	OK	0.814974	2.52312e-11	OK	ADIPOR2	-0.393765	0.123499	-3.18842	0.00143054	0.0149672	OK	0.0853074	0.119161	0.715899	0.474054	0.796102	OK
ENSG00000007047.15	612	599	599	718	517	531	533	448	591	797	466	660	633	611	699	674	595	588	0.236959	0.140991	OK	0.271722	0.111901	OK	0.243011	0.111247	OK	MARK4	0.149175	0.165417	0.901813	0.367156	0.645129	OK	0.101386	0.181941	0.557245	0.57736	0.857804	OK
ENSG00000007080.11	392	529	439	459	319	360	417	348	389	501	356	453	458	525	561	502	408	456	-0.014137	0.921555	OK	0.0321129	0.842408	OK	0.00124977	0.993204	OK	CCDC124	0.127512	0.150692	0.846177	0.397454	0.671366	OK	0.218645	0.143305	1.52573	0.127076	0.447052	OK
ENSG00000007168.13	2330	2443	2432	2709	1711	1776	1788	1394	2221	2245	1196	1985	2599	2203	2776	2234	1817	1820	0.356189	0.000312964	OK	0.382747	0.000178276	OK	0.200775	0.134203	OK	PAFAH1B1	-0.117546	0.112144	-1.04817	0.294558	0.573687	OK	-0.125528	0.142561	-0.880522	0.378576	0.728797	OK
ENSG00000007202.15	2464	2630	2464	2264	1479	1538	2622	1766	2686	2798	1487	2109	2572	2236	2876	1775	1544	1634	-0.339192	0.000138281	OK	-0.246383	0.0124398	OK	-0.258194	0.00805746	OK	KIAA0100	0.221945	0.105491	2.10393	0.0353846	0.15917	OK	0.0155419	0.100433	0.15475	0.877019	0.968413	OK
ENSG00000007255.10	46	34	32	53	20	32	23	24	43	51	32	41	52	39	51	46	30	39	0.0715408	0.863346	OK	0.419157	0.30164	OK	-0.149361	0.675705	OK	TRAPPC6A	0.340346	0.387462	0.878398	0.379728	0.65627	OK	0.181918	0.402732	0.45171	0.651478	0.893569	OK
ENSG00000007341.19	88	108	78	120	81	92	94	61	78	113	61	117	84	86	120	78	71	80	0.0341989	0.888859	OK	0.472158	0.184734	OK	0.323816	0.271808	OK	ST7L	0.322891	0.322864	1.00009	0.317269	0.597035	OK	0.340713	0.292746	1.16385	0.244483	0.606581	OK
ENSG00000007372.23	403	526	399	434	360	357	294	227	373	469	365	396	393	425	448	379	392	383	0.223943	0.194178	OK	0.474942	0.00840033	OK	0.177983	0.326685	OK	PAX6	-0.0511928	0.174377	-0.293575	0.769082	0.905021	OK	0.0112118	0.150587	0.0744544	0.940649	0.985613	OK
ENSG00000007376.8	238	212	209	123	105	89	189	169	198	198	110	149	220	164	226	160	109	113	-0.726958	0.00026774	OK	-0.35013	0.0668221	OK	-0.220896	0.295908	OK	RPUSD1	0.433725	0.219089	1.97968	0.0477401	0.194236	OK	0.333133	0.239703	1.38977	0.164597	0.509604	OK
ENSG00000007384.15	818	935	935	690	499	586	528	383	615	666	416	584	823	749	935	678	546	590	-0.361865	0.0050512	OK	0.107947	0.427075	OK	-0.0996872	0.398565	OK	RHBDF1	-0.0843357	0.150999	-0.55852	0.576489	0.801157	OK	0.135042	0.145858	0.925845	0.354527	0.711084	OK
ENSG00000007392.16	255	340	362	278	252	251	216	214	288	227	174	212	279	318	353	193	232	232	-0.0531628	0.833111	OK	-0.500891	0.0231391	OK	-0.276811	0.131467	OK	LUC7L	-0.52416	0.230706	-2.27199	0.0230874	0.119027	OK	-0.34264	0.231887	-1.47761	0.139512	0.470471	OK
ENSG00000007516.13	11	12	17	4	7	10	23	9	21	9	15	18	11	9	19	8	16	7	1.35721	0.167676	OK	0.415573	0.571904	OK	-1.08003	0.164278	OK	BAIAP3	0.257402	1.00463	0.256216	0.797784	0.91831	OK	-1.22955	1.01544	-1.21085	0.225952	0.583832	OK
ENSG00000007520.4	314	352	331	300	233	242	255	183	270	323	165	263	319	343	376	311	250	292	-0.122781	0.41276	OK	-0.0778492	0.627303	OK	-0.132834	0.384174	OK	TSR3	-0.154721	0.165345	-0.935749	0.349403	0.628944	OK	0.0784751	0.165199	0.475033	0.634763	0.886761	OK
ENSG00000007541.16	598	627	637	590	422	439	483	375	519	614	379	492	597	535	607	552	450	472	-0.05888	0.655345	OK	0.0385183	0.773929	OK	-0.021346	0.863491	OK	PIGQ	-0.0459849	0.149031	-0.308559	0.757657	0.900669	OK	-0.0312637	0.145997	-0.214138	0.830439	0.953921	OK
ENSG00000007545.15	307	407	318	383	257	276	322	262	320	474	252	311	322	320	372	312	290	255	0.470808	0.00886006	OK	0.043822	0.837723	OK	0.113102	0.482097	OK	CRAMP1	-0.191149	0.175595	-1.08858	0.27634	0.554366	OK	-0.365901	0.16685	-2.193	0.0283076	0.185157	OK
ENSG00000007866.21	941	842	851	821	531	552	936	723	966	1190	689	887	972	817	1011	876	731	665	-0.231097	0.0498414	OK	-0.0351401	0.756289	OK	-0.0857317	0.483878	OK	TEAD3	0.46667	0.116924	3.99123	6.57314e-05	0.00116913	OK	0.246686	0.128405	1.92116	0.0547122	0.277972	OK
ENSG00000007923.16	541	647	563	502	383	380	478	288	520	460	276	442	586	583	696	441	361	409	-0.260266	0.0911161	OK	-0.191706	0.179975	OK	-0.405122	0.00327575	OK	DNAJC11	-0.232438	0.153919	-1.51013	0.13101	0.368373	OK	-0.0435659	0.157966	-0.275793	0.782707	0.939707	OK
ENSG00000007968.7	18	14	15	12	16	14	15	7	21	26	15	14	9	5	19	5	8	17	-0.82794	0.22556	OK	0.298803	0.608172	OK	0.142743	0.856305	OK	E2F2	0.257866	0.572458	0.450454	0.652383	0.844563	OK	-0.539293	0.705342	-0.764584	0.444519	0.775861	OK
ENSG00000008018.9	853	916	725	871	570	590	655	452	817	873	492	708	758	682	893	806	637	680	-0.0701275	0.547968	OK	-0.00562428	0.963025	OK	0.058241	0.620827	OK	PSMB1	-0.0354785	0.116007	-0.30583	0.759734	0.901102	OK	0.0592703	0.123559	0.479693	0.631446	0.884764	OK
ENSG00000008083.14	505	633	493	961	744	697	379	288	471	664	362	604	546	463	628	718	647	744	0.793438	5.3627e-10	OK	0.448647	0.00153161	OK	0.59886	2.90407e-06	OK	JARID2	-0.616609	0.13682	-4.50673	6.58353e-06	0.000154461	OK	-0.192145	0.134684	-1.42664	0.153684	0.494683	OK
ENSG00000008086.12	144	195	141	230	125	121	151	123	166	210	112	189	182	172	177	138	135	139	0.47038	0.0569479	OK	0.305274	0.263489	OK	0.00405554	0.989416	OK	CDKL5	0.120238	0.263312	0.456638	0.647931	0.842298	OK	0.0282881	0.311176	0.090907	0.927567	0.981953	OK
ENSG00000008128.23	261	345	320	283	184	208	247	168	274	311	154	226	303	243	331	260	217	236	-0.205454	0.28751	OK	-0.0378365	0.820318	OK	0.244891	0.165957	OK	CDK11A	0.0281262	0.191601	0.146796	0.883293	0.957022	OK	0.24389	0.206878	1.17891	0.238434	0.600576	OK
ENSG00000008130.15	472	630	546	453	300	299	531	378	493	540	263	382	506	488	544	415	305	357	-0.480033	0.00232873	OK	-0.244523	0.11854	OK	-0.175673	0.207865	OK	NADK	0.0107325	0.160805	0.0667423	0.946787	0.979468	OK	-0.0142567	0.148823	-0.0957961	0.923682	0.980296	OK
ENSG00000008256.16	640	647	686	599	348	381	463	356	575	547	290	442	713	720	899	560	484	512	-0.347297	0.00982772	OK	-0.170634	0.192051	OK	0.0110681	0.94439	OK	CYTH3	-0.0706489	0.143297	-0.493023	0.621997	0.829118	OK	0.584409	0.173234	3.37353	0.000742123	0.0126334	OK
ENSG00000008277.14	45	48	57	50	28	27	18	21	22	19	10	27	27	32	40	18	21	18	-1.06352	0.0040329	OK	-0.885353	0.147916	OK	0.278831	0.618476	OK	ADAM22	-0.801634	0.49074	-1.63352	0.10236	0.317975	OK	0.161626	0.540311	0.299135	0.764837	0.933471	OK
ENSG00000008282.8	544	595	575	670	380	424	594	412	616	776	452	576	623	506	639	572	459	500	-0.0171306	0.892581	OK	0.137157	0.281478	OK	0.0859193	0.49182	OK	SYPL1	0.347796	0.136079	2.55584	0.0105933	0.0682473	OK	0.206527	0.140283	1.47222	0.14096	0.473165	OK
ENSG00000008283.16	397	459	413	443	346	293	348	263	426	484	299	401	481	411	444	503	358	405	-0.0117426	0.934606	OK	0.171522	0.227365	OK	0.136332	0.381461	OK	CYB561	0.110454	0.150503	0.733899	0.46301	0.722226	OK	0.14701	0.156164	0.941378	0.346511	0.704904	OK
ENSG00000008294.21	1504	1489	1415	2744	1791	1850	1299	823	1240	1794	880	1319	1537	1210	1558	1566	1234	1349	1.03367	1.56539e-19	OK	0.445929	0.000115843	OK	0.329851	0.00338982	OK	SPAG9	-0.732953	0.115484	-6.34681	2.1983e-10	1.26349e-08	OK	-0.654009	0.127386	-5.13408	2.83533e-07	1.54856e-05	OK
ENSG00000008300.17	21	30	16	90	41	53	57	31	45	103	24	63	34	32	51	54	18	32	1.81161	9.17099e-05	OK	0.222416	0.596641	OK	0.437614	0.413006	OK	CELSR3	-0.250669	0.436468	-0.574312	0.565757	0.793952	OK	-0.591126	0.524622	-1.12676	0.259842	0.621648	OK
ENSG00000008311.15	350	342	368	359	244	240	195	109	231	202	141	147	271	253	361	242	167	187	-0.0371686	0.793985	OK	-0.158144	0.470478	OK	-0.343813	0.0487429	OK	AASS	-0.858027	0.188216	-4.55875	5.14601e-06	0.000124278	OK	-0.571111	0.169919	-3.36108	0.000776387	0.0131145	OK
ENSG00000008324.11	43	55	41	52	39	34	53	42	58	85	47	48	56	52	31	53	54	52	0.113103	0.738577	OK	0.151858	0.636383	OK	0.389997	0.293543	OK	SS18L2	0.492981	0.333008	1.48039	0.13877	0.382512	OK	0.35734	0.327554	1.09093	0.275302	0.636287	OK
ENSG00000008382.15	72	50	51	81	35	31	45	44	38	55	31	58	53	48	70	42	26	48	-0.183187	0.611756	OK	-0.0398904	0.913655	OK	-0.715062	0.0431847	OK	MPND	0.143916	0.338592	0.425043	0.670805	0.854472	OK	-0.257433	0.366322	-0.702752	0.482211	0.800107	OK
ENSG00000008394.13	843	559	532	920	361	348	655	263	415	781	252	376	597	246	399	547	286	306	-0.0515038	0.825568	OK	-0.0661255	0.80083	OK	0.114541	0.664288	OK	MGST1	-0.260989	0.251394	-1.03817	0.299191	0.5786	OK	-0.421335	0.2453	-1.71763	0.085864	0.358441	OK
ENSG00000008405.12	280	310	302	355	231	259	251	204	328	436	233	322	307	265	345	375	259	276	0.0704303	0.635751	OK	0.293427	0.114996	OK	0.458692	0.0267852	OK	CRY1	0.319785	0.186772	1.71217	0.0868653	0.286403	OK	0.357572	0.211848	1.68787	0.0914359	0.371756	OK
ENSG00000008441.16	5336	6255	6082	5736	4177	4347	3854	2971	4777	5134	3103	4725	5594	5286	6452	5104	4751	5029	-0.0612595	0.51079	OK	0.0485122	0.616637	OK	-0.0363554	0.685591	OK	NFIX	-0.217654	0.100498	-2.16576	0.0303292	0.143234	OK	0.0155004	0.103887	0.149204	0.881393	0.969968	OK
ENSG00000008513.16	1266	1411	1529	1816	1361	1496	1165	864	1419	1263	659	1137	1749	1512	2169	1700	1497	1818	0.332288	0.0206174	OK	-0.202471	0.0916131	OK	0.0989729	0.40239	OK	ST3GAL1	-0.639641	0.128657	-4.97167	6.6378e-07	2.08016e-05	OK	0.0944723	0.133286	0.708797	0.478451	0.798295	OK
ENSG00000008516.17	13	9	11	123	86	129	7	4	12	65	21	59	4	9	8	74	54	87	3.90652	3.66025e-24	OK	2.73061	1.00668e-07	OK	3.90571	4.35667e-14	OK	MMP25	-1.42284	0.301237	-4.72333	2.32009e-06	6.23204e-05	OK	-0.629867	0.353174	-1.78345	0.0745136	0.330533	OK
ENSG00000008517.16	86	82	95	196	230	179	141	100	118	136	94	156	48	42	50	63	83	71	1.35192	1.44742e-07	OK	0.0425073	0.865323	OK	0.968892	0.00335903	OK	IL32	-0.692898	0.248872	-2.78416	0.00536668	0.0415263	OK	-1.50333	0.286271	-5.25143	1.50919e-07	8.71475e-06	OK
ENSG00000008710.19	1963	2163	2229	1173	776	1011	2234	1488	2198	1869	896	1498	2160	2227	2509	1276	967	1207	-0.535581	0.000203691	OK	-0.362233	0.000182854	OK	-0.276547	0.0328837	OK	PKD1	0.472243	0.151632	3.1144	0.00184321	0.0181454	OK	0.35592	0.165337	2.15269	0.031343	0.198433	OK
ENSG00000008838.20	632	620	682	681	368	335	580	405	571	674	348	458	635	508	689	576	409	410	-0.434972	0.00558605	OK	-0.0748528	0.570915	OK	-0.25482	0.135606	OK	MED24	0.275467	0.166963	1.64987	0.0989693	0.311635	OK	0.149688	0.197171	0.759177	0.447747	0.778081	OK
ENSG00000008853.16	266	305	296	317	189	243	233	162	273	440	250	373	378	255	352	566	403	573	0.179949	0.315183	OK	0.508426	0.00233771	OK	0.839382	4.69269e-06	OK	RHOBTB2	0.320996	0.182317	1.76065	0.0782974	0.26643	OK	0.91261	0.200454	4.55273	5.29552e-06	0.000197648	OK
ENSG00000008869.12	266	268	229	243	139	130	311	190	285	290	187	243	242	199	250	160	178	160	-0.398662	0.0241698	OK	-0.60316	0.000573755	OK	-0.126303	0.519792	OK	HEATR5B	0.492605	0.184534	2.66946	0.00759736	0.0534141	OK	0.179306	0.213061	0.84157	0.400028	0.743609	OK
ENSG00000008952.17	1116	1264	1285	1262	768	781	983	792	1316	1223	723	1019	1334	1106	1460	1077	903	954	0.0288198	0.797638	OK	-0.00989227	0.925394	OK	0.207878	0.0636679	OK	SEC62	0.0842208	0.113363	0.74293	0.457524	0.719019	OK	0.392993	0.124302	3.16161	0.00156901	0.0231345	OK
ENSG00000008988.9	3047	3393	3171	3279	2363	2418	3117	2378	3565	3990	2643	3484	2867	3007	3487	3192	3103	3183	0.0128372	0.882114	OK	0.0962238	0.313517	OK	0.237758	0.022449	OK	RPS20	0.286388	0.104058	2.7522	0.00591956	0.0445983	OK	0.227002	0.10588	2.14395	0.0320367	0.201086	OK
ENSG00000009307.16	5507	6150	5441	6390	3814	3833	4618	3311	5371	5858	3067	4410	5545	4678	6193	4703	3882	4010	-0.0360448	0.689962	OK	-0.0398905	0.633831	OK	-0.14122	0.0930109	OK	CSDE1	-0.0870328	0.100728	-0.864038	0.387567	0.66266	OK	-0.118039	0.102111	-1.15599	0.247687	0.609657	OK
ENSG00000009335.18	1317	1372	1343	1222	816	873	1320	957	1415	1443	710	1036	1326	1170	1481	1092	847	868	-0.0398174	0.766113	OK	-0.0802864	0.448693	OK	-0.0807663	0.46498	OK	UBE3C	0.158562	0.134028	1.18305	0.236789	0.510671	OK	0.0613063	0.143785	0.426375	0.669834	0.899278	OK
ENSG00000009413.15	699	769	736	1000	616	669	493	390	627	810	402	592	612	583	663	663	497	585	0.442524	0.00268212	OK	0.569718	0.0131381	OK	0.282686	0.0847142	OK	REV3L	-0.177645	0.227923	-0.779405	0.435741	0.701299	OK	-0.429502	0.167786	-2.55983	0.0104725	0.0937942	OK
ENSG00000009780.15	75	82	64	112	44	38	47	35	53	49	54	74	80	64	73	99	52	67	0.312152	0.278164	OK	0.922978	0.0278442	OK	0.689912	0.0104828	OK	FAM76A	0.080858	0.399306	0.202496	0.839529	0.936986	OK	0.372241	0.289547	1.2856	0.198584	0.553324	OK
ENSG00000009830.11	574	551	481	616	371	363	601	375	545	793	376	514	550	459	569	556	409	397	0.0733422	0.668494	OK	0.212757	0.328481	OK	-0.10138	0.653781	OK	POMT2	0.219101	0.209725	1.0447	0.29616	0.57553	OK	-0.353839	0.205849	-1.71893	0.0856276	0.357796	OK
ENSG00000009844.16	483	516	554	472	276	294	430	363	511	510	278	405	509	383	505	369	305	291	-0.315351	0.0235791	OK	-0.207824	0.13872	OK	-0.30342	0.0419403	OK	VTA1	0.199452	0.146062	1.36553	0.172087	0.429061	OK	-0.0791389	0.150639	-0.525356	0.599336	0.870524	OK
ENSG00000009954.11	1123	1356	1288	1093	736	666	1094	753	1210	1133	635	911	1181	1019	1341	780	721	808	-0.323067	0.00345591	OK	-0.241236	0.0179889	OK	-0.395695	0.000338909	OK	BAZ1B	0.0295454	0.114961	0.257004	0.797176	0.918135	OK	-0.140095	0.125073	-1.12011	0.262666	0.624303	OK
ENSG00000010017.13	656	649	684	709	454	471	579	456	634	687	312	495	630	574	700	504	472	459	-0.0618028	0.656953	OK	-0.292985	0.0222737	OK	-0.168057	0.188837	OK	RANBP9	-0.213538	0.141376	-1.51043	0.130935	0.368373	OK	-0.159753	0.14301	-1.11707	0.263962	0.625416	OK
ENSG00000010072.16	104	113	97	95	49	50	128	87	118	105	30	67	129	93	99	75	50	63	-0.24876	0.376684	OK	-0.789538	0.00855799	OK	-0.773303	0.0148894	OK	SPRTN	-0.451582	0.346651	-1.3027	0.192677	0.455963	OK	-0.412652	0.306842	-1.34483	0.178679	0.528808	OK
ENSG00000010165.20	240	239	269	239	121	160	197	145	212	257	148	167	206	171	223	205	186	184	-0.276361	0.165763	OK	0.306278	0.118529	OK	0.217144	0.224122	OK	EEF1AKNMT	0.230929	0.207552	1.11263	0.265867	0.541693	OK	0.0911727	0.202432	0.450386	0.652432	0.893569	OK
ENSG00000010219.13	150	173	133	141	111	108	124	89	161	181	114	159	170	163	167	143	144	135	-0.162685	0.432916	OK	0.0813195	0.700064	OK	-0.11306	0.561131	OK	DYRK4	0.382924	0.209528	1.82755	0.0676166	0.242499	OK	0.325276	0.212421	1.53128	0.1257	0.444783	OK
ENSG00000010244.18	1380	1437	1435	1997	1320	1377	1009	788	1281	1546	922	1362	1570	1250	1720	1553	1383	1386	0.448785	9.40631e-06	OK	0.39887	0.000335711	OK	0.243012	0.0330056	OK	ZNF207	-0.352414	0.113033	-3.1178	0.00182207	0.0179641	OK	-0.104224	0.115163	-0.905015	0.365458	0.719711	OK
ENSG00000010256.11	1223	1195	988	1096	641	667	997	677	1138	1102	659	872	1065	961	1159	809	730	775	-0.304247	0.0183468	OK	0.000695258	0.995626	OK	-0.0939039	0.424407	OK	UQCRC1	0.0758639	0.132038	0.574559	0.565589	0.793952	OK	-0.000899797	0.135483	-0.00664139	0.994701	0.99845	OK
ENSG00000010270.13	457	448	393	555	310	298	442	323	507	541	274	374	497	410	482	430	341	342	0.0834263	0.585983	OK	-0.164676	0.233833	OK	-0.0782464	0.589922	OK	STARD3NL	-0.0170154	0.159794	-0.106483	0.915199	0.969092	OK	-0.0197021	0.16316	-0.120754	0.903886	0.975557	OK
ENSG00000010278.14	643	673	636	657	372	455	572	360	588	634	307	597	602	513	717	538	445	643	-0.134689	0.279604	OK	-0.0518505	0.738843	OK	0.100358	0.526319	OK	CD9	0.0104811	0.161927	0.064727	0.948391	0.980191	OK	0.203287	0.167237	1.21556	0.224151	0.5817	OK
ENSG00000010292.13	747	819	762	864	508	572	860	583	918	1154	637	944	518	550	737	543	545	541	-0.120969	0.312253	OK	0.0941052	0.420267	OK	0.0302047	0.832374	OK	NCAPD2	0.418852	0.120389	3.47916	0.000502983	0.00645879	OK	-0.206481	0.128831	-1.60272	0.108996	0.410513	OK
ENSG00000010295.19	284	238	230	208	149	149	215	131	160	237	149	163	263	238	281	208	178	156	-0.279876	0.131289	OK	0.0572554	0.776708	OK	-0.317014	0.0737173	OK	IFFO1	0.0595002	0.191953	0.309974	0.756581	0.900464	OK	0.0673914	0.195128	0.345371	0.729815	0.91888	OK
ENSG00000010318.21	17	13	10	28	16	11	12	6	11	24	6	10	25	10	13	11	8	12	0.903842	0.11502	OK	0.0262079	0.972201	OK	-0.890898	0.177427	OK	PHF7	-1.2239	0.600612	-2.03775	0.0415745	0.177281	OK	-1.67719	0.609584	-2.75137	0.00593469	0.0627354	OK
ENSG00000010322.16	1637	1505	1413	1311	808	848	1600	1114	1645	1592	802	1222	1813	1511	1886	1377	1161	1037	-0.326925	0.00236983	OK	-0.186248	0.0584459	OK	-0.198712	0.0841229	OK	NISCH	0.269207	0.108892	2.47224	0.013427	0.0811785	OK	0.331588	0.126919	2.6126	0.00898568	0.0846151	OK
ENSG00000010361.14	54	43	35	52	38	30	33	22	43	55	23	31	39	34	50	50	48	34	-0.0465862	0.905006	OK	0.0302071	0.941934	OK	0.218966	0.567795	OK	FUZ	0.111997	0.402962	0.277934	0.781063	0.910787	OK	0.195778	0.37763	0.51844	0.604151	0.872771	OK
ENSG00000010404.18	2696	3055	2991	2925	1833	2010	2286	1856	2962	2852	1633	2328	3228	2879	3708	2605	2183	2337	-0.128835	0.170758	OK	-0.0134568	0.880182	OK	-0.15006	0.088336	OK	IDS	-0.0282608	0.0966028	-0.292546	0.769869	0.905113	OK	0.142241	0.099044	1.43614	0.150962	0.490047	OK
ENSG00000010539.11	96	96	104	71	47	56	81	64	102	102	65	97	76	76	96	84	74	67	-0.65935	0.0154376	OK	0.0957365	0.706372	OK	-0.0172244	0.948503	OK	ZNF200	0.488211	0.276058	1.76851	0.0769762	0.263364	OK	0.22365	0.290078	0.770998	0.440708	0.772402	OK
ENSG00000010626.15	46	40	45	57	37	29	42	11	32	31	27	26	41	56	52	38	39	46	0.0784211	0.819488	OK	-0.29561	0.553181	OK	-0.283085	0.422607	OK	LRRC23	-0.821706	0.398632	-2.06131	0.039273	0.170938	OK	-0.109907	0.354936	-0.309653	0.756825	0.930648	OK
ENSG00000010704.18	198	212	192	211	123	136	211	174	185	236	164	186	212	184	177	163	156	127	-0.0689463	0.722546	OK	-0.0171043	0.939616	OK	-0.334117	0.0980313	OK	HFE	0.181952	0.220454	0.825351	0.409173	0.681297	OK	-0.21486	0.211751	-1.01468	0.310257	0.672778	OK
ENSG00000010803.16	402	433	422	472	335	292	409	269	408	479	255	390	482	415	601	496	403	391	0.211442	0.194584	OK	-0.0450001	0.747913	OK	0.0338787	0.831138	OK	SCMH1	-0.0334831	0.169862	-0.197119	0.843734	0.938498	OK	0.204477	0.175365	1.166	0.243613	0.606373	OK
ENSG00000010810.17	560	593	467	628	422	401	441	341	473	578	341	511	397	377	464	412	383	396	0.192612	0.242698	OK	0.170293	0.220685	OK	0.198932	0.254185	OK	FYN	0.087637	0.157055	0.558002	0.576843	0.801479	OK	-0.350177	0.166474	-2.10349	0.0354232	0.212413	OK
ENSG00000010818.10	699	722	815	3461	3089	2616	617	347	610	1442	855	1489	678	627	813	1283	1440	1474	2.21028	5.74269e-43	OK	1.21371	2.18526e-17	OK	1.07705	1.04884e-10	OK	HIVEP2	-1.34938	0.145036	-9.30375	1.35582e-20	2.05118e-18	OK	-1.13033	0.150462	-7.5124	5.80539e-14	8.01021e-12	OK
ENSG00000011007.12	786	886	782	626	387	392	762	584	818	776	483	644	740	663	872	489	533	543	-0.46574	9.31808e-05	OK	-0.172025	0.185265	OK	-0.23996	0.0969734	OK	ELOA	0.439772	0.129066	3.40734	0.000656003	0.00805014	OK	0.192964	0.158319	1.21883	0.22291	0.580203	OK
ENSG00000011009.11	763	811	717	649	441	434	783	573	782	858	440	635	851	760	880	694	559	566	-0.245075	0.0303252	OK	-0.225198	0.0686078	OK	-0.116927	0.346775	OK	LYPLA2	0.216788	0.126702	1.711	0.0870807	0.286826	OK	0.273781	0.134732	2.03204	0.0421498	0.238146	OK
ENSG00000011021.23	249	176	213	641	300	360	175	99	140	443	208	313	238	178	220	513	402	377	1.64776	1.3259e-14	OK	1.22769	5.21918e-11	OK	1.42449	3.12204e-14	OK	CLCN6	-0.487042	0.195101	-2.49636	0.0125475	0.0767071	OK	-0.113815	0.207021	-0.549778	0.582472	0.861197	OK
ENSG00000011028.14	7149	9132	9649	6635	4971	6177	7436	6404	9637	8260	5070	8138	9936	11519	13618	7878	7208	8619	-0.291013	0.0341993	OK	-0.270043	0.0257478	OK	-0.375341	0.0011625	OK	MRC2	0.179313	0.128981	1.39023	0.164459	0.41939	OK	0.394484	0.127774	3.08737	0.00201936	0.0280401	OK
ENSG00000011052.21	98	117	92	88	79	80	93	77	101	134	49	99	100	54	79	52	61	106	-0.0260545	0.917774	OK	-0.0877744	0.742984	OK	0.149924	0.673797	OK	NME1-NME2	0.0440026	0.281381	0.156381	0.875733	0.953744	OK	-0.20323	0.338477	-0.600425	0.548223	0.842903	OK
ENSG00000011105.14	861	948	939	916	607	637	521	434	620	605	439	571	726	743	931	740	641	657	-0.268216	0.0270167	OK	0.0225616	0.879342	OK	-0.206989	0.169348	OK	TSPAN9	-0.33235	0.145103	-2.29045	0.0219954	0.115203	OK	-0.106476	0.12005	-0.886934	0.375115	0.726221	OK
ENSG00000011114.15	621	773	736	776	419	483	552	364	634	781	418	574	660	629	785	665	495	566	-0.103556	0.436953	OK	-0.107262	0.50447	OK	-0.17847	0.147491	OK	BTBD7	-0.0366538	0.150008	-0.244345	0.806963	0.922412	OK	-0.0735388	0.149726	-0.491156	0.623316	0.881542	OK
ENSG00000011132.12	111	116	102	122	81	79	111	78	111	105	59	87	102	101	102	69	61	59	-0.024479	0.921675	OK	-0.351951	0.202357	OK	-0.921151	0.0014117	OK	APBA3	-0.039901	0.285165	-0.139923	0.888721	0.960137	OK	-0.757738	0.290831	-2.60543	0.00917595	0.0860976	OK
ENSG00000011143.16	50	57	45	67	40	30	37	37	40	57	37	47	41	65	49	52	38	46	0.129155	0.712831	OK	0.499109	0.177369	OK	-0.132159	0.724384	OK	MKS1	0.0386525	0.362305	0.106685	0.915039	0.969092	OK	-0.194271	0.372308	-0.521803	0.601807	0.871849	OK
ENSG00000011198.10	294	334	309	332	186	188	321	233	350	414	211	264	290	276	396	217	171	211	-0.086279	0.595667	OK	0.0655052	0.693463	OK	-0.262042	0.129996	OK	ABHD5	0.423729	0.181541	2.33407	0.019592	0.106207	OK	-0.138693	0.188348	-0.736365	0.461509	0.787989	OK
ENSG00000011201.12	573	707	741	635	392	407	549	555	878	668	407	669	809	785	997	698	591	568	-0.297622	0.0207721	OK	-0.146268	0.364784	OK	-0.16473	0.172088	OK	ANOS1	0.386427	0.145739	2.6515	0.00801348	0.0554146	OK	0.580028	0.12829	4.52121	6.14867e-06	0.000224503	OK
ENSG00000011243.18	305	375	294	529	353	349	315	229	321	472	316	431	386	312	360	464	417	389	0.417642	0.00442436	OK	0.210725	0.21732	OK	0.31689	0.0423993	OK	AKAP8L	-0.0980896	0.157015	-0.624715	0.532158	0.773525	OK	0.0660042	0.140257	0.470594	0.637931	0.888433	OK
ENSG00000011258.16	91	115	124	200	137	153	96	78	125	177	89	140	119	121	137	169	137	158	0.744828	0.000633367	OK	0.302382	0.18046	OK	0.56248	0.00719677	OK	MBTD1	-0.32089	0.200125	-1.60345	0.108835	0.330625	OK	-0.043525	0.19932	-0.218368	0.827142	0.953471	OK
ENSG00000011260.14	269	270	231	299	205	169	172	166	209	267	123	248	236	219	273	227	221	210	0.0529276	0.760361	OK	0.103928	0.614017	OK	0.0806903	0.625597	OK	UTP18	-0.138573	0.199557	-0.694405	0.487428	0.740567	OK	-0.0305791	0.182546	-0.167515	0.866965	0.965731	OK
ENSG00000011275.18	828	843	838	807	540	538	765	596	896	922	468	709	857	743	923	733	613	683	-0.151768	0.162651	OK	-0.234947	0.0420958	OK	-0.0988936	0.395217	OK	RNF216	0.0864798	0.123	0.703087	0.482002	0.737001	OK	0.103054	0.126477	0.814803	0.415185	0.754957	OK
ENSG00000011295.16	532	430	360	509	263	327	453	263	376	493	229	282	453	320	423	364	292	272	0.000268415	0.998676	OK	-0.240674	0.200982	OK	-0.0818083	0.630462	OK	TTC19	-0.219696	0.17609	-1.24764	0.212164	0.48054	OK	-0.216577	0.163403	-1.32542	0.185033	0.535883	OK
ENSG00000011304.20	2700	3074	3115	2650	1860	1974	2606	1888	2818	3079	1728	2562	2547	2722	3221	2377	2106	2186	0.148728	0.257796	OK	0.105587	0.340559	OK	-0.0918841	0.516071	OK	PTBP1	0.113444	0.129159	0.878326	0.379767	0.65627	OK	0.000867132	0.140213	0.00618439	0.995066	0.99845	OK
ENSG00000011332.19	23	19	18	13	10	9	21	12	37	30	21	15	26	12	15	18	11	11	-0.605593	0.307319	OK	0.0821117	0.875678	OK	0.166898	0.799176	OK	DPF1	0.993713	0.580716	1.71119	0.0870467	0.286786	OK	0.814749	0.664543	1.22603	0.220188	0.577592	OK
ENSG00000011376.12	302	322	293	268	163	170	257	179	233	287	158	204	319	253	338	255	206	174	-0.355588	0.0249774	OK	-0.201269	0.259131	OK	-0.366962	0.0355855	OK	LARS2	-0.0336102	0.179371	-0.187378	0.851364	0.942269	OK	-0.0395186	0.187258	-0.211038	0.832858	0.954723	OK
ENSG00000011405.13	881	750	825	1147	538	607	638	435	661	680	345	538	861	578	787	780	442	518	0.28781	0.044225	OK	-0.0826133	0.532342	OK	-0.0402317	0.84394	OK	PIK3C2A	-0.639552	0.13093	-4.8847	1.03585e-06	3.02974e-05	OK	-0.332196	0.196657	-1.68922	0.091178	0.371399	OK
ENSG00000011422.12	1267	1187	1236	1960	1334	1561	1545	1033	1405	2262	1082	1782	1385	967	1299	1679	1134	1506	0.667816	2.89607e-09	OK	0.242925	0.0418615	OK	0.477916	0.00101683	OK	PLAUR	-0.0438616	0.122215	-0.358889	0.719678	0.879762	OK	-0.194797	0.139655	-1.39484	0.163063	0.50867	OK
ENSG00000011426.11	480	452	450	472	260	313	961	401	761	1063	395	498	271	248	389	168	184	220	-0.356957	0.0630313	OK	-0.150385	0.495294	OK	-0.574377	0.00867697	OK	ANLN	0.813703	0.20947	3.88458	0.000102509	0.00171439	OK	-0.916302	0.210963	-4.34342	1.40284e-05	0.000463185	OK
ENSG00000011451.19	993	1097	1040	1040	744	689	583	531	806	752	480	744	958	954	1093	904	768	841	-0.271651	0.0381125	OK	-0.155812	0.32983	OK	-0.0367026	0.783714	OK	WIZ	-0.382359	0.136033	-2.81079	0.00494196	0.0391907	OK	0.210633	0.133971	1.57222	0.115899	0.425883	OK
ENSG00000011454.17	700	788	709	792	508	469	562	407	614	610	318	437	696	626	734	560	432	403	-0.0214836	0.848053	OK	-0.410736	0.0026129	OK	-0.339773	0.0199423	OK	RABGAP1	-0.354431	0.126845	-2.79421	0.00520266	0.0406394	OK	-0.318017	0.145204	-2.19014	0.0285138	0.186135	OK
ENSG00000011465.17	305	493	463	288	263	275	197	367	706	211	273	602	875	1184	1184	764	898	832	-0.276275	0.206379	OK	-0.1964	0.747845	OK	-0.183831	0.292705	OK	DCN	0.274092	0.495634	0.553013	0.580255	0.803843	OK	1.58557	0.183166	8.65643	4.86767e-18	9.24717e-16	OK
ENSG00000011478.12	131	98	94	135	77	88	121	90	113	143	81	121	115	99	95	100	80	90	0.190212	0.458161	OK	-0.0926421	0.689134	OK	-0.00267876	0.991448	OK	QPCTL	0.0236744	0.24283	0.0974939	0.922334	0.971181	OK	-0.172548	0.255865	-0.67437	0.500076	0.812917	OK
ENSG00000011485.15	509	577	545	496	326	336	455	306	494	553	301	475	528	464	563	421	381	414	-0.38149	0.00727642	OK	0.030061	0.842527	OK	-0.138743	0.390495	OK	PPP5C	0.198636	0.135893	1.4617	0.143823	0.388867	OK	0.248151	0.141009	1.75982	0.0784376	0.338879	OK
ENSG00000011523.14	255	250	171	193	124	126	171	111	177	167	98	129	158	153	146	124	103	98	-0.377801	0.0657893	OK	-0.276273	0.171818	OK	-0.352815	0.14258	OK	CEP68	-0.193058	0.202725	-0.952314	0.340938	0.620861	OK	-0.410783	0.212687	-1.9314	0.0534335	0.27504	OK
ENSG00000011566.15	241	315	297	394	254	256	331	250	378	354	197	304	311	283	339	306	281	245	0.2951	0.141904	OK	-0.373037	0.0269019	OK	-0.0972295	0.543784	OK	MAP4K3	-0.226243	0.176659	-1.28068	0.200307	0.466122	OK	-0.22991	0.182925	-1.25685	0.208808	0.565412	OK
ENSG00000011638.10	49	35	45	98	69	62	41	29	55	108	55	72	23	39	42	81	51	48	1.32174	3.11983e-05	OK	0.907091	0.00770412	OK	0.794306	0.0278761	OK	TMEM159	-0.0172249	0.301354	-0.0571584	0.954419	0.982634	OK	-0.458494	0.296061	-1.54865	0.121466	0.43719	OK
ENSG00000012048.22	84	97	98	66	52	57	126	60	116	136	67	98	43	47	75	44	37	51	-0.94949	0.00477043	OK	0.0995104	0.768402	OK	0.307884	0.463672	OK	BRCA1	1.01303	0.326115	3.10636	0.00189404	0.0185714	OK	0.415351	0.41908	0.991101	0.321636	0.683505	OK
ENSG00000012061.15	823	871	915	847	565	731	594	509	776	755	482	753	888	905	1111	770	764	843	0.044984	0.775132	OK	-0.106234	0.452707	OK	-0.0671533	0.616638	OK	ERCC1	-0.105486	0.170499	-0.618691	0.53612	0.775142	OK	0.15517	0.175054	0.886414	0.375394	0.72624	OK
ENSG00000012171.20	337	494	437	414	371	359	162	153	217	241	162	213	283	340	397	288	267	291	0.186225	0.254056	OK	0.0830687	0.671009	OK	-0.0601261	0.716373	OK	SEMA3B	-1.0325	0.167277	-6.17244	6.72451e-10	3.54032e-08	OK	-0.525304	0.158008	-3.32455	0.000885628	0.0145656	OK
ENSG00000012174.12	407	436	421	446	207	202	380	250	436	446	169	293	478	351	479	278	208	253	-0.34378	0.0572347	OK	-0.348762	0.0532869	OK	-0.566839	0.00043614	OK	MBTPS2	0.029728	0.217111	0.136925	0.89109	0.961118	OK	-0.120853	0.207567	-0.582239	0.560406	0.847901	OK
ENSG00000012211.13	32	33	25	42	13	17	43	23	26	36	12	21	42	34	33	25	27	24	-0.373536	0.430416	OK	-0.573569	0.242404	OK	-0.152293	0.745071	OK	PRICKLE3	-0.0581601	0.526092	-0.110551	0.911972	0.968249	OK	0.535135	0.507558	1.05433	0.291731	0.653119	OK
ENSG00000012232.9	942	1018	873	875	551	557	669	453	678	744	400	566	917	709	925	679	506	567	-0.110806	0.425982	OK	0.0194789	0.887182	OK	-0.385323	0.0126105	OK	EXTL3	-0.261111	0.126126	-2.07024	0.0384298	0.168548	OK	-0.329493	0.155212	-2.12286	0.0337659	0.206852	OK
ENSG00000012660.14	1764	1379	1312	7195	3786	3326	1490	801	1335	3625	1806	2389	2032	1262	1591	4545	3014	2782	1.89401	1.42391e-33	OK	1.03631	6.08085e-13	OK	1.30514	8.60157e-16	OK	ELOVL5	-0.866226	0.144695	-5.98659	2.1429e-09	1.07652e-07	OK	-0.39593	0.162097	-2.44256	0.0145836	0.117559	OK
ENSG00000012822.16	1361	1670	1487	1525	1020	1064	984	752	1217	1349	757	1100	1501	1400	1658	1372	1180	1196	0.075507	0.536489	OK	0.000287806	0.998016	OK	0.0557916	0.671587	OK	CALCOCO1	-0.338907	0.12711	-2.66625	0.00767033	0.0537577	OK	0.0220119	0.140111	0.157104	0.875163	0.967907	OK
ENSG00000012963.15	373	417	358	251	170	200	280	207	409	264	148	253	357	286	421	201	159	216	-0.537908	0.001058	OK	-0.498828	0.00596066	OK	-0.603744	0.00138554	OK	UBR7	-0.069324	0.191343	-0.362303	0.717126	0.878445	OK	-0.164934	0.214631	-0.768456	0.442216	0.7739	OK
ENSG00000012983.11	1090	1274	1322	1563	1091	1127	862	707	1144	1044	599	957	1105	1063	1360	1083	798	990	0.385394	0.000239694	OK	-0.229329	0.0427096	OK	-0.00797725	0.949127	OK	MAP4K5	-0.694451	0.109675	-6.3319	2.4216e-10	1.38579e-08	OK	-0.36155	0.124052	-2.9145	0.0035626	0.0424918	OK
ENSG00000013016.16	633	722	672	580	433	438	180	146	253	227	189	271	702	633	816	644	528	581	-0.215035	0.0758169	OK	0.203546	0.334812	OK	-0.0673355	0.569356	OK	EHD3	-1.12682	0.180727	-6.23492	4.52007e-10	2.41842e-08	OK	0.251774	0.134144	1.87689	0.0605332	0.294532	OK
ENSG00000013275.8	646	658	663	635	410	426	597	394	641	658	365	500	720	559	714	632	481	504	-0.0909433	0.453322	OK	-0.145887	0.256314	OK	-0.0517308	0.702008	OK	PSMC4	-0.0234603	0.13231	-0.177314	0.859262	0.945639	OK	0.122365	0.14173	0.863369	0.387935	0.733909	OK
ENSG00000013288.9	1616	1797	1764	1648	1100	1149	1454	1190	1841	1850	989	1458	1833	1700	1987	1643	1268	1347	-0.183869	0.0926237	OK	-0.141797	0.188276	OK	-0.197827	0.078105	OK	MAN2B2	0.0321973	0.107741	0.298838	0.765064	0.902603	OK	0.0779285	0.114956	0.6779	0.497835	0.811326	OK
ENSG00000013293.6	18	17	14	18	9	20	44	39	35	75	27	37	24	17	14	17	13	8	0.206899	0.717133	OK	0.0149231	0.972068	OK	-0.319953	0.592441	OK	SLC7A14	1.70045	0.507277	3.35211	0.000801971	0.00944145	OK	-0.30534	0.621733	-0.491111	0.623348	0.881542	OK
ENSG00000013297.11	45	37	27	42	25	27	95	45	61	127	42	38	43	25	38	35	25	17	0.0640966	0.873185	OK	-0.0184074	0.963171	OK	-0.239883	0.579943	OK	CLDN11	1.09058	0.416082	2.62106	0.00876566	0.0592293	OK	-0.280624	0.431854	-0.649812	0.515814	0.821542	OK
ENSG00000013306.16	948	893	958	915	645	642	998	686	941	1245	622	904	1075	856	1035	1017	716	841	-0.0839209	0.44564	OK	0.0182412	0.877766	OK	0.0596264	0.620162	OK	SLC25A39	0.283338	0.116486	2.43238	0.0149999	0.0884138	OK	0.263624	0.123111	2.14136	0.032245	0.201671	OK
ENSG00000013364.19	2218	2344	1927	2249	1339	1387	1708	1112	1699	2107	1074	1403	1984	1645	1976	1693	1236	1384	-0.1105	0.452535	OK	-0.160824	0.13527	OK	-0.205066	0.0696151	OK	MVP	-0.236974	0.125782	-1.884	0.0595643	0.224509	OK	-0.299991	0.129696	-2.31303	0.0207209	0.150476	OK
ENSG00000013374.16	576	642	589	590	366	406	476	366	561	609	282	410	523	437	619	460	369	353	-0.175371	0.197408	OK	-0.234356	0.178579	OK	0.098376	0.513251	OK	NUB1	-0.192431	0.161572	-1.19099	0.233658	0.507325	OK	-0.0403062	0.151379	-0.266261	0.790038	0.942672	OK
ENSG00000013375.16	904	1033	923	854	602	595	1091	829	1222	1084	578	758	1127	970	1275	751	634	579	0.132173	0.26267	OK	-0.306182	0.00662674	OK	-0.502444	9.42327e-05	OK	PGM3	0.0920872	0.123987	0.742715	0.457654	0.719019	OK	-0.234205	0.130198	-1.79884	0.0720442	0.323964	OK
ENSG00000013392.8	113	141	111	108	72	76	94	75	110	102	66	88	103	111	133	73	93	70	-0.250414	0.277314	OK	-0.183908	0.453703	OK	-0.312152	0.231337	OK	RWDD2A	-0.0295864	0.249686	-0.118494	0.905676	0.96615	OK	-0.0901643	0.27184	-0.331681	0.74013	0.924404	OK
ENSG00000013441.16	276	337	311	858	704	659	175	144	210	480	326	409	222	218	302	556	656	567	1.62254	1.74696e-27	OK	1.19876	5.32725e-13	OK	1.5269	1.1974e-18	OK	CLK1	-0.844986	0.153091	-5.51949	3.39989e-08	1.38973e-06	OK	-0.376741	0.171935	-2.19118	0.0284387	0.185922	OK
ENSG00000013503.10	129	173	137	117	67	87	132	75	139	123	67	97	120	129	133	86	81	95	-0.178825	0.53782	OK	-0.321471	0.17081	OK	-0.310189	0.193117	OK	POLR3B	-0.393319	0.293099	-1.34193	0.179617	0.438044	OK	-0.457569	0.303612	-1.50709	0.131788	0.455766	OK
ENSG00000013523.10	137	161	133	181	126	106	131	85	164	182	89	144	140	112	154	154	128	128	-0.0643349	0.758238	OK	-0.261352	0.217129	OK	0.137539	0.538204	OK	ANGEL1	-0.00723069	0.212857	-0.0339696	0.972901	0.990152	OK	0.169453	0.22251	0.761553	0.446327	0.776568	OK
ENSG00000013561.18	427	436	345	463	260	305	352	255	447	462	306	329	454	389	473	458	305	302	-0.162009	0.326522	OK	-0.0807782	0.646929	OK	-0.0991978	0.538164	OK	RNF14	0.233792	0.182288	1.28254	0.199652	0.465678	OK	0.220376	0.17516	1.25814	0.208342	0.565058	OK
ENSG00000013563.14	413	470	441	482	281	294	475	353	541	605	358	507	557	519	624	491	414	433	-0.0577026	0.679235	OK	0.00252531	0.984003	OK	-0.127414	0.33502	OK	DNASE1L1	0.413367	0.139689	2.95918	0.00308457	0.0270841	OK	0.292367	0.145117	2.0147	0.0439357	0.244029	OK
ENSG00000013573.17	144	128	154	127	99	97	149	94	103	177	77	111	99	80	118	101	96	114	-0.245224	0.264143	OK	-0.232634	0.469641	OK	0.254768	0.290815	OK	DDX11	0.0142746	0.258589	0.0552018	0.955978	0.983475	OK	-0.243438	0.236572	-1.02902	0.303468	0.665417	OK
ENSG00000013583.10	307	366	282	406	259	297	272	204	295	386	238	299	289	256	387	352	300	348	0.272708	0.0705749	OK	0.194809	0.215323	OK	0.331696	0.0484365	OK	HEBP1	-0.0952819	0.157873	-0.603536	0.546152	0.781718	OK	0.060723	0.156795	0.387277	0.698552	0.909025	OK
ENSG00000013588.8	1800	2017	1622	3856	3103	3432	2255	1630	2385	3897	2665	3389	1722	1694	2149	2204	2426	2352	0.921168	2.15428e-12	OK	0.33597	0.00293436	OK	0.227839	0.0651541	OK	GPRC5A	-0.0706215	0.139846	-0.504993	0.613563	0.824754	OK	-0.631085	0.154025	-4.09727	4.18046e-05	0.00119397	OK
ENSG00000013619.14	537	591	582	390	223	277	564	466	660	444	235	391	1046	824	1100	693	500	619	-0.741646	7.03183e-08	OK	-0.793348	9.14439e-09	OK	-0.527096	5.28986e-05	OK	MAMLD1	0.18666	0.16205	1.15187	0.249375	0.523557	OK	1.01964	0.157574	6.47085	9.74537e-11	9.75132e-09	OK
ENSG00000013810.19	243	240	232	282	184	217	353	195	312	455	223	266	143	134	229	152	173	213	0.299035	0.0836223	OK	0.172734	0.325301	OK	0.329495	0.178394	OK	TACC3	0.345621	0.184462	1.87367	0.0609755	0.227806	OK	-0.420132	0.219186	-1.91678	0.0552656	0.279115	OK
ENSG00000014123.10	424	470	385	355	229	236	365	246	444	403	213	344	439	353	488	324	274	251	-0.417399	0.00457669	OK	-0.199113	0.175409	OK	-0.316915	0.0264667	OK	UFL1	0.217729	0.15422	1.4118	0.158008	0.410437	OK	0.135767	0.155514	0.873018	0.382653	0.730364	OK
ENSG00000014138.9	38	66	96	32	33	33	142	41	81	123	31	68	34	66	49	28	51	54	-0.431369	0.288928	OK	0.300967	0.448406	OK	-0.117054	0.825925	OK	POLA2	1.43532	0.392215	3.65954	0.000252673	0.00367479	OK	0.461435	0.47427	0.972936	0.330585	0.690913	OK
ENSG00000014164.7	209	288	217	191	118	138	216	150	249	225	136	128	248	219	267	181	134	147	-0.399547	0.0380123	OK	-0.435902	0.0374442	OK	-0.439959	0.012931	OK	ZC3H3	0.0262422	0.223829	0.117242	0.906668	0.96615	OK	0.043926	0.202235	0.217203	0.82805	0.953921	OK
ENSG00000014216.15	1905	1907	1691	1737	1073	998	1294	956	1486	1456	786	1194	1620	1493	1719	1352	991	1150	-0.239097	0.0375927	OK	-0.00620994	0.953626	OK	-0.295957	0.00876567	OK	CAPN1	-0.14324	0.131337	-1.09063	0.275436	0.553479	OK	-0.288823	0.13067	-2.21032	0.0270831	0.180205	OK
ENSG00000014641.19	855	779	741	766	458	476	700	472	760	754	464	644	720	576	683	657	522	506	-0.219262	0.0717504	OK	-0.104601	0.366278	OK	-0.0144919	0.91466	OK	MDH1	0.0998609	0.124516	0.801992	0.422558	0.690124	OK	-0.0154171	0.134914	-0.114274	0.909021	0.976715	OK
ENSG00000014824.14	821	873	847	775	478	567	667	474	784	649	350	599	855	750	918	657	505	552	-0.224211	0.0721992	OK	-0.22434	0.172258	OK	-0.0921926	0.513896	OK	SLC30A9	-0.156384	0.170609	-0.91662	0.359342	0.638084	OK	0.325504	0.139282	2.33702	0.0194382	0.143572	OK
ENSG00000014914.21	185	193	160	220	146	168	97	71	114	155	126	142	200	189	230	213	165	192	0.472937	0.0215995	OK	0.551937	0.0770092	OK	0.100595	0.604813	OK	MTMR11	-0.0451444	0.289908	-0.155719	0.876254	0.953792	OK	0.0147215	0.199721	0.07371	0.941241	0.98584	OK
ENSG00000014919.12	367	410	345	391	220	241	331	229	360	378	234	287	334	275	383	295	246	270	-0.18966	0.191453	OK	-0.122083	0.421075	OK	-0.194307	0.250163	OK	COX15	0.0389456	0.161136	0.241694	0.809018	0.923437	OK	-0.0505955	0.162712	-0.310951	0.755838	0.930384	OK
ENSG00000015133.19	14	9	10	18	12	11	14	12	13	34	19	23	12	5	11	15	8	18	-0.0829304	0.918942	OK	-0.0817464	0.906006	OK	-0.155776	0.852491	OK	CCDC88C	1.68085	0.675065	2.48991	0.0127775	0.0778598	OK	0.421241	0.746416	0.564351	0.572515	0.854905	OK
ENSG00000015153.14	96	112	132	115	70	66	90	70	104	78	38	81	105	80	117	70	54	81	-0.299158	0.236799	OK	-0.629744	0.0308301	OK	-0.244905	0.353941	OK	YAF2	-0.329889	0.303519	-1.08688	0.277089	0.555346	OK	0.0463625	0.284792	0.162794	0.87068	0.967356	OK
ENSG00000015171.19	831	960	1017	900	612	621	729	553	894	853	474	706	1028	824	1199	851	627	706	-0.112051	0.342354	OK	-0.128349	0.261043	OK	-0.232877	0.0704628	OK	ZMYND11	-0.110345	0.120014	-0.919433	0.357869	0.636569	OK	0.075096	0.126047	0.595779	0.551323	0.843969	OK
ENSG00000015475.18	437	440	398	297	237	245	337	259	416	338	198	268	315	237	286	211	187	189	-0.494077	0.00417108	OK	-0.45295	0.00380522	OK	-0.291943	0.1483	OK	BID	-0.00899206	0.185263	-0.0485368	0.961288	0.985012	OK	-0.423429	0.199478	-2.12269	0.0337801	0.206852	OK
ENSG00000015479.19	2403	2527	2454	3005	1819	1783	2003	1542	2500	2522	1218	2078	2307	2015	2436	2165	1647	1657	0.0671766	0.461025	OK	-0.251675	0.0652795	OK	0.0176999	0.878047	OK	MATR3	-0.334854	0.145358	-2.30365	0.0212422	0.11233	OK	-0.196144	0.118308	-1.65792	0.0973343	0.385456	OK
ENSG00000015532.10	729	881	802	778	544	617	758	499	799	919	557	783	986	814	1012	801	704	758	-0.0700082	0.559955	OK	0.0234209	0.841848	OK	-0.102269	0.373122	OK	XYLT2	0.145459	0.125118	1.16258	0.245002	0.51856	OK	0.208139	0.128257	1.62282	0.104627	0.40052	OK
ENSG00000015568.13	144	216	143	274	108	147	238	136	204	159	159	126	261	217	329	198	182	137	0.318788	0.208571	OK	-0.1473	0.565597	OK	-0.103129	0.64593	OK	RGPD5	-0.0596879	0.26862	-0.222202	0.824157	0.930481	OK	0.144796	0.249428	0.580512	0.56157	0.848142	OK
ENSG00000015676.18	838	870	814	809	493	511	581	429	684	712	373	610	811	731	947	728	580	623	-0.293443	0.033862	OK	-0.00957275	0.96274	OK	-0.100661	0.416907	OK	NUDCD3	-0.23359	0.182339	-1.28108	0.200166	0.466111	OK	0.0969946	0.125799	0.771027	0.440691	0.772402	OK
ENSG00000016864.18	748	902	904	763	604	555	658	573	913	843	511	740	870	857	1042	766	746	780	0.00854767	0.953854	OK	-0.0937459	0.441488	OK	-0.0382592	0.737493	OK	GLT8D1	-0.00684784	0.134052	-0.0510834	0.959259	0.984552	OK	0.139034	0.138212	1.00595	0.314442	0.676019	OK
ENSG00000017260.19	1348	1348	1212	1484	843	812	1395	1020	1465	1544	824	1135	1388	1183	1473	1192	801	902	-0.0358755	0.795898	OK	-0.23049	0.0709485	OK	-0.189251	0.110724	OK	ATP2C1	0.170296	0.145847	1.16763	0.242955	0.516937	OK	0.00930464	0.148115	0.0628203	0.94991	0.987394	OK
ENSG00000017797.13	874	928	901	1122	609	675	788	619	942	1286	693	963	1051	866	1153	1070	936	892	0.17136	0.203338	OK	0.284653	0.0118119	OK	0.212398	0.0851122	OK	RALBP1	0.197484	0.142511	1.38574	0.165826	0.421349	OK	0.247985	0.151907	1.63248	0.102578	0.396337	OK
ENSG00000018189.13	355	420	331	498	307	331	257	187	286	353	174	254	348	284	374	304	257	266	0.357856	0.0309323	OK	0.0663929	0.741838	OK	-0.254933	0.0849194	OK	RUFY3	-0.49627	0.183608	-2.70288	0.00687424	0.049741	OK	-0.485328	0.148753	-3.26264	0.00110378	0.017369	OK
ENSG00000018408.14	2854	3261	3328	2899	1980	2049	2323	1759	2865	2689	1390	2232	3507	2860	4049	2843	2026	2391	-0.012609	0.900948	OK	-0.124846	0.249133	OK	-0.223251	0.0390277	OK	WWTR1	-0.224815	0.114876	-1.95702	0.0503455	0.201413	OK	0.00527642	0.112839	0.0467607	0.962704	0.991152	OK
ENSG00000018510.16	664	737	645	595	318	365	708	458	731	712	385	525	711	565	791	486	368	352	0.0733874	0.639547	OK	0.0375648	0.797729	OK	-0.188567	0.341468	OK	AGPS	0.119269	0.170928	0.697775	0.485318	0.739066	OK	-0.0829816	0.205902	-0.403016	0.686937	0.904997	OK
ENSG00000018610.14	157	166	126	137	98	121	122	98	111	160	92	112	129	111	129	143	123	98	-0.0678187	0.764339	OK	0.0251502	0.910783	OK	0.193276	0.410937	OK	CXorf56	-0.0291771	0.225886	-0.129167	0.897225	0.963944	OK	0.0515117	0.241731	0.213095	0.831253	0.954038	OK
ENSG00000018699.13	162	152	132	155	90	99	149	108	176	168	75	105	159	114	136	110	72	74	-0.187579	0.457278	OK	-0.378744	0.0913292	OK	-0.312205	0.306235	OK	TTC27	-0.134791	0.239861	-0.561954	0.574147	0.799337	OK	-0.16084	0.294818	-0.545556	0.585371	0.863109	OK
ENSG00000019144.19	4657	4623	4362	3341	2130	2292	3357	2587	3959	2954	1687	2540	5728	4921	5847	3465	2647	2902	-0.491918	9.42645e-09	OK	-0.466158	5.54711e-08	OK	-0.620412	2.67509e-07	OK	PHLDB1	-0.19989	0.0943759	-2.11801	0.0341739	0.155747	OK	0.159859	0.119441	1.33839	0.180769	0.530806	OK
ENSG00000019485.13	110	159	130	143	104	84	152	101	133	190	75	131	163	136	175	149	131	133	0.116952	0.619163	OK	-0.202542	0.351268	OK	0.0910639	0.665554	OK	PRDM11	0.00622163	0.232354	0.0267765	0.978638	0.991962	OK	0.237344	0.235958	1.00588	0.314475	0.676019	OK
ENSG00000019549.13	128	115	113	997	570	519	183	96	156	712	323	515	121	101	116	507	381	380	2.7584	1.81895e-61	OK	1.72386	8.08069e-22	OK	2.14937	6.48357e-36	OK	SNAI2	-0.461252	0.15622	-2.95258	0.00315126	0.0275228	OK	-0.646194	0.154384	-4.18563	2.84381e-05	0.000860892	OK
ENSG00000019995.6	535	668	762	1643	1180	1133	474	364	624	1019	615	956	606	565	820	1085	1036	974	1.2835	6.82044e-21	OK	0.500706	0.00171644	OK	0.808553	1.6796e-07	OK	ZRANB1	-0.635666	0.112225	-5.66422	1.47691e-08	6.41552e-07	OK	-0.247769	0.138489	-1.78909	0.0736009	0.327657	OK
ENSG00000020129.16	874	877	799	788	491	533	874	612	828	875	391	623	815	792	876	613	487	487	-0.159129	0.153075	OK	-0.339903	0.0141354	OK	-0.303806	0.0177738	OK	NCDN	-0.0776761	0.142075	-0.546725	0.584568	0.806508	OK	-0.184577	0.135599	-1.3612	0.173451	0.523148	OK
ENSG00000020181.18	141	161	184	142	130	141	229	167	247	298	181	221	255	234	287	222	188	191	0.0392679	0.860229	OK	0.000208486	0.999017	OK	-0.181157	0.269563	OK	ADGRA2	0.656037	0.206219	3.18126	0.00146634	0.0151849	OK	0.479661	0.209799	2.28629	0.0222371	0.1579	OK
ENSG00000020256.20	126	130	109	144	110	91	144	79	155	160	103	133	116	118	119	144	125	113	0.28124	0.246471	OK	-0.218723	0.380716	OK	0.346022	0.126631	OK	ZFP64	-0.120422	0.241257	-0.499142	0.617679	0.826461	OK	0.00122538	0.24744	0.00495223	0.996049	0.998563	OK
ENSG00000020426.11	282	291	283	354	246	246	215	133	262	274	172	255	255	281	362	271	275	279	0.332604	0.0273326	OK	0.030961	0.859838	OK	0.168289	0.33362	OK	MNAT1	-0.410291	0.161995	-2.53274	0.0113175	0.0713071	OK	-0.101774	0.159953	-0.636273	0.524599	0.826662	OK
ENSG00000020577.13	1051	917	1003	2251	1611	1290	752	489	740	777	329	513	874	651	778	789	429	527	1.24523	4.95198e-20	OK	-0.15757	0.222916	OK	-0.100223	0.564378	OK	SAMD4A	-1.73982	0.137593	-12.6446	1.19815e-36	5.84077e-34	OK	-1.68236	0.171572	-9.80553	1.06585e-22	2.68676e-20	OK
ENSG00000020922.12	95	129	105	110	87	91	149	82	143	151	75	107	99	77	90	90	68	100	0.31068	0.271011	OK	0.0307618	0.89386	OK	0.532512	0.0472703	OK	MRE11	0.299307	0.233054	1.28428	0.199043	0.464917	OK	-0.185291	0.263534	-0.703101	0.481993	0.800107	OK
ENSG00000021300.14	27	46	53	43	32	36	18	21	52	33	26	34	48	53	61	62	52	51	0.134075	0.732808	OK	-0.00118321	0.998004	OK	0.362047	0.239695	OK	PLEKHB1	-0.365505	0.391276	-0.934136	0.350234	0.629751	OK	0.630278	0.339337	1.85738	0.0632568	0.300969	OK
ENSG00000021355.13	77	53	43	81	25	26	87	49	66	93	42	48	39	20	52	32	35	24	-0.0454137	0.917005	OK	-0.0900715	0.775409	OK	-0.0404304	0.928117	OK	SERPINB1	0.545831	0.422903	1.29068	0.196816	0.46167	OK	-0.261024	0.490988	-0.53163	0.594982	0.868005	OK
ENSG00000021574.12	193	178	171	245	111	145	155	135	153	205	105	173	177	172	208	165	134	127	0.142962	0.449295	OK	0.0784411	0.714313	OK	-0.127966	0.532731	OK	SPAST	-0.16064	0.203994	-0.787473	0.431005	0.697904	OK	-0.169362	0.213353	-0.793812	0.427305	0.763614	OK
ENSG00000021645.18	371	371	303	476	251	267	440	375	572	627	327	463	482	486	454	429	355	327	0.154262	0.354529	OK	-0.0704427	0.608423	OK	-0.133276	0.396308	OK	NRXN3	0.475396	0.158761	2.99441	0.00274976	0.0246374	OK	0.21681	0.167073	1.2977	0.194392	0.547088	OK
ENSG00000021762.20	213	297	244	222	161	141	222	142	225	207	122	180	282	284	303	167	181	139	-0.213913	0.364821	OK	-0.215258	0.330316	OK	-0.486106	0.0634917	OK	OSBPL5	-0.121131	0.225797	-0.536459	0.591641	0.811588	OK	-0.247016	0.276241	-0.894208	0.371211	0.723974	OK
ENSG00000021776.11	540	662	586	482	292	268	435	303	500	471	238	305	549	470	669	354	309	309	-0.457075	0.029507	OK	-0.261866	0.18996	OK	-0.252463	0.0870177	OK	AQR	0.0415887	0.219077	0.189836	0.849438	0.941499	OK	0.264443	0.191409	1.38156	0.167108	0.513178	OK
ENSG00000021826.16	360	371	337	386	235	213	357	232	399	398	189	343	375	292	438	306	216	205	0.107372	0.500952	OK	-0.300553	0.15231	OK	-0.450466	0.00637012	OK	CPS1	-0.0163324	0.214455	-0.0761579	0.939293	0.977897	OK	-0.496346	0.180596	-2.74838	0.00598902	0.0629039	OK
ENSG00000022267.19	51	83	106	64	58	71	41	39	74	46	35	82	81	91	153	60	83	113	-0.317269	0.406175	OK	0.0573223	0.894736	OK	-0.0867562	0.78561	OK	FHL1	-0.184187	0.39509	-0.466189	0.64108	0.839425	OK	0.390784	0.33619	1.16239	0.245077	0.607176	OK
ENSG00000022277.12	744	788	707	748	514	471	601	443	718	668	444	552	777	621	766	637	567	626	-0.140479	0.23919	OK	-0.199355	0.138795	OK	0.0430108	0.760254	OK	RTF2	-0.121029	0.138844	-0.871696	0.383374	0.659411	OK	0.169934	0.136503	1.24491	0.213165	0.570588	OK
ENSG00000022567.9	62	79	78	141	82	101	86	58	85	127	65	105	77	83	87	110	70	93	1.15286	1.4449e-06	OK	0.38432	0.151402	OK	0.125541	0.633994	OK	SLC45A4	-0.247571	0.232648	-1.06414	0.287265	0.565846	OK	-0.545592	0.245795	-2.2197	0.0264389	0.176727	OK
ENSG00000022840.16	1419	1612	1473	1581	1121	1115	1355	1014	1587	1796	945	1406	1565	1417	1726	1391	1096	1177	0.00745252	0.950315	OK	-0.0672758	0.533305	OK	-0.144472	0.212787	OK	RNF10	-0.0815142	0.130962	-0.622427	0.533661	0.774084	OK	0.0871987	0.136408	0.639251	0.52266	0.825258	OK
ENSG00000022976.15	90	104	79	112	53	93	80	60	86	80	46	81	85	71	107	81	80	101	0.0881839	0.761933	OK	-0.158453	0.592356	OK	0.291469	0.269259	OK	ZNF839	-0.366379	0.319397	-1.1471	0.251341	0.52543	OK	-0.0174921	0.303385	-0.0576563	0.954022	0.988095	OK
ENSG00000023041.11	422	475	464	484	393	389	357	250	432	469	281	419	402	353	519	399	359	399	0.0992201	0.50153	OK	0.218376	0.119784	OK	0.0958315	0.525519	OK	ZDHHC6	-0.0495061	0.148007	-0.334485	0.738014	0.891455	OK	-0.025364	0.160418	-0.158112	0.874369	0.967554	OK
ENSG00000023171.18	46	44	62	108	80	80	60	27	56	115	61	74	44	45	64	87	50	76	1.5778	1.6717e-08	OK	1.07007	0.00227113	OK	1.06666	0.000420338	OK	GRAMD1B	0.0247669	0.264571	0.0936118	0.925418	0.971974	OK	-0.241564	0.259546	-0.930717	0.352	0.709479	OK
ENSG00000023191.17	1183	1287	1223	1174	880	964	984	804	1165	1175	738	1068	1097	1118	1324	1065	953	1010	-0.0532585	0.615424	OK	-0.0998729	0.379443	OK	-0.0287429	0.788403	OK	RNH1	-0.0935146	0.121074	-0.772377	0.439891	0.70522	OK	-0.0209586	0.119339	-0.175622	0.860591	0.964068	OK
ENSG00000023228.14	957	1049	906	868	439	447	849	565	880	803	392	597	990	769	1057	663	416	491	-0.461091	0.00876026	OK	-0.424835	0.00142379	OK	-0.594745	9.32001e-05	OK	NDUFS1	0.00845374	0.178355	0.0473983	0.962196	0.985329	OK	-0.134051	0.194377	-0.689641	0.49042	0.806173	OK
ENSG00000023287.13	675	815	766	1318	828	858	581	520	766	1071	566	824	659	626	855	840	731	755	0.649553	1.4257e-07	OK	0.309604	0.0161443	OK	0.391957	0.00102307	OK	RB1CC1	-0.299719	0.127281	-2.35479	0.0185333	0.102065	OK	-0.307206	0.115079	-2.66952	0.00759603	0.0751463	OK
ENSG00000023318.8	419	517	506	483	385	394	404	332	538	461	318	486	608	606	739	621	591	617	0.085655	0.559931	OK	-0.051488	0.737613	OK	0.146254	0.254862	OK	ERP44	-0.0244358	0.162612	-0.150271	0.880551	0.955703	OK	0.554605	0.148068	3.7456	0.000179967	0.00399831	OK
ENSG00000023330.15	147	183	176	158	121	120	186	129	182	214	140	157	130	125	149	190	160	127	-0.130017	0.524704	OK	-0.133805	0.510159	OK	0.448072	0.0485664	OK	ALAS1	0.265708	0.206327	1.2878	0.197816	0.463367	OK	0.298459	0.228634	1.3054	0.191757	0.543531	OK
ENSG00000023445.14	163	145	181	467	432	348	120	77	109	99	56	91	64	52	56	49	32	43	1.60541	9.76429e-19	OK	-0.390447	0.141863	OK	-0.24048	0.470229	OK	BIRC3	-2.21925	0.199934	-11.0999	1.25579e-28	3.51676e-26	OK	-3.34977	0.222771	-15.0369	4.21041e-51	6.13223e-48	OK
ENSG00000023516.9	778	802	877	755	429	428	564	382	637	555	292	451	731	639	841	472	340	392	-0.382456	0.00247063	OK	-0.346939	0.00705949	OK	-0.639152	7.9905e-07	OK	AKAP11	-0.312724	0.140135	-2.23159	0.0256422	0.127394	OK	-0.351445	0.148658	-2.36413	0.0180727	0.136532	OK
ENSG00000023572.9	124	147	133	154	79	110	82	81	110	113	56	96	104	114	156	80	107	92	0.184552	0.393527	OK	0.24659	0.357442	OK	0.045417	0.889045	OK	GLRX2	-0.399091	0.249989	-1.59643	0.110392	0.333289	OK	-0.366365	0.319598	-1.14633	0.251658	0.612807	OK
ENSG00000023608.5	127	137	104	140	92	81	95	75	107	98	80	113	109	92	123	116	129	113	0.0189073	0.934126	OK	0.029397	0.909241	OK	0.389812	0.0869552	OK	SNAPC1	-0.0969794	0.254332	-0.38131	0.702973	0.870172	OK	0.240521	0.234801	1.02436	0.305664	0.668108	OK
ENSG00000023697.13	215	220	226	243	176	179	151	130	219	206	138	187	202	171	230	179	165	169	0.143545	0.424861	OK	0.111435	0.570626	OK	0.0394375	0.826548	OK	DERA	-0.159215	0.187089	-0.85101	0.394764	0.668883	OK	-0.183678	0.186019	-0.987415	0.323439	0.684365	OK
ENSG00000023734.11	1594	1645	1633	1726	1083	1166	1104	904	1460	1426	801	1166	1672	1489	1910	1387	1133	1244	-0.00680293	0.942016	OK	-0.0422807	0.70657	OK	-0.221318	0.0341776	OK	STRAP	-0.256837	0.107916	-2.37998	0.0173135	0.0970669	OK	-0.103945	0.112405	-0.924736	0.355103	0.711238	OK
ENSG00000023902.14	613	632	553	685	436	481	620	490	652	726	451	537	634	617	753	517	605	570	-0.00644549	0.957553	OK	-0.164052	0.212957	OK	-0.100675	0.477316	OK	PLEKHO1	0.0648192	0.132318	0.489876	0.624222	0.829648	OK	0.0320327	0.150746	0.212495	0.831721	0.954241	OK
ENSG00000023909.10	234	283	266	385	211	219	263	180	259	323	131	212	216	204	272	217	123	184	0.369982	0.0249893	OK	-0.102006	0.575612	OK	0.0085423	0.961972	OK	GCLM	-0.301939	0.185518	-1.62755	0.103621	0.320532	OK	-0.434671	0.185706	-2.34064	0.0192509	0.142888	OK
ENSG00000024048.10	454	528	455	432	301	284	406	228	376	395	230	310	366	384	451	298	303	274	-0.238045	0.073144	OK	-0.161808	0.309002	OK	-0.220394	0.155707	OK	UBR2	-0.156635	0.147432	-1.06242	0.288047	0.566661	OK	-0.197797	0.156356	-1.26504	0.205857	0.56281	OK
ENSG00000024422.12	5355	6054	5716	4782	3416	3817	4258	3632	5607	4736	2966	4576	6392	6259	7781	5226	4448	4910	-0.251041	0.00486515	OK	-0.239427	0.0321042	OK	-0.26721	0.00306728	OK	EHD2	-0.0480616	0.109493	-0.438946	0.6607	0.848735	OK	0.254296	0.104445	2.43474	0.0149024	0.119032	OK
ENSG00000024526.17	74	56	69	101	53	66	126	62	135	189	81	108	41	48	54	37	41	41	0.443247	0.141983	OK	0.29344	0.407073	OK	-0.110018	0.757934	OK	DEPDC1	0.94041	0.345005	2.72579	0.00641483	0.0473539	OK	-0.874437	0.343213	-2.5478	0.0108406	0.0961424	OK
ENSG00000024862.17	77	68	61	132	76	90	63	30	64	123	68	103	60	55	66	78	96	95	0.775858	0.00234533	OK	0.871693	0.0021065	OK	0.83133	0.00282877	OK	CCDC28A	-0.0499559	0.237072	-0.210721	0.833105	0.934475	OK	-0.113079	0.257584	-0.438999	0.660662	0.896253	OK
ENSG00000025156.13	53	68	70	78	51	50	66	29	57	104	73	68	28	28	57	44	80	42	0.171963	0.627607	OK	0.651215	0.0447873	OK	1.04309	0.00825919	OK	HSF2	0.193371	0.320245	0.603824	0.545961	0.781718	OK	-0.111344	0.36513	-0.304943	0.760409	0.93167	OK
ENSG00000025293.17	428	460	435	496	318	334	418	276	511	583	312	472	438	382	486	433	344	319	0.147622	0.405073	OK	0.689853	9.30307e-06	OK	0.0693752	0.76037	OK	PHF20	0.451002	0.146386	3.08091	0.00206368	0.0197113	OK	-0.119042	0.221615	-0.537157	0.591159	0.866276	OK
ENSG00000025434.19	49	37	37	56	48	45	22	24	33	45	12	27	39	34	30	50	33	43	0.892457	0.0159798	OK	0.190652	0.68774	OK	0.523413	0.23005	OK	NR1H3	-1.13365	0.403044	-2.81271	0.0049126	0.0391639	OK	-0.574771	0.386668	-1.48647	0.137155	0.466482	OK
ENSG00000025770.19	188	225	219	208	138	187	240	142	219	261	153	211	180	187	228	152	141	167	-0.107765	0.579657	OK	-0.0332923	0.861799	OK	-0.0639721	0.734827	OK	NCAPH2	0.239457	0.198077	1.20891	0.226697	0.499713	OK	-0.0109634	0.211049	-0.0519471	0.958571	0.990062	OK
ENSG00000025772.8	672	552	528	674	390	357	676	383	556	776	366	492	445	332	467	297	287	264	-0.0710541	0.655016	OK	-0.0865523	0.594336	OK	-0.312768	0.0414589	OK	TOMM34	0.131986	0.160487	0.822411	0.410843	0.682681	OK	-0.723978	0.1614	-4.48562	7.27013e-06	0.000258257	OK
ENSG00000025796.14	1049	1186	1158	1202	718	799	952	761	1224	1234	698	966	1104	1053	1325	1016	830	904	0.101857	0.530413	OK	-0.0925443	0.399269	OK	0.000280444	0.998612	OK	SEC63	-0.128235	0.132562	-0.967359	0.333365	0.612899	OK	0.0542486	0.153302	0.353867	0.723439	0.916313	OK
ENSG00000025800.14	1341	1486	1265	1120	684	689	1210	801	1167	1082	567	785	1346	1045	1417	880	633	702	-0.462896	6.88244e-06	OK	-0.434635	0.000105272	OK	-0.539094	1.57408e-05	OK	KPNA6	-0.0617569	0.116589	-0.529699	0.59632	0.814595	OK	-0.157641	0.131641	-1.1975	0.23111	0.591056	OK
ENSG00000026025.16	52943	56069	54467	67671	47798	52744	62796	44354	70225	88705	50666	71844	63366	58938	73522	65899	60356	66347	0.30046	0.000205014	OK	0.15319	0.0340161	OK	0.197173	0.0237959	OK	VIM	0.250433	0.0898552	2.78707	0.00531874	0.0412836	OK	0.187195	0.102744	1.82195	0.0684628	0.314439	OK
ENSG00000026036.22	38	63	96	51	33	31	46	40	48	79	59	34	34	49	81	53	8	53	-0.549493	0.171556	OK	0.362504	0.352812	OK	-0.285844	0.603899	OK	RTEL1-TNFRSF6B	0.629899	0.396483	1.58872	0.112124	0.33645	OK	-0.01729	0.549219	-0.031481	0.974886	0.994409	OK
ENSG00000026103.22	368	341	315	375	179	204	414	260	359	484	214	235	342	250	295	272	181	185	-0.187908	0.280877	OK	-0.218398	0.271614	OK	-0.205241	0.306416	OK	FAS	0.190749	0.211134	0.90345	0.366287	0.644394	OK	-0.202175	0.208765	-0.968431	0.332829	0.693478	OK
ENSG00000026297.15	82	184	152	95	107	113	71	52	112	77	58	103	102	141	178	152	131	150	-0.0737525	0.81553	OK	0.0116566	0.972624	OK	0.207678	0.343235	OK	RNASET2	-0.535854	0.337916	-1.58576	0.112794	0.338021	OK	0.463663	0.274369	1.68993	0.0910421	0.371259	OK
ENSG00000026508.18	7703	9702	9509	12899	9433	8931	7785	5354	8120	11151	5766	8419	6541	6405	9421	6199	6178	7334	0.539083	2.38214e-06	OK	0.372702	0.000229019	OK	0.195389	0.165327	OK	CD44	-0.264677	0.111149	-2.38128	0.0172524	0.0968235	OK	-0.58741	0.129038	-4.55222	5.30823e-06	0.000197648	OK
ENSG00000026559.14	6	12	16	11	12	15	13	12	37	19	16	23	16	12	34	3	14	13	0.289178	0.690321	OK	-0.072124	0.893256	OK	-1.03137	0.145277	OK	KCNG1	0.725411	0.606182	1.19669	0.231428	0.50448	OK	-0.546056	0.775063	-0.704531	0.481102	0.80003	OK
ENSG00000026652.15	264	264	259	375	243	208	238	146	268	307	177	260	273	248	256	260	221	168	0.38306	0.0233417	OK	0.332081	0.0514877	OK	-0.101237	0.657933	OK	AGPAT4	-0.10545	0.170909	-0.616992	0.53724	0.775438	OK	-0.409079	0.178447	-2.29244	0.0218804	0.156214	OK
ENSG00000026950.17	209	261	173	273	189	169	202	121	168	262	129	163	160	141	198	200	113	122	0.174971	0.389695	OK	0.148511	0.496737	OK	-0.0246932	0.918207	OK	BTN3A1	-0.227505	0.191793	-1.1862	0.235544	0.509045	OK	-0.501803	0.226443	-2.21602	0.0266899	0.178042	OK
ENSG00000027001.10	97	102	106	139	66	65	94	60	91	91	47	62	103	84	112	70	59	64	-0.0315886	0.90476	OK	-0.371225	0.171613	OK	-0.419483	0.101197	OK	MIPEP	-0.492699	0.289137	-1.70403	0.088375	0.289712	OK	-0.466291	0.288164	-1.61814	0.105632	0.402411	OK
ENSG00000027075.15	8	3	3	5	7	14	22	11	19	31	11	18	16	15	14	9	11	7	1.70178	0.0630217	Low	0.697008	0.240701	OK	-1.32178	0.0462898	OK	PRKCH	0.644802	0.713943	0.903156	0.366443	0.644543	OK	-1.55762	0.748957	-2.07972	0.0375514	0.220037	OK
ENSG00000027697.14	205	243	246	339	182	204	200	128	242	278	146	235	229	257	242	250	214	155	0.326074	0.0608814	OK	0.132433	0.471218	OK	-0.0633786	0.766475	OK	IFNGR1	-0.171241	0.178834	-0.957539	0.338295	0.618336	OK	-0.222865	0.203474	-1.0953	0.273385	0.634636	OK
ENSG00000027847.14	262	372	352	266	213	247	344	268	405	380	300	422	327	350	454	358	318	336	-0.168599	0.389981	OK	-0.00768761	0.96584	OK	0.0557066	0.71221	OK	B4GALT7	0.494539	0.196979	2.51062	0.0120519	0.0742636	OK	0.36392	0.173297	2.09999	0.0357302	0.21308	OK
ENSG00000028116.17	132	157	109	139	80	91	105	63	100	133	66	91	108	96	133	115	102	97	-0.161394	0.484301	OK	0.0283141	0.909554	OK	0.152779	0.497099	OK	VRK2	-0.141524	0.237619	-0.595594	0.551446	0.785244	OK	0.0437078	0.230967	0.189238	0.849906	0.959897	OK
ENSG00000028203.18	761	781	691	971	637	616	781	537	831	1057	591	772	758	614	803	760	709	710	0.353735	0.000960348	OK	0.136028	0.229007	OK	0.283139	0.0488776	OK	VEZT	0.0114841	0.11649	0.0985844	0.921468	0.971177	OK	-0.000929882	0.125076	-0.00743456	0.994068	0.99845	OK
ENSG00000028277.21	23	17	23	16	12	16	27	13	14	34	8	18	26	6	9	5	4	11	-0.623055	0.273429	OK	-0.673116	0.3179	OK	-1.68558	0.0529452	OK	POU2F2	0.411825	0.604457	0.681314	0.495673	0.747656	OK	-0.810893	0.745546	-1.08765	0.276749	0.637054	OK
ENSG00000028310.18	458	482	430	344	214	244	378	280	401	332	211	295	406	352	452	312	231	255	-0.515595	0.000243559	OK	-0.372164	0.0158154	OK	-0.379436	0.0102041	OK	BRD9	0.0491107	0.16797	0.292378	0.769997	0.905113	OK	-0.0263765	0.165357	-0.159512	0.873265	0.967521	OK
ENSG00000028528.15	906	1004	957	866	620	563	745	537	834	665	427	601	825	726	1004	618	534	564	0.231377	0.187515	OK	-0.381565	0.00771343	OK	0.138597	0.294199	OK	SNX1	-0.548717	0.144438	-3.79897	0.000145298	0.00232089	OK	-0.403683	0.14877	-2.71346	0.00665846	0.0681336	OK
ENSG00000028839.10	133	130	134	215	127	114	133	100	158	228	128	176	123	122	140	199	143	143	0.402669	0.0563965	OK	0.459588	0.0221054	OK	0.632465	0.00235019	OK	TBPL1	0.275903	0.203546	1.35548	0.175264	0.432188	OK	0.131724	0.210024	0.627186	0.530537	0.829371	OK
ENSG00000029153.14	493	400	396	455	268	275	434	296	400	413	224	275	329	243	346	205	173	209	-0.0340055	0.834783	OK	-0.340671	0.0514472	OK	-0.514563	0.00533985	OK	ARNTL2	-0.170517	0.169856	-1.0039	0.315429	0.595393	OK	-0.82261	0.182489	-4.50772	6.55271e-06	0.00023597	OK
ENSG00000029363.17	1611	1741	1734	2061	1231	1453	1434	1065	1755	2148	1191	1774	1775	1382	2054	1691	1472	1667	0.190656	0.081472	OK	0.251113	0.0235021	OK	0.299214	0.0157508	OK	BCLAF1	0.0790849	0.117626	0.672344	0.501365	0.751986	OK	0.221357	0.131682	1.681	0.0927633	0.374712	OK
ENSG00000029364.12	1022	1277	1221	1070	669	727	1126	781	1313	1132	569	863	1233	1104	1560	994	709	804	-0.216377	0.0844386	OK	-0.408943	0.000176072	OK	-0.356793	0.00303078	OK	SLC39A9	-0.0366554	0.124729	-0.29388	0.768849	0.904909	OK	0.0237272	0.130728	0.181501	0.855975	0.962053	OK
ENSG00000029639.11	61	85	55	74	53	74	52	46	71	71	44	61	64	47	74	58	38	58	0.374858	0.299137	OK	-0.207506	0.563723	OK	0.336917	0.31749	OK	TFB1M	-0.215022	0.376206	-0.571553	0.567625	0.795269	OK	0.0274851	0.377633	0.0727825	0.941979	0.985959	OK
ENSG00000029725.17	973	1011	960	900	544	619	741	531	913	793	450	719	983	781	980	665	543	624	-0.330405	0.00269751	OK	-0.0497731	0.676852	OK	-0.219533	0.146033	OK	RABEP1	0.154937	0.122183	1.26808	0.204771	0.471722	OK	0.0560844	0.149739	0.374548	0.707997	0.912619	OK
ENSG00000029993.15	232	231	237	205	130	119	211	133	216	247	119	141	163	147	179	137	119	121	-0.463149	0.0210357	OK	-0.26822	0.210516	OK	-0.322615	0.124309	OK	HMGB3	0.291331	0.228012	1.2777	0.201354	0.467344	OK	-0.376375	0.231963	-1.62256	0.104683	0.40052	OK
ENSG00000030066.13	295	421	386	370	196	215	370	234	384	375	200	284	375	296	410	278	185	214	-0.338547	0.0716162	OK	-0.239019	0.119458	OK	-0.376272	0.0523783	OK	NUP160	0.183592	0.167728	1.09458	0.273699	0.551131	OK	0.0565319	0.204607	0.276295	0.782321	0.939664	OK
ENSG00000030110.13	357	338	326	358	187	180	374	239	382	428	196	267	395	318	375	325	204	233	-0.270598	0.118123	OK	-0.271781	0.100471	OK	-0.302212	0.0904191	OK	BAK1	0.223094	0.193104	1.15531	0.247965	0.522268	OK	0.0793991	0.204944	0.387419	0.698446	0.909025	OK
ENSG00000030419.16	62	70	61	134	113	103	54	37	66	187	103	109	30	36	40	79	102	70	1.12353	5.7133e-05	OK	1.21569	9.13556e-05	OK	1.41156	0.000154726	OK	IKZF2	0.0608126	0.234284	0.259568	0.795197	0.91735	OK	-0.336814	0.300451	-1.12103	0.262277	0.623936	OK
ENSG00000030582.18	5613	6138	6215	6043	4216	4582	4292	3171	4772	5927	3060	4829	6719	6329	7903	7152	5097	5908	-0.00191205	0.982574	OK	0.110441	0.223778	OK	0.0676178	0.514589	OK	GRN	-0.156932	0.104286	-1.50481	0.132372	0.371173	OK	0.302892	0.115878	2.6139	0.00895164	0.0844159	OK
ENSG00000031003.10	712	720	802	712	446	401	625	441	674	638	366	475	814	678	888	590	455	441	-0.291067	0.0327321	OK	-0.218214	0.120278	OK	-0.424448	0.00131509	OK	FAM13B	-0.0118725	0.144835	-0.0819721	0.934669	0.975728	OK	-0.0244217	0.149013	-0.163889	0.869819	0.967055	OK
ENSG00000031081.11	822	750	689	628	370	353	730	496	645	550	323	404	639	425	508	375	296	259	-0.506609	0.000214808	OK	-0.634498	6.8937e-06	OK	-0.531884	0.00320811	OK	ARHGAP31	-0.118258	0.145617	-0.812117	0.416724	0.68723	OK	-0.523584	0.165158	-3.1702	0.00152334	0.0225881	OK
ENSG00000031691.7	24	41	56	43	19	15	38	33	39	54	31	37	26	32	46	26	25	23	-0.443786	0.341832	OK	0.0592269	0.871994	OK	-0.241309	0.570687	OK	CENPQ	0.700706	0.422553	1.65827	0.0972631	0.307704	OK	0.0605315	0.470481	0.128659	0.897628	0.974591	OK
ENSG00000031698.13	1047	1119	1083	1366	944	1009	1053	805	1205	1393	857	1185	1046	1172	1500	1122	1021	1147	0.317858	0.00157564	OK	0.0822256	0.426329	OK	0.0626716	0.638086	OK	SARS	-0.0448476	0.107478	-0.417273	0.676479	0.857194	OK	-0.0520587	0.118489	-0.439354	0.660405	0.896253	OK
ENSG00000031823.14	554	616	627	525	355	377	470	392	544	525	290	442	554	572	682	413	363	366	-0.414902	0.00121907	OK	-0.222816	0.135762	OK	-0.471917	0.00649664	OK	RANBP3	0.00477021	0.153366	0.0311034	0.975187	0.990559	OK	-0.0566266	0.181241	-0.312438	0.754707	0.930078	OK
ENSG00000032219.19	110	136	149	218	185	186	97	100	121	237	150	205	166	151	171	185	238	192	0.670702	0.00251925	OK	1.0872	1.8744e-07	OK	0.86925	0.00106412	OK	ARID4A	0.108038	0.20756	0.520517	0.602703	0.817835	OK	0.363437	0.275344	1.31994	0.186857	0.537957	OK
ENSG00000032389.12	128	140	116	122	90	85	133	83	105	144	108	121	142	123	140	118	103	91	-0.282682	0.194528	OK	0.191818	0.475706	OK	-0.081528	0.728038	OK	EIPR1	0.435085	0.246618	1.7642	0.0776981	0.265007	OK	0.170922	0.247232	0.691343	0.48935	0.805364	OK
ENSG00000032444.16	1144	1282	1158	1142	741	765	883	574	852	1093	576	741	1002	940	1140	944	781	823	-0.24705	0.0377947	OK	0.0253966	0.854485	OK	-0.131257	0.259876	OK	PNPLA6	-0.24679	0.133785	-1.84468	0.0650848	0.237101	OK	-0.0154342	0.135452	-0.113946	0.909281	0.976715	OK
ENSG00000032742.17	200	194	196	168	119	121	153	109	163	140	72	112	174	123	173	152	126	114	-0.272469	0.16722	OK	-0.314046	0.203176	OK	0.126695	0.550563	OK	IFT88	-0.303111	0.244472	-1.23986	0.215027	0.484177	OK	-0.00240596	0.215907	-0.0111435	0.991109	0.99839	OK
ENSG00000033011.12	281	311	305	298	184	185	253	184	254	330	141	237	320	291	357	243	197	215	-0.0374846	0.823042	OK	-0.0953662	0.632729	OK	-0.36978	0.0191123	OK	ALG1	-0.0990216	0.205586	-0.481655	0.630051	0.83277	OK	-0.220794	0.183124	-1.2057	0.227932	0.58675	OK
ENSG00000033030.14	137	156	194	248	183	177	117	94	180	212	159	186	120	161	216	209	198	197	0.593643	0.00604154	OK	0.493973	0.0328671	OK	0.558177	0.0124068	OK	ZCCHC8	-0.0992974	0.196045	-0.506503	0.612504	0.824194	OK	-0.00550901	0.177109	-0.0311053	0.975186	0.994409	OK
ENSG00000033050.9	565	540	520	440	261	270	485	347	599	518	218	382	468	357	555	319	302	242	-0.600022	7.5131e-06	OK	-0.50956	0.000681902	OK	-0.521362	0.0161902	OK	ABCF2	0.182298	0.164465	1.10843	0.267677	0.543825	OK	-0.121082	0.191133	-0.633497	0.526409	0.827468	OK
ENSG00000033100.16	2462	2995	2816	2416	1679	1946	2402	1937	2752	2838	1582	2386	2929	3040	3386	2594	2195	2386	-0.198181	0.063326	OK	-0.174601	0.0637975	OK	-0.19261	0.0539015	OK	CHPF2	0.0803909	0.108227	0.742798	0.457604	0.719019	OK	0.197436	0.11282	1.75001	0.0801162	0.343527	OK
ENSG00000033170.16	842	1031	837	957	728	646	615	423	789	809	512	604	494	493	650	486	448	515	0.0953408	0.474737	OK	0.00618437	0.964272	OK	0.101149	0.489803	OK	FUT8	-0.31774	0.136003	-2.33627	0.0194772	0.105759	OK	-0.726685	0.145442	-4.99638	5.84153e-07	2.86782e-05	OK
ENSG00000033178.13	557	559	539	530	294	323	513	401	649	549	274	384	478	487	572	359	288	255	-0.390102	0.0987717	OK	-0.0959899	0.586732	OK	-0.422071	0.0991805	OK	UBA6	0.363697	0.247377	1.47022	0.141503	0.385608	OK	0.0792035	0.293717	0.269659	0.787422	0.941577	OK
ENSG00000033327.13	183	201	170	394	285	298	148	110	176	400	232	370	195	176	196	313	333	334	1.10651	3.83066e-12	OK	1.32894	9.14761e-12	OK	0.920541	1.8868e-07	OK	GAB2	0.129686	0.179239	0.72354	0.469348	0.727456	OK	-0.0079688	0.165205	-0.0482357	0.961528	0.990989	OK
ENSG00000033627.16	790	763	654	1053	503	529	562	329	514	669	274	439	865	636	752	864	453	517	0.165517	0.255122	OK	-0.108635	0.513896	OK	-0.0359873	0.864144	OK	ATP6V0A1	-0.559433	0.173156	-3.23081	0.00123438	0.0132628	OK	-0.116414	0.210821	-0.552194	0.580815	0.860263	OK
ENSG00000033800.13	296	323	339	349	239	231	238	180	273	367	238	339	257	231	353	272	283	260	0.0211943	0.908274	OK	0.64777	0.00155638	OK	0.448086	0.0788506	OK	PIAS1	0.605177	0.17524	3.45341	0.000553541	0.00697197	OK	0.415595	0.207414	2.00369	0.0451027	0.24716	OK
ENSG00000033867.16	537	631	608	707	588	562	709	517	770	894	524	708	552	526	655	484	504	487	0.295744	0.016108	OK	-0.087717	0.53266	OK	0.190735	0.191802	OK	SLC4A7	0.178298	0.126725	1.40696	0.159438	0.412737	OK	-0.107158	0.137473	-0.779485	0.435694	0.769194	OK
ENSG00000034053.14	178	247	193	197	136	132	202	160	236	225	169	187	181	190	259	173	170	169	-0.0202756	0.914552	OK	-0.237443	0.249527	OK	-0.0773691	0.682662	OK	APBA2	0.179479	0.197924	0.906807	0.364509	0.643122	OK	0.0405283	0.195154	0.207673	0.835484	0.956078	OK
ENSG00000034152.19	1084	1061	1077	2574	1929	1980	874	547	853	1587	724	1232	985	778	1027	1656	1157	1412	1.37372	1.0028e-29	OK	0.704076	1.95e-07	OK	0.931957	4.62869e-17	OK	MAP2K3	-0.961105	0.132526	-7.25221	4.10029e-13	3.35205e-11	OK	-0.680747	0.113972	-5.97295	2.32997e-09	1.82881e-07	OK
ENSG00000034510.6	9463	11319	10788	10244	8252	9023	8802	8093	11704	11338	8669	12563	11150	12317	15318	10865	12615	13212	0.0897912	0.409191	OK	0.0997762	0.470026	OK	0.139551	0.306375	OK	TMSB10	0.153937	0.141851	1.0852	0.277834	0.556091	OK	0.369451	0.146275	2.52573	0.0115459	0.0999932	OK
ENSG00000034533.11	68	88	78	34	27	44	71	73	97	45	48	42	81	76	83	26	51	42	-0.793168	0.0172776	OK	-0.857131	0.0106579	OK	-0.804895	0.0243329	OK	ASTE1	0.282933	0.402785	0.702442	0.482404	0.73727	OK	0.172164	0.433305	0.397327	0.691126	0.906261	OK
ENSG00000034677.13	547	563	585	1140	715	774	524	382	665	785	439	629	569	470	586	752	610	636	1.03243	3.99452e-12	OK	0.29491	0.0423259	OK	0.291457	0.0746051	OK	RNF19A	-0.557257	0.152447	-3.6554	0.000256777	0.00371804	OK	-0.490093	0.152273	-3.21851	0.00128859	0.0194819	OK
ENSG00000034693.15	131	107	117	122	66	75	104	91	99	106	84	86	100	92	115	75	79	58	-0.110845	0.669107	OK	-0.104033	0.731022	OK	-0.337684	0.199232	OK	PEX3	0.0855412	0.304644	0.28079	0.778871	0.910087	OK	-0.258361	0.291925	-0.885025	0.376143	0.726471	OK
ENSG00000034713.8	425	467	434	458	295	335	410	303	434	460	289	399	416	373	494	407	353	320	-0.0361284	0.783558	OK	-0.0839822	0.546246	OK	-0.0329096	0.815424	OK	GABARAPL2	0.0349231	0.14455	0.241598	0.809091	0.923437	OK	0.0036477	0.149244	0.0244412	0.980501	0.995907	OK
ENSG00000035115.22	189	175	187	162	169	159	108	109	176	181	119	148	167	168	210	164	145	173	0.0826531	0.71994	OK	-0.0749864	0.744364	OK	-0.107854	0.58165	OK	SH3YL1	-0.336323	0.235737	-1.42668	0.153671	0.405361	OK	-0.150779	0.235695	-0.63972	0.522355	0.825258	OK
ENSG00000035141.8	295	350	264	300	188	184	300	202	334	331	176	249	301	237	327	236	215	217	-0.162512	0.311388	OK	-0.184526	0.235521	OK	-0.120356	0.459701	OK	FAM136A	0.139331	0.165049	0.844177	0.39857	0.672131	OK	0.0094557	0.169001	0.0559505	0.955381	0.988877	OK
ENSG00000035403.17	26597	24346	23702	25794	14857	14476	24813	15720	24068	26628	12622	17934	26217	18851	24461	19774	13576	14165	-0.221484	0.0333628	OK	-0.274706	0.0116387	OK	-0.307454	0.0143465	OK	VCL	0.00173163	0.11854	0.014608	0.988345	0.99614	OK	-0.161795	0.129846	-1.24605	0.212745	0.570449	OK
ENSG00000035499.13	20	21	22	34	12	13	31	12	26	32	17	19	11	10	22	10	10	16	-0.00690636	0.989455	OK	-0.0603099	0.903249	OK	-0.050952	0.93788	OK	DEPDC1B	0.189467	0.514669	0.368133	0.712774	0.875704	OK	-0.54505	0.594926	-0.916165	0.35958	0.713861	OK
ENSG00000035664.11	52	56	47	63	30	49	31	16	28	35	21	33	27	32	28	22	25	32	0.282966	0.410338	OK	0.389823	0.375391	OK	-0.238057	0.579514	OK	DAPK2	-0.291214	0.395876	-0.73562	0.461962	0.721621	OK	-0.982256	0.395303	-2.48482	0.0129617	0.108564	OK
ENSG00000035681.9	345	386	274	453	285	260	255	185	255	334	156	226	286	216	294	292	193	240	0.639541	0.000385765	OK	0.383806	0.035296	OK	0.491484	0.00641231	OK	NSMAF	-0.498194	0.181059	-2.75155	0.00593141	0.0446365	OK	-0.417176	0.186967	-2.23128	0.0256628	0.173575	OK
ENSG00000035687.10	678	664	651	940	683	644	472	382	565	579	303	446	564	541	698	543	436	485	0.448298	0.000134367	OK	-0.198639	0.122878	OK	-0.0865593	0.494266	OK	ADSS	-0.824192	0.129012	-6.38848	1.6754e-10	9.97813e-09	OK	-0.614109	0.129563	-4.73984	2.13891e-06	9.19239e-05	OK
ENSG00000035862.12	17284	18122	17868	18100	12015	13396	8926	7716	12196	11587	7229	11599	18002	15640	20579	16490	13795	15455	-0.0378932	0.634169	OK	-0.00424988	0.971046	OK	-0.0298009	0.725092	OK	TIMP2	-0.565515	0.108484	-5.21287	1.85938e-07	6.50883e-06	OK	0.0581726	0.0966349	0.601983	0.547186	0.842532	OK
ENSG00000035928.16	445	569	489	596	417	371	504	380	597	669	409	536	454	456	579	371	424	354	0.430529	0.0176158	OK	0.249814	0.0598659	OK	0.0131668	0.960448	OK	RFC1	0.0815451	0.140245	0.581446	0.56094	0.791233	OK	-0.186429	0.270715	-0.688655	0.49104	0.806687	OK
ENSG00000036054.13	511	509	529	595	374	405	384	341	540	517	292	395	445	429	606	357	325	332	0.0960898	0.452414	OK	-0.121195	0.381608	OK	-0.125258	0.449138	OK	TBC1D23	-0.185796	0.139416	-1.33268	0.182638	0.442868	OK	-0.188883	0.156095	-1.21005	0.226259	0.584393	OK
ENSG00000036257.13	849	923	873	1032	675	659	671	529	794	926	504	702	853	739	1047	844	745	825	0.16323	0.11446	OK	0.174859	0.123527	OK	0.297127	0.00970678	OK	CUL3	-0.0844067	0.117282	-0.719688	0.471717	0.729068	OK	0.178712	0.123025	1.45265	0.146322	0.482138	OK
ENSG00000036549.13	441	516	515	726	493	498	367	257	474	732	403	557	457	409	518	593	561	468	0.756476	2.1441e-07	OK	0.723646	2.60455e-05	OK	0.678291	6.0042e-08	OK	AC118549.1	-0.0681292	0.133859	-0.508964	0.610778	0.823421	OK	-0.00713363	0.130711	-0.0545755	0.956477	0.989303	OK
ENSG00000036672.16	32	24	22	107	76	55	64	36	50	219	113	155	35	22	37	133	105	88	1.75959	1.17719e-06	OK	1.38153	4.3971e-08	OK	1.56538	1.077e-06	OK	USP2	0.811403	0.234857	3.45488	0.00055054	0.00694081	OK	0.30974	0.260463	1.18919	0.234366	0.595362	OK
ENSG00000037042.9	163	193	172	157	108	114	191	122	210	222	133	187	193	159	203	164	122	138	-0.305178	0.113347	OK	-0.0356003	0.849762	OK	-0.252403	0.201494	OK	TUBG2	0.491264	0.198028	2.48078	0.0131097	0.0795308	OK	0.153542	0.21128	0.72672	0.467398	0.791864	OK
ENSG00000037241.7	191	177	149	153	86	134	150	107	174	187	89	141	158	140	168	153	137	134	-0.195562	0.380125	OK	-0.161346	0.421734	OK	0.261444	0.197551	OK	RPL26L1	0.0689126	0.224124	0.307475	0.758482	0.900819	OK	0.330797	0.229364	1.44223	0.149236	0.486856	OK
ENSG00000037474.15	646	640	656	543	294	365	564	369	568	404	225	300	665	580	780	349	270	293	-0.330095	0.0142121	OK	-0.665638	1.38071e-06	OK	-0.702066	2.10999e-07	OK	NSUN2	-0.520482	0.152312	-3.41721	0.000632667	0.0078116	OK	-0.332461	0.15848	-2.09782	0.0359212	0.213831	OK
ENSG00000037637.11	292	341	306	171	158	159	298	196	291	239	185	212	305	229	308	146	182	169	-0.811	6.15747e-05	OK	-0.186316	0.333019	OK	-0.55966	0.00452102	OK	FBXO42	0.505826	0.192279	2.63069	0.00852106	0.058111	OK	0.0461175	0.208827	0.220841	0.825216	0.953348	OK
ENSG00000037749.12	306	389	355	333	195	218	255	186	356	282	151	229	365	295	437	278	209	179	-0.140208	0.373032	OK	-0.568401	0.0027897	OK	-0.57638	0.00313606	OK	MFAP3	-0.391263	0.194519	-2.01144	0.0442785	0.184648	OK	-0.16141	0.203421	-0.793477	0.4275	0.763637	OK
ENSG00000037757.14	242	248	244	193	141	123	219	188	240	216	122	152	209	148	248	159	122	132	-0.630692	0.000720528	OK	-0.613579	0.00157424	OK	-0.569826	0.00283233	OK	MRI1	0.0682293	0.197727	0.345068	0.730043	0.886015	OK	-0.248791	0.200538	-1.24062	0.214748	0.571264	OK
ENSG00000037897.17	122	111	131	70	41	44	91	76	108	86	53	67	110	98	124	62	57	47	-0.718284	0.0123463	OK	-0.413735	0.119159	OK	-0.640482	0.0159045	OK	METTL1	0.12962	0.304518	0.425658	0.670357	0.854371	OK	-0.12889	0.324209	-0.397551	0.690961	0.906261	OK
ENSG00000038002.9	146	162	170	165	106	97	111	101	157	166	92	129	178	199	238	150	151	153	0.080436	0.721783	OK	0.474184	0.0581914	OK	-0.16505	0.498487	OK	AGA	0.309774	0.24533	1.26268	0.206703	0.473976	OK	0.506371	0.241053	2.10066	0.0356709	0.213077	OK
ENSG00000038210.14	118	131	155	121	100	138	129	112	165	143	65	125	105	93	160	95	84	80	0.095481	0.699053	OK	-0.389896	0.0809475	OK	-0.156308	0.540209	OK	PI4K2B	-0.16753	0.26285	-0.637361	0.52389	0.766739	OK	-0.354564	0.271822	-1.3044	0.192098	0.543626	OK
ENSG00000038219.13	619	739	697	866	573	594	538	405	719	787	480	581	661	678	867	580	563	540	0.108595	0.367077	OK	-0.16222	0.369042	OK	0.0116827	0.940297	OK	BOD1L1	-0.185427	0.130444	-1.4215	0.155171	0.407494	OK	-0.0468637	0.146866	-0.319092	0.749657	0.927788	OK
ENSG00000038274.17	309	316	376	369	250	252	64	66	137	171	135	146	292	278	378	325	274	278	-0.00920024	0.954363	OK	0.817963	0.00233854	OK	0.118543	0.448341	OK	MAT2B	-0.878611	0.183938	-4.77667	1.78224e-06	4.90751e-05	OK	0.081778	0.154487	0.529352	0.596561	0.869324	OK
ENSG00000038358.15	745	792	737	650	416	429	724	459	765	667	333	531	724	660	815	519	433	386	-0.185995	0.227911	OK	-0.425471	0.0216265	OK	-0.306597	0.0489329	OK	EDC4	-0.108192	0.165562	-0.653485	0.513444	0.760611	OK	-0.102511	0.182063	-0.563054	0.573398	0.855308	OK
ENSG00000038382.20	2468	2496	2341	3279	2055	2096	3057	2097	3053	4207	2442	3352	2469	2331	2731	2319	2097	2050	0.276265	0.0128727	OK	0.0697595	0.493221	OK	-0.0938548	0.43604	OK	TRIO	0.221563	0.110938	1.99718	0.0458052	0.188756	OK	-0.322188	0.131974	-2.44131	0.0146342	0.117781	OK
ENSG00000038427.16	46098	58059	50988	48689	31238	30868	37535	33685	57001	43606	28171	42990	50487	53127	61417	35937	33309	33342	-0.255476	0.00255194	OK	-0.302259	0.0239528	OK	-0.466667	5.94399e-07	OK	VCAN	0.00269242	0.104906	0.025665	0.979525	0.992201	OK	-0.085243	0.0883836	-0.964467	0.334812	0.694747	OK
ENSG00000038532.16	324	370	340	378	227	266	267	179	334	297	206	285	366	346	386	307	301	308	-0.11105	0.471575	OK	-0.0831618	0.67185	OK	-0.148143	0.367286	OK	CLEC16A	-0.154596	0.184603	-0.837451	0.402339	0.675199	OK	0.0886342	0.162163	0.546573	0.584672	0.862273	OK
ENSG00000039123.16	535	581	570	568	359	358	515	353	557	572	274	419	540	473	649	438	329	352	-0.184174	0.416391	OK	-0.0905299	0.651802	OK	-0.636949	0.000149794	OK	MTREX	0.0818438	0.205614	0.398045	0.690597	0.863737	OK	-0.0584141	0.207534	-0.281468	0.778352	0.937937	OK
ENSG00000039139.9	33	14	25	20	8	10	40	19	31	36	23	27	29	31	17	14	9	14	-0.727625	0.33667	OK	-0.274542	0.600759	OK	-0.0272465	0.962996	OK	DNAH5	0.884503	0.604903	1.46222	0.143681	0.388712	OK	0.924284	0.644721	1.43362	0.151681	0.491088	OK
ENSG00000039319.17	355	442	391	448	265	287	334	193	371	371	203	258	411	311	413	340	238	230	0.139843	0.450825	OK	-0.254647	0.0947137	OK	-0.499978	0.0108795	OK	ZFYVE16	-0.509441	0.19273	-2.64329	0.00821041	0.0563722	OK	-0.459111	0.202206	-2.27052	0.0231763	0.162197	OK
ENSG00000039523.20	1818	1721	1603	1803	1153	1194	1506	1009	1599	1876	905	1354	1826	1391	1819	1530	1199	1202	-0.0507175	0.666173	OK	-0.00499053	0.961766	OK	-0.0462487	0.71557	OK	RIPOR1	-0.0742903	0.107393	-0.69176	0.489088	0.742318	OK	-0.0435117	0.121742	-0.357409	0.720785	0.915978	OK
ENSG00000039560.14	3785	3996	3917	3508	2213	2528	3623	2577	3913	3562	1853	2703	3900	3282	4382	2823	2301	2676	-0.337518	0.00621981	OK	-0.46933	0.000160136	OK	-0.231027	0.0411593	OK	RAI14	-0.0562474	0.111416	-0.504839	0.613672	0.824754	OK	0.0579668	0.11762	0.492829	0.622133	0.881226	OK
ENSG00000039650.12	223	263	213	204	149	171	208	148	227	279	133	181	238	213	232	222	155	204	-0.0715717	0.685749	OK	-0.214295	0.25615	OK	0.0199054	0.923893	OK	PNKP	0.0835407	0.197518	0.422952	0.67233	0.854981	OK	0.1616	0.221142	0.730753	0.46493	0.789893	OK
ENSG00000040199.18	573	579	622	471	261	264	658	382	529	472	185	310	578	488	640	408	286	287	-0.657127	3.90969e-06	OK	-0.808325	6.2338e-06	OK	-0.390577	0.0106117	OK	PHLPP2	-0.12708	0.172662	-0.736006	0.461727	0.721593	OK	0.163853	0.172874	0.947817	0.343222	0.702251	OK
ENSG00000040275.17	329	403	404	254	187	187	497	355	598	470	295	488	390	427	610	225	262	318	-0.514429	0.00607273	OK	-0.219908	0.129502	OK	-0.47607	0.0315775	OK	SPDL1	0.913058	0.174527	5.23161	1.68042e-07	5.98341e-06	OK	0.404372	0.228576	1.76909	0.0768787	0.335573	OK
ENSG00000040341.18	463	493	452	518	342	349	327	229	381	422	216	325	443	404	452	391	317	308	0.0207936	0.891669	OK	-0.135144	0.38666	OK	0.00779566	0.96771	OK	STAU2	-0.235403	0.154785	-1.52084	0.1283	0.36406	OK	-0.141008	0.18205	-0.774556	0.438602	0.771393	OK
ENSG00000040487.13	203	159	163	292	209	147	174	101	164	306	181	245	197	177	226	343	263	226	0.377662	0.0956251	OK	0.5403	0.00395717	OK	0.600871	0.000992368	OK	SLC66A1	0.122214	0.200121	0.610698	0.541399	0.778018	OK	0.413512	0.212974	1.94161	0.0521849	0.2708	OK
ENSG00000040531.14	147	131	139	187	101	110	95	75	97	127	60	114	165	122	160	147	100	114	0.181278	0.439276	OK	0.670507	0.0126518	OK	-0.160721	0.559249	OK	CTNS	0.223283	0.257217	0.868071	0.385355	0.661284	OK	0.000818669	0.225022	0.00363818	0.997097	0.999173	OK
ENSG00000040608.14	35	25	27	33	17	10	26	9	18	26	3	6	37	23	21	46	10	30	-0.314813	0.532008	OK	-0.806174	0.269683	OK	0.232139	0.666821	OK	RTN4R	-0.913768	0.715175	-1.27768	0.201361	0.467344	OK	0.481424	0.580566	0.829233	0.406973	0.749157	OK
ENSG00000040633.13	735	712	673	571	294	290	712	459	696	751	495	616	652	587	727	788	569	623	-0.540823	0.00164687	OK	-0.0843855	0.497807	OK	0.291697	0.0400687	OK	PHF23	0.609501	0.17625	3.45816	0.000543884	0.00687666	OK	0.697325	0.181015	3.8523	0.000117011	0.00279378	OK
ENSG00000040731.10	39	64	65	96	53	38	69	38	78	107	58	87	36	45	54	59	60	39	0.0702057	0.827244	OK	0.517185	0.0853238	OK	0.405367	0.253734	OK	CDH10	0.670557	0.301464	2.22434	0.0261257	0.129225	OK	-0.186307	0.342889	-0.543344	0.586893	0.863896	OK
ENSG00000040933.15	255	251	265	296	154	184	232	170	243	280	126	192	257	240	283	213	191	176	-0.1711	0.364766	OK	-0.0675243	0.713234	OK	-0.129754	0.448407	OK	INPP4A	-0.0213162	0.197556	-0.107899	0.914075	0.969092	OK	-0.0274292	0.190071	-0.14431	0.885256	0.970718	OK
ENSG00000041353.10	89	69	70	133	94	65	27	17	21	48	16	32	39	22	31	25	24	23	0.844734	0.00787607	OK	0.431731	0.353895	OK	-0.0964218	0.826054	OK	RAB27B	-1.89879	0.367592	-5.16548	2.39818e-07	8.30654e-06	OK	-2.17543	0.371114	-5.8619	4.57612e-09	3.50782e-07	OK
ENSG00000041357.16	739	766	655	689	363	397	587	402	615	660	339	430	691	514	671	519	387	414	-0.27561	0.0369481	OK	-0.255266	0.0510572	OK	-0.318649	0.0293658	OK	PSMA4	-0.111296	0.151442	-0.734903	0.462398	0.721862	OK	-0.163039	0.160564	-1.01542	0.309907	0.67256	OK
ENSG00000041802.11	339	329	293	222	164	154	247	191	298	286	160	184	272	281	326	221	173	229	-0.59929	0.000472965	OK	-0.299703	0.096055	OK	-0.188763	0.298653	OK	LSG1	0.129656	0.203132	0.638281	0.523291	0.766739	OK	0.208247	0.205547	1.01314	0.310995	0.673693	OK
ENSG00000041880.14	400	395	385	470	287	288	414	288	451	487	335	405	375	314	443	366	336	331	0.102071	0.495362	OK	-0.0609321	0.661921	OK	0.180724	0.226367	OK	PARP3	0.0717347	0.148179	0.484108	0.628309	0.831882	OK	-0.0203446	0.155443	-0.130881	0.895869	0.974285	OK
ENSG00000041982.16	3523	3509	2736	4427	3220	2175	7900	5022	6639	8296	3752	4722	3705	3016	3253	2709	1863	1741	0.283476	0.0688765	OK	-0.345814	0.00916401	OK	-0.469999	0.00364475	OK	TNC	0.621983	0.163308	3.80866	0.000139724	0.00224274	OK	-0.717975	0.186645	-3.84674	0.0001197	0.00285278	OK
ENSG00000041988.15	63	85	62	47	37	34	67	50	69	59	57	49	56	68	69	39	41	24	-0.559688	0.0761707	OK	-0.257957	0.448358	OK	-0.691859	0.0501068	OK	THAP3	0.430047	0.3601	1.19425	0.232382	0.505643	OK	-0.158473	0.388088	-0.408344	0.683021	0.903593	OK
ENSG00000042088.14	108	159	129	140	83	69	137	79	142	166	105	122	103	80	127	90	98	83	0.0178583	0.944865	OK	0.110247	0.623668	OK	0.125445	0.615434	OK	TDP1	0.448864	0.248874	1.80358	0.0712969	0.251382	OK	0.140799	0.268342	0.524701	0.599791	0.870524	OK
ENSG00000042286.15	196	183	159	274	161	155	177	97	155	250	116	191	188	130	197	239	156	183	0.423206	0.0316822	OK	0.294701	0.15701	OK	0.440181	0.0269832	OK	AIFM2	-0.174062	0.200286	-0.869063	0.384812	0.660783	OK	0.0188442	0.20304	0.0928099	0.926055	0.981017	OK
ENSG00000042317.17	53	64	44	86	62	42	37	23	55	79	46	78	42	50	63	70	78	59	0.397076	0.207818	OK	0.82956	0.0111702	OK	0.765702	0.0120286	OK	SPATA7	-0.0437369	0.294213	-0.148657	0.881824	0.956405	OK	0.185167	0.302543	0.612036	0.540514	0.83797	OK
ENSG00000042429.12	259	334	299	377	250	232	260	195	281	310	196	280	266	247	313	261	204	227	0.289161	0.0475455	OK	0.00506154	0.975413	OK	0.223884	0.208296	OK	MED17	-0.242142	0.155654	-1.55564	0.119794	0.349067	OK	-0.0906397	0.17959	-0.504705	0.613766	0.877683	OK
ENSG00000042445.14	512	494	423	572	301	293	372	273	373	531	242	298	408	320	422	385	275	301	-0.0774434	0.625242	OK	0.149311	0.458124	OK	-0.0552269	0.766637	OK	RETSAT	0.0174813	0.208632	0.0837901	0.933223	0.975361	OK	-0.203133	0.185733	-1.09369	0.274092	0.635411	OK
ENSG00000042493.16	19	22	16	28	17	13	14	7	17	20	8	17	31	28	31	16	22	21	-0.330627	0.547888	OK	-0.0158112	0.980345	OK	-0.485311	0.289203	OK	CAPG	-0.447247	0.570919	-0.78338	0.433404	0.699505	OK	-0.255145	0.522737	-0.488095	0.625483	0.881594	OK
ENSG00000042753.11	831	920	777	847	624	654	850	598	856	1125	557	885	790	794	901	798	723	725	0.0436065	0.693616	OK	0.032195	0.773423	OK	0.0756383	0.532182	OK	AP2S1	0.141763	0.116065	1.22141	0.221931	0.493117	OK	0.066718	0.119013	0.560595	0.575074	0.856289	OK
ENSG00000043093.15	275	279	285	345	204	209	235	197	277	251	153	205	258	246	299	237	179	162	0.151893	0.367278	OK	-0.259059	0.118706	OK	-0.141174	0.418228	OK	DCUN1D1	-0.406962	0.18135	-2.24406	0.0248283	0.124302	OK	-0.223666	0.192956	-1.15916	0.246392	0.608378	OK
ENSG00000043143.20	205	270	279	387	266	236	221	137	228	469	227	315	217	200	271	379	302	404	0.880583	4.07172e-07	OK	0.688516	0.000359116	OK	1.02888	1.98491e-11	OK	JADE2	-0.169801	0.193299	-0.878434	0.379708	0.65627	OK	0.156879	0.165369	0.948659	0.342794	0.702001	OK
ENSG00000043514.17	226	225	186	170	109	116	185	154	181	208	122	149	192	195	212	120	139	137	-0.46289	0.0220131	OK	-0.153508	0.452249	OK	-0.469557	0.0233707	OK	TRIT1	0.338831	0.213075	1.59019	0.111792	0.335789	OK	-0.00928127	0.231184	-0.0401467	0.967976	0.992509	OK
ENSG00000044090.8	882	968	859	837	521	500	620	469	732	684	414	562	793	747	958	578	518	567	-0.305022	0.00661245	OK	-0.221878	0.0632183	OK	-0.470763	0.000269435	OK	CUL7	-0.220667	0.127336	-1.73295	0.0831048	0.277557	OK	-0.153269	0.132112	-1.16015	0.245989	0.607693	OK
ENSG00000044115.21	5046	5445	5314	4989	3188	3284	4299	3236	5170	4627	2586	4041	5471	4775	6289	4322	3454	3765	-0.209953	0.0152765	OK	-0.358459	0.000355903	OK	-0.154907	0.0967365	OK	CTNNA1	-0.103795	0.102861	-1.00908	0.312935	0.592582	OK	0.16736	0.0946463	1.76826	0.0770171	0.335641	OK
ENSG00000044446.12	215	239	205	216	120	125	140	85	172	147	92	132	197	161	226	160	102	126	-0.410286	0.0218219	OK	-0.0211117	0.948874	OK	-0.35629	0.135331	OK	PHKA2	-0.156021	0.298642	-0.522435	0.601368	0.817095	OK	-0.171588	0.208011	-0.824899	0.409429	0.750341	OK
ENSG00000044459.15	128	132	147	200	148	136	82	54	111	178	105	152	116	97	152	162	124	148	0.538183	0.0120592	OK	0.760393	0.0011937	OK	0.561465	0.0107579	OK	CNTLN	-0.115051	0.209522	-0.549113	0.582928	0.805511	OK	-0.0623967	0.219909	-0.283738	0.776611	0.937611	OK
ENSG00000044524.11	12	24	35	24	18	13	12	20	35	28	28	38	17	34	36	22	27	13	-0.207413	0.703501	OK	0.545835	0.295133	OK	-0.239746	0.649646	OK	EPHA3	1.06697	0.494966	2.15564	0.031112	0.146352	OK	0.323816	0.529573	0.611466	0.540891	0.838259	OK
ENSG00000044574.8	14171	16320	14397	15584	12621	12633	14641	11515	17890	17167	12366	16998	19914	18248	21906	17948	20570	18277	0.145435	0.151084	OK	0.0378453	0.728426	OK	0.156672	0.165531	OK	HSPA5	0.146337	0.125822	1.16304	0.244812	0.518434	OK	0.466317	0.13288	3.50931	0.000449272	0.00852115	OK
ENSG00000046604.13	2123	2058	1993	2390	1374	1434	2505	1721	2415	2950	1485	2009	2311	2016	2375	1869	1640	1707	-0.00561878	0.955416	OK	-0.130563	0.242212	OK	-0.128972	0.184581	OK	DSG2	0.267585	0.117172	2.2837	0.0223892	0.116707	OK	0.0431063	0.110292	0.390839	0.695916	0.90725	OK
ENSG00000046647.13	102	93	104	103	76	63	66	43	77	76	53	70	92	87	102	68	83	79	-0.105441	0.678806	OK	0.104124	0.724449	OK	0.00510123	0.984776	OK	GEMIN8	-0.259155	0.279528	-0.927115	0.353867	0.633037	OK	-0.0747033	0.281391	-0.265478	0.790641	0.942672	OK
ENSG00000046651.15	254	251	211	277	197	187	243	143	207	303	163	221	204	173	227	257	234	201	0.22092	0.234153	OK	0.389797	0.0701759	OK	0.556938	0.00196808	OK	OFD1	0.324737	0.207845	1.5624	0.118193	0.34636	OK	0.170987	0.189494	0.902336	0.366879	0.720369	OK
ENSG00000047056.16	324	296	272	780	350	404	395	240	349	652	291	432	353	290	381	715	446	489	1.03936	4.13872e-09	OK	0.427191	0.0125171	OK	0.954924	9.6684e-08	OK	WDR37	-0.177184	0.174927	-1.0129	0.311108	0.590527	OK	0.145739	0.190666	0.764365	0.44465	0.775861	OK
ENSG00000047188.16	305	384	365	301	248	218	310	247	332	279	169	240	290	276	408	249	191	204	-0.119568	0.505863	OK	-0.713968	0.00037945	OK	-0.289729	0.154254	OK	YTHDC2	-0.252423	0.171101	-1.47528	0.140137	0.383547	OK	-0.111771	0.17673	-0.632438	0.527101	0.827776	OK
ENSG00000047230.15	188	171	195	208	111	102	169	112	208	187	110	141	153	143	186	147	110	113	-0.188047	0.395281	OK	0.147245	0.54361	OK	-0.0191614	0.933301	OK	CTPS2	0.434586	0.245858	1.76763	0.0771231	0.263616	OK	-0.0761441	0.242175	-0.314418	0.753204	0.929223	OK
ENSG00000047249.18	463	438	398	684	451	450	375	262	418	651	365	451	384	326	374	546	457	485	0.542751	2.14504e-05	OK	0.3693	0.0145119	OK	0.724018	4.36108e-06	OK	ATP6V1H	-0.0864691	0.139863	-0.618239	0.536418	0.77518	OK	-0.125279	0.146877	-0.852948	0.393688	0.739223	OK
ENSG00000047315.16	844	965	833	1023	546	523	749	520	812	954	410	591	762	666	888	667	490	520	-0.105356	0.416012	OK	-0.00279514	0.982618	OK	-0.156436	0.266099	OK	POLR2B	0.0484029	0.150082	0.32251	0.747066	0.896017	OK	-0.210843	0.161202	-1.30794	0.190894	0.542847	OK
ENSG00000047346.12	234	244	182	476	276	256	246	175	284	530	294	365	230	191	189	341	308	287	1.00389	1.18107e-06	OK	0.631938	0.000114847	OK	0.938124	2.10786e-06	OK	FAM214A	0.0665718	0.196219	0.339273	0.734404	0.888603	OK	-0.0981861	0.205414	-0.477992	0.632656	0.885323	OK
ENSG00000047365.12	549	592	609	440	238	213	632	453	626	478	185	259	619	496	648	321	177	239	-0.797737	4.29922e-06	OK	-1.24318	3.86664e-09	OK	-1.09769	1.05586e-06	OK	ARAP2	-0.107383	0.2212	-0.485458	0.627351	0.831701	OK	-0.183427	0.260659	-0.703704	0.481617	0.80003	OK
ENSG00000047410.14	1674	1739	1700	1625	973	1083	1546	1035	1633	1650	853	1213	1632	1385	1759	1093	1009	1004	-0.296677	0.00118335	OK	-0.140407	0.288128	OK	-0.344054	0.0167316	OK	TPR	0.320184	0.130991	2.44432	0.0145126	0.0861204	OK	-0.139949	0.14298	-0.978798	0.32768	0.687897	OK
ENSG00000047578.13	400	408	376	486	353	283	344	252	360	469	262	330	398	351	406	359	325	310	0.217889	0.183256	OK	0.0293003	0.879018	OK	-0.439355	0.0100624	OK	KIAA0556	-0.0898064	0.194178	-0.462496	0.643726	0.840732	OK	-0.591741	0.169851	-3.48388	0.0004942	0.00922789	OK
ENSG00000047579.19	94	85	80	78	62	55	60	49	61	77	48	53	86	66	81	82	67	58	-0.204715	0.481731	OK	0.0806697	0.791429	OK	0.0463849	0.866613	OK	DTNBP1	-0.0678096	0.310942	-0.218078	0.827368	0.93203	OK	-0.0329617	0.301311	-0.109394	0.91289	0.977308	OK
ENSG00000047621.12	265	254	290	232	115	144	244	175	263	231	143	180	266	196	274	181	151	141	-0.555862	0.00368322	OK	-0.293022	0.152877	OK	-0.241412	0.243929	OK	C12orf4	0.505184	0.213495	2.36626	0.0179687	0.0997058	OK	0.325196	0.218666	1.48718	0.136968	0.466143	OK
ENSG00000047634.15	68	55	57	102	38	53	79	43	60	114	48	71	75	37	51	88	57	52	0.241179	0.431669	OK	0.228773	0.451592	OK	0.443695	0.199373	OK	SCML1	0.227243	0.300012	0.757447	0.448782	0.712491	OK	0.0995176	0.311626	0.319349	0.749462	0.927788	OK
ENSG00000047644.18	1177	1372	1275	929	710	743	763	511	864	719	387	621	1190	1090	1503	861	685	771	-0.376249	0.00209747	OK	-0.381808	0.00529723	OK	-0.531731	5.10469e-06	OK	WWC3	-0.453244	0.152311	-2.97577	0.00292255	0.0258339	OK	-0.133289	0.13907	-0.95843	0.337846	0.696732	OK
ENSG00000047648.23	38	31	38	80	51	29	32	21	30	65	32	36	33	21	45	47	32	28	0.813504	0.0315674	OK	0.568879	0.139307	OK	0.448595	0.279715	OK	ARHGAP6	-0.269565	0.368398	-0.731724	0.464337	0.72301	OK	-0.451352	0.391915	-1.15166	0.249461	0.61083	OK
ENSG00000047849.21	6062	6129	6079	6264	4015	4398	5740	4026	6504	6851	3753	5794	7217	6084	7948	5639	4777	4946	-0.0692991	0.383519	OK	-0.093338	0.287887	OK	-0.233291	0.00567252	OK	MAP4	0.0973327	0.0940038	1.03541	0.300477	0.580108	OK	0.0791513	0.0911154	0.868693	0.385015	0.732585	OK
ENSG00000047932.14	752	815	760	897	613	583	718	532	906	855	502	698	766	736	904	705	691	625	0.0951281	0.381069	OK	-0.128996	0.260623	OK	-0.0125409	0.919478	OK	GOPC	-0.0437967	0.11779	-0.371821	0.710026	0.874379	OK	0.00202215	0.128963	0.0156801	0.98749	0.997443	OK
ENSG00000048028.11	216	265	221	244	182	160	139	121	199	157	111	137	186	205	247	193	171	166	0.231284	0.305461	OK	0.0495404	0.833141	OK	0.400335	0.128201	OK	USP28	-0.675418	0.220162	-3.06782	0.00215626	0.02033	OK	0.0455322	0.252076	0.180629	0.856659	0.962053	OK
ENSG00000048052.21	275	272	338	414	226	253	268	166	294	321	138	238	333	228	328	210	122	209	0.257571	0.117366	OK	-0.179401	0.345461	OK	-0.532746	0.0150183	OK	HDAC9	-0.428042	0.183021	-2.33876	0.019348	0.105169	OK	-0.724891	0.205786	-3.52255	0.000427423	0.00816715	OK
ENSG00000048140.18	757	648	555	632	372	371	637	472	563	726	358	570	703	576	656	591	391	381	-0.24884	0.118549	OK	-0.221589	0.162823	OK	-0.347322	0.0477648	OK	TSPAN17	0.126137	0.148862	0.84734	0.396806	0.670811	OK	-0.0814792	0.184737	-0.441055	0.659173	0.896096	OK
ENSG00000048162.20	171	167	164	140	128	88	173	130	164	120	82	99	168	101	148	95	112	88	-0.273273	0.232631	OK	-0.760561	0.000616391	OK	-0.245135	0.357774	OK	NOP16	-0.29094	0.259159	-1.12263	0.261594	0.53671	OK	-0.236274	0.271591	-0.869964	0.38432	0.731808	OK
ENSG00000048342.16	309	300	198	386	164	181	264	135	210	294	152	227	242	195	234	264	216	163	-0.0537063	0.830346	OK	0.48018	0.0542775	OK	0.121263	0.631005	OK	CC2D2A	0.0199183	0.219355	0.090804	0.927648	0.973577	OK	0.0411879	0.265876	0.154914	0.876889	0.968413	OK
ENSG00000048392.11	380	355	377	432	288	282	483	252	459	569	233	285	338	325	421	414	228	223	0.371923	0.0137339	OK	-0.166941	0.462808	OK	-0.0504392	0.796826	OK	RRM2B	-0.0750194	0.218324	-0.343616	0.731135	0.886309	OK	-0.352501	0.203452	-1.7326	0.0831663	0.351319	OK
ENSG00000048405.10	234	232	256	328	235	222	201	132	220	317	172	227	189	173	223	221	203	211	0.457122	0.00963506	OK	0.127756	0.524773	OK	0.399898	0.0610276	OK	ZNF800	-0.17903	0.174082	-1.02842	0.303751	0.583191	OK	-0.274962	0.20786	-1.32282	0.185895	0.536915	OK
ENSG00000048471.14	381	419	360	499	311	395	237	193	291	315	173	293	331	325	413	374	298	331	0.320868	0.0383308	OK	0.0130553	0.943118	OK	0.186799	0.202041	OK	SNX29	-0.628175	0.166885	-3.76412	0.000167138	0.00262514	OK	-0.273477	0.165357	-1.65386	0.0981551	0.38748	OK
ENSG00000048544.6	342	363	361	312	218	215	292	222	311	372	196	267	320	275	354	271	221	219	-0.253549	0.0819458	OK	-0.0654905	0.675109	OK	-0.183035	0.236706	OK	MRPS10	0.114461	0.161241	0.709879	0.477779	0.733271	OK	-0.0550302	0.165447	-0.332616	0.739424	0.924107	OK
ENSG00000048649.13	619	717	660	937	640	592	627	440	709	1015	609	784	689	575	762	723	769	634	0.202205	0.211355	OK	0.40729	0.000817596	OK	0.621958	0.00618213	OK	RSF1	0.307458	0.135873	2.26284	0.0236455	0.120816	OK	0.482064	0.18895	2.55128	0.0107328	0.0955099	OK
ENSG00000048707.15	598	650	656	676	493	537	486	348	590	598	363	508	633	658	759	525	503	498	0.25345	0.518615	OK	-0.0288389	0.850293	OK	0.523273	0.000996617	OK	VPS13D	-0.328558	0.184118	-1.7845	0.0743425	0.257974	OK	0.218642	0.179084	1.2209	0.222125	0.578966	OK
ENSG00000048828.17	1975	2262	2245	2071	1364	1390	1677	1240	1983	1926	1087	1659	2237	1961	2442	1767	1484	1554	-0.181395	0.0390716	OK	-0.0123285	0.904153	OK	-0.265058	0.00858505	OK	FAM120A	-0.0589627	0.101634	-0.580146	0.561816	0.791546	OK	-0.0636036	0.107786	-0.59009	0.555131	0.846334	OK
ENSG00000048991.16	479	456	388	579	374	306	371	259	384	569	303	442	486	362	428	429	367	352	0.391565	0.0221022	OK	0.565231	0.000612275	OK	-0.0195924	0.889449	OK	R3HDM1	0.0724128	0.178757	0.40509	0.685411	0.860983	OK	-0.294064	0.179351	-1.6396	0.101089	0.393196	OK
ENSG00000049089.15	47	35	51	36	21	24	46	30	58	51	28	42	115	110	110	116	74	105	-0.630309	0.121119	OK	-0.177974	0.646612	OK	0.320379	0.252449	OK	COL9A2	0.882216	0.392492	2.24773	0.0245934	0.123643	OK	2.30208	0.34877	6.60055	4.09622e-11	4.26137e-09	OK
ENSG00000049130.16	145	219	240	104	83	85	115	78	119	90	41	92	114	117	155	72	45	65	-0.902077	0.000118381	OK	-0.476818	0.0648338	OK	-0.840491	0.0012399	OK	KITLG	-0.239042	0.268615	-0.889904	0.373518	0.651071	OK	-0.479147	0.277377	-1.72742	0.0840926	0.353468	OK
ENSG00000049167.14	90	75	78	86	47	38	69	38	95	67	32	65	87	74	87	68	63	37	-0.223867	0.472395	OK	-0.32169	0.344108	OK	-0.229348	0.449421	OK	ERCC8	-0.110986	0.33627	-0.330049	0.741363	0.892674	OK	0.0165396	0.336364	0.0491716	0.960783	0.990786	OK
ENSG00000049192.15	121	147	126	268	235	211	221	164	239	273	165	227	112	102	142	91	142	163	1.08003	1.01338e-06	OK	0.250252	0.204737	OK	0.365823	0.230094	OK	ADAMTS6	-0.337016	0.184242	-1.82921	0.0673689	0.241742	OK	-1.13265	0.256942	-4.40818	1.04242e-05	0.000351989	OK
ENSG00000049239.12	1560	1655	1600	1342	828	914	890	715	1168	955	530	868	1629	1350	1865	1115	878	958	-0.31123	0.00104636	OK	-0.341014	0.00587283	OK	-0.495829	9.88061e-06	OK	H6PD	-0.550066	0.118621	-4.63718	3.53194e-06	8.92361e-05	OK	-0.137431	0.113023	-1.21596	0.224	0.5817	OK
ENSG00000049245.13	1369	1470	1332	1447	935	972	1426	1144	1668	1785	935	1339	1502	1307	1684	1198	1014	1116	0.0207312	0.823603	OK	-0.1161	0.286896	OK	-0.0600043	0.606344	OK	VAMP3	0.210442	0.112623	1.86856	0.0616843	0.229217	OK	0.108371	0.122219	0.886694	0.375244	0.726221	OK
ENSG00000049246.14	327	280	253	492	270	271	203	151	238	362	153	220	255	237	255	371	232	248	0.510678	0.00553338	OK	0.354471	0.130502	OK	0.502686	0.00382116	OK	PER3	-0.513466	0.222437	-2.30837	0.0209785	0.111499	OK	-0.218506	0.166265	-1.31421	0.188776	0.539654	OK
ENSG00000049323.16	2107	2657	2534	2220	1600	1785	1954	1806	2934	2230	1483	2257	2790	2906	3466	2272	1977	2074	-0.0986754	0.396419	OK	-0.229931	0.0929014	OK	-0.263155	0.0154404	OK	LTBP1	0.0295012	0.121763	0.242284	0.80856	0.923167	OK	0.202778	0.116985	1.73337	0.0830299	0.350874	OK
ENSG00000049449.9	2346	2734	2630	2510	1709	1839	2611	1917	3104	3083	1632	2337	2574	2538	3337	2274	1774	2052	-0.102776	0.256357	OK	-0.205312	0.0218123	OK	-0.259203	0.0137116	OK	RCN1	0.175792	0.0970145	1.81202	0.069983	0.248012	OK	0.0240446	0.106853	0.225025	0.82196	0.952909	OK
ENSG00000049540.17	201	180	159	144	97	90	169	196	276	173	128	227	542	576	484	350	419	325	-0.489188	0.0172727	OK	-0.309372	0.272707	OK	-0.284102	0.206253	OK	ELN	0.834656	0.295673	2.8229	0.00475912	0.0382181	OK	1.91629	0.232195	8.25295	1.54528e-16	2.6652e-14	OK
ENSG00000049541.11	124	126	141	146	92	94	123	94	176	176	121	170	109	98	129	93	72	97	-0.0125593	0.955331	OK	0.167827	0.439551	OK	-0.075947	0.766374	OK	RFC2	0.406021	0.220995	1.83724	0.0661746	0.23948	OK	-0.347384	0.255811	-1.35797	0.174474	0.524393	OK
ENSG00000049618.23	802	852	818	1265	926	928	632	406	744	1031	569	899	855	780	912	881	850	901	0.728651	4.83507e-09	OK	0.543519	1.05848e-05	OK	0.341048	0.0732066	OK	ARID1B	-0.399332	0.133415	-2.99315	0.00276117	0.0246893	OK	-0.239951	0.18356	-1.30721	0.191142	0.54285	OK
ENSG00000049656.14	1004	1131	1063	950	654	636	1006	705	1102	1016	520	800	1223	1111	1308	1031	754	798	-0.426568	0.000344071	OK	-0.304432	0.00637737	OK	-0.144233	0.183412	OK	CLPTM1L	0.154723	0.126084	1.22715	0.219767	0.490017	OK	0.425702	0.128488	3.31315	0.000922505	0.0150214	OK
ENSG00000049759.18	1486	1538	1529	4216	3591	2795	1373	877	1281	1964	1015	1508	1107	997	1344	1254	1172	1168	2.06407	3.68855e-50	OK	0.637879	2.39511e-05	OK	0.361295	0.00916982	OK	NEDD4L	-1.51848	0.161587	-9.39731	5.59764e-21	9.09582e-19	OK	-1.84794	0.153979	-12.0013	3.49938e-33	1.69889e-30	OK
ENSG00000049769.14	44	54	51	66	51	58	38	21	62	55	37	47	52	38	46	61	40	57	1.37751	0.000200191	OK	0.16598	0.670077	OK	0.201952	0.624691	OK	PPP1R3F	-1.35037	0.375127	-3.59975	0.000318519	0.00445048	OK	-0.768819	0.383784	-2.00326	0.0451496	0.247228	OK
ENSG00000049860.14	1290	1632	1693	1778	1305	1319	761	591	1008	1262	751	1030	1558	1522	2104	1736	1519	1623	0.211478	0.0798604	OK	0.321928	0.00416785	OK	0.214591	0.0502094	OK	HEXB	-0.550734	0.10895	-5.05494	4.30522e-07	1.40609e-05	OK	0.196951	0.1117	1.76322	0.0778641	0.337849	OK
ENSG00000049883.15	116	122	112	94	29	46	88	85	104	92	53	66	120	78	115	64	43	47	-0.768652	0.0753866	OK	-0.676729	0.0406003	OK	-0.626593	0.0315445	OK	PTCD2	0.232647	0.448551	0.518663	0.603995	0.818469	OK	-0.0492779	0.480411	-0.102574	0.918301	0.978076	OK
ENSG00000050130.18	770	707	650	753	451	459	710	472	798	822	477	612	723	558	753	689	508	497	-0.22097	0.140309	OK	-0.12975	0.344333	OK	-0.171796	0.294611	OK	JKAMP	0.265396	0.146002	1.81776	0.0691005	0.245787	OK	0.0137677	0.169926	0.081022	0.935424	0.984695	OK
ENSG00000050165.18	8570	8640	8362	8741	5227	6084	9594	6535	9542	11617	5873	8393	10640	9402	11125	9249	7376	7915	-0.0725648	0.400222	OK	-0.0623851	0.47776	OK	-0.113421	0.191648	OK	DKK3	0.309212	0.0999131	3.09481	0.0019694	0.0190317	OK	0.287416	0.101899	2.82059	0.00479359	0.0537966	OK
ENSG00000050327.15	348	271	233	339	162	143	317	179	326	296	193	210	290	237	289	199	187	154	0.0705343	0.741474	OK	-0.331125	0.0651481	OK	-0.499967	0.00424424	OK	ARHGEF5	-0.1181	0.169652	-0.696131	0.486347	0.739879	OK	-0.467373	0.181662	-2.57276	0.0100892	0.0920952	OK
ENSG00000050344.9	366	412	352	442	320	301	724	444	635	860	417	538	332	293	320	281	239	248	0.29552	0.0460274	OK	-0.112079	0.441472	OK	-0.0550533	0.736957	OK	NFE2L3	0.601988	0.148376	4.05719	4.9667e-05	0.000909203	OK	-0.424769	0.162086	-2.62064	0.00877647	0.0834848	OK
ENSG00000050393.11	304	344	323	348	198	207	291	212	307	301	129	219	314	260	305	238	197	208	-0.132708	0.465656	OK	-0.591906	0.00228531	OK	-0.255169	0.320125	OK	MCUR1	0.129869	0.207642	0.625445	0.531679	0.773088	OK	0.00966181	0.23256	0.0415455	0.966861	0.992219	OK
ENSG00000050405.13	1871	2061	1904	3379	2312	2235	2144	1596	2369	3057	1929	2517	1795	1475	1877	2447	2200	2002	0.638025	5.68747e-12	OK	0.24058	0.00630851	OK	0.551003	2.24191e-06	OK	LIMA1	-0.0905966	0.0980691	-0.923803	0.355589	0.634439	OK	-0.213142	0.106368	-2.00382	0.0450896	0.24716	OK
ENSG00000050426.16	177	182	157	235	172	174	179	150	187	291	168	205	138	131	185	199	170	189	0.588162	0.000969297	OK	0.0932447	0.639935	OK	0.578646	0.0024433	OK	LETMD1	-0.069534	0.174242	-0.399067	0.689844	0.863234	OK	-0.186712	0.184207	-1.0136	0.310774	0.673549	OK
ENSG00000050438.17	129	110	127	131	76	60	144	82	132	157	63	79	72	82	94	71	34	51	0.381679	0.312201	OK	-0.171497	0.601632	OK	-0.696582	0.0842073	OK	SLC4A8	-0.339565	0.404434	-0.839604	0.401131	0.674666	OK	-0.966517	0.420025	-2.30109	0.0213863	0.15369	OK
ENSG00000050748.17	408	449	461	382	217	276	291	216	403	323	203	286	458	357	502	357	311	330	-0.280961	0.0699184	OK	-0.071178	0.640018	OK	-0.161949	0.344521	OK	MAPK9	-0.0197911	0.157508	-0.125651	0.900008	0.96487	OK	0.249226	0.155551	1.60221	0.109109	0.410741	OK
ENSG00000050820.17	3017	2723	2531	2343	1548	1705	2890	2009	2766	2426	1436	1846	2961	2305	2733	2275	1743	2045	-0.228512	0.0566931	OK	-0.455946	4.39113e-05	OK	-0.107407	0.414601	OK	BCAR1	0.000796489	0.113357	0.00702636	0.994394	0.998034	OK	0.113816	0.127587	0.892062	0.37236	0.724921	OK
ENSG00000051009.10	212	239	240	356	282	255	219	164	277	358	226	298	243	232	258	290	277	286	0.56749	0.000643105	OK	0.173781	0.502348	OK	0.560913	0.00101317	OK	FAM160A2	-0.157167	0.205392	-0.765206	0.444149	0.708936	OK	0.221931	0.169898	1.30626	0.191465	0.543261	OK
ENSG00000051108.15	962	1171	1220	2140	1830	1758	1197	925	1443	2288	1960	2408	1392	1289	1507	2540	3406	2777	1.05367	5.77855e-11	OK	1.07391	7.09762e-16	OK	1.35799	8.27407e-16	OK	HERPUD1	0.323967	0.149081	2.1731	0.029773	0.141193	OK	0.643725	0.181189	3.55278	0.000381183	0.00739134	OK
ENSG00000051128.19	634	645	589	785	543	541	455	282	441	555	295	451	502	478	581	554	488	519	0.203919	0.0970664	OK	-0.0188481	0.903113	OK	0.170284	0.182478	OK	HOMER3	-0.610571	0.140154	-4.35644	1.32196e-05	0.000283581	OK	-0.255456	0.133782	-1.90949	0.0561984	0.281917	OK
ENSG00000051180.17	39	20	44	43	24	24	52	20	72	80	41	52	29	20	44	25	29	34	0.0904323	0.847366	OK	0.43296	0.243671	OK	0.228773	0.604387	OK	RAD51	1.0348	0.38713	2.67301	0.00751746	0.0529399	OK	-0.0528821	0.450893	-0.117283	0.906636	0.97663	OK
ENSG00000051341.14	36	29	41	34	20	22	51	21	40	62	33	42	13	15	28	15	15	19	-0.466736	0.283418	OK	0.243687	0.520032	OK	0.0703901	0.898954	OK	POLQ	0.82261	0.382762	2.14914	0.0316232	0.147742	OK	-0.591808	0.488902	-1.21048	0.226093	0.584082	OK
ENSG00000051382.8	356	356	368	437	273	247	286	245	365	416	240	284	353	289	387	378	280	276	0.170818	0.225421	OK	0.0171043	0.910098	OK	0.257465	0.112007	OK	PIK3CB	0.112014	0.1513	0.740344	0.459092	0.72008	OK	0.0955813	0.159896	0.597773	0.549991	0.843528	OK
ENSG00000051523.11	11	20	15	27	10	21	7	19	9	29	11	32	13	15	20	31	12	26	0.386305	0.493617	OK	0.620897	0.33562	OK	0.422738	0.43779	OK	CYBA	0.248758	0.528066	0.471074	0.637588	0.837184	OK	0.0940186	0.545638	0.172309	0.863194	0.964689	OK
ENSG00000051596.9	115	88	123	109	56	73	98	60	129	104	70	100	86	80	105	72	68	51	0.00212488	0.994423	OK	0.119172	0.690109	OK	-0.259425	0.379973	OK	THOC3	0.388861	0.33709	1.15358	0.248672	0.522763	OK	-0.38136	0.344662	-1.10648	0.268521	0.630819	OK
ENSG00000051620.11	410	443	386	446	290	306	398	231	383	501	271	403	368	347	468	382	378	384	-0.163477	0.246927	OK	0.201007	0.151704	OK	0.309168	0.0356555	OK	HEBP2	0.420864	0.148196	2.83991	0.00451258	0.0365956	OK	0.358006	0.15207	2.35422	0.0185614	0.139269	OK
ENSG00000051825.15	137	159	122	220	133	124	200	92	195	255	132	170	142	105	159	106	134	118	0.85119	0.00165734	OK	0.244259	0.342884	OK	0.890935	0.000757133	OK	MPHOSPH9	0.181031	0.234994	0.770365	0.441083	0.706442	OK	-0.29126	0.266884	-1.09133	0.275126	0.636287	OK
ENSG00000052126.14	276	334	287	538	357	372	257	211	291	548	290	416	261	242	334	460	398	390	0.779527	3.7534e-08	OK	0.641361	1.23147e-05	OK	0.759548	8.95993e-08	OK	PLEKHA5	0.0288671	0.139607	0.206774	0.836186	0.935779	OK	-0.0101711	0.142027	-0.071614	0.942909	0.98601	OK
ENSG00000052723.11	292	329	304	265	145	162	259	227	352	243	145	208	349	290	353	249	193	187	0.0599742	0.741741	OK	-0.274232	0.117813	OK	0.193577	0.246333	OK	SIKE1	0.171853	0.206162	0.833583	0.404516	0.677212	OK	0.343852	0.205517	1.67311	0.0943056	0.37788	OK
ENSG00000052749.13	635	553	599	727	389	451	548	346	478	542	254	370	524	473	565	431	299	308	0.0213485	0.89655	OK	-0.358049	0.0141191	OK	-0.251699	0.102281	OK	RRP12	-0.50951	0.168614	-3.02176	0.00251313	0.0228438	OK	-0.451431	0.181449	-2.48792	0.0128493	0.108106	OK
ENSG00000052795.13	427	458	490	1102	655	663	367	249	417	1161	452	852	462	372	495	999	627	885	0.867226	1.43245e-11	OK	1.03793	8.53525e-10	OK	0.800651	9.46328e-07	OK	FNIP2	-0.156794	0.168743	-0.929187	0.352792	0.632362	OK	0.00576505	0.162969	0.0353752	0.971781	0.993913	OK
ENSG00000052802.13	3011	1061	1064	6933	2617	2788	1868	726	1270	4756	2135	3213	3457	1284	1659	6082	3416	3661	1.52802	0.00970889	OK	1.37744	3.40411e-05	OK	1.3756	0.00417653	OK	MSMO1	-0.270476	0.192459	-1.40537	0.159911	0.413585	OK	0.204167	0.209195	0.975963	0.329083	0.689296	OK
ENSG00000052841.15	814	887	867	1165	786	788	693	497	781	1025	596	883	895	783	1017	915	835	858	0.555009	7.1393e-06	OK	0.278323	0.0196713	OK	0.177581	0.107013	OK	TTC17	-0.236571	0.131401	-1.80038	0.0718007	0.252347	OK	-0.248308	0.135081	-1.83821	0.0660314	0.307474	OK
ENSG00000053254.15	478	566	552	731	434	492	363	252	356	516	294	451	573	551	708	634	486	545	0.389005	0.00182548	OK	0.322361	0.0640579	OK	0.139927	0.343195	OK	FOXN3	-0.495704	0.136849	-3.62226	0.00029204	0.00414206	OK	-0.0831806	0.147087	-0.565518	0.571722	0.854031	OK
ENSG00000053371.12	378	455	405	368	214	256	230	224	304	358	195	269	361	352	441	302	276	338	-0.293249	0.0529575	OK	-0.0653274	0.721621	OK	-0.13373	0.387713	OK	AKR7A2	-0.123212	0.165659	-0.743764	0.457019	0.718833	OK	0.0819499	0.176437	0.464472	0.642309	0.890052	OK
ENSG00000053372.5	325	365	342	322	204	218	324	224	353	338	176	259	323	310	368	279	164	267	-0.219765	0.141411	OK	-0.282422	0.0721791	OK	-0.199948	0.299474	OK	MRTO4	0.0331578	0.161293	0.205575	0.837123	0.936206	OK	0.00460634	0.205096	0.0224595	0.982081	0.996372	OK
ENSG00000053501.13	115	120	106	132	68	60	80	74	80	112	63	82	67	96	124	87	77	88	-0.158616	0.538905	OK	-0.0138898	0.958781	OK	-0.00569451	0.983467	OK	USE1	-0.123083	0.275013	-0.447553	0.654476	0.844906	OK	-0.0345149	0.277237	-0.124496	0.900922	0.974996	OK
ENSG00000053770.12	297	355	315	356	182	206	283	222	318	300	170	212	294	270	322	286	221	217	-0.108029	0.53457	OK	-0.143018	0.400084	OK	-0.0048348	0.975675	OK	AP5M1	0.0688575	0.194144	0.354672	0.722835	0.882065	OK	0.12353	0.186682	0.661716	0.508153	0.81701	OK
ENSG00000053900.10	137	141	121	132	69	69	98	75	109	110	55	81	113	107	115	75	85	86	-0.397953	0.124173	OK	-0.368204	0.157097	OK	-0.361225	0.188708	OK	ANAPC4	-0.231105	0.279081	-0.828092	0.407618	0.68007	OK	-0.205862	0.295013	-0.697806	0.485298	0.801974	OK
ENSG00000054116.12	426	460	448	536	310	342	445	276	446	573	299	474	528	403	509	425	386	407	0.143755	0.289778	OK	0.136552	0.341547	OK	0.037742	0.787499	OK	TRAPPC3	0.0915736	0.144635	0.633135	0.526646	0.768928	OK	-0.0124979	0.143062	-0.08736	0.930385	0.982873	OK
ENSG00000054118.15	1583	1592	1592	1409	792	928	1389	1020	1549	1573	802	1258	1542	1365	1816	1082	1045	1095	-0.176594	0.062038	OK	-0.223223	0.098211	OK	-0.0485939	0.655371	OK	THRAP3	0.0744371	0.135989	0.547375	0.584121	0.806128	OK	0.157694	0.109926	1.43454	0.151418	0.490624	OK
ENSG00000054148.17	590	617	542	497	382	380	492	380	548	579	416	585	586	551	613	544	465	469	-0.200696	0.116925	OK	0.0615758	0.673947	OK	-0.0516262	0.694231	OK	PHPT1	0.272434	0.15561	1.75075	0.0799885	0.270506	OK	0.188491	0.139049	1.35557	0.175236	0.524485	OK
ENSG00000054267.22	376	386	344	522	372	352	393	304	409	635	377	532	326	285	392	400	429	336	0.510259	0.00182864	OK	0.428009	0.0197124	OK	0.435149	0.0121618	OK	ARID4B	0.186986	0.168216	1.11158	0.266317	0.542191	OK	-0.246155	0.19245	-1.27906	0.200876	0.555529	OK
ENSG00000054277.14	685	656	613	634	381	444	714	522	789	828	445	598	728	632	788	633	444	447	-0.203431	0.0942245	OK	-0.199641	0.0976319	OK	-0.282234	0.0335629	OK	OPN3	0.319907	0.130835	2.44512	0.0144802	0.0859669	OK	0.106801	0.144298	0.740139	0.459215	0.786554	OK
ENSG00000054282.16	231	222	214	308	213	177	192	143	229	256	176	236	175	159	235	202	206	220	0.238355	0.155482	OK	0.352496	0.0402673	OK	0.742736	0.000349762	OK	SDCCAG8	-0.0229803	0.16735	-0.137319	0.890779	0.961037	OK	0.0292893	0.192754	0.151951	0.879225	0.968966	OK
ENSG00000054392.13	129	115	110	161	76	76	208	112	163	239	114	156	145	82	152	131	69	81	0.08299	0.748959	OK	-0.0190263	0.933305	OK	-0.236106	0.428189	OK	HHAT	0.746289	0.249282	2.99376	0.00275567	0.0246735	OK	-0.150881	0.296723	-0.508493	0.611107	0.876028	OK
ENSG00000054523.17	1539	1477	1397	3214	2008	2039	1214	854	1364	1993	1002	1658	1434	1276	1538	1872	1384	1548	1.0393	1.11561e-28	OK	0.429123	2.97788e-05	OK	0.43731	2.87135e-05	OK	KIF1B	-0.679975	0.106708	-6.37229	1.86232e-10	1.08941e-08	OK	-0.599847	0.109204	-5.4929	3.95398e-08	2.57854e-06	OK
ENSG00000054598.9	194	171	218	808	624	747	154	97	159	412	158	310	205	172	213	462	363	542	2.13478	5.6992e-40	OK	0.906017	4.13078e-06	OK	1.33994	2.11539e-13	OK	FOXC1	-1.41755	0.168948	-8.39042	4.84398e-17	5.95855e-15	OK	-0.721582	0.174955	-4.12438	3.71727e-05	0.0010828	OK
ENSG00000054611.14	358	406	369	355	223	211	272	193	337	332	199	299	351	286	377	294	242	285	-0.16597	0.276712	OK	-0.024858	0.87623	OK	-0.0936466	0.549426	OK	TBC1D22A	-0.131837	0.169134	-0.779484	0.435695	0.701299	OK	-0.0705593	0.174859	-0.40352	0.686566	0.904836	OK
ENSG00000054654.16	334	349	392	437	220	290	191	120	230	274	116	227	431	336	492	278	195	245	0.381562	0.0423707	OK	0.404939	0.133206	OK	-0.48306	0.0234971	OK	SYNE2	-0.75992	0.225483	-3.37019	0.000751168	0.00891512	OK	-0.654769	0.244381	-2.6793	0.00737766	0.073541	OK
ENSG00000054793.14	821	708	621	731	422	412	438	341	482	471	256	426	760	602	740	532	362	394	-0.222599	0.131055	OK	-0.215705	0.123982	OK	-0.479429	0.00111639	OK	ATP9A	-0.48287	0.147983	-3.26301	0.00110235	0.0121466	OK	-0.263807	0.159091	-1.65821	0.0972742	0.385334	OK
ENSG00000054965.10	1224	1360	1212	1241	821	944	779	652	1070	1004	649	1062	1318	1259	1560	1165	998	1089	-0.0244049	0.807947	OK	0.154762	0.274337	OK	-0.082566	0.477138	OK	FAM168A	-0.209209	0.142722	-1.46585	0.142689	0.387073	OK	0.0543479	0.125322	0.433667	0.664531	0.896713	OK
ENSG00000054967.13	94	72	108	166	118	132	114	71	128	184	89	170	111	81	135	145	102	130	0.801933	0.00114662	OK	0.400913	0.0799897	OK	0.406743	0.109087	OK	RELT	0.0623727	0.210784	0.295907	0.767301	0.903867	OK	-0.161233	0.239877	-0.67215	0.501488	0.813553	OK
ENSG00000054983.17	196	242	197	226	124	122	179	143	234	218	106	145	209	216	218	225	130	147	-0.105201	0.580836	OK	-0.121693	0.546765	OK	-0.134475	0.565973	OK	GALC	0.0848121	0.215656	0.393274	0.694117	0.865789	OK	0.090061	0.240143	0.37503	0.707638	0.912475	OK
ENSG00000055044.11	375	368	373	473	392	322	386	254	379	439	257	380	395	289	395	437	404	382	0.389241	0.00590499	OK	-0.0965557	0.613593	OK	0.476846	0.00231472	OK	NOP58	-0.222944	0.153911	-1.44852	0.147472	0.394517	OK	0.0463601	0.144407	0.321037	0.748183	0.927544	OK
ENSG00000055070.17	2258	2610	2310	2095	1434	1514	2082	1611	2271	2382	1270	1860	2375	2206	2606	1937	1584	1644	-0.296962	0.00252463	OK	-0.114248	0.209614	OK	-0.199371	0.0348218	OK	SZRD1	0.13654	0.100138	1.36352	0.172719	0.429904	OK	0.105478	0.103685	1.0173	0.309012	0.671348	OK
ENSG00000055130.17	679	723	702	632	391	373	495	351	610	432	296	417	681	617	743	368	409	358	-0.33625	0.00466866	OK	-0.379744	0.0082699	OK	-0.641456	4.08436e-06	OK	CUL1	-0.332048	0.144996	-2.29005	0.0220186	0.115232	OK	-0.298528	0.150819	-1.97938	0.0477728	0.256642	OK
ENSG00000055147.19	249	209	223	155	114	115	178	147	235	196	109	175	211	168	218	152	132	114	-0.610659	0.00166491	OK	-0.428438	0.0237082	OK	-0.246668	0.198259	OK	FAM114A2	0.322239	0.198756	1.62128	0.104957	0.322568	OK	0.292098	0.209711	1.39286	0.163661	0.509457	OK
ENSG00000055163.20	92	108	65	85	67	41	74	59	71	98	54	58	46	39	43	37	32	16	0.13624	0.719581	OK	-0.271392	0.450387	OK	-1.50924	0.00199912	OK	CYFIP2	0.258592	0.405366	0.637921	0.523525	0.766739	OK	-1.25658	0.489999	-2.56445	0.0103339	0.0933539	OK
ENSG00000055208.19	1236	1391	1234	2141	1498	1322	261	214	356	245	168	257	1200	1052	1463	1382	1263	1279	0.618279	1.29725e-09	OK	-0.279634	0.1237	OK	0.338951	0.0015295	OK	TAB2	-2.80567	0.14492	-19.3602	1.67386e-83	7.34376e-80	OK	-0.31276	0.111919	-2.79452	0.00519767	0.057157	OK
ENSG00000055211.14	518	606	669	573	375	449	474	422	660	685	333	555	607	579	834	638	520	550	-0.0990553	0.488031	OK	-0.0709096	0.620684	OK	-0.00529609	0.968205	OK	GINM1	0.11627	0.14365	0.809399	0.418286	0.688586	OK	0.310432	0.137542	2.257	0.0240081	0.165805	OK
ENSG00000055332.18	965	1034	1017	866	466	524	880	662	968	982	410	593	868	657	865	604	410	469	-0.39943	0.00035556	OK	-0.268884	0.0959546	OK	-0.355145	0.0280861	OK	EIF2AK2	0.165861	0.163907	1.01192	0.311574	0.590998	OK	-0.181375	0.171166	-1.05965	0.289306	0.650384	OK
ENSG00000055483.19	510	585	558	1675	1170	1318	458	341	514	1154	617	1024	497	450	574	990	1020	1015	1.64566	7.7227e-53	OK	1.21859	8.96569e-23	OK	1.22532	4.02147e-20	OK	USP36	-0.589568	0.116425	-5.06394	4.10687e-07	1.35475e-05	OK	-0.531347	0.125689	-4.22747	2.36337e-05	0.000735844	OK
ENSG00000055609.18	614	703	749	1195	952	937	583	411	595	931	544	831	696	693	853	774	854	946	0.571459	0.00141745	OK	0.537157	2.38416e-05	OK	0.316737	0.110599	OK	KMT2C	-0.315024	0.11502	-2.73886	0.00616527	0.0461121	OK	-0.0924752	0.155838	-0.593406	0.55291	0.844846	OK
ENSG00000055732.13	42	27	24	39	10	27	15	16	4	32	11	15	30	18	21	45	14	24	-0.115973	0.815642	OK	0.549601	0.425709	OK	0.633199	0.19816	OK	MCOLN3	-0.385618	0.547843	-0.703884	0.481505	0.73657	OK	0.373073	0.520627	0.716584	0.473631	0.796102	OK
ENSG00000055813.6	228	309	252	220	142	168	199	177	245	218	139	223	178	190	228	120	154	174	-0.337597	0.0590536	OK	-0.214986	0.252141	OK	-0.200619	0.381881	OK	CCDC85A	0.0890828	0.192332	0.463172	0.643241	0.840732	OK	-0.212817	0.23454	-0.907382	0.364205	0.718434	OK
ENSG00000055917.15	610	780	770	850	578	533	591	460	760	872	427	635	628	670	845	604	466	507	0.0480456	0.714466	OK	0.00543366	0.967318	OK	-0.324243	0.0373714	OK	PUM2	-0.0286265	0.133441	-0.214526	0.830137	0.93324	OK	-0.355688	0.132105	-2.69245	0.00709283	0.0714076	OK
ENSG00000055950.16	523	539	529	518	306	321	438	303	468	574	298	420	483	472	574	453	426	396	-0.220599	0.0795178	OK	0.0150704	0.910433	OK	-0.0734542	0.583955	OK	MRPL43	0.0931386	0.140699	0.661968	0.507992	0.756955	OK	0.128739	0.142935	0.900681	0.367758	0.721019	OK
ENSG00000056050.7	130	135	112	135	80	74	80	63	109	126	59	84	118	89	112	79	78	60	-0.0828122	0.713655	OK	-0.0218135	0.932991	OK	-0.270062	0.292518	OK	HPF1	-0.20929	0.255769	-0.81828	0.413197	0.68426	OK	-0.327635	0.259323	-1.26343	0.206436	0.563613	OK
ENSG00000056097.16	1359	1379	1429	1398	887	822	1053	844	1294	1262	676	958	1320	1192	1465	1097	913	864	-0.145463	0.161788	OK	-0.165103	0.184833	OK	-0.179521	0.100489	OK	ZFR	-0.115951	0.125795	-0.921743	0.356663	0.635564	OK	-0.00513883	0.118745	-0.0432763	0.965481	0.991657	OK
ENSG00000056277.16	55	79	65	80	55	69	60	20	58	90	39	70	58	29	58	61	54	51	0.233182	0.408159	OK	0.311553	0.416317	OK	0.525446	0.12332	OK	ZNF280C	-0.100438	0.293068	-0.342711	0.731816	0.886652	OK	-0.204107	0.298126	-0.684633	0.493576	0.808127	OK
ENSG00000056558.11	246	186	216	858	649	672	212	115	185	140	96	184	260	145	155	156	95	157	2.02394	4.3557e-42	OK	-0.424643	0.0767309	OK	-0.23849	0.40391	OK	TRAF1	-2.52554	0.184906	-13.6585	1.79651e-42	1.18228e-39	OK	-2.47788	0.183144	-13.5297	1.04416e-41	7.2036e-39	OK
ENSG00000056586.16	1250	1257	1318	1475	872	950	1206	917	1482	1554	699	990	1271	1017	1423	1267	828	918	0.0268498	0.790051	OK	-0.0665829	0.608613	OK	0.00440524	0.970818	OK	RC3H2	-0.0345311	0.135242	-0.255329	0.798469	0.918337	OK	-0.0183625	0.125188	-0.146679	0.883385	0.970557	OK
ENSG00000056972.20	174	171	172	244	196	180	156	120	153	315	136	198	161	142	180	183	183	155	0.464139	0.0202091	OK	0.603543	0.0291885	OK	0.3222	0.145955	OK	TRAF3IP2	0.201596	0.247345	0.815039	0.41505	0.686206	OK	-0.194645	0.193384	-1.00652	0.314167	0.675908	OK
ENSG00000057019.16	9656	10966	11354	12061	8306	8776	6311	4611	7334	8365	4338	6789	7873	7152	10903	6808	5527	6787	0.163596	0.0735753	OK	0.141209	0.0790609	OK	-0.161867	0.159657	OK	DCBLD2	-0.585154	0.0930926	-6.28572	3.26331e-10	1.80469e-08	OK	-0.597237	0.111897	-5.33741	9.42855e-08	5.72173e-06	OK
ENSG00000057252.13	405	400	379	497	309	278	365	194	301	437	173	261	310	248	334	368	240	242	0.274722	0.0997918	OK	0.0320564	0.886424	OK	0.025542	0.906291	OK	SOAT1	-0.438296	0.20816	-2.10558	0.035241	0.158796	OK	-0.511069	0.228952	-2.23221	0.0256009	0.173335	OK
ENSG00000057294.14	702	715	674	529	305	308	844	598	997	809	456	582	743	754	947	465	416	430	-0.673887	9.03144e-08	OK	-0.370203	0.00594714	OK	-0.56203	1.72073e-05	OK	PKP2	0.76737	0.151104	5.07843	3.80575e-07	1.26813e-05	OK	0.405786	0.150733	2.69209	0.00710062	0.0714312	OK
ENSG00000057608.17	2428	2619	2358	2732	1787	1899	2521	1769	2830	3267	1887	2503	2679	2187	2925	2323	2190	2082	0.0714665	0.401882	OK	0.0660338	0.473604	OK	0.0389489	0.706614	OK	GDI2	0.248707	0.0993123	2.50429	0.0122696	0.0753932	OK	0.0733023	0.106829	0.686167	0.492608	0.808095	OK
ENSG00000057663.16	242	275	298	363	266	264	229	185	268	342	226	296	268	260	319	343	326	287	0.352867	0.0529844	OK	0.307714	0.0641587	OK	0.656815	0.000136104	OK	ATG5	-0.106619	0.163651	-0.651503	0.514722	0.761466	OK	0.233486	0.173807	1.34336	0.179155	0.529137	OK
ENSG00000057704.13	63	98	81	179	134	116	62	48	66	139	113	147	95	73	96	74	87	97	1.15833	9.97349e-07	OK	0.54773	0.177698	OK	0.0344897	0.901246	OK	TMCC3	-0.122725	0.228343	-0.53746	0.59095	0.811259	OK	-0.828805	0.24959	-3.32067	0.000898008	0.0147139	OK
ENSG00000057757.10	321	317	312	426	333	298	271	190	338	409	215	334	309	305	375	393	303	356	0.412423	0.00528977	OK	0.17005	0.278257	OK	0.303625	0.0422788	OK	PITHD1	-0.217738	0.153661	-1.417	0.156484	0.409139	OK	-0.0139964	0.156907	-0.0892015	0.928922	0.982377	OK
ENSG00000057935.13	385	449	333	418	318	298	301	225	311	423	246	319	338	307	382	373	314	321	0.0500259	0.728215	OK	-0.0847917	0.597829	OK	0.0212881	0.886107	OK	MTA3	-0.0251086	0.146707	-0.171148	0.864108	0.948097	OK	-0.0485601	0.147831	-0.328485	0.742545	0.925399	OK
ENSG00000058056.9	317	282	269	245	196	152	236	134	227	288	118	185	268	188	252	182	136	146	-0.1173	0.517845	OK	-0.0459063	0.836899	OK	-0.103084	0.619631	OK	USP13	0.0955241	0.214702	0.444914	0.656382	0.846002	OK	-0.194259	0.200197	-0.970339	0.331878	0.692605	OK
ENSG00000058063.16	848	1036	987	960	575	618	756	649	1015	851	515	687	948	909	1165	785	621	577	0.0173899	0.900741	OK	-0.0662601	0.599843	OK	-0.28432	0.0209233	OK	ATP11B	-0.135311	0.139017	-0.973343	0.330383	0.610216	OK	-0.2074	0.145895	-1.42157	0.155151	0.496391	OK
ENSG00000058085.15	11	12	19	73	58	56	33	19	17	73	59	59	11	15	31	39	61	44	2.41801	2.95973e-09	OK	1.59559	0.000100858	OK	1.41122	0.00287166	OK	LAMC2	0.159385	0.31267	0.509755	0.610223	0.82285	OK	-0.370083	0.33454	-1.10624	0.268621	0.630819	OK
ENSG00000058091.17	355	410	401	449	290	290	295	271	464	368	235	405	442	509	549	425	370	397	0.255026	0.102501	OK	-0.130054	0.486105	OK	-0.0303303	0.876581	OK	CDK14	-0.26911	0.185716	-1.44904	0.147327	0.394389	OK	0.254861	0.187295	1.36075	0.173593	0.523254	OK
ENSG00000058262.10	6527	6820	6601	6539	4090	4380	6216	4450	7207	7513	4183	6108	7416	6851	8437	6415	5162	5387	-0.157126	0.0423101	OK	-0.085567	0.281662	OK	-0.186121	0.0305572	OK	SEC61A1	0.186166	0.0869259	2.14166	0.032221	0.149592	OK	0.182038	0.0936431	1.94395	0.0519011	0.270097	OK
ENSG00000058272.19	1435	1390	1414	1623	927	980	1302	923	1489	1588	875	1189	1583	1110	1579	1320	1082	1017	0.0457912	0.668429	OK	0.170689	0.124838	OK	-0.0787112	0.570885	OK	PPP1R12A	0.141826	0.11828	1.19907	0.2305	0.503576	OK	-0.0231962	0.118467	-0.195803	0.844764	0.958465	OK
ENSG00000058453.17	169	191	196	224	154	185	127	112	139	197	146	180	172	226	254	222	207	193	-0.124512	0.540965	OK	0.388081	0.11068	OK	-0.313253	0.19953	OK	CROCC	0.515056	0.231209	2.22767	0.0259028	0.128411	OK	0.318996	0.20617	1.54725	0.121803	0.437529	OK
ENSG00000058600.16	201	203	199	218	129	118	199	122	163	218	109	157	192	164	192	168	140	121	-0.0596438	0.801247	OK	0.0138417	0.948608	OK	0.274345	0.233695	OK	POLR3E	0.305536	0.249791	1.22317	0.221267	0.492175	OK	0.206315	0.267346	0.771714	0.440284	0.77223	OK
ENSG00000058668.14	3767	3678	3428	3983	2330	2386	3394	2102	3345	3823	1801	2554	3224	2766	3461	2373	1727	1959	-0.0714281	0.444511	OK	-0.265655	0.0300555	OK	-0.306325	0.00239978	OK	ATP2B4	-0.177516	0.130466	-1.36063	0.173632	0.430322	OK	-0.42284	0.114731	-3.68549	0.000228267	0.00479508	OK
ENSG00000058673.16	1178	1470	1311	1454	1042	1005	1206	893	1319	1546	796	1374	1520	1152	1910	1129	1080	1077	0.15113	0.16937	OK	0.0328213	0.78899	OK	-0.18503	0.183292	OK	ZC3H11A	-0.041495	0.129096	-0.321426	0.747887	0.89643	OK	-0.148083	0.113273	-1.30731	0.191106	0.54285	OK
ENSG00000058729.11	194	219	200	195	142	123	146	144	178	227	112	173	218	183	189	189	183	187	0.497113	0.104744	OK	0.634959	0.0251757	OK	1.17065	1.59101e-06	OK	RIOK2	0.260067	0.335497	0.775171	0.438239	0.703598	OK	0.703113	0.305015	2.30517	0.0211568	0.152695	OK
ENSG00000058799.15	190	176	163	178	141	136	157	115	190	193	116	136	189	171	213	169	129	140	0.059774	0.755137	OK	-0.0785075	0.697971	OK	-0.227182	0.239576	OK	YIPF1	-0.054672	0.20509	-0.266575	0.789796	0.915159	OK	-0.110179	0.206903	-0.532515	0.59437	0.867498	OK
ENSG00000058804.12	198	188	190	196	110	131	189	112	189	242	110	155	131	124	187	101	91	99	-0.0596878	0.768707	OK	0.0954674	0.648019	OK	-0.430614	0.0864792	OK	NDC1	0.318315	0.22671	1.40406	0.160301	0.414026	OK	-0.543723	0.243918	-2.22913	0.0258056	0.173983	OK
ENSG00000059122.16	607	610	541	645	467	511	406	254	437	519	267	409	542	490	563	606	529	565	0.2061	0.176082	OK	0.337614	0.0944993	OK	0.528757	0.00324284	OK	FLYWCH1	-0.432195	0.183524	-2.35498	0.0185236	0.102054	OK	0.2646	0.184648	1.433	0.151859	0.491133	OK
ENSG00000059145.18	159	200	196	230	161	161	176	114	236	260	121	197	125	140	178	157	123	118	0.605083	0.0531916	OK	0.061245	0.819187	OK	0.463563	0.123696	OK	UNKL	0.158649	0.333592	0.47558	0.634374	0.835426	OK	-0.172973	0.345337	-0.500881	0.616455	0.878603	OK
ENSG00000059378.12	144	171	108	113	87	79	98	63	113	138	60	86	108	79	70	107	76	69	-0.0145807	0.952995	OK	0.0958505	0.726616	OK	0.289868	0.314114	OK	PARP12	-0.167742	0.275474	-0.608922	0.542576	0.779032	OK	-0.289136	0.262053	-1.10335	0.269875	0.631294	OK
ENSG00000059573.9	2494	2796	2565	1931	1291	1422	2654	2042	3270	2364	1497	2174	2984	2586	3320	1997	1597	1668	-0.482317	1.46971e-06	OK	-0.449517	1.44019e-05	OK	-0.437752	0.000141824	OK	ALDH18A1	0.395153	0.10996	3.59359	0.000326148	0.00452823	OK	0.291284	0.12956	2.24825	0.0245604	0.168377	OK
ENSG00000059588.10	159	169	143	151	103	82	140	75	131	200	73	113	153	89	105	118	96	80	0.0629808	0.813069	OK	-0.384456	0.220771	OK	-0.0988372	0.761987	OK	TARBP1	-0.32261	0.315316	-1.02313	0.306245	0.585522	OK	-0.487408	0.309322	-1.57573	0.115088	0.423996	OK
ENSG00000059691.12	150	158	152	146	100	83	88	72	102	124	91	87	113	89	111	115	94	114	-0.307475	0.159087	OK	-0.113566	0.680645	OK	0.212336	0.355874	OK	GATB	-0.0769808	0.242727	-0.31715	0.75113	0.897455	OK	0.0933565	0.240096	0.388829	0.697402	0.908204	OK
ENSG00000059728.11	61	82	66	708	579	508	84	78	107	594	470	529	69	66	117	586	776	661	3.37474	1.08897e-66	OK	2.42485	4.7684e-32	OK	3.48207	2.1335e-52	OK	MXD1	-0.190249	0.159693	-1.19134	0.23352	0.507109	OK	0.279059	0.192992	1.44596	0.148189	0.484887	OK
ENSG00000059758.8	623	602	608	586	366	394	623	428	615	650	282	493	573	477	586	533	318	416	-0.238362	0.0497861	OK	-0.158313	0.239581	OK	-0.097227	0.514379	OK	CDK17	0.180842	0.134896	1.34061	0.180048	0.438688	OK	0.0935728	0.15462	0.605178	0.54506	0.841498	OK
ENSG00000059769.20	105	108	104	92	72	82	93	54	105	75	71	93	120	93	138	103	98	86	-0.155146	0.519335	OK	-0.151315	0.608069	OK	-0.0648493	0.778207	OK	DNAJC25	-0.078903	0.290158	-0.271931	0.785675	0.913037	OK	0.272536	0.253189	1.07642	0.281741	0.643391	OK
ENSG00000059804.16	120	160	126	727	548	575	368	230	369	1434	879	1192	172	197	220	853	889	918	2.21368	3.72806e-33	OK	1.75312	7.95646e-37	OK	2.45228	6.00744e-59	OK	SLC2A3	0.86966	0.132004	6.58812	4.45433e-11	2.8599e-09	OK	0.580281	0.139584	4.15722	3.22141e-05	0.000957511	OK
ENSG00000059915.17	64	58	61	49	40	44	81	61	82	109	60	53	72	55	63	61	36	45	-0.58359	0.108239	OK	-0.450345	0.0953557	OK	-0.474992	0.232775	OK	PSD	1.0135	0.342666	2.95768	0.00309962	0.0271982	OK	0.319687	0.436405	0.732546	0.463836	0.789179	OK
ENSG00000060069.16	258	335	265	228	121	131	233	145	243	249	155	189	256	238	296	163	191	154	-0.628168	0.000671632	OK	-0.170989	0.338333	OK	-0.438564	0.0258071	OK	CTDP1	0.260642	0.200804	1.29799	0.19429	0.457714	OK	0.110305	0.226065	0.487934	0.625597	0.88166	OK
ENSG00000060138.13	675	923	869	879	770	828	613	374	607	890	432	717	783	750	1036	850	789	936	0.29879	0.0536686	OK	0.191589	0.152355	OK	0.179892	0.193715	OK	YBX3	-0.40533	0.144138	-2.81211	0.0049218	0.0391661	OK	-0.0156595	0.144511	-0.108362	0.913708	0.977454	OK
ENSG00000060237.17	2316	2561	2497	2691	1800	1931	2409	1645	2818	3310	1764	2566	2460	2270	2815	2078	1954	1878	0.0792292	0.498912	OK	0.103353	0.381231	OK	-0.182357	0.107192	OK	WNK1	0.173307	0.115781	1.49686	0.134429	0.374706	OK	-0.12391	0.108997	-1.13682	0.255612	0.617205	OK
ENSG00000060339.14	736	864	719	986	596	573	717	497	759	813	488	643	711	637	864	552	561	529	0.0448297	0.762842	OK	0.141015	0.241759	OK	0.0156216	0.901708	OK	CCAR1	-0.0892708	0.151161	-0.590569	0.554809	0.786679	OK	0.00919153	0.159093	0.0577747	0.953928	0.988095	OK
ENSG00000060491.16	465	509	489	384	352	284	449	347	431	391	263	311	383	370	413	290	306	303	-0.251621	0.102822	OK	-0.465066	0.00204789	OK	-0.150926	0.322269	OK	OGFR	-0.16844	0.17444	-0.965607	0.334241	0.613794	OK	-0.225499	0.179813	-1.25408	0.209813	0.566402	OK
ENSG00000060642.10	138	152	151	146	112	76	105	93	145	127	71	116	119	124	120	114	86	76	-0.158948	0.566826	OK	-0.149194	0.531516	OK	-0.115117	0.634788	OK	PIGV	-0.170318	0.282296	-0.603331	0.546288	0.781718	OK	-0.510857	0.290571	-1.75811	0.0787284	0.339558	OK
ENSG00000060656.20	569	649	670	553	404	415	397	338	584	492	273	396	808	785	931	743	510	526	0.0734663	0.659529	OK	-0.235465	0.18778	OK	-0.161832	0.246049	OK	PTPRU	-0.63589	0.173574	-3.6635	0.00024879	0.00364247	OK	0.16313	0.170923	0.954405	0.339879	0.698954	OK
ENSG00000060688.13	237	274	263	169	117	126	240	154	265	244	143	170	212	185	270	172	111	147	-0.645083	0.000225977	OK	-0.360728	0.0560554	OK	-0.418125	0.0370983	OK	SNRNP40	0.384453	0.198041	1.94128	0.0522246	0.205864	OK	0.0561027	0.218336	0.256955	0.797213	0.945227	OK
ENSG00000060718.22	946	749	766	903	416	436	3523	2631	3589	4067	1903	2651	2953	2436	2180	2203	1442	1170	-0.387541	0.0594293	OK	-0.309737	0.00146197	OK	-0.638824	0.0982584	OK	COL11A1	2.32238	0.151943	15.2846	9.68813e-53	7.9697e-50	OK	1.54006	0.219931	7.00249	2.51455e-12	2.85833e-10	OK
ENSG00000060749.15	1219	1188	1228	1084	624	681	1249	730	1204	1000	454	664	1310	939	1328	838	584	631	-0.517258	0.000344617	OK	-0.647066	0.000247311	OK	-0.737539	4.52881e-09	OK	QSER1	-0.107023	0.18659	-0.573574	0.566256	0.794315	OK	-0.0353784	0.149572	-0.236531	0.813021	0.949828	OK
ENSG00000060762.19	49	79	76	45	42	62	62	46	79	76	35	61	74	59	82	70	40	63	-0.147459	0.676989	OK	-0.203967	0.497216	OK	-0.0837523	0.783373	OK	MPC1	0.106827	0.350828	0.304499	0.760748	0.901338	OK	0.195104	0.365075	0.534422	0.59305	0.866799	OK
ENSG00000060971.18	389	409	313	316	203	221	312	204	329	348	187	220	321	262	334	320	225	207	-0.35158	0.031303	OK	-0.187976	0.299522	OK	-0.115334	0.524488	OK	ACAA1	0.103667	0.18253	0.567947	0.570071	0.796918	OK	0.00249281	0.193303	0.0128959	0.989711	0.998163	OK
ENSG00000060982.15	6136	6193	6241	5992	3363	3575	4394	3980	6195	5318	2920	4503	8759	7590	9795	7004	4592	4963	-0.132642	0.172886	OK	-0.0679187	0.462151	OK	-0.23309	0.0248025	OK	BCAT1	0.0797915	0.102281	0.78012	0.43532	0.701101	OK	0.488623	0.118106	4.13714	3.51661e-05	0.00103354	OK
ENSG00000061273.18	1515	1772	1632	1864	1328	1469	1496	1049	1564	1983	1277	1649	1884	1708	2193	2038	1762	1780	0.127828	0.305322	OK	0.146981	0.117118	OK	0.165896	0.113759	OK	HDAC7	0.00864967	0.121709	0.0710684	0.943343	0.9781	OK	0.359151	0.127015	2.82764	0.0046893	0.0529434	OK
ENSG00000061337.15	48	31	37	17	6	15	57	43	60	48	25	29	58	41	80	31	17	21	-1.34242	0.00800702	OK	-0.74448	0.0333296	OK	-1.16176	0.00351381	OK	LZTS1	1.31812	0.513114	2.56887	0.010203	0.0662845	OK	0.832456	0.568215	1.46504	0.14291	0.477145	OK
ENSG00000061656.10	31	43	55	42	56	45	50	62	131	67	71	91	47	105	121	54	96	82	0.329254	0.426631	OK	-0.0713212	0.836429	OK	0.426673	0.241698	OK	SPAG4	0.559751	0.384377	1.45626	0.145322	0.39099	OK	1.03033	0.379415	2.71557	0.00661612	0.0678593	OK
ENSG00000061676.15	2211	2269	2327	2469	1472	1427	1994	1365	2216	2424	1119	1606	2084	1817	2457	1939	1370	1400	-0.115432	0.2783	OK	-0.215403	0.0466916	OK	-0.253547	0.0272423	OK	NCKAP1	-0.0959868	0.125563	-0.764454	0.444597	0.709307	OK	-0.190746	0.128975	-1.47894	0.139157	0.469625	OK
ENSG00000061794.13	347	357	349	275	202	215	284	226	394	317	205	257	340	313	390	306	257	257	-0.349192	0.022648	OK	-0.2354	0.147421	OK	-0.100627	0.493941	OK	MRPS35	0.155386	0.169183	0.91845	0.358383	0.637076	OK	0.263002	0.167267	1.57235	0.115868	0.425883	OK
ENSG00000061918.13	56	58	60	54	29	40	29	34	52	55	27	38	108	71	108	51	58	51	-0.258351	0.4278	OK	0.0346733	0.928272	OK	-0.635802	0.0251313	OK	GUCY1B1	-0.027288	0.363487	-0.0750729	0.940157	0.977897	OK	0.394766	0.341568	1.15575	0.247785	0.609685	OK
ENSG00000061936.9	437	418	439	473	314	323	338	231	364	427	257	357	437	348	488	330	326	334	0.0473783	0.717701	OK	0.176611	0.271806	OK	-0.167438	0.261292	OK	SFSWAP	-0.104611	0.156613	-0.667962	0.504158	0.75406	OK	-0.206139	0.154148	-1.33729	0.18113	0.530943	OK
ENSG00000061938.19	599	689	571	655	529	482	693	428	635	830	549	701	690	665	776	680	687	641	0.0744227	0.637797	OK	0.239555	0.116201	OK	0.184743	0.120331	OK	TNK2	0.404084	0.151496	2.66729	0.00764665	0.0536203	OK	0.362121	0.145158	2.49468	0.0126072	0.106962	OK
ENSG00000061987.16	564	625	631	821	480	542	565	440	686	744	379	648	574	533	817	562	529	512	0.349679	0.00402808	OK	-0.123366	0.435032	OK	-0.0785976	0.660066	OK	MON2	-0.0748285	0.164953	-0.453635	0.650092	0.842947	OK	-0.152596	0.153395	-0.994791	0.319838	0.681419	OK
ENSG00000062194.16	410	415	442	789	621	554	366	266	425	563	343	493	448	401	530	451	488	472	1.01645	1.47565e-11	OK	0.362508	0.00850591	OK	0.306452	0.0525279	OK	GPBP1	-0.566612	0.144553	-3.91974	8.86453e-05	0.00151329	OK	-0.501462	0.162505	-3.08583	0.00202986	0.028156	OK
ENSG00000062282.15	66	33	33	60	28	23	52	26	52	61	41	52	35	24	27	50	28	17	0.125508	0.785812	OK	0.427336	0.244654	OK	0.848381	0.130922	OK	DGAT2	0.536777	0.419313	1.28013	0.200498	0.466167	OK	0.0944383	0.573539	0.164659	0.869213	0.96695	OK
ENSG00000062370.16	86	120	77	57	43	30	60	40	63	81	59	63	80	63	91	54	69	43	-0.913118	0.00260253	OK	0.330821	0.26339	OK	-0.0833783	0.812335	OK	ZNF112	0.71397	0.318991	2.23822	0.025207	0.125767	OK	0.580286	0.39309	1.47622	0.139886	0.471126	OK
ENSG00000062485.19	1711	1679	1584	1965	1195	1218	1626	1118	1721	2123	1016	1454	1589	1365	1595	1464	1202	1104	0.0123176	0.902892	OK	-0.0789277	0.498896	OK	0.0130614	0.911835	OK	CS	0.0380703	0.124126	0.306708	0.759066	0.900967	OK	-0.107449	0.122974	-0.873756	0.382251	0.730364	OK
ENSG00000062582.14	346	366	303	529	361	364	263	186	251	332	193	258	228	243	244	273	191	225	0.532833	0.000118538	OK	0.0331222	0.837771	OK	0.12544	0.481088	OK	MRPS24	-0.746575	0.144935	-5.1511	2.58959e-07	8.92255e-06	OK	-0.881036	0.158404	-5.56194	2.66791e-08	1.8214e-06	OK
ENSG00000062598.18	394	421	402	444	253	303	369	277	398	444	230	336	435	380	440	393	316	274	0.00193691	0.990733	OK	-0.163718	0.260312	OK	-0.0420736	0.796212	OK	ELMO2	-0.0214224	0.174233	-0.122953	0.902144	0.965592	OK	0.0916966	0.188256	0.487086	0.626198	0.881804	OK
ENSG00000062650.19	1029	1132	1064	1289	820	822	925	701	1106	1233	651	961	1076	926	1295	1026	889	931	0.15929	0.13436	OK	-0.0122855	0.91393	OK	0.0211642	0.84382	OK	WAPL	-0.101554	0.122206	-0.831011	0.405967	0.67852	OK	-0.083978	0.118996	-0.705718	0.480363	0.79967	OK
ENSG00000062716.13	1655	1791	1587	1852	1370	1610	1468	1247	1820	1612	1083	1390	1737	1636	2033	1789	1258	1689	0.343918	0.00342287	OK	-0.134568	0.310249	OK	0.167902	0.128838	OK	VMP1	-0.343309	0.148407	-2.31329	0.0207065	0.110474	OK	-0.0321025	0.127035	-0.252705	0.800496	0.946732	OK
ENSG00000062725.10	546	615	577	629	426	365	451	414	576	525	269	428	548	480	571	463	332	398	0.099936	0.40569	OK	-0.129285	0.37726	OK	0.144164	0.27378	OK	APPBP2	-0.170036	0.134234	-1.26671	0.205259	0.47198	OK	-0.0373225	0.140097	-0.266405	0.789927	0.942672	OK
ENSG00000062822.14	133	146	152	107	82	77	146	112	167	199	94	141	111	104	122	82	70	81	-0.381025	0.0907442	OK	-0.339225	0.115285	OK	-0.156868	0.544502	OK	POLD1	0.506647	0.239618	2.11439	0.0344816	0.156331	OK	-0.0485945	0.268752	-0.180815	0.856513	0.962053	OK
ENSG00000063046.17	6014	7215	6486	8598	5872	6049	5644	4261	6155	8452	4589	6509	5033	5000	6638	6326	5563	5903	0.336784	3.11196e-05	OK	0.247251	0.00234166	OK	0.355437	0.000225563	OK	EIF4B	-0.0755087	0.087973	-0.858317	0.390717	0.665495	OK	-0.171707	0.0932697	-1.84098	0.0656251	0.307135	OK
ENSG00000063169.10	209	216	272	264	212	263	261	163	237	381	197	273	198	238	314	313	288	295	0.276754	0.211661	OK	0.288983	0.137186	OK	0.444802	0.0321093	OK	BICRA	0.292595	0.199268	1.46835	0.14201	0.38623	OK	0.367322	0.182531	2.01238	0.0441804	0.24481	OK
ENSG00000063176.16	155	140	129	167	103	127	130	71	129	203	122	156	122	112	132	126	108	126	0.152142	0.478896	OK	0.475482	0.0374604	OK	0.181674	0.439874	OK	SPHK2	0.153615	0.208346	0.737305	0.460937	0.720949	OK	-0.0792735	0.234773	-0.337661	0.735619	0.921404	OK
ENSG00000063177.13	3241	3648	3491	3483	2616	2883	3155	2478	3508	4094	2706	3588	2991	3230	3669	3392	3362	3374	0.0672163	0.489715	OK	0.0883202	0.372495	OK	0.241306	0.0217435	OK	RPL18	0.123243	0.112363	1.09682	0.27272	0.549784	OK	0.138372	0.114573	1.20772	0.227155	0.585504	OK
ENSG00000063180.9	335	320	286	354	199	221	104	119	198	161	110	183	258	258	262	246	190	200	0.0418213	0.80648	OK	0.253233	0.367082	OK	-0.0258723	0.905084	OK	CA11	-0.675883	0.232243	-2.91024	0.00361153	0.0306913	OK	-0.293835	0.193144	-1.52132	0.128178	0.449001	OK
ENSG00000063241.8	400	425	399	411	263	267	426	317	374	472	251	381	525	461	521	459	376	339	-0.134832	0.317776	OK	-0.189672	0.214976	OK	-0.175199	0.237725	OK	ISOC2	0.121683	0.145275	0.837603	0.402254	0.675197	OK	0.302545	0.155776	1.94218	0.0521152	0.270652	OK
ENSG00000063244.12	1542	1747	1575	1691	1197	1284	1306	978	1436	1767	1035	1398	1486	1418	1715	1469	1322	1425	0.00128386	0.990788	OK	-0.0363215	0.735833	OK	0.0020066	0.983796	OK	U2AF2	-0.100645	0.124953	-0.805467	0.420551	0.689404	OK	-0.0641048	0.119678	-0.535642	0.592206	0.866559	OK
ENSG00000063245.14	1610	1866	1815	1656	1364	1393	1443	1251	1681	2040	1184	1702	1654	1800	2161	1796	1574	1679	-0.0475848	0.673965	OK	0.0595419	0.615492	OK	0.0357186	0.736736	OK	EPN1	0.100038	0.117402	0.852091	0.394163	0.668382	OK	0.140677	0.122719	1.14634	0.251656	0.612807	OK
ENSG00000063322.15	594	674	624	600	438	418	468	351	489	551	333	470	614	434	646	525	483	475	-0.11374	0.344824	OK	-0.0434879	0.738863	OK	0.0596108	0.673609	OK	MED29	-0.183866	0.133211	-1.38025	0.167509	0.423351	OK	0.0260941	0.133294	0.195764	0.844795	0.958465	OK
ENSG00000063438.17	24	46	65	23	20	24	19	20	30	11	14	21	26	30	28	13	8	29	-0.587911	0.23383	OK	-0.0696162	0.895568	OK	-0.998625	0.0661726	OK	AHRR	-0.360893	0.538949	-0.669625	0.503097	0.753072	OK	-0.865114	0.576348	-1.50103	0.133348	0.458686	OK
ENSG00000063587.14	312	346	317	319	229	238	416	298	437	425	238	406	423	322	457	347	277	335	-0.0471645	0.748362	OK	-0.18754	0.200036	OK	-0.0897307	0.555744	OK	ZNF275	0.376129	0.160893	2.33776	0.0193998	0.105382	OK	0.28069	0.162558	1.7267	0.084221	0.353723	OK
ENSG00000063601.17	437	506	477	510	348	351	346	241	428	429	254	302	437	373	532	390	353	307	-0.0143767	0.913829	OK	-0.205658	0.180779	OK	-0.185053	0.194236	OK	MTMR1	-0.329162	0.151792	-2.16851	0.0301198	0.142552	OK	-0.160428	0.151714	-1.05744	0.290312	0.651387	OK
ENSG00000063660.9	3434	3666	3707	2932	1940	2262	4026	2721	3585	4663	2320	3227	4139	4030	4620	3363	2824	3093	-0.284433	0.00189748	OK	-0.1559	0.142565	OK	-0.240821	0.00630412	OK	GPC1	0.393003	0.104983	3.74349	0.000181484	0.00280362	OK	0.350304	0.102118	3.43038	0.000602742	0.010686	OK
ENSG00000063761.16	60	31	33	46	24	26	34	23	33	31	25	29	49	43	43	30	29	26	-0.239935	0.603914	OK	-0.429822	0.294579	OK	-0.956417	0.0125063	OK	ADCK1	-0.497682	0.406608	-1.22399	0.220958	0.49159	OK	-0.82283	0.4089	-2.0123	0.0441882	0.24481	OK
ENSG00000063854.13	255	273	271	292	187	224	242	207	319	327	254	301	221	265	307	258	249	248	0.0453177	0.81093	OK	0.0473027	0.816394	OK	0.106187	0.538109	OK	HAGH	0.280897	0.219947	1.27711	0.201562	0.467648	OK	0.0984897	0.190295	0.517564	0.604762	0.873042	OK
ENSG00000063978.16	844	862	755	721	579	525	646	482	759	843	435	659	835	721	924	771	663	701	-0.185956	0.131418	OK	-0.0600342	0.607921	OK	0.0319503	0.778229	OK	RNF4	0.0287582	0.133027	0.216183	0.828845	0.932681	OK	0.226429	0.134826	1.67942	0.0930702	0.375605	OK
ENSG00000064012.21	58	56	47	62	50	51	44	36	66	79	38	56	52	33	38	46	41	51	0.222782	0.494028	OK	0.285204	0.4185	OK	0.259694	0.481627	OK	CASP8	0.15443	0.320484	0.481864	0.629902	0.832742	OK	-0.447893	0.335838	-1.33366	0.182316	0.532252	OK
ENSG00000064042.18	1621	1713	1861	1661	1032	1207	1573	1237	1949	1826	991	1410	2302	2081	2839	1639	1260	1477	0.0308376	0.756279	OK	-0.112933	0.271861	OK	-0.459341	0.000178843	OK	LIMCH1	-0.0259583	0.109902	-0.236195	0.813282	0.925347	OK	0.0286923	0.11869	0.241743	0.80898	0.948998	OK
ENSG00000064102.15	339	358	279	447	296	253	334	245	352	475	337	428	324	256	343	270	347	271	0.242505	0.0826054	OK	0.391048	0.0168947	OK	0.276374	0.11283	OK	INTS13	0.410891	0.163131	2.51878	0.0117763	0.0731131	OK	-0.154592	0.174475	-0.886041	0.375595	0.726258	OK
ENSG00000064115.11	903	985	856	992	567	576	1127	741	1173	1357	694	969	961	813	945	911	566	611	-0.133232	0.459574	OK	-0.0611236	0.595578	OK	-0.0849901	0.64695	OK	TM7SF3	0.37238	0.181712	2.04929	0.0404338	0.174374	OK	0.0810749	0.223561	0.362652	0.716865	0.915592	OK
ENSG00000064199.6	63	95	80	87	42	32	74	56	74	76	46	76	81	46	57	54	48	52	-0.4452	0.158383	OK	-0.171339	0.549733	OK	0.370964	0.30275	OK	SPA17	0.476099	0.328179	1.45073	0.146854	0.393826	OK	0.327755	0.350146	0.936052	0.349247	0.707289	OK
ENSG00000064225.12	123	139	116	146	121	111	69	72	103	115	79	118	107	109	131	126	106	119	0.435546	0.0542818	OK	0.769791	0.00322341	OK	0.452187	0.09058	OK	ST3GAL6	0.0827637	0.236843	0.349445	0.726755	0.884169	OK	0.0690085	0.252031	0.273809	0.784231	0.940412	OK
ENSG00000064300.9	15	13	6	210	197	142	4	0	1	171	103	159	8	3	4	213	242	178	4.28341	4.27685e-33	OK	6.33681	2.06778e-19	OK	5.41884	8.53473e-34	OK	NGFR	-0.443705	0.218231	-2.03319	0.0420331	0.178522	OK	0.166055	0.222439	0.746521	0.455353	0.784459	OK
ENSG00000064309.14	109	103	138	144	89	94	85	73	126	134	72	107	118	96	127	105	86	96	0.494432	0.0509145	OK	0.176306	0.533701	OK	-0.027084	0.914956	OK	CDON	-0.432124	0.289024	-1.49512	0.134884	0.37546	OK	-0.785604	0.264811	-2.96666	0.00301056	0.0373697	OK
ENSG00000064313.12	413	387	418	491	248	274	291	219	316	325	171	278	353	309	369	305	207	240	0.0463301	0.782986	OK	-0.162494	0.34214	OK	-0.228207	0.147248	OK	TAF2	-0.465784	0.174795	-2.66474	0.00770473	0.0538268	OK	-0.512564	0.169428	-3.02526	0.00248423	0.0328591	OK
ENSG00000064393.16	1374	1556	1527	1631	960	1055	1138	749	1136	1342	582	952	1461	1198	1690	1049	733	963	-0.0262245	0.807118	OK	-0.137105	0.315377	OK	-0.402532	0.00207902	OK	HIPK2	-0.387207	0.139242	-2.78081	0.00542228	0.0417846	OK	-0.368523	0.132537	-2.78053	0.00542701	0.0587425	OK
ENSG00000064419.13	694	665	617	761	468	439	619	394	646	777	383	562	655	534	692	627	511	497	-0.0304202	0.820491	OK	-0.0209624	0.869277	OK	-0.00532772	0.966087	OK	TNPO3	0.00516491	0.138108	0.0373976	0.970168	0.988952	OK	-0.01161	0.138826	-0.0836296	0.933351	0.983588	OK
ENSG00000064489.23	15	13	42	55	28	19	16	3	7	9	23	27	22	20	37	46	27	37	0.889573	0.113388	OK	0.939625	0.21679	OK	0.674271	0.111861	OK	BORCS8-MEF2B	-0.983473	0.593435	-1.65726	0.0974678	0.308086	OK	-0.159156	0.468973	-0.339371	0.73433	0.921049	OK
ENSG00000064490.14	330	313	334	355	219	218	253	193	305	320	201	251	368	299	339	287	269	234	-0.288675	0.102297	OK	-0.123094	0.491582	OK	-0.229407	0.151756	OK	RFXANK	-0.0964677	0.202279	-0.476904	0.633431	0.834888	OK	0.018329	0.18885	0.0970558	0.922682	0.979868	OK
ENSG00000064545.15	180	163	165	139	146	115	153	106	141	179	117	130	166	173	182	158	142	150	0.0226412	0.934107	OK	-0.0815557	0.723034	OK	0.31865	0.159743	OK	TMEM161A	0.0443321	0.286975	0.154481	0.87723	0.954243	OK	0.328068	0.283948	1.15538	0.247935	0.609685	OK
ENSG00000064547.14	29	9	16	25	9	17	23	17	11	30	25	32	16	15	24	30	15	19	0.616741	0.296799	OK	0.696513	0.175459	OK	0.151479	0.76381	OK	LPAR2	0.731112	0.483386	1.51248	0.130412	0.367633	OK	0.152574	0.52422	0.291051	0.771013	0.935694	OK
ENSG00000064601.18	3748	4272	4204	3959	2922	3209	3062	2454	3829	3757	2362	3598	4135	3991	5191	3939	3473	3860	0.00543443	0.956638	OK	0.03063	0.770694	OK	-0.00776248	0.937199	OK	CTSA	-0.104325	0.112663	-0.925988	0.354452	0.633614	OK	0.127761	0.110437	1.15687	0.247326	0.609389	OK
ENSG00000064607.17	793	879	872	810	596	623	670	467	699	760	431	608	734	733	891	649	599	643	-0.139676	0.243362	OK	-0.209754	0.101366	OK	-0.175068	0.168328	OK	SUGP2	-0.212094	0.135708	-1.56287	0.118083	0.346298	OK	-0.101427	0.136961	-0.740551	0.458966	0.786554	OK
ENSG00000064651.14	465	486	527	355	217	233	384	212	437	309	164	212	540	353	561	347	217	224	-0.444433	0.00909923	OK	-0.257095	0.173586	OK	-0.489774	0.0422643	OK	SLC12A2	-0.12559	0.191452	-0.655988	0.511832	0.759839	OK	0.0787637	0.255369	0.30843	0.757755	0.931008	OK
ENSG00000064652.11	168	180	174	224	126	134	157	111	185	277	142	198	161	160	186	197	136	153	0.224773	0.217775	OK	0.381057	0.0730799	OK	0.369066	0.0625095	OK	SNX24	0.292351	0.198994	1.46914	0.141794	0.385917	OK	0.0522538	0.196818	0.265492	0.79063	0.942672	OK
ENSG00000064666.15	13708	13396	12380	11911	7870	7813	11685	9029	13359	13817	8263	11029	14559	12258	14271	12866	10502	9829	-0.275734	0.00116255	OK	-0.145863	0.0686573	OK	-0.103986	0.306927	OK	CNN2	0.185768	0.0867222	2.14211	0.0321847	0.149592	OK	0.249499	0.102741	2.42842	0.0151649	0.120474	OK
ENSG00000064687.12	578	569	492	544	335	336	345	201	299	366	177	286	516	375	407	479	243	226	-0.317269	0.166614	OK	0.135794	0.488183	OK	0.189634	0.261856	OK	ABCA7	-0.494804	0.207136	-2.38879	0.0169042	0.0957632	OK	-0.157332	0.179802	-0.875027	0.381559	0.730122	OK
ENSG00000064703.12	168	156	165	87	65	45	180	108	197	140	65	85	170	105	172	67	63	59	-0.976845	6.44086e-05	OK	-0.934007	3.02484e-05	OK	-0.886589	0.00073447	OK	DDX20	0.431389	0.283779	1.52016	0.12847	0.364139	OK	-0.00476725	0.306485	-0.0155546	0.98759	0.997443	OK
ENSG00000064726.10	974	1081	1026	936	643	677	769	598	983	900	451	793	961	920	1028	833	677	699	-0.201927	0.0530717	OK	-0.185269	0.146398	OK	-0.157114	0.173943	OK	BTBD1	-0.0811044	0.131474	-0.616885	0.537311	0.775438	OK	0.0382851	0.120123	0.318716	0.749942	0.927788	OK
ENSG00000064763.11	72	62	81	62	37	40	90	57	87	107	49	56	83	72	88	60	27	42	-0.0546821	0.874535	OK	-0.185701	0.5656	OK	-0.7071	0.0727874	OK	FAR2	0.622078	0.328764	1.89217	0.0584678	0.221896	OK	-0.101246	0.394059	-0.256931	0.797232	0.945227	OK
ENSG00000064932.16	804	824	807	651	587	554	638	447	692	655	342	552	677	585	693	480	430	445	0.0253894	0.832832	OK	-0.213441	0.0721538	OK	-0.517132	8.5361e-05	OK	SBNO2	-0.385146	0.13343	-2.88651	0.00389546	0.0325951	OK	-0.495466	0.146595	-3.37983	0.000725303	0.0124116	OK
ENSG00000064933.17	109	121	103	107	89	92	95	80	105	84	77	88	104	68	117	75	84	80	0.220551	0.338039	OK	-0.210658	0.473457	OK	0.127256	0.678346	OK	PMS1	-0.252715	0.28393	-0.890062	0.373433	0.651069	OK	-0.444928	0.293124	-1.51789	0.129043	0.450778	OK
ENSG00000064961.19	876	921	798	897	526	560	607	437	657	798	420	574	807	705	783	770	630	623	-0.227148	0.0678787	OK	-0.010812	0.927576	OK	0.0532415	0.677542	OK	HMG20B	-0.163988	0.13359	-1.22755	0.219618	0.48985	OK	0.097002	0.137275	0.706624	0.4798	0.799138	OK
ENSG00000064995.18	233	265	237	260	151	150	201	175	217	235	121	199	199	214	259	203	198	222	-0.142389	0.408907	OK	-0.195063	0.299613	OK	0.107989	0.559885	OK	TAF11	-0.0656637	0.190722	-0.34429	0.730628	0.886305	OK	0.186623	0.189429	0.98519	0.324531	0.685412	OK
ENSG00000064999.15	231	260	263	310	213	183	227	185	247	295	152	211	318	262	318	210	189	206	0.19484	0.261605	OK	-0.119416	0.491959	OK	-0.367362	0.024671	OK	ANKS1A	-0.239294	0.182985	-1.30773	0.190966	0.45366	OK	-0.255091	0.184334	-1.38385	0.166404	0.512625	OK
ENSG00000065000.18	2408	2551	2375	2418	1492	1698	2140	1496	2254	2253	1252	1946	2508	2334	2974	1933	1567	1749	-0.116232	0.201898	OK	-0.0943876	0.323788	OK	-0.391479	4.33537e-05	OK	AP3D1	-0.056663	0.10782	-0.525535	0.599212	0.816172	OK	-0.211409	0.109548	-1.92982	0.0536288	0.275349	OK
ENSG00000065029.15	258	272	223	291	167	212	194	134	212	248	152	210	233	191	295	204	198	196	0.074515	0.688785	OK	0.142366	0.454092	OK	-0.00915905	0.959202	OK	ZNF76	-0.14541	0.195037	-0.745547	0.455941	0.718164	OK	-0.227271	0.1969	-1.15425	0.248398	0.610081	OK
ENSG00000065054.14	524	519	478	490	296	301	572	367	518	639	325	451	504	484	510	417	366	351	-0.263348	0.0517204	OK	-0.187303	0.202155	OK	-0.240128	0.0926359	OK	SLC9A3R2	0.307506	0.150908	2.03771	0.0415793	0.177281	OK	0.0175048	0.15258	0.114726	0.908662	0.976712	OK
ENSG00000065057.9	54	50	40	60	41	43	41	19	30	34	29	28	32	31	23	36	25	33	0.170315	0.599587	OK	-0.179005	0.689959	OK	0.25327	0.541652	OK	NTHL1	-0.711256	0.369484	-1.925	0.0542293	0.210458	OK	-0.683937	0.356303	-1.91954	0.054916	0.278298	OK
ENSG00000065060.17	318	371	458	336	209	211	276	261	470	296	158	264	329	489	613	243	194	233	-0.353495	0.0470782	OK	-0.552601	0.00392122	OK	-0.859206	4.82042e-05	OK	UHRF1BP1	-0.124887	0.168801	-0.739849	0.459392	0.72008	OK	-0.164449	0.170983	-0.961788	0.336156	0.695664	OK
ENSG00000065135.11	1039	1037	1007	1337	829	801	897	723	1162	1082	686	1007	1062	861	1109	977	890	833	0.188341	0.0734743	OK	-0.0554823	0.635702	OK	0.0734197	0.507347	OK	GNAI3	-0.109345	0.119402	-0.915778	0.359783	0.63829	OK	-0.099707	0.118045	-0.844656	0.398303	0.742351	OK
ENSG00000065150.21	1971	2051	1974	2244	1320	1368	1846	1152	1971	2152	1043	1474	1767	1552	2162	1331	1130	1230	0.0122592	0.8891	OK	-0.107647	0.310662	OK	-0.275428	0.00848893	OK	IPO5	-0.109782	0.100355	-1.09394	0.273983	0.551212	OK	-0.406157	0.107713	-3.77074	0.000162763	0.0036848	OK
ENSG00000065154.11	1532	1659	1639	1410	861	1017	1488	1158	1878	1594	972	1275	1662	1598	2058	1289	976	1107	-0.295093	0.00329267	OK	-0.279539	0.00722452	OK	-0.422756	0.000136833	OK	OAT	0.196724	0.110877	1.77426	0.0760204	0.261802	OK	0.0525523	0.120903	0.434665	0.663805	0.896385	OK
ENSG00000065183.16	394	393	415	267	156	150	380	252	391	237	161	200	379	307	390	181	152	174	-0.733491	1.11748e-05	OK	-1.01218	4.44664e-06	OK	-0.7204	1.67083e-05	OK	WDR3	-0.045255	0.222002	-0.20385	0.838471	0.936599	OK	-0.213843	0.197046	-1.08524	0.277815	0.638551	OK
ENSG00000065243.20	436	429	511	570	388	386	338	264	450	431	259	403	399	354	478	432	328	329	0.171234	0.239497	OK	0.0210236	0.89503	OK	0.15135	0.28925	OK	PKN2	-0.298181	0.15213	-1.96004	0.0499908	0.200419	OK	-0.219834	0.157706	-1.39395	0.163333	0.508907	OK
ENSG00000065268.10	313	363	359	236	171	226	263	198	279	300	163	250	320	302	332	257	218	244	-0.369628	0.036305	OK	-0.173345	0.297967	OK	-0.122559	0.45562	OK	WDR18	0.0519053	0.194205	0.267271	0.789261	0.914986	OK	0.17013	0.199442	0.853034	0.393641	0.739223	OK
ENSG00000065308.5	9530	9797	9875	10859	6751	7573	7530	5270	8753	10032	5641	8420	11206	9674	12738	10376	8494	9439	0.0382745	0.643746	OK	0.0893595	0.268788	OK	-0.011209	0.896703	OK	TRAM2	-0.125119	0.0895471	-1.39724	0.162342	0.416328	OK	0.171398	0.0966888	1.77268	0.0762816	0.334302	OK
ENSG00000065328.16	39	57	73	38	23	36	80	29	64	83	25	47	29	27	64	16	13	25	-0.514095	0.191356	OK	-0.221136	0.571844	OK	-0.922988	0.0482594	OK	MCM10	0.566059	0.396775	1.42665	0.153681	0.405361	OK	-0.79965	0.476983	-1.67647	0.0936455	0.376802	OK
ENSG00000065357.20	451	485	434	418	263	261	530	323	460	544	270	347	456	454	518	368	334	308	-0.0686051	0.756437	OK	-0.218808	0.294041	OK	-0.404573	0.0288631	OK	DGKA	0.195007	0.248113	0.78596	0.431891	0.69858	OK	0.0709715	0.235561	0.301288	0.763195	0.933031	OK
ENSG00000065413.20	95	92	83	120	63	52	74	48	83	96	54	72	82	80	80	81	75	67	1.44369	0.127511	OK	0.274318	0.491192	OK	0.929003	0.0012098	OK	ANKRD44	-1.33863	0.936525	-1.42936	0.1529	0.404273	OK	-1.0231	0.884312	-1.15695	0.247293	0.609389	OK
ENSG00000065427.14	953	972	943	922	640	650	898	591	977	1044	547	862	895	829	978	778	687	744	-0.140753	0.176785	OK	-0.0729534	0.52508	OK	-0.0453521	0.680676	OK	KARS	0.0651214	0.11887	0.547836	0.583804	0.805961	OK	-0.00927004	0.117931	-0.0786058	0.937346	0.984877	OK
ENSG00000065457.10	129	124	119	133	84	76	117	82	129	140	71	95	99	126	140	77	65	52	-0.0366233	0.878719	OK	-0.261481	0.293812	OK	-0.488452	0.0515481	OK	ADAT1	-0.254367	0.270664	-0.939788	0.347326	0.627351	OK	-0.424661	0.27798	-1.52766	0.126596	0.44668	OK
ENSG00000065485.20	212	288	288	172	167	210	311	311	559	405	326	450	416	453	659	339	414	448	-0.13848	0.557701	OK	0.0763716	0.741666	OK	-0.195408	0.307869	OK	PDIA5	1.09453	0.238275	4.59354	4.35799e-06	0.000106815	OK	1.01833	0.22978	4.43176	9.34665e-06	0.000324456	OK
ENSG00000065491.8	154	173	174	348	254	267	151	108	166	256	135	229	170	129	174	191	197	139	1.06255	1.76957e-10	OK	0.458812	0.0150838	OK	0.395653	0.0627611	OK	TBC1D22B	-0.570378	0.170496	-3.34541	0.000821619	0.00963683	OK	-0.733444	0.192446	-3.81117	0.000138311	0.0032317	OK
ENSG00000065518.8	402	491	417	392	311	262	438	318	438	479	300	415	380	406	444	380	342	383	-0.19586	0.191082	OK	-0.102336	0.462439	OK	0.0697586	0.642344	OK	NDUFB4	0.242719	0.156024	1.55565	0.119792	0.349067	OK	0.215905	0.163146	1.32338	0.185708	0.536915	OK
ENSG00000065526.11	1918	2091	2294	2538	1992	2202	1325	960	1696	1939	1109	1913	2031	1910	2484	2186	2369	2675	0.425872	0.000427554	OK	0.432453	0.00355807	OK	0.508299	0.000167718	OK	SPEN	-0.335356	0.141811	-2.3648	0.0180398	0.100017	OK	0.19331	0.153401	1.26016	0.207612	0.564672	OK
ENSG00000065534.18	10160	9523	7863	9774	5076	4836	8128	5228	8007	8821	4478	6192	7950	6042	7450	5679	4092	4004	-0.237441	0.0630059	OK	-0.250341	0.017375	OK	-0.473025	0.00104309	OK	MYLK	-0.0373632	0.133641	-0.279579	0.7798	0.910266	OK	-0.482954	0.162497	-2.97208	0.00295786	0.0369406	OK
ENSG00000065548.18	587	560	546	631	417	442	493	383	569	623	356	519	496	445	554	469	424	460	0.061163	0.620711	OK	-0.043122	0.729065	OK	0.140074	0.310235	OK	ZC3H15	-0.028292	0.129122	-0.21911	0.826564	0.931891	OK	-0.0833875	0.144256	-0.578051	0.563229	0.848232	OK
ENSG00000065559.15	505	548	476	569	355	345	449	351	490	527	266	418	559	453	650	443	346	394	-0.0551851	0.729685	OK	-0.275161	0.0602184	OK	-0.231625	0.139938	OK	MAP2K4	-0.124676	0.157184	-0.793185	0.42767	0.695104	OK	-0.0315336	0.168415	-0.187238	0.851474	0.960571	OK
ENSG00000065600.12	85	82	72	99	69	55	100	51	86	102	69	81	61	73	72	91	64	64	0.0681961	0.818449	OK	-0.427826	0.146612	OK	0.506163	0.0829533	OK	PACC1	0.104391	0.308628	0.338243	0.73518	0.889297	OK	-0.134191	0.31446	-0.426736	0.669572	0.899278	OK
ENSG00000065613.15	1196	1204	1207	1239	914	791	1004	660	1056	1070	481	783	1240	975	1270	856	684	747	0.0309995	0.787546	OK	-0.215068	0.199466	OK	-0.376342	0.00554587	OK	SLK	-0.290126	0.173229	-1.67481	0.0939718	0.301232	OK	-0.263045	0.134753	-1.95206	0.0509315	0.266937	OK
ENSG00000065615.14	94	105	106	73	49	62	64	48	78	96	29	61	88	66	107	50	49	69	-0.870237	0.00188927	OK	0.202608	0.674709	OK	-0.297495	0.477279	OK	CYB5R4	0.243952	0.448115	0.544395	0.58617	0.807448	OK	0.220987	0.423709	0.521554	0.601981	0.871859	OK
ENSG00000065665.21	58	57	43	48	28	29	46	41	84	66	30	45	64	56	59	41	41	31	-0.402928	0.254919	OK	-0.274181	0.448827	OK	-0.455332	0.179988	OK	SEC61A2	0.526813	0.37031	1.42263	0.154844	0.406879	OK	0.108685	0.380894	0.285341	0.775383	0.937243	OK
ENSG00000065717.15	26	29	22	17	20	20	9	4	20	8	9	14	19	15	22	16	15	19	-0.158862	0.735364	OK	-0.625968	0.409384	OK	-0.0509253	0.930859	OK	TLE2	-1.09513	0.602423	-1.81788	0.0690829	0.245787	OK	0.413235	0.564862	0.731568	0.464432	0.789874	OK
ENSG00000065802.12	1063	1118	1210	1331	869	977	902	635	1081	1203	628	1030	1028	918	1213	1045	869	997	0.771523	6.86823e-08	OK	0.609742	0.000525841	OK	0.631075	3.32648e-05	OK	ASB1	-0.0748719	0.136662	-0.547864	0.583785	0.805961	OK	-0.180154	0.15097	-1.19331	0.232747	0.593394	OK
ENSG00000065809.13	616	611	669	660	430	557	402	365	694	611	367	622	711	731	1103	620	638	725	0.0745401	0.627446	OK	0.145189	0.494507	OK	0.0175559	0.915857	OK	FAM107B	0.0548752	0.183298	0.299378	0.764652	0.902603	OK	0.448141	0.179398	2.49802	0.0124888	0.1063	OK
ENSG00000065833.9	410	315	244	569	205	197	427	253	358	516	184	241	352	192	234	329	165	151	0.155827	0.556593	OK	-0.26175	0.240336	OK	-0.060155	0.827501	OK	ME1	-0.0333773	0.273654	-0.121969	0.902924	0.965729	OK	-0.482927	0.293384	-1.64606	0.0997514	0.390544	OK
ENSG00000065882.16	621	683	602	731	471	464	678	459	674	864	472	617	632	542	692	594	518	532	0.153005	0.284414	OK	0.0539842	0.67801	OK	-0.020707	0.880933	OK	TBC1D1	0.152187	0.130684	1.16454	0.244204	0.517984	OK	-0.134889	0.132571	-1.01749	0.308922	0.671348	OK
ENSG00000065883.16	821	959	909	884	604	654	831	621	860	765	445	653	932	834	1029	735	626	763	-0.213051	0.0627768	OK	-0.150009	0.215488	OK	-0.0640404	0.604312	OK	CDK13	0.0276165	0.128739	0.214516	0.830145	0.93324	OK	0.187219	0.132353	1.41454	0.157203	0.500029	OK
ENSG00000065911.12	519	702	967	827	526	654	811	799	1465	1066	617	995	762	1249	1673	784	738	870	0.240957	0.224385	OK	-0.136869	0.375803	OK	-0.344231	0.128037	OK	MTHFD2	0.363347	0.147313	2.46651	0.0136438	0.0821126	OK	0.231897	0.165167	1.40402	0.160314	0.504172	OK
ENSG00000065923.10	946	1111	1100	892	548	660	933	682	1142	1027	519	781	1050	1028	1351	765	539	627	-0.00320153	0.980182	OK	-0.0787229	0.498179	OK	-0.56759	1.34954e-05	OK	SLC9A7	0.0886483	0.137004	0.647051	0.517599	0.762728	OK	-0.365962	0.156932	-2.33197	0.0197023	0.145007	OK
ENSG00000065970.9	397	498	470	540	344	346	393	310	445	587	300	391	423	416	498	406	356	399	0.0777594	0.564716	OK	0.0615204	0.674827	OK	0.066704	0.63593	OK	FOXJ2	0.00561363	0.1481	0.0379044	0.969764	0.98883	OK	-0.015212	0.143347	-0.10612	0.915487	0.977454	OK
ENSG00000065978.19	6938	7073	6366	7770	4687	5030	5910	4282	6619	7999	4427	6557	6750	5992	7798	6439	6167	6647	-0.000749786	0.99281	OK	0.0283952	0.711024	OK	0.117076	0.215994	OK	YBX1	0.0425547	0.0875501	0.486061	0.626924	0.831477	OK	0.156244	0.103559	1.50875	0.131362	0.455008	OK
ENSG00000065989.16	50	51	52	26	9	17	59	32	39	17	10	7	44	43	23	22	9	21	-1.49795	0.000393064	OK	-2.10866	1.61301e-05	OK	-0.984036	0.0618567	OK	PDE4A	-0.685002	0.62858	-1.08976	0.275819	0.554011	OK	-0.0277984	0.58741	-0.0473236	0.962255	0.991062	OK
ENSG00000066027.12	212	226	192	248	152	171	167	115	174	238	111	183	204	166	212	250	178	189	0.0850657	0.619243	OK	0.109481	0.57092	OK	0.258063	0.155936	OK	PPP2R5A	-0.149301	0.187871	-0.794699	0.426789	0.694448	OK	0.107037	0.184611	0.579796	0.562052	0.848142	OK
ENSG00000066044.15	1009	1134	1028	916	594	653	798	593	950	956	495	723	918	845	1226	766	667	738	-0.297227	0.00442017	OK	-0.184437	0.126281	OK	-0.080609	0.536516	OK	ELAVL1	-0.111096	0.119169	-0.932255	0.351205	0.630721	OK	0.127527	0.12065	1.057	0.290513	0.651505	OK
ENSG00000066084.13	670	785	738	942	568	563	765	459	782	992	435	678	694	619	797	715	528	514	0.158844	0.174817	OK	-0.0213167	0.880844	OK	-0.00882118	0.94468	OK	DIP2B	-0.0407915	0.142103	-0.287055	0.77407	0.906918	OK	-0.184679	0.136308	-1.35487	0.17546	0.524485	OK
ENSG00000066117.15	743	863	703	771	464	441	713	451	701	796	379	518	736	720	843	602	477	487	-0.216086	0.139669	OK	-0.280989	0.079849	OK	-0.370374	0.00271449	OK	SMARCD1	-0.0690465	0.169767	-0.406713	0.684219	0.860306	OK	-0.0430182	0.146611	-0.293417	0.769204	0.935231	OK
ENSG00000066135.13	487	549	485	632	394	361	504	387	603	616	364	478	483	475	687	408	367	349	0.038202	0.754101	OK	-0.116191	0.425487	OK	-0.26226	0.0594826	OK	KDM4A	0.0388448	0.145513	0.26695	0.789508	0.914986	OK	-0.234354	0.142465	-1.645	0.0999703	0.390934	OK
ENSG00000066136.20	359	386	369	455	339	264	341	211	321	471	319	336	368	354	441	415	347	326	0.161651	0.328564	OK	0.31445	0.0618838	OK	0.20621	0.165357	OK	NFYC	0.0233199	0.175867	0.132599	0.89451	0.962677	OK	0.0541314	0.176376	0.306909	0.758913	0.931104	OK
ENSG00000066230.12	63	68	60	59	44	30	38	45	55	41	24	42	38	51	46	37	39	30	-0.285802	0.370576	OK	-0.510451	0.173684	OK	-0.167914	0.651107	OK	SLC9A3	-0.378911	0.371581	-1.01973	0.307858	0.587165	OK	-0.343126	0.372194	-0.921899	0.356581	0.712197	OK
ENSG00000066279.18	197	201	186	195	83	94	284	152	263	323	134	165	77	87	164	62	65	86	-0.404308	0.0701652	OK	-0.379366	0.109101	OK	-0.265343	0.387893	OK	ASPM	0.699796	0.255731	2.73645	0.00621051	0.0463191	OK	-0.647734	0.28236	-2.294	0.0217907	0.155658	OK
ENSG00000066322.15	915	907	771	1006	548	580	990	720	1054	1120	726	935	1005	770	1008	875	755	749	0.00787903	0.94914	OK	-0.0702054	0.528785	OK	-0.0003418	0.99779	OK	ELOVL1	0.29627	0.128408	2.30724	0.0210412	0.111716	OK	0.118985	0.128375	0.926856	0.354001	0.710703	OK
ENSG00000066379.15	58	57	53	45	39	42	61	32	55	67	53	56	43	60	66	51	72	55	-0.103052	0.756612	OK	0.177081	0.593186	OK	0.283091	0.399752	OK	ZNRD1	0.347302	0.33275	1.04373	0.29661	0.576063	OK	0.438071	0.353593	1.23891	0.215378	0.571779	OK
ENSG00000066422.5	226	242	240	272	183	179	211	152	266	229	142	182	226	180	272	173	173	153	0.105732	0.511864	OK	-0.246338	0.166415	OK	-0.166713	0.372047	OK	ZBTB11	-0.22024	0.17725	-1.24254	0.214038	0.482971	OK	-0.282902	0.18552	-1.52491	0.127281	0.447412	OK
ENSG00000066427.24	160	185	139	196	127	136	104	113	143	172	85	157	149	106	149	178	128	160	0.378302	0.0835918	OK	0.705098	0.0178637	OK	0.654313	0.00352812	OK	ATXN3	0.0353811	0.212807	0.166259	0.867953	0.950021	OK	0.171965	0.209514	0.820778	0.411773	0.751848	OK
ENSG00000066455.13	692	777	752	602	440	466	581	444	763	636	413	644	802	672	913	633	546	634	-0.273329	0.0228999	OK	-0.0951651	0.513562	OK	-0.161444	0.173321	OK	GOLGA5	0.142063	0.148087	0.959316	0.3374	0.617643	OK	0.269326	0.135633	1.98569	0.0470675	0.253998	OK
ENSG00000066557.6	171	178	135	135	122	97	153	144	208	160	88	123	159	122	195	108	84	87	-0.17515	0.444322	OK	-0.525103	0.00998672	OK	-0.522016	0.0175191	OK	LRRC40	0.025971	0.22969	0.11307	0.909975	0.967612	OK	-0.307759	0.243566	-1.26356	0.206389	0.563613	OK
ENSG00000066583.12	88	109	81	83	48	65	69	44	69	57	31	47	83	76	71	43	37	39	-0.230905	0.392397	OK	-0.491781	0.117613	OK	-0.728756	0.0198399	OK	ISOC1	-0.554812	0.312596	-1.77485	0.0759225	0.261663	OK	-0.702926	0.319948	-2.197	0.0280205	0.183697	OK
ENSG00000066629.17	358	314	308	344	229	186	276	174	307	337	177	277	371	349	427	284	244	237	-0.155908	0.322163	OK	-0.0582248	0.737888	OK	-0.393819	0.0343496	OK	EML1	-0.237716	0.170999	-1.39016	0.16448	0.41939	OK	-0.0291011	0.197321	-0.147481	0.882752	0.970557	OK
ENSG00000066651.20	109	118	120	114	93	85	71	56	98	94	51	69	86	77	120	68	89	64	0.00946161	0.968521	OK	-0.0553384	0.849962	OK	-0.28781	0.318666	OK	TRMT11	-0.37934	0.28737	-1.32004	0.186821	0.448307	OK	-0.371482	0.289	-1.2854	0.198651	0.553324	OK
ENSG00000066654.14	436	515	471	551	334	314	447	320	497	559	262	376	452	425	489	405	338	359	-0.087068	0.504968	OK	-0.10363	0.553001	OK	-0.00286042	0.984811	OK	THUMPD1	0.0665877	0.177552	0.375033	0.707636	0.872571	OK	0.07156	0.143183	0.499779	0.617231	0.87872	OK
ENSG00000066697.14	662	665	650	1869	1533	1518	587	403	609	1059	683	1084	613	507	737	941	1035	1091	1.62445	3.27307e-39	OK	0.802745	1.67253e-11	OK	1.06193	2.13448e-13	OK	MSANTD3	-0.893697	0.130966	-6.82387	8.86207e-12	6.51635e-10	OK	-0.638259	0.152518	-4.1848	2.85418e-05	0.000862043	OK
ENSG00000066739.12	608	630	556	611	376	374	427	337	521	448	226	308	612	494	618	395	278	329	-0.0307141	0.86162	OK	-0.438898	0.018048	OK	-0.188048	0.247195	OK	ATG2B	-0.264428	0.188825	-1.40038	0.161398	0.414963	OK	-0.0590182	0.174366	-0.338474	0.735006	0.921402	OK
ENSG00000066777.9	648	746	669	888	575	570	687	445	740	788	417	623	745	648	829	661	544	550	0.281267	0.0154945	OK	-0.0942811	0.505356	OK	-0.150283	0.268734	OK	ARFGEF1	-0.296255	0.131888	-2.24626	0.0246875	0.12388	OK	-0.224394	0.132003	-1.69991	0.0891479	0.366662	OK
ENSG00000066827.16	87	76	83	93	85	69	87	56	76	131	51	104	82	71	113	113	74	86	0.269562	0.335406	OK	0.27101	0.413517	OK	0.430393	0.220695	OK	ZFAT	0.103086	0.323271	0.318883	0.749815	0.897303	OK	0.287231	0.350955	0.818426	0.413114	0.752764	OK
ENSG00000066855.16	161	154	178	193	113	123	178	93	164	232	91	147	178	123	158	198	137	129	0.22974	0.326803	OK	-0.17783	0.432737	OK	0.181213	0.43384	OK	MTFR1	-0.134953	0.225917	-0.597357	0.550269	0.784599	OK	-0.0398372	0.231387	-0.172167	0.863306	0.964689	OK
ENSG00000066926.11	462	428	401	375	186	177	344	300	392	347	179	214	431	306	383	254	201	207	-0.491048	0.00769054	OK	-0.717015	0.000727738	OK	-0.231489	0.190404	OK	FECH	0.0164195	0.231862	0.0708156	0.943545	0.9781	OK	0.104927	0.198247	0.529274	0.596615	0.869324	OK
ENSG00000066933.16	400	443	481	583	413	422	342	268	356	507	305	464	418	452	546	492	392	405	0.442959	0.0175106	OK	0.404198	0.0119655	OK	0.0897369	0.636504	OK	MYO9A	-0.163455	0.171247	-0.954501	0.33983	0.620063	OK	-0.163638	0.177511	-0.92185	0.356607	0.712197	OK
ENSG00000067057.17	2154	2892	2828	2344	1921	2190	3085	2593	3778	3662	2452	3427	2882	3158	3799	2672	2715	3112	0.0237555	0.868772	OK	-0.0689834	0.519764	OK	0.0275688	0.826649	OK	PFKP	0.447541	0.135779	3.2961	0.000980383	0.0110569	OK	0.349177	0.148858	2.34571	0.0189911	0.141763	OK
ENSG00000067064.11	1399	523	634	4589	1755	2118	1022	377	615	3225	1475	2103	1685	637	812	4469	2641	2920	1.88905	0.000202356	OK	1.6847	8.9939e-07	OK	1.94695	5.0953e-06	OK	IDI1	-0.267382	0.1788	-1.49543	0.134803	0.375429	OK	0.384585	0.190739	2.01629	0.0437695	0.243313	OK
ENSG00000067066.17	860	872	797	1256	834	837	720	486	768	1064	688	882	701	648	788	795	790	791	0.453514	5.3258e-05	OK	0.351989	0.00262187	OK	0.499777	0.00158652	OK	SP100	0.00243368	0.124253	0.0195865	0.984373	0.994124	OK	-0.079856	0.156146	-0.511417	0.609059	0.875238	OK
ENSG00000067082.15	1572	1387	1569	19999	17156	19276	1233	787	1193	8432	5230	8547	1573	1256	1788	6239	5915	8744	4.15691	3.12951e-196	OK	3.02506	3.74111e-140	OK	2.67289	1.13778e-59	OK	KLF6	-1.3639	0.148676	-9.1736	4.57496e-20	6.61711e-18	OK	-1.40934	0.18788	-7.50127	6.32006e-14	8.62951e-12	OK
ENSG00000067113.17	268	234	219	285	204	186	197	118	212	293	155	209	319	267	349	340	230	259	0.169383	0.316552	OK	0.248908	0.180559	OK	0.0557023	0.730525	OK	PLPP1	-0.0920877	0.171323	-0.537511	0.590915	0.811259	OK	0.27107	0.172666	1.56992	0.116435	0.426755	OK
ENSG00000067141.17	211	307	244	243	157	152	183	111	204	196	102	188	234	224	242	176	121	146	-0.237621	0.192465	OK	0.0187725	0.951573	OK	-0.244446	0.270644	OK	NEO1	-0.0503863	0.277796	-0.181379	0.85607	0.944763	OK	-0.363638	0.24309	-1.4959	0.134679	0.461295	OK
ENSG00000067167.8	2173	2239	2539	2209	1299	1484	2075	1509	2586	2482	1415	1930	2529	2192	2863	2365	1667	1774	-0.262801	0.0229213	OK	-0.18484	0.063348	OK	-0.271017	0.012417	OK	TRAM1	0.240874	0.1232	1.95515	0.0505654	0.201953	OK	0.284701	0.136414	2.08704	0.036885	0.21711	OK
ENSG00000067177.15	175	194	171	153	110	102	126	75	97	108	50	89	152	118	187	149	97	96	-0.352341	0.0758684	OK	-0.277435	0.293267	OK	-0.141406	0.552933	OK	PHKA1	-0.559203	0.245346	-2.27924	0.0226529	0.117709	OK	-0.120442	0.240578	-0.500633	0.616629	0.878603	OK
ENSG00000067182.7	2039	2435	2291	2164	1552	1604	1666	1301	1984	2251	1376	2080	2381	2057	2525	2389	1878	2270	-0.0179531	0.850679	OK	0.105299	0.296604	OK	0.1733	0.0877423	OK	TNFRSF1A	0.0600559	0.11116	0.540264	0.589015	0.809335	OK	0.320478	0.116369	2.75397	0.00588768	0.0625095	OK
ENSG00000067191.16	166	136	154	216	125	131	170	116	206	319	148	206	162	129	183	282	198	184	0.105978	0.61774	OK	0.221939	0.342254	OK	0.798503	0.00141262	OK	CACNB1	0.334914	0.213815	1.56637	0.117261	0.344738	OK	0.556886	0.252486	2.20561	0.0274112	0.181376	OK
ENSG00000067208.14	596	563	548	613	346	342	515	392	659	625	242	435	523	468	610	412	258	283	0.0998176	0.567256	OK	-0.0658852	0.751116	OK	-0.341549	0.0377888	OK	EVI5	-0.106202	0.227926	-0.465951	0.641251	0.839481	OK	-0.439306	0.193214	-2.27367	0.0229858	0.161122	OK
ENSG00000067221.14	157	125	107	156	83	99	149	92	137	190	83	158	145	130	140	151	113	106	0.0319694	0.901826	OK	-0.000348073	0.99875	OK	-0.0150688	0.94571	OK	STOML1	0.182364	0.225735	0.807866	0.419168	0.689326	OK	0.257769	0.23506	1.09661	0.272812	0.633935	OK
ENSG00000067225.18	34601	43360	42261	35972	27461	30198	27704	22125	33586	32851	20064	29909	37467	35304	46142	33246	29494	32973	-0.0730107	0.520242	OK	-0.0871976	0.329908	OK	-0.0812505	0.364076	OK	PKM	-0.272852	0.110692	-2.46497	0.0137023	0.0823891	OK	0.0059015	0.114893	0.0513654	0.959034	0.990155	OK
ENSG00000067248.10	455	535	429	459	289	249	497	328	484	571	284	389	472	368	527	334	274	318	-0.262476	0.0843713	OK	-0.183285	0.216594	OK	-0.324532	0.0244666	OK	DHX29	0.311261	0.159447	1.95212	0.0509237	0.202617	OK	-0.0639161	0.165371	-0.386501	0.699126	0.909322	OK
ENSG00000067334.14	564	554	474	520	344	295	527	361	521	580	309	425	499	418	520	398	310	347	-0.00425236	0.980617	OK	-0.093167	0.515852	OK	-0.373342	0.0188001	OK	DNTTIP2	0.102443	0.176345	0.580922	0.561293	0.791233	OK	-0.261839	0.194218	-1.34817	0.177603	0.527417	OK
ENSG00000067365.14	142	165	119	177	88	94	122	87	150	153	98	135	143	113	133	110	95	116	-0.390523	0.0943461	OK	0.158091	0.482478	OK	-0.0581605	0.801797	OK	METTL22	0.23136	0.241777	0.956915	0.33861	0.61874	OK	-0.0297589	0.260088	-0.114419	0.908906	0.976712	OK
ENSG00000067369.13	1321	1430	1269	1320	845	828	1193	716	1241	1455	783	1055	1281	1148	1384	1071	892	872	-0.0422971	0.710613	OK	0.176808	0.139962	OK	-0.170395	0.131917	OK	TP53BP1	0.187777	0.124411	1.50932	0.131216	0.368874	OK	-0.144593	0.128793	-1.12267	0.261576	0.623076	OK
ENSG00000067445.21	384	460	392	430	282	290	431	271	435	482	282	333	468	447	495	412	378	342	0.141801	0.314062	OK	0.121125	0.450839	OK	-0.0426516	0.775832	OK	TRO	0.177378	0.151025	1.17449	0.240199	0.513856	OK	0.0974249	0.154072	0.632332	0.52717	0.827776	OK
ENSG00000067533.6	199	195	200	154	116	91	117	125	157	128	68	104	184	154	216	137	101	98	-0.619113	0.0150076	OK	-0.255015	0.440311	OK	-0.377948	0.109295	OK	RRP15	0.459345	0.359053	1.27932	0.200783	0.466498	OK	0.685612	0.293431	2.33654	0.0194634	0.143572	OK
ENSG00000067560.12	5736	6622	6441	5780	4128	4673	4076	3674	6227	5285	3654	5343	6822	6562	8524	5991	5650	6396	-0.107307	0.27148	OK	-0.0164181	0.90089	OK	-0.0547933	0.610773	OK	RHOA	-0.0686181	0.119144	-0.575928	0.564664	0.793265	OK	0.314634	0.118884	2.64657	0.00813119	0.0790949	OK
ENSG00000067596.12	525	556	597	441	256	238	455	329	474	405	230	333	536	476	616	360	238	302	-0.662035	3.88848e-07	OK	-0.514801	0.000416093	OK	-0.617933	5.3526e-05	OK	DHX8	-0.152396	0.153818	-0.990755	0.321805	0.602761	OK	0.0281617	0.167755	0.167874	0.866682	0.965731	OK
ENSG00000067704.10	954	1067	970	866	517	523	896	622	1011	953	468	623	887	792	1095	663	495	507	-0.387768	0.000472534	OK	-0.395749	0.0015327	OK	-0.469456	0.000720352	OK	IARS2	0.0493753	0.136992	0.360425	0.71853	0.87893	OK	-0.119557	0.149822	-0.797992	0.424875	0.762181	OK
ENSG00000067715.14	611	629	590	1138	810	711	407	343	522	774	417	593	504	450	591	747	600	584	0.802831	2.28647e-11	OK	0.450452	0.000457511	OK	0.456366	0.00088767	OK	SYT1	-0.543187	0.126869	-4.28147	1.85665e-05	0.000381236	OK	-0.403536	0.126906	-3.17981	0.00147372	0.0219518	OK
ENSG00000067798.16	422	439	461	517	380	389	327	245	446	441	198	377	614	525	809	499	465	403	0.569404	0.0120173	OK	-0.0679306	0.755929	OK	-0.129811	0.520899	OK	NAV3	-0.858297	0.247956	-3.4615	0.000537181	0.00681154	OK	-0.33413	0.225306	-1.483	0.138074	0.467909	OK
ENSG00000067829.19	379	407	366	379	270	282	328	215	362	399	218	331	334	323	384	337	276	328	-0.0603434	0.665586	OK	-0.0488109	0.740862	OK	0.0362517	0.813448	OK	IDH3G	-0.0793455	0.150798	-0.526173	0.598768	0.816006	OK	-0.0313041	0.159977	-0.195679	0.844861	0.958465	OK
ENSG00000067836.12	428	423	400	400	220	265	418	294	363	474	252	382	461	375	356	410	285	275	-0.23345	0.140877	OK	0.0700702	0.684425	OK	-0.147009	0.475527	OK	ROGDI	0.444904	0.188998	2.35402	0.0185717	0.102234	OK	0.136972	0.207766	0.65926	0.509729	0.81788	OK
ENSG00000067900.8	994	1077	1030	1132	803	799	926	635	1041	1139	647	920	1048	849	1116	993	875	851	0.0671556	0.508304	OK	-0.072933	0.508915	OK	0.167329	0.179811	OK	ROCK1	-0.0977823	0.111203	-0.879318	0.379229	0.656027	OK	0.0916452	0.121583	0.75377	0.450987	0.780389	OK
ENSG00000067955.15	1588	1414	1504	1093	602	677	2068	1311	1967	1320	537	884	2202	1508	1866	1298	776	1012	-0.67745	1.41256e-05	OK	-1.05539	1.7797e-09	OK	-0.529476	0.000989566	OK	CBFB	0.112299	0.200497	0.5601	0.575411	0.800211	OK	0.417155	0.190548	2.18924	0.0285796	0.186189	OK
ENSG00000067992.15	5	25	9	10	7	9	2	6	20	7	13	20	13	18	30	7	17	17	0.0753482	0.922719	OK	0.0746493	0.935282	OK	1.10114	0.413858	OK	PDK3	0.631853	0.855698	0.738406	0.460268	0.720408	OK	2.05065	1.45026	1.41399	0.157365	0.500422	OK
ENSG00000068001.14	605	582	441	528	330	359	579	377	580	730	366	430	485	404	473	495	272	296	-0.141667	0.355253	OK	-0.0584251	0.660608	OK	-0.142688	0.503553	OK	HYAL2	0.274292	0.137848	1.98981	0.0466119	0.190885	OK	-0.268517	0.21227	-1.26498	0.20588	0.56281	OK
ENSG00000068024.16	156	180	164	211	133	135	117	93	119	164	86	119	143	129	181	189	118	151	0.389192	0.215924	OK	0.774524	0.0365846	OK	0.543565	0.0203208	OK	HDAC4	-0.114513	0.641744	-0.17844	0.858377	0.94552	OK	-0.265421	0.311174	-0.852967	0.393678	0.739223	OK
ENSG00000068028.17	137	140	145	183	145	136	170	119	146	228	141	137	146	136	174	114	185	139	0.411802	0.0372831	OK	0.114495	0.61195	OK	0.169784	0.49317	OK	RASSF1	0.0360506	0.217488	0.165759	0.868347	0.950045	OK	-0.108947	0.251599	-0.433018	0.665002	0.896793	OK
ENSG00000068079.7	122	86	93	95	69	65	59	65	69	91	40	58	80	53	69	80	52	62	-0.0597717	0.823291	OK	-0.347272	0.324253	OK	0.482086	0.149785	OK	IFI35	-0.114959	0.315067	-0.364871	0.715208	0.877231	OK	-0.0376014	0.322396	-0.116631	0.907152	0.97663	OK
ENSG00000068097.14	289	323	266	187	123	102	241	174	243	222	122	181	317	245	326	136	142	112	-0.794272	7.12698e-05	OK	-0.31742	0.115795	OK	-0.992994	2.70603e-06	OK	HEATR6	0.394274	0.226572	1.74017	0.0818284	0.274892	OK	-0.120669	0.263831	-0.457371	0.647404	0.89253	OK
ENSG00000068120.15	445	485	391	448	337	345	386	265	405	536	302	372	362	351	406	339	322	336	-0.0959822	0.465024	OK	0.0328686	0.816335	OK	-0.0211369	0.891775	OK	COASY	-0.0159566	0.142965	-0.111612	0.911131	0.968159	OK	-0.159298	0.148171	-1.07509	0.282333	0.643958	OK
ENSG00000068137.15	233	278	259	309	205	240	259	152	220	305	200	301	257	231	282	375	292	345	0.199249	0.260427	OK	0.177267	0.332305	OK	0.542801	0.000364597	OK	PLEKHH3	-0.0955831	0.168728	-0.566494	0.571058	0.796929	OK	0.32731	0.156556	2.09069	0.036556	0.215846	OK
ENSG00000068305.17	2119	2425	2735	2869	1865	2090	1527	1418	2313	2223	1238	2095	2862	2422	3377	3166	2456	2970	0.0889032	0.38171	OK	-0.0741914	0.561727	OK	0.228751	0.0142307	OK	MEF2A	-0.356668	0.111203	-3.20737	0.00133953	0.0141273	OK	0.45427	0.10135	4.48217	7.38886e-06	0.000261765	OK
ENSG00000068308.13	785	983	860	1098	783	779	699	505	814	1033	634	957	847	799	1018	1029	911	906	0.229843	0.0438532	OK	0.26315	0.0319045	OK	0.293711	0.00849634	OK	OTUD5	-0.0350402	0.121004	-0.289579	0.772138	0.906267	OK	0.0795708	0.115098	0.691329	0.489359	0.805364	OK
ENSG00000068323.17	1336	1410	1278	2110	1432	1507	1230	805	1158	1820	971	1367	1222	1110	1385	1460	1269	1402	0.611883	2.34929e-11	OK	0.33127	0.00194725	OK	0.403949	5.63406e-05	OK	TFE3	-0.349428	0.10232	-3.41506	0.000637689	0.00785067	OK	-0.296627	0.106712	-2.77969	0.0054411	0.0588465	OK
ENSG00000068354.16	238	243	221	310	211	229	221	169	229	292	175	265	242	201	245	241	172	209	0.420199	0.00920154	OK	0.250019	0.212032	OK	0.113559	0.521105	OK	TBC1D25	-0.182564	0.179851	-1.01508	0.310067	0.589414	OK	-0.298109	0.181211	-1.6451	0.0999494	0.390934	OK
ENSG00000068366.20	1482	1255	1257	1731	879	841	1371	930	1413	1312	539	894	1454	1144	1449	1222	688	789	-0.0111811	0.94021	OK	-0.530991	0.000128327	OK	-0.364614	0.0137555	OK	ACSL4	-0.306464	0.166911	-1.8361	0.0663429	0.239756	OK	-0.257193	0.174176	-1.47663	0.139776	0.471111	OK
ENSG00000068383.19	430	470	448	373	278	288	403	316	506	403	255	397	586	479	558	389	301	346	-0.21242	0.135921	OK	-0.345541	0.0233834	OK	-0.430263	0.00290597	OK	INPP5A	0.119351	0.167964	0.710575	0.477348	0.733036	OK	0.155324	0.156718	0.991106	0.321634	0.683505	OK
ENSG00000068394.11	132	176	135	134	84	89	96	74	135	132	75	92	141	94	161	123	77	108	-0.273628	0.208324	OK	-0.113796	0.640762	OK	-0.13983	0.577834	OK	GPKOW	-0.113624	0.234749	-0.484026	0.628368	0.831882	OK	-0.01355	0.248476	-0.0545324	0.956511	0.989303	OK
ENSG00000068400.13	398	434	338	388	206	283	360	256	367	365	175	277	358	289	404	276	234	250	-0.194584	0.225793	OK	-0.492411	0.00317752	OK	-0.363533	0.0177708	OK	GRIPAP1	-0.195028	0.176657	-1.10399	0.269597	0.546482	OK	-0.235201	0.177754	-1.32318	0.185775	0.536915	OK
ENSG00000068438.15	519	545	529	425	304	307	447	308	494	419	281	407	666	563	648	477	449	445	-0.332969	0.0102631	OK	-0.208753	0.137366	OK	-0.211136	0.127529	OK	FTSJ1	0.0258843	0.150205	0.172326	0.863181	0.947792	OK	0.428911	0.14282	3.00316	0.00267193	0.0343193	OK
ENSG00000068489.12	166	169	161	260	141	140	293	124	237	396	167	212	79	76	137	98	111	125	0.321015	0.0951872	OK	0.182403	0.439185	OK	0.468256	0.085839	OK	PRR11	0.479683	0.218064	2.19973	0.0278258	0.135134	OK	-0.624189	0.230299	-2.71034	0.00672151	0.0687251	OK
ENSG00000068650.18	219	285	308	286	181	205	205	137	255	206	126	207	257	283	356	206	189	204	0.107607	0.596844	OK	0.0885588	0.767435	OK	-0.549801	0.0086411	OK	ATP11A	-0.216468	0.293105	-0.738533	0.46019	0.720388	OK	-0.223677	0.209395	-1.06821	0.285428	0.646454	OK
ENSG00000068654.16	659	691	689	544	287	346	698	409	701	692	296	408	672	543	665	400	358	323	-0.696289	6.31004e-08	OK	-0.649007	4.40861e-05	OK	-0.65208	3.64303e-05	OK	POLR1A	0.0899645	0.166185	0.541351	0.588266	0.809193	OK	-0.00510194	0.173013	-0.0294888	0.976475	0.994822	OK
ENSG00000068697.7	2283	2486	2301	2424	1524	1683	2490	1682	2701	3222	1723	2378	2869	2351	2958	2617	2192	2115	-0.0692325	0.425171	OK	0.0561081	0.53975	OK	0.0294226	0.764778	OK	LAPTM4A	0.363948	0.0998625	3.64449	0.000267921	0.00384422	OK	0.349416	0.104738	3.3361	0.000849624	0.0141152	OK
ENSG00000068724.17	391	437	429	332	250	241	344	245	388	426	230	310	410	382	491	276	264	319	-0.202406	0.149354	OK	-0.101995	0.528724	OK	-0.271785	0.191243	OK	TTC7A	-0.0462589	0.154486	-0.299437	0.764607	0.902603	OK	0.0156803	0.219249	0.0715182	0.942985	0.98601	OK
ENSG00000068745.15	494	501	493	711	462	407	550	415	517	698	451	535	405	327	467	454	522	426	0.216458	0.113013	OK	-0.00621603	0.967435	OK	0.429567	0.00838627	OK	IP6K2	0.00461416	0.142454	0.0323905	0.974161	0.990414	OK	-0.241055	0.162691	-1.48167	0.138429	0.468269	OK
ENSG00000068784.13	145	147	135	117	60	87	112	70	128	130	83	104	165	121	173	80	88	96	-0.253718	0.363585	OK	0.0887723	0.725762	OK	-0.421162	0.104914	OK	SRBD1	0.161312	0.307621	0.524384	0.600011	0.816722	OK	-0.0174541	0.337702	-0.051685	0.95878	0.990062	OK
ENSG00000068796.16	338	394	380	287	200	203	340	232	344	383	197	292	320	252	390	270	218	235	-0.419434	0.0051345	OK	-0.192341	0.227501	OK	-0.261056	0.149825	OK	KIF2A	0.239505	0.166157	1.44144	0.149461	0.397949	OK	0.000146916	0.179404	0.000818913	0.999347	0.999881	OK
ENSG00000068878.15	1421	1451	1289	1908	1167	1110	1621	1131	1590	1783	862	1317	1560	1211	1495	1381	1125	1024	0.227734	0.0378305	OK	-0.275108	0.0306147	OK	-0.0316724	0.823245	OK	PSME4	-0.0722461	0.106376	-0.67916	0.497037	0.748679	OK	-0.170252	0.146667	-1.16081	0.245719	0.607479	OK
ENSG00000068885.15	591	645	570	676	477	441	247	200	344	322	212	308	573	438	580	501	408	392	0.0372186	0.79488	OK	0.550273	0.0010372	OK	-0.0526207	0.733298	OK	IFT80	-0.394663	0.151301	-2.60847	0.00909493	0.0607961	OK	-0.234445	0.160321	-1.46234	0.143647	0.478021	OK
ENSG00000068903.20	463	520	469	437	328	327	336	255	383	378	256	394	441	379	482	341	330	341	-0.114302	0.420015	OK	0.109184	0.506954	OK	-0.0629455	0.659772	OK	SIRT2	-0.108436	0.174897	-0.62	0.535258	0.774488	OK	-0.0625964	0.163245	-0.38345	0.701386	0.909914	OK
ENSG00000068912.14	905	995	963	795	528	612	1013	838	1345	1204	689	971	1185	1119	1463	918	797	852	-0.289094	0.00977982	OK	-0.22392	0.0427711	OK	-0.32201	0.0029557	OK	ERLEC1	0.521495	0.118467	4.40203	1.07242e-05	0.000237231	OK	0.414563	0.124896	3.31927	0.000902527	0.0147511	OK
ENSG00000068971.14	251	237	236	318	258	273	281	216	323	392	290	406	269	262	266	308	318	306	0.225939	0.287404	OK	0.227637	0.151613	OK	0.601835	0.00016143	OK	PPP2R5B	0.357056	0.166926	2.13901	0.0324352	0.150437	OK	0.303273	0.166718	1.81908	0.0688997	0.316003	OK
ENSG00000069020.18	350	482	431	1239	937	945	211	184	303	1005	618	858	343	345	420	714	845	713	1.44719	1.59631e-21	OK	2.10678	1.07478e-35	OK	1.08128	1.35898e-07	OK	MAST4	-0.304829	0.14874	-2.0494	0.0404229	0.174374	OK	-0.501233	0.188948	-2.65275	0.00798384	0.0781569	OK
ENSG00000069248.12	403	510	414	402	253	224	356	257	430	403	235	344	400	334	451	263	248	233	-0.182828	0.292905	OK	0.206321	0.331288	OK	-0.385302	0.172144	OK	NUP133	0.414637	0.230218	1.80106	0.0716929	0.252103	OK	0.0501504	0.280835	0.178576	0.858271	0.962791	OK
ENSG00000069275.13	3342	3269	3341	2768	1633	1772	2813	2107	3456	3179	1572	2334	3215	2508	3791	2154	1670	1803	-0.402886	0.00308634	OK	-0.228272	0.0667413	OK	-0.278954	0.0420232	OK	NUCKS1	0.250539	0.134188	1.86707	0.0618918	0.229664	OK	0.0765595	0.11739	0.652183	0.514283	0.820499	OK
ENSG00000069329.18	1371	1487	1246	1276	742	704	1034	785	1262	1183	663	911	1339	1030	1378	1022	709	786	-0.241044	0.0439651	OK	-0.255976	0.0144449	OK	-0.394585	0.00458411	OK	VPS35	-0.0429728	0.126015	-0.341015	0.733092	0.887591	OK	-0.149538	0.138746	-1.07778	0.281132	0.64285	OK
ENSG00000069345.12	626	654	643	708	462	431	478	323	515	547	360	460	657	563	725	605	572	577	0.0118403	0.921782	OK	0.0983683	0.485043	OK	0.100127	0.416678	OK	DNAJA2	-0.176193	0.140573	-1.25339	0.210065	0.477856	OK	0.176341	0.132471	1.33117	0.183133	0.532626	OK
ENSG00000069399.15	263	383	402	465	499	483	204	248	308	315	222	368	292	307	465	389	345	434	0.802161	0.000161403	OK	0.0714293	0.771771	OK	0.180284	0.279324	OK	BCL3	-0.911362	0.232253	-3.92401	8.70865e-05	0.00149055	OK	-0.581742	0.214042	-2.71789	0.00656992	0.067491	OK
ENSG00000069424.15	82	89	62	95	72	63	50	27	51	49	31	39	49	41	57	51	49	41	0.347226	0.207516	OK	-0.380458	0.39321	OK	0.320891	0.426559	OK	KCNAB2	-1.35077	0.319569	-4.22685	2.36981e-05	0.000471169	OK	-0.776256	0.351443	-2.20877	0.0271909	0.180465	OK
ENSG00000069493.15	48	57	45	120	167	126	20	18	27	39	29	29	54	28	41	52	40	41	1.74456	0.0176732	OK	0.882484	0.111851	OK	0.086187	0.826204	OK	CLEC2D	-2.17055	0.441153	-4.92018	8.64634e-07	2.58643e-05	OK	-2.31818	0.378536	-6.12406	9.12207e-10	7.61606e-08	OK
ENSG00000069509.6	102	86	100	75	61	46	58	44	64	50	34	54	86	64	87	77	47	71	-0.406234	0.139305	OK	-0.31091	0.337018	OK	-0.0559911	0.846362	OK	FUNDC1	-0.418561	0.323928	-1.29214	0.196308	0.460985	OK	0.111715	0.311746	0.358353	0.720079	0.915766	OK
ENSG00000069667.16	9	21	19	44	57	41	6	8	9	21	17	37	14	12	17	35	43	34	0.672837	0.257313	OK	0.736478	0.356462	OK	1.76807	0.00393438	OK	RORA	-0.743768	0.536693	-1.38584	0.165797	0.421349	OK	-0.313055	0.486185	-0.6439	0.51964	0.823679	OK
ENSG00000069849.11	841	810	901	867	552	615	714	443	713	821	421	566	842	751	1047	823	626	751	-0.0735992	0.526284	OK	-0.122822	0.356244	OK	-0.0281791	0.818879	OK	ATP1B3	-0.214964	0.129019	-1.66614	0.0956852	0.304541	OK	0.142381	0.129486	1.09959	0.271511	0.632481	OK
ENSG00000069869.16	607	668	632	780	574	480	601	417	614	658	344	475	692	596	758	567	451	477	0.171605	0.168472	OK	-0.201717	0.124665	OK	-0.257803	0.0334841	OK	NEDD4	-0.319174	0.140264	-2.27552	0.0228747	0.118348	OK	-0.266238	0.136673	-1.94799	0.0514164	0.268299	OK
ENSG00000069943.10	94	113	90	146	61	69	98	56	104	91	52	72	93	94	116	95	88	86	0.231847	0.400948	OK	-0.338943	0.232278	OK	0.239864	0.313282	OK	PIGB	-0.378317	0.290691	-1.30144	0.193107	0.456397	OK	0.0457916	0.273397	0.167491	0.866984	0.965731	OK
ENSG00000069956.12	757	787	802	2494	1719	1834	710	487	794	1641	975	1504	558	557	705	1572	1364	1500	1.71662	1.83948e-68	OK	1.05668	4.91209e-21	OK	1.69746	1.45322e-52	OK	MAPK6	-0.572178	0.105452	-5.42595	5.76479e-08	2.26496e-06	OK	-0.377905	0.109206	-3.46047	0.000539224	0.00992718	OK
ENSG00000069966.18	454	441	418	404	305	249	281	190	298	289	155	217	399	302	442	337	254	278	-0.116349	0.457304	OK	-0.252154	0.14756	OK	-0.0973829	0.516075	OK	GNB5	-0.613485	0.183466	-3.34386	0.000826221	0.00966642	OK	-0.10215	0.170978	-0.597444	0.550211	0.843528	OK
ENSG00000069974.16	313	308	318	377	214	220	275	159	282	329	146	200	266	219	307	249	167	196	0.0281533	0.85586	OK	-0.0291301	0.883952	OK	-0.0223706	0.913321	OK	RAB27A	-0.170173	0.184446	-0.922617	0.356207	0.635025	OK	-0.308313	0.191271	-1.61191	0.106981	0.40494	OK
ENSG00000069998.12	162	202	229	123	116	127	169	162	242	183	165	215	152	173	258	142	170	193	-0.383749	0.103635	OK	-0.0825472	0.717455	OK	0.0726853	0.754698	OK	HDHD5	0.562617	0.251864	2.23381	0.0254956	0.126823	OK	0.445885	0.248353	1.79537	0.0725946	0.325041	OK
ENSG00000070010.19	437	406	349	430	263	303	383	262	411	479	265	368	442	400	507	441	345	362	-0.15873	0.323799	OK	0.00772216	0.958964	OK	-0.0629969	0.66367	OK	UFD1	0.173958	0.145664	1.19424	0.232384	0.505643	OK	0.179325	0.155739	1.15144	0.24955	0.61083	OK
ENSG00000070018.9	809	939	859	1355	853	794	655	498	805	944	488	742	795	745	929	841	674	692	0.799403	4.64159e-06	OK	0.396743	0.00119988	OK	0.48789	0.0121782	OK	LRP6	-0.606757	0.173472	-3.49773	0.000469241	0.00610292	OK	-0.30362	0.208407	-1.45686	0.145155	0.480343	OK
ENSG00000070047.12	806	869	752	662	490	471	734	503	785	642	439	553	839	744	858	566	469	533	-0.337282	0.00316705	OK	-0.404631	0.00133509	OK	-0.449029	0.000230435	OK	PHRF1	-0.058986	0.135153	-0.436438	0.662519	0.849728	OK	-0.0965336	0.133472	-0.723248	0.469528	0.793731	OK
ENSG00000070061.15	331	350	332	401	224	172	391	250	430	384	204	302	296	298	389	268	194	218	-0.0155013	0.948067	OK	-0.129817	0.47063	OK	-0.36353	0.0367981	OK	ELP1	0.106077	0.253939	0.417727	0.676147	0.857117	OK	-0.339923	0.253294	-1.34201	0.179594	0.52973	OK
ENSG00000070081.17	886	1026	1053	960	672	765	780	651	1078	908	586	954	1171	1066	1357	948	914	1056	-0.00920924	0.932252	OK	-0.113544	0.427908	OK	-0.0413713	0.758999	OK	NUCB2	0.00756584	0.126816	0.0596601	0.952426	0.981849	OK	0.291028	0.144636	2.01215	0.0442044	0.24481	OK
ENSG00000070087.14	2096	2326	2118	2227	1406	1384	1771	1265	1987	2408	1342	1794	2178	1883	2363	2032	1840	1730	-0.116596	0.181214	OK	0.0835389	0.367389	OK	0.0132294	0.892943	OK	PFN2	0.12003	0.100199	1.19791	0.23095	0.503857	OK	0.17449	0.10516	1.65929	0.0970572	0.384837	OK
ENSG00000070159.14	18	19	30	29	26	15	19	20	23	21	16	19	21	36	35	30	21	31	0.747467	0.157672	OK	-0.27385	0.588851	OK	0.561168	0.248368	OK	PTPN3	-0.847656	0.528739	-1.60316	0.108898	0.330625	OK	0.213466	0.544551	0.392004	0.695055	0.907085	OK
ENSG00000070214.16	720	810	771	738	488	407	342	321	461	400	267	367	805	691	888	698	460	539	-0.357515	0.00994389	OK	-0.0547646	0.75657	OK	-0.274163	0.0456903	OK	SLC44A1	-0.550159	0.1727	-3.18563	0.0014444	0.0150405	OK	0.159162	0.165685	0.960628	0.336739	0.69591	OK
ENSG00000070269.14	166	191	193	182	106	110	126	91	164	123	99	100	187	155	209	164	115	123	-0.44583	0.0586559	OK	0.0287664	0.921196	OK	-0.281435	0.180562	OK	TMEM260	0.0980399	0.287959	0.340465	0.733507	0.887926	OK	0.115828	0.223432	0.518406	0.604175	0.872771	OK
ENSG00000070366.14	737	923	818	1053	744	719	675	478	792	1005	594	866	771	671	839	771	732	678	0.196898	0.170463	OK	0.343452	0.00558715	OK	0.558514	0.000397412	OK	SMG6	-0.040755	0.139028	-0.293142	0.769414	0.905064	OK	0.0507935	0.172233	0.294912	0.768061	0.93481	OK
ENSG00000070367.16	707	826	803	751	455	515	757	561	918	873	409	646	774	715	936	672	475	517	-0.125357	0.313552	OK	-0.254655	0.0972034	OK	-0.25619	0.0564675	OK	EXOC5	0.0536906	0.144051	0.372721	0.709356	0.8738	OK	0.00076938	0.140914	0.00545992	0.995644	0.998454	OK
ENSG00000070371.16	221	191	176	255	107	110	122	84	189	152	80	106	204	166	214	150	94	102	0.117031	0.595598	OK	-0.347493	0.192841	OK	-0.566611	0.0126414	OK	CLTCL1	-0.67369	0.225078	-2.99315	0.00276118	0.0246893	OK	-0.557854	0.235864	-2.36515	0.0180226	0.136447	OK
ENSG00000070404.10	1844	1833	1703	2098	1402	1487	3268	2333	3123	4023	2206	2946	2445	2255	2668	2352	2017	1984	0.226692	0.0147731	OK	-0.0344882	0.721098	OK	-0.00136288	0.988642	OK	FSTL3	0.722884	0.0994891	7.26596	3.70386e-13	3.06605e-11	OK	0.267607	0.103136	2.5947	0.00946744	0.0883268	OK
ENSG00000070413.20	1102	1274	1118	1210	773	904	778	674	962	1004	637	946	1191	1207	1401	1233	988	995	-0.0496279	0.6794	OK	0.10339	0.362468	OK	-0.130932	0.330265	OK	DGCR2	-0.088417	0.125598	-0.703967	0.481453	0.73657	OK	0.0903778	0.122644	0.736909	0.461178	0.787989	OK
ENSG00000070423.18	340	378	354	330	212	259	392	241	342	411	249	383	327	347	410	290	314	338	-0.201124	0.174289	OK	-0.0174926	0.911331	OK	-0.00538868	0.973791	OK	RNF126	0.301452	0.160343	1.88005	0.0601015	0.225694	OK	0.216183	0.177652	1.21689	0.223645	0.581425	OK
ENSG00000070444.15	261	282	327	2039	1296	1478	249	174	289	1751	765	1387	267	283	361	2313	1368	2003	2.65867	7.67046e-51	OK	1.87416	5.0941e-32	OK	2.92403	1.79155e-57	OK	MNT	-0.60423	0.156361	-3.86433	0.000111397	0.00184196	OK	0.0123673	0.177282	0.0697604	0.944384	0.986248	OK
ENSG00000070476.15	172	189	177	189	128	126	156	101	200	189	103	182	151	154	197	149	125	122	-0.0506196	0.784536	OK	-0.0888814	0.679919	OK	-0.150426	0.45348	OK	ZXDC	-0.00212469	0.203086	-0.010462	0.991653	0.997448	OK	-0.146603	0.204668	-0.7163	0.473806	0.796102	OK
ENSG00000070495.14	193	179	187	723	518	483	258	155	255	671	491	628	204	158	217	602	660	618	1.9939	4.2122e-31	OK	1.64949	5.566e-19	OK	2.11544	1.15671e-38	OK	JMJD6	0.0712882	0.16421	0.434129	0.664195	0.850287	OK	0.0994124	0.152721	0.650941	0.515084	0.821078	OK
ENSG00000070501.12	109	115	111	138	93	87	92	79	106	122	67	111	78	87	121	80	88	75	0.218053	0.354457	OK	0.0689619	0.781374	OK	0.00546345	0.983991	OK	POLB	-0.0109243	0.244643	-0.0446539	0.964383	0.986877	OK	-0.412593	0.256407	-1.60913	0.107587	0.406414	OK
ENSG00000070540.13	338	339	288	549	328	343	460	298	501	761	374	513	505	426	514	621	461	497	0.489953	0.000752018	OK	0.290734	0.0410823	OK	0.369293	0.0057035	OK	WIPI1	0.382801	0.14816	2.58371	0.00977452	0.0643705	OK	0.415307	0.148005	2.80603	0.0050156	0.0556214	OK
ENSG00000070610.14	811	1005	1011	830	718	775	657	482	778	817	535	719	825	899	1029	710	710	826	-0.0569733	0.707676	OK	-0.122896	0.342777	OK	-0.133064	0.387279	OK	GBA2	-0.12068	0.156523	-0.771004	0.440704	0.706265	OK	0.0204088	0.168952	0.120796	0.903852	0.975557	OK
ENSG00000070614.15	8161	8044	7732	7677	4333	4888	9135	6490	9739	10905	5376	7920	9917	8742	9887	8158	5826	5992	-0.287015	0.00133935	OK	-0.167191	0.0902643	OK	-0.418653	0.000105582	OK	NDST1	0.421295	0.105889	3.97866	6.93054e-05	0.00122115	OK	0.163927	0.113631	1.44262	0.149126	0.48674	OK
ENSG00000070669.17	95	171	234	237	213	223	71	183	390	170	203	333	157	462	554	191	300	270	0.855266	0.125865	OK	0.2284	0.744125	OK	-0.167176	0.771386	OK	ASNS	-0.170512	0.306634	-0.556077	0.578158	0.802017	OK	0.0468782	0.290784	0.161213	0.871925	0.967521	OK
ENSG00000070718.12	241	232	217	245	151	163	227	181	268	303	157	207	215	175	232	229	163	185	-0.163387	0.362471	OK	-0.00397745	0.984941	OK	0.31441	0.102198	OK	AP3M2	0.296149	0.223294	1.32628	0.184748	0.445358	OK	0.237201	0.201692	1.17606	0.239573	0.601134	OK
ENSG00000070756.16	11404	12702	11284	15654	10210	10362	13385	9433	14065	19835	10832	14801	10811	10154	12326	12495	11373	11470	0.317274	0.000171587	OK	0.231664	0.00555762	OK	0.229949	0.0070539	OK	PABPC1	0.263521	0.0953489	2.76375	0.00571404	0.0434338	OK	-0.090816	0.0987608	-0.919555	0.357806	0.71235	OK
ENSG00000070759.17	16	11	7	31	27	24	12	9	13	32	20	21	15	5	24	31	28	27	1.54146	0.00379556	OK	1.02025	0.0594377	OK	1.24273	0.0239936	OK	TESK2	-0.246303	0.440803	-0.55876	0.576325	0.801098	OK	0.0994997	0.41944	0.23722	0.812486	0.949659	OK
ENSG00000070761.8	233	281	239	271	185	165	250	189	318	359	206	285	269	200	340	297	275	227	-0.0365547	0.826039	OK	0.0653532	0.672914	OK	0.198917	0.290202	OK	CFAP20	0.377305	0.166756	2.26261	0.0236596	0.120841	OK	0.347641	0.18119	1.91865	0.0550282	0.278606	OK
ENSG00000070770.9	895	919	860	961	595	566	813	550	898	894	468	733	851	718	1044	710	600	626	-0.0380407	0.744507	OK	0.104617	0.419354	OK	-0.075365	0.572081	OK	CSNK2A2	0.115807	0.11833	0.978675	0.327741	0.608404	OK	-0.0462212	0.130412	-0.354425	0.72302	0.916313	OK
ENSG00000070778.13	982	964	967	1285	832	900	1027	679	1136	1204	617	923	1096	968	1222	1115	721	836	0.403488	6.71021e-05	OK	-0.199758	0.0651403	OK	-0.0880477	0.500226	OK	PTPN21	-0.289901	0.114345	-2.53533	0.0112342	0.0710203	OK	-0.178511	0.13694	-1.30357	0.192381	0.543626	OK
ENSG00000070785.17	126	107	93	113	65	90	103	81	117	134	63	107	129	94	115	75	74	78	-0.0161583	0.948989	OK	-0.0436921	0.86212	OK	-0.510641	0.0451993	OK	EIF2B3	0.0730604	0.25992	0.281088	0.778643	0.910087	OK	-0.439615	0.261104	-1.68367	0.0922449	0.373407	OK
ENSG00000070814.20	410	463	476	436	279	294	500	335	541	632	321	483	404	386	507	314	334	436	-0.235041	0.0940081	OK	-0.0714937	0.590155	OK	-0.0555683	0.748841	OK	TCOF1	0.446818	0.140116	3.1889	0.00142814	0.014954	OK	0.140768	0.182419	0.771673	0.440308	0.77223	OK
ENSG00000070831.17	2583	2798	2549	2668	1683	1732	2170	1772	2650	2552	1454	2013	2873	2338	2995	2125	1852	1901	-0.121581	0.140833	OK	-0.196434	0.034113	OK	-0.236492	0.0109945	OK	CDC42	-0.0417674	0.0940227	-0.444227	0.656879	0.846386	OK	-0.0275974	0.0979932	-0.281626	0.77823	0.937937	OK
ENSG00000070882.13	375	425	338	439	311	264	378	253	393	392	197	263	221	228	287	216	198	215	0.169957	0.26805	OK	0.0923202	0.603962	OK	0.141642	0.48062	OK	OSBPL3	-0.103906	0.177323	-0.585971	0.557895	0.788697	OK	-0.742981	0.177268	-4.1913	2.77366e-05	0.000843554	OK
ENSG00000070950.10	135	160	135	118	65	80	184	124	183	176	93	138	129	121	161	93	71	64	0.162348	0.477247	OK	-0.36096	0.0953896	OK	-0.80488	0.00313131	OK	RAD18	0.304535	0.233375	1.30492	0.19192	0.454818	OK	-0.411206	0.269882	-1.52365	0.127596	0.448039	OK
ENSG00000070961.15	1799	1477	1568	3108	2078	1645	863	584	1064	759	315	624	1366	943	1422	858	506	707	0.834485	8.01589e-10	OK	-0.555258	0.000731414	OK	-0.619037	6.16265e-05	OK	ATP2B1	-1.90778	0.163737	-11.6515	2.25554e-31	7.24084e-29	OK	-1.59939	0.147425	-10.8489	2.01934e-27	6.96565e-25	OK
ENSG00000071051.14	292	305	269	305	205	222	229	170	268	336	192	317	259	288	428	326	315	307	-0.00341824	0.982583	OK	0.0942586	0.587549	OK	0.167996	0.349736	OK	NCK2	0.103257	0.169094	0.610648	0.541432	0.778018	OK	0.350849	0.160864	2.18104	0.0291807	0.188889	OK
ENSG00000071054.16	2976	3355	3040	3506	2493	2419	2396	1765	2804	3003	1703	2506	2920	2754	3412	2540	2282	2343	0.216708	0.0168599	OK	0.0492661	0.576821	OK	-0.0650578	0.50713	OK	MAP4K4	-0.278977	0.0965582	-2.88921	0.0038621	0.0323777	OK	-0.303167	0.103589	-2.92665	0.00342635	0.0413247	OK
ENSG00000071082.11	2220	2520	2465	2430	1915	1978	2696	2097	2941	3214	2193	3149	2336	2401	2744	2410	2560	2441	0.122598	0.27417	OK	0.0408648	0.714811	OK	0.167389	0.157773	OK	RPL31	0.329403	0.125542	2.62385	0.00869418	0.0589859	OK	0.181368	0.132779	1.36594	0.171957	0.520676	OK
ENSG00000071127.17	9060	9038	8538	8897	5771	5899	7869	5806	9135	8949	5011	7235	7413	6488	8157	6089	5075	5384	-0.124168	0.177766	OK	-0.173648	0.0247163	OK	-0.246789	0.00269482	OK	WDR1	-0.0823315	0.0941943	-0.87406	0.382086	0.658122	OK	-0.379267	0.0986865	-3.84315	0.000121464	0.00288956	OK
ENSG00000071189.21	428	508	447	548	368	307	386	269	448	483	265	335	463	449	551	471	341	314	0.326124	0.136625	OK	0.451441	0.00594435	OK	0.13334	0.518096	OK	SNX13	-0.103881	0.188131	-0.552172	0.58083	0.804132	OK	-0.221647	0.190317	-1.16462	0.244174	0.606571	OK
ENSG00000071205.12	368	426	351	554	339	394	319	215	316	451	304	395	396	334	445	442	382	449	0.427609	0.00203221	OK	0.300869	0.0450742	OK	0.280123	0.0361879	OK	ARHGAP10	-0.267766	0.14328	-1.86882	0.0616477	0.229217	OK	-0.0758927	0.138746	-0.54699	0.584386	0.862027	OK
ENSG00000071242.12	4911	5275	5602	5189	3222	3728	2352	1618	2842	2872	1363	2244	4450	4003	6444	3724	2795	3804	-0.132406	0.170156	OK	-0.155148	0.13753	OK	-0.283373	0.0461345	OK	RPS6KA2	-0.982097	0.105962	-9.26839	1.88975e-20	2.82647e-18	OK	-0.232396	0.129903	-1.789	0.0736154	0.327657	OK
ENSG00000071243.16	82	79	90	117	87	64	80	53	98	88	53	82	91	82	114	71	78	81	0.308013	0.232754	OK	-0.00372652	0.988842	OK	0.174927	0.512885	OK	ING3	-0.210629	0.268836	-0.783482	0.433344	0.699505	OK	0.191518	0.284551	0.673052	0.500914	0.813226	OK
ENSG00000071246.11	218	244	204	228	180	173	162	151	204	243	161	235	216	214	197	209	160	181	-0.185698	0.333174	OK	0.284832	0.178449	OK	-0.219632	0.265024	OK	VASH1	0.0944214	0.197749	0.477481	0.633019	0.834515	OK	-0.183102	0.186904	-0.979658	0.327255	0.687335	OK
ENSG00000071282.12	206	138	160	351	217	246	290	194	290	556	304	444	431	318	434	491	480	437	0.969174	1.45687e-05	OK	0.831029	6.16917e-09	OK	0.577696	4.32534e-05	OK	LMCD1	0.63259	0.151129	4.18577	2.842e-05	0.000554169	OK	0.853836	0.1536	5.55882	2.71607e-08	1.84468e-06	OK
ENSG00000071462.11	320	362	341	327	196	208	257	213	268	283	156	270	260	264	368	293	245	266	-0.222907	0.134775	OK	-0.12361	0.511134	OK	0.031801	0.8432	OK	BUD23	-0.0708613	0.182189	-0.388943	0.697318	0.867414	OK	0.139199	0.163916	0.849209	0.395765	0.741323	OK
ENSG00000071537.14	2220	2341	2271	2007	1193	1264	2077	1672	2777	2270	1140	1877	2641	2203	3020	1690	1339	1547	-0.422078	0.0012023	OK	-0.404473	0.00166617	OK	-0.4296	6.93859e-05	OK	SEL1L	0.131292	0.146084	0.898738	0.368792	0.646516	OK	0.14122	0.139838	1.00988	0.312553	0.674506	OK
ENSG00000071539.14	60	83	114	91	41	62	140	76	115	142	61	114	49	50	97	35	47	58	-0.408191	0.26172	OK	-0.150703	0.582823	OK	0.0101078	0.977815	OK	TRIP13	0.729845	0.289504	2.52102	0.0117014	0.0728542	OK	-0.126806	0.329314	-0.38506	0.700193	0.909882	OK
ENSG00000071553.17	1865	2008	1937	2015	1322	1461	1816	1343	2074	2431	1401	2000	2175	2113	2527	2141	1885	1929	0.00165073	0.985638	OK	0.0806212	0.37669	OK	0.0646819	0.500938	OK	ATP6AP1	0.210638	0.101586	2.0735	0.0381255	0.167695	OK	0.316182	0.105408	2.99961	0.00270329	0.034672	OK
ENSG00000071564.16	1261	1468	1316	1240	896	997	1034	837	1168	1086	716	1036	1254	1194	1494	1022	966	1032	-0.31284	0.00465418	OK	-0.312373	0.01001	OK	-0.0542631	0.671483	OK	TCF3	0.0203652	0.128128	0.158945	0.873713	0.952759	OK	0.206295	0.134487	1.53395	0.125043	0.443948	OK
ENSG00000071575.11	201	271	262	286	234	259	163	142	228	296	164	249	407	369	443	447	394	437	0.375791	0.0700762	OK	0.397868	0.0280981	OK	0.343607	0.0176584	OK	TRIB2	-0.0983477	0.203908	-0.482315	0.629583	0.832653	OK	0.7181	0.191474	3.75038	0.000176569	0.00393617	OK
ENSG00000071626.16	934	1079	1080	937	702	857	692	520	853	969	527	860	893	980	1149	1027	838	1009	-0.0126766	0.921193	OK	0.12251	0.317082	OK	0.103205	0.354073	OK	DAZAP1	-0.154149	0.139699	-1.10344	0.269837	0.546538	OK	0.176024	0.140404	1.25369	0.209953	0.566402	OK
ENSG00000071655.18	1134	1138	1073	1018	653	734	1055	653	983	1072	633	890	1002	944	1192	885	827	790	-0.248755	0.0207962	OK	-0.163617	0.209914	OK	-0.195314	0.0804177	OK	MBD3	0.0777423	0.119678	0.649594	0.515955	0.761669	OK	0.0291769	0.116998	0.249379	0.803067	0.94756	OK
ENSG00000071794.16	374	420	400	412	254	250	324	265	386	371	218	268	344	277	383	272	245	207	-0.185238	0.18794	OK	-0.338823	0.0201279	OK	-0.28827	0.0914925	OK	HLTF	-0.0424244	0.151532	-0.27997	0.779501	0.91012	OK	-0.134173	0.168349	-0.796996	0.425453	0.762518	OK
ENSG00000071859.15	478	566	546	592	377	481	468	338	584	682	410	613	580	433	621	571	592	655	0.212993	0.117775	OK	0.331473	0.0134624	OK	0.556153	3.46398e-05	OK	FAM50A	0.129844	0.14439	0.899256	0.368516	0.646296	OK	0.332164	0.144646	2.29639	0.0216534	0.154931	OK
ENSG00000071889.16	257	306	267	294	222	192	238	175	266	298	217	290	284	312	327	286	239	255	0.0185303	0.909491	OK	0.0171324	0.928355	OK	-0.207644	0.179925	OK	FAM3A	0.0914949	0.174505	0.52431	0.600063	0.816722	OK	0.0655891	0.167627	0.39128	0.69559	0.907085	OK
ENSG00000071894.17	712	756	694	655	438	436	665	407	638	745	353	516	684	695	778	578	466	482	-0.20607	0.149343	OK	-0.219598	0.150572	OK	-0.402194	0.00816573	OK	CPSF1	-0.0565454	0.169868	-0.33288	0.739225	0.892048	OK	-0.0671012	0.16546	-0.405543	0.685079	0.904514	OK
ENSG00000071967.12	4084	4853	5198	4030	2677	2947	1747	1463	2625	2334	1180	2008	4676	4380	6096	4120	2971	3488	-0.290886	0.00627694	OK	-0.125569	0.296505	OK	-0.271081	0.0133796	OK	CYBRD1	-0.835446	0.107987	-7.73655	1.02149e-14	1.01089e-12	OK	0.150311	0.112605	1.33484	0.181928	0.531945	OK
ENSG00000071994.11	358	398	418	339	246	208	360	227	360	376	200	330	348	265	352	228	211	221	-0.253257	0.117411	OK	-0.155641	0.361881	OK	-0.256893	0.127981	OK	PDCD2	0.127663	0.16365	0.780096	0.435335	0.701101	OK	-0.210234	0.172481	-1.21888	0.22289	0.580203	OK
ENSG00000072041.17	59	35	28	129	73	76	17	19	22	60	31	45	30	24	29	91	51	68	1.13058	0.00428731	OK	1.38823	0.00114944	OK	1.2982	0.000337109	OK	SLC6A15	-0.946688	0.317339	-2.9832	0.0028525	0.0253338	OK	-0.571647	0.292786	-1.95244	0.050886	0.266806	OK
ENSG00000072042.13	1122	789	689	1500	645	754	1140	584	968	1731	717	1010	1274	823	955	1392	902	989	0.338309	0.102896	OK	0.265654	0.107935	OK	0.327793	0.0530391	OK	RDH11	0.221522	0.181116	1.22309	0.221295	0.492175	OK	0.229311	0.181734	1.2618	0.207022	0.564454	OK
ENSG00000072062.14	1530	1731	1601	1390	946	933	1330	1041	1424	1426	867	1186	1578	1424	1769	1220	1148	1256	-0.286411	0.00205496	OK	-0.208326	0.048001	OK	-0.196544	0.0570166	OK	PRKACA	0.0236199	0.1066	0.221574	0.824645	0.930793	OK	0.0909095	0.112889	0.805299	0.420647	0.758316	OK
ENSG00000072071.16	192	243	267	178	154	164	146	137	175	165	91	197	233	233	247	170	132	177	-0.327612	0.25584	OK	-0.634285	0.00457	OK	-0.540264	0.0514449	OK	ADGRL1	-0.809945	0.307006	-2.6382	0.00833472	0.0570175	OK	-0.227416	0.319008	-0.712884	0.475918	0.796416	OK
ENSG00000072110.13	15342	13942	13616	15640	9066	9245	17719	12171	18646	18992	9960	13585	18485	14976	17666	14568	10530	10437	0.0192204	0.858925	OK	-0.130787	0.1401	OK	-0.135286	0.259522	OK	ACTN1	0.297355	0.10679	2.78448	0.00536137	0.0415096	OK	0.138012	0.122705	1.12475	0.260696	0.622101	OK
ENSG00000072121.16	345	343	321	436	227	184	346	188	312	440	189	279	292	279	319	282	203	235	0.0774386	0.626567	OK	0.0683869	0.708135	OK	-0.138331	0.447579	OK	ZFYVE26	-0.0358576	0.190115	-0.18861	0.850399	0.941978	OK	-0.090943	0.178139	-0.510518	0.609688	0.875238	OK
ENSG00000072133.11	55	55	75	54	35	32	44	21	60	56	25	38	62	40	84	43	36	28	-0.0815121	0.812299	OK	-0.105664	0.78736	OK	-0.669841	0.0641268	OK	RPS6KA6	-0.331175	0.375111	-0.882874	0.377305	0.654333	OK	-0.41931	0.383486	-1.09342	0.274211	0.635411	OK
ENSG00000072134.15	395	434	476	351	281	306	265	238	380	267	156	272	445	387	498	309	216	294	0.138613	0.494356	OK	-0.153728	0.557512	OK	-0.683735	2.47262e-05	OK	EPN2	-0.553151	0.291695	-1.89633	0.0579159	0.220187	OK	-0.2889	0.22525	-1.28258	0.199641	0.554208	OK
ENSG00000072135.13	25	29	36	30	27	29	39	25	41	55	27	41	26	25	30	26	29	35	0.0987119	0.864382	OK	-0.142864	0.733747	OK	1.03173	0.0228261	OK	PTPN18	0.302243	0.455564	0.663448	0.507043	0.756227	OK	0.671526	0.479425	1.40069	0.161306	0.50608	OK
ENSG00000072163.19	453	347	347	326	156	217	460	384	536	535	320	402	551	390	397	384	266	263	-0.473606	0.00466888	OK	-0.2638	0.0547541	OK	-0.31838	0.126878	OK	LIMS2	0.802458	0.152125	5.275	1.32756e-07	4.88082e-06	OK	0.441766	0.191885	2.30224	0.0213214	0.153392	OK
ENSG00000072195.15	1327	1325	1240	1450	1053	1139	1451	973	1346	2053	1291	1619	1272	1324	1355	1255	1356	1213	0.192232	0.0735124	OK	0.407201	0.000890043	OK	0.285149	0.0686621	OK	SPEG	0.39318	0.120849	3.2535	0.00113994	0.0124824	OK	0.0979914	0.143305	0.683798	0.494103	0.808375	OK
ENSG00000072210.19	358	357	331	396	244	208	227	168	276	363	136	204	361	233	333	291	165	209	-0.246368	0.157999	OK	-0.0258016	0.898608	OK	-0.0613971	0.788875	OK	ALDH3A2	-0.244075	0.213652	-1.14239	0.253291	0.527335	OK	-0.0688234	0.24169	-0.28476	0.775828	0.937286	OK
ENSG00000072274.13	1069	1546	1661	995	810	930	882	870	1605	970	680	1176	981	1322	1806	805	809	948	-0.370833	0.029349	OK	-0.224027	0.301676	OK	-0.423419	0.0125895	OK	TFRC	0.0796407	0.194351	0.409778	0.681969	0.859184	OK	-0.114328	0.162412	-0.703936	0.481472	0.80003	OK
ENSG00000072310.17	1089	938	951	1401	895	929	587	361	593	907	560	759	1221	934	1084	1429	1002	1063	0.459414	7.15969e-06	OK	0.636348	3.04387e-06	OK	0.704484	6.09023e-06	OK	SREBF1	-0.434057	0.127943	-3.39258	0.000692374	0.00837595	OK	0.326801	0.12699	2.57344	0.0100693	0.0920423	OK
ENSG00000072364.13	2903	2872	2878	4328	2800	2796	2666	1925	2910	3679	1943	2912	3036	2392	3174	3020	2538	2627	0.508302	9.1539e-09	OK	0.156543	0.139277	OK	-0.0838667	0.415399	OK	AFF4	-0.263511	0.103017	-2.55795	0.0105292	0.0679341	OK	-0.317562	0.104671	-3.03392	0.00241397	0.0322552	OK
ENSG00000072401.15	110	159	133	125	81	92	87	97	124	151	54	93	112	102	117	89	72	76	-0.212957	0.361853	OK	-0.179483	0.509999	OK	-0.265262	0.270388	OK	UBE2D1	-0.00302912	0.265788	-0.0113968	0.990907	0.997332	OK	-0.169811	0.247425	-0.686312	0.492516	0.808095	OK
ENSG00000072415.9	337	369	435	448	331	333	320	246	385	473	287	324	325	347	472	397	339	318	0.221626	0.235773	OK	0.116722	0.558961	OK	-0.00863268	0.962046	OK	MPP5	-0.0342092	0.179987	-0.190064	0.849259	0.94138	OK	-0.0473288	0.149408	-0.316776	0.751414	0.928325	OK
ENSG00000072422.17	417	457	381	662	334	313	387	260	386	569	295	435	403	355	398	510	400	403	0.230468	0.225334	OK	0.226404	0.123796	OK	0.411212	0.00542589	OK	RHOBTB1	-0.0566912	0.191623	-0.295848	0.767346	0.903867	OK	0.118319	0.192829	0.613595	0.539483	0.837756	OK
ENSG00000072501.17	703	797	811	725	413	499	760	459	835	811	390	651	647	601	931	487	421	451	-0.225419	0.156762	OK	-0.118792	0.544414	OK	-0.212051	0.142755	OK	SMC1A	0.179537	0.197793	0.907704	0.364034	0.642741	OK	-0.197915	0.141732	-1.3964	0.162594	0.507963	OK
ENSG00000072506.12	292	318	253	320	158	174	307	206	251	345	209	255	331	272	315	290	233	216	-0.16979	0.337315	OK	-0.00553549	0.975022	OK	-0.0994755	0.546516	OK	HSD17B10	0.254208	0.183689	1.3839	0.166388	0.421883	OK	0.166765	0.189821	0.878538	0.379652	0.729048	OK
ENSG00000072518.20	406	456	462	366	305	276	384	286	421	339	222	300	408	417	479	258	281	271	-0.240265	0.100792	OK	-0.469018	0.00172331	OK	-0.537385	0.000681989	OK	MARK2	-0.165003	0.159495	-1.03454	0.300886	0.580367	OK	-0.244745	0.166608	-1.46898	0.141838	0.475014	OK
ENSG00000072571.20	66	52	68	113	47	51	88	55	83	130	56	92	33	28	51	17	34	50	0.310021	0.358163	OK	-0.0628622	0.838788	OK	-0.0725631	0.883937	OK	HMMR	0.305806	0.291023	1.0508	0.293352	0.572269	OK	-1.03252	0.431548	-2.39259	0.01673	0.128847	OK
ENSG00000072609.17	384	347	268	356	205	243	326	218	343	367	215	288	401	346	395	354	265	287	-0.0819949	0.61147	OK	-0.250038	0.0938025	OK	-0.179116	0.276707	OK	CHFR	0.00224867	0.157279	0.0142973	0.988593	0.996164	OK	0.145561	0.157011	0.927078	0.353886	0.710591	OK
ENSG00000072657.9	333	434	469	373	271	227	232	195	279	252	168	263	328	360	473	268	185	248	0.0305835	0.900864	OK	-0.292785	0.133987	OK	-0.532132	0.00762508	OK	TRHDE	-0.747008	0.26288	-2.84163	0.00448833	0.0364663	OK	-0.167185	0.2845	-0.587644	0.556771	0.846919	OK
ENSG00000072682.18	1168	1678	1639	1285	1186	1305	1889	1804	2686	2432	1742	2311	1927	2222	2636	1794	1946	2116	0.111228	0.496452	OK	-0.052106	0.69956	OK	0.0132143	0.926082	OK	P4HA2	0.660607	0.149067	4.43162	9.35289e-06	0.000211154	OK	0.54469	0.161498	3.37274	0.00074423	0.0126529	OK
ENSG00000072736.19	259	318	371	381	253	245	302	213	328	376	193	276	303	245	377	281	285	287	0.234817	0.190498	OK	-0.212272	0.180552	OK	-0.0294627	0.868838	OK	NFATC3	-0.0698248	0.164172	-0.425316	0.670606	0.854372	OK	-0.0461861	0.171514	-0.269285	0.787711	0.941577	OK
ENSG00000072756.17	152	171	145	175	123	120	135	78	155	147	90	137	195	135	166	126	151	147	-0.02599	0.898289	OK	0.113837	0.628718	OK	-0.191928	0.44301	OK	TRNT1	-0.067457	0.218126	-0.309257	0.757126	0.900486	OK	0.0502408	0.232432	0.216153	0.828869	0.953921	OK
ENSG00000072778.20	2196	2546	2496	1940	1347	1822	2369	1872	2805	2439	1606	2345	2254	2510	3136	1874	1817	2162	-0.229064	0.120638	OK	-0.168166	0.0921376	OK	-0.148331	0.268436	OK	ACADVL	0.3079	0.157109	1.95978	0.050021	0.200419	OK	0.145291	0.170677	0.851262	0.394624	0.740207	OK
ENSG00000072786.13	434	404	411	358	226	258	428	267	375	339	223	276	472	443	486	293	219	237	-0.0543967	0.799561	OK	-0.459402	0.0176058	OK	-0.259231	0.0934096	OK	STK10	-0.410211	0.235402	-1.7426	0.0814034	0.27389	OK	-0.0660126	0.2385	-0.276783	0.781947	0.939569	OK
ENSG00000072803.17	748	827	737	778	509	537	792	549	780	900	506	689	743	725	840	641	581	597	-0.0799487	0.484253	OK	0.0104624	0.933082	OK	-0.0753342	0.523566	OK	FBXW11	0.147021	0.127194	1.15588	0.24773	0.522034	OK	0.0133397	0.128165	0.104082	0.917104	0.97768	OK
ENSG00000072840.13	1956	2100	1959	2219	1451	1379	1027	699	1153	1291	643	967	1585	1224	1605	1141	934	957	0.129928	0.132363	OK	-0.0687123	0.509911	OK	-0.275287	0.00933169	OK	EVC	-0.972072	0.103688	-9.37501	6.91668e-21	1.08378e-18	OK	-0.834288	0.107538	-7.75805	8.62462e-15	1.25613e-12	OK
ENSG00000072849.11	423	418	384	394	220	229	371	282	415	411	284	361	443	352	398	387	335	307	-0.0772798	0.651002	OK	0.214442	0.145896	OK	0.215019	0.23118	OK	DERL2	0.404698	0.159326	2.54007	0.0110832	0.0702681	OK	0.448544	0.165912	2.70351	0.0068612	0.0696103	OK
ENSG00000072864.15	191	184	177	196	151	150	123	106	168	212	113	171	167	149	218	171	170	124	-0.0978732	0.60328	OK	0.27916	0.206233	OK	-0.00371926	0.985783	OK	NDE1	0.291989	0.198603	1.47021	0.141505	0.385608	OK	0.0628354	0.196713	0.319426	0.749404	0.927788	OK
ENSG00000072954.7	42	55	50	41	18	16	26	32	39	22	17	17	25	33	41	28	30	27	-0.765169	0.0531309	OK	-1.32571	0.00702163	OK	-0.0992122	0.809759	OK	TMEM38A	-0.857457	0.497522	-1.72346	0.084806	0.281804	OK	0.204866	0.448412	0.456871	0.647764	0.892814	OK
ENSG00000072958.8	706	829	737	724	460	465	780	468	708	784	388	625	753	746	852	619	476	555	-0.172288	0.174973	OK	-0.253642	0.0645928	OK	-0.331396	0.0107361	OK	AP1M1	-0.0192576	0.144417	-0.133348	0.893918	0.962513	OK	-0.157118	0.150878	-1.04136	0.29771	0.658964	OK
ENSG00000073008.15	1945	2056	2045	2201	1462	1569	2331	1635	2642	2517	1436	2021	2129	2111	2969	1771	1577	1840	-0.0257624	0.784996	OK	-0.285564	0.0014375	OK	-0.218594	0.0938849	OK	PVR	0.109146	0.100798	1.08282	0.278887	0.557012	OK	0.0459278	0.13486	0.340558	0.733437	0.920899	OK
ENSG00000073050.11	363	401	386	454	272	298	308	201	313	393	209	315	303	280	355	289	241	232	0.0426724	0.781964	OK	-0.029621	0.846905	OK	-0.247131	0.156694	OK	XRCC1	-0.320258	0.159007	-2.01411	0.0439985	0.183669	OK	-0.504708	0.16171	-3.12108	0.00180192	0.0258418	OK
ENSG00000073060.16	887	747	717	910	504	524	493	294	399	584	288	411	1005	781	948	949	576	657	-0.0155988	0.933965	OK	0.208744	0.365253	OK	-0.239165	0.181859	OK	SCARB1	-0.451854	0.231363	-1.95301	0.0508188	0.202383	OK	0.181329	0.199587	0.908519	0.363604	0.71785	OK
ENSG00000073111.14	236	274	296	252	158	191	272	178	222	346	180	253	144	168	237	179	138	190	-0.084243	0.624259	OK	0.138103	0.52598	OK	0.0369039	0.876767	OK	MCM2	0.358985	0.175214	2.04883	0.0404787	0.17451	OK	-0.318417	0.195086	-1.63219	0.10264	0.396407	OK
ENSG00000073150.14	110	107	73	107	78	84	107	66	78	137	72	80	93	97	99	99	80	89	0.145044	0.574254	OK	0.0530878	0.848609	OK	0.106824	0.658428	OK	PANX2	-0.0143641	0.256197	-0.0560666	0.955289	0.983227	OK	-0.0423715	0.246182	-0.172114	0.863348	0.964689	OK
ENSG00000073169.14	189	171	163	171	119	133	130	91	132	188	85	147	218	179	226	201	145	140	-0.011101	0.953801	OK	0.141059	0.51135	OK	-0.19039	0.31901	OK	SELENOO	-0.0488046	0.208483	-0.234094	0.814912	0.926241	OK	0.127157	0.201788	0.630151	0.528596	0.8281	OK
ENSG00000073331.18	143	130	97	151	88	70	94	51	97	98	57	82	96	77	108	80	79	62	0.197346	0.452785	OK	0.156021	0.620731	OK	-0.0675768	0.811189	OK	ALPK1	-0.494017	0.260314	-1.89778	0.0577254	0.219717	OK	-0.514376	0.275236	-1.86885	0.061643	0.297204	OK
ENSG00000073350.13	24	27	19	22	10	11	11	5	11	13	10	16	11	7	13	11	7	7	-0.840839	0.145379	OK	1.38532	0.0565416	OK	-0.0546748	0.94589	OK	LLGL2	0.551325	0.70392	0.783222	0.433497	0.699569	OK	-0.557874	0.771632	-0.72298	0.469692	0.793731	OK
ENSG00000073417.15	207	253	235	247	206	167	196	146	288	240	135	225	215	218	283	197	194	222	0.227188	0.331638	OK	-0.362749	0.1131	OK	-0.0384461	0.858783	OK	PDE8A	-0.45336	0.227041	-1.99682	0.0458443	0.188799	OK	-0.165225	0.251699	-0.656439	0.511542	0.81803	OK
ENSG00000073464.12	174	163	147	216	153	159	90	65	110	147	77	135	191	142	178	165	150	176	0.538739	0.00894443	OK	0.58665	0.02304	OK	0.172527	0.381457	OK	CLCN4	-0.551088	0.243862	-2.25983	0.0238317	0.121534	OK	-0.251898	0.213394	-1.18044	0.237826	0.600196	OK
ENSG00000073536.18	131	178	149	135	80	89	155	97	156	137	76	143	142	117	164	127	113	111	-0.914882	0.00182466	OK	-0.558551	0.0268395	OK	-0.557552	0.0346734	OK	NLE1	0.419833	0.293898	1.4285	0.153147	0.404448	OK	0.170656	0.304229	0.560947	0.574834	0.856241	OK
ENSG00000073578.17	796	908	852	585	427	364	590	402	728	628	357	466	700	615	864	431	414	413	-0.589724	2.41205e-06	OK	-0.331074	0.0190875	OK	-0.445124	0.000782488	OK	SDHA	-0.00798118	0.139845	-0.0570718	0.954488	0.982634	OK	-0.0802042	0.147094	-0.545256	0.585577	0.863123	OK
ENSG00000073584.20	1400	1507	1506	1455	852	962	940	730	1145	1100	693	951	1359	1190	1499	1237	961	1014	-0.0911524	0.373472	OK	-0.0821052	0.458344	OK	-0.0711857	0.49719	OK	SMARCE1	-0.282347	0.116047	-2.43304	0.0149725	0.0883088	OK	-0.0238129	0.115973	-0.205331	0.837313	0.956477	OK
ENSG00000073605.18	16	22	15	20	13	18	44	23	27	34	10	17	28	16	37	21	12	15	0.674547	0.239083	OK	-1.3693	0.00368597	OK	-0.294696	0.611256	OK	GSDMB	-0.961589	0.577761	-1.66434	0.0960448	0.305054	OK	-0.640824	0.630426	-1.01649	0.309394	0.67178	OK
ENSG00000073614.13	900	1050	957	1300	876	884	817	574	992	1203	672	926	893	831	1169	966	929	938	0.359923	0.00937911	OK	0.482298	0.00472085	OK	0.579713	0.000949971	OK	KDM5A	-0.0830138	0.143785	-0.577347	0.563705	0.7928	OK	0.0032447	0.133797	0.0242508	0.980653	0.995907	OK
ENSG00000073711.11	550	499	489	664	383	380	486	309	529	538	317	450	499	401	517	449	357	348	0.178019	0.215155	OK	0.0449903	0.752053	OK	0.0362024	0.794601	OK	PPP2R3A	-0.0865749	0.149001	-0.581035	0.561217	0.791233	OK	-0.241015	0.153073	-1.57451	0.11537	0.424675	OK
ENSG00000073712.15	3184	3250	3122	2938	2136	1997	3123	2451	3925	2566	1543	2150	3698	2973	4134	2409	2082	2021	-0.184502	0.0534763	OK	-0.633772	4.98835e-12	OK	-0.457367	3.35832e-06	OK	FERMT2	-0.18949	0.103451	-1.83169	0.0669976	0.241055	OK	-0.0663289	0.108081	-0.613695	0.539417	0.837756	OK
ENSG00000073737.16	34	55	26	34	51	40	14	41	63	50	44	80	20	41	31	31	38	25	0.397465	0.339385	OK	0.689406	0.175588	OK	0.0154201	0.972054	OK	DHRS9	0.481493	0.397671	1.21078	0.225979	0.498643	OK	-0.552369	0.422072	-1.30871	0.190633	0.542394	OK
ENSG00000073756.12	69	97	137	473	671	864	51	76	122	270	229	423	61	125	244	213	275	625	3.05961	8.59381e-12	OK	1.83849	3.80569e-10	OK	1.74062	0.0128137	OK	PTGS2	-1.19304	0.458921	-2.59967	0.00933142	0.061999	OK	-0.794908	0.631117	-1.25953	0.20784	0.564987	OK
ENSG00000073792.15	1071	1242	1123	1357	979	1007	599	559	891	839	528	825	1121	1049	1416	1180	963	1039	0.236143	0.0206374	OK	0.00905949	0.950362	OK	0.0136697	0.902667	OK	IGF2BP2	-0.653557	0.124086	-5.26699	1.3868e-07	5.0703e-06	OK	-0.0783692	0.116034	-0.675401	0.499421	0.812412	OK
ENSG00000073803.14	202	242	234	364	265	268	121	103	157	262	179	299	249	185	259	326	354	316	0.408461	0.0106584	OK	0.543925	0.0244925	OK	0.37728	0.0165891	OK	MAP3K13	-0.521172	0.218437	-2.38591	0.0170368	0.0962125	OK	0.0815572	0.156829	0.520038	0.603037	0.872523	OK
ENSG00000073849.15	132	129	104	177	109	72	112	94	130	159	112	141	173	143	156	202	135	151	0.199785	0.441144	OK	-0.182401	0.547178	OK	0.140764	0.558793	OK	ST6GAL1	0.261515	0.256581	1.01923	0.308094	0.587396	OK	0.471837	0.25603	1.8429	0.0653436	0.306633	OK
ENSG00000073921.18	5277	5551	5898	4918	3447	3743	5222	4086	7045	5709	3419	5164	7810	6514	8689	6018	4964	5121	-0.210237	0.0309221	OK	-0.166242	0.12607	OK	-0.12778	0.15658	OK	PICALM	0.310822	0.105116	2.95695	0.00310703	0.0272269	OK	0.580927	0.0978267	5.93833	2.87934e-09	2.24657e-07	OK
ENSG00000073969.18	643	686	598	549	317	369	537	397	560	506	310	405	707	521	673	508	361	385	-0.346721	0.00508367	OK	-0.300816	0.0228653	OK	-0.416451	0.00546266	OK	NSF	0.00445537	0.14031	0.0317537	0.974668	0.990511	OK	0.000883833	0.152833	0.00578301	0.995386	0.99845	OK
ENSG00000074047.21	142	157	157	92	58	95	148	82	140	79	33	72	170	163	214	134	69	99	-0.802269	0.000763855	OK	-0.107561	0.790981	OK	-0.53707	0.0149981	OK	GLI2	0.361801	0.42103	0.859323	0.390162	0.664979	OK	0.531161	0.270741	1.96188	0.0497765	0.262669	OK
ENSG00000074054.18	772	901	735	1115	732	679	725	545	889	1034	640	800	790	714	824	807	714	730	0.295942	0.0217032	OK	0.181014	0.164679	OK	0.397211	0.0018952	OK	CLASP1	-0.0989928	0.12338	-0.802341	0.422356	0.690079	OK	-0.00661963	0.127857	-0.0517736	0.958709	0.990062	OK
ENSG00000074071.14	377	392	402	316	251	261	297	220	356	405	234	298	365	312	410	324	307	334	-0.257993	0.0865599	OK	-0.0442137	0.768853	OK	-0.0370264	0.802568	OK	MRPS34	0.0587394	0.161279	0.364209	0.715702	0.877591	OK	0.129076	0.163885	0.787604	0.430928	0.765852	OK
ENSG00000074181.9	36	54	50	38	24	28	40	33	49	37	33	47	37	56	71	35	22	23	-0.0755699	0.858291	OK	-0.400314	0.340097	OK	-1.13807	0.00278022	OK	NOTCH3	0.277212	0.450833	0.614887	0.538629	0.776159	OK	-0.660141	0.472422	-1.39735	0.162307	0.507724	OK
ENSG00000074201.9	462	483	443	486	291	302	365	283	397	457	244	385	401	381	471	352	311	330	-0.102243	0.467099	OK	0.0338988	0.814307	OK	-0.194453	0.188721	OK	CLNS1A	-0.00824786	0.153743	-0.0536469	0.957216	0.983915	OK	-0.105159	0.155564	-0.675987	0.499049	0.812156	OK
ENSG00000074219.13	732	770	646	802	484	493	568	338	560	573	382	528	801	684	763	681	522	500	0.0967785	0.471622	OK	-0.100264	0.539803	OK	-0.132646	0.324385	OK	TEAD2	-0.398829	0.15836	-2.51849	0.0117858	0.0731373	OK	-0.0832696	0.151867	-0.548307	0.583481	0.861292	OK
ENSG00000074266.21	89	60	97	56	45	50	90	68	84	78	51	63	76	64	80	54	70	48	-0.44175	0.15912	OK	-0.555548	0.0436305	OK	-0.13338	0.65507	OK	EED	0.243484	0.30317	0.803128	0.421901	0.689906	OK	0.155482	0.327863	0.474231	0.635335	0.88703	OK
ENSG00000074319.13	594	605	636	696	423	450	501	355	560	613	356	543	614	538	719	553	485	476	0.0535639	0.694124	OK	0.0493458	0.710491	OK	0.112798	0.478109	OK	TSG101	-0.00667832	0.135785	-0.0491829	0.960774	0.984814	OK	0.162027	0.157998	1.0255	0.305126	0.667631	OK
ENSG00000074356.17	490	623	536	518	355	346	487	346	471	541	332	392	534	507	589	380	402	374	0.0985411	0.596501	OK	0.516987	0.0173215	OK	0.103529	0.464382	OK	NCBP3	0.0913902	0.221591	0.412428	0.680026	0.858158	OK	-0.139476	0.175696	-0.793845	0.427286	0.763614	OK
ENSG00000074416.14	1580	1202	1291	1417	699	842	1531	791	1223	1734	744	997	1952	1295	1706	1490	925	1119	-0.362814	0.0258113	OK	-0.121156	0.47292	OK	-0.2191	0.186281	OK	MGLL	0.223051	0.160333	1.39118	0.164172	0.418927	OK	0.346923	0.170895	2.03004	0.042353	0.238472	OK
ENSG00000074527.12	717	843	757	627	466	511	591	491	816	590	362	545	416	565	681	359	313	379	-0.269683	0.0290807	OK	-0.339095	0.0163274	OK	-0.388088	0.0286132	OK	NTN4	-0.11046	0.139792	-0.790173	0.429427	0.696846	OK	-0.604927	0.138994	-4.35219	1.34787e-05	0.000446159	OK
ENSG00000074582.14	85	97	64	77	52	55	67	68	78	83	49	53	79	72	77	59	58	50	-0.28766	0.33536	OK	-0.1119	0.737047	OK	-0.639188	0.0450741	OK	BCS1L	0.317286	0.33991	0.933443	0.350592	0.63005	OK	-0.291465	0.322861	-0.902757	0.366655	0.720369	OK
ENSG00000074590.13	567	742	677	759	568	540	959	810	1266	1302	850	1162	782	850	1170	786	923	867	0.0774249	0.49285	OK	-0.184817	0.0890797	OK	0.0198066	0.900147	OK	NUAK1	0.650741	0.11755	5.53587	3.09683e-08	1.28582e-06	OK	0.334332	0.147798	2.26209	0.0236916	0.164728	OK
ENSG00000074603.19	571	646	603	552	358	359	518	344	591	541	277	432	609	554	767	445	351	364	-0.121704	0.338201	OK	-0.0460367	0.728497	OK	-0.584656	2.40677e-05	OK	DPP8	0.0863346	0.139597	0.618456	0.536275	0.775142	OK	-0.219502	0.139714	-1.57108	0.116164	0.426283	OK
ENSG00000074621.14	146	157	121	176	99	111	90	71	135	140	84	151	148	130	149	127	110	96	0.111617	0.654596	OK	0.48162	0.0740179	OK	-0.0127301	0.963465	OK	SLC24A1	-0.322509	0.231302	-1.39432	0.163222	0.41732	OK	-0.548596	0.258819	-2.11962	0.0340384	0.207911	OK
ENSG00000074657.13	967	984	926	1335	856	886	988	699	1078	1660	856	1220	1196	1034	1305	1267	1194	1268	0.357941	0.00066379	OK	0.2305	0.0219329	OK	0.185515	0.136775	OK	ZNF532	0.219725	0.106254	2.06792	0.0386474	0.169221	OK	0.176266	0.120921	1.4577	0.144923	0.480009	OK
ENSG00000074695.6	2654	3483	3794	2823	2082	2101	2690	2549	4216	3336	1930	3083	3751	3890	5316	3034	2510	3117	-0.199666	0.143127	OK	-0.209086	0.0908671	OK	-0.328953	0.0128537	OK	LMAN1	0.248025	0.118618	2.09095	0.0365324	0.162941	OK	0.337111	0.130095	2.59126	0.00956239	0.0887839	OK
ENSG00000074696.13	1247	1352	1277	1250	689	742	1152	737	1232	1242	611	957	1290	1077	1377	1110	716	782	-0.296705	0.00607625	OK	-0.224629	0.0467139	OK	-0.310998	0.0225391	OK	HACD3	0.0381565	0.125622	0.303741	0.761326	0.901401	OK	-0.019124	0.150343	-0.127203	0.89878	0.974591	OK
ENSG00000074706.13	27	11	9	48	31	16	20	19	20	45	20	26	19	13	12	26	20	26	0.780118	0.246282	OK	0.784411	0.145443	OK	0.784473	0.280605	OK	IPCEF1	0.114493	0.524198	0.218416	0.827105	0.931891	OK	-0.0625387	0.583989	-0.107089	0.914719	0.977454	OK
ENSG00000074755.15	572	582	576	489	358	392	484	351	543	536	288	413	577	493	674	366	356	383	-0.157133	0.337913	OK	-0.212351	0.247121	OK	-0.204612	0.150497	OK	ZZEF1	-0.120948	0.207786	-0.582081	0.560512	0.790894	OK	0.0543228	0.180978	0.300162	0.764054	0.933471	OK
ENSG00000074800.16	13507	20382	20886	15010	13980	16072	15248	14391	24150	18422	13828	21038	20234	22352	29081	17689	19725	22105	0.0251365	0.885576	OK	-0.066646	0.657772	OK	-0.0202467	0.886509	OK	ENO1	0.14824	0.168932	0.877515	0.380207	0.656817	OK	0.352505	0.173642	2.03007	0.0423496	0.238472	OK
ENSG00000074842.7	1210	1481	1446	1271	948	1150	1207	915	1716	1503	961	1579	1670	1915	2408	1634	1668	1896	-0.00186053	0.988551	OK	0.0123706	0.930967	OK	0.0204051	0.881806	OK	MYDGF	0.158068	0.146377	1.07986	0.280203	0.558379	OK	0.566728	0.144548	3.9207	8.82925e-05	0.00218685	OK
ENSG00000074855.11	174	201	190	231	141	151	131	99	132	158	104	149	174	159	173	206	171	166	0.0908813	0.612945	OK	0.0540187	0.801591	OK	0.222872	0.239901	OK	ANO8	-0.391884	0.201901	-1.94097	0.052262	0.20595	OK	0.02964	0.186344	0.159061	0.873621	0.967521	OK
ENSG00000074935.14	77	94	76	109	71	84	41	43	85	61	37	59	76	75	126	56	70	73	0.183662	0.493043	OK	0.066326	0.849674	OK	-0.0663959	0.850276	OK	TUBE1	-0.567988	0.299168	-1.89856	0.0576221	0.219387	OK	-0.176598	0.305477	-0.578104	0.563194	0.848232	OK
ENSG00000074964.17	296	351	332	318	238	193	224	130	249	300	153	215	342	271	316	328	227	245	-0.107989	0.539642	OK	0.0442464	0.814015	OK	-0.0381638	0.839682	OK	ARHGEF10L	-0.314604	0.18804	-1.67307	0.0943136	0.302027	OK	0.0441129	0.191109	0.230826	0.81745	0.951104	OK
ENSG00000075089.9	98	112	104	97	67	81	71	55	112	123	59	70	77	76	81	93	71	72	-0.275497	0.246598	OK	-0.0910283	0.757202	OK	0.0585381	0.852208	OK	ACTR6	0.2169	0.277842	0.780659	0.435003	0.700969	OK	0.116772	0.287859	0.405656	0.684995	0.904495	OK
ENSG00000075131.10	39	34	55	21	31	22	41	23	53	56	27	33	33	28	49	41	33	24	-0.315232	0.443398	OK	0.0120395	0.975904	OK	0.0502647	0.904458	OK	TIPIN	0.715631	0.413776	1.72951	0.0837171	0.278887	OK	0.333083	0.432349	0.770403	0.441061	0.772505	OK
ENSG00000075142.13	481	539	495	441	320	306	409	280	437	440	283	401	473	428	509	372	321	304	-0.08423	0.531341	OK	-0.0281106	0.845829	OK	0.0583172	0.678851	OK	SRI	-0.0627375	0.150651	-0.416442	0.677086	0.857317	OK	0.0127281	0.152682	0.0833633	0.933563	0.983588	OK
ENSG00000075151.20	1827	1970	1732	2017	1298	1315	1499	1071	1642	1909	1062	1531	1846	1622	2049	1551	1269	1368	0.0142438	0.885403	OK	0.0223175	0.816068	OK	-0.16239	0.111135	OK	EIF4G3	-0.124586	0.101123	-1.23202	0.21794	0.487927	OK	-0.180412	0.109108	-1.65352	0.0982246	0.38748	OK
ENSG00000075188.9	109	113	88	87	59	65	78	55	101	88	61	84	86	89	93	71	71	71	-0.210655	0.476507	OK	-0.128466	0.635677	OK	-0.223677	0.389802	OK	NUP37	0.00727918	0.306521	0.0237478	0.981054	0.992858	OK	-0.206473	0.306726	-0.673151	0.500851	0.813226	OK
ENSG00000075213.11	457	502	515	527	314	327	382	253	335	441	209	250	389	369	475	318	240	252	0.0544335	0.673436	OK	-0.393543	0.0662695	OK	-0.662712	2.37581e-05	OK	SEMA3A	-0.40059	0.168937	-2.37124	0.0177284	0.0987915	OK	-0.570232	0.14926	-3.82039	0.000133243	0.00313002	OK
ENSG00000075218.19	101	75	61	75	48	47	110	57	111	140	66	97	38	47	61	26	29	50	-0.388738	0.263179	OK	-0.0669056	0.799076	OK	-0.319455	0.436817	OK	GTSE1	0.821111	0.264727	3.10173	0.00192395	0.018744	OK	-0.727584	0.378778	-1.92087	0.0547478	0.278045	OK
ENSG00000075223.14	7202	9669	8718	7229	5322	5203	3618	3591	6186	4118	2649	4330	6705	6545	8050	5283	4270	4618	-0.314292	0.0016585	OK	-0.333098	0.0250214	OK	-0.357507	0.000103016	OK	SEMA3C	-0.672449	0.11567	-5.8135	6.11797e-09	2.85548e-07	OK	-0.252416	0.0939954	-2.68541	0.00724414	0.072503	OK
ENSG00000075234.17	196	196	160	147	98	72	153	101	149	155	79	143	135	130	145	93	100	94	-0.575075	0.0150717	OK	0.190191	0.465952	OK	-0.0345062	0.885742	OK	TTC38	0.573799	0.285722	2.00824	0.0446176	0.185196	OK	0.10922	0.283452	0.385323	0.699998	0.909882	OK
ENSG00000075239.14	427	384	329	419	247	236	282	175	243	322	161	232	375	248	315	241	213	205	-0.181796	0.315026	OK	-0.00579506	0.974923	OK	-0.0111466	0.952854	OK	ACAT1	-0.192848	0.169819	-1.13561	0.256121	0.530543	OK	-0.219235	0.176788	-1.2401	0.214938	0.571368	OK
ENSG00000075240.17	197	240	225	291	174	208	163	119	176	229	117	182	244	199	284	218	180	215	0.27457	0.105576	OK	0.0927015	0.722705	OK	0.166298	0.473609	OK	GRAMD4	-0.644926	0.197835	-3.25992	0.00111442	0.012254	OK	-0.0730086	0.203642	-0.358514	0.719958	0.915766	OK
ENSG00000075275.16	2943	2924	2810	2970	1694	1921	2657	1905	2897	3122	1535	2392	3519	3140	3393	2798	1907	2122	-0.222848	0.0183839	OK	-0.097379	0.390277	OK	-0.367261	0.00256271	OK	CELSR1	0.219364	0.125976	1.74132	0.0816279	0.274358	OK	0.112965	0.125873	0.897452	0.369478	0.722465	OK
ENSG00000075292.19	855	961	871	860	581	532	690	468	782	667	384	588	793	707	906	583	494	509	-0.299671	0.0232609	OK	-0.166835	0.208028	OK	-0.408231	0.0067617	OK	ZNF638	-0.10898	0.15157	-0.719011	0.472134	0.72937	OK	-0.0608279	0.163231	-0.372649	0.70941	0.913121	OK
ENSG00000075303.13	71	84	65	133	71	77	70	50	105	116	45	80	79	64	95	83	67	70	0.209435	0.435687	OK	-0.0759672	0.835951	OK	0.145053	0.605281	OK	SLC25A40	-0.0761933	0.318351	-0.239337	0.810844	0.924441	OK	-0.236258	0.278376	-0.848699	0.396049	0.741323	OK
ENSG00000075336.12	109	116	159	108	87	83	121	105	146	135	96	150	138	106	168	111	81	103	-0.381768	0.120316	OK	0.0247597	0.921141	OK	-0.0701631	0.771217	OK	TIMM21	0.59203	0.244083	2.42553	0.015286	0.0893435	OK	0.433758	0.250907	1.72876	0.0838523	0.35305	OK
ENSG00000075340.23	115	105	83	101	70	73	93	69	93	125	76	101	111	103	120	92	64	62	-0.00327542	0.989391	OK	-0.219728	0.506074	OK	-1.16985	4.75754e-05	OK	ADD2	0.563626	0.270491	2.08371	0.0371861	0.164574	OK	-0.0355983	0.273953	-0.129943	0.896611	0.974469	OK
ENSG00000075391.16	970	970	953	1405	1004	974	826	529	908	1052	607	815	856	844	1179	889	801	867	0.775347	6.07428e-13	OK	0.450477	0.000536171	OK	0.453529	0.000312699	OK	RASAL2	-0.427443	0.133014	-3.21352	0.00131119	0.0138954	OK	-0.286463	0.119581	-2.39555	0.0165955	0.128263	OK
ENSG00000075399.14	313	344	308	285	215	216	274	195	253	290	171	237	307	300	348	247	204	216	-0.00320052	0.9835	OK	-0.273523	0.110792	OK	-0.425352	0.0116619	OK	VPS9D1	-0.334772	0.170858	-1.95936	0.0500707	0.200496	OK	-0.35102	0.17357	-2.02235	0.0431403	0.241438	OK
ENSG00000075407.18	260	277	258	346	219	220	250	177	264	357	198	246	247	192	267	231	190	197	0.105274	0.587582	OK	0.16565	0.325875	OK	0.181791	0.346684	OK	ZNF37A	0.0722068	0.177424	0.406972	0.684029	0.860277	OK	-0.22717	0.193126	-1.17628	0.239482	0.601134	OK
ENSG00000075413.18	644	676	715	954	735	692	484	391	563	643	473	633	685	682	847	708	692	666	0.430096	0.000744154	OK	0.234464	0.116502	OK	0.353021	0.0293814	OK	MARK3	-0.390051	0.151062	-2.58207	0.00982108	0.0645221	OK	0.00191128	0.157072	0.0121682	0.990291	0.998288	OK
ENSG00000075415.12	4714	4450	3863	4660	2703	2799	4209	2751	4026	5320	2595	3501	4641	3646	4322	4383	3070	3112	-0.086306	0.438634	OK	-0.0355299	0.76837	OK	0.0257423	0.847459	OK	SLC25A3	0.142175	0.120908	1.1759	0.239635	0.513435	OK	0.113362	0.136856	0.828333	0.407482	0.749157	OK
ENSG00000075420.13	3804	4500	4421	4722	3733	3620	4071	3199	5198	5203	3078	4522	4550	4383	5703	3926	4023	3935	0.150611	0.162086	OK	0.00648503	0.942946	OK	-0.0335316	0.754696	OK	FNDC3B	0.00708765	0.1111	0.0637952	0.949133	0.980418	OK	0.00685553	0.119259	0.0574843	0.954159	0.988158	OK
ENSG00000075426.12	3773	3286	3976	16868	13936	16408	4066	2455	4004	8534	5617	9553	3277	2465	3591	9261	10302	11329	2.3855	6.89045e-64	OK	1.12164	2.98148e-18	OK	1.96152	5.0512e-50	OK	FOSL2	-1.0683	0.153239	-6.97146	3.13661e-12	2.35909e-10	OK	-0.641501	0.158405	-4.04976	5.12703e-05	0.00142141	OK
ENSG00000075539.14	703	762	734	824	608	563	642	506	754	822	460	618	737	618	894	593	601	525	0.308395	0.0407998	OK	0.0215986	0.8762	OK	0.179203	0.228596	OK	FRYL	-0.167128	0.140045	-1.19339	0.232718	0.506287	OK	-0.294069	0.159124	-1.84805	0.064595	0.304604	OK
ENSG00000075568.17	1099	1280	1115	1383	822	795	976	674	1047	1113	651	900	1118	1035	1351	902	725	844	-0.0532353	0.61279	OK	-0.147386	0.1921	OK	-0.246757	0.0255295	OK	TMEM131	-0.188022	0.114846	-1.63716	0.101597	0.316593	OK	-0.18976	0.12405	-1.52971	0.126088	0.445608	OK
ENSG00000075618.18	7060	6710	6426	4998	3461	3681	7317	4951	7084	6754	3684	5159	7307	6415	7142	5697	4178	4682	-0.491913	2.19068e-08	OK	-0.445807	9.78108e-08	OK	-0.339269	0.00181619	OK	FSCN1	0.264629	0.089117	2.96945	0.00298333	0.0262653	OK	0.226306	0.109304	2.07042	0.0384131	0.222993	OK
ENSG00000075624.16	109116	103588	98702	93581	57340	58321	102118	77789	116684	108578	60219	83843	117959	99381	122865	90579	70364	69226	-0.335965	0.000117491	OK	-0.328371	1.32107e-05	OK	-0.349882	0.000362092	OK	ACTB	0.211045	0.0873061	2.4173	0.015636	0.0907411	OK	0.135921	0.104827	1.29663	0.19476	0.547482	OK
ENSG00000075651.16	113	156	139	182	136	111	69	68	74	97	54	103	74	93	130	93	87	80	0.544776	0.0174304	OK	0.42255	0.190943	OK	0.431932	0.282523	OK	PLD1	-0.554309	0.301986	-1.83555	0.0664245	0.239814	OK	-0.158462	0.329943	-0.480272	0.631034	0.884568	OK
ENSG00000075702.18	29	34	47	48	29	22	58	34	46	92	35	46	21	27	42	23	12	35	0.00569194	0.988715	OK	0.122438	0.726058	OK	-0.06091	0.901388	OK	WDR62	0.666815	0.37788	1.76462	0.0776274	0.264839	OK	-0.40723	0.470537	-0.865459	0.386787	0.733678	OK
ENSG00000075711.21	3733	4083	4153	4893	3466	3500	2350	1879	3222	3677	1959	2992	3141	2871	4361	2983	2638	3142	0.341995	0.00375534	OK	0.138745	0.158629	OK	0.0307874	0.789826	OK	DLG1	-0.523238	0.102416	-5.10897	3.23925e-07	1.09041e-05	OK	-0.543738	0.106786	-5.09184	3.54602e-07	1.84098e-05	OK
ENSG00000075785.12	2404	2499	2425	3243	2215	2286	1856	1374	2208	2748	1554	2474	2569	2212	3084	2723	2228	2738	0.370968	1.14916e-05	OK	0.239357	0.0149179	OK	0.231908	0.0330113	OK	RAB7A	-0.271229	0.103869	-2.61127	0.00902079	0.060454	OK	0.000657439	0.113259	0.00580472	0.995369	0.99845	OK
ENSG00000075790.10	605	729	759	646	428	498	473	294	575	513	287	461	654	599	800	557	470	567	-0.0734318	0.566332	OK	-0.0978464	0.488933	OK	0.152863	0.263108	OK	BCAP29	-0.220587	0.14649	-1.50582	0.132114	0.370686	OK	0.265399	0.15869	1.67244	0.0944374	0.378211	OK
ENSG00000075826.17	280	380	277	279	189	243	192	149	223	181	105	186	271	262	369	193	190	186	-0.172076	0.332021	OK	-0.314092	0.200636	OK	-0.658752	0.000152924	OK	SEC31B	-0.489814	0.221138	-2.21497	0.0267619	0.131335	OK	-0.497509	0.175389	-2.8366	0.00455968	0.0519272	OK
ENSG00000075856.12	491	504	433	348	249	283	328	228	357	353	196	259	388	363	470	307	246	279	-0.429342	0.0103583	OK	-0.284124	0.0667372	OK	-0.335055	0.0215634	OK	SART3	-0.249365	0.16888	-1.47658	0.139788	0.383087	OK	-0.12378	0.170215	-0.7272	0.467104	0.791854	OK
ENSG00000075914.13	164	160	130	128	78	75	120	79	117	121	84	97	145	126	138	115	86	96	-0.401931	0.0684159	OK	-0.179241	0.445427	OK	-0.234872	0.296171	OK	EXOSC7	0.0456263	0.242276	0.188323	0.850623	0.941978	OK	0.0910553	0.245279	0.371232	0.710465	0.913384	OK
ENSG00000075945.13	277	314	253	291	135	190	222	178	308	285	173	229	323	265	350	220	172	190	-0.199521	0.281206	OK	0.0789335	0.653746	OK	-0.458948	0.00482384	OK	KIFAP3	0.337821	0.199611	1.69239	0.0905707	0.294126	OK	-0.0637007	0.20213	-0.315148	0.75265	0.928942	OK
ENSG00000075975.16	393	423	405	657	423	447	311	228	366	589	362	526	389	369	474	534	498	432	0.559584	9.79463e-06	OK	0.613416	1.49866e-05	OK	0.492104	0.00049883	OK	MKRN2	-0.0975542	0.135056	-0.722323	0.470096	0.727588	OK	-0.0689607	0.139295	-0.495069	0.620551	0.880768	OK
ENSG00000076003.5	264	276	332	223	178	165	264	143	311	289	138	213	225	181	285	174	137	180	-0.313181	0.0793546	OK	-0.221321	0.252586	OK	-0.246001	0.205438	OK	MCM6	0.0620217	0.182581	0.339695	0.734086	0.888464	OK	-0.244501	0.196834	-1.24217	0.214175	0.571264	OK
ENSG00000076043.10	665	677	627	681	410	456	668	461	680	818	406	555	730	693	816	614	519	565	-0.0749873	0.529593	OK	-0.134234	0.30063	OK	-0.154336	0.196717	OK	REXO2	0.135734	0.137185	0.989427	0.322454	0.603461	OK	0.16554	0.132729	1.2472	0.212323	0.569613	OK
ENSG00000076053.10	240	318	313	719	608	543	253	189	316	560	402	497	303	270	326	507	570	434	1.55537	1.84186e-24	OK	1.07158	6.38754e-10	OK	1.161	2.17879e-10	OK	RBM7	-0.26105	0.150844	-1.73059	0.0835243	0.278457	OK	-0.117657	0.179054	-0.657103	0.511115	0.81788	OK
ENSG00000076067.13	979	1048	972	1002	649	679	843	565	951	1040	529	738	916	841	1261	814	639	649	0.22111	0.0482054	OK	0.0284606	0.831403	OK	-0.0895988	0.487171	OK	RBMS2	-0.0911293	0.1333	-0.683643	0.494201	0.746608	OK	-0.0148133	0.138244	-0.107154	0.914667	0.977454	OK
ENSG00000076108.11	1074	1136	1039	1324	735	698	1058	642	1074	1525	722	1030	1331	1030	1321	1161	855	846	-0.15022	0.328036	OK	0.0571343	0.722431	OK	-0.262746	0.0571964	OK	BAZ2A	0.0951839	0.183189	0.519595	0.603346	0.818263	OK	0.170975	0.176018	0.971348	0.331375	0.691776	OK
ENSG00000076201.15	889	953	801	788	473	512	875	561	876	932	517	689	967	817	1014	720	507	564	-0.262648	0.0194729	OK	-0.186071	0.167938	OK	-0.41015	0.00144736	OK	PTPN23	0.193877	0.127495	1.52067	0.128344	0.364065	OK	-0.0444306	0.139459	-0.318593	0.750035	0.927788	OK
ENSG00000076242.14	272	270	259	304	158	162	267	200	312	339	170	232	262	243	281	231	181	190	0.204907	0.309701	OK	0.272723	0.163119	OK	-0.0568711	0.779936	OK	MLH1	0.232515	0.232082	1.00187	0.316408	0.596215	OK	-0.213124	0.228449	-0.932917	0.350863	0.708918	OK
ENSG00000076248.10	214	222	224	217	139	141	207	140	214	224	105	154	163	147	200	132	150	153	-0.253879	0.139588	OK	-0.313838	0.0996278	OK	-0.0366376	0.859265	OK	UNG	-0.105947	0.197304	-0.536975	0.591285	0.811377	OK	-0.180392	0.208394	-0.86563	0.386693	0.733678	OK
ENSG00000076321.11	255	254	261	203	143	111	199	146	207	201	122	156	256	257	307	190	145	137	-0.522619	0.00629036	OK	-0.248967	0.185919	OK	-0.693118	0.000336764	OK	KLHL20	0.0320547	0.214597	0.149372	0.88126	0.956158	OK	0.0368559	0.232554	0.158483	0.874076	0.967521	OK
ENSG00000076344.16	86	82	69	97	44	75	100	54	71	115	78	92	111	71	83	97	82	72	-0.261327	0.392507	OK	0.333292	0.243599	OK	0.0835293	0.773481	OK	RGS11	0.367146	0.27049	1.35733	0.174675	0.431022	OK	0.238941	0.28501	0.838362	0.401827	0.745211	OK
ENSG00000076351.13	61	77	61	75	39	61	97	90	124	116	81	118	91	73	103	90	83	77	-0.314253	0.334073	OK	-0.344975	0.207903	OK	0.249663	0.483014	OK	SLC46A1	0.474396	0.309199	1.53427	0.124962	0.358728	OK	0.560141	0.380025	1.47396	0.140494	0.472546	OK
ENSG00000076356.7	357	437	489	307	262	296	387	262	446	354	222	327	522	522	587	255	266	288	-0.445453	0.0145556	OK	-0.392713	0.0281697	OK	-0.663387	0.00101651	OK	PLXNA2	0.1007	0.170524	0.59053	0.554835	0.786679	OK	0.105085	0.221781	0.473825	0.635625	0.887111	OK
ENSG00000076382.17	136	101	96	146	80	95	230	114	150	264	120	163	63	63	101	61	77	86	0.121821	0.634735	OK	0.146179	0.56052	OK	0.316032	0.3421	OK	SPAG5	0.742396	0.242449	3.06207	0.00219814	0.0205922	OK	-0.524612	0.302068	-1.73673	0.082434	0.349465	OK
ENSG00000076513.17	710	732	617	758	486	478	530	374	530	717	381	536	476	423	561	506	412	400	0.064172	0.664107	OK	0.318092	0.013173	OK	0.234229	0.0823506	OK	ANKRD13A	-0.0731327	0.134252	-0.544743	0.585931	0.807372	OK	-0.326663	0.139396	-2.34341	0.0191083	0.142314	OK
ENSG00000076554.15	10	25	24	14	11	9	19	20	26	13	27	31	24	25	21	17	19	20	-1.86223	0.00416536	OK	-0.173999	0.736576	OK	0.17327	0.754109	OK	TPD52	1.69905	0.559236	3.03816	0.00238024	0.0218623	OK	1.65807	0.58023	2.85761	0.0042685	0.0492965	OK
ENSG00000076555.15	41	40	34	58	42	44	29	19	42	54	22	36	38	27	32	25	28	17	0.36824	0.363731	OK	-0.351405	0.539958	OK	-0.266343	0.584603	OK	ACACB	-0.388909	0.41243	-0.94297	0.345696	0.625657	OK	-0.897944	0.424386	-2.11587	0.0343562	0.208757	OK
ENSG00000076604.15	412	369	358	1075	819	866	551	361	455	1163	781	984	402	318	342	1154	1070	955	1.75862	5.97367e-34	OK	1.1412	2.45767e-11	OK	1.96282	1.37238e-32	OK	TRAF4	0.0571855	0.162813	0.351234	0.725413	0.883327	OK	0.177714	0.132044	1.34587	0.178344	0.528495	OK
ENSG00000076641.4	90	76	78	166	111	115	96	57	76	129	57	115	107	88	96	122	94	107	1.25747	8.49321e-06	OK	0.0203299	0.951491	OK	0.257669	0.264833	OK	PAG1	-0.763954	0.284227	-2.68783	0.00719181	0.0514186	OK	-0.564939	0.27327	-2.06733	0.0387029	0.223586	OK
ENSG00000076650.7	78	88	54	72	37	38	46	44	78	91	52	55	62	80	95	66	93	70	0.363402	0.402758	OK	0.124238	0.689919	OK	0.211132	0.477127	OK	GPATCH1	-0.28911	0.431008	-0.670776	0.502363	0.752699	OK	-0.00889915	0.434905	-0.0204623	0.983675	0.996708	OK
ENSG00000076662.10	18	45	37	32	24	29	45	25	41	39	32	37	26	26	42	33	38	31	0.0581376	0.898921	OK	-0.206429	0.61505	OK	0.345443	0.424098	OK	ICAM3	0.240787	0.427333	0.563465	0.573118	0.798495	OK	0.263736	0.43799	0.602151	0.547074	0.842498	OK
ENSG00000076685.18	1421	1543	1448	2057	1347	1314	1204	855	1345	1864	1025	1339	1637	1362	1856	1807	1493	1446	0.170213	0.130154	OK	0.210216	0.0935454	OK	0.0515593	0.617646	OK	NT5C2	-0.134646	0.134702	-0.999578	0.317515	0.597103	OK	-0.0242066	0.12055	-0.200801	0.840855	0.957424	OK
ENSG00000076706.17	69	38	34	92	36	19	376	140	154	399	129	135	58	40	27	49	31	18	0.675338	0.187239	OK	-0.00353612	0.9917	OK	0.0850035	0.860483	OK	MCAM	1.74542	0.683538	2.55351	0.0106642	0.0685183	OK	-0.583481	0.530182	-1.10053	0.271101	0.632222	OK
ENSG00000076826.9	13	21	13	11	13	12	10	13	13	15	9	12	12	17	13	13	14	17	-0.134032	0.824092	OK	-1.16112	0.139398	OK	0.175381	0.767232	OK	CAMSAP3	0.0918349	0.638707	0.143783	0.885672	0.958495	OK	0.262027	0.609664	0.429789	0.667349	0.898692	OK
ENSG00000076924.12	370	405	391	327	233	287	314	210	315	337	186	254	364	290	427	289	232	278	-0.121082	0.495266	OK	-0.253838	0.147119	OK	-0.16446	0.32713	OK	XAB2	-0.268393	0.194713	-1.3784	0.16808	0.423943	OK	-0.129111	0.204311	-0.631934	0.52743	0.827776	OK
ENSG00000076928.17	845	782	777	745	528	574	656	464	677	740	420	589	796	748	1019	725	650	678	-0.153381	0.248167	OK	-0.11055	0.384122	OK	-0.255004	0.0340171	OK	ARHGEF1	-0.0837793	0.134675	-0.622087	0.533885	0.774084	OK	0.0939945	0.129952	0.723304	0.469493	0.793731	OK
ENSG00000076984.17	346	449	354	353	225	257	308	218	334	347	215	287	331	324	423	298	282	303	-0.257956	0.104205	OK	-0.0813214	0.606237	OK	-0.105072	0.505758	OK	MAP2K7	0.0430593	0.162268	0.265359	0.790733	0.915327	OK	0.11862	0.164072	0.722978	0.469693	0.793731	OK
ENSG00000077044.10	331	348	282	294	229	217	354	199	321	338	177	242	272	259	269	191	199	203	-0.470753	0.004776	OK	-0.693169	0.0103466	OK	-0.33455	0.142827	OK	DGKD	0.0135391	0.169796	0.0797374	0.936446	0.976587	OK	-0.161718	0.218944	-0.738629	0.460132	0.786987	OK
ENSG00000077063.11	20	13	24	28	19	18	16	10	19	21	6	17	8	6	15	15	7	19	0.430486	0.39557	OK	0.49118	0.448465	OK	0.973526	0.202097	OK	CTTNBP2	0.0738156	0.592266	0.124633	0.900814	0.96522	OK	0.10603	0.602653	0.175938	0.860342	0.964042	OK
ENSG00000077092.19	583	711	671	905	696	760	362	358	544	801	658	869	556	545	784	747	800	749	0.617928	1.04766e-05	OK	0.751706	2.28713e-05	OK	0.447274	0.00164996	OK	RARB	-0.152432	0.169032	-0.901791	0.367168	0.645129	OK	-0.0444156	0.146859	-0.302437	0.762319	0.932676	OK
ENSG00000077097.15	1715	1855	1607	1670	855	904	1217	972	1495	1475	710	1070	1582	1259	1733	1110	879	926	-0.437955	0.00176144	OK	-0.20528	0.0928466	OK	-0.384318	0.000957954	OK	TOP2B	-0.0247062	0.158158	-0.156212	0.875866	0.953744	OK	-0.0989112	0.162483	-0.608749	0.542691	0.83956	OK
ENSG00000077147.16	3790	4251	4545	4183	2824	2948	3310	2732	4291	4096	2340	3524	4429	3945	5409	4067	3232	3530	-0.0832837	0.400863	OK	-0.254459	0.00231993	OK	-0.179207	0.0472199	OK	TM9SF3	-0.119367	0.0994089	-1.20076	0.229843	0.503226	OK	0.162981	0.102105	1.59621	0.110441	0.41378	OK
ENSG00000077150.20	1333	1198	1070	2710	2100	1972	1092	724	1136	1478	858	1225	964	629	797	1093	782	794	1.46572	1.79026e-22	OK	0.42384	0.0020651	OK	0.674008	0.0046841	OK	NFKB2	-1.09217	0.144607	-7.55268	4.26383e-14	3.87038e-12	OK	-1.32521	0.206921	-6.40443	1.50932e-10	1.44826e-08	OK
ENSG00000077152.11	50	43	37	77	27	41	78	34	70	90	55	63	35	34	43	32	39	48	0.373314	0.31102	OK	0.187261	0.546096	OK	0.355046	0.347063	OK	UBE2T	0.538769	0.331554	1.62498	0.104166	0.321462	OK	-0.2034	0.389352	-0.522406	0.601387	0.87153	OK
ENSG00000077157.22	189	230	220	246	184	247	284	189	329	357	236	329	193	172	262	241	173	214	0.449784	0.06892	OK	0.428941	0.143435	OK	-0.0747101	0.809051	OK	PPP1R12B	0.774519	0.25555	3.03079	0.00243917	0.0222792	OK	-0.0871327	0.280394	-0.310751	0.75599	0.930384	OK
ENSG00000077232.18	2229	2383	2355	2018	1217	1338	1822	1385	2393	2000	1051	1700	2720	2369	3026	2031	1513	1635	-0.325013	0.000198665	OK	-0.210848	0.078383	OK	-0.336872	0.0320792	OK	DNAJC10	-0.0142216	0.123014	-0.11561	0.907962	0.966563	OK	0.154825	0.150804	1.02667	0.304578	0.667069	OK
ENSG00000077235.18	1472	1528	1456	1105	676	581	1354	900	1346	1111	625	815	1333	1132	1556	739	579	560	-0.665162	0.000181363	OK	-0.796795	8.30782e-06	OK	-0.515768	0.000245487	OK	GTF3C1	-0.0910773	0.148148	-0.614773	0.538705	0.776159	OK	0.221004	0.164773	1.34127	0.179834	0.52996	OK
ENSG00000077238.14	413	430	406	511	383	350	380	237	308	397	213	310	354	298	394	327	280	286	0.226552	0.118444	OK	-0.146071	0.433528	OK	0.0365387	0.816067	OK	IL4R	-0.476034	0.155012	-3.07094	0.00213386	0.0201912	OK	-0.306188	0.164173	-1.86504	0.062176	0.298317	OK
ENSG00000077254.14	571	682	547	715	399	367	513	362	533	575	302	408	490	494	631	439	404	369	-0.03669	0.769753	OK	-0.185881	0.200094	OK	-0.178864	0.2841	OK	USP33	-0.141568	0.142006	-0.996916	0.318805	0.598846	OK	-0.181347	0.157651	-1.15031	0.250018	0.611196	OK
ENSG00000077264.15	109	129	119	133	81	83	89	58	89	91	68	86	103	87	95	91	81	82	0.343322	0.132793	OK	0.0969455	0.758472	OK	-0.372969	0.188201	OK	PAK3	-0.253554	0.298373	-0.849789	0.395442	0.669601	OK	-0.616362	0.286362	-2.15239	0.0313666	0.198433	OK
ENSG00000077312.9	298	308	227	437	266	221	308	210	331	475	280	400	244	180	251	283	245	252	0.365392	0.0483961	OK	0.180158	0.260972	OK	0.431132	0.00985861	OK	SNRPA	0.297471	0.164684	1.80631	0.0708699	0.250346	OK	-0.226885	0.175818	-1.29045	0.196894	0.550764	OK
ENSG00000077348.9	39	29	46	33	23	29	45	28	49	55	37	43	37	36	35	33	22	37	-0.162084	0.690045	OK	0.0756948	0.828042	OK	-0.0191403	0.962459	OK	EXOSC5	0.597838	0.37728	1.5846	0.113057	0.338349	OK	0.113616	0.428843	0.264936	0.791059	0.942672	OK
ENSG00000077380.15	1383	1413	1343	1459	844	897	1069	812	1228	1177	719	975	1388	1184	1459	1109	935	967	-0.134479	0.176067	OK	-0.163112	0.122131	OK	-0.174946	0.0865602	OK	DYNC1I2	-0.134821	0.11497	-1.17267	0.24093	0.514876	OK	-0.0287759	0.114562	-0.251182	0.801674	0.947124	OK
ENSG00000077420.16	60	68	81	81	42	69	91	70	90	127	65	62	102	94	119	88	81	107	0.160997	0.596521	OK	-0.0792572	0.777084	OK	0.0535909	0.838401	OK	APBB1IP	0.365688	0.308276	1.18624	0.235529	0.509045	OK	0.564308	0.307966	1.83237	0.0668964	0.310215	OK
ENSG00000077454.16	412	393	331	348	256	228	383	256	425	475	289	392	354	328	410	307	300	265	-0.301746	0.0533355	OK	-0.116743	0.412562	OK	-0.116824	0.453997	OK	LRCH4	0.397114	0.153864	2.58095	0.00985301	0.0645843	OK	0.141157	0.161278	0.875242	0.381442	0.730122	OK
ENSG00000077458.13	36	63	52	97	83	67	49	41	75	112	88	110	52	67	90	104	118	116	0.756223	0.0526827	OK	0.740804	0.0212648	OK	1.16074	0.000148789	OK	FAM76B	0.506226	0.245527	2.0618	0.0392272	0.170876	OK	0.910325	0.287904	3.16191	0.0015674	0.0231345	OK
ENSG00000077463.15	191	176	147	160	128	139	175	114	163	170	97	151	170	138	186	171	169	158	0.0359941	0.865774	OK	-0.188036	0.383101	OK	0.268761	0.161109	OK	SIRT6	-0.0910899	0.220667	-0.412794	0.679758	0.858158	OK	0.173159	0.208595	0.830119	0.406472	0.749157	OK
ENSG00000077514.9	89	108	123	79	68	55	106	63	109	100	62	83	76	86	104	37	48	59	-0.234358	0.419751	OK	-0.39756	0.175102	OK	-0.934091	0.00724943	OK	POLD3	0.358094	0.309713	1.15621	0.247594	0.521874	OK	-0.436268	0.386265	-1.12945	0.258707	0.620967	OK
ENSG00000077549.18	2954	3082	2732	2909	1836	1943	3057	2250	3411	3734	2032	2954	3123	2743	3424	2710	2358	2409	-0.128959	0.129451	OK	-0.0967124	0.243232	OK	-0.0872289	0.322247	OK	CAPZB	0.323731	0.0931406	3.47572	0.000509481	0.0065168	OK	0.151505	0.0968339	1.56459	0.117679	0.428995	OK
ENSG00000077585.14	232	227	212	204	110	161	133	87	180	195	89	153	220	241	247	222	157	196	-0.322386	0.0964045	OK	-0.035544	0.877613	OK	-0.121593	0.512776	OK	GPR137B	-0.118981	0.227033	-0.524067	0.600232	0.816722	OK	0.29006	0.214029	1.35524	0.175342	0.524485	OK
ENSG00000077684.16	295	346	279	318	197	216	308	253	390	413	319	402	296	362	346	242	302	282	-0.0303313	0.850005	OK	0.140649	0.381277	OK	-0.0111613	0.955543	OK	JADE1	0.55823	0.17153	3.25442	0.00113623	0.0124521	OK	0.170182	0.196491	0.866106	0.386432	0.733678	OK
ENSG00000077713.19	167	165	181	204	121	138	174	134	184	210	120	168	207	170	245	223	152	184	0.202221	0.321522	OK	-0.0824257	0.661849	OK	0.082394	0.671185	OK	SLC25A43	0.0316117	0.206386	0.153168	0.878266	0.954752	OK	0.192823	0.216309	0.89142	0.372704	0.72516	OK
ENSG00000077721.16	758	721	697	767	432	494	663	489	728	828	438	590	794	644	841	672	593	526	-0.109101	0.359272	OK	-0.105873	0.392454	OK	-0.0654043	0.621341	OK	UBE2A	0.126375	0.133204	0.948736	0.342755	0.622643	OK	0.137593	0.138408	0.994112	0.320168	0.681419	OK
ENSG00000077782.20	1345	1360	1377	1251	730	920	970	713	1134	952	536	886	1321	1240	1628	1045	885	989	-0.281168	0.034962	OK	-0.47812	0.00207097	OK	-0.282491	0.0331073	OK	FGFR1	-0.453607	0.156523	-2.89802	0.0037553	0.0317044	OK	0.0370495	0.147572	0.251061	0.801767	0.947149	OK
ENSG00000078018.19	392	327	297	411	230	183	269	187	317	344	157	239	384	287	401	268	208	225	0.0350534	0.877466	OK	-0.260724	0.196624	OK	-0.270795	0.104346	OK	MAP2	-0.416263	0.244451	-1.70285	0.0885967	0.290149	OK	-0.169006	0.232494	-0.726926	0.467271	0.791854	OK
ENSG00000078043.16	192	222	236	270	204	204	199	158	273	264	209	247	229	238	293	252	253	250	0.481616	0.00547652	OK	0.425666	0.0352572	OK	0.579257	0.00212583	OK	PIAS2	0.1771	0.195654	0.90517	0.365375	0.643917	OK	0.242268	0.178468	1.35749	0.174626	0.524399	OK
ENSG00000078061.13	572	636	582	633	456	448	487	376	583	631	391	502	616	579	677	589	480	528	-0.015911	0.892484	OK	0.0498006	0.695048	OK	-0.0287089	0.817326	OK	ARAF	0.0403585	0.13012	0.310163	0.756437	0.900464	OK	0.102856	0.130877	0.785899	0.431927	0.766633	OK
ENSG00000078070.13	86	115	81	114	68	54	57	51	84	100	50	64	59	74	79	64	49	51	-0.00422918	0.987511	OK	-0.582756	0.138202	OK	-0.205467	0.499024	OK	MCCC1	-0.184151	0.286781	-0.642131	0.520788	0.765536	OK	-0.520433	0.295903	-1.7588	0.0786116	0.339184	OK
ENSG00000078098.14	2122	2643	2584	2055	1562	1747	1601	1404	2521	1762	1246	1998	2923	3003	3845	2495	2104	2559	-0.178831	0.139337	OK	-0.108967	0.492832	OK	-0.0695795	0.518919	OK	FAP	-0.06356	0.156123	-0.407115	0.683924	0.860264	OK	0.510722	0.130735	3.90655	9.36225e-05	0.00229813	OK
ENSG00000078124.12	298	294	289	295	151	160	240	180	311	309	135	238	319	234	322	260	152	166	-0.136712	0.474442	OK	0.0833783	0.644131	OK	0.110215	0.554555	OK	ACER3	0.17559	0.214065	0.820268	0.412063	0.682984	OK	0.334242	0.215302	1.55243	0.120559	0.435821	OK
ENSG00000078140.14	773	873	880	678	433	500	725	538	966	856	435	605	818	712	966	680	474	575	-0.203074	0.188796	OK	-0.123742	0.422646	OK	0.234349	0.129943	OK	UBE2K	0.0862646	0.182847	0.471785	0.63708	0.8366	OK	0.449234	0.191341	2.34782	0.0188836	0.141349	OK
ENSG00000078142.13	381	483	466	470	342	376	360	285	469	455	271	333	392	404	577	357	357	271	0.376571	0.0124084	OK	0.302156	0.0671982	OK	-0.313579	0.114504	OK	PIK3C3	-0.145911	0.172113	-0.847764	0.39657	0.670688	OK	-0.642099	0.190823	-3.3649	0.000765718	0.0129677	OK
ENSG00000078177.14	118	156	140	194	102	91	119	89	145	145	65	105	120	103	137	151	78	86	-0.0192151	0.9343	OK	-0.359242	0.123312	OK	-0.0769926	0.754975	OK	N4BP2	-0.285808	0.242677	-1.17773	0.238904	0.512522	OK	-0.169439	0.258435	-0.655635	0.512059	0.818047	OK
ENSG00000078237.7	245	258	223	230	121	119	246	196	239	304	131	185	239	197	214	227	139	148	-0.739245	0.000679526	OK	-0.513779	0.0215296	OK	-0.297501	0.387325	OK	TIGAR	0.758283	0.239785	3.16235	0.00156502	0.0159557	OK	0.28004	0.366644	0.763793	0.444991	0.775962	OK
ENSG00000078246.17	548	612	572	921	578	624	323	318	476	669	440	682	555	538	735	813	793	854	0.516482	6.43951e-06	OK	0.546056	0.00114279	OK	0.639703	1.24832e-06	OK	TULP3	-0.28318	0.135281	-2.09327	0.0363249	0.162181	OK	0.225454	0.128785	1.75062	0.0800106	0.343378	OK
ENSG00000078269.15	1063	1421	1281	1207	1022	1065	941	629	1044	972	534	892	899	890	1144	685	583	773	0.311892	0.0430181	OK	-0.0646131	0.559389	OK	-0.263038	0.0620671	OK	SYNJ2	-0.527377	0.148847	-3.54307	0.000395492	0.00528684	OK	-0.884939	0.167298	-5.2896	1.22584e-07	7.23796e-06	OK
ENSG00000078304.19	878	980	934	1142	714	730	812	607	964	1176	696	913	888	776	974	908	789	810	0.162246	0.129537	OK	0.19569	0.0856442	OK	0.132084	0.225252	OK	PPP2R5C	0.165489	0.11621	1.42405	0.154432	0.406526	OK	-0.0056489	0.117266	-0.0481716	0.96158	0.990989	OK
ENSG00000078319.9	34	36	44	39	23	24	40	19	28	40	21	33	34	35	40	29	31	23	-0.167987	0.66726	OK	0.0203052	0.96193	OK	-0.178142	0.655848	OK	PMS2P1	0.0634108	0.406837	0.155863	0.876141	0.953792	OK	-0.0478589	0.421926	-0.11343	0.90969	0.976745	OK
ENSG00000078369.18	4942	5270	5009	4853	3276	3329	4734	3606	5655	5376	3063	4606	5212	4896	6281	4427	3773	4095	0.0477434	0.678347	OK	-0.0672032	0.524566	OK	-0.0271567	0.772306	OK	GNB1	0.164602	0.130839	1.25805	0.208373	0.47623	OK	0.119404	0.129835	0.919666	0.357748	0.71235	OK
ENSG00000078401.7	142	134	144	120	193	160	336	307	446	400	446	414	175	214	268	94	307	211	0.507868	0.0823932	OK	0.215825	0.330264	OK	0.173264	0.619014	OK	EDN1	1.3688	0.296481	4.61684	3.89634e-06	9.71281e-05	OK	0.339704	0.630425	0.538849	0.589991	0.865523	OK
ENSG00000078403.17	179	195	183	321	272	269	129	120	150	348	237	320	187	157	192	307	337	300	0.845053	8.66303e-06	OK	0.845281	1.11529e-05	OK	1.16427	4.60463e-09	OK	MLLT10	0.0478492	0.179305	0.26686	0.789577	0.914986	OK	0.0317771	0.19298	0.164665	0.869208	0.96695	OK
ENSG00000078618.21	1390	1300	1127	1511	847	838	1042	652	1053	1315	635	930	1368	1078	1328	1201	885	856	0.0312885	0.80305	OK	0.0584248	0.646784	OK	-0.107921	0.462563	OK	NRDC	-0.148079	0.139762	-1.05951	0.289367	0.568031	OK	-0.0572506	0.149901	-0.381923	0.702519	0.910356	OK
ENSG00000078668.14	452	576	485	475	338	328	498	337	614	528	305	451	477	461	543	381	367	374	-0.244905	0.0650842	OK	-0.231888	0.0784308	OK	-0.111673	0.397136	OK	VDAC3	0.183325	0.138404	1.32457	0.185315	0.446235	OK	0.103839	0.141241	0.735188	0.462225	0.787989	OK
ENSG00000078674.17	1000	1166	1055	1210	742	778	793	515	943	880	485	736	952	809	1123	731	641	703	0.0572383	0.646622	OK	0.000699172	0.996143	OK	-0.240208	0.0981821	OK	PCM1	-0.297485	0.142212	-2.09184	0.0364529	0.162642	OK	-0.484504	0.135081	-3.58678	0.000334792	0.00660911	OK
ENSG00000078687.17	136	202	183	250	159	191	100	80	85	169	94	145	145	174	208	156	136	135	0.476738	0.0813951	OK	0.974816	0.00025448	OK	-0.219417	0.33834	OK	TNRC6C	-0.487187	0.254976	-1.91071	0.0560413	0.215299	OK	-0.6485	0.245224	-2.64452	0.00818065	0.0794283	OK
ENSG00000078699.21	157	211	156	216	147	154	152	88	161	204	129	175	193	172	213	201	161	172	0.26909	0.378808	OK	0.476691	0.0230586	OK	-0.0458247	0.825385	OK	CBFA2T2	-0.120725	0.289547	-0.416945	0.676719	0.857194	OK	-0.0931174	0.294574	-0.316109	0.75192	0.928492	OK
ENSG00000078747.15	784	882	904	795	600	578	756	528	857	888	510	771	910	816	1114	720	699	676	0.0519414	0.738072	OK	0.0332619	0.768655	OK	-0.0754818	0.576791	OK	ITCH	0.0101876	0.157811	0.0645561	0.948527	0.980254	OK	0.118857	0.171894	0.691457	0.489278	0.805364	OK
ENSG00000078804.13	1075	889	753	2661	1383	1361	905	488	859	1848	901	1365	1443	954	1197	2215	1480	1444	1.18363	2.14466e-14	OK	0.742541	2.02481e-08	OK	0.715263	1.42856e-05	OK	TP53INP2	-0.461623	0.138477	-3.33358	0.000857359	0.0099219	OK	-0.0695599	0.161748	-0.430052	0.667158	0.898692	OK
ENSG00000078808.17	2591	3061	2961	2700	1954	2237	2182	1733	2542	2784	1762	2560	2790	3169	3757	2868	2602	3030	-0.0942496	0.355792	OK	0.0568061	0.608592	OK	0.00102719	0.993617	OK	SDF4	-0.000953122	0.113459	-0.00840055	0.993297	0.997618	OK	0.288201	0.12198	2.3627	0.0181425	0.136909	OK
ENSG00000078902.16	586	629	592	844	571	603	489	387	455	714	401	650	611	556	709	841	583	683	0.157635	0.278226	OK	0.304023	0.0670734	OK	0.285982	0.0559608	OK	TOLLIP	-0.0797781	0.134297	-0.594041	0.552485	0.785468	OK	0.0216937	0.152464	0.142288	0.886853	0.971167	OK
ENSG00000078967.13	139	126	124	133	81	64	107	68	102	123	64	112	115	103	102	112	84	78	-0.54293	0.0350043	OK	0.417526	0.131122	OK	0.175469	0.463138	OK	UBE2D4	0.303317	0.295729	1.02566	0.305054	0.584527	OK	0.270131	0.280565	0.962809	0.335644	0.695273	OK
ENSG00000079134.12	171	157	188	172	97	109	144	109	177	168	97	118	127	131	170	111	121	96	-0.359949	0.0664646	OK	-0.308848	0.151066	OK	-0.161552	0.497003	OK	THOC1	-0.0380133	0.214295	-0.177388	0.859204	0.945639	OK	-0.266979	0.23847	-1.11955	0.262905	0.624644	OK
ENSG00000079150.18	246	328	304	268	197	208	264	194	344	264	179	282	361	320	417	351	289	290	-0.151238	0.422325	OK	-0.0732449	0.714226	OK	0.158042	0.302292	OK	FKBP7	0.238501	0.20463	1.16552	0.243807	0.51777	OK	0.637525	0.18741	3.40178	0.000669495	0.0115775	OK
ENSG00000079156.17	78	82	79	105	59	59	101	67	105	97	51	99	91	85	102	96	65	77	0.195605	0.45126	OK	-0.0350367	0.889928	OK	0.0556062	0.823077	OK	OSBPL6	0.279364	0.267305	1.04511	0.29597	0.575404	OK	0.188447	0.265997	0.708455	0.478663	0.798295	OK
ENSG00000079246.16	3221	3304	3072	3004	1793	1720	2619	1862	2923	2927	1472	2131	3039	2438	3254	2140	1689	1827	-0.222248	0.0159381	OK	-0.235208	0.020185	OK	-0.326541	0.0161431	OK	XRCC5	-0.0334285	0.0949929	-0.351905	0.724909	0.883181	OK	-0.211087	0.126097	-1.67401	0.0941295	0.377439	OK
ENSG00000079257.8	686	1174	959	890	822	815	397	344	611	486	415	648	449	543	643	421	605	559	0.156847	0.395167	OK	0.167733	0.394193	OK	0.199853	0.317048	OK	LXN	-0.756974	0.197153	-3.83953	0.000123272	0.00202307	OK	-0.684861	0.202768	-3.37756	0.00073133	0.0124821	OK
ENSG00000079263.19	21	19	14	34	24	17	26	14	18	50	17	7	17	15	18	12	12	10	0.973372	0.0811947	OK	-0.230698	0.729191	OK	-0.126794	0.846561	OK	SP140	-0.278751	0.631081	-0.441704	0.658703	0.847576	OK	-1.22	0.595708	-2.04798	0.0405616	0.231568	OK
ENSG00000079277.21	141	155	122	141	88	100	104	76	109	128	64	77	114	99	92	75	84	81	0.0417549	0.853041	OK	-0.170151	0.532144	OK	-0.0263492	0.915042	OK	MKNK1	-0.378882	0.256554	-1.47681	0.139726	0.383087	OK	-0.467543	0.239823	-1.94954	0.0512312	0.267865	OK
ENSG00000079308.19	7468	7228	6833	4591	2961	3310	8320	5729	8677	7142	4204	5994	10155	8150	9423	5432	4402	4528	-0.709593	8.74308e-17	OK	-0.36778	7.67676e-05	OK	-0.696561	5.41339e-11	OK	TNS1	0.608597	0.0961609	6.32894	2.4685e-10	1.40484e-08	OK	0.341919	0.0939173	3.64064	0.00027196	0.00555274	OK
ENSG00000079313.15	486	453	476	495	339	378	407	310	427	488	274	404	436	416	510	453	347	422	0.227539	0.117027	OK	-0.244398	0.219578	OK	0.269599	0.0889608	OK	REXO1	-0.262866	0.167987	-1.56481	0.117629	0.345509	OK	0.0515034	0.176777	0.291347	0.770786	0.935694	OK
ENSG00000079332.15	2206	2419	2238	2138	1331	1388	2232	1503	2668	2242	1104	1676	2512	2132	2970	1939	1401	1537	-0.21968	0.010516	OK	-0.400219	0.000160908	OK	-0.354349	0.000574799	OK	SAR1A	0.00669299	0.102788	0.0651145	0.948083	0.980191	OK	0.0771978	0.109957	0.70207	0.482635	0.800394	OK
ENSG00000079335.20	59	60	39	55	35	44	56	27	67	44	28	37	33	28	47	28	38	20	-0.155678	0.671095	OK	-0.488252	0.183592	OK	0.00955067	0.982505	OK	CDC14A	-0.549485	0.356305	-1.54218	0.123031	0.355273	OK	-0.757354	0.409903	-1.84764	0.0646539	0.304682	OK
ENSG00000079337.16	142	175	161	128	80	83	165	104	180	158	70	121	235	163	204	127	121	105	-0.663038	0.00233381	OK	-0.538155	0.0149782	OK	-0.84369	4.83868e-05	OK	RAPGEF3	0.427385	0.239233	1.78648	0.0740219	0.257328	OK	0.380934	0.233253	1.63314	0.10244	0.396337	OK
ENSG00000079387.14	245	201	207	272	148	156	164	143	222	252	147	180	265	200	259	227	171	201	-0.0630432	0.760483	OK	0.188357	0.32835	OK	-0.139615	0.446613	OK	SENP1	0.168983	0.186786	0.904689	0.36563	0.643979	OK	0.0932994	0.188472	0.49503	0.620579	0.880768	OK
ENSG00000079432.7	2008	2085	1880	2137	1358	1480	1552	1243	1683	2070	1192	1757	2163	1872	2359	1903	1594	1761	-0.0632191	0.489171	OK	0.0782263	0.503929	OK	0.0244821	0.806784	OK	CIC	-0.0302632	0.103251	-0.293102	0.769444	0.905064	OK	0.124816	0.108384	1.15162	0.249478	0.61083	OK
ENSG00000079435.10	21	15	9	14	14	10	22	4	19	20	10	10	18	18	15	15	14	13	0.313082	0.651263	OK	0.128101	0.850578	OK	-0.0902204	0.881659	OK	LIPE	-0.806817	0.673184	-1.19851	0.230719	0.503686	OK	-0.899784	0.628101	-1.43255	0.151987	0.491429	OK
ENSG00000079459.13	2116	822	771	4190	1203	1430	1423	450	714	3472	1226	1845	1988	821	988	4390	1926	2469	1.11146	0.0641184	OK	1.34705	0.00171672	OK	1.52348	0.00162201	OK	FDFT1	-0.0269625	0.401371	-0.067176	0.946442	0.97929	OK	0.452767	0.463169	0.977542	0.328301	0.68876	OK
ENSG00000079462.7	242	238	199	236	134	138	163	120	171	245	131	189	208	201	242	225	157	179	-0.33194	0.0823775	OK	0.216539	0.279617	OK	0.111497	0.579316	OK	PAFAH1B3	0.0720059	0.210672	0.341792	0.732508	0.887206	OK	0.222799	0.224146	0.99399	0.320228	0.681419	OK
ENSG00000079482.13	274	273	258	347	222	267	252	127	195	282	132	191	297	239	299	265	189	226	0.505802	0.00915792	OK	-0.253771	0.228718	OK	0.412592	0.129527	OK	OPHN1	-0.811896	0.195718	-4.1483	3.34952e-05	0.000638933	OK	-0.0721651	0.283124	-0.254889	0.798809	0.945871	OK
ENSG00000079616.12	164	181	173	143	85	105	180	100	139	207	99	137	101	115	160	67	85	100	-0.476806	0.034889	OK	-0.0837361	0.720019	OK	-0.464491	0.0766507	OK	KIF22	0.288518	0.236342	1.22077	0.222175	0.493507	OK	-0.223855	0.283743	-0.788934	0.430151	0.765257	OK
ENSG00000079691.18	262	295	278	314	240	213	218	145	275	265	142	224	324	251	388	240	230	232	0.134296	0.414795	OK	0.0474189	0.799445	OK	-0.19995	0.24601	OK	CARMIL1	-0.237971	0.181472	-1.31133	0.189745	0.452267	OK	-0.0821288	0.178428	-0.46029	0.645308	0.89114	OK
ENSG00000079739.17	838	1397	1367	881	865	1061	855	795	1389	1117	822	1207	1369	1455	1792	1166	1109	1174	-0.0437727	0.835479	OK	-0.00672767	0.966593	OK	-0.185675	0.112402	OK	PGM1	0.0697322	0.193825	0.359769	0.71902	0.87904	OK	0.239747	0.18657	1.28502	0.198784	0.553324	OK
ENSG00000079785.15	953	989	945	844	536	546	881	619	1096	971	514	686	993	878	1090	668	582	621	-0.263853	0.016533	OK	-0.243558	0.0482926	OK	-0.383049	0.000695254	OK	DDX1	0.133747	0.125203	1.06824	0.285413	0.564139	OK	-0.0588917	0.123644	-0.476299	0.633862	0.886068	OK
ENSG00000079805.16	1347	1440	1323	1334	991	1023	1158	879	1316	1387	734	1121	1395	1304	1529	1228	1071	1064	-0.0433331	0.662164	OK	-0.236876	0.0308548	OK	-0.133949	0.211176	OK	DNM2	-0.139324	0.107542	-1.29552	0.195139	0.459184	OK	-0.0143837	0.116133	-0.123855	0.90143	0.974996	OK
ENSG00000079819.19	868	1075	1252	880	724	880	555	498	843	699	479	776	907	913	1513	800	787	972	-0.0316411	0.855161	OK	-0.00102887	0.995026	OK	0.176359	0.405529	OK	EPB41L2	-0.49069	0.176063	-2.78701	0.00531963	0.0412836	OK	0.141319	0.213251	0.662691	0.507528	0.816867	OK
ENSG00000079841.18	158	118	160	202	128	164	157	108	187	216	177	193	260	187	239	277	177	219	0.686046	0.00318927	OK	0.468606	0.051816	OK	0.0352735	0.857951	OK	RIMS1	0.133638	0.232242	0.575426	0.565004	0.793459	OK	0.331833	0.209842	1.58135	0.113799	0.42114	OK
ENSG00000079931.15	693	775	692	654	455	453	781	572	790	944	471	640	707	692	883	613	510	551	-0.213574	0.0599323	OK	-0.147935	0.237807	OK	-0.222014	0.0669483	OK	MOXD1	0.352668	0.13209	2.66991	0.00758708	0.0533732	OK	0.112917	0.128406	0.879378	0.379197	0.729048	OK
ENSG00000079950.14	546	561	619	628	410	406	452	380	519	660	383	511	595	482	651	582	433	444	0.347181	0.0117172	OK	0.40856	0.00498608	OK	0.0446417	0.8028	OK	STX7	0.191748	0.149774	1.28025	0.200457	0.466167	OK	-0.129186	0.162724	-0.793894	0.427257	0.763614	OK
ENSG00000079974.17	294	343	278	270	175	217	279	210	339	338	189	241	314	284	334	257	220	197	-0.121078	0.499438	OK	-0.360253	0.0317518	OK	-0.175641	0.376882	OK	RABL2B	0.0691332	0.172017	0.401898	0.687759	0.862204	OK	0.0677941	0.205688	0.329597	0.741704	0.925312	OK
ENSG00000079999.14	436	572	474	441	300	279	418	280	418	490	242	334	481	442	472	328	307	280	-0.324864	0.0379077	OK	-0.154328	0.423799	OK	-0.622457	2.41763e-05	OK	KEAP1	0.174839	0.198672	0.880037	0.378839	0.65575	OK	-0.136158	0.158761	-0.857627	0.391098	0.737145	OK
ENSG00000080189.15	449	528	501	557	350	429	395	328	495	484	311	432	505	438	634	504	398	390	0.0163424	0.903052	OK	-0.107306	0.439563	OK	-0.0829096	0.574127	OK	SLC35C2	-0.116631	0.139013	-0.838989	0.401476	0.674721	OK	-0.00237034	0.156175	-0.0151774	0.987891	0.997443	OK
ENSG00000080200.10	330	388	361	434	254	285	306	213	378	391	262	374	338	334	413	305	314	288	-0.0711518	0.656756	OK	0.275721	0.0635574	OK	0.104147	0.503089	OK	CRYBG3	0.188618	0.148892	1.26681	0.205225	0.47198	OK	0.0581186	0.160428	0.362273	0.717148	0.915592	OK
ENSG00000080298.15	68	71	81	209	146	141	55	59	77	149	110	128	61	63	103	117	138	137	1.48194	7.64257e-07	OK	1.53448	7.8432e-06	OK	1.06286	0.00182398	OK	RFX3	-0.196889	0.301871	-0.652228	0.514254	0.761031	OK	-0.326663	0.28423	-1.14929	0.250436	0.611637	OK
ENSG00000080345.18	682	789	742	854	542	535	606	424	749	828	400	561	600	526	852	580	513	518	0.126024	0.302409	OK	0.0321034	0.814818	OK	0.0360669	0.793681	OK	RIF1	-0.108388	0.134271	-0.807231	0.419533	0.689372	OK	-0.182938	0.129921	-1.40807	0.159109	0.501951	OK
ENSG00000080371.6	544	565	636	664	466	517	463	355	562	623	344	533	572	489	700	570	450	460	0.366586	0.0092545	OK	0.164326	0.224161	OK	0.170909	0.211484	OK	RAB21	-0.0895723	0.150563	-0.594915	0.5519	0.78538	OK	-0.0439011	0.148306	-0.296017	0.767217	0.934462	OK
ENSG00000080493.17	287	294	326	381	278	258	377	283	541	537	288	474	384	342	396	394	298	267	0.303877	0.0445746	OK	0.191331	0.187424	OK	0.21323	0.19259	OK	SLC4A4	0.520838	0.142792	3.64754	0.000264762	0.00381268	OK	0.263781	0.169659	1.55477	0.12	0.43464	OK
ENSG00000080503.24	769	813	681	742	473	442	529	400	558	624	307	515	624	563	725	510	415	394	-0.317258	0.0164273	OK	0.0100236	0.957843	OK	-0.198059	0.184222	OK	SMARCA2	-0.135463	0.194399	-0.696832	0.485908	0.739591	OK	-0.215289	0.140815	-1.52888	0.126293	0.445974	OK
ENSG00000080546.13	139	180	160	200	150	142	191	112	147	236	130	185	189	151	200	202	195	175	0.286747	0.176013	OK	0.240324	0.295773	OK	0.120773	0.533501	OK	SESN1	0.295822	0.200303	1.47687	0.13971	0.383087	OK	0.211731	0.202236	1.04695	0.295123	0.656517	OK
ENSG00000080561.13	85	101	102	93	61	54	76	29	66	71	51	82	108	76	88	105	81	82	-0.350494	0.233033	OK	0.220027	0.517639	OK	0.207624	0.434616	OK	MID2	-0.164392	0.298853	-0.550076	0.582267	0.80503	OK	0.307977	0.269082	1.14455	0.252397	0.613218	OK
ENSG00000080603.17	1299	1699	1369	949	561	756	1064	753	1290	974	485	791	1092	1228	1770	589	548	614	-0.505757	2.53635e-05	OK	-0.492318	3.62718e-05	OK	-1.05348	5.59268e-10	OK	SRCAP	-0.228684	0.144367	-1.58405	0.113182	0.338415	OK	-0.663608	0.160686	-4.12986	3.62989e-05	0.00106096	OK
ENSG00000080608.10	340	334	301	363	180	211	311	205	286	352	172	233	317	247	358	285	224	240	-0.246738	0.163506	OK	-0.0862653	0.599751	OK	-0.0013953	0.993884	OK	PUM3	-0.0140401	0.173583	-0.0808843	0.935534	0.976177	OK	0.0424298	0.17475	0.242803	0.808158	0.948998	OK
ENSG00000080802.18	238	315	239	470	354	335	195	164	237	381	263	317	296	238	335	329	376	315	0.75486	4.21374e-06	OK	0.680994	0.00015601	OK	0.442519	0.0127052	OK	CNOT4	-0.25828	0.164373	-1.57131	0.116112	0.342462	OK	-0.144953	0.175149	-0.827598	0.407898	0.749157	OK
ENSG00000080815.19	879	985	990	1364	785	747	693	508	865	914	481	784	933	843	1148	920	749	785	0.476003	5.57939e-05	OK	0.111327	0.404216	OK	0.103254	0.39837	OK	PSEN1	-0.561779	0.123631	-4.544	5.5197e-06	0.000132365	OK	-0.361845	0.113502	-3.18801	0.00143254	0.0214113	OK
ENSG00000080819.9	113	147	135	145	113	132	119	105	130	167	116	131	105	91	150	102	128	124	0.175358	0.430938	OK	0.111186	0.616529	OK	0.203986	0.446525	OK	CPOX	0.0319631	0.226344	0.141214	0.887701	0.959665	OK	-0.15942	0.249458	-0.639065	0.522781	0.825258	OK
ENSG00000080822.17	394	389	399	604	414	358	472	344	603	662	354	471	451	380	482	419	356	339	0.495412	0.000169491	OK	0.0767925	0.570922	OK	0.00278594	0.983758	OK	CLDND1	0.0912754	0.137544	0.663608	0.506941	0.756227	OK	-0.286248	0.142747	-2.00529	0.0449324	0.247153	OK
ENSG00000080823.23	351	419	377	290	212	233	479	302	423	445	247	331	271	271	334	230	233	248	-0.281452	0.137308	OK	-0.239162	0.137719	OK	-0.0715141	0.716737	OK	MOK	0.294263	0.194115	1.51593	0.129538	0.366426	OK	-0.162157	0.214212	-0.756995	0.449053	0.779227	OK
ENSG00000080824.18	8759	9308	9188	15449	14167	11717	7325	4951	8213	12228	11026	11607	7856	6696	9662	13062	18029	14001	0.911869	1.95676e-13	OK	0.803254	1.3892e-07	OK	1.18653	1.8539e-14	OK	HSP90AA1	-0.238435	0.173895	-1.37114	0.170331	0.426676	OK	0.132444	0.176055	0.752291	0.451876	0.781154	OK
ENSG00000080839.12	81	92	86	56	37	51	105	42	90	96	35	64	51	44	80	49	40	41	-0.689957	0.0197968	OK	-0.277531	0.383296	OK	-0.0178305	0.958916	OK	RBL1	0.436581	0.320809	1.36088	0.173553	0.430322	OK	0.0281435	0.352159	0.079917	0.936303	0.984695	OK
ENSG00000080845.17	2213	2257	2248	2299	1742	1866	1770	1375	2104	2066	1323	1928	2463	2156	2509	2229	1962	2076	0.0954324	0.365587	OK	-0.061046	0.558318	OK	0.038915	0.694171	OK	DLGAP4	-0.233776	0.119306	-1.95947	0.050058	0.200496	OK	0.0428768	0.117278	0.365599	0.714665	0.915206	OK
ENSG00000080947.15	26	24	18	18	12	12	17	18	22	29	11	23	26	13	28	15	26	16	0.413606	0.487025	OK	0.0525139	0.927455	OK	-0.098303	0.864534	OK	CROCCP3	0.213872	0.60949	0.350904	0.725661	0.883384	OK	-0.130398	0.642705	-0.202889	0.839222	0.957316	OK
ENSG00000080986.13	48	36	41	47	27	27	63	36	60	117	43	59	15	15	55	14	25	49	0.00824699	0.982254	OK	0.513277	0.132887	OK	0.296669	0.634992	OK	NDC80	1.10819	0.364149	3.04324	0.00234043	0.021572	OK	-0.200769	0.502427	-0.399599	0.689452	0.905635	OK
ENSG00000081014.11	271	309	319	312	191	178	239	177	283	287	188	233	289	261	351	247	182	237	-0.144677	0.387912	OK	-0.0315478	0.848912	OK	-0.19187	0.276716	OK	AP4E1	-0.0245561	0.170153	-0.144318	0.885249	0.958227	OK	0.0318909	0.171883	0.185539	0.852806	0.961294	OK
ENSG00000081019.13	131	159	177	73	55	51	94	98	148	96	68	91	122	119	143	78	68	62	-0.463142	0.16792	OK	-0.268489	0.281057	OK	-0.262114	0.311073	OK	RSBN1	0.113768	0.361697	0.314541	0.753111	0.898369	OK	-0.142831	0.382199	-0.37371	0.70862	0.912723	OK
ENSG00000081026.19	149	166	149	231	179	192	140	99	131	241	157	222	190	173	200	184	191	218	0.807494	3.01787e-05	OK	0.909016	5.97205e-05	OK	0.210174	0.262273	OK	MAGI3	0.0576127	0.220999	0.260693	0.79433	0.9167	OK	-0.30342	0.202161	-1.50088	0.133386	0.458686	OK
ENSG00000081041.9	3	5	13	796	953	906	4	5	1	37	40	57	2	1	3	30	54	112	7.04999	8.98121e-39	OK	3.81008	2.38455e-08	OK	5.33543	1.30647e-11	OK	CXCL2	-4.27511	0.275252	-15.5316	2.11934e-54	1.85965e-51	OK	-3.77407	0.620848	-6.0789	1.21011e-09	9.7914e-08	OK
ENSG00000081052.12	4922	5374	4949	4701	2680	2686	3473	3725	5605	3930	2600	3852	7757	7909	6547	5284	4055	3209	-0.331859	0.000944675	OK	-0.361217	0.014415	OK	-0.613427	0.000277536	OK	COL4A4	0.014552	0.124403	0.116975	0.90688	0.966272	OK	0.31682	0.148497	2.13351	0.0328831	0.204002	OK
ENSG00000081059.20	581	448	388	290	131	116	381	225	319	326	116	201	389	216	215	216	105	136	-1.30689	1.33389e-08	OK	-0.530866	0.0348083	OK	-0.588034	0.0649531	OK	TCF7	0.411833	0.291089	1.4148	0.157127	0.409779	OK	0.0471188	0.271206	0.173738	0.862071	0.964413	OK
ENSG00000081087.15	520	504	529	539	317	346	505	349	579	598	329	473	772	582	614	692	401	460	-0.243041	0.0652933	OK	-0.357471	0.00941047	OK	-0.378923	0.101631	OK	OSTM1	0.100054	0.139428	0.717606	0.473	0.730158	OK	0.45583	0.243171	1.87453	0.0608579	0.295454	OK
ENSG00000081154.12	771	867	903	803	558	625	621	557	825	725	464	713	814	677	879	717	564	631	-0.137717	0.229902	OK	-0.118466	0.35835	OK	-0.0349215	0.770808	OK	PCNP	-0.00720396	0.135701	-0.0530871	0.957663	0.984055	OK	0.0829841	0.135855	0.61083	0.541312	0.838515	OK
ENSG00000081177.18	138	120	107	143	90	105	103	61	121	131	76	118	135	109	151	95	99	102	0.0528409	0.808349	OK	0.0202123	0.93194	OK	-0.243167	0.284511	OK	EXD2	-0.0544374	0.227305	-0.23949	0.810725	0.924436	OK	-0.158707	0.23694	-0.669819	0.502973	0.814446	OK
ENSG00000081189.15	73	76	57	79	50	48	50	41	68	107	41	65	65	75	111	83	75	90	0.464244	0.124027	OK	0.51226	0.122763	OK	0.217726	0.471383	OK	MEF2C	0.0557113	0.333491	0.167055	0.867327	0.94973	OK	0.135801	0.300276	0.452254	0.651086	0.893569	OK
ENSG00000081307.12	272	341	311	294	191	234	204	192	259	241	135	227	295	292	375	218	257	202	-0.474478	0.0263004	OK	-0.404009	0.0337981	OK	-0.346215	0.120738	OK	UBA5	-0.236927	0.235258	-1.00709	0.313891	0.593511	OK	0.117177	0.256168	0.45742	0.647369	0.89253	OK
ENSG00000081320.11	944	1087	855	1156	742	718	516	413	652	753	430	645	550	550	718	702	578	630	0.266671	0.0641371	OK	0.342329	0.00684379	OK	0.495827	0.00017053	OK	STK17B	-0.487289	0.149088	-3.26846	0.00108135	0.0119962	OK	-0.374487	0.14791	-2.53186	0.011346	0.099253	OK
ENSG00000081377.17	314	339	300	313	179	178	309	202	281	312	141	225	370	278	346	301	180	198	-0.353355	0.0379628	OK	-0.326798	0.0835281	OK	-0.395728	0.066446	OK	CDC14B	-0.0081746	0.191604	-0.0426639	0.965969	0.987663	OK	-0.0132327	0.218926	-0.0604437	0.951802	0.987746	OK
ENSG00000081386.12	139	177	185	91	56	61	126	80	149	108	64	78	145	117	181	75	62	63	-1.02867	0.000398667	OK	-0.523451	0.106996	OK	-0.738124	0.00453012	OK	ZNF510	0.312351	0.340707	0.916771	0.359263	0.638053	OK	0.126403	0.339251	0.372593	0.709451	0.913121	OK
ENSG00000081665.14	50	32	42	85	42	44	23	21	21	52	41	52	58	29	48	68	64	61	1.04727	0.00661847	OK	1.12453	0.0115417	OK	0.796029	0.0191678	OK	ZNF506	-0.186312	0.366293	-0.508641	0.611004	0.823512	OK	-0.0433162	0.334707	-0.129415	0.897029	0.974576	OK
ENSG00000081692.12	177	194	178	136	69	71	168	124	190	139	83	125	201	189	217	141	100	85	-0.711437	0.00124542	OK	-0.777589	0.000147015	OK	-0.597205	0.0240309	OK	JMJD4	0.0992798	0.246519	0.402726	0.68715	0.861981	OK	0.237746	0.303687	0.782866	0.433706	0.767934	OK
ENSG00000081721.12	130	130	83	114	72	52	95	85	97	128	59	74	91	97	114	82	71	54	-0.307524	0.274463	OK	-0.067535	0.797067	OK	-0.160313	0.543821	OK	DUSP12	0.198774	0.294169	0.675715	0.499222	0.750414	OK	-0.0509768	0.300225	-0.169796	0.865171	0.965409	OK
ENSG00000081760.17	448	442	336	463	218	202	451	319	453	499	256	346	526	409	413	345	277	264	-0.272406	0.160244	OK	-0.201942	0.151311	OK	-0.402409	0.0179346	OK	AACS	0.325679	0.192727	1.68984	0.0910576	0.295343	OK	0.0622307	0.200399	0.310535	0.756154	0.930499	OK
ENSG00000081791.9	473	496	402	540	337	328	478	304	486	593	325	438	514	458	535	519	370	360	-0.14021	0.302907	OK	0.138044	0.334195	OK	-0.0131151	0.929193	OK	DELE1	0.23062	0.153086	1.50648	0.131945	0.370433	OK	0.219026	0.159462	1.37352	0.169589	0.517935	OK
ENSG00000081803.16	83	103	70	106	47	56	61	49	66	61	34	36	59	68	65	60	37	33	-0.185972	0.527365	OK	-0.477896	0.134849	OK	-0.313343	0.342913	OK	CADPS2	-0.621054	0.321417	-1.93224	0.05333	0.208659	OK	-0.609949	0.332404	-1.83496	0.066511	0.309049	OK
ENSG00000081842.18	48	53	58	39	26	17	35	29	18	39	11	27	67	56	44	41	38	18	-0.843634	0.0347229	OK	-0.40724	0.396842	OK	-0.816691	0.0201014	OK	PCDHA6	-0.243376	0.489246	-0.497451	0.618871	0.82755	OK	0.39122	0.436666	0.895925	0.370293	0.723018	OK
ENSG00000081853.15	160	111	94	164	115	82	142	86	100	109	78	71	153	118	138	118	98	77	0.180707	0.485594	OK	-0.387516	0.161899	OK	-0.207146	0.389262	OK	PCDHGA2	-0.524151	0.262935	-1.99346	0.0462106	0.189655	OK	-0.275792	0.254569	-1.08337	0.278645	0.639475	OK
ENSG00000081870.11	95	116	77	114	78	69	102	79	109	129	89	119	100	74	96	69	83	74	0.0791974	0.776029	OK	0.216214	0.408894	OK	0.165198	0.524877	OK	HSPB11	0.332841	0.257078	1.29471	0.19542	0.459552	OK	-0.199193	0.257849	-0.772518	0.439808	0.772167	OK
ENSG00000081913.14	288	359	352	400	335	328	309	202	298	427	251	366	194	188	316	249	256	250	0.351945	0.026441	OK	0.247948	0.0987325	OK	0.145008	0.406278	OK	PHLPP1	-0.0738203	0.157518	-0.468648	0.639321	0.838457	OK	-0.535109	0.1697	-3.15327	0.00161455	0.0236994	OK
ENSG00000081923.14	2316	2377	2546	3579	2354	2386	1759	1284	2240	2739	1566	2260	2028	1868	2569	2305	2077	1931	0.520666	3.18144e-08	OK	0.3125	0.00248487	OK	0.22025	0.0416834	OK	ATP8B1	-0.449225	0.0954079	-4.70846	2.49594e-06	6.59653e-05	OK	-0.453925	0.0985687	-4.60517	4.12133e-06	0.000160781	OK
ENSG00000082014.16	444	473	393	359	252	231	401	308	433	423	234	356	493	419	549	369	304	348	-0.4866	0.000634697	OK	-0.237178	0.0992286	OK	-0.299824	0.034159	OK	SMARCD3	0.366756	0.15938	2.30114	0.0213839	0.112943	OK	0.385357	0.161342	2.38845	0.0169198	0.130033	OK
ENSG00000082068.9	212	220	198	245	161	144	147	132	192	233	126	183	209	142	182	195	140	133	-0.335302	0.230904	OK	-0.235401	0.255239	OK	-0.294522	0.175878	OK	WDR70	-0.141387	0.217273	-0.650733	0.515219	0.761669	OK	-0.50952	0.239344	-2.12881	0.0332696	0.205513	OK
ENSG00000082126.18	17	19	26	23	11	28	40	16	26	34	12	26	8	9	26	8	4	16	0.0915878	0.862657	OK	-0.282546	0.558045	OK	-0.822072	0.318491	OK	MPP4	0.00547823	0.508894	0.010765	0.991411	0.997373	OK	-1.21469	0.665227	-1.82597	0.0678547	0.312632	OK
ENSG00000082146.13	422	445	422	440	262	284	394	281	400	472	212	371	426	299	459	326	300	289	0.0144069	0.917396	OK	-0.0344058	0.835724	OK	-0.139503	0.376028	OK	STRADB	0.0296648	0.170069	0.174428	0.861529	0.946927	OK	-0.210319	0.168892	-1.24529	0.213026	0.570449	OK
ENSG00000082153.18	2987	3222	3196	3419	2109	2260	2643	2122	3372	3379	1832	2709	3140	2606	3507	2908	2353	2575	-0.112937	0.253344	OK	-0.214206	0.0336355	OK	-0.0109975	0.912248	OK	BZW1	-0.000231633	0.104354	-0.00221969	0.998229	0.999516	OK	0.0422732	0.113071	0.373866	0.708504	0.912723	OK
ENSG00000082212.13	272	235	226	211	149	121	225	125	256	236	132	184	222	158	244	185	130	129	-0.500286	0.0129701	OK	-0.210367	0.287847	OK	-0.261519	0.232529	OK	ME2	0.17316	0.209618	0.826076	0.408761	0.681027	OK	-0.0885741	0.227376	-0.389549	0.69687	0.907863	OK
ENSG00000082213.18	236	255	248	190	139	125	223	172	271	281	143	227	272	178	240	230	161	135	-0.666207	0.000299475	OK	-0.151051	0.394445	OK	-0.3403	0.125974	OK	C5orf22	0.62505	0.191161	3.26975	0.00107643	0.0119561	OK	0.267011	0.213524	1.2505	0.211119	0.567857	OK
ENSG00000082258.13	340	345	320	294	213	220	220	197	286	340	271	255	344	313	343	237	320	238	-0.276454	0.101446	OK	0.45665	0.0195647	OK	-0.115749	0.593694	OK	CCNT2	0.498726	0.197285	2.52795	0.011473	0.0720651	OK	0.23012	0.207316	1.11	0.267	0.628902	OK
ENSG00000082269.16	59	63	78	144	80	54	57	46	75	97	50	59	63	70	90	83	64	71	0.593607	0.0595839	OK	0.201494	0.526447	OK	-0.2422	0.401127	OK	FAM135A	-0.517775	0.32358	-1.60015	0.109566	0.331709	OK	-0.287019	0.294952	-0.973104	0.330501	0.690913	OK
ENSG00000082397.17	435	478	473	336	257	316	414	295	428	454	240	334	477	405	600	385	361	369	-0.0116838	0.957969	OK	-0.280967	0.130768	OK	0.00227497	0.99053	OK	EPB41L3	-0.0985992	0.2342	-0.421004	0.673752	0.85549	OK	0.241459	0.243046	0.993471	0.320481	0.681626	OK
ENSG00000082438.17	110	138	118	148	105	76	117	83	141	147	84	106	104	114	138	129	107	108	-0.00429663	0.985407	OK	0.11809	0.62642	OK	0.335151	0.152775	OK	COBLL1	0.268989	0.236319	1.13824	0.255019	0.529425	OK	0.270284	0.2469	1.09471	0.273642	0.634642	OK
ENSG00000082458.12	317	290	256	332	229	194	226	156	232	268	179	260	275	219	308	258	206	229	0.174221	0.449124	OK	0.148596	0.528382	OK	0.193827	0.268064	OK	DLG3	-0.455894	0.240999	-1.89168	0.0585333	0.221958	OK	-0.156385	0.197551	-0.791618	0.428583	0.763967	OK
ENSG00000082482.13	448	523	535	424	301	283	86	78	134	115	53	101	419	264	455	338	219	268	-0.342425	0.0165626	OK	-0.329622	0.225192	OK	-0.223931	0.212759	OK	KCNK2	-1.92662	0.201955	-9.53982	1.43079e-21	2.47791e-19	OK	-0.264636	0.168236	-1.57301	0.115717	0.425475	OK
ENSG00000082497.12	272	347	300	265	159	182	550	431	692	609	431	441	488	425	517	331	418	290	-0.591265	0.000731236	OK	-0.156805	0.422349	OK	-0.349334	0.157116	OK	SERTAD4	1.59648	0.201831	7.90998	2.57422e-15	2.73241e-13	OK	0.998631	0.271828	3.67376	0.000239003	0.00498068	OK
ENSG00000082512.15	583	477	448	583	327	342	568	390	586	600	320	421	551	380	546	481	413	360	0.0381627	0.830652	OK	-0.28138	0.0318296	OK	0.012313	0.935455	OK	TRAF5	0.0183562	0.150622	0.12187	0.903002	0.965729	OK	0.025621	0.159934	0.160197	0.872726	0.967521	OK
ENSG00000082515.18	115	122	125	133	66	55	92	62	100	85	57	65	121	81	123	89	79	65	-0.0560125	0.846852	OK	-0.169805	0.572017	OK	-0.355649	0.177866	OK	MRPL22	-0.265005	0.338554	-0.782754	0.433772	0.699841	OK	-0.208427	0.326302	-0.638756	0.522982	0.825258	OK
ENSG00000082516.9	320	323	278	183	101	85	264	184	236	173	82	102	222	218	223	88	77	89	-0.81806	0.00121453	OK	-0.688568	0.0108822	OK	-1.23121	5.91762e-09	OK	GEMIN5	-0.0568418	0.336355	-0.168994	0.865802	0.949224	OK	-0.832149	0.299838	-2.77533	0.00551458	0.0595801	OK
ENSG00000082641.16	5441	6336	5998	6420	4118	4495	3618	3059	4778	4964	3066	4767	6483	6101	7448	5946	4747	5392	0.0587033	0.532628	OK	0.0619522	0.60316	OK	-0.0367763	0.669342	OK	NFE2L1	-0.276228	0.11486	-2.40491	0.0161763	0.0929207	OK	0.0784637	0.0997429	0.786659	0.431481	0.766281	OK
ENSG00000082701.15	1025	989	982	1674	1053	955	878	671	976	1537	755	1023	953	863	1190	1145	839	980	0.841069	1.97511e-07	OK	0.321944	0.0263157	OK	0.303806	0.0388636	OK	GSK3B	-0.231325	0.172697	-1.33948	0.180413	0.439333	OK	-0.347878	0.16564	-2.10021	0.0357108	0.213077	OK
ENSG00000082781.12	12382	14317	14592	12814	8955	9983	9877	8028	12536	12464	7234	11261	16355	17037	21169	14838	12604	14587	-0.0442979	0.653211	OK	-0.00913207	0.932933	OK	-0.0867514	0.472972	OK	ITGB5	-0.0726106	0.119884	-0.605672	0.544733	0.780715	OK	0.37937	0.117499	3.2287	0.00124354	0.0190202	OK
ENSG00000082805.20	1171	1235	1195	1310	854	927	997	690	1185	1284	671	1006	1292	1217	1477	1097	868	1013	0.110792	0.405398	OK	0.0441135	0.666034	OK	-0.16954	0.0968489	OK	ERC1	-0.213055	0.130339	-1.63463	0.102127	0.317628	OK	-0.178453	0.135173	-1.32019	0.186773	0.537951	OK
ENSG00000082898.17	1249	1280	1258	2672	1907	1751	1450	1041	1475	2486	1310	1836	1042	882	1188	1994	2122	1845	1.12351	1.17932e-33	OK	0.431391	0.000479889	OK	1.25124	1.92641e-14	OK	XPO1	-0.161337	0.103944	-1.55216	0.120624	0.351096	OK	-0.0548142	0.152835	-0.358648	0.719858	0.915766	OK
ENSG00000082996.19	296	308	322	422	272	305	190	172	295	331	210	288	394	342	401	441	359	321	0.287691	0.101066	OK	0.0440368	0.797718	OK	0.450418	0.00759994	OK	RNF13	-0.3086	0.158665	-1.94498	0.0517776	0.204777	OK	0.417842	0.168583	2.47856	0.0131916	0.110067	OK
ENSG00000083067.22	30	22	16	33	17	21	11	11	11	11	8	10	11	7	23	13	14	8	-0.27387	0.677701	OK	-2.50571	0.00446141	OK	0.248105	0.769125	OK	TRPM3	-1.84856	0.655007	-2.8222	0.00476961	0.038279	OK	-0.142046	0.720045	-0.197274	0.843613	0.958417	OK
ENSG00000083093.9	176	184	152	133	81	101	139	105	159	186	88	155	147	115	180	134	113	124	-0.418229	0.044196	OK	-0.142947	0.560389	OK	0.0592549	0.810943	OK	PALB2	0.501693	0.232914	2.15398	0.0312414	0.146575	OK	0.488128	0.238127	2.04986	0.0403781	0.230923	OK
ENSG00000083097.14	185	192	179	157	92	83	131	76	165	114	62	94	139	157	191	94	91	77	-0.356765	0.160326	OK	-0.295662	0.423197	OK	-0.142736	0.651514	OK	DOP1A	-0.256435	0.318727	-0.804561	0.421073	0.689701	OK	-0.153742	0.345271	-0.44528	0.656118	0.894942	OK
ENSG00000083099.11	427	421	342	486	259	255	392	237	370	448	237	383	308	302	367	399	316	371	0.253247	0.168472	OK	-0.0328845	0.834779	OK	0.373202	0.0296565	OK	LYRM2	-0.0315979	0.168326	-0.187719	0.851097	0.942148	OK	0.245594	0.178975	1.37222	0.169994	0.518119	OK
ENSG00000083123.15	180	185	188	181	96	115	133	97	152	116	84	102	166	142	172	124	97	87	-0.29934	0.1384	OK	-0.414929	0.0653551	OK	-0.3317	0.150653	OK	BCKDHB	-0.223642	0.234376	-0.954199	0.339983	0.620063	OK	-0.0830908	0.245571	-0.338358	0.735093	0.921402	OK
ENSG00000083168.11	773	863	850	924	639	656	477	427	674	775	440	670	777	712	961	719	610	706	0.0991135	0.360184	OK	0.195931	0.144491	OK	0.0278374	0.820852	OK	KAT6A	-0.272202	0.124456	-2.18714	0.0287321	0.138018	OK	-0.0920946	0.122702	-0.750557	0.452919	0.782608	OK
ENSG00000083223.18	328	351	345	482	342	327	318	181	290	462	270	353	314	263	340	383	404	358	0.187916	0.220241	OK	0.203019	0.387439	OK	0.714996	4.73126e-05	OK	TUT7	-0.0907033	0.141283	-0.641999	0.520874	0.765577	OK	0.187971	0.175477	1.0712	0.28408	0.645281	OK
ENSG00000083290.20	200	204	170	264	160	157	186	134	206	252	147	195	194	137	157	211	177	178	0.319814	0.107841	OK	0.0337499	0.878647	OK	0.453013	0.0475088	OK	ULK2	0.00193448	0.214312	0.00902647	0.992798	0.997603	OK	-0.195487	0.204009	-0.958229	0.337948	0.696732	OK
ENSG00000083312.17	1684	1782	1759	2582	1588	1435	1666	1100	1668	2548	1208	1722	1555	1418	1767	1696	1201	1320	0.391814	0.000172885	OK	0.0955482	0.573629	OK	-0.0293731	0.826237	OK	TNPO1	0.0475683	0.15972	0.297822	0.765839	0.903046	OK	-0.399238	0.133864	-2.98241	0.00285984	0.0360797	OK
ENSG00000083444.17	5348	9048	9029	5391	5878	6631	7259	7636	11953	9373	7369	11440	8283	12098	14752	7614	9831	10683	-0.0552019	0.870161	OK	0.0144512	0.931878	OK	-0.069822	0.715456	OK	PLOD1	0.546898	0.197162	2.77385	0.00553978	0.0424663	OK	0.591061	0.208119	2.84002	0.00451104	0.0515168	OK
ENSG00000083454.22	51	50	62	48	39	29	142	53	94	115	67	95	84	53	72	60	45	49	-0.178828	0.651662	OK	-0.140196	0.661556	OK	-0.228365	0.480888	OK	P2RX5	1.03338	0.336156	3.07412	0.00211124	0.0200781	OK	0.231991	0.379106	0.611942	0.540576	0.83797	OK
ENSG00000083457.12	143	148	121	114	68	78	127	78	143	150	79	110	172	117	133	122	69	85	-0.388086	0.0790855	OK	-0.10126	0.650924	OK	-0.390835	0.142389	OK	ITGAE	0.319329	0.236674	1.34924	0.177261	0.434634	OK	0.0749445	0.27014	0.277429	0.781451	0.939345	OK
ENSG00000083520.15	590	698	649	556	352	335	538	425	657	580	313	420	627	564	795	415	332	338	-0.322544	0.00977679	OK	-0.297115	0.0254846	OK	-0.53171	7.43547e-05	OK	DIS3	0.0315797	0.140571	0.224653	0.822249	0.929843	OK	-0.170807	0.149177	-1.14499	0.252212	0.613218	OK
ENSG00000083535.16	156	135	152	184	140	157	123	109	205	171	103	138	172	145	176	141	116	131	0.337004	0.106895	OK	0.0416467	0.873088	OK	0.00757497	0.970518	OK	PIBF1	0.0333189	0.240353	0.138625	0.889747	0.960614	OK	-0.178885	0.215246	-0.831071	0.405933	0.749096	OK
ENSG00000083544.14	128	165	132	184	128	123	97	70	138	142	86	126	142	93	138	166	127	106	0.248774	0.213765	OK	0.152202	0.512944	OK	0.35168	0.139262	OK	TDRD3	-0.304772	0.207816	-1.46655	0.142499	0.386876	OK	-0.011585	0.221174	-0.0523797	0.958226	0.990062	OK
ENSG00000083635.8	103	122	102	124	74	59	86	79	107	94	57	73	111	87	92	89	71	61	-0.127606	0.610451	OK	-0.354137	0.168499	OK	-0.166112	0.531998	OK	NUFIP1	-0.179108	0.271862	-0.658821	0.510011	0.758247	OK	-0.133606	0.277159	-0.482056	0.629766	0.883735	OK
ENSG00000083642.19	285	348	383	282	228	194	304	235	369	325	190	275	306	263	350	281	234	258	-0.0191941	0.921798	OK	-0.240501	0.157626	OK	0.190639	0.230519	OK	PDS5B	-0.0133876	0.178964	-0.0748061	0.940369	0.977897	OK	0.224155	0.177836	1.26046	0.207504	0.564672	OK
ENSG00000083720.13	404	355	334	431	240	236	369	254	390	439	275	329	337	251	325	321	230	237	0.0739341	0.657953	OK	0.134312	0.367779	OK	0.106517	0.576045	OK	OXCT1	0.56766	0.149266	3.80301	0.000142951	0.00228896	OK	-0.204441	0.181621	-1.12565	0.260315	0.621874	OK
ENSG00000083750.12	170	148	118	201	122	117	96	78	112	150	82	128	162	137	163	176	140	142	0.26806	0.23198	OK	0.583467	0.0287475	OK	0.0205667	0.935478	OK	RRAGB	-0.0387474	0.248145	-0.156148	0.875916	0.953744	OK	0.0714184	0.234628	0.30439	0.760831	0.931705	OK
ENSG00000083782.8	14	14	12	15	8	9	12	11	20	12	11	15	25	26	18	31	10	7	-0.0880992	0.888367	OK	-0.225094	0.720351	OK	-0.192314	0.746246	OK	EPYC	0.376201	0.650875	0.577993	0.563269	0.792556	OK	0.752899	0.673277	1.11826	0.263456	0.624992	OK
ENSG00000083799.17	858	882	826	1482	939	827	814	569	795	912	448	695	738	582	790	707	500	541	0.868974	3.87558e-11	OK	0.00815603	0.959198	OK	0.266974	0.0402718	OK	CYLD	-0.895688	0.123969	-7.22507	5.00834e-13	4.06912e-11	OK	-0.939406	0.134169	-7.00166	2.5295e-12	2.85833e-10	OK
ENSG00000083807.10	17	16	15	22	15	14	21	11	9	21	8	21	16	17	15	17	18	14	0.422089	0.42864	OK	0.361437	0.558212	OK	0.361307	0.515911	OK	SLC27A5	-0.0535947	0.54503	-0.0983335	0.921667	0.971178	OK	-0.0195336	0.539815	-0.0361857	0.971134	0.993815	OK
ENSG00000083812.12	119	140	131	164	106	127	124	86	134	216	136	187	147	118	147	178	192	150	0.30049	0.185855	OK	0.431123	0.0963488	OK	0.562587	0.0242243	OK	ZNF324	0.310498	0.209895	1.4793	0.139061	0.382859	OK	0.387748	0.253563	1.5292	0.126216	0.445941	OK
ENSG00000083814.13	47	52	41	52	39	31	43	36	59	55	43	60	53	35	51	40	49	37	0.0133697	0.96887	OK	0.155125	0.64933	OK	0.119047	0.742401	OK	ZNF671	0.37985	0.349542	1.08671	0.277167	0.555346	OK	0.112043	0.368017	0.304451	0.760785	0.931705	OK
ENSG00000083817.9	55	66	65	65	52	45	47	30	53	62	43	61	38	42	65	53	48	48	0.0642953	0.829515	OK	0.307542	0.348084	OK	0.2807	0.403244	OK	ZNF416	-0.00992942	0.311417	-0.0318847	0.974564	0.990511	OK	-0.127055	0.314324	-0.404218	0.686053	0.904524	OK
ENSG00000083828.16	62	71	63	84	64	71	72	40	77	118	88	94	65	51	71	90	79	77	0.464793	0.087541	OK	0.518139	0.0614124	OK	0.661128	0.0195621	OK	ZNF586	0.339752	0.267784	1.26875	0.20453	0.471623	OK	0.258906	0.26992	0.959193	0.337462	0.696716	OK
ENSG00000083838.16	68	101	99	135	91	86	85	68	82	177	103	105	94	55	80	132	141	117	0.365028	0.144674	OK	0.545161	0.0391641	OK	0.956287	0.000166884	OK	ZNF446	0.259745	0.243508	1.06668	0.286116	0.564596	OK	0.404082	0.21924	1.8431	0.0653143	0.306633	OK
ENSG00000083844.10	224	278	246	367	250	225	173	140	199	286	153	226	248	200	245	239	256	256	0.716725	2.62133e-05	OK	0.521379	0.00685117	OK	0.183749	0.529826	OK	ZNF264	-0.577552	0.176725	-3.26809	0.00108277	0.0119962	OK	-0.212948	0.209886	-1.01459	0.310302	0.672778	OK
ENSG00000083845.9	2645	2963	2666	2776	2082	2115	2750	2069	3017	3275	2181	2950	2486	2539	2950	2478	2368	2522	0.01986	0.827765	OK	0.0110012	0.910528	OK	0.0985974	0.333037	OK	RPS5	0.185434	0.109332	1.69606	0.0898751	0.2927	OK	0.0497556	0.111074	0.447949	0.65419	0.89436	OK
ENSG00000083857.14	8227	8453	8440	7330	3909	4569	7939	5415	9293	8687	4438	6698	10703	10314	12557	6891	5664	5828	-0.319654	0.00199211	OK	-0.294147	0.00209962	OK	-0.472441	1.09474e-05	OK	FAT1	0.105972	0.113299	0.935332	0.349617	0.628956	OK	0.320436	0.120283	2.66401	0.00772157	0.0761582	OK
ENSG00000083896.12	385	439	406	536	395	396	371	280	444	593	338	469	415	393	510	464	443	441	0.353173	0.0116326	OK	0.28655	0.0282648	OK	0.326241	0.0191699	OK	YTHDC1	0.0640029	0.138759	0.461252	0.644618	0.840995	OK	0.121342	0.148283	0.818311	0.413179	0.752764	OK
ENSG00000083937.9	389	374	463	596	399	371	304	246	413	505	313	419	377	323	458	511	355	382	0.378664	0.00930813	OK	0.312734	0.0315347	OK	0.357487	0.0096143	OK	CHMP2B	-0.120347	0.137648	-0.874312	0.381948	0.658118	OK	-0.0314475	0.139205	-0.225909	0.821273	0.952508	OK
ENSG00000084070.12	290	317	308	228	140	185	265	234	290	323	171	238	340	298	344	230	194	226	-0.508513	0.00275775	OK	-0.191918	0.251645	OK	-0.43471	0.0062591	OK	SMAP2	0.368567	0.181129	2.03484	0.0418672	0.178162	OK	0.264991	0.186312	1.42229	0.154941	0.496249	OK
ENSG00000084072.16	160	163	164	146	100	107	163	98	173	182	97	167	199	165	169	147	125	136	-0.227002	0.253056	OK	-0.0729848	0.724036	OK	-0.195937	0.329266	OK	PPIE	0.274921	0.213511	1.28762	0.197878	0.463428	OK	0.220029	0.210889	1.04334	0.296792	0.657578	OK
ENSG00000084073.9	692	702	685	786	442	450	521	380	642	660	310	478	711	596	788	698	452	503	-0.0629731	0.617212	OK	-0.156755	0.239604	OK	-0.111266	0.418793	OK	ZMPSTE24	-0.241329	0.144305	-1.67235	0.0944545	0.302117	OK	0.00537922	0.155436	0.0346073	0.972393	0.994005	OK
ENSG00000084090.13	1116	1312	1162	1057	656	723	871	643	958	934	469	781	1202	970	1250	969	708	781	-0.357997	0.00054252	OK	-0.34564	0.00292599	OK	-0.318338	0.0129415	OK	STARD7	-0.238814	0.125652	-1.9006	0.0573546	0.21865	OK	-0.00703947	0.12822	-0.0549014	0.956217	0.989303	OK
ENSG00000084092.7	245	270	237	254	229	195	216	153	180	317	181	228	219	206	221	256	226	201	0.122351	0.488003	OK	0.277675	0.136526	OK	0.273622	0.116793	OK	NOA1	0.00353611	0.184384	0.0191779	0.984699	0.994124	OK	-0.0317936	0.189039	-0.168185	0.866438	0.965731	OK
ENSG00000084093.17	1161	1201	1345	1109	696	707	978	719	1205	1288	659	982	1261	1159	1526	1158	925	1058	-0.317608	0.00697218	OK	-0.0344122	0.765288	OK	-0.129486	0.346764	OK	REST	0.21391	0.133601	1.60111	0.109353	0.331392	OK	0.431889	0.150545	2.86884	0.00411978	0.0479592	OK
ENSG00000084112.15	2185	2374	2459	3287	1981	2485	1550	1107	1842	2729	1331	2268	2523	2380	3069	3113	2346	2977	0.347099	0.00341138	OK	0.416664	0.00053213	OK	0.305668	0.0181118	OK	SSH1	-0.330992	0.124998	-2.64797	0.00809776	0.0557733	OK	0.162839	0.144125	1.12984	0.258544	0.620919	OK
ENSG00000084207.17	2727	2725	2442	2658	1742	1815	2629	2086	3087	2962	1910	2793	2658	2541	2947	2491	2302	2433	0.0048708	0.96085	OK	-0.158281	0.0911357	OK	0.0573646	0.57489	OK	GSTP1	0.17916	0.103385	1.73294	0.083107	0.277557	OK	0.183357	0.112132	1.63519	0.102009	0.395717	OK
ENSG00000084234.17	13135	15680	16567	13533	9787	11165	8882	7183	11736	10771	6185	9757	17249	15792	21717	14846	12175	14248	-0.109995	0.355885	OK	-0.0953802	0.334828	OK	-0.114442	0.232268	OK	APLP2	-0.426449	0.112767	-3.78169	0.000155768	0.00247014	OK	0.292518	0.115714	2.52794	0.0114733	0.0997297	OK
ENSG00000084444.14	99	108	102	97	80	77	70	64	135	100	64	109	83	106	139	100	73	103	-0.0455141	0.851038	OK	0.013985	0.961876	OK	-0.0115034	0.965647	OK	FAM234B	0.102579	0.272061	0.377044	0.706141	0.87147	OK	0.106694	0.26354	0.40485	0.685588	0.904524	OK
ENSG00000084463.8	706	779	814	806	540	587	691	543	852	816	438	756	815	720	1000	724	643	665	0.075843	0.558361	OK	-0.129239	0.474848	OK	-0.0271086	0.841835	OK	WBP11	0.0368799	0.192774	0.191311	0.848282	0.940614	OK	0.103775	0.149855	0.692501	0.488623	0.805114	OK
ENSG00000084623.11	1319	1443	1280	1368	910	957	1124	771	1145	1392	757	1051	1160	1085	1364	964	953	1010	-0.0873741	0.366824	OK	-0.0252631	0.808257	OK	-0.0247205	0.820782	OK	EIF3I	-0.0758768	0.109881	-0.690536	0.489857	0.742971	OK	-0.0983038	0.118604	-0.828841	0.407194	0.749157	OK
ENSG00000084636.18	182	168	137	173	105	135	129	106	177	138	93	155	226	222	245	208	159	166	0.174187	0.434256	OK	0.368116	0.203315	OK	-0.379405	0.0542452	OK	COL16A1	0.200093	0.270447	0.739862	0.459384	0.72008	OK	0.0932976	0.237546	0.392756	0.694499	0.907085	OK
ENSG00000084652.16	1291	1247	1178	1231	719	773	1150	745	1139	1331	645	844	1291	1010	1356	1041	754	723	-0.202078	0.0605837	OK	-0.208459	0.102587	OK	-0.314525	0.0187339	OK	TXLNA	-0.0329755	0.133604	-0.246815	0.805051	0.921974	OK	-0.118628	0.139794	-0.848587	0.396111	0.741323	OK
ENSG00000084676.15	507	544	493	737	455	423	377	283	445	580	322	465	473	405	456	508	464	431	0.219259	0.0970055	OK	0.233365	0.0773048	OK	0.305075	0.0526533	OK	NCOA1	-0.28819	0.138401	-2.08228	0.0373172	0.165099	OK	-0.150475	0.152247	-0.988365	0.322974	0.684168	OK
ENSG00000084693.16	383	448	350	436	310	277	234	222	325	358	228	283	320	294	335	279	226	227	-0.00119199	0.993285	OK	0.112966	0.519942	OK	-0.166292	0.286043	OK	AGBL5	-0.281968	0.154839	-1.82104	0.0686011	0.244693	OK	-0.536057	0.157545	-3.40257	0.000667552	0.0115592	OK
ENSG00000084710.14	60	77	74	45	18	14	84	44	64	60	22	32	109	71	88	51	17	29	-1.26578	0.00104924	OK	-0.746843	0.0358378	OK	-1.23489	0.00121243	OK	EFR3B	0.651641	0.457477	1.42442	0.154324	0.406323	OK	0.416667	0.513912	0.810776	0.417494	0.756969	OK
ENSG00000084731.15	966	969	767	1737	959	931	1020	734	981	1534	838	1142	978	844	939	1269	894	1023	0.556613	0.000312717	OK	0.272583	0.0448668	OK	0.257082	0.168318	OK	KIF3C	0.0866624	0.147501	0.587539	0.556842	0.788005	OK	-0.0952005	0.156802	-0.607137	0.54376	0.84046	OK
ENSG00000084733.11	1498	1614	1636	1714	1039	1068	1156	878	1390	1572	845	1180	1544	1283	1719	1437	1092	1160	0.0758481	0.425319	OK	0.158361	0.135987	OK	0.175955	0.100474	OK	RAB10	0.00754541	0.104168	0.0724349	0.942256	0.9781	OK	0.204657	0.110611	1.85024	0.064279	0.303814	OK
ENSG00000084754.12	1771	1823	1699	1816	1188	1150	1572	1015	1635	1879	980	1492	1674	1425	1768	1510	1251	1215	-0.116763	0.202484	OK	-0.0253516	0.801657	OK	-0.0522385	0.613644	OK	HADHA	0.0237441	0.10581	0.224404	0.822443	0.929982	OK	-0.039872	0.109974	-0.362558	0.716935	0.915592	OK
ENSG00000084764.12	306	326	321	294	225	275	301	251	351	330	233	304	306	255	299	295	251	269	-0.00457995	0.980081	OK	-0.0516436	0.751953	OK	0.10561	0.495203	OK	MAPRE3	0.0996621	0.189113	0.526998	0.598195	0.815394	OK	-0.0445039	0.18565	-0.239719	0.810548	0.949039	OK
ENSG00000084774.14	504	492	569	451	288	279	569	343	588	644	272	391	487	463	612	378	274	289	-0.358071	0.0234067	OK	-0.255988	0.191188	OK	-0.44015	0.0202815	OK	CAD	0.496618	0.184306	2.69453	0.00704885	0.0506978	OK	0.186862	0.197039	0.948352	0.34295	0.702186	OK
ENSG00000085063.16	6306	7423	6947	7297	4981	5479	4916	3721	6091	6240	3692	5559	6360	5838	8198	5603	5101	5994	0.125815	0.16523	OK	0.0248008	0.794578	OK	0.06336	0.568016	OK	CD59	-0.162752	0.10507	-1.54898	0.121386	0.352067	OK	0.0101235	0.119793	0.0845082	0.932652	0.983588	OK
ENSG00000085117.12	606	595	513	689	448	398	644	364	491	794	351	482	337	271	365	319	225	264	-0.0165793	0.927633	OK	0.254703	0.174019	OK	-0.206046	0.270704	OK	CD82	-0.0132941	0.1951	-0.0681401	0.945674	0.979093	OK	-0.767928	0.213111	-3.60342	0.000314062	0.00626594	OK
ENSG00000085185.15	393	365	384	263	207	187	316	205	291	253	156	217	425	300	416	251	237	254	-0.5413	0.000990885	OK	-0.43071	0.0186451	OK	-0.300377	0.0701367	OK	BCORL1	-0.133077	0.188662	-0.705373	0.480578	0.735604	OK	0.145279	0.1825	0.796052	0.426002	0.762982	OK
ENSG00000085224.22	1320	1280	1226	1433	935	886	1161	852	1287	1398	768	1060	1156	941	1235	958	798	826	0.120061	0.277579	OK	0.0460638	0.682293	OK	-0.0132624	0.901924	OK	ATRX	-0.0185946	0.118219	-0.157289	0.875017	0.953482	OK	-0.172002	0.121205	-1.4191	0.15587	0.497842	OK
ENSG00000085231.14	76	86	92	69	68	51	67	54	96	63	33	52	85	77	110	63	72	80	-0.411896	0.156203	OK	-0.558793	0.0982514	OK	-0.207455	0.480701	OK	AK6	-0.256925	0.351932	-0.730041	0.465365	0.724163	OK	0.401126	0.326822	1.22735	0.21969	0.577493	OK
ENSG00000085274.15	174	161	164	164	136	104	112	83	165	182	93	145	157	174	183	142	132	136	0.0702171	0.733701	OK	0.288274	0.200892	OK	-0.0458531	0.828213	OK	MYNN	-0.0447699	0.214076	-0.209131	0.834346	0.934973	OK	0.0472367	0.21745	0.21723	0.828029	0.953921	OK
ENSG00000085276.19	115	187	125	176	117	116	141	128	206	260	165	199	133	106	134	129	117	121	0.237867	0.310893	OK	0.0842783	0.68733	OK	0.232161	0.286547	OK	MECOM	0.317486	0.200794	1.58115	0.113843	0.33924	OK	-0.34182	0.223323	-1.53061	0.125866	0.445063	OK
ENSG00000085365.18	457	488	576	559	301	339	368	356	564	546	272	448	513	414	538	455	274	308	-0.0953292	0.540542	OK	-0.208754	0.134091	OK	-0.388818	0.00859293	OK	SCAMP1	-0.0150367	0.147861	-0.101695	0.918999	0.970075	OK	-0.231328	0.162418	-1.42428	0.154367	0.495576	OK
ENSG00000085377.14	510	572	517	444	345	358	343	335	443	436	255	416	590	487	687	513	480	449	-0.154919	0.273177	OK	-0.0497732	0.768154	OK	0.033887	0.805933	OK	PREP	-0.0669604	0.160183	-0.418025	0.675929	0.856923	OK	0.3965	0.158071	2.50837	0.012129	0.103778	OK
ENSG00000085382.12	158	180	148	178	114	118	148	112	154	168	111	138	163	162	201	185	107	138	0.0943112	0.697722	OK	-0.137762	0.518313	OK	-0.0879838	0.684376	OK	HACE1	-0.195171	0.233864	-0.834549	0.403972	0.67669	OK	-0.25408	0.247314	-1.02736	0.304252	0.666577	OK
ENSG00000085415.16	456	415	494	482	297	273	388	257	421	394	187	288	440	400	534	411	324	344	-0.15012	0.326116	OK	-0.314627	0.050492	OK	-0.104205	0.46057	OK	SEH1L	-0.211435	0.156952	-1.34713	0.177939	0.435404	OK	0.092401	0.15829	0.583745	0.559392	0.847622	OK
ENSG00000085433.15	427	367	355	390	268	224	308	237	389	357	195	272	325	274	375	265	243	235	-0.117792	0.46774	OK	-0.258508	0.0950588	OK	-0.150114	0.327198	OK	WDR47	-0.162595	0.159808	-1.01743	0.308947	0.588049	OK	-0.253979	0.163992	-1.54873	0.121446	0.43719	OK
ENSG00000085449.15	1416	1546	1572	1782	1092	1106	946	813	1232	1425	796	1152	1406	1168	1496	1232	934	1010	0.0928094	0.358689	OK	0.273549	0.00960505	OK	-0.121334	0.258089	OK	WDFY1	-0.146487	0.111296	-1.3162	0.188107	0.449862	OK	-0.266279	0.117651	-2.2633	0.0236175	0.164407	OK
ENSG00000085491.17	553	599	584	580	402	393	497	357	581	651	317	502	702	616	818	643	466	497	-0.112889	0.352728	OK	-0.0319338	0.805853	OK	-0.196403	0.122299	OK	SLC25A24	0.069674	0.137546	0.506549	0.612471	0.824194	OK	0.25146	0.140743	1.78666	0.073993	0.328891	OK
ENSG00000085511.20	368	391	421	480	322	316	312	238	361	402	221	321	468	437	544	375	330	342	0.191752	0.299435	OK	-0.143382	0.385643	OK	-0.293391	0.0394541	OK	MAP3K4	-0.468825	0.155992	-3.00544	0.00265195	0.0238748	OK	-0.150678	0.161673	-0.931993	0.35134	0.709214	OK
ENSG00000085644.14	188	237	222	136	107	86	177	128	213	169	122	167	206	220	240	171	143	139	-0.752067	0.000211511	OK	-0.390985	0.0455648	OK	-0.332882	0.0824713	OK	ZNF213	0.388368	0.22347	1.73789	0.0822294	0.275887	OK	0.468971	0.222192	2.11066	0.0348016	0.210221	OK
ENSG00000085662.14	1198	1217	900	1341	841	736	726	498	649	830	416	547	727	552	736	675	486	500	0.0217178	0.876776	OK	-0.145017	0.296604	OK	-0.0289332	0.846148	OK	AKR1B1	-0.714287	0.141016	-5.06529	4.07777e-07	1.34853e-05	OK	-0.762366	0.152566	-4.99696	5.82419e-07	2.86782e-05	OK
ENSG00000085719.13	968	1010	967	1000	555	518	750	563	908	813	394	675	799	738	877	701	446	480	-0.309583	0.0304444	OK	-0.318456	0.0119751	OK	-0.441392	0.00232359	OK	CPNE3	-0.105967	0.159268	-0.665338	0.505834	0.755272	OK	-0.322348	0.175115	-1.84078	0.0656545	0.307135	OK
ENSG00000085721.12	512	451	432	552	339	362	386	282	452	496	323	396	431	355	473	418	369	373	0.0474156	0.757485	OK	0.098622	0.490407	OK	0.185251	0.172296	OK	RRN3	-0.0557321	0.14998	-0.371596	0.710194	0.874504	OK	-0.036157	0.148888	-0.242846	0.808124	0.948998	OK
ENSG00000085733.16	3757	4247	4081	4097	2587	3046	3199	2192	3457	3690	2010	2994	4243	3614	4660	3685	2934	3386	0.0248022	0.800994	OK	-0.0642608	0.480945	OK	-0.0598584	0.549095	OK	CTTN	-0.266486	0.111994	-2.37947	0.0173374	0.0971453	OK	-0.0142172	0.118641	-0.119834	0.904615	0.975781	OK
ENSG00000085741.13	29	30	21	44	7	8	53	27	52	77	46	53	31	30	23	33	39	10	-0.196281	0.773852	OK	0.547834	0.131849	OK	0.625768	0.233708	OK	WNT11	1.69714	0.581981	2.91614	0.00354389	0.0302494	OK	1.02425	0.700369	1.46244	0.14362	0.478021	OK
ENSG00000085760.15	150	187	173	199	141	128	145	84	171	224	118	181	174	129	197	139	141	99	0.111941	0.56058	OK	0.462915	0.0348622	OK	-0.191737	0.416498	OK	MTIF2	0.289229	0.206488	1.40071	0.161302	0.414963	OK	-0.306719	0.232728	-1.31793	0.187527	0.53872	OK
ENSG00000085788.14	497	536	526	477	305	343	452	388	702	538	362	452	586	534	735	437	361	385	-0.123318	0.442574	OK	-0.459328	0.00598259	OK	-0.332227	0.117357	OK	DDHD2	0.232933	0.172627	1.34935	0.177226	0.434634	OK	0.215904	0.203479	1.06106	0.288662	0.650113	OK
ENSG00000085832.17	588	662	641	653	405	425	444	334	538	518	290	443	576	488	686	500	387	439	-0.15519	0.207751	OK	-0.0811099	0.54566	OK	-0.165244	0.226715	OK	EPS15	-0.199293	0.136596	-1.45899	0.144567	0.390076	OK	-0.0159655	0.141032	-0.113205	0.909868	0.976745	OK
ENSG00000085840.13	21	20	24	24	10	18	30	24	34	36	22	30	7	7	22	9	9	14	-0.0808699	0.874842	OK	-0.0880369	0.829896	OK	0.10851	0.880483	OK	ORC1	0.706285	0.476081	1.48354	0.137931	0.380997	OK	-0.680931	0.614067	-1.10889	0.267479	0.629464	OK
ENSG00000085871.9	108	107	83	105	69	76	99	79	79	166	86	100	118	77	96	126	87	93	0.0193698	0.936179	OK	0.280673	0.281049	OK	0.301995	0.245047	OK	MGST2	0.360394	0.245169	1.46998	0.141566	0.385696	OK	0.288335	0.248309	1.16119	0.245564	0.607479	OK
ENSG00000085872.15	629	690	643	585	487	443	610	453	663	582	382	488	667	554	743	518	437	522	-0.111418	0.482449	OK	-0.410065	0.00196212	OK	-0.153197	0.329968	OK	CHERP	-0.17693	0.169622	-1.04308	0.296909	0.576107	OK	-0.0557175	0.189141	-0.294582	0.768313	0.934921	OK
ENSG00000085978.22	246	311	261	231	147	125	238	189	228	258	112	143	257	195	295	204	160	153	-0.0612632	0.787678	OK	-0.308319	0.23599	OK	-0.435042	0.0143478	OK	ATG16L1	-0.20188	0.295313	-0.683614	0.494219	0.746608	OK	-0.329133	0.246238	-1.33664	0.181339	0.531234	OK
ENSG00000085982.13	661	626	612	744	446	412	540	366	595	570	280	420	607	589	772	547	409	395	-0.093306	0.530168	OK	-0.328164	0.0183547	OK	-0.100378	0.627312	OK	USP40	-0.30684	0.150392	-2.04027	0.0413235	0.176591	OK	-0.0724358	0.198361	-0.365171	0.714984	0.915324	OK
ENSG00000085998.14	1061	1179	1008	1120	641	728	1093	662	1016	1210	579	840	1159	974	1195	953	747	784	-0.120988	0.285637	OK	-0.216369	0.114756	OK	-0.222748	0.0512763	OK	POMGNT1	-0.0422304	0.132517	-0.31868	0.749969	0.897303	OK	-0.0675644	0.125217	-0.539577	0.589489	0.865191	OK
ENSG00000085999.13	23	39	31	30	24	26	51	22	44	51	18	34	23	23	36	12	19	27	0.628023	0.175973	OK	-0.0634891	0.886383	OK	-1.72223	0.00235023	OK	RAD54L	-0.415579	0.485573	-0.855853	0.392079	0.66622	OK	-1.41708	0.526023	-2.69396	0.00706091	0.0711409	OK
ENSG00000086015.21	556	595	553	854	476	520	451	245	397	596	337	418	648	529	618	551	494	496	0.358922	0.00630354	OK	0.326306	0.0529363	OK	0.0188727	0.888234	OK	MAST2	-0.385128	0.146594	-2.62717	0.00860986	0.0585649	OK	-0.260613	0.144907	-1.79849	0.0721001	0.324104	OK
ENSG00000086061.16	2146	2397	2145	3824	3274	2724	1746	1213	1901	2979	2150	2452	1954	1542	2104	3425	3714	2953	0.826231	1.69438e-12	OK	0.610581	1.55265e-07	OK	1.1066	7.67896e-19	OK	DNAJA1	-0.3949	0.138227	-2.85689	0.00427809	0.0351025	OK	0.0596792	0.144625	0.412647	0.679865	0.902706	OK
ENSG00000086062.12	4240	4473	4254	6531	4546	4452	4233	2999	4463	5259	2929	4136	4229	3692	4479	4084	3102	3432	0.513586	7.95989e-11	OK	-0.0191809	0.811763	OK	-0.0103167	0.914992	OK	B4GALT1	-0.399954	0.0887963	-4.50418	6.66298e-06	0.000155769	OK	-0.556517	0.102944	-5.40604	6.44351e-08	4.02198e-06	OK
ENSG00000086065.14	362	477	440	534	336	338	349	278	418	453	272	428	414	377	466	392	357	376	0.145532	0.306588	OK	0.0798049	0.578431	OK	0.0826874	0.549007	OK	CHMP5	-0.0704063	0.14455	-0.487074	0.626206	0.831287	OK	-0.0277025	0.144507	-0.191704	0.847974	0.959203	OK
ENSG00000086102.19	434	472	459	508	377	403	346	255	429	488	259	441	512	351	570	491	434	478	0.302744	0.0323956	OK	0.187461	0.202169	OK	0.253816	0.0870912	OK	NFX1	-0.213098	0.155308	-1.3721	0.170032	0.426278	OK	0.0464419	0.150822	0.307925	0.758139	0.931008	OK
ENSG00000086189.10	167	156	156	149	74	88	163	101	152	134	75	112	180	107	167	113	78	66	-0.304413	0.204746	OK	-0.441162	0.0519628	OK	-0.554027	0.0738157	OK	DIMT1	-0.0140299	0.262511	-0.053445	0.957377	0.983915	OK	-0.236484	0.335812	-0.704215	0.481299	0.80003	OK
ENSG00000086200.16	220	217	201	207	110	125	160	127	188	205	87	141	187	198	239	145	108	119	-0.516819	0.0113449	OK	0.111719	0.664018	OK	-0.416053	0.0823839	OK	IPO11	0.29271	0.265179	1.10382	0.26967	0.546482	OK	-0.00462957	0.245905	-0.0188267	0.984979	0.996766	OK
ENSG00000086232.13	1292	1294	1163	1224	744	730	1226	829	1468	1395	745	1154	1071	962	1210	923	800	813	-0.286635	0.0146069	OK	0.108013	0.399122	OK	-0.24046	0.111495	OK	EIF2AK1	0.518192	0.128929	4.0192	5.83961e-05	0.00105289	OK	-0.0551923	0.159336	-0.346389	0.72905	0.91853	OK
ENSG00000086289.12	55	42	46	80	31	32	122	59	77	198	87	102	42	30	18	74	43	31	0.081645	0.831249	OK	0.468102	0.108353	OK	0.889245	0.0521567	OK	EPDR1	1.4112	0.317038	4.45121	8.53866e-06	0.000194103	OK	0.0963684	0.405127	0.237872	0.81198	0.94926	OK
ENSG00000086475.15	442	481	478	448	309	290	331	299	388	457	224	360	369	360	445	341	271	296	-0.172178	0.247509	OK	0.259171	0.161447	OK	0.165561	0.259082	OK	SEPHS1	0.154998	0.16774	0.924034	0.355469	0.634311	OK	0.112043	0.155789	0.719196	0.47202	0.795173	OK
ENSG00000086504.17	440	508	446	384	232	275	345	277	400	351	231	301	444	397	424	337	318	281	-0.429839	0.00250895	OK	-0.324791	0.0398471	OK	-0.274095	0.0838012	OK	MRPL28	-0.0561392	0.162932	-0.344556	0.730428	0.886237	OK	0.0604362	0.162906	0.370988	0.710647	0.913384	OK
ENSG00000086544.3	206	228	224	593	425	395	263	184	214	625	369	493	294	176	256	581	542	478	1.35661	1.42584e-21	OK	1.05705	6.97543e-11	OK	1.35114	2.9272e-14	OK	ITPKC	-0.00256262	0.132149	-0.0193919	0.984528	0.994124	OK	0.154975	0.138132	1.12193	0.261891	0.62325	OK
ENSG00000086589.12	371	390	378	453	301	308	307	255	348	440	284	329	407	348	458	393	359	341	0.165871	0.220774	OK	0.0922923	0.542384	OK	0.0303561	0.828769	OK	RBM22	-0.0962781	0.151606	-0.635056	0.525392	0.767815	OK	-0.00129544	0.147302	-0.00879444	0.992983	0.99845	OK
ENSG00000086598.11	3173	3378	3443	3046	1879	2132	3359	2693	4334	3916	2159	3075	4048	3654	4642	3283	2499	2803	-0.217079	0.0319565	OK	-0.214805	0.0159718	OK	-0.200913	0.0303661	OK	TMED2	0.384134	0.104455	3.67751	0.000235519	0.00347913	OK	0.367828	0.114166	3.22186	0.00127359	0.0193221	OK
ENSG00000086619.14	44	50	39	54	38	34	46	33	65	65	32	33	65	68	65	47	41	45	0.119011	0.724569	OK	-0.211999	0.556472	OK	-1.03203	0.00685752	OK	ERO1B	0.0222929	0.362704	0.0614629	0.950991	0.981336	OK	0.148366	0.340877	0.435248	0.663382	0.896253	OK
ENSG00000086666.19	357	332	381	560	316	325	333	237	393	513	323	398	348	306	393	451	354	363	0.343863	0.023988	OK	0.291299	0.0501286	OK	0.396231	0.00478211	OK	ZFAND6	0.0542293	0.147666	0.367242	0.713438	0.87604	OK	0.0982153	0.144587	0.679281	0.49696	0.811051	OK
ENSG00000086712.13	229	247	216	337	226	222	196	167	231	297	135	217	198	134	219	191	195	194	0.467215	0.00259939	OK	0.0511516	0.779501	OK	0.336739	0.0882774	OK	TXLNG	-0.336826	0.172614	-1.95133	0.0510181	0.202764	OK	-0.424497	0.174449	-2.43336	0.0149595	0.119203	OK
ENSG00000086730.17	21	9	14	18	8	12	26	10	21	38	6	11	33	13	23	17	15	11	-0.0939776	0.879734	OK	-0.244667	0.698431	OK	-0.720765	0.215411	OK	LAT2	0.3944	0.671151	0.587648	0.556769	0.788005	OK	0.142115	0.608441	0.233572	0.815317	0.95023	OK
ENSG00000086758.16	2935	3296	2884	3190	1908	2003	2566	1698	2810	2936	1441	2215	2906	2767	3381	1890	1741	1744	-0.105398	0.245625	OK	-0.176663	0.128204	OK	-0.465667	1.37592e-05	OK	HUWE1	-0.247873	0.111433	-2.22442	0.0261205	0.129225	OK	-0.371756	0.109112	-3.4071	0.000656565	0.0114293	OK
ENSG00000086827.9	177	154	186	147	112	96	169	114	191	184	97	142	185	136	186	117	138	118	-0.13905	0.524152	OK	-0.2648	0.192013	OK	-0.229625	0.31566	OK	ZW10	0.125945	0.219238	0.574467	0.565652	0.793952	OK	-0.00310351	0.247793	-0.0125246	0.990007	0.99823	OK
ENSG00000086848.15	331	311	256	321	210	238	299	183	355	386	228	302	327	282	354	342	236	296	0.0550354	0.723671	OK	-0.00395273	0.98112	OK	0.309687	0.0919875	OK	ALG9	0.109187	0.17214	0.634291	0.525891	0.768147	OK	0.370899	0.193028	1.92148	0.0546717	0.277946	OK
ENSG00000086991.13	445	455	412	395	206	242	365	362	614	440	260	413	492	600	658	446	394	451	-0.371464	0.0168368	OK	-0.155179	0.280668	OK	-0.0616473	0.702165	OK	NOX4	0.51443	0.154107	3.33815	0.000843397	0.00980635	OK	0.844808	0.158791	5.32024	1.03629e-07	6.23102e-06	OK
ENSG00000087008.16	270	241	214	192	104	93	231	152	275	192	96	136	324	259	285	166	144	110	-0.757636	0.000128693	OK	-0.975099	2.47204e-06	OK	-0.952175	4.24315e-08	OK	ACOX3	0.0560036	0.235681	0.237624	0.812173	0.92476	OK	0.248088	0.224668	1.10424	0.269489	0.630989	OK
ENSG00000087053.18	1016	1025	983	1300	724	764	1153	798	1217	1544	747	1022	1182	915	1074	1051	747	720	0.122571	0.274523	OK	0.00287679	0.981076	OK	-0.118503	0.413839	OK	MTMR2	0.234413	0.130991	1.78954	0.073528	0.256229	OK	-0.124496	0.147466	-0.844237	0.398537	0.742681	OK
ENSG00000087074.8	741	816	767	8600	8147	7706	409	381	623	6835	5445	6993	747	687	967	5671	7836	6891	3.68078	2.12236e-173	OK	3.70285	4.47496e-131	OK	3.31062	2.62046e-99	OK	PPP1R15A	-0.424937	0.155603	-2.7309	0.00631609	0.046864	OK	-0.307206	0.175234	-1.75311	0.0795823	0.342134	OK
ENSG00000087076.9	172	129	122	164	85	102	76	42	66	105	31	59	172	98	123	173	105	116	-0.0509026	0.825941	OK	-0.0411846	0.900803	OK	0.161474	0.546987	OK	HSD17B14	-0.88918	0.288966	-3.07711	0.00209017	0.0199065	OK	0.150705	0.249751	0.603422	0.546228	0.842483	OK
ENSG00000087077.14	758	750	700	894	643	588	746	439	665	1044	587	756	622	574	615	721	577	610	0.154221	0.20603	OK	0.252832	0.0548328	OK	0.244388	0.0646279	OK	TRIP6	0.140138	0.126565	1.10724	0.268189	0.544636	OK	-0.149253	0.127793	-1.16793	0.242836	0.606373	OK
ENSG00000087086.15	11405	11405	9978	13843	8269	9110	9984	6291	10252	14284	7208	10382	13089	10538	13866	14112	10209	11788	0.176487	0.0500039	OK	0.16183	0.0994975	OK	0.174644	0.0983199	OK	FTL	-0.0639767	0.10096	-0.633683	0.526288	0.768642	OK	0.200052	0.110185	1.8156	0.0694319	0.316671	OK
ENSG00000087087.20	1058	1098	999	1089	708	700	1268	768	1164	1409	724	1042	931	894	1203	915	808	859	-0.146648	0.178531	OK	-0.0967384	0.442222	OK	0.158189	0.200276	OK	SRRT	0.329506	0.114767	2.87109	0.00409053	0.0338826	OK	0.212859	0.122285	1.74068	0.0817404	0.347874	OK
ENSG00000087088.20	561	581	469	650	448	436	640	397	594	829	479	571	477	456	513	542	452	463	-0.147506	0.388321	OK	0.194826	0.361344	OK	0.187907	0.182733	OK	BAX	0.432652	0.224377	1.92824	0.0538254	0.209663	OK	-0.0322563	0.167684	-0.192364	0.847457	0.959057	OK
ENSG00000087095.13	204	228	213	291	192	200	186	119	184	270	166	187	218	220	268	287	217	241	0.353287	0.0291486	OK	0.402526	0.0636518	OK	0.307402	0.0651411	OK	NLK	-0.0415306	0.20269	-0.204897	0.837652	0.936443	OK	0.11228	0.169664	0.66178	0.508112	0.81701	OK
ENSG00000087111.21	1023	1148	1152	964	714	755	1061	848	1266	1169	661	993	1250	1349	1511	1103	932	957	-0.160632	0.178427	OK	-0.259209	0.0146599	OK	-0.234409	0.0542308	OK	PIGS	0.174871	0.123775	1.41281	0.157712	0.410119	OK	0.287115	0.123519	2.32447	0.0201005	0.147441	OK
ENSG00000087152.15	975	1139	1013	1054	660	683	994	751	1058	1289	766	1062	1101	1068	1215	1109	990	965	-0.234621	0.0307946	OK	0.0891167	0.425627	OK	0.13453	0.272053	OK	ATXN7L3	0.352645	0.110848	3.18135	0.00146591	0.0151849	OK	0.456224	0.129579	3.52082	0.000430214	0.00820852	OK
ENSG00000087157.19	136	167	161	139	107	98	129	99	141	162	88	121	128	126	187	117	101	117	-0.0319805	0.899994	OK	-0.160701	0.519081	OK	-0.394581	0.0980047	OK	PGS1	-0.068707	0.256361	-0.268009	0.788693	0.914751	OK	-0.242799	0.257552	-0.942719	0.345824	0.704749	OK
ENSG00000087191.13	811	831	815	895	498	502	781	484	825	914	517	685	873	625	845	686	528	547	-0.0403321	0.752252	OK	0.016164	0.893475	OK	-0.201135	0.193089	OK	PSMC5	0.0621384	0.133944	0.463914	0.642709	0.840366	OK	-0.186737	0.148296	-1.25922	0.20795	0.565058	OK
ENSG00000087206.17	188	192	178	248	162	161	125	107	140	228	107	158	157	140	175	181	219	166	0.264257	0.20841	OK	0.35926	0.0843056	OK	0.602827	0.00680029	OK	UIMC1	-0.302482	0.186881	-1.61858	0.105537	0.323323	OK	-0.10455	0.208203	-0.502153	0.61556	0.877832	OK
ENSG00000087245.13	58786	65122	61513	61554	41358	44965	41538	32153	48417	53592	29932	44304	70222	66568	84761	65586	52351	59206	-0.0901657	0.209168	OK	-0.0422738	0.576584	OK	-0.107536	0.253204	OK	MMP2	-0.292089	0.0836587	-3.49143	0.000480436	0.00621552	OK	0.253483	0.0990434	2.55931	0.0104879	0.0938396	OK
ENSG00000087253.13	2581	2713	2740	2779	1608	1705	1837	1441	2296	2143	1148	1783	2893	2450	3345	2390	1791	2038	-0.125387	0.207279	OK	-0.182605	0.122082	OK	-0.108383	0.301783	OK	LPCAT2	-0.411701	0.123268	-3.33988	0.000838132	0.00976239	OK	0.193688	0.114736	1.68812	0.0913885	0.371679	OK
ENSG00000087263.17	508	497	540	406	246	257	515	341	548	487	232	327	543	483	615	349	265	286	-0.635264	1.32124e-05	OK	-0.233159	0.156365	OK	-0.600951	0.00196057	OK	OGFOD1	0.413852	0.175614	2.3566	0.018443	0.101695	OK	0.0822162	0.209817	0.391848	0.695171	0.907085	OK
ENSG00000087266.17	382	439	397	295	228	222	398	277	370	375	230	291	358	361	403	236	254	245	-0.149438	0.47807	OK	0.0125826	0.942921	OK	0.0050628	0.979243	OK	SH3BP2	0.199316	0.220485	0.903991	0.366	0.6443	OK	0.102654	0.234926	0.436961	0.66214	0.896253	OK
ENSG00000087269.16	383	448	477	427	253	235	365	276	433	423	201	310	393	322	475	323	248	289	-0.261987	0.0922957	OK	-0.294905	0.0485571	OK	-0.246288	0.105523	OK	NOP14	-0.0466781	0.164043	-0.284548	0.77599	0.908601	OK	-0.092434	0.165467	-0.558624	0.576419	0.857385	OK
ENSG00000087274.17	3158	3638	3163	3007	1929	1987	2466	1926	2995	2692	1467	2167	3421	3008	3781	2421	2136	2216	-0.116251	0.222221	OK	-0.33422	0.00146119	OK	-0.348448	0.0041281	OK	ADD1	-0.347683	0.105284	-3.30235	0.000958769	0.0108881	OK	-0.06072	0.126681	-0.479314	0.631715	0.884764	OK
ENSG00000087299.12	36	45	32	67	35	39	37	18	47	71	23	36	41	29	37	42	39	49	0.571878	0.179256	OK	0.0896522	0.847654	OK	0.597013	0.151812	OK	L2HGDH	-0.223074	0.45287	-0.492578	0.622311	0.829118	OK	0.0236538	0.399585	0.0591959	0.952796	0.987835	OK
ENSG00000087301.9	125	101	131	196	106	85	58	37	49	82	32	63	128	122	127	160	66	76	0.310612	0.207238	OK	0.0734382	0.833295	OK	-0.122417	0.682362	OK	TXNDC16	-1.21184	0.271537	-4.46291	8.08528e-06	0.000185398	OK	-0.375816	0.303439	-1.23852	0.215522	0.571779	OK
ENSG00000087302.9	642	801	651	706	446	465	615	416	693	765	417	637	664	597	734	676	562	568	-0.0587966	0.64913	OK	0.136016	0.268214	OK	0.192812	0.123711	OK	RTRAF	0.196005	0.128117	1.52989	0.126044	0.360025	OK	0.259233	0.131041	1.97826	0.0478998	0.257113	OK
ENSG00000087303.18	5372	5616	4862	5827	3283	3056	4903	3249	5216	5638	2642	4134	4002	3548	4376	3637	2377	2682	-0.0982755	0.370155	OK	-0.205934	0.0303736	OK	-0.17863	0.111433	OK	NID2	-0.0577611	0.122032	-0.473327	0.63598	0.836115	OK	-0.42097	0.135987	-3.09567	0.00196367	0.0274411	OK
ENSG00000087338.5	112	156	196	105	89	96	134	126	164	184	86	118	147	160	194	179	124	118	-0.581653	0.0593635	OK	-0.265096	0.220031	OK	0.220289	0.366082	OK	GMCL1	0.387839	0.243866	1.59038	0.11175	0.335789	OK	0.834639	0.266425	3.13273	0.00173188	0.0250017	OK
ENSG00000087365.16	2351	2462	2406	2257	1432	1507	1905	1314	2024	2172	1291	1848	2511	2195	2763	1976	1674	1762	-0.209316	0.0439962	OK	-0.074391	0.511544	OK	-0.238121	0.0200658	OK	SF3B2	-0.0903698	0.120726	-0.748556	0.454125	0.716175	OK	0.112183	0.115596	0.970475	0.33181	0.692573	OK
ENSG00000087448.11	1263	1157	1223	1102	665	707	1027	727	1197	916	441	677	1269	925	1193	920	692	663	-0.0597725	0.609516	OK	-0.226539	0.0571251	OK	-0.163564	0.191905	OK	KLHL42	-0.186964	0.135211	-1.38276	0.166739	0.422367	OK	-0.126369	0.130842	-0.965815	0.334137	0.694297	OK
ENSG00000087460.25	9940	10655	9924	10511	6946	7783	8996	7218	10920	11105	7262	10452	11801	11058	13777	10443	10427	10758	-0.0179439	0.812308	OK	0.00531958	0.959956	OK	0.0348083	0.731194	OK	GNAS	0.114379	0.105302	1.0862	0.277391	0.555541	OK	0.332697	0.105737	3.14647	0.00165255	0.024149	OK
ENSG00000087470.18	709	752	723	721	450	455	587	433	692	655	359	540	710	578	857	515	459	564	-0.115234	0.360296	OK	-0.299077	0.0270458	OK	-0.279362	0.047126	OK	DNM1L	-0.171472	0.147343	-1.16376	0.244521	0.518342	OK	-0.102935	0.156861	-0.656221	0.511682	0.81803	OK
ENSG00000087494.16	90	107	122	495	522	587	154	136	215	680	500	756	198	184	224	604	911	816	2.61485	3.55491e-31	OK	1.75305	1.62997e-21	OK	2.11906	9.50126e-24	OK	PTHLH	0.0682757	0.208427	0.327577	0.743232	0.893943	OK	0.430935	0.238245	1.80879	0.0704834	0.319562	OK
ENSG00000087502.18	653	711	758	652	364	373	557	429	753	585	341	475	729	613	847	621	390	448	-0.195354	0.199038	OK	-0.321271	0.0356538	OK	-0.0516701	0.757398	OK	ERGIC2	0.0588648	0.149972	0.392505	0.694685	0.866074	OK	0.222827	0.179504	1.24135	0.214477	0.571264	OK
ENSG00000087586.17	98	95	77	88	60	65	156	82	121	204	81	103	61	48	81	49	50	46	-0.0625838	0.807045	OK	0.103472	0.715052	OK	-0.390162	0.204177	OK	AURKA	0.825009	0.279483	2.95191	0.00315814	0.0275646	OK	-0.701084	0.296492	-2.36459	0.0180499	0.136447	OK
ENSG00000087589.16	60	52	32	25	11	8	84	40	72	66	24	29	58	50	51	41	14	16	-1.50757	0.00174232	OK	-0.826782	0.0248281	OK	-0.977329	0.0289075	OK	CASS4	1.37648	0.506755	2.71625	0.00660251	0.0483327	OK	0.710525	0.602659	1.17898	0.238405	0.600576	OK
ENSG00000087842.11	133	100	90	139	63	53	99	39	81	93	44	68	134	72	82	122	79	72	-0.0467776	0.873332	OK	-0.143762	0.649506	OK	0.121408	0.704946	OK	PIR	-0.379113	0.303956	-1.24726	0.212302	0.480619	OK	0.0748403	0.313917	0.238408	0.811565	0.949244	OK
ENSG00000087884.14	76	57	47	50	50	39	54	40	41	84	47	60	65	59	71	66	66	59	-0.100261	0.77374	OK	0.428399	0.187647	OK	0.243153	0.387688	OK	AAMDC	0.387429	0.323831	1.19639	0.231544	0.504649	OK	0.447018	0.321841	1.38894	0.164851	0.509758	OK
ENSG00000087903.13	38	46	35	52	36	43	31	36	15	46	37	34	32	50	34	37	32	28	0.572529	0.221494	OK	0.176909	0.772155	OK	0.779802	0.144714	OK	RFX2	-0.506458	0.387232	-1.30789	0.19091	0.45366	OK	0.181226	0.507314	0.357227	0.720922	0.916038	OK
ENSG00000087995.15	154	183	217	175	99	104	151	107	161	149	83	104	159	123	162	96	116	106	-0.267365	0.236425	OK	-0.296281	0.158178	OK	-0.235302	0.33871	OK	METTL2A	-0.0759791	0.224326	-0.338699	0.734837	0.888963	OK	-0.186565	0.257925	-0.723331	0.469477	0.793731	OK
ENSG00000088035.18	64	49	75	79	40	50	50	32	50	54	30	46	48	44	58	61	28	35	0.115999	0.72554	OK	-0.191207	0.600099	OK	0.0840826	0.83209	OK	ALG6	-0.453505	0.335504	-1.35171	0.176467	0.433964	OK	-0.327356	0.386753	-0.84642	0.397318	0.741842	OK
ENSG00000088038.19	530	659	608	665	432	519	543	417	588	636	378	594	521	513	632	594	615	558	0.125979	0.341922	OK	0.0280842	0.83957	OK	0.20067	0.252973	OK	CNOT3	-0.0241003	0.150311	-0.160336	0.872616	0.952037	OK	0.199	0.169814	1.17187	0.241248	0.604143	OK
ENSG00000088179.9	197	204	226	302	181	183	154	164	219	291	151	227	211	205	219	258	192	188	0.393542	0.067428	OK	0.105656	0.659129	OK	0.0832284	0.674424	OK	PTPN4	0.0236619	0.227471	0.104022	0.917152	0.969603	OK	-0.402102	0.187507	-2.14447	0.0319955	0.201053	OK
ENSG00000088205.13	597	662	641	594	413	394	531	414	706	611	385	488	643	513	761	481	430	394	-0.243181	0.0766607	OK	0.0347048	0.807554	OK	-0.195189	0.164724	OK	DDX18	0.231807	0.149811	1.54733	0.121784	0.352868	OK	0.0702128	0.15506	0.45281	0.650685	0.893569	OK
ENSG00000088247.17	1799	1868	1804	1883	1258	1313	1794	1211	1893	2066	1106	1692	1842	1740	2136	1540	1423	1490	-0.012966	0.901725	OK	-0.236854	0.0139961	OK	-0.227926	0.0376717	OK	KHSRP	-0.00774839	0.105629	-0.0733551	0.941524	0.977897	OK	-0.0712188	0.121167	-0.587771	0.556686	0.846919	OK
ENSG00000088256.9	1525	1562	1430	1493	906	997	1243	939	1378	1344	766	1139	1568	1392	1734	1244	963	1036	-0.174375	0.103146	OK	-0.303037	0.00204122	OK	-0.392804	0.000177386	OK	GNA11	-0.196899	0.115411	-1.70607	0.0879947	0.289044	OK	-0.118245	0.119627	-0.988455	0.32293	0.684168	OK
ENSG00000088280.19	327	298	301	372	233	241	188	164	221	286	158	217	342	283	290	329	233	197	0.00279723	0.987299	OK	-0.0858089	0.711057	OK	0.0585675	0.800232	OK	ASAP3	-0.363701	0.161028	-2.25861	0.0239075	0.121786	OK	-0.0247393	0.229857	-0.107629	0.91429	0.977454	OK
ENSG00000088298.13	363	415	376	403	248	248	350	264	400	440	201	341	411	381	419	336	290	315	-0.110675	0.432041	OK	-0.158152	0.301977	OK	-0.140372	0.327135	OK	EDEM2	0.0348795	0.163061	0.213904	0.830622	0.933474	OK	0.0649999	0.154393	0.421004	0.673752	0.900273	OK
ENSG00000088305.18	49	47	32	46	34	31	41	15	39	39	25	31	33	30	50	32	33	33	0.203481	0.575848	OK	-0.0337369	0.937718	OK	0.0400493	0.916889	OK	DNMT3B	-0.417089	0.379604	-1.09875	0.271878	0.549012	OK	-0.311542	0.373899	-0.833224	0.404718	0.74819	OK
ENSG00000088325.16	337	313	336	390	185	215	448	235	369	591	287	362	176	180	245	137	171	240	-0.103051	0.555693	OK	0.16272	0.362291	OK	0.117107	0.632879	OK	TPX2	0.620848	0.183267	3.38767	0.000704889	0.00847283	OK	-0.470208	0.247683	-1.89843	0.0576401	0.285651	OK
ENSG00000088340.16	119	299	293	127	193	288	161	219	359	289	317	441	168	381	512	236	446	457	-0.232378	0.665039	OK	0.678924	0.232448	OK	0.646274	0.262972	OK	FER1L4	0.934968	0.553965	1.68777	0.0914548	0.296047	OK	1.02686	0.594422	1.7275	0.0840781	0.353468	OK
ENSG00000088356.6	130	124	122	145	100	91	125	88	122	191	109	152	129	101	137	140	121	131	0.0922501	0.667918	OK	0.348246	0.094342	OK	0.332265	0.114833	OK	PDRG1	0.364787	0.209266	1.74317	0.0813036	0.273758	OK	0.221914	0.21662	1.02444	0.305628	0.668108	OK
ENSG00000088367.23	991	997	990	880	574	554	726	538	756	770	440	658	1113	971	1224	813	665	700	-0.285129	0.00624357	OK	0.0104631	0.950291	OK	-0.21332	0.129101	OK	EPB41L1	-0.209628	0.156811	-1.33682	0.181281	0.440876	OK	0.172379	0.142884	1.20643	0.227653	0.586262	OK
ENSG00000088387.19	385	448	428	501	271	278	398	256	433	444	241	324	495	444	521	286	246	300	-0.436068	0.0627498	OK	-0.441931	0.00324972	OK	-0.579795	0.000123127	OK	DOCK9	0.0148873	0.231516	0.0643036	0.948729	0.980308	OK	-0.109621	0.240022	-0.456712	0.647878	0.892814	OK
ENSG00000088448.14	186	216	189	286	234	276	134	84	139	212	133	144	144	131	202	156	182	161	0.580401	0.00103214	OK	0.0480427	0.81581	OK	0.364953	0.0861082	OK	ANKRD10	-0.742972	0.188337	-3.94491	7.98294e-05	0.00138617	OK	-0.412554	0.199672	-2.06616	0.0388129	0.224025	OK
ENSG00000088451.11	74	54	62	89	47	35	58	34	57	97	65	75	62	53	52	87	58	69	0.156018	0.641145	OK	0.695166	0.0217152	OK	0.571328	0.0537254	OK	TGDS	0.520719	0.319648	1.62904	0.103305	0.3198	OK	0.303543	0.324353	0.935842	0.349355	0.707289	OK
ENSG00000088543.15	50	46	52	74	46	30	24	23	22	44	40	41	53	27	46	37	40	44	0.240045	0.542238	OK	0.6965	0.106023	OK	0.163776	0.700589	OK	C3orf18	-0.125442	0.379247	-0.330765	0.740822	0.892674	OK	0.161715	0.409061	0.395332	0.692598	0.906261	OK
ENSG00000088682.14	311	348	302	293	184	201	171	123	224	244	162	190	290	250	357	235	208	217	-0.347122	0.0203037	OK	0.10052	0.61368	OK	-0.200437	0.216884	OK	COQ9	-0.225642	0.175961	-1.28234	0.199723	0.465678	OK	0.00174673	0.169831	0.0102851	0.991794	0.998421	OK
ENSG00000088727.12	22	34	16	21	18	23	14	8	27	17	16	11	21	21	24	14	14	14	0.169719	0.732247	OK	-0.0067831	0.991208	OK	-0.451975	0.40006	OK	KIF9	-0.653489	0.549802	-1.18859	0.234601	0.508208	OK	-0.736092	0.537486	-1.36951	0.17084	0.518853	OK
ENSG00000088766.12	192	219	217	217	125	174	174	155	207	249	128	218	210	186	241	232	199	187	-0.172142	0.365226	OK	0.0983311	0.607634	OK	0.0731522	0.698538	OK	CRLS1	0.258314	0.208139	1.24107	0.214581	0.483532	OK	0.154948	0.21119	0.733691	0.463137	0.788825	OK
ENSG00000088808.18	126	128	146	98	58	54	101	73	137	69	42	61	146	109	147	86	69	55	-0.952625	0.00141119	OK	-0.885912	0.00122076	OK	0.102676	0.743125	OK	PPP1R13B	-0.169813	0.293611	-0.578359	0.563022	0.792312	OK	0.826709	0.342031	2.41706	0.0156464	0.123253	OK
ENSG00000088812.18	1161	1423	1415	1258	752	857	1172	857	1476	1319	672	1161	1530	1416	1786	1204	1005	1034	-0.171026	0.155804	OK	-0.23055	0.0628686	OK	-0.302594	0.00397781	OK	ATRN	0.025434	0.128183	0.198419	0.842717	0.938	OK	0.162954	0.113536	1.43526	0.151213	0.490496	OK
ENSG00000088826.18	122	159	193	206	204	172	160	131	174	258	170	230	182	195	197	178	229	255	0.687183	0.00774407	OK	0.548729	0.0117716	OK	0.588331	0.0144631	OK	SMOX	0.127192	0.250333	0.50809	0.61139	0.823512	OK	0.203053	0.273819	0.741557	0.458356	0.786302	OK
ENSG00000088832.17	4500	4503	4137	4565	2839	2859	4639	3252	4394	5627	3081	3894	4319	3927	5060	3876	3324	3512	-0.0434531	0.625011	OK	0.00536015	0.962623	OK	-0.0127083	0.884626	OK	FKBP1A	0.27082	0.107134	2.52785	0.0114763	0.0720651	OK	0.133452	0.099986	1.3347	0.181974	0.531961	OK
ENSG00000088833.17	564	645	546	654	397	426	521	393	634	630	362	510	657	512	638	501	461	460	0.046763	0.736711	OK	0.0554797	0.70142	OK	-0.0742744	0.633094	OK	NSFL1C	-0.00449672	0.135177	-0.0332653	0.973463	0.990152	OK	-0.0418061	0.134323	-0.311236	0.755621	0.930384	OK
ENSG00000088836.14	35	36	38	30	19	23	19	17	22	33	10	12	19	10	32	24	17	20	-0.0998279	0.845655	OK	-0.573554	0.38961	OK	-0.174687	0.741404	OK	SLC4A11	-0.671369	0.608004	-1.10422	0.269499	0.546387	OK	-1.0057	0.531607	-1.8918	0.0585172	0.287687	OK
ENSG00000088854.12	291	249	283	392	254	289	301	196	325	404	203	284	358	301	380	367	280	308	0.426027	0.00901705	OK	0.03811	0.80972	OK	0.114132	0.443099	OK	C20orf194	-0.139342	0.157765	-0.883229	0.377112	0.654304	OK	0.0295515	0.156689	0.1886	0.850406	0.960297	OK
ENSG00000088876.12	106	140	107	98	69	70	78	67	118	132	64	96	128	107	89	79	70	70	-0.240085	0.429606	OK	0.307639	0.233966	OK	-0.105269	0.729051	OK	ZNF343	0.292386	0.282914	1.03348	0.301379	0.581124	OK	-0.114393	0.322294	-0.354935	0.722639	0.916313	OK
ENSG00000088888.18	1528	1652	1499	1704	1009	1002	1325	855	1318	1611	811	1042	1304	1254	1709	1128	934	915	-0.0920254	0.362846	OK	-0.104757	0.386648	OK	-0.286006	0.0132813	OK	MAVS	-0.163319	0.127946	-1.27647	0.201788	0.467924	OK	-0.307734	0.120073	-2.5629	0.0103802	0.0935146	OK
ENSG00000088899.15	68	73	64	59	35	63	102	76	92	99	37	65	49	46	42	47	31	33	-0.135602	0.672365	OK	-0.631487	0.0231975	OK	-0.158936	0.663755	OK	LZTS3	0.195349	0.339522	0.575366	0.565044	0.793459	OK	-0.56702	0.37629	-1.50687	0.131844	0.455766	OK
ENSG00000088930.8	1053	1139	1028	1158	618	611	796	625	1047	987	463	695	960	826	1086	723	559	614	-0.208434	0.0937663	OK	-0.281737	0.0299428	OK	-0.36337	0.00168206	OK	XRN2	-0.180861	0.146202	-1.23706	0.216063	0.485377	OK	-0.284032	0.143801	-1.97517	0.0482485	0.258475	OK
ENSG00000088970.16	74	78	68	149	87	126	46	43	63	124	66	99	69	55	80	97	105	110	0.923126	0.000766556	OK	0.72121	0.0238549	OK	0.635976	0.0409654	OK	KIZ	-0.448766	0.23892	-1.87831	0.0603385	0.226227	OK	-0.176389	0.268296	-0.657442	0.510897	0.81788	OK
ENSG00000088986.11	2139	2082	1890	2493	1684	1792	1774	1281	1935	2631	1802	2309	2225	1721	2214	2750	2703	2414	0.217079	0.0224014	OK	0.362678	0.000393643	OK	0.5692	4.52998e-07	OK	DYNLL1	0.135071	0.107591	1.25541	0.209329	0.477193	OK	0.389029	0.108165	3.59662	0.000322378	0.00640262	OK
ENSG00000089006.16	434	465	485	410	274	280	459	339	502	546	279	359	389	345	475	308	270	290	-0.0760552	0.574675	OK	-0.216911	0.156308	OK	-0.0990103	0.538798	OK	SNX5	0.217489	0.159567	1.363	0.172884	0.429983	OK	-0.192262	0.157456	-1.22105	0.222067	0.578937	OK
ENSG00000089009.15	6263	7072	6322	6491	4512	4900	7022	5309	7846	8420	5286	7043	6479	6022	7580	6032	5575	5945	-0.04523	0.613793	OK	-0.0535245	0.509688	OK	0.0537298	0.55053	OK	RPL6	0.332785	0.0971986	3.42376	0.000617607	0.00764718	OK	0.162691	0.10284	1.58198	0.113653	0.420838	OK
ENSG00000089022.14	313	277	270	228	138	167	230	196	260	296	140	229	250	231	339	176	192	231	-0.209785	0.320991	OK	-0.0380349	0.857908	OK	0.214424	0.315564	OK	MAPKAPK5	0.268291	0.224447	1.19534	0.231953	0.505213	OK	0.430926	0.229089	1.88104	0.0599664	0.29297	OK
ENSG00000089048.14	157	151	170	263	124	159	153	104	181	232	116	164	169	134	178	203	151	170	0.424915	0.0355211	OK	0.157355	0.422502	OK	0.35959	0.0582667	OK	ESF1	-0.104175	0.20554	-0.506835	0.61227	0.824167	OK	0.000945779	0.205751	0.00459672	0.996332	0.998694	OK
ENSG00000089050.16	248	256	224	207	127	142	205	139	174	199	93	129	167	154	224	116	109	107	-0.375407	0.0609601	OK	-0.3738	0.164397	OK	-0.30736	0.14936	OK	RBBP9	-0.225837	0.249463	-0.905292	0.365311	0.643917	OK	-0.447458	0.22635	-1.97684	0.0480597	0.25776	OK
ENSG00000089053.13	828	933	837	890	535	555	828	605	909	897	519	744	896	792	975	661	654	636	-0.200169	0.0859638	OK	-0.274023	0.0156364	OK	-0.0716455	0.669605	OK	ANAPC5	0.0798238	0.121545	0.656741	0.511347	0.759462	OK	0.16589	0.174862	0.94869	0.342778	0.702001	OK
ENSG00000089057.15	693	714	692	794	441	492	565	385	580	601	333	455	607	536	694	546	407	451	-0.224035	0.0778358	OK	-0.233953	0.0680167	OK	-0.115523	0.382882	OK	SLC23A2	-0.323962	0.143524	-2.2572	0.0239957	0.12199	OK	-0.282878	0.15094	-1.8741	0.0609161	0.295462	OK
ENSG00000089060.11	174	150	151	162	128	106	125	83	128	142	92	109	149	128	162	127	121	101	0.0722884	0.72694	OK	-0.0775245	0.731363	OK	-0.29459	0.168117	OK	SLC8B1	-0.405591	0.220355	-1.84062	0.0656769	0.238598	OK	-0.188731	0.222311	-0.848947	0.395911	0.741323	OK
ENSG00000089063.15	966	1016	959	920	565	710	880	662	1062	1034	595	890	1015	922	1193	921	808	816	-0.15469	0.180432	OK	-0.117988	0.27034	OK	-0.0606892	0.567988	OK	TMEM230	0.152179	0.126829	1.19988	0.230187	0.503443	OK	0.225207	0.128778	1.7488	0.0803248	0.344309	OK
ENSG00000089091.16	36	35	21	56	23	24	26	22	21	43	36	37	33	33	36	37	28	29	0.687687	0.0953546	OK	0.527044	0.237757	OK	0.129913	0.737623	OK	DZANK1	-0.116263	0.3869	-0.300499	0.763797	0.902513	OK	-0.380516	0.393671	-0.966583	0.333753	0.694297	OK
ENSG00000089094.19	286	358	324	290	205	191	234	167	294	303	178	239	280	263	334	269	210	230	-0.260868	0.116962	OK	-0.244562	0.176088	OK	-0.0812599	0.623063	OK	KDM2B	0.0266877	0.172406	0.154795	0.876983	0.954222	OK	-0.0112355	0.177137	-0.0634285	0.949425	0.987394	OK
ENSG00000089123.16	41	44	37	49	40	28	33	36	34	45	24	43	26	50	59	39	56	52	0.365091	0.299384	OK	0.36587	0.362138	OK	0.141517	0.731653	OK	TASP1	0.0782943	0.375062	0.20875	0.834643	0.934996	OK	0.271455	0.378695	0.716817	0.473487	0.796102	OK
ENSG00000089154.11	1760	1767	1703	1318	701	833	1474	930	1700	1342	686	983	1780	1603	1926	958	776	803	-0.633642	7.72989e-06	OK	-0.55296	3.47416e-05	OK	-0.86839	6.75588e-07	OK	GCN1	0.0989013	0.154976	0.63817	0.523363	0.766739	OK	-0.0608424	0.194702	-0.31249	0.754668	0.930078	OK
ENSG00000089157.16	15742	17451	15632	17691	12163	12742	16086	12138	17766	20950	13008	18097	15974	15254	18527	16243	14963	15758	0.0737988	0.312468	OK	0.0935353	0.243485	OK	0.151702	0.0728387	OK	RPLP0	0.211537	0.0874475	2.41902	0.0155623	0.090393	OK	0.126126	0.0922614	1.36705	0.171611	0.520082	OK
ENSG00000089159.16	3131	3556	3430	3352	2478	2824	2519	1847	2940	3304	1968	2932	3169	2986	3994	2787	2761	3128	0.106523	0.266045	OK	0.132195	0.13134	OK	-0.0370972	0.783735	OK	PXN	-0.128811	0.107577	-1.19739	0.231156	0.504138	OK	-0.0517485	0.130991	-0.395053	0.692804	0.906261	OK
ENSG00000089177.18	113	127	151	176	110	125	122	74	150	187	83	134	132	120	154	159	132	146	0.571255	0.0145171	OK	0.225355	0.328284	OK	0.320537	0.114838	OK	KIF16B	-0.175601	0.234259	-0.749601	0.453495	0.715524	OK	-0.0680618	0.223008	-0.305199	0.760214	0.931646	OK
ENSG00000089195.15	160	184	188	123	80	67	181	119	188	149	84	102	180	143	201	99	97	102	-0.766715	0.000279886	OK	-0.575087	0.00510044	OK	-0.510847	0.0150161	OK	TRMT6	0.381642	0.237516	1.60681	0.108097	0.329074	OK	0.365231	0.240922	1.51597	0.129526	0.451566	OK
ENSG00000089220.5	1804	1748	1669	1892	1092	1132	1112	817	1261	1567	832	1212	1476	1248	1549	1292	1125	1087	-0.104847	0.32095	OK	0.0849336	0.392992	OK	-0.058787	0.566474	OK	PEBP1	-0.246617	0.113485	-2.17313	0.0297705	0.141193	OK	-0.218463	0.116131	-1.88118	0.0599476	0.29297	OK
ENSG00000089234.16	216	235	209	248	203	161	222	136	217	297	179	235	211	230	218	239	245	178	-0.0148975	0.932079	OK	0.175891	0.320275	OK	0.312553	0.142032	OK	BRAP	0.285921	0.174905	1.63472	0.102107	0.317628	OK	0.243039	0.210689	1.15354	0.248687	0.610448	OK
ENSG00000089248.7	1005	1069	849	1053	741	736	546	470	702	816	503	765	903	819	1038	879	900	927	0.0688663	0.552702	OK	0.197655	0.121042	OK	0.218386	0.0718385	OK	ERP29	-0.322498	0.122027	-2.64284	0.00822146	0.0564186	OK	0.108957	0.129252	0.842981	0.399239	0.743568	OK
ENSG00000089280.18	2465	2552	2485	2448	1540	1850	2124	1378	2414	2384	1370	2065	2552	2175	3039	2102	1891	2093	-0.0726395	0.47864	OK	-0.0337805	0.752721	OK	-0.0664794	0.484295	OK	FUS	-0.0436913	0.114659	-0.381053	0.703164	0.8702	OK	0.157893	0.110539	1.4284	0.153178	0.493695	OK
ENSG00000089289.16	430	497	446	562	393	411	438	299	454	587	346	425	394	374	407	433	418	395	0.263413	0.0365	OK	0.123828	0.363447	OK	0.31286	0.0264947	OK	IGBP1	-0.0705798	0.137403	-0.513671	0.607482	0.82108	OK	-0.138144	0.138941	-0.994265	0.320094	0.681419	OK
ENSG00000089327.15	669	961	927	835	670	664	821	609	944	1087	684	973	854	893	1162	846	971	1037	0.0432508	0.770666	OK	0.10935	0.324518	OK	0.205709	0.171434	OK	FXYD5	0.235002	0.128351	1.83094	0.0671098	0.241207	OK	0.362788	0.156937	2.31169	0.0207949	0.150846	OK
ENSG00000089335.21	205	259	217	213	141	124	138	148	198	169	85	126	188	165	247	153	151	154	-0.310286	0.106097	OK	-0.581924	0.0049253	OK	-0.151139	0.435862	OK	ZNF302	-0.359765	0.211166	-1.70371	0.088436	0.289839	OK	-0.0456777	0.208521	-0.219056	0.826606	0.953348	OK
ENSG00000089351.14	627	665	575	874	691	668	641	486	643	1077	655	851	627	550	617	810	667	709	0.449559	0.000163845	OK	0.377415	0.0038701	OK	0.402246	0.00162601	OK	GRAMD1A	0.146893	0.126449	1.16168	0.245366	0.519213	OK	-0.0610816	0.128981	-0.473571	0.635806	0.887111	OK
ENSG00000089486.17	187	136	149	195	111	137	156	110	154	181	112	155	144	131	150	180	104	128	0.169729	0.506399	OK	0.167621	0.551458	OK	0.388079	0.10753	OK	CDIP1	0.16348	0.271476	0.602191	0.547047	0.782017	OK	0.116568	0.248237	0.469584	0.638652	0.889061	OK
ENSG00000089505.17	39	54	52	44	30	26	25	24	34	44	26	36	60	57	66	30	39	47	-0.175394	0.626793	OK	0.212419	0.598289	OK	-0.4139	0.235905	OK	CMTM1	-0.144415	0.382148	-0.377904	0.705502	0.871338	OK	0.11771	0.39753	0.296104	0.767151	0.934462	OK
ENSG00000089597.18	8654	10608	10133	8597	6017	6357	6544	5655	8858	7483	4717	7289	5864	6688	8253	4888	4605	5137	-0.206624	0.0292752	OK	-0.163558	0.133894	OK	-0.243132	0.0474543	OK	GANAB	-0.171161	0.102651	-1.6674	0.0954358	0.304215	OK	-0.508644	0.107538	-4.72991	2.24621e-06	9.59066e-05	OK
ENSG00000089639.11	117	148	97	83	58	67	125	94	153	124	94	107	128	125	145	107	91	67	-0.55167	0.0731937	OK	-0.376132	0.087158	OK	-0.403408	0.142559	OK	GMIP	0.571241	0.26115	2.18741	0.0287128	0.138018	OK	0.375532	0.320099	1.17317	0.240726	0.603454	OK
ENSG00000089682.16	74	102	93	121	63	74	89	77	103	114	72	108	98	85	96	87	90	78	0.00815417	0.973404	OK	-0.006327	0.979234	OK	0.0921446	0.717237	OK	RBM41	0.157443	0.24692	0.637629	0.523715	0.766739	OK	-0.0242943	0.261269	-0.0929859	0.925915	0.981017	OK
ENSG00000089685.15	187	200	170	212	108	104	230	146	237	381	150	220	62	88	128	68	74	113	-0.193216	0.355531	OK	0.24753	0.200382	OK	0.0453642	0.886281	OK	BIRC5	0.801531	0.220228	3.63955	0.000273112	0.00390728	OK	-0.707936	0.281104	-2.51841	0.0117884	0.101794	OK
ENSG00000089693.10	2165	2360	2248	2192	1440	1622	2150	1564	2248	2598	1423	2032	2361	2041	2437	2232	1803	1988	-0.108132	0.241673	OK	-0.0955081	0.304725	OK	0.0433137	0.682699	OK	MLF2	0.122939	0.104044	1.18161	0.237362	0.511127	OK	0.206466	0.114571	1.80209	0.0715315	0.322877	OK
ENSG00000089723.10	50	57	52	48	30	25	41	36	60	42	43	68	54	50	53	41	36	33	-0.451583	0.193267	OK	0.134833	0.718946	OK	-0.285203	0.401152	OK	OTUB2	0.574104	0.391128	1.46782	0.142154	0.386337	OK	0.10848	0.378498	0.286606	0.774414	0.937046	OK
ENSG00000089737.17	1219	1329	1213	1231	839	796	1031	680	1115	1099	645	807	1223	936	1311	963	802	810	-0.245456	0.0278244	OK	-0.165864	0.138888	OK	-0.218203	0.126509	OK	DDX24	-0.130261	0.123824	-1.05198	0.29281	0.571754	OK	-0.11785	0.149465	-0.788482	0.430415	0.765416	OK
ENSG00000089775.11	77	78	98	164	92	119	73	53	66	99	60	98	79	74	77	104	108	106	0.568857	0.0601671	OK	0.331331	0.231786	OK	1.05814	5.69655e-05	OK	ZBTB25	-0.453275	0.251961	-1.79899	0.0720201	0.252579	OK	0.092356	0.258362	0.357467	0.720742	0.915978	OK
ENSG00000089818.18	275	340	357	267	180	191	331	209	358	304	201	268	303	312	361	230	194	220	-0.310482	0.0657263	OK	-0.142396	0.445829	OK	-0.296499	0.0999899	OK	NECAP1	0.353627	0.191683	1.84485	0.065059	0.237101	OK	0.224289	0.178286	1.25803	0.208381	0.565058	OK
ENSG00000089876.12	379	515	396	437	334	338	376	263	422	478	340	480	442	377	514	387	399	341	0.0573151	0.705312	OK	0.239638	0.10875	OK	0.0813955	0.58657	OK	DHX32	0.246785	0.162275	1.52078	0.128315	0.36406	OK	0.14886	0.165877	0.897416	0.369497	0.722465	OK
ENSG00000089902.10	1218	1148	1078	848	558	608	1032	698	1055	809	476	647	1287	881	1183	813	647	748	-0.523664	4.68662e-06	OK	-0.709554	7.48535e-09	OK	-0.366139	0.0173453	OK	RCOR1	-0.109967	0.118868	-0.925117	0.354905	0.633952	OK	0.177216	0.134817	1.31449	0.188681	0.539654	OK
ENSG00000089916.18	524	512	510	663	417	451	445	299	496	478	251	362	538	455	526	362	330	295	0.632999	1.62318e-05	OK	-0.00389913	0.980981	OK	0.0769532	0.657513	OK	GPATCH2L	-0.686484	0.147012	-4.66957	3.0183e-06	7.80489e-05	OK	-0.557855	0.149493	-3.73164	0.000190234	0.00418388	OK
ENSG00000090006.17	1614	1909	1963	1636	1272	1339	1162	898	1456	1479	880	1389	1916	2166	2563	1960	1625	1846	-0.125438	0.419713	OK	-0.0114406	0.932291	OK	0.0894563	0.497784	OK	LTBP4	-0.269231	0.133457	-2.01736	0.0436579	0.182827	OK	0.355209	0.14812	2.39811	0.0164798	0.127743	OK
ENSG00000090013.11	109	168	111	130	82	99	63	42	83	102	67	110	89	107	107	99	125	122	-0.0448182	0.851927	OK	0.516644	0.0642555	OK	0.381339	0.133628	OK	BLVRB	-0.25211	0.244124	-1.03271	0.301738	0.581606	OK	0.114771	0.248101	0.462597	0.643653	0.89074	OK
ENSG00000090020.11	646	701	677	882	569	634	663	444	695	793	409	639	731	664	889	603	530	653	0.36077	0.0012976	OK	-0.0509857	0.699324	OK	-0.142591	0.281761	OK	SLC9A1	-0.263081	0.128896	-2.04103	0.0412478	0.176382	OK	-0.299138	0.140071	-2.13562	0.0327102	0.203569	OK
ENSG00000090054.15	689	617	631	668	391	503	536	422	634	602	357	498	763	625	761	620	442	509	0.0560667	0.727907	OK	-0.195793	0.162723	OK	-0.244673	0.0580742	OK	SPTLC1	-0.0858812	0.15997	-0.53686	0.591365	0.811377	OK	0.0149076	0.160688	0.0927737	0.926083	0.981017	OK
ENSG00000090060.18	1385	1593	1677	1555	1098	1099	1460	1175	1751	1744	939	1316	1499	1320	1782	1177	974	997	0.0888085	0.410141	OK	-0.0930318	0.46146	OK	-0.0107498	0.928488	OK	PAPOLA	-0.115038	0.132246	-0.869876	0.384368	0.66034	OK	-0.142542	0.130954	-1.08849	0.27638	0.636581	OK
ENSG00000090061.17	752	838	767	848	574	646	728	491	809	985	528	753	799	725	870	718	645	755	0.0918274	0.423471	OK	0.148395	0.278936	OK	-0.00820656	0.951196	OK	CCNK	0.0770338	0.114831	0.670844	0.50232	0.752699	OK	-0.00894142	0.138702	-0.064465	0.9486	0.987382	OK
ENSG00000090097.21	764	834	729	738	575	614	847	633	893	1145	638	855	900	841	1013	810	753	779	-0.0615626	0.643596	OK	0.0254961	0.826009	OK	-0.0658501	0.552414	OK	PCBP4	0.316434	0.140326	2.25499	0.0241342	0.122418	OK	0.258091	0.139805	1.84608	0.0648806	0.30526	OK
ENSG00000090238.12	357	433	350	500	435	448	254	162	293	494	349	435	330	398	378	490	609	532	0.581731	3.53856e-05	OK	0.703844	6.40666e-05	OK	0.740427	9.39991e-06	OK	YPEL3	-0.242948	0.154252	-1.57501	0.115255	0.341126	OK	0.213014	0.172229	1.23681	0.216157	0.572401	OK
ENSG00000090263.16	159	162	104	157	96	82	86	70	124	124	86	107	129	118	123	101	113	107	-0.123987	0.630751	OK	0.0733717	0.769335	OK	0.121785	0.602087	OK	MRPS33	-0.0277247	0.251454	-0.110258	0.912205	0.96834	OK	0.0580532	0.258297	0.224754	0.822171	0.952909	OK
ENSG00000090266.13	286	309	275	301	146	222	246	176	260	319	173	252	254	192	251	232	224	239	-0.141959	0.433147	OK	-0.0303114	0.851754	OK	0.219061	0.214509	OK	NDUFB2	0.050293	0.192272	0.261571	0.793652	0.91632	OK	0.0453793	0.199066	0.227961	0.819676	0.951819	OK
ENSG00000090273.14	834	827	830	917	603	625	707	573	916	842	527	716	840	718	922	780	691	725	0.0376621	0.727543	OK	-0.158178	0.198973	OK	0.0613626	0.583073	OK	NUDC	-0.09862	0.117408	-0.839976	0.400922	0.674541	OK	0.0286256	0.117876	0.242845	0.808126	0.948998	OK
ENSG00000090316.16	540	601	609	489	359	373	466	379	567	532	290	406	528	483	630	441	345	435	-0.25298	0.0521337	OK	-0.220201	0.104753	OK	-0.221121	0.123237	OK	MAEA	0.00751441	0.140817	0.0533629	0.957443	0.983915	OK	-0.0343017	0.154329	-0.222263	0.824109	0.953285	OK
ENSG00000090339.9	775	549	584	2483	2165	2070	277	197	295	136	135	240	305	121	214	294	153	259	2.06654	7.02973e-39	OK	-0.631025	0.0124597	OK	0.332905	0.268629	OK	ICAM1	-3.78515	0.214743	-17.6264	1.54475e-69	2.2591e-66	OK	-3.30341	0.190477	-17.3429	2.23357e-67	4.8796e-64	OK
ENSG00000090372.15	998	1004	997	976	688	839	894	649	1017	1147	565	941	1027	997	1231	888	790	824	-0.139656	0.260256	OK	0.0719944	0.6279	OK	-0.228834	0.108738	OK	STRN4	0.183802	0.16192	1.13514	0.256316	0.53078	OK	0.0926738	0.137452	0.674228	0.500166	0.812917	OK
ENSG00000090432.7	418	399	381	343	240	266	326	258	416	326	173	250	397	350	472	302	236	255	-0.232868	0.107785	OK	-0.51252	0.000910275	OK	-0.39183	0.00837227	OK	MUL1	-0.275925	0.160705	-1.71697	0.0859843	0.284597	OK	-0.122618	0.162714	-0.753584	0.451099	0.780389	OK
ENSG00000090447.12	26	40	28	22	24	22	27	14	12	23	17	24	22	29	20	23	18	39	-0.129666	0.800613	OK	-0.293837	0.596474	OK	0.339869	0.507943	OK	TFAP4	-0.362592	0.549863	-0.659423	0.509624	0.758186	OK	-0.304387	0.540399	-0.563264	0.573255	0.855308	OK
ENSG00000090470.15	232	250	247	348	229	221	189	126	194	318	203	256	201	205	260	295	268	246	0.388625	0.0291415	OK	0.470929	0.0111673	OK	0.44808	0.00786622	OK	PDCD7	-0.154244	0.180104	-0.856417	0.391767	0.66587	OK	0.00904289	0.177146	0.0510476	0.959288	0.990262	OK
ENSG00000090487.11	581	525	519	630	361	376	403	310	438	515	308	427	511	420	476	498	394	387	0.0202978	0.880439	OK	0.0618806	0.640632	OK	0.061958	0.672067	OK	SPG21	-0.177893	0.138541	-1.28405	0.199126	0.464945	OK	-0.133896	0.144156	-0.928832	0.352976	0.710072	OK
ENSG00000090520.11	1081	1183	1082	1017	735	798	1108	823	1271	1390	830	1123	1478	1278	1543	1435	1278	1269	-0.112773	0.29244	OK	0.00129123	0.989592	OK	0.100037	0.321828	OK	DNAJB11	0.328484	0.115188	2.85172	0.00434828	0.0354817	OK	0.638072	0.116463	5.47874	4.28355e-08	2.76595e-06	OK
ENSG00000090530.10	1928	2209	2221	2300	1817	1920	2854	2334	3304	3884	2192	3152	2866	2783	3281	2757	2352	2262	0.180811	0.182566	OK	0.0222099	0.841409	OK	-0.0991554	0.433733	OK	P3H2	0.554477	0.135421	4.09446	4.23153e-05	0.000789864	OK	0.225954	0.14466	1.56197	0.118296	0.430491	OK
ENSG00000090554.13	33	56	30	44	43	51	25	25	35	28	45	40	25	14	34	40	47	33	0.454771	0.252044	OK	0.503839	0.303364	OK	1.02413	0.0180856	OK	FLT3LG	-0.17537	0.452278	-0.387747	0.698203	0.867776	OK	-0.0328921	0.369234	-0.089082	0.929017	0.982377	OK
ENSG00000090565.16	647	808	771	576	426	465	565	385	567	581	303	497	658	689	847	548	513	499	-0.478899	3.48079e-05	OK	-0.343072	0.0236881	OK	-0.236102	0.105771	OK	RAB11FIP3	-0.0943246	0.148262	-0.636201	0.524646	0.767265	OK	0.226056	0.134844	1.67643	0.0936544	0.376802	OK
ENSG00000090581.10	599	640	623	530	407	468	479	397	570	555	356	546	712	625	790	602	525	597	-0.200717	0.135975	OK	-0.104969	0.429065	OK	0.0281659	0.837679	OK	GNPTG	0.1191	0.147579	0.807021	0.419655	0.689378	OK	0.505005	0.147628	3.42079	0.000624405	0.0109851	OK
ENSG00000090612.21	316	344	272	319	156	168	238	201	287	290	126	209	345	290	379	249	186	215	-0.59863	0.000945643	OK	-0.323807	0.0720515	OK	-0.3777	0.035911	OK	ZNF268	0.142146	0.197409	0.720058	0.471489	0.728904	OK	0.144952	0.202485	0.715866	0.474074	0.796102	OK
ENSG00000090615.15	1503	1719	1823	1512	960	1062	1685	1330	1962	1826	967	1439	1755	1725	2277	1297	1095	1172	-0.379538	0.00526923	OK	-0.273359	0.035982	OK	-0.527489	2.42441e-06	OK	GOLGA3	0.41522	0.110461	3.75898	0.000170611	0.00267649	OK	-0.024077	0.114248	-0.210742	0.833088	0.954723	OK
ENSG00000090621.14	1555	1443	1321	1853	1114	1167	1533	1146	1482	2412	1141	1601	1365	1317	1518	1583	1366	1418	0.326326	0.000797282	OK	0.379133	0.0144417	OK	0.444931	9.24785e-05	OK	PABPC4	0.362893	0.156109	2.32461	0.0200928	0.108121	OK	0.155629	0.109679	1.41895	0.155912	0.497856	OK
ENSG00000090661.12	27	22	12	32	17	21	15	4	9	13	8	18	24	26	33	41	16	27	0.20027	0.706787	OK	0.54681	0.456134	OK	0.496313	0.345092	OK	CERS4	-1.00544	0.538791	-1.86611	0.0620266	0.22997	OK	0.67957	0.532953	1.2751	0.202273	0.557343	OK
ENSG00000090674.16	179	161	199	204	131	125	240	148	175	282	133	205	215	182	192	228	164	171	-0.0401941	0.840663	OK	0.0664405	0.738044	OK	0.272805	0.167963	OK	MCOLN1	0.413468	0.204459	2.02225	0.0431501	0.181335	OK	0.41211	0.203525	2.02486	0.0428815	0.240621	OK
ENSG00000090686.16	566	650	677	485	349	331	525	331	600	547	315	416	609	517	791	502	412	411	-0.407256	0.0145888	OK	-0.159032	0.298705	OK	-0.267557	0.153968	OK	USP48	-0.13852	0.150982	-0.917464	0.3589	0.637581	OK	0.0887846	0.172191	0.515618	0.606122	0.874138	OK
ENSG00000090776.6	112	108	89	119	108	93	56	47	71	71	42	66	67	49	72	51	49	59	0.318736	0.186912	OK	-0.074871	0.802996	OK	-0.0327702	0.915138	OK	EFNB1	-0.941098	0.267663	-3.51598	0.000438128	0.00575513	OK	-1.05205	0.278002	-3.78433	0.000154125	0.00351963	OK
ENSG00000090857.13	1225	1337	1258	1061	675	644	1213	833	1269	1307	665	933	1397	1137	1436	951	705	755	-0.44165	6.38617e-05	OK	-0.125448	0.300567	OK	-0.444422	0.000728018	OK	PDPR	0.324351	0.132473	2.44843	0.0143479	0.0853739	OK	0.0546229	0.140923	0.387609	0.698305	0.908976	OK
ENSG00000090861.15	1137	1337	1361	1337	898	885	889	761	1380	1101	632	1057	1234	1565	1950	1171	908	1038	-0.0286402	0.798877	OK	-0.0969287	0.485569	OK	-0.315072	0.0459809	OK	AARS	-0.182138	0.114666	-1.58842	0.112191	0.33645	OK	0.0293619	0.127405	0.23046	0.817734	0.95117	OK
ENSG00000090863.11	4822	5474	5296	4704	3269	3394	3464	2888	4892	3994	2407	3686	4878	5052	6556	3702	3426	3610	-0.13385	0.120123	OK	-0.229941	0.050293	OK	-0.349986	0.000846313	OK	GLG1	-0.279477	0.10977	-2.54602	0.010896	0.0694831	OK	-0.14835	0.10086	-1.47085	0.141331	0.473949	OK
ENSG00000090889.12	108	97	78	75	65	56	148	55	139	187	84	113	61	45	81	32	39	76	-0.321124	0.229147	OK	0.133568	0.632335	OK	-0.0800603	0.839224	OK	KIF4A	0.931584	0.260116	3.58142	0.000341737	0.00470005	OK	-0.413222	0.385111	-1.073	0.283273	0.644858	OK
ENSG00000090905.19	920	954	918	1316	988	886	1040	691	1030	1453	733	1057	871	858	1036	1035	992	982	0.52884	2.35414e-05	OK	0.802299	2.59875e-08	OK	0.360462	0.00775973	OK	TNRC6A	0.326776	0.141566	2.30828	0.0209833	0.111499	OK	-0.0800522	0.132723	-0.60315	0.546409	0.842488	OK
ENSG00000090924.15	1509	1459	1312	1225	838	883	1492	1006	1492	1355	726	1078	1553	1186	1430	1126	932	961	-0.457381	0.00271101	OK	-0.393546	0.0214517	OK	0.0630957	0.745125	OK	PLEKHG2	0.238722	0.178138	1.34009	0.180216	0.438934	OK	0.24358	0.188828	1.28996	0.197064	0.55091	OK
ENSG00000090971.5	564	622	537	576	369	391	525	392	494	634	343	494	602	491	599	575	461	434	-0.244516	0.0613734	OK	-0.10142	0.415194	OK	-0.00843877	0.953366	OK	NAT14	0.0832696	0.135131	0.616213	0.537754	0.775747	OK	0.153314	0.145629	1.05277	0.292445	0.653824	OK
ENSG00000090975.12	290	397	353	403	358	277	253	189	296	324	184	253	258	289	346	228	244	212	0.200279	0.242993	OK	-0.00450318	0.97838	OK	-0.161064	0.37024	OK	PITPNM2	-0.440042	0.179351	-2.45353	0.0141463	0.084403	OK	-0.614951	0.189035	-3.25311	0.0011415	0.0178341	OK
ENSG00000090989.18	353	358	327	394	216	192	252	234	320	303	165	232	320	259	340	274	163	186	-0.00125268	0.995323	OK	-0.526198	0.00409884	OK	-0.201663	0.362249	OK	EXOC1	-0.453799	0.218442	-2.07744	0.0377613	0.166676	OK	-0.182398	0.258555	-0.705451	0.48053	0.799721	OK
ENSG00000091009.8	445	420	447	383	218	213	381	263	421	447	215	355	400	325	394	286	232	261	-0.786648	0.000172269	OK	-0.337895	0.0547697	OK	-0.205636	0.388566	OK	RBM27	0.200029	0.164376	1.2169	0.223644	0.495933	OK	0.17295	0.23217	0.744931	0.456313	0.784543	OK
ENSG00000091039.17	1202	1370	1443	1418	810	892	850	714	1142	1082	552	1041	1242	1234	1646	1113	943	872	-0.227536	0.058138	OK	-0.122935	0.390914	OK	-0.107086	0.373884	OK	OSBPL8	-0.122558	0.137279	-0.892767	0.371982	0.649943	OK	0.147966	0.132546	1.11634	0.264278	0.625677	OK
ENSG00000091073.19	88	124	100	207	161	174	110	88	123	152	72	122	92	78	107	144	107	125	1.04001	1.82902e-05	OK	-0.174636	0.508572	OK	0.802629	0.000438145	OK	DTX2	-0.748707	0.265723	-2.81762	0.00483809	0.0387106	OK	-0.513958	0.231136	-2.22362	0.0261742	0.17553	OK
ENSG00000091127.14	132	123	137	84	85	88	141	84	159	130	78	112	124	87	125	103	74	96	-0.303463	0.219727	OK	-0.309469	0.165789	OK	0.244699	0.408316	OK	PUS7	0.215727	0.25545	0.844496	0.398392	0.672003	OK	0.347357	0.317723	1.09327	0.274276	0.635411	OK
ENSG00000091136.14	7153	8926	8589	10114	7018	7574	7191	5771	9230	10652	6228	9416	8502	8660	11509	8465	7523	8519	0.262861	0.00304271	OK	0.142038	0.12741	OK	0.0561737	0.61294	OK	LAMB1	0.000932838	0.0978423	0.0095341	0.992393	0.997603	OK	-0.00519854	0.0993488	-0.0523261	0.958269	0.990062	OK
ENSG00000091137.14	78	88	87	113	102	87	49	43	68	88	55	83	48	47	81	49	62	80	0.588328	0.0346838	OK	0.317919	0.284002	OK	0.115173	0.729744	OK	SLC26A4	-0.531403	0.252635	-2.10344	0.0354277	0.15931	OK	-0.687093	0.286231	-2.40048	0.0163734	0.127146	OK
ENSG00000091140.14	684	661	575	720	372	376	518	381	579	585	317	452	584	506	637	556	347	352	-0.0451451	0.7617	OK	-0.126122	0.502778	OK	0.0093382	0.962601	OK	DLD	-0.134137	0.166545	-0.805413	0.420581	0.689404	OK	-0.0115942	0.18282	-0.0634184	0.949433	0.987394	OK
ENSG00000091157.13	295	250	259	324	189	166	175	110	193	260	148	185	262	206	278	187	157	169	0.298153	0.126293	OK	0.245259	0.213799	OK	-0.373463	0.106683	OK	WDR7	-0.618959	0.189071	-3.27368	0.00106157	0.011817	OK	-0.570209	0.215771	-2.64266	0.0082258	0.0797513	OK
ENSG00000091164.13	535	548	519	649	401	421	396	327	491	616	357	467	537	442	511	556	476	513	0.230185	0.0542496	OK	0.24492	0.0729915	OK	0.316055	0.02709	OK	TXNL1	-0.0521168	0.130882	-0.398197	0.690485	0.863729	OK	0.0857374	0.133878	0.640415	0.521903	0.825097	OK
ENSG00000091317.8	1482	1618	1477	1444	829	880	1256	847	1392	1398	711	1013	1571	1232	1634	1292	894	951	-0.296228	0.00386592	OK	-0.240418	0.0280303	OK	-0.276328	0.0196395	OK	CMTM6	-0.0509607	0.12088	-0.421581	0.673331	0.855277	OK	0.0336612	0.131076	0.256807	0.797328	0.945227	OK
ENSG00000091409.15	550	649	688	570	449	432	379	298	498	515	242	408	541	506	751	447	359	411	-0.0733541	0.592157	OK	-0.107243	0.537202	OK	-0.331336	0.0467203	OK	ITGA6	-0.425225	0.148651	-2.86056	0.00422888	0.0348096	OK	-0.365274	0.154118	-2.3701	0.0177834	0.135212	OK
ENSG00000091428.18	10	22	19	26	25	34	5	13	15	21	19	29	12	20	15	10	31	21	0.966369	0.0658669	OK	0.487949	0.453296	OK	0.83219	0.173559	OK	RAPGEF4	0.23534	0.443766	0.530324	0.595887	0.814526	OK	0.094038	0.474542	0.198166	0.842915	0.958175	OK
ENSG00000091436.17	1116	1044	1029	1231	733	738	1071	684	1099	1311	566	893	1180	853	1132	901	681	703	-0.0442798	0.703304	OK	-0.239367	0.0811	OK	-0.267178	0.0404772	OK	MAP3K20	-0.0152787	0.140651	-0.108628	0.913497	0.96892	OK	-0.220402	0.126596	-1.74098	0.0816868	0.347759	OK
ENSG00000091483.6	428	469	413	355	213	233	309	260	420	381	207	306	407	351	413	276	228	282	-0.489438	0.000965641	OK	-0.232783	0.122356	OK	-0.428841	0.00447441	OK	FH	0.0489132	0.160849	0.304094	0.761057	0.901401	OK	-0.0736416	0.16835	-0.437431	0.661799	0.896253	OK
ENSG00000091490.11	137	136	116	131	55	55	183	102	171	148	62	75	156	100	120	91	65	69	0.146076	0.664244	OK	-0.566812	0.0245617	OK	-0.742112	0.00209431	OK	SEL1L3	-0.243732	0.36471	-0.668288	0.50395	0.754006	OK	-0.659486	0.364278	-1.81039	0.0702348	0.318781	OK
ENSG00000091527.15	3007	2810	2691	4878	3402	3266	2425	1688	2542	3149	1704	2505	2527	2181	2988	2709	2435	2509	0.719375	1.11613e-13	OK	0.02348	0.792743	OK	0.214633	0.0252223	OK	CDV3	-0.716852	0.0948339	-7.55903	4.06095e-14	3.71182e-12	OK	-0.59498	0.100419	-5.92499	3.12314e-09	2.40813e-07	OK
ENSG00000091542.9	746	913	900	931	782	795	654	510	793	1044	738	937	864	864	1161	990	928	1076	0.252172	0.0571711	OK	0.388925	0.00235673	OK	0.263253	0.0391204	OK	ALKBH5	0.0423503	0.139882	0.302757	0.762075	0.90153	OK	0.206246	0.142004	1.45239	0.146392	0.482138	OK
ENSG00000091592.16	144	168	145	270	158	134	109	108	139	194	119	167	150	156	220	159	194	176	0.747319	9.80438e-05	OK	0.278479	0.186108	OK	0.434392	0.154065	OK	NLRP1	-0.498801	0.196047	-2.54429	0.0109501	0.0697945	OK	0.160705	0.265017	0.606396	0.544252	0.840796	OK
ENSG00000091622.16	152	166	161	113	81	97	82	61	96	50	50	76	175	180	259	95	120	138	-0.281548	0.188612	OK	-0.275835	0.47883	OK	-0.595673	0.0102612	OK	PITPNM3	-0.594913	0.374116	-1.59018	0.111794	0.335789	OK	0.105101	0.265775	0.39545	0.692511	0.906261	OK
ENSG00000091640.8	416	446	380	562	377	378	343	268	386	521	330	375	404	350	433	469	481	408	0.345209	0.00686075	OK	0.199176	0.179819	OK	0.372821	0.0104665	OK	SPAG7	-0.17482	0.143292	-1.22003	0.222454	0.493917	OK	-0.00996089	0.146014	-0.0682186	0.945612	0.986634	OK
ENSG00000091651.9	48	46	71	56	45	55	74	44	73	120	52	72	40	31	54	39	38	31	0.17413	0.611325	OK	0.250184	0.383518	OK	0.0316664	0.932051	OK	ORC6	0.526304	0.303739	1.73275	0.0831398	0.277597	OK	-0.557889	0.350179	-1.59316	0.111125	0.414994	OK
ENSG00000091656.19	772	787	714	1008	618	674	936	643	912	1066	592	856	652	580	765	651	683	599	0.282327	0.0135235	OK	-0.0500509	0.667031	OK	0.260679	0.0636091	OK	ZFHX4	0.0588203	0.124327	0.473111	0.636134	0.836119	OK	-0.220158	0.148195	-1.4856	0.137384	0.4669	OK
ENSG00000091732.16	153	149	151	136	89	81	124	93	127	130	63	116	152	109	146	114	88	92	-0.33021	0.120333	OK	-0.368062	0.124396	OK	-0.164254	0.477387	OK	ZC3HC1	-0.0745435	0.240979	-0.309337	0.757065	0.900486	OK	0.0162229	0.241735	0.06711	0.946494	0.986695	OK
ENSG00000091844.8	15	22	19	22	18	18	20	14	18	18	18	11	16	15	7	10	11	16	0.279438	0.578088	OK	-0.13535	0.814253	OK	0.176598	0.794165	OK	RGS17	-0.21444	0.552524	-0.38811	0.697934	0.867606	OK	-0.516264	0.570905	-0.904292	0.365841	0.719711	OK
ENSG00000091947.10	184	193	180	193	113	120	156	108	181	233	122	161	200	195	215	180	175	190	-0.161242	0.390416	OK	0.0990216	0.616912	OK	0.0696297	0.699918	OK	TMEM101	0.232069	0.201486	1.15179	0.249407	0.523557	OK	0.371327	0.198001	1.87537	0.0607413	0.295148	OK
ENSG00000091986.15	23204	27224	31226	22905	15075	20012	23632	18506	33015	25711	14310	24481	29032	29229	43753	21764	20153	25992	-0.0402098	0.779939	OK	-0.150558	0.243394	OK	-0.159234	0.302291	OK	CCDC80	0.110126	0.149374	0.737251	0.460969	0.720949	OK	0.312087	0.16741	1.86421	0.0622925	0.298617	OK
ENSG00000092010.15	768	900	772	743	507	522	511	385	557	630	340	493	624	502	647	568	464	547	-0.204457	0.0616624	OK	-0.107482	0.396098	OK	0.0560171	0.662389	OK	PSME1	-0.366689	0.126215	-2.90527	0.00366936	0.0310209	OK	-0.166062	0.128653	-1.29077	0.196783	0.550689	OK
ENSG00000092020.10	165	189	161	206	126	109	179	124	194	225	138	172	191	176	189	156	129	121	0.0111742	0.955909	OK	-0.12777	0.569035	OK	-0.178471	0.392038	OK	PPP2R3C	0.293682	0.222851	1.31784	0.187557	0.449167	OK	0.0547668	0.217662	0.251615	0.801339	0.946984	OK
ENSG00000092036.18	98	122	78	105	64	62	47	39	63	114	50	94	80	56	67	65	90	83	-0.0614466	0.809426	OK	0.669627	0.0313429	OK	0.598118	0.0272371	OK	HAUS4	0.128751	0.275379	0.467542	0.640112	0.838905	OK	0.371235	0.265456	1.39848	0.161969	0.507068	OK
ENSG00000092068.20	156	80	64	392	144	185	57	28	48	206	66	146	92	40	45	382	126	312	1.35607	9.61629e-06	OK	1.55816	1.77286e-07	OK	2.43981	8.55378e-05	OK	SLC7A8	-0.544255	0.240485	-2.26316	0.0236258	0.120762	OK	0.356309	0.313505	1.13653	0.255734	0.617205	OK
ENSG00000092094.11	114	118	116	109	43	90	90	63	126	148	60	104	120	88	132	110	92	96	-0.385265	0.226015	OK	-0.0542438	0.851325	OK	-0.172652	0.488733	OK	OSGEP	0.381663	0.352321	1.08328	0.278684	0.55686	OK	0.331597	0.327648	1.01205	0.311513	0.67419	OK
ENSG00000092096.16	140	215	233	122	119	158	163	151	286	167	108	235	160	247	317	181	161	193	-0.188686	0.470613	OK	-0.434753	0.0998427	OK	-0.277651	0.223272	OK	SLC22A17	0.139645	0.279199	0.500162	0.616961	0.826461	OK	0.341272	0.241785	1.41147	0.158107	0.501246	OK
ENSG00000092098.17	295	418	326	349	207	219	282	198	287	350	196	298	268	245	334	280	284	274	-0.272444	0.127132	OK	-0.13207	0.397826	OK	-0.0362416	0.833209	OK	RNF31	0.366978	0.182546	2.01033	0.0443963	0.184802	OK	0.227964	0.189565	1.20256	0.229145	0.588417	OK
ENSG00000092108.21	685	728	597	686	440	368	548	399	695	607	410	502	690	544	748	550	473	481	-0.267805	0.0536491	OK	-0.199471	0.119783	OK	-0.0977569	0.43557	OK	SCFD1	0.126493	0.144356	0.876257	0.38089	0.657393	OK	0.187397	0.142306	1.31686	0.187886	0.539148	OK
ENSG00000092140.16	124	161	153	155	110	80	200	130	194	189	122	157	112	111	156	119	130	133	-0.11574	0.613638	OK	-0.163167	0.390653	OK	0.242136	0.321473	OK	G2E3	0.470654	0.223372	2.10704	0.0351138	0.158385	OK	0.275029	0.256578	1.07191	0.28376	0.64517	OK
ENSG00000092148.13	1941	2087	1956	2126	1330	1373	1619	1077	1702	1791	889	1304	1809	1687	2145	1474	1221	1270	0.0084506	0.93524	OK	-0.112495	0.360623	OK	-0.059195	0.582401	OK	HECTD1	-0.356392	0.130212	-2.73701	0.00619998	0.0462871	OK	-0.186787	0.127147	-1.46907	0.141815	0.475014	OK
ENSG00000092199.17	3831	3922	3282	5302	3379	3312	3770	2538	3812	4870	2777	3689	3268	2758	3570	3430	2902	3048	0.407404	1.80933e-05	OK	0.113584	0.188045	OK	0.214064	0.0145554	OK	HNRNPC	-0.138098	0.092691	-1.48987	0.136258	0.377963	OK	-0.354969	0.0962283	-3.68883	0.00022529	0.0047554	OK
ENSG00000092201.10	1251	1198	1294	1195	765	789	1153	734	1198	1272	649	967	1081	904	1359	826	806	823	-0.220038	0.0390465	OK	-0.156107	0.147492	OK	-0.183275	0.147121	OK	SUPT16H	0.0690331	0.113701	0.607147	0.543753	0.780194	OK	-0.107712	0.120167	-0.896351	0.370065	0.723018	OK
ENSG00000092203.14	770	793	755	1008	705	648	610	495	728	867	527	743	766	704	909	829	697	744	0.259256	0.0525242	OK	0.0141037	0.917138	OK	0.107832	0.37396	OK	TOX4	-0.242622	0.147795	-1.6416	0.100672	0.315187	OK	-0.256957	0.143039	-1.79641	0.0724297	0.324695	OK
ENSG00000092208.17	40	44	29	18	21	14	28	27	29	44	20	34	32	31	47	26	16	15	-0.797673	0.081387	OK	0.053122	0.912811	OK	-0.626597	0.18573	OK	GEMIN2	0.607956	0.479357	1.26827	0.2047	0.471722	OK	0.205808	0.567245	0.36282	0.71674	0.915592	OK
ENSG00000092330.18	428	493	431	502	360	354	352	264	373	403	266	340	484	387	474	390	348	393	0.265093	0.0529414	OK	-0.0634358	0.686401	OK	-0.0714574	0.677523	OK	TINF2	-0.48357	0.156627	-3.08739	0.00201921	0.0193991	OK	-0.196067	0.167669	-1.16937	0.242253	0.605506	OK
ENSG00000092439.16	646	741	653	905	593	536	491	341	508	702	348	509	610	410	649	724	485	484	0.421958	0.0133125	OK	0.144644	0.40681	OK	0.192302	0.219345	OK	TRPM7	-0.620164	0.158392	-3.91537	9.02657e-05	0.00153498	OK	-0.401566	0.148424	-2.70554	0.00681941	0.0692896	OK
ENSG00000092445.12	188	154	144	189	102	99	186	127	145	241	101	138	169	124	189	131	88	123	-0.107128	0.743179	OK	-0.499191	0.0795444	OK	-0.554865	0.0183237	OK	TYRO3	0.114468	0.317391	0.360654	0.718358	0.878802	OK	-0.195297	0.300412	-0.650098	0.515629	0.821447	OK
ENSG00000092470.12	76	77	104	61	57	63	76	58	75	84	49	55	43	40	67	25	41	55	-0.364212	0.227701	OK	-0.299682	0.291213	OK	0.282655	0.542512	OK	WDR76	-0.042315	0.318338	-0.132925	0.894253	0.962664	OK	-0.296778	0.456474	-0.650152	0.515594	0.821447	OK
ENSG00000092531.10	514	558	457	653	456	410	566	450	658	685	436	544	566	502	592	508	484	424	0.400767	0.00248867	OK	-0.079131	0.556138	OK	0.00878951	0.954155	OK	SNAP23	0.133222	0.138962	0.958693	0.337713	0.617874	OK	-0.162048	0.157695	-1.02761	0.304135	0.666432	OK
ENSG00000092621.12	342	397	467	433	314	328	329	333	596	422	342	567	291	498	724	326	436	432	-0.0483791	0.77816	OK	-0.0412021	0.833871	OK	0.033878	0.939611	OK	PHGDH	0.625642	0.165078	3.78998	0.000150659	0.0024007	OK	0.426749	0.226399	1.88495	0.0594371	0.290927	OK
ENSG00000092820.18	5297	4881	4642	4891	2910	3381	4055	2580	4048	5019	2655	3923	5071	3753	5104	4554	3830	4079	-0.158721	0.108488	OK	0.0334919	0.716393	OK	0.0678064	0.513519	OK	EZR	-0.0118047	0.0990062	-0.119232	0.905092	0.96615	OK	0.162288	0.101682	1.59604	0.11048	0.41378	OK
ENSG00000092841.18	11924	12106	11288	11336	7303	7916	12729	9464	14071	15084	8782	12244	13216	12301	13975	11591	10054	10518	-0.147297	0.0601607	OK	-0.0846807	0.253481	OK	-0.0531889	0.526876	OK	MYL6	0.432351	0.0841825	5.13587	2.80835e-07	9.6009e-06	OK	0.292613	0.0888671	3.2927	0.000992305	0.0158817	OK
ENSG00000092847.12	559	607	563	497	349	329	625	428	701	652	381	524	572	471	627	340	314	380	-0.211336	0.129315	OK	-0.165409	0.205772	OK	-0.469762	0.00440239	OK	AGO1	0.31545	0.149684	2.10744	0.0350796	0.15834	OK	-0.249626	0.18584	-1.34323	0.179198	0.529137	OK
ENSG00000092853.14	83	127	80	69	49	52	107	62	108	110	64	77	44	35	83	25	36	43	-0.470725	0.125735	OK	0.127896	0.635817	OK	0.0966145	0.854003	OK	CLSPN	0.765487	0.28975	2.64188	0.00824462	0.056548	OK	-0.104606	0.432051	-0.242114	0.808692	0.948998	OK
ENSG00000092871.16	215	256	201	574	416	408	162	120	144	414	256	300	235	198	251	405	342	346	1.25766	1.82081e-14	OK	1.05563	2.65963e-05	OK	1.02484	2.06906e-10	OK	RFFL	-0.426242	0.186121	-2.29014	0.0220133	0.115232	OK	-0.318146	0.1652	-1.92582	0.0541272	0.276731	OK
ENSG00000092931.11	220	198	207	232	103	141	175	113	189	237	100	194	204	181	231	191	148	165	-0.232976	0.3266	OK	0.240028	0.248268	OK	-0.149091	0.415967	OK	MFSD11	0.188758	0.249519	0.756487	0.449357	0.712926	OK	0.0873722	0.246639	0.354252	0.72315	0.916313	OK
ENSG00000092964.18	2861	2838	2950	3163	2041	2050	2159	1432	2292	2701	1531	2131	2587	2146	3055	2447	1862	2208	-0.0109042	0.904254	OK	0.0236251	0.804058	OK	-0.0143615	0.895175	OK	DPYSL2	-0.25394	0.0938008	-2.70722	0.00678483	0.049148	OK	-0.141671	0.108613	-1.30436	0.19211	0.543626	OK
ENSG00000092969.12	7807	8275	7855	9805	6273	6199	7416	6778	10659	9781	5983	8899	7714	7544	8910	6958	5963	5427	0.138661	0.0939697	OK	-0.0843997	0.437191	OK	-0.139434	0.145469	OK	TGFB2	0.113839	0.0971581	1.17169	0.241323	0.515124	OK	-0.223193	0.100764	-2.215	0.0267601	0.178328	OK
ENSG00000092978.11	177	169	172	191	128	148	149	107	187	213	136	174	160	155	181	195	170	177	0.130797	0.497438	OK	0.311202	0.123865	OK	0.337499	0.0698301	OK	GPATCH2	0.284913	0.203567	1.3996	0.161632	0.415205	OK	0.265765	0.194324	1.36764	0.171425	0.520027	OK
ENSG00000093000.19	490	591	582	432	318	321	549	407	597	681	350	448	542	415	640	375	376	356	-0.265219	0.0781607	OK	-0.0592125	0.715774	OK	-0.2281	0.121519	OK	NUP50	0.432672	0.178562	2.42309	0.0153891	0.0897834	OK	0.032863	0.167887	0.195745	0.84481	0.958465	OK
ENSG00000093009.10	26	35	54	30	29	32	54	39	54	54	33	44	18	18	41	23	25	33	-0.244981	0.602727	OK	-0.417738	0.204361	OK	0.213834	0.682489	OK	CDC45	0.366356	0.391601	0.935533	0.349513	0.628956	OK	-0.16685	0.43892	-0.380137	0.703844	0.910704	OK
ENSG00000093010.13	1362	1297	1256	1394	918	980	1424	904	1262	1786	917	1307	1459	1426	1624	1586	1289	1276	-0.0171038	0.862981	OK	0.0115028	0.917682	OK	0.0761242	0.493984	OK	COMT	0.0770424	0.108899	0.707464	0.479278	0.734773	OK	0.301332	0.114149	2.63981	0.00829526	0.0801876	OK
ENSG00000093144.19	600	564	543	672	415	426	600	422	575	828	375	498	611	432	580	606	413	397	0.0399512	0.753523	OK	0.232427	0.0875121	OK	0.0740231	0.678156	OK	ECHDC1	0.285843	0.137721	2.07553	0.0379378	0.16717	OK	0.0295653	0.175559	0.168407	0.866263	0.965731	OK
ENSG00000093167.18	433	391	393	499	302	329	437	315	474	618	318	452	360	368	439	399	335	398	0.180187	0.193451	OK	-0.0590242	0.677666	OK	0.17412	0.265613	OK	LRRFIP2	0.246849	0.143229	1.72345	0.0848068	0.281804	OK	-0.0176387	0.160099	-0.110173	0.912272	0.976963	OK
ENSG00000093183.14	475	544	503	589	346	352	492	361	581	654	345	469	483	451	569	476	385	412	-0.060644	0.637964	OK	0.0471885	0.732245	OK	0.0575121	0.655124	OK	SEC22C	0.272429	0.137016	1.9883	0.0467789	0.191391	OK	0.138842	0.140349	0.98926	0.322536	0.684168	OK
ENSG00000093217.11	20	16	19	26	10	20	12	8	17	27	11	16	25	16	23	13	10	13	0.439446	0.424096	OK	0.571932	0.333938	OK	-0.615093	0.268967	OK	XYLB	-0.238104	0.564192	-0.422027	0.673005	0.855218	OK	-0.842261	0.597769	-1.40901	0.158833	0.501682	OK
ENSG00000094631.21	435	470	390	487	238	286	415	233	393	447	248	316	500	383	460	398	275	312	0.066673	0.663155	OK	-0.0811236	0.575015	OK	-0.426447	0.00627042	OK	HDAC6	-0.0143475	0.163541	-0.0877299	0.930091	0.973756	OK	-0.279491	0.170193	-1.6422	0.100548	0.392024	OK
ENSG00000094804.12	83	125	109	76	50	83	177	108	123	204	89	111	91	65	120	81	69	72	0.0415618	0.902621	OK	-0.170303	0.531947	OK	-0.00962577	0.975648	OK	CDC6	0.393406	0.320472	1.22758	0.219603	0.48985	OK	-0.081814	0.341677	-0.239449	0.810758	0.949039	OK
ENSG00000094841.14	82	88	82	97	67	62	65	62	83	104	60	80	90	54	89	56	65	56	0.0614757	0.816487	OK	0.148913	0.616332	OK	-0.144001	0.660677	OK	UPRT	0.202534	0.278496	0.727243	0.467077	0.725664	OK	-0.255734	0.296044	-0.863838	0.387677	0.73389	OK
ENSG00000094880.11	336	344	270	292	156	154	340	212	304	322	148	241	325	294	356	211	195	143	-0.274313	0.118367	OK	-0.0743545	0.686778	OK	-0.570417	0.00675339	OK	CDC23	0.446922	0.191386	2.33519	0.0195336	0.106021	OK	-0.15658	0.237419	-0.65951	0.509568	0.81788	OK
ENSG00000094914.14	388	394	367	351	209	267	265	235	311	336	213	269	299	315	414	230	265	261	-0.220178	0.152397	OK	-0.0848777	0.61629	OK	-0.182682	0.30225	OK	AAAS	-0.0918005	0.168067	-0.546213	0.584919	0.806659	OK	-0.170374	0.190619	-0.893796	0.371431	0.724296	OK
ENSG00000094916.16	2258	2267	2346	2243	1197	1438	2193	1408	2225	2412	1070	1571	2008	1713	2407	1438	1029	1244	-0.175487	0.162997	OK	-0.232701	0.0396518	OK	-0.488999	3.10417e-06	OK	CBX5	0.0550243	0.137782	0.399356	0.689631	0.863234	OK	-0.299429	0.131172	-2.28273	0.0224466	0.158802	OK
ENSG00000094975.14	2189	2411	2298	2204	1213	1305	1743	1320	2073	1790	923	1374	2702	2162	2676	2136	1395	1406	-0.22677	0.0410472	OK	-0.335273	0.00348688	OK	-0.380044	0.00352463	OK	SUCO	-0.224541	0.137759	-1.62996	0.103111	0.319404	OK	0.0270005	0.148847	0.181397	0.856056	0.962053	OK
ENSG00000095002.14	215	204	235	176	118	117	201	98	199	199	128	144	183	130	197	148	119	113	-0.45418	0.0169746	OK	-0.171231	0.454658	OK	-0.219415	0.30739	OK	MSH2	0.160755	0.204895	0.784571	0.432705	0.699251	OK	-0.0743318	0.213628	-0.34795	0.727878	0.918084	OK
ENSG00000095015.6	73	99	99	51	31	24	86	57	116	85	47	50	73	86	99	63	47	46	-1.15598	0.000284536	OK	-0.58071	0.0452801	OK	-0.514797	0.0838719	OK	MAP3K1	0.802603	0.351273	2.28484	0.0223224	0.116498	OK	0.648911	0.357197	1.81667	0.0692672	0.31638	OK
ENSG00000095059.16	241	320	248	239	182	224	249	188	256	313	182	230	232	223	337	228	196	224	-0.199537	0.255423	OK	-0.0111649	0.946929	OK	-0.0398868	0.832622	OK	DHPS	0.153327	0.176996	0.866273	0.38634	0.662025	OK	0.0318888	0.182581	0.174656	0.86135	0.964124	OK
ENSG00000095066.11	109	121	117	120	78	79	83	76	97	94	77	76	95	82	90	56	67	60	-0.0397606	0.860119	OK	-0.339629	0.314258	OK	-0.525755	0.0849775	OK	HOOK2	-0.187032	0.279159	-0.669985	0.502868	0.752933	OK	-0.598352	0.280292	-2.13475	0.0327817	0.203702	OK
ENSG00000095139.14	3235	3371	3272	3183	2121	2279	3156	2344	3689	3591	2150	3192	3786	3221	4196	3217	2784	2941	-0.127586	0.133819	OK	-0.0911189	0.312088	OK	-0.0860283	0.320959	OK	ARCN1	0.204405	0.0988789	2.06723	0.0387124	0.169393	OK	0.250802	0.0975567	2.57084	0.0101454	0.0922229	OK
ENSG00000095209.12	24	28	27	32	29	30	30	19	28	58	30	40	32	23	20	64	37	21	0.715944	0.109428	OK	0.715123	0.0709929	OK	0.855132	0.0796832	OK	TMEM38B	0.260651	0.415494	0.627329	0.530444	0.772141	OK	0.270655	0.474228	0.570727	0.568184	0.851609	OK
ENSG00000095261.14	329	319	304	242	178	167	278	184	274	248	122	184	336	279	321	184	141	129	-0.898663	0.000282984	OK	-0.385033	0.0293532	OK	-1.29458	3.7469e-07	OK	PSMD5	-0.0297634	0.184723	-0.161125	0.871995	0.951754	OK	-0.398164	0.20584	-1.93433	0.0530722	0.27368	OK
ENSG00000095319.14	941	958	971	919	517	584	975	581	919	996	473	669	934	825	980	648	408	481	-0.406117	0.0209066	OK	-0.403804	0.0146398	OK	-0.562241	0.00010161	OK	NUP188	-0.098268	0.192818	-0.509641	0.610303	0.822865	OK	-0.405848	0.19005	-2.13548	0.032722	0.203569	OK
ENSG00000095321.17	621	684	590	702	453	432	512	383	522	636	367	495	571	498	556	546	509	480	-0.04381	0.744117	OK	0.0234256	0.859113	OK	0.135019	0.350545	OK	CRAT	-0.223272	0.145689	-1.53253	0.125392	0.359174	OK	-0.0713707	0.149439	-0.477591	0.632941	0.885416	OK
ENSG00000095380.11	790	911	921	828	627	653	789	556	905	957	578	764	840	830	978	821	658	741	-0.0417377	0.734656	OK	-0.0457713	0.681467	OK	-0.0212551	0.852157	OK	NANS	0.0335899	0.124826	0.269095	0.787857	0.914322	OK	0.046007	0.129794	0.354462	0.722993	0.916313	OK
ENSG00000095383.20	2027	1978	1937	1387	896	1011	1374	1039	1528	1465	716	1124	2282	1810	2228	1532	1099	1311	-0.604522	6.13832e-10	OK	-0.368105	0.000528745	OK	-0.469735	0.000125072	OK	TBC1D2	-0.0946078	0.117148	-0.80759	0.419327	0.689355	OK	0.244969	0.127405	1.92276	0.0545105	0.277662	OK
ENSG00000095397.14	206	248	238	381	301	336	155	137	215	335	237	328	295	326	377	512	444	496	0.889863	3.49289e-08	OK	0.862703	2.44354e-06	OK	0.763297	1.41104e-07	OK	WHRN	-0.179088	0.167259	-1.07072	0.284294	0.563197	OK	0.523565	0.152934	3.42347	0.000618273	0.0109223	OK
ENSG00000095485.18	164	220	222	217	148	129	167	103	194	218	117	169	160	119	197	158	130	148	-0.13407	0.535444	OK	0.0440418	0.829014	OK	0.127036	0.572056	OK	CWF19L1	0.0409134	0.195233	0.209562	0.834009	0.934949	OK	-0.0117949	0.200272	-0.0588944	0.953036	0.987835	OK
ENSG00000095539.15	233	238	208	287	178	142	152	137	207	217	123	197	192	179	192	190	159	150	-0.148653	0.564883	OK	-0.277746	0.32329	OK	0.269999	0.204242	OK	SEMA4G	-0.393677	0.296006	-1.32996	0.183531	0.443399	OK	-0.407594	0.270805	-1.50512	0.132293	0.456821	OK
ENSG00000095564.14	826	896	897	1073	769	736	749	485	850	837	536	700	873	773	1086	723	720	686	0.282457	0.00769265	OK	-0.0177167	0.883137	OK	-0.0997016	0.438457	OK	BTAF1	-0.325056	0.119094	-2.7294	0.00634487	0.0470221	OK	-0.246962	0.132868	-1.8587	0.0630695	0.300606	OK
ENSG00000095574.11	143	177	226	260	185	178	127	112	183	209	141	194	134	121	187	156	174	135	0.503251	0.0205571	OK	0.00608159	0.980102	OK	0.474424	0.0349259	OK	IKZF5	-0.288832	0.176138	-1.63981	0.101045	0.315808	OK	-0.189723	0.202164	-0.938461	0.348007	0.706471	OK
ENSG00000095739.11	726	914	808	2062	1975	2160	547	529	768	868	731	963	554	723	820	686	913	1043	1.62458	4.9998e-26	OK	0.40224	0.0199224	OK	0.543239	0.0070497	OK	BAMBI	-1.32918	0.181808	-7.31089	2.6537e-13	2.22472e-11	OK	-1.25905	0.206056	-6.11025	9.94728e-10	8.25247e-08	OK
ENSG00000095752.7	681	522	531	723	440	490	1009	564	771	930	403	691	718	512	678	549	488	533	0.117163	0.434736	OK	-0.245546	0.127037	OK	-0.0252797	0.860318	OK	IL11	0.371247	0.137736	2.69535	0.00703137	0.0506247	OK	0.0430153	0.136443	0.315262	0.752563	0.928942	OK
ENSG00000095787.23	1172	1331	1296	1885	1383	1241	1014	779	1230	1656	1080	1459	1253	1073	1472	1427	1457	1372	0.39044	0.000122952	OK	0.329912	0.00721586	OK	0.219922	0.0347666	OK	WAC	-0.153433	0.114787	-1.33668	0.181327	0.440883	OK	-0.0618527	0.114803	-0.53877	0.590045	0.865523	OK
ENSG00000095794.19	66	72	84	128	90	87	49	38	59	68	44	56	89	70	76	57	81	81	0.721056	0.00402123	OK	0.246249	0.473045	OK	0.13503	0.679947	OK	CREM	-0.675163	0.28203	-2.39394	0.0166686	0.094852	OK	-0.374219	0.302828	-1.23575	0.216553	0.572639	OK
ENSG00000095906.17	276	362	308	262	179	221	271	207	320	309	180	234	296	317	326	275	225	264	-0.254079	0.125799	OK	-0.252598	0.124141	OK	-0.098689	0.536274	OK	NUBP2	0.118958	0.169978	0.699842	0.484026	0.737979	OK	0.205396	0.174418	1.17761	0.238953	0.600917	OK
ENSG00000095951.17	1644	1761	1897	4703	3448	3609	1825	1272	2099	3614	1732	3001	2027	1806	2491	3262	2783	3184	1.35353	5.97139e-35	OK	0.645458	2.47611e-10	OK	0.877584	1.26026e-22	OK	HIVEP1	-0.462989	0.107687	-4.29941	1.71256e-05	0.000355851	OK	-0.175253	0.104676	-1.67425	0.0940819	0.377437	OK
ENSG00000096060.14	472	446	402	310	138	173	363	241	382	357	150	267	492	322	469	389	214	259	-0.879305	8.81295e-07	OK	-0.44859	0.00787386	OK	-0.355971	0.075014	OK	FKBP5	0.282259	0.208984	1.35062	0.176817	0.434294	OK	0.520469	0.226623	2.29663	0.0216399	0.154919	OK
ENSG00000096063.16	713	741	677	705	431	395	509	410	601	578	339	430	592	473	636	419	366	361	-0.29175	0.0224071	OK	-0.159658	0.236124	OK	-0.271507	0.0518112	OK	SRPK1	-0.142177	0.146132	-0.972939	0.330584	0.610284	OK	-0.367574	0.15144	-2.42719	0.0152163	0.120809	OK
[truncated: 11,215 more rows]

## Sheet: log2FC pvalue for scatter plots
gene_name		Log2FC (siControl_LLOMe/siControl)	-Log10Pvalue (siControl_LLOMe/siControl)	Log2FC (siTAB_LLOMe/siTAB)	-Log10Pvalue (siTAB_LLOMe/siTAB)	Log2FC (siTAK1_LLOMe/siTAK1)	-Log10Pvalue (siTAK1_LLOMe/siTAK1)	Log2FC (siTAB_LLOMe/siControl_LLOMe)	-Log10Pvalue (siTAB_LLOMe/siControl_LLOMe)	Log2FC (siTAK1_LLOMe/siControl_LLOMe)	-Log10Pvalue (siTAK1_LLOMe/siControl_LLOMe)
[truncated: 12,721 more rows]

[truncated: 5 more sheets: siControl LLOMe 2 h significant, TAB independent, TAB depedent, TAK1 independent, TAK1 dependent]
