# Supplementary material for: Ubiquitination-activated TAB–TAK1–IKK–NF-κB axis modulates gene expression for cell survival in the lysosomal damage response
Source: bioRxiv preprint, doi:10.1101/2025.03.26.645624, version 2 (2025-07-31)
Supplement: Table S5 [file 645624_file06.xlsx]

## Sheet: DIA-NN Quantification
Protein.Group	Protein.Names	Genes	First.Protein.Description	Control_1	Control_2	LLOMe5m_1	LLOMe5m_2	LLOMe30m_1	LLOMe30m_2	HS276l_1	HS276_2	HS276_LLOMe5m_1	HS276_LLOMe5m_2	HS276_LLOMe30m_1	HS276_LLOMe30m_2
A0A024RBG1	NUD4B_HUMAN	NUDT4B	Diphosphoinositol polyphosphate phosphohydrolase NUDT4B	49475400	50486100	48674300	48877300	47006900	47877300	49176200	50828800	47834800	50345800	47271300	49216000
A0A075B6H9	LV469_HUMAN	IGLV4-69	Immunoglobulin lambda variable 4-69			5002680	4885950
A0A075B6I0	LV861_HUMAN	IGLV8-61	Immunoglobulin lambda variable 8-61				13389500
A0A075B6J2	LV233_HUMAN	IGLV2-33	Probable non-functional immunoglobulin lambda variable 2-33	1294860	1324000		769340	1332150		773632		1239950	554750
A0A075B6J9	LV218_HUMAN	IGLV2-18	Immunoglobulin lambda variable 2-18							3821680				912114
A0A075B6K6	LV403_HUMAN	IGLV4-3	Immunoglobulin lambda variable 4-3	140709
A0A075B6P5;P01615	KV228_HUMAN;KVD28_HUMAN	IGKV2-28;IGKV2D-28	Immunoglobulin kappa variable 2-28				139295		196533						95309.3
A0A075B6S2	KVD29_HUMAN	IGKV2D-29	Immunoglobulin kappa variable 2D-29	1782110	1201730	1971750	1827680	1990540				2128350		1252300	1828800
A0A075B6S6;P06310	KV230_HUMAN;KVD30_HUMAN	IGKV2-30;IGKV2D-30	Immunoglobulin kappa variable 2D-30			2028700			1212450	1135440			1712270
A0A075B6U4	TVA7_HUMAN	TRAV7	T cell receptor alpha variable 7			426132
A0A075B6U7	A0A075B6U7_HUMAN	TRAJ23	T cell receptor alpha joining 23 (Fragment)	10452100	13383100	11557000	11853500		12005600	13092700	11368500	12972800
A0A075B6U8	A0A075B6U8_HUMAN	TRAJ12	T cell receptor alpha joining 12 (Fragment)		178766	211172	227822		220607	175844		192661	205489
A0A075B6V0	A0A075B6V0_HUMAN	TRAJ16	T cell receptor alpha joining 16 (Fragment)										228382
A0A075B6V1	A0A075B6V1_HUMAN	TRAJ43	T cell receptor alpha joining 43 (Fragment)						156042
A0A075B6V3	A0A075B6V3_HUMAN	TRAJ48	T cell receptor alpha joining 48 (Fragment)												1814680
A0A075B6V6	A0A075B6V6_HUMAN	TRDJ2	T cell receptor delta joining 2 (Fragment)		118400000			89353500						128267000
A0A075B6W1	A0A075B6W1_HUMAN	TRDJ3	T cell receptor delta joining 3 (Fragment)			159562								101537
A0A075B6X0	A0A075B6X0_HUMAN	TRAJ45	T cell receptor alpha joining 45 (Fragment)					409501		637219				548617
A0A075B6X3	A0A075B6X3_HUMAN	TRAJ32	T cell receptor alpha joining 32 (Fragment)										883673
A0A075B6X5	TVA18_HUMAN	TRAV18	T cell receptor alpha variable 18				145052						95719.1
A0A075B6X7	A0A075B6X7_HUMAN	TRAJ50	T cell receptor alpha joining 50 (Fragment)			474347	149183
A0A075B6Y2	A0A075B6Y2_HUMAN	TRAJ35	T cell receptor alpha joining 35 (non-functional) (Fragment)								875189
A0A075B6Y5	A0A075B6Y5_HUMAN	TRAJ47	T cell receptor alpha joining 47 (Fragment)				116655
A0A075B6Y8	A0A075B6Y8_HUMAN	TRAJ11	T cell receptor alpha joining 11 (Fragment)			393305
A0A075B6Z1	A0A075B6Z1_HUMAN	TRAJ20	T cell receptor alpha joining 20 (Fragment)	564388				494276	277508			414392		367363
A0A075B6Z8	A0A075B6Z8_HUMAN	TRAJ25	T cell receptor alpha joining 25 (non-functional) (Fragment)	251796					309064			335488
A0A075B700	TJA31_HUMAN	TRAJ31	T cell receptor alpha joining 31												271217
A0A075B702	A0A075B702_HUMAN	TRAJ41	T cell receptor alpha joining 41 (Fragment)		194474	270093	206558			129848		188427	189866
A0A075B709	A0A075B709_HUMAN	TRAJ13	T cell receptor alpha joining 13 (Fragment)							108830
A0A075B712	A0A075B712_HUMAN	TRAJ54	T cell receptor alpha joining 54 (Fragment)							959707			1060570	1131630	973825
A0A075B713	A0A075B713_HUMAN	TRAJ1	T cell receptor alpha joining 1 (non-functional) (Fragment)						618655
A0A075B714	A0A075B714_HUMAN	TRAJ7	T cell receptor alpha joining 7 (Fragment)									592740
A0A075B734	AQP7B_HUMAN	AQP7B	Aquaporin-7B								6874680
A0A075B767	PAL4H_HUMAN	PPIAL4H	Peptidyl-prolyl cis-trans isomerase A-like 4H										19419000
A0A075B7B8	A0A075B7B8_HUMAN	IGHV3OR16-12	Immunoglobulin heavy variable 3/OR16-12 (non-functional) (Fragment)								1847000
A0A075B7D0	A0A075B7D0_HUMAN	IGHV1OR15-1	Immunoglobulin heavy variable 1/OR15-1 (non-functional) (Fragment)										49771400
A0A075B7E8	A0A075B7E8_HUMAN	IGHV3OR16-13	Immunoglobulin heavy variable 3/OR16-13 (non-functional) (Fragment)						145995
A0A075B7F1	A0A075B7F1_HUMAN	IGHV3OR16-8	Immunoglobulin heavy variable 3/OR16-8 (non-functional) (Fragment)					4027830
A0A087WSZ0	KVD08_HUMAN	IGKV1D-8	Immunoglobulin kappa variable 1D-8			1583900	889200	1584440					1769230
A0A087WT02	TVA92_HUMAN	TRAV9-2	T cell receptor alpha variable 9-2				39704.9						99567.6
A0A087WUM9	A0A087WUM9_HUMAN		Uncharacterized protein			736314		2518200	1701570
A0A087WV62	TVB16_HUMAN	TRBV16	T cell receptor beta variable 16			5110690
A0A087WW87;P01614	KV240_HUMAN;KVD40_HUMAN	IGKV2-40;IGKV2D-40	Immunoglobulin kappa variable 2-40	651465	420540				401246	505589	486516	559506		580458
A0A087WZ39	A0A087WZ39_HUMAN	TRBV15	T cell receptor beta variable 15 (Fragment)	364584	373952		1110750	945583						323687
A0A087X0K7	TVB17_HUMAN	TRBV17	Probable non-functional T cell receptor beta variable 17			799010
A0A096LP01	SIM26_HUMAN	SMIM26	Small integral membrane protein 26	2274190	2486090	2708540	2184930	2636470	2105690	2446870	2007620	2170240	1746120	2709460	2059710
A0A096LPI5	GVQW2_HUMAN	CCDC28A-AS1	Putative uncharacterized protein CCDC28A-AS1										78020.9	103469	50015.6
A0A0A0MRZ7	KVD26_HUMAN	IGKV2D-26	Immunoglobulin kappa variable 2D-26	247719	162612	351160							295613
A0A0A0MRZ9	LV552_HUMAN	IGLV5-52	Immunoglobulin lambda variable 5-52												45697.2
A0A0A0MS02	TRGV1_HUMAN	TRGV1	Probable non-functional T cell receptor gamma variable									48970.7
A0A0A0MS04	TVB67_HUMAN	TRBV6-7	Probable non-functional T cell receptor beta variable 6-7			189111	158446	171790
A0A0A0MS06	TVB23_HUMAN	TRBV23-1	Probable non-functional T cell receptor beta variable 23-1		216102						205172
A0A0A0MS14	HV145_HUMAN	IGHV1-45	Immunoglobulin heavy variable 1-45			1671240						690971
A0A0A0MS15	HV349_HUMAN	IGHV3-49	Immunoglobulin heavy variable 3-49										2282960
A0A0A0MT70	TJB26_HUMAN	TRBJ2-6	T cell receptor beta joining 2-6	273100		265297					262654
A0A0A0MT78	TJB27_HUMAN	TRBJ2-7	T cell receptor beta joining 2-7		221856										273856
A0A0A0MT84	A0A0A0MT84_HUMAN	TRGJP2	T cell receptor gamma joining P2 (Fragment)						124540
A0A0A0MT93	A0A0A0MT93_HUMAN	IGLJ6	Immunoglobulin lambda joining 6 (Fragment)	475496
A0A0A0MTA4	TJB25_HUMAN	TRBJ2-5	T cell receptor beta joining 2-5										635606
A0A0A0MTA7	TJB21_HUMAN	TRBJ2-1	T cell receptor beta joining 2-1											302279
A0A0A6YYK6	TVA16_HUMAN	TRAV16	T cell receptor alpha variable 16	54273.3	47390.3	95334.7					74244.3	79603.2		81383.3	42186.1
A0A0B4J1T7	A0A0B4J1T7_HUMAN	LY6G6E	Lymphocyte antigen 6 family member G6E				182393
A0A0B4J1V6	HV373_HUMAN	IGHV3-73	Immunoglobulin heavy variable 3-73	899326			965949	1710750					913538		1414970
A0A0B4J1Z2	KVD43_HUMAN	IGKV1D-43	Immunoglobulin kappa variable 1D-43							18765200
A0A0B4J234	TVA2_HUMAN	TRAV2	T cell receptor alpha variable 2	170364		209643			223315	138720	173246		187410		154757
A0A0B4J237	TVA82_HUMAN	TRAV8-2	T cell receptor alpha variable 8-2				639008			488826
A0A0B4J238	TVA12_HUMAN	TRAV1-2	T cell receptor alpha variable 1-2				23165300					23863300
A0A0B4J271	TVAL3_HUMAN	TRAV12-3	T cell receptor alpha variable 12-3	182190
A0A0B4J280	TVA40_HUMAN	TRAV40	T cell receptor alpha variable 40				3323420
A0A0B4J2D5;P0DPI2	GAL3A_HUMAN;GAL3B_HUMAN	GATD3;GATD3B	Putative glutamine amidotransferase-like class 1 domain-containing protein 3B, mitochondrial	40178300	40511000	42174700	43594600	41106600	42267300	38090600	40042800	40100500	41934100	40524000	40877700
A0A0B4J2E0;P01733	TVBL3_HUMAN;TVBL4_HUMAN	TRBV12-3;TRBV12-4	T cell receptor beta variable 12-4			1010250				1244320
A0A0B4J2H0	HV69D_HUMAN	IGHV1-69D	Immunoglobulin heavy variable 1-69D					389025				249886	802532
A0A0C4DGP1	SGSN1_HUMAN	SMIM10L3	Small integral membrane protein 10-like protein 3												1395780
A0A0C4DH29	HV103_HUMAN	IGHV1-3	Immunoglobulin heavy variable 1-3				115789
A0A0C4DH30	HV316_HUMAN	IGHV3-16	Probable non-functional immunoglobulin heavy variable 3-16	132577
A0A0C4DH34	HV428_HUMAN	IGHV4-28	Immunoglobulin heavy variable 4-28	7346150					3970510
A0A0C4DH72	KV106_HUMAN	IGKV1-6	Immunoglobulin kappa variable 1-6	211886		828505	347838	277200	1677400
A0A0G2JPN4	A0A0G2JPN4_HUMAN		Uncharacterized protein	710046		992575				945681	986102		915345
A0A0J9YWX3	TJB16_HUMAN	TRBJ1-6	T cell receptor beta joining 1-6	4267230
A0A0J9YX06	TJB12_HUMAN	TRBJ1-2	T cell receptor beta joining 1-2				510689	103841				82643.6
A0A0J9YX35	HV64D_HUMAN	IGHV3-64D	Immunoglobulin heavy variable 3-64D			121717								991873
A0A0J9YX57	MAB6B_HUMAN	MAGEB6B	Melanoma-associated antigen B6B				222458							191816
A0A0J9YXA8	TJB11_HUMAN	TRBJ1-1	T cell receptor beta joining 1-1		295917	474831	606893	499792	517098	389237				497941	397741
A0A0J9YXX1	HV5X1_HUMAN	IGHV5-10-1	Immunoglobulin heavy variable 5-10-1					249164
A0A0K0K1A5	TVB65_HUMAN	TRBV6-5	T cell receptor beta variable 6-5			52406							58903.3
A0A0K0K1B3	TVB30_HUMAN	TRBV30	T cell receptor beta variable 30	518212	400356
A0A0K2S4Q6	CD3CH_HUMAN	CD300H	Protein CD300H		750924
A0A0U1RQE8	GLYLB_HUMAN	GLYATL1B	Putative glycine N-acyltransferase-like protein 1B					157782
A0A0U1RQI7	KLF18_HUMAN	KLF18	Kruppel-like factor 18										1595200
A0A0U1RQS6	TM275_HUMAN	TMEM275	Transmembrane protein 275		1642310		945126					1057650
A0A0U1RRK4	LBHD2_HUMAN	LBHD2	LBH domain-containing protein 2							913365			120446
A0A183	LCE6A_HUMAN	LCE6A	Late cornified envelope protein 6A	9007220		1331760	5655260	5763950	9225140	10335500			1562100	5491070
A0A1B0GTH6	CS2IP_HUMAN	CSNKA2IP	Casein kinase II subunit alpha'-interacting protein			54243.4								97327.8	272903
A0A1B0GTS1;A0A1B0GWH4	HSFX3_HUMAN;HSFX4_HUMAN	HSFX3;HSFX4	Heat shock transcription factor, X-linked member 4			1309770	2583590			2200220				2381790
A0A1B0GTU2	CTXD1_HUMAN	CTXND1	Cortexin domain-containing 1 protein										459330
A0A1B0GU71	C97D2_HUMAN	CFAP97D2	Uncharacterized protein CFAP97D2			223363							1884160
A0A1B0GUA5	SIM32_HUMAN	SMIM32	Small integral membrane protein 32											24447200
A0A1B0GUS0	CS085_HUMAN	C19orf85	Uncharacterized protein C19orf85		1178030	3802140					2995300				1174090
A0A1B0GV90	CTXD2_HUMAN	CTXND2	Cortexin domain containing 2											275836
A0A1B0GVD1	F237B_HUMAN	FAM237B	Protein FAM237B					731019	1424210	736522
A0A1B0GVM5	ETDC_HUMAN	ETDC	Embryonic testis differentiation protein homolog C												23120
A0A1B0GVQ3	CC200_HUMAN	CCDC200	Coiled-coil domain-containing protein 200	526200
A0A1B0GVR7	F240C_HUMAN	FAM240C	Protein FAM240C												567308
A0A1B0GVS7	MDFI2_HUMAN	MDFIC2	MyoD family inhibitor domain-containing protein 2									873030
A0A1B0GVY2	A0A1B0GVY2_HUMAN	LOC122455340	Uncharacterized protein								463693
A0A1B0GVZ2	F240B_HUMAN	FAM240B	Protein FAM240B				424853								375856
A0A1B0GW54	SIM39_HUMAN	SMIM39	Small integral membrane protein 39					257638		278540		1172510
A0A1B0GX49	TVB64_HUMAN	TRBV6-4	T cell receptor beta variable 6-4		467405				764366
A0A1B0GX56	TRDV1_HUMAN	TRDV1	T cell receptor delta variable 1				9114690		4118600
A0A1W2PPD8	KDM4F_HUMAN	KDM4F	Probable lysine-specific demethylase 4F											239591	277923
A0A1W2PPK0	CPHL2_HUMAN	CPHXL2	Cytoplasmic polyadenylated homeobox-like protein 2									632038		707673
A0A1W2PPM1	CPHXL_HUMAN	CPHXL	Cytoplasmic polyadenylated homeobox-like protein					279893
A0A1W2PPW3	TFKLL_HUMAN	TAF11L12	TATA-box-binding protein-associated factor 11-like protein 12		105135	147011
A0A1W2PQ27;A0A1W2PQ64;A0A1W2PQC6;A0A1W2PQD8	S72L1_HUMAN;S72L2_HUMAN;S72L4_HUMAN;S72L5_HUMAN	SSU72L1;SSU72L2;SSU72L4;SSU72L5	RNA polymerase II subunit A C-terminal domain phosphatase SSU72 like protein 1			1128570	2367530		3126260	2313330	1007650	2041790
A0A1W2PQF6	A0A1W2PQF6_HUMAN		Immunoglobulin subtype domain-containing protein				153483
A0A1W2PQJ5	S72L3_HUMAN	SSU72L3	RNA polymerase II subunit A C-terminal domain phosphatase SSU72 like protein 3											5104360
A0A1W2PQL4	ZN722_HUMAN	ZNF722	Zinc finger protein 722												2317300
A0A1W2PR19	GSTT4_HUMAN	GSTT4	Glutathione S-transferase theta-4		876281	217783	299484			1592780	457213	207001	256929	4179720	262119
A0A1W2PR48	TLE7_HUMAN	TLE7	Transducin-like enhancer protein 7				288285	347342
A0A1W2PRN6	A0A1W2PRN6_HUMAN	LINC02218	HCG1807616				179383	1527860		1329580	424535	936202	433197		262144
A0A1Y8EI39	A0A1Y8EI39_HUMAN	IGHD6-13	Immunoglobulin heavy diversity 6-13 (Fragment)				194715
A0A286YF18	SMI44_HUMAN	SMIM44	Small integral membrane protein 44			173493		184601	181860
A0A2R8Y619	H2BK1_HUMAN	H2BK1	Histone H2B type 2-K1	5448740000	4841430000	9898430000	9985000000	8096550000	10180000000	4529990000	5132990000	5381620000	5700200000	5148250000	4788450000
A0A2R8YD15	A0A2R8YD15_HUMAN		Uncharacterized protein			204361
A0A2R8YFL7	OSP4A_HUMAN	OOSP4A	Oocyte-secreted protein 4A			49144.8			95675.2
A0A2R8YFM6	OOSP3_HUMAN	OOSP3	Oocyte-secreted protein 3			19557400
A0A494C030	A0A494C030_HUMAN	LOC114841035	Uncharacterized protein							197947			120149
A0A494C0N9;A0A494C0Y3	F246A_HUMAN;F246B_HUMAN	FAM246A;FAM246B	Protein FAM246B		2500050
A0A494C0Z2;A0A494C191;P0DTA3;P0DUD1;P0DUD2;P0DUD3;P0DUD4;P0DUX0	SPD10_HUMAN;SPD11_HUMAN;SPD13_HUMAN;SPD14_HUMAN;SPD15_HUMAN;SPD17_HUMAN;SPD8_HUMAN;SPD9_HUMAN	SPDYE10;SPDYE11;SPDYE13;SPDYE14;SPDYE15;SPDYE17;SPDYE8;SPDYE9	Putative speedy protein E13			873299	869356		818979		886741
A0A494C1I1	A0A494C1I1_HUMAN	LOC124900388	Uncharacterized protein			209415
A0A539	TVB42_HUMAN	TRBV4-2	T cell receptor beta variable 4-2									2970980
A0A5B7	TVB29_HUMAN	TRBV29-1	T cell receptor beta variable 29-1	353014		631885
A0A5B9	TRBC2_HUMAN	TRBC2	T cell receptor beta constant 2								345332
A0A6I8PU40	TUG1_HUMAN	TUG1	Taurine up-regulated 1 protein					342822
A0A6Q8PFD8	A0A6Q8PFD8_HUMAN	LOC128092246	Uncharacterized protein				358090				405555		418774	389541
A0A7I2V3R4	RN228_HUMAN	RNF228	RING finger protein 228							1316230
A0A7I2V4U8	A0A7I2V4U8_HUMAN	LOC128031834	Uncharacterized protein							533582				584813
A0A7L8Y648	MIAC_HUMAN	AQP5-AS1	Micropeptide inhibiting actin cytoskeleton							7430730					2559560
A0A804HI29	A0A804HI29_HUMAN	LOC127903862	Uncharacterized protein										1103170		976648
A0A8I5KTY6	A0A8I5KTY6_HUMAN	ZKSCAN8P1	HCG1646484			321031									316673
A0A8I5KY20	CC92B_HUMAN	CCDC92B	Coiled-coil domain-containing 92B			4524460
A0A8I5QJV6	A0A8I5QJV6_HUMAN		Uncharacterized protein	1013700
A0A8I5QKQ9	A0A8I5QKQ9_HUMAN		Uncharacterized protein										795795
A0A8V8TND5	A0A8V8TND5_HUMAN		Uncharacterized protein				291430		289573		300158	300204		296684
A0A8V8TPC4	A0A8V8TPC4_HUMAN		Uncharacterized protein									60661.3
A0A994J5G1	A0A994J5G1_HUMAN	TUBA3FP	Tubulin alpha 3f pseudogene			645425		604006						184534
A0A9L9PY30	A0A9L9PY30_HUMAN		Uncharacterized protein	171382			297246
A0A9L9PY38	A0A9L9PY38_HUMAN		Uncharacterized protein				3948900			4887560		5028830	3964020
A0AVF1	IFT56_HUMAN	IFT56	Intraflagellar transport protein 56	2268300	38582900	1995700	1847670	1953750	2534790	1784920	1886900	2177020	1629090	1585700	1911350
A0AVT1	UBA6_HUMAN	UBA6	Ubiquitin-like modifier-activating enzyme 6	44663500	45274100	44417700	45291300	44954900	44690800	45313900	45359500	45432900	45986700	45750600	44914500
A0FGR8	ESYT2_HUMAN	ESYT2	Extended synaptotagmin-2	30968600	31060000	30959300	33076400	30716400	32224800	29310200	30825500	30180500	31943200	30328300	31479600
A0JLT2	MED19_HUMAN	MED19	Mediator of RNA polymerase II transcription subunit 19	2111020	1685500	1786330	1692150	2596750	1882080	3057670	2816070	1891620	2785190	2619720	3703190
A0JNW5	BLT3B_HUMAN	BLTP3B	Bridge-like lipid transfer protein family member 3B	2517760	2645630	2934940	2644550	2870830	2925500	2474360	2516880	2534980	2504370	2414960	2312680
A0MZ66	SHOT1_HUMAN	SHTN1	Shootin-1	14979600	16163500	15499100	16090700	15332400	16165800	15137700	15860100	14984200	15370000	14119900	15499500
A0N4X2	A0N4X2_HUMAN	TRAJ40	Possible J 40 gene segment (Fragment)							1226450
A0N4X5	A0N4X5_HUMAN	TRAJ34	HCG2039756 (Fragment)				1064080							269057
A0N4Z3	A0N4Z3_HUMAN	TRAJ14	HCG2039775 (Fragment)	380905								1345500	516228
A0N4Z7	A0N4Z7_HUMAN	TRAJ10	Possible J 10 gene (Fragment)								281505
A0PG75	PLS5_HUMAN	PLSCR5	Phospholipid scramblase family member 5				662652	449039			374968	386468		345001
A0PJE2	DHR12_HUMAN	DHRS12	Dehydrogenase/reductase SDR family member 12												3557920
A0PJW6	TM223_HUMAN	TMEM223	Transmembrane protein 223	916421	862172	1305070	1255050	1267890	1216950	1097940	1218160	1366030	1060590	1227500	1202410
A0PJW8	DAPL1_HUMAN	DAPL1	Death-associated protein-like 1			100295				96659.9	154496
A0PJX2	TLDC2_HUMAN	TLDC2	TLD domain-containing protein 2				408077
A0PJZ0	A20A5_HUMAN	ANKRD20A5P	Putative ankyrin repeat domain-containing protein 20A5				109718		93855.6
A0PK00	T120B_HUMAN	TMEM120B	Transmembrane protein 120B	3562780						2936540			3566600
A0PK11	CLRN2_HUMAN	CLRN2	Clarin-2									482705
A0ZSE6	CC50C_HUMAN	TMEM30CP	Cell cycle control protein 50C			382274			55367
A1A4G5	LNP1_HUMAN	LNP1	Leukemia NUP98 fusion partner 1						631140
A1A4S6	RHG10_HUMAN	ARHGAP10	Rho GTPase-activating protein 10	9533010	9596200	9530330	9300590	9929440	9367980	9364040	9245240	9704340	9459940	9695560	9707380
A1IGU5	ARH37_HUMAN	ARHGEF37	Rho guanine nucleotide exchange factor 37						200801
A1L0T0	HACL2_HUMAN	ILVBL	2-hydroxyacyl-CoA lyase 2	25733300	26230100	28310900	28058300	28360700	28045600	25712500	24704500	26688100	25910000	26660600	25742600
A1L168	CT202_HUMAN	C20orf202	Uncharacterized protein C20orf202		523778
A1L390	PKHG3_HUMAN	PLEKHG3	Pleckstrin homology domain-containing family G member 3	2675740	2653250	2569940	2484280	2693480	2434060	2606590	2454060	2685310	2476610	2869780	2349570
A1L3X4	MT1DP_HUMAN	MT1DP	Putative metallothionein MT1DP				513468				462105			286215	512774
A1L429;A6NDE8;O76087;P0CL80;P0CL81;P0CL82;P0DSO3;P0DTW1;Q4V326	GAG2E_HUMAN;GAGE1_HUMAN;GAGE4_HUMAN;GAGE7_HUMAN;GG12C_HUMAN;GG12F_HUMAN;GG12G_HUMAN;GG12H_HUMAN;GG12I_HUMAN	GAGE1;GAGE12E;GAGE12F;GAGE12G;GAGE12H;GAGE12I;GAGE2E;GAGE4;GAGE7	G antigen 12B/C/D/E				13177800				12857000
A1L453	PRS38_HUMAN	PRSS38	Serine protease 38								398714
A1X283	SPD2B_HUMAN	SH3PXD2B	SH3 and PX domain-containing protein 2B	24321200	23211700	24585200	24664400	26043900	23451800	25053200	24712000	25672500	25672200	22673100	23045600
A1XBS5	CBAR1_HUMAN	CIBAR1	CBY1-interacting BAR domain-containing protein 1	327656	367492	341680	360776	367372	293393	377180	293761	297756	243407	359720	354072
A2A2Y4	FRMD3_HUMAN	FRMD3	FERM domain-containing protein 3	441048	150115	173888	154077		169684	154106			159268		139254
A2NJV5	KV229_HUMAN	IGKV2-29	Immunoglobulin kappa variable 2-29											14177300
A2RRP1	NBAS_HUMAN	NBAS	NBAS subunit of NRZ tethering complex	17542200	18093200	17815700	18060200	17321400	18315500	16964900	18124400	17181700	17601400	17251000	17756100
A2RTX5	SYTC2_HUMAN	TARS3	Threonine--tRNA ligase 2, cytoplasmic		21985400
A2RU37	CI170_HUMAN	LINC02872	Uncharacterized protein encoded by LINC02872			3268820									1998310
A2RU67	F234B_HUMAN	FAM234B	Protein FAM234B	465525	440425	8089820	1361090	1914300	11558800	350747	2687390	1985820	372039	347887	354486
A2RUC4	TYW5_HUMAN	TYW5	tRNA wybutosine-synthesizing protein 5	1398390	2044900	5779190	4258470	1408170	1110760	6567930	1568360	6917970	7885570	6273660	8141830
A2RUH7	MBPHL_HUMAN	MYBPHL	Myosin-binding protein H-like	277553	270790		268989	197897		264402		183980			211145
A2RUS2	DEND3_HUMAN	DENND3	DENN domain-containing protein 3	1897990	1811970	2166670	2443560	2136320	2054790	1878590	2015720	1827100	1843010	1748470	1881010
A2VCK2	DCD2B_HUMAN	DCDC2B	Doublecortin domain-containing protein 2B			5481370
A3KMH1	VWA8_HUMAN	VWA8	von Willebrand factor A domain-containing protein 8	20407400	20319300	21143200	19444200	21700500	20417100	20934000	19033400	20650500	19132600	20214900	18844300
A3KN83	SBNO1_HUMAN	SBNO1	Protein strawberry notch homolog 1	9925960	9028310	10989500	8967460	10716000	9599030	10258600	9177170	9847290	9519300	9926440	8834040
A3QJZ7	PRA27_HUMAN	PRAMEF27	PRAME family member 27				1093410
A4D1E9	GTPBA_HUMAN	GTPBP10	GTP-binding protein 10	9551480	8481360	10708400	9767450	10377700	9952230	8926410	8082600	9667700	7898100	10020500	8112710
A4D1P6	WDR91_HUMAN	WDR91	WD repeat-containing protein 91	4950200	5738430	5114460	5465590	5467120	5513380	5007220	5320010	5470980	5443860	4877600	4982200
A4D1U4	DEN11_HUMAN	DENND11	DENN domain-containing protein 11	2134560		1742730	1900690	1148840	1808970			1544920	1736170	1672640
A4D250	BLACE_HUMAN	BLACE	B-cell acute lymphoblastic leukemia-expressed protein	735096	352963		495339					399336
A4D2B0	MBLC1_HUMAN	MBLAC1	Metallo-beta-lactamase domain-containing protein 1	1367350	1910670	1320940	1419340	1609600		1965530	1535650	1496500	1448910	1209260	1543990
A4GXA9	EME2_HUMAN	EME2	Probable crossover junction endonuclease EME2								1938490
A4QMS7	CFA90_HUMAN	CFAP90	Cilia- and flagella-associated protein 90						1728930
A4QN01	CJ040_HUMAN	LINC01553	Putative uncharacterized protein encoded by LINC01553			4465040	1948930			2780740
A5D6W6	FITM1_HUMAN	FITM1	Fat storage-inducing transmembrane protein 1						1327440
A5D8T8;Q6UXF7;Q8NCF0	CL18A_HUMAN;CL18B_HUMAN;CL18C_HUMAN	CLEC18A;CLEC18B;CLEC18C	C-type lectin domain family 18 member A	4307990
A5D8V6	VP37C_HUMAN	VPS37C	Vacuolar protein sorting-associated protein 37C	210276	232931	273724	204134	335947	252513	241428	227857	271682	236210	220679	283514
A5PLL7	PDES1_HUMAN	PEDS1	Plasmanylethanolamine desaturase 1	8757920	7934050	8251270	9121880	9056920	8846950	9200160	9152290	9300490	9625900	8658410	10486100
A5PLN9	TPC13_HUMAN	TRAPPC13	Trafficking protein particle complex subunit 13	2499980	2626190	2945170	2986890		2733610	2509560	3109840	2174670	3161100	3318080	2787200
A5YKK6	CNOT1_HUMAN	CNOT1	CCR4-NOT transcription complex subunit 1	78828100	78954200	79296100	80141700	81200800	78805900	80006400	78327000	79655100	80772100	79181200	77814800
A6NCE7	MP3B2_HUMAN	MAP1LC3B2	Microtubule-associated proteins 1A/1B light chain 3 beta 2	46378200	45909000	52010300	55544200	58598100	58153700	44119100	44413400	46333900	46131600	47037500	46806000
A6NCI4	VWA3A_HUMAN	VWA3A	von Willebrand factor A domain-containing protein 3A	449729	573759	2695960	1563040	2972470	634903	477960	1390060		1665320	949277
A6NCJ1	TKTI1_HUMAN	TEKTIP1	Tektin bundle-interacting protein 1	271700	421092	394588	429616	381913	474174	428050	372890		351615	300326	359544
A6NCN2	KR87P_HUMAN	KRT87P	Putative keratin-87 protein	6291250	5853600	6818570	619557	1785920	590012	3912930	7602600	2068140	3315590
A6NCQ9	RN222_HUMAN	RNF222	RING finger protein 222		575122		687358	773452		688574		614868	799206	587308
A6NCS4	NKX26_HUMAN	NKX2-6	Homeobox protein Nkx-2.6	371562		871501					992049	667451	416422	846438
A6ND01	JUNO_HUMAN	IZUMO1R	Sperm-egg fusion protein Juno				448564			484988	496667	439749	392679	379797	373576
A6ND36	FA83G_HUMAN	FAM83G	Protein FAM83G	391940	400254	519335	402848	555070	482659	492253	402825	481279	412592	440871	349466
A6ND91	ASPDH_HUMAN	ASPDH	Aspartate dehydrogenase domain-containing protein												2092740
A6NDA9	LRIT2_HUMAN	LRIT2	Leucine-rich repeat, immunoglobulin-like domain and transmembrane domain-containing protein 2				209578
A6NDD5	SYN1L_HUMAN	SYNDIG1L	Synapse differentiation-inducing gene protein 1-like					273657				287602			299208
A6NDG6	PGP_HUMAN	PGP	Glycerol-3-phosphate phosphatase	112913000	121295000	122112000	121878000	120420000	125782000	110840000	117381000	117623000	117365000	115434000	124728000
A6NDL8	O6C68_HUMAN	OR6C68	Olfactory receptor 6C68					2942040
A6NDU8	RIMC1_HUMAN	RIMOC1	RAB7A-interacting MON1-CCZ1 complex subunit 1	13000900	14026200	13118000	12279700	13300300	13235400	12657000	14155000	13455000	12950900	13861200	12961900
A6NDV4	TMM8B_HUMAN	TMEM8B	Transmembrane protein 8B												162725
A6NDX4	YO011_HUMAN		Putative transmembrane protein ENSP00000320207										1968230
A6NE02	BTBDH_HUMAN	BTBD17	BTB/POZ domain-containing protein 17								1650570				1236000
A6NED2	RCCD1_HUMAN	RCCD1	RCC1 domain-containing protein 1	433159	432992	639819	585017	605510	595885	429991	481517	601025	506138	648357	425579
A6NEH6	TM247_HUMAN	TMEM247	Transmembrane protein 247	334102	318008	268682	387106		354412	272878		213645		426753
A6NEK1	ARRD5_HUMAN	ARRDC5	Arrestin domain-containing protein 5								661986
A6NEL3	F86C2_HUMAN	FAM86C2P	Putative protein FAM86C2P										3056840
A6NER3	GG12J_HUMAN	GAGE12J	G antigen 12J					111627	124500
A6NEY8	PRXD1_HUMAN	PRORSD1P	Putative prolyl-tRNA synthetase associated domain-containing protein 1		334921
A6NF89	OR6C6_HUMAN	OR6C6	Olfactory receptor 6C6		129186	304630			398703			147328	135946
A6NFD8	HELT_HUMAN	HELT	Hairy and enhancer of split-related protein HELT		11483200		312075
A6NFI3	ZN316_HUMAN	ZNF316	Zinc finger protein 316	1080310	1012210	1100070	1061760	1056130	1029140	842746	982601	959670	1174800	990467	939665
A6NFQ2	TCAF2_HUMAN	TCAF2	TRPM8 channel-associated factor 2	2646040	3041110	2981710	3657270	2973990	3845150	2481620	3609020	3129020	3539990	2539850	3294090
A6NFT4	CFA73_HUMAN	CFAP73	Cilia- and flagella-associated protein 73			365070
A6NFU0	F187A_HUMAN	FAM187A	Ig-like V-type domain-containing protein FAM187A		6665780						6877340		6103810
A6NFU8	PGPIL_HUMAN	PGPEP1L	Pyroglutamyl-peptidase 1-like protein								2179890
A6NGB0	T191C_HUMAN	TMEM191C	Transmembrane protein 191C				89521.2
A6NGD5	ZSA5C_HUMAN	ZSCAN5C	Zinc finger and SCAN domain-containing protein 5C						126055
A6NGE4	DC8L1_HUMAN	DCAF8L1	DDB1- and CUL4-associated factor 8-like protein 1	1229420	525954							448117
A6NGS2	ERIC4_HUMAN	ERICH4	Glutamate-rich protein 4				184733
A6NGY3	CE052_HUMAN	C5orf52	Uncharacterized protein C5orf52	615003		490053	371214		308928
A6NH21	SERC4_HUMAN	SERINC4	Serine incorporator 4				356731
A6NHJ4	ZN860_HUMAN	ZNF860	Zinc finger protein 860								520953
A6NHL2	TBAL3_HUMAN	TUBAL3	Tubulin alpha chain-like 3	1965200000	1887250000	2485220000	2326700000	2460870000	2360220000	2237170000	1987140000	2118870000	2161510000	2041530000	2106430000
A6NHP3;Q495Y8	SPDE2_HUMAN;SPE2B_HUMAN	SPDYE2;SPDYE2B	Speedy protein E2B				50261.9
A6NHQ2	FBLL1_HUMAN	FBLL1	rRNA/tRNA 2'-O-methyltransferase fibrillarin-like protein 1			509741	2189760	2233640
A6NHQ4	EPOP_HUMAN	EPOP	Elongin BC and Polycomb repressive complex 2-associated protein									31241700		26029100
A6NHR9	SMHD1_HUMAN	SMCHD1	Structural maintenance of chromosomes flexible hinge domain-containing protein 1	13847000	12664400	14153900	12558000	14042800	12847700	13970800	12778300	14121300	12496200	13775400	12352900
A6NHX0	CAST2_HUMAN	CASTOR2	Cytosolic arginine sensor for mTORC1 subunit 2	2657050	2231390	2592690	2706480	2523180	2563710	2858540	2336840	2257700	2295070	2323070	2193800
A6NHY2	AKD1B_HUMAN	ANKDD1B	Ankyrin repeat and death domain-containing protein 1B												341365
A6NI61	MYMK_HUMAN	MYMK	Protein myomaker	173096
A6NI72	NCF1B_HUMAN	NCF1B	Putative neutrophil cytosol factor 1B						19723900
A6NI79	CCD69_HUMAN	CCDC69	Coiled-coil domain-containing protein 69					159795
A6NIE6	RN3P2_HUMAN	RRN3P2	Putative RRN3-like protein RRN3P2	636493		811812	829028	1053350	730263	782094	737898	794952	675582	726983	694084
A6NIE9	PRS29_HUMAN	PRSS29P	Putative serine protease 29			119262	1756930		242775					176001
A6NIH7	U119B_HUMAN	UNC119B	Protein unc-119 homolog B	6874980	7028010	7174650	7247920	7307520	7265960	7338090	7297590	7298710	7591100	7240580	7229190
A6NIJ5	F90AK_HUMAN	FAM90A20	Protein FAM90A20											5780290
A6NIJ9	O6C70_HUMAN	OR6C70	Olfactory receptor 6C70									260500
A6NIX2	WTIP_HUMAN	WTIP	Wilms tumor protein 1-interacting protein	141130	120801	204448	202792	190716	239595	196946	173988	152828	175196		164712
A6NIZ1	RP1BL_HUMAN	RAP1BL	Ras-related protein Rap-1b-like protein	140088000	146228000	130587000	135439000	124408000	123684000	131975000	131207000	123111000	116297000	130841000	130742000
A6NJ69	IGIP_HUMAN	IGIP	IgA-inducing protein homolog				1280690	5342600	934763				1100520	1209970
A6NJ78	MET15_HUMAN	METTL15	12S rRNA N4-methylcytidine (m4C) methyltransferase	2779680	2666410	2827240	2589960	2935180	2510340	2804310	2524600	3043040	2352760	2955000	2472770
A6NJI1	CK086_HUMAN	C11orf86	Uncharacterized protein C11orf86		113038	111924	174094
A6NJQ4;A6NNJ1;P0DV73;P0DV74;P0DV75;P0DV76	F90A8_HUMAN;F90A9_HUMAN;F90AG_HUMAN;F90AH_HUMAN;F90AI_HUMAN;F90AJ_HUMAN	FAM90A16;FAM90A17;FAM90A18;FAM90A19;FAM90A8;FAM90A9	Putative protein FAM90A8							591999
A6NJT0	UNC4_HUMAN	UNCX	Homeobox protein unc-4 homolog				263721		232480
A6NJY1	SL9P1_HUMAN	SLC9B1P1	Putative SLC9B1-like protein SLC9B1P1					91726.5						2056180
A6NK89	RASFA_HUMAN	RASSF10	Ras association domain-containing protein 10			797771
A6NKC9	SH2D7_HUMAN	SH2D7	SH2 domain-containing protein 7				384803	640175	969660	1502410	280143	614020	405843
A6NKD9	CC85C_HUMAN	CCDC85C	Coiled-coil domain-containing protein 85C	1549730	1339300	1635700	1419490	1680450	1438500	1538170	1385800	1353220	1348130	1172010	1271470
A6NKF1	SAC31_HUMAN	SAC3D1	SAC3 domain-containing protein 1	3537660	3830350	3754240	3227560	3679410	3622070	2864450	2939830	3638790		3162800	3241220
A6NKQ9	CGB1_HUMAN	CGB1	Choriogonadotropin subunit beta variant 1		53816.9			58112.3	50078.3			58696.9		63591.1	76712.4
A6NKX4	S22AV_HUMAN	SLC22A31	Putative solute carrier family 22 member 31					215649						277115
A6NL08	O6C75_HUMAN	OR6C75	Olfactory receptor 6C75					2106200
A6NL99	AQP73_HUMAN	AQP7P3	Putative aquaporin-7-like protein 3								145954			115405
A6NLI5	TR64C_HUMAN	TRIM64C	Tripartite motif-containing protein 64C	4225650		3047670	2973530	1300010	5481140	4931820	1650850		4128230	1549620	2065500
A6NLU5	VTM2B_HUMAN	VSTM2B	V-set and transmembrane domain-containing protein 2B	229913
A6NLX4	TM210_HUMAN	TMEM210	Transmembrane protein 210	37242200
A6NM03	O2AG2_HUMAN	OR2AG2	Olfactory receptor 2AG2										717075
A6NM76	O6C76_HUMAN	OR6C76	Olfactory receptor 6C76		532419	1293920	678728
A6NML5	TM212_HUMAN	TMEM212	Transmembrane protein 212					228835
A6NMT0	DBX1_HUMAN	DBX1	Homeobox protein DBX1											13027000
A6NN73	GOG8C_HUMAN	GOLGA8CP	Golgin subfamily A member 8C						282016				204048
A6NNA5	DRGX_HUMAN	DRGX	Dorsal root ganglia homeobox protein	111864	60995.9	211968	217044		240757		119983	163833	188537
A6NNB3	IFM5_HUMAN	IFITM5	Interferon-induced transmembrane protein 5					458029		526050			455989
A6NNC1	P12LL_HUMAN		Putative POM121-like protein 1-like			212282						1283660		559131
A6NNL5	CO061_HUMAN	C15orf61	Uncharacterized protein C15orf61	1152380	1184380
A6NNN8	S38A8_HUMAN	SLC38A8	Solute carrier family 38 member 8		1177490							585146
A6NNY8	UBP27_HUMAN	USP27X	Ubiquitin carboxyl-terminal hydrolase 27		665460			861558				570007	700120		532247
A6NP61	ZAR1L_HUMAN	ZAR1L	Protein ZAR1-like			640004	943723		980504
A6PVY3	F177B_HUMAN	FAM177B	Protein FAM177B								10438000
A7E2V4	ZSWM8_HUMAN	ZSWIM8	Zinc finger SWIM domain-containing protein 8	20186000	19817400	20168600	19727000	20176300	20100300	19391000	18653200	20020900	19040900	18514100	19332900
A8CG34	P121C_HUMAN	POM121C	Nuclear envelope pore membrane protein POM 121C	11272200	10943900	12329700	11983800	11549300	10444800	10717400	10803700	11143000	11026900	11462400	9559430
A8K0R7	ZN839_HUMAN	ZNF839	Zinc finger protein 839					314277
A8K0Z3	WASH1_HUMAN	WASHC1	WASH complex subunit 1	8346820	10095700	8204280	8424460	7950210	8441330	9009240	9288990	8048590	7969770	9073060	7686180
A8K554	ZN815_HUMAN	ZNF815P	Putative protein ZNF815						166275		163888
A8MPP1	D11L8_HUMAN	DDX11L8	Putative ATP-dependent RNA helicase DDX11-like protein 8				95954.3
A8MPY1	GBRR3_HUMAN	GABRR3	Gamma-aminobutyric acid receptor subunit rho-3								132737
A8MSI8	LYRM9_HUMAN	LYRM9	LYR motif-containing protein 9		228417	298820		202355
A8MT69	CENPX_HUMAN	CENPX	Centromere protein X		1047400	854099	949059	851191	843937		838410		758204
A8MTJ3	GNAT3_HUMAN	GNAT3	Guanine nucleotide-binding protein G(t) subunit alpha-3		632040		3083160
A8MTL9	HMSD_HUMAN	HMSD	Serpin-like protein HMSD				216300	190135	144769				115654	142577
A8MTT3	CEBOS_HUMAN	CEBPZOS	Protein CEBPZOS		779436	1111810	783359		947789	1102610		924257	945815	962824	863206
A8MTY0	ZN724_HUMAN	ZNF724	Zinc finger protein 724	1070930						198975
A8MU46	SMTL1_HUMAN	SMTNL1	Smoothelin-like protein 1			3687160	3181900	10599100		8711740
A8MUA0	YB057_HUMAN		Putative UPF0607 protein ENSP00000381514							186500	210724
A8MUN3	YQ048_HUMAN		Putative uncharacterized protein ENSP00000381830								337919
A8MUU1	FB5L3_HUMAN	FABP5P3	Putative fatty acid-binding protein 5-like protein 3								68956.5
A8MUV8	ZN727_HUMAN	ZNF727	Putative zinc finger protein 727		129052		157996	200296	203085			89505.8	131178
A8MV23	SERP3_HUMAN	SERPINE3	Serpin E3		458122	695654		586370						570067
A8MV24	SPMA1_HUMAN	SPMAP1	Sperm microtubule associated protein 1									584659
A8MV81	HIG1C_HUMAN	HIGD1C	HIG1 domain family member 1C	721188	664888	631545	661903	644085	701219	694502		651504			657027
A8MVW0	F1712_HUMAN	FAM171A2	Protein FAM171A2	278572	300804	263807	327064	282462	319986	286554	260341	275709	309594	271960	330330
A8MW92	P20L1_HUMAN	PHF20L1	PHD finger protein 20-like protein 1	1922840		2181090		2078820	1614030	1928700	1418530	1927300		1904360	1548430
A8MWD9	RUXGL_HUMAN	SNRPGP15	Putative small nuclear ribonucleoprotein G-like protein 15	183855000	212830000	171942000	171245000	180741000	190272000	183432000	189441000	181335000	195733000	221778000	193216000
A8MWL7;Q9NUH8	TM14B_HUMAN;TM14D_HUMAN	TMEM14B;TMEM14DP	Transmembrane protein 14DP		57568.4
A8MWP4	YU008_HUMAN		Putative uncharacterized protein ENSP00000401716						128029				181537
A8MWX3	WASH4_HUMAN	WASH4P	Putative WAS protein family homolog 4	17735200	17637400	20506700	22123800	20656600	19842400	17466300	18725600	18897700	18353900	15650900	16314800
A8MXD5	GRCR1_HUMAN	GRXCR1	Glutaredoxin domain-containing cysteine-rich protein 1				2704050	2434220					2756930
A8MXK1	VSTM5_HUMAN	VSTM5	V-set and transmembrane domain-containing protein 5										759927
A8MXU0	DB108_HUMAN	DEFB108C	Putative beta-defensin 108A									42554.2
A8MXV4	NUD19_HUMAN	NUDT19	Acyl-coenzyme A diphosphatase NUDT19	59559400	59421500	62823900	62962900	63729000	62009900	61328900	60874600	55757300	59869400	63584800	60917000
A8MYA2	CX049_HUMAN	CXorf49B	Uncharacterized protein CXorf49	3955670		786377					1645170
A8MZ26	EFCB9_HUMAN	EFCAB9	EF-hand calcium-binding domain-containing protein 9							259696
A8MZ36	EVPLL_HUMAN	EVPLL	Envoplakin-like protein	1834580	1455560	1678970	1661960	1821990	1607630	1636250		1569930	1767750	1275820
A8MZ97	CB074_HUMAN	C2orf74	Uncharacterized protein C2orf74										1335530
A8MZA4	GG6L6_HUMAN	GOLGA6L6	Golgin subfamily A member 6-like protein 6	453488	430047	431379	424851	444617	462587		460484	494127	421961	401493
A8MZH6	OOSP1_HUMAN	OOSP1	Putative oocyte-secreted protein 1 homolog	242450					256782						178457
A9UHW6	MI4GD_HUMAN	MIF4GD	MIF4G domain-containing protein	5918330	7189050	6992700	8780310	6287540	6378270	5607180	6165460	6819960	6451800	7315190	6340460
B0FP48;E5RIL1	UPK3L_HUMAN;UPKL2_HUMAN	UPK3BL1;UPK3BL2	Uroplakin-3b-like protein 1							2074740
B0YJ81	HACD1_HUMAN	HACD1	Very-long-chain (3R)-3-hydroxyacyl-CoA dehydratase 1	1203440	1578310	1539600	1326350	1102650	1449940	1201710	1432770	1292080	1307700	1553400	1209510
B1AK76	SNUFL_HUMAN	SNURFL	Putative SNURF-like protein		2006880			2779440					2602630	2230440
B1AL46	NTM2E_HUMAN	NUTM2E	NUT family member 2E						151500
B1AMM8	CI107_HUMAN	LINC00587	Putative uncharacterized protein encoded by LINC00587											61963.4
B1ANH7	IBADT_HUMAN	IBA57-DT	Putative uncharacterized protein IBA57-DT	4114710	4366960	5526040	5014800
B1APH4	ZN487_HUMAN	ZNF487	Putative zinc finger protein 487	172592		174683	131156		169214
B2RD01	CENP1_HUMAN	CENPBD1P	Putative CENPB DNA-binding domain-containing protein 1			292962		328866	389225			411809
B2RPK0	HGB1A_HUMAN	HMGB1P1	Putative high mobility group protein B1-like 1						102758			179623
B2RTY4	MYO9A_HUMAN	MYO9A	Unconventional myosin-IXa	2986450	2872150	2384440	3411900	2717740	3216330	2594240	3181150	3021260	3254390	3251830	2729970
B2RUZ4	SMIM1_HUMAN	SMIM1	Small integral membrane protein 1			109038	184871	115339	182474		109207	130876		102769	151712
B2RXH2	KDM4E_HUMAN	KDM4E	Lysine-specific demethylase 4E		339145			382529	362909
B3GLJ2	PATE3_HUMAN	PATE3	Prostate and testis expressed protein 3						4700880
B3KNS4	B3KNS4_HUMAN	ERVK3-1	Endogenous retrovirus group K3 member 1				153123
B4DH59	NBPFP_HUMAN	NBPF26	Neuroblastoma breakpoint family member 26	311310				286435
B4DJY2	TM233_HUMAN	TMEM233	Transmembrane protein 233	1946940		1827030	1925750	1883750	1778700			2185100			2743020
B4DS77	SHSA9_HUMAN	SHISA9	Protein shisa-9	1620030				1552090
B4DX44	ZN736_HUMAN	ZNF736	Zinc finger protein 736						1113340	1064870			1097990
B4DZS4;Q5H9J9	T11X1_HUMAN;T11X2_HUMAN	TCP11X1;TCP11X2	T-complex protein 11-like X-linked protein 1	1561270										1824010	2208410
B4E2M5	ANR66_HUMAN	ANKRD66	Ankyrin repeat domain-containing protein 66							2113510
B6A8C7	TARM1_HUMAN	TARM1	T-cell-interacting, activating receptor on myeloid cells protein 1	85908.5
B6SEH8;B6SEH9	ERVV1_HUMAN;ERVV2_HUMAN	ERVV-1;ERVV-2	Endogenous retrovirus group V member 1 Env polyprotein							4756710
B7ZAQ6;P0CG08	GPHRA_HUMAN;GPHRB_HUMAN	GPR89A;GPR89B	Golgi pH regulator A	5035320	4529980	5214130	5382570	5359080	4701910	4669440	4914460	5116950	5142280	4797670	5228920
B7ZLF3	B7ZLF3_HUMAN	LOC728743	C2H2-type domain-containing protein	122070	95109.5
C0HLV8	MP31_HUMAN	MLDHR	PTEN upstream open reading frame MP31					997521				1135330
C0HLZ6	HAS3P_HUMAN	HOXB-AS3	HOXB-AS3 peptide	1598020	1553510	1815270	2027700		1442540		1838100	1397780	1616840	1714950	1536930
C0HM01	RBRP_HUMAN	SEPTIN14P20	Putative RNA-binding regulatory peptide				41401000					39829500
C4AMC7;Q6VEQ5	WASH2_HUMAN;WASH3_HUMAN	WASH2P;WASH3P	Putative WAS protein family homolog 3	21856800	20657400	19454800	20937900	19980200	19641000	21133400	19277400	21554300	20919300	20646100	21400800
C9J069	AJM1_HUMAN	AJM1	Apical junction component 1 homolog	261500	6047220	2028050	1907680	2023540	1888850	1978170	1851320	1669860	2140290	1817730	1976720
C9J7I0	UMAD1_HUMAN	UMAD1	UBAP1-MVB12-associated (UMA)-domain containing protein 1	743677	702328	818584	640828	796426	676972	681436	525391	674262	533122	650477	533524
C9JLW8	MCRI1_HUMAN	MCRIP1	Mapk-regulated corepressor-interacting protein 1	40574800	40377100	40592300	38244800	38343300	38758100	40066500	40079400	41115800	41138800	39073300	36634000
C9JN71	ZN878_HUMAN	ZNF878	Zinc finger protein 878	162689	151025
C9JQI7	TM232_HUMAN	TMEM232	Transmembrane protein 232	4364100	5253250	503638		1089130			617580	67857.8	418435	654285	1801530
C9JR72	KBTBD_HUMAN	KBTBD13	Kelch repeat and BTB domain-containing protein 13					49807.3
D0EPY3	SIM47_HUMAN	SMIM47	Small integral membrane protein 47						106065		185661		1006010
D3DTV9	PRAC2_HUMAN	PRAC2	Putative protein PRAC2			1134580
E5RG02	PRS46_HUMAN	PRSS46P	Putative serine protease 46					377422000			493230000	383311000		267994000
E5RJM6	ANR65_HUMAN	ANKRD65	Ankyrin repeat domain-containing protein 65		13153800	19662900	17415700	20444200	19977200	19070000	17879600	16514900	17277000	14083500	19125900
E7ETH6	Z587B_HUMAN	ZNF587B	Zinc finger protein 587B					92803.1
E9PAV3	NACAM_HUMAN	NACA	Nascent polypeptide-associated complex subunit alpha, muscle-specific form	387321000	393439000	431687000	397481000	416416000	389614000	388821000	351209000	376900000	354255000	426254000	366677000
E9PJ23	NPIB6_HUMAN	NPIPB6	Nuclear pore complex-interacting protein family member B6				452872
E9PRG8	CK098_HUMAN	C11orf98	Uncharacterized protein C11orf98	22617600	20768700	24072600	21006600	23916000	22433000	22116600	20530100	23137600	20294700	23071200	21991200
F2Z3F1	CE067_HUMAN	C5orf67	Uncharacterized protein C5orf67								1083190
F2Z3M2	CQ112_HUMAN	LINC02876	Uncharacterized protein encoded by LINC02876				108160				109737
F8VTS6	RFAL1_HUMAN	RFPL4AL1	Ret finger protein-like 4A-like protein 1				1381920
G2XKQ0	SUMO5_HUMAN	SUMO1P1	Small ubiquitin-related modifier 5					1031240
G3V0H7	SO1B7_HUMAN	SLCO1B7	Putative solute carrier organic anion transporter family member 1B7							4768280
G3V523	G3V523_HUMAN	LOC730098	HCG2040265, isoform CRA_a		133916		158505
H0UI37	TSTD3_HUMAN	TSTD3	Thiosulfate sulfurtransferase/rhodanese-like domain-containing protein 3										1870740
H3BNL8	ARMD2_HUMAN	ARMH2	Armadillo-like helical domain-containing protein 2				107048
H3BQJ8	LY6L_HUMAN	LY6L	Lymphocyte antigen 6L								210396
H3BRN8	PIRC2_HUMAN	PIERCE2	Piercer of microtubule wall 2 protein							3677110
H3BS89	T178B_HUMAN	TMEM178B	Transmembrane protein 178B			550558
H3BV12	GOG8Q_HUMAN	GOLGA8Q	Golgin subfamily A member 8Q	1439850
H7BZ55	CRCC2_HUMAN	CROCC2	Ciliary rootlet coiled-coil protein 2	82123600	80450100	104825000	71201100	102449000	75439500	89081900	58115600	97102300	76329500	81290300	84542600
H7C241	CLD34_HUMAN	CLDN34	Claudin-34	311487	342435					367039	353543		268728
H7C350	CC188_HUMAN	CCDC188	Coiled-coil domain-containing protein 188												495042
I3L1E1	CS084_HUMAN	C19orf84	Uncharacterized protein C19orf84										106118		58197.8
I6L899	GOG8R_HUMAN	GOLGA8R	Golgin subfamily A member 8R					366826
L0R819	ASURF_HUMAN	ASDURF	ASNSD1 upstream open reading frame protein	7236150	6739070	7886830	7107160	7355010	7205080	7403790	7402110	7275300	6805450	7046740	6810760
O00115	DNS2A_HUMAN	DNASE2	Deoxyribonuclease-2-alpha	26392300	27612500	25369100	30392800	25343800	26463500	26300600	27393400	25648200	28771300	26764500	26632400
O00116	ADAS_HUMAN	AGPS	Alkyldihydroxyacetonephosphate synthase, peroxisomal	80479400	76635900	83360200	81235600	83450000	79536500	81229800	74296900	79135600	75577600	78537400	76460000
O00124	UBXN8_HUMAN	UBXN8	UBX domain-containing protein 8	721422	630392	835731	666433	831577	719841	579480	526688	693768	403485	516243	565058
O00139	KIF2A_HUMAN	KIF2A	Kinesin-like protein KIF2A	17103100	16921800	18053200	16070400	17454400	16359300	17378300	16232600	17219500	15693600	17068100	15575000
O00141	SGK1_HUMAN	SGK1	Serine/threonine-protein kinase Sgk1				642903
O00142	KITM_HUMAN	TK2	Thymidine kinase 2, mitochondrial	6723550	7058740	6314700	6431640	6476320	6800060	6513350	6622420	6365610	6835780	6480250	6222870
O00148	DX39A_HUMAN	DDX39A	ATP-dependent RNA helicase DDX39A	52271100	49185400	57882500	48269400	57940200	50522800	52470900	48577400	51671100	47694800	55000100	45855200
O00151	PDLI1_HUMAN	PDLIM1	PDZ and LIM domain protein 1	170183000	219218000	184593000	227238000	170898000	201890000	166659000	179670000	161074000	189338000	195049000	187489000
O00154	BACH_HUMAN	ACOT7	Cytosolic acyl coenzyme A thioester hydrolase	149231000	148684000	167320000	153376000	165019000	154872000	144584000	141408000	151085000	140158000	155953000	138000000
O00159	MYO1C_HUMAN	MYO1C	Unconventional myosin-Ic	95071500	106180000	95810200	113903000	95751200	110589000	95596200	107301000	92816500	111917000	93997600	108538000
O00161	SNP23_HUMAN	SNAP23	Synaptosomal-associated protein 23	35979600	39211500	40002300	43070200	40084800	44758900	37414600	40270800	35705000	39660900	34885000	41519600
O00165	HAX1_HUMAN	HAX1	HCLS1-associated protein X-1	3053130	2819260	2544740	2237260	2815310	2571260	2724520	2311270	3114890	2582160	2898320	2687610
O00170	AIP_HUMAN	AIP	AH receptor-interacting protein	49128100	49680000	52379400	52497600	51932800	52843700	46843500	48042000	47712700	47948200	46352000	46928700
O00178	GTPB1_HUMAN	GTPBP1	GTP-binding protein 1	18132100	19279600	20968500	22238200	21968200	22468600	21044400	19702400	20903500	18127400	19471600	20851200
O00186	STXB3_HUMAN	STXBP3	Syntaxin-binding protein 3	50612800	54173700	46601600	47268600	46040900	48124800	52827800	55076000	55767100	54012300	60468100	57034800
O00189	AP4M1_HUMAN	AP4M1	AP-4 complex subunit mu-1	2174640	2333960	2112230	2032380	2150990	2398400	2261190	2324160	2021340	2397120	2271210	2119480
O00192	ARVC_HUMAN	ARVCF	Splicing regulator ARVCF	2353430	2710000	1874310	1896390		3093990	2443530	2610920		3157150	2272660
O00193	SMAP_HUMAN	SMAP	Small acidic protein	70801200	102714000	64742700	61429900	62734600	55745200	107372000	57999100	66010700	54556100	61101200	99475000
O00194	RB27B_HUMAN	RAB27B	Ras-related protein Rab-27B	15287100	13271400	16421600	14738800	16300800	15323300	14962800	14849200	15620300	14294700	15177200	14240200
O00198	HRK_HUMAN	HRK	Activator of apoptosis harakiri	715318		2244220
O00203	AP3B1_HUMAN	AP3B1	AP-3 complex subunit beta-1	54974000	56594700	58014800	58214100	56843000	59137700	54175800	54704400	55348500	55741800	55956500	55429000
O00213	APBB1_HUMAN	APBB1	Amyloid beta precursor protein binding family B member 1	565828	763273	758334	718939	718056	733193	612751	727820	684774	617321	599022	640140
O00214	LEG8_HUMAN	LGALS8	Galectin-8	11740200	11658700	12182700	13279200	12328600	13022600	11551800	12162600	11667000	11694600	11851800	12050000
O00217	NDUS8_HUMAN	NDUFS8	NADH dehydrogenase [ubiquinone] iron-sulfur protein 8, mitochondrial	24244300	22939200	24452000	23897500	24760800	22608100	24163400	23227000	25324300	23604300	22845300	21538300
O00221	IKBE_HUMAN	NFKBIE	NF-kappa-B inhibitor epsilon		986848	981365	1395430		908449	695303	883351		807945	919825
O00230	CORT_HUMAN	CORT	Cortistatin		250059
O00231	PSD11_HUMAN	PSMD11	26S proteasome non-ATPase regulatory subunit 11	118092000	123781000	128791000	129795000	128636000	129881000	115799000	119584000	117190000	120743000	120443000	120372000
O00232	PSD12_HUMAN	PSMD12	26S proteasome non-ATPase regulatory subunit 12	111091000	113392000	108736000	108121000	106846000	111382000	108945000	109683000	110007000	111001000	107417000	110701000
O00233	PSMD9_HUMAN	PSMD9	26S proteasome non-ATPase regulatory subunit 9	50575900	50690800	50279300	49864600	50562700	50277500	50054000	50156000	50271200	48800800	50158400	52003600
O00241	SIRB1_HUMAN	SIRPB1	Signal-regulatory protein beta-1												3920690
O00244	ATOX1_HUMAN	ATOX1	Copper transport protein ATOX1	157222000	146958000	165614000	156072000	140184000	135811000	156134000	141681000	167834000	144154000	134577000	128790000
O00253	AGRP_HUMAN	AGRP	Agouti-related protein		516116	2864570	503932		713190	520000	1328310		2257780	2539920
O00255	MEN1_HUMAN	MEN1	Menin	877834	839909	854590	900860	900060	698887	839819	797233	888442	633226	852682	854523
O00257	CBX4_HUMAN	CBX4	E3 SUMO-protein ligase CBX4	1542220	1397830	1482010	1675600	1602890	1515320	1487950	1415700	1299320	1360220	1192120	1311740
O00258	GET1_HUMAN	GET1	Guided entry of tail-anchored proteins factor 1	4032890	3957230	5717190	5939980	5712760	6135160	4432150	4405230	4996120	4322920	4307200	3975240
O00264	PGRC1_HUMAN	PGRMC1	Membrane-associated progesterone receptor component 1	61923600	54208500	55243800	45462100	54868100	46287600	56241700	52727400	48046700	62859800	50751100	60688800
O00267	SPT5H_HUMAN	SUPT5H	Transcription elongation factor SPT5	20625400	20447100	21366500	21193900	21832800	21607400	21071600	21445500	21327900	20380500	21095100	20385700
O00268	TAF4_HUMAN	TAF4	Transcription initiation factor TFIID subunit 4	16868200	14462500	15490700	14721300	15217300	12343000	12845300	12869800	12783000	9950810	15257400
O00270	GPR31_HUMAN	GPR31	12-(S)-hydroxy-5,8,10,14-eicosatetraenoic acid receptor	193898			221802				984105
O00273	DFFA_HUMAN	DFFA	DNA fragmentation factor subunit alpha	31155300	30981700	32907700	32211500	31565200	31432900	31082900	28866200	30918100	30189800	30627800	31330300
O00287	RFXAP_HUMAN	RFXAP	Regulatory factor X-associated protein	221828	232821	247396	277652	248852	238692	192467	250159	214378	258482	183740	210747
O00291	HIP1_HUMAN	HIP1	Huntingtin-interacting protein 1	10115400	8751740	9938710	9838540	9971930	10106700	9271200	8979380	10456000	8553680	10640200	9231980
O00299	CLIC1_HUMAN	CLIC1	Chloride intracellular channel protein 1	931125000	1001960000	953943000	946755000	926073000	933808000	988181000	1074720000	937613000	991942000	990890000	997908000
O00303	EIF3F_HUMAN	EIF3F	Eukaryotic translation initiation factor 3 subunit F	105516000	98762800	119442000	113778000	101006000	109283000	102131000	94688100	109227000	111311000	108261000	102559000
O00305	CACB4_HUMAN	CACNB4	Voltage-dependent L-type calcium channel subunit beta-4	102390			122123	66657.6	169821	103814	114533	122347	105549		110500
O00308	WWP2_HUMAN	WWP2	NEDD4-like E3 ubiquitin-protein ligase WWP2	2282130	2567110	2335980	1721130	2236950	2439670	2603100	2372260	2292500	2152580	2898280	2619660
O00321	ETV2_HUMAN	ETV2	ETS translocation variant 2				95916.3						71643
O00329	PK3CD_HUMAN	PIK3CD	Phosphatidylinositol 4,5-bisphosphate 3-kinase catalytic subunit delta isoform	3501540	3184250	3420370	3760830	3348930	3062480	3431210	3402840	3513860	3489610	3351200	3308850
O00330	ODPX_HUMAN	PDHX	Pyruvate dehydrogenase protein X component, mitochondrial	15250800	14477900	15596800	15397500	15922000	15600400	14996900	14513600	15085200	14910700	15083400	14458300
O00337	S28A1_HUMAN	SLC28A1	Sodium/nucleoside cotransporter 1					28723600
O00391	QSOX1_HUMAN	QSOX1	Sulfhydryl oxidase 1	32526900	10782300	9242580	12256000	20206100	12184700	11487900	11651300	10185200	11318800	9817730	10515500
O00399	DCTN6_HUMAN	DCTN6	Dynactin subunit 6	32228800	32916100	33820700	32545400	33216900	33443800	33303700	30118300	32997700	31657300	30478100	32840400
O00400	ACATN_HUMAN	SLC33A1	Acetyl-coenzyme A transporter 1	16509800	17526700	17308300	19258600	16614400	17833300	17162500	16674400	16549600	17776900	16641400	18245800
O00401	WASL_HUMAN	WASL	Actin nucleation-promoting factor WASL	26400300	32797700	30908300	29663900	14796700	29309300	42629500	14854600	43011000	17182900	23755400	43402100
O00408	PDE2A_HUMAN	PDE2A	cGMP-dependent 3',5'-cyclic phosphodiesterase	571108	2985040	3309350	1004810	1351720	1480050	480830	392993		4910860	471700
O00410	IPO5_HUMAN	IPO5	Importin-5	135954000	143651000	150917000	143819000	149943000	145929000	141651000	127830000	134377000	124022000	140816000	130452000
O00411	RPOM_HUMAN	POLRMT	DNA-directed RNA polymerase, mitochondrial	3159110	2703010	3484660	2653340	3379520	2868210	3394470	2767690	3144310	2413590	3026640	3003920
O00418	EF2K_HUMAN	EEF2K	Eukaryotic elongation factor 2 kinase	9305680	9608230	9090100	9167460	8580780	9394340	9070950	9351530	9092920	9774600	8294220	9554360
O00421	CCRL2_HUMAN	CCRL2	C-C chemokine receptor-like 2												64352.2
O00422	SAP18_HUMAN	SAP18	Histone deacetylase complex subunit SAP18	61643100	60930200	60722200	58104600	60301300	58350700	62691300	60730300	58990100	59790300	62908600	60835600
O00423	EMAL1_HUMAN	EML1	Echinoderm microtubule-associated protein-like 1	11429800	11469600	11825900	12173400	11114200	12288000	11838400	12031000	11620300	12026500	11334900	11671400
O00425	IF2B3_HUMAN	IGF2BP3	Insulin-like growth factor 2 mRNA-binding protein 3	66441600	69844200	69482300	71851400	69365700	70247100	67211500	69455500	66707100	70301500	65868900	67952500
O00429	DNM1L_HUMAN	DNM1L	Dynamin-1-like protein	83147400	84296500	88491900	89651600	85656000	87953700	81509400	82064600	82160300	80517800	82117000	81804500
O00442	RTCA_HUMAN	RTCA	RNA 3'-terminal phosphate cyclase	22739800	25542700	24615200	22783600	25979300	24814200	23799000	26577800	20916900	27159600	22132500	23883700
O00443	P3C2A_HUMAN	PIK3C2A	Phosphatidylinositol 4-phosphate 3-kinase C2 domain-containing subunit alpha	5710870	6105340	5868430	6219680	5975460	6132780	5723060	6398640	5868430	5839690	5574420	6184610
O00458	IFRD1_HUMAN	IFRD1	Interferon-related developmental regulator 1	455004	500522	405246	527209	525063	533966	488953	462861	434507	484177	537161	666226
O00459	P85B_HUMAN	PIK3R2	Phosphatidylinositol 3-kinase regulatory subunit beta	41204600	39887600	41530900	42208900	39999200	43417800	41496700	41798800	39181200	39699000	38876200	40912300
O00461	GOLI4_HUMAN	GOLIM4	Golgi integral membrane protein 4	18547200	16523900	18644500	17610900	19016900	18276300	18418300	18483600	18384800	18616400	17358800	17863400
O00462	MANBA_HUMAN	MANBA	Beta-mannosidase	7049920	7005480	7307920	8076570	7334210	8048940	7102570	7036990	6212360	7699480	6727390	7238460
O00463	TRAF5_HUMAN	TRAF5	TNF receptor-associated factor 5	1402390	1506690	1522360	1688940	1398240	2003090	1637760	1562860	1680010	1435560	1478520	1736850
O00468	AGRIN_HUMAN	AGRN	Agrin	85293600	117347000	81779200	123217000	73012500	108057000	83459000	116064000	82458200	123537000	84028200	113625000
O00469	PLOD2_HUMAN	PLOD2	Procollagen-lysine,2-oxoglutarate 5-dioxygenase 2	263490000	317922000	283836000	366997000	286665000	351956000	258614000	310666000	264989000	325582000	259545000	315832000
O00470	MEIS1_HUMAN	MEIS1	Homeobox protein Meis1	2693200	2456070	1240310	2997400	4657940	1788320	2591830	2407750	1157300	1056640	4357870	1563480
O00471	EXOC5_HUMAN	EXOC5	Exocyst complex component 5	15291100	16113500	14916500	15278800	14402600	15101700	15025300	14995800	14613500	14722000	14863900	15168000
O00478	BT3A3_HUMAN	BTN3A3	Butyrophilin subfamily 3 member A3	9247230	11636900	10992400	9322850	9860260	9420070	11549000	12275600	10545700	10810000	12140200	11821700
O00479	HMGN4_HUMAN	HMGN4	High mobility group nucleosome-binding domain-containing protein 4	27399800	33465800	38461500	44158700	41039400	44036700	25812400	33067500	39207300	31249400	26710900	40411900
O00483	NDUA4_HUMAN	NDUFA4	Cytochrome c oxidase subunit NDUFA4	118272000	110835000	113679000	100980000	114824000	102334000	119378000	100654000	118470000	105518000	115716000	109239000
O00487	PSDE_HUMAN	PSMD14	26S proteasome non-ATPase regulatory subunit 14	121983000	121858000	133051000	122629000	129253000	130552000	127897000	119694000	117293000	125231000	134081000	123990000
O00488	ZN593_HUMAN	ZNF593	Zinc finger protein 593	5542080	4608790	5595690	5784500	5744680	5616560	5112460	5126570	5498030	4661690	4565980	4811020
O00499	BIN1_HUMAN	BIN1	Myc box-dependent-interacting protein 1	99880800	101581000	110018000	106351000	109373000	109984000	99934700	101086000	102623000	101395000	100620000	104181000
O00505	IMA4_HUMAN	KPNA3	Importin subunit alpha-4	85300000	78408900	93871400	87116800	92521700	89734400	88576000	86790200	91369300	85643700	78783200	82720000
O00506	STK25_HUMAN	STK25	Serine/threonine-protein kinase 25	14114100	17044600	14043300	15791100	15487800	15387600	15029900	14698100	16109800	15179000	14266400	16156100
O00512	BCL9_HUMAN	BCL9	B-cell CLL/lymphoma 9 protein	26783100	61595100		26002200	23701800	21338000			21381200
O00522	KRIT1_HUMAN	KRIT1	Krev interaction trapped protein 1	1314430	1316890	1913760	1563770	1893560	1815120	1488630	1196890	1480930	1304630	1370780	1407900
O00541	PESC_HUMAN	PES1	Pescadillo homolog	60609700	55826800	66353100	60604700	68085700	61599300	59813600	54723900	60488300	54326200	62153300	56968700
O00559	RCAS1_HUMAN	EBAG9	Receptor-binding cancer antigen expressed on SiSo cells		1997070	1772450	2028570	2040020			1889960		2032420	1721690	1721260
O00560	SDCB1_HUMAN	SDCBP	Syntenin-1	36094300	31518700	37141800	30518300	35977400	30423000	38737800	30383700	37375000	28959000	37467200	29399700
O00562	PITM1_HUMAN	PITPNM1	Membrane-associated phosphatidylinositol transfer protein 1	13617200	14720100	13380200	15069500	14054300	14733200	12693000	14741200	12688700	14161300	14238400	13575900
O00566	MPP10_HUMAN	MPHOSPH10	U3 small nucleolar ribonucleoprotein protein MPP10	20500400	20396400	22419000	19246400	23232000	22937500	22146400	18638600	25026200	21432200	21108700	19568000
O00567	NOP56_HUMAN	NOP56	Nucleolar protein 56	68353100	64960400	70640200	73161600	73642500	76590400	67617900	59850700	71593300	123754000	65196400	63523500
O00570	SOX1_HUMAN	SOX1	Transcription factor SOX-1										353586
O00571	DDX3X_HUMAN	DDX3X	ATP-dependent RNA helicase DDX3X	169631000	163186000	181944000	168995000	178819000	168466000	170334000	162999000	169080000	152974000	167759000	162335000
O00584	RNT2_HUMAN	RNASET2	Ribonuclease T2	3154310	3708130	3054350	3986230	2914280	3649880	3419350	3846720	3194090	4257040	2848260	3623590
O00585	CCL21_HUMAN	CCL21	C-C motif chemokine 21										128725
O00590	ACKR2_HUMAN	ACKR2	Atypical chemokine receptor 2					84493.4
O00592	PODXL_HUMAN	PODXL	Podocalyxin	11870100	13652000	12751100	13216400	13358300	14585200	11887500	13925200	12465400	13324700	11628300	14205000
O00602	FCN1_HUMAN	FCN1	Ficolin-1	12384900					19217400			11835300			23633700
O00622	CCN1_HUMAN	CCN1	CCN family member 1	75446800	114637000	76048300	104898000	98360000	111378000	72848300	94021800	64292500	84204800	65047400	78237300
O00623	PEX12_HUMAN	PEX12	Peroxisome assembly protein 12	2855090						2581840	2388130	2129070		2726420
O00624	NPT3_HUMAN	SLC17A2	Sodium-dependent phosphate transport protein 3										250972
O00625	PIR_HUMAN	PIR	Pirin	18459100	21541400	20586700	23603500	19926300	23336900	18163900	21521000	19140500	22153900	19308900	21125300
O00628	PEX7_HUMAN	PEX7	Peroxisomal targeting signal 2 receptor									175699
O00629	IMA3_HUMAN	KPNA4	Importin subunit alpha-3	59807700	64209800	72075700	60976100	66060700	63495300	69157000	65033200	63975900	64651600	59321800	61411100
O00634	NET3_HUMAN	NTN3	Netrin-3				293188		1402500
O00635	TRI38_HUMAN	TRIM38	E3 ubiquitin-protein ligase TRIM38	6411860	6387030	5959780	6919590	6437490	5508750	10071600	7527950	5689010	6900100	3732880	5247100
O00712	NFIB_HUMAN	NFIB	Nuclear factor 1 B-type	5642170	5745480	6130090	5816060	6610380	6037100	6098530	5684750	5533810	5589970	5665580	4683850
O00716	E2F3_HUMAN	E2F3	Transcription factor E2F3	1086430	1047090	1162580	717545	952997	992547	992999	938021	1042270	956007	1104270	895364
O00743	PPP6_HUMAN	PPP6C	Serine/threonine-protein phosphatase 6 catalytic subunit	43035800	39388100	42460500	42738800	41546000	44117500	41806700	35947200	42333000	37028200	38528100	39778400
O00744	WN10B_HUMAN	WNT10B	Protein Wnt-10b			2388250							3430590
O00746	NDKM_HUMAN	NME4	Nucleoside diphosphate kinase, mitochondrial	5597400	4631980	6903460	5491870	7345840	5396800	5327400	4476990	5442900	4074790	5266880	4167520
O00748	EST2_HUMAN	CES2	Cocaine esterase	1757360	1719380	1537800	1776330	1897860	1591500	1823380	1185190	1648880	1871820	1839120	1641710
O00754	MA2B1_HUMAN	MAN2B1	Lysosomal alpha-mannosidase	17131800	16079500	17297300	18249000	17228200	17320400	15844000	15979400	15816900	16572000	16410300	15113500
O00757	F16P2_HUMAN	FBP2	Fructose-1,6-bisphosphatase isozyme 2								113213
O00764	PDXK_HUMAN	PDXK	Pyridoxal kinase	41749600	40937000	45263500	44407100	44689700	41901100	37085800	40259200	38214500	39582300	40767000	37810200
O00767	SCD_HUMAN	SCD	Stearoyl-CoA desaturase	41067000	51202900	44664800	48512000	50034400	59737300	40053100	52418500	37931500	43573500	40690600	52305700
O14494	PLPP1_HUMAN	PLPP1	Phospholipid phosphatase 1	11776500	12720200	11795800	13727400	11611500	13284200	13271700	12820900	11960700	13744300	13229500	11682900
O14495	PLPP3_HUMAN	PLPP3	Phospholipid phosphatase 3	2706820	2980450	1964160	2389100	1973480	2467410	2425470	2469470	2453490	2154510	2163800	2667080
O14497	ARI1A_HUMAN	ARID1A	AT-rich interactive domain-containing protein 1A	12317200	10803500	12129300	10826000	12403600	10993900	11870300	11189800	11749300	10940500	11256100	10811700
O14508	SOCS2_HUMAN	SOCS2	Suppressor of cytokine signaling 2			57729.9
O14511	NRG2_HUMAN	NRG2	Pro-neuregulin-2, membrane-bound isoform				1328450								1476130
O14513	NCKP5_HUMAN	NCKAP5	Nck-associated protein 5	23442100
O14519	CDKA1_HUMAN	CDK2AP1	Cyclin-dependent kinase 2-associated protein 1	6656130	5209170	6363100	5895290	6765630	6066840	7445690	5380710	5848730	6290210	5593990	5908560
O14521	DHSD_HUMAN	SDHD	Succinate dehydrogenase [ubiquinone] cytochrome b small subunit, mitochondrial	29036100	26205000	29919900	27453300	32950900	26224200	27686000	23310600	27167600	23837500	26672700	25089900
O14523	C2C2L_HUMAN	C2CD2L	Phospholipid transfer protein C2CD2L	1448450	1374190	1641180	1140750	1432240	1047850	1452590	1312430	1612140	1457220	1194640	1328490
O14524	NEMP1_HUMAN	NEMP1	Nuclear envelope integral membrane protein 1	3339350	3215300	3305270	3052550	3501400	3022240	3559860	3477850	3453000	2848880	3016730	3205120
O14526	FCHO1_HUMAN	FCHO1	F-BAR domain only protein 1	1079500	2118000	1426060	1391270	1345030	7628700	1180220	1048190	1167330	1217740	1157910	1198150
O14530	TXND9_HUMAN	TXNDC9	Thioredoxin domain-containing protein 9	21027700	18259000	23007000	19756000	23136000	20916900	19647200	19555000	20009600	18393700	19674000	18008700
O14531	DPYL4_HUMAN	DPYSL4	Dihydropyrimidinase-related protein 4	14207700	14454700	15441200	15653800	14536500	13376000	15088200	12882800	13931200	14329400	13824600	13281400
O14543	SOCS3_HUMAN	SOCS3	Suppressor of cytokine signaling 3									382748		348886	430744
O14544	SOCS6_HUMAN	SOCS6	Suppressor of cytokine signaling 6	1485540							2121830	3493610
O14545	TRAD1_HUMAN	TRAFD1	TRAF-type zinc finger domain-containing protein 1	5368930	5525120	5342840	5719170	5678230	5450750	5449250	5606820	5570130	5550450	4883490	5058220
O14548	COX7R_HUMAN	COX7A2L	Cytochrome c oxidase subunit 7A-related protein, mitochondrial	22276600	21993400	23157000	22843900	24555300	23343500	22235400	21616900	21536900	23095500	21491000	22393100
O14558	HSPB6_HUMAN	HSPB6	Heat shock protein beta-6					156951
O14561	ACPM_HUMAN	NDUFAB1	Acyl carrier protein, mitochondrial	6846550	6163930	5904290	5808300	4791700	3899990	6981260	4958380	5008820	4497510	6546920	6051430
O14562	UBFD1_HUMAN	UBFD1	Ubiquitin domain-containing protein UBFD1	33509500	36574000	33213600	37361000	34045300	38101300	34362000	38144000	33868800	37870500	34047200	36825800
O14569	C56D2_HUMAN	CYB561D2	Transmembrane reductase CYB561D2	14399900	15158900	17100100	16385100	17338800	17310100	15268800	16026800	14557100	15116600	15605900	14981800
O14578	CTRO_HUMAN	CIT	Citron Rho-interacting kinase	11733500		13823600	4502670	16544900	5795380	12998300		14326600	3945580	10660200	7123030
O14579	COPE_HUMAN	COPE	Coatomer subunit epsilon	127146000	136417000	128170000	132571000	125743000	128290000	143767000	174396000	140965000	144937000	127006000	165032000
O14602	IF1AY_HUMAN	EIF1AY	Eukaryotic translation initiation factor 1A, Y-chromosomal										168887
O14603	PRY_HUMAN	PRYP4	PTPN13-like protein, Y-linked									514828
O14604	TYB4Y_HUMAN	TMSB4Y	Thymosin beta-4, Y-chromosomal							3396810
O14613	BORG1_HUMAN	CDC42EP2	Cdc42 effector protein 2	2265160	2129120	1977060	2452000	1997720		2471180	1945010	2043650	1977560
O14617	AP3D1_HUMAN	AP3D1	AP-3 complex subunit delta-1	68233500	68444800	70828900	69575900	69780500	70976700	67414100	66985400	67248400	70573300	68152600	69471600
O14618	CCS_HUMAN	CCS	Copper chaperone for superoxide dismutase	14901000	18288500	16205000	19089500	14462300	18349100	15809200	16128900	15381900	17728700	15032600	17341400
O14627	CDX4_HUMAN	CDX4	Homeobox protein CDX-4							396049	407935	412004
O14633;Q5TA81;Q5TA82;Q5T7P3;Q5TA76;Q5TA78;Q5TA79;Q9BYE3	LCE1B_HUMAN;LCE2A_HUMAN;LCE2B_HUMAN;LCE2C_HUMAN;LCE2D_HUMAN;LCE3A_HUMAN;LCE3D_HUMAN;LCE4A_HUMAN	LCE1B;LCE2A;LCE2B;LCE2C;LCE2D;LCE3A;LCE3D;LCE4A	Late cornified envelope protein 2B				727537
O14639	ABLM1_HUMAN	ABLIM1	Actin-binding LIM protein 1	17125100	19487500	17435600	19730600	18377400	21138800	17262200	20043400	17554900	20780400	17300200	20308200
O14640	DVL1_HUMAN	DVL1	Segment polarity protein dishevelled homolog DVL-1	4206500	6325010	4883740	6386350	9875470	9060640	4426490	5204040	4794370	5583990	5842430	7333600
O14641	DVL2_HUMAN	DVL2	Segment polarity protein dishevelled homolog DVL-2	13842000	12963700	12791000	11977400	13367100	11584900	13502600	13475000	13685900	11399900	12695700	13156000
O14646	CHD1_HUMAN	CHD1	Chromodomain-helicase-DNA-binding protein 1	2064790	1771470	1781960	1496580	2021330	1718950	2137210	1667840	2043220	1813700	2063330	1745810
O14647	CHD2_HUMAN	CHD2	Chromodomain-helicase-DNA-binding protein 2	7745450	8353690	8067510	8523890	8287190	8214280	8247240	8042540	7961700	8242010	8106970	7904860
O14649	KCNK3_HUMAN	KCNK3	Potassium channel subfamily K member 3				4643580
O14653	GOSR2_HUMAN	GOSR2	Golgi SNAP receptor complex member 2	28114000	31716900	30431900	32123800	29068200	30487000	27828900	29137900	27165400	30452000	30667200	29274100
O14656	TOR1A_HUMAN	TOR1A	Torsin-1A	20005800	18712400	19192000	18775000	18842100	18638400	19384100	19337600	19633900	19406900	19341300	18244900
O14657	TOR1B_HUMAN	TOR1B	Torsin-1B	10542700	10052300	10691200	9914100	11099900	9834530	10665700	9912130	10543900	9735550	10370500	10418800
O14662	STX16_HUMAN	STX16	Syntaxin-16	12735500	13418600	13362200	13862900	13744900	14137300	12385800	13967300	12835000	13369200	12674700	12707300
O14668	TMG1_HUMAN	PRRG1	Transmembrane gamma-carboxyglutamic acid protein 1					39390
O14672	ADA10_HUMAN	ADAM10	Disintegrin and metalloproteinase domain-containing protein 10	33493600	34375500	34740300	35498300	35831800	35236300	32433000	33231100	35302400	32499900	33629700	33405800
O14678	ABCD4_HUMAN	ABCD4	Lysosomal cobalamin transporter ABCD4	444213	325614	427853	378713	436337	403701	431796	346409	423019	374227	439086	330256
O14681	EI24_HUMAN	EI24	Etoposide-induced protein 2.4 homolog	14595700	14257300	15773400	14195100	15956900	16324900	15849800	13323900	10777000	14643000	15014700	16069600
O14682	ENC1_HUMAN	ENC1	Ectoderm-neural cortex protein 1	4902180	3628380	4331800	3984510	4524550	4369250	3663340	4233780	2906220	3265490	2981420	2676650
O14683	P5I11_HUMAN	TP53I11	Tumor protein p53-inducible protein 11							970180
O14686	KMT2D_HUMAN	KMT2D	Histone-lysine N-methyltransferase 2D	12283500	8014250	13243900	12944300	14115600	10951400	11764300	10573300	9754770	10503600	7148910	9742840
O14709	ZN197_HUMAN	ZNF197	Zinc finger protein 197					1102400
O14727	APAF_HUMAN	APAF1	Apoptotic protease-activating factor 1	19312700	17855600	19414400	18516300	18825100	18014300	20027600	18351100	17643600	18533200	19190600	19834000
O14730	RIOK3_HUMAN	RIOK3	Serine/threonine-protein kinase RIO3	6751920	6836490	6733030	6632890	7063060	6813400	6942200	6472200	6452980	6939170	6998960	7400990
O14733	MP2K7_HUMAN	MAP2K7	Dual specificity mitogen-activated protein kinase kinase 7	1483170	1559970	1602220	1259710	1716550	1749720	1654800	1602430	1595300	1545870	1605480	1292360
O14734	ACOT8_HUMAN	ACOT8	Acyl-coenzyme A thioesterase 8	9752270	8672500	9892450	9792700	9402990	9884910	9417540	9366150	9656640	10316200	9032520	9482560
O14735	CDIPT_HUMAN	CDIPT	CDP-diacylglycerol--inositol 3-phosphatidyltransferase	29367000	30920500	32277400	37559700	37587600	42671800	31382700	29477100	38831200	36052100	29050400	32554800
O14737	PDCD5_HUMAN	PDCD5	Programmed cell death protein 5	54606000	52700000	52660000	48192700	53629500	44997200	58475900	54224400	53147200	49469900	56678200	49642000
O14744	ANM5_HUMAN	PRMT5	Protein arginine N-methyltransferase 5	43943300	42777600	42748400	41505600	42927400	41438000	42409000	42728400	43741000	41647700	43418300	42356900
O14745	NHRF1_HUMAN	NHERF1	Na(+)/H(+) exchange regulatory cofactor NHE-RF1	77212000	88074900	79228400	92337100	80977200	87833200	76131300	88172400	75005100	83584100	74310700	88220700
O14757	CHK1_HUMAN	CHEK1	Serine/threonine-protein kinase Chk1	2024340	1139060	2175450	1188960	2476440	1462990	1834040	1138800	2085640	1134200	1995750	1197930
O14763	TR10B_HUMAN	TNFRSF10B	Tumor necrosis factor receptor superfamily member 10B	14552700	13605500	14673000	15236800	15260700	15246800	14758600	14504200	14576800	14235000	13683700	14393300
O14764	GBRD_HUMAN	GABRD	Gamma-aminobutyric acid receptor subunit delta												2469240
O14772	FPGT_HUMAN	FPGT	Fucose-1-phosphate guanylyltransferase	1154740	1327570	1297330	1320600	1178390	1317730	1207510	1196680	1118980	1037050	1383070	1099630
O14773	TPP1_HUMAN	TPP1	Tripeptidyl-peptidase 1	60492200	59350500	66251600	71272900	65403500	67726800	61177300	65238300	63050300	69980200	63790300	62794800
O14775	GNB5_HUMAN	GNB5	Guanine nucleotide-binding protein subunit beta-5	1626560	1519530	1688390	1596500	1709990		1915160	1451010	1399150		1528710	1328730
O14776	TCRG1_HUMAN	TCERG1	Transcription elongation regulator 1	37201500	37831300	38177400	38368000	37617800	37188700	38737500	37345900	37126700	37296700	36607500	37597000
O14777	NDC80_HUMAN	NDC80	Kinetochore protein NDC80 homolog	35903300	32667900	40206800	40265600	13944100	46267400	42672100	44441500	38141500	48774900	32808600	39883500
O14786	NRP1_HUMAN	NRP1	Neuropilin-1	76106200	60170100	75202200	65996700	71251500	67281400	73988600	65461800	76439600	64978700	71515800	63920200
O14787	TNPO2_HUMAN	TNPO2	Transportin-2	38264100	40179500	41324900	42129500	41779400	42390300	39656600	37833300	38771300	38692900	38125400	39354300
O14791	APOL1_HUMAN	APOL1	Apolipoprotein L1					1116720
O14795	UN13B_HUMAN	UNC13B	Protein unc-13 homolog B	3417070	3529120	3411170	2955190	3350820	3634390	3112880	3494870	3067960	3323400	2738120	3316300
O14802	RPC1_HUMAN	POLR3A	DNA-directed RNA polymerase III subunit RPC1	4902640	4105790	4307600	4058800	4140450	3972380	4629990	4434270	4626430	4262350	4625560	4324350
O14807	RASM_HUMAN	MRAS	Ras-related protein M-Ras	329443	16113500	5620070		604649	392898	6509960		171591	251348	359526
O14817	TSN4_HUMAN	TSPAN4	Tetraspanin-4	29367600	35134900	29266000	32776000	29839800	32532900	28727000	32724400	30513800	33841800	30207300	34245400
O14818	PSA7_HUMAN	PSMA7	Proteasome subunit alpha type-7	217673000	235473000	256174000	254775000	265652000	246828000	211611000	213368000	220570000	214048000	237465000	215539000
O14828	SCAM3_HUMAN	SCAMP3	Secretory carrier-associated membrane protein 3	35037100	39267500	40514500	42584700	39964200	39894100	36283800	35585000	34860800	35962600	35339500	33843800
O14829	PPE1_HUMAN	PPEF1	Serine/threonine-protein phosphatase with EF-hands 1	202207	1029010			205460	512194	329988	550238	372028	795541	1170780	1027130
O14832	PAHX_HUMAN	PHYH	Phytanoyl-CoA dioxygenase, peroxisomal	613925	550376				604080			620389	815845
O14867	BACH1_HUMAN	BACH1	Transcription regulator protein BACH1	2343710	2376330	2468480	2356570	2429440	2574270	2462570	2354520	2394880	2431630	2252680	2340990
O14874	BCKD_HUMAN	BCKDK	Branched-chain alpha-ketoacid dehydrogenase kinase	9283520	9244840	10215600	9615530	10387800	10628100	9300240	9257290	9096950	8570640	9947140	8991610
O14879	IFIT3_HUMAN	IFIT3	Interferon-induced protein with tetratricopeptide repeats 3	9756710	8356020	9031330	8306100	8805310	7498650	9405180	8595520	9291500	8171090	9748060	8258250
O14880	MGST3_HUMAN	MGST3	Glutathione S-transferase 3, mitochondrial	55028200	55678400	60122100	55285100	52806200	48126800	54333400	51311700	56889700	50089100	56450500	52963000
O14893	GEMI2_HUMAN	GEMIN2	Gem-associated protein 2	6981560	7007770	7723140	8095560	7425560	7305820	7308270	7349570	6422730	6308430	6935330	6585190
O14894	T4S5_HUMAN	TM4SF5	Transmembrane 4 L6 family member 5							961223	402719
O14907	TX1B3_HUMAN	TAX1BP3	Tax1-binding protein 3	90701400	99160000	86955900	86694900	80992900	82720300	87219600	82983200	90114800	85346600	88739800	83796500
O14908	GIPC1_HUMAN	GIPC1	PDZ domain-containing protein GIPC1	33470200	32794800	34396800	34439700	38017200	35548800	34863600	34110600	33632800	34621000	30989700	33245000
O14920	IKKB_HUMAN	IKBKB	Inhibitor of nuclear factor kappa-B kinase subunit beta	11352000	11131600	11160700	11002600	10668300	11216700	10989400	11036700	11251300	10849000	10982100	11281500
O14921	RGS13_HUMAN	RGS13	Regulator of G-protein signaling 13			109086
O14924	RGS12_HUMAN	RGS12	Regulator of G-protein signaling 12	6193090		3773350		3671760		5411450	5397220	4807610
O14925	TIM23_HUMAN	TIMM23	Mitochondrial import inner membrane translocase subunit Tim23	8599940	8117330	7577960	8108330	8796360	7524760	8720140	7494860	9449400	7883120	8475470	7506480
O14929	HAT1_HUMAN	HAT1	Histone acetyltransferase type B catalytic subunit	47494700	42970700	49858200	40154900	47857500	41300200	48665900	40602700	49842800	37839600	51164900	37939700
O14931	NCTR3_HUMAN	NCR3	Natural cytotoxicity triggering receptor 3					3134650	3607710
O14933	UB2L6_HUMAN	UBE2L6	Ubiquitin/ISG15-conjugating enzyme E2 L6	8421170	8645980	8217820	9487510	9740900	8892910	9068560	8978680	9430580	8863680	9516990	8958600
O14936	CSKP_HUMAN	CASK	Peripheral plasma membrane protein CASK	11871700	11615400	11209900	11401000	11247600	11931000	11224700	11682000	11926400	11231500	11700600	11683400
O14939	PLD2_HUMAN	PLD2	Phospholipase D2	854925	925359	1005820	1122260	987820	980047	806367	820039	878494	921230	825819	936452
O14948	TFEC_HUMAN	TFEC	Transcription factor EC			104590
O14949	QCR8_HUMAN	UQCRQ	Cytochrome b-c1 complex subunit 8	33540600	31967000	32211700	36213900	32748100	32689800	32632000	32397900	32761900	33467900	33180500	32956000
O14950;P19105	ML12A_HUMAN;ML12B_HUMAN	MYL12A;MYL12B	Myosin regulatory light chain 12B	606853000	834989000	694359000	736018000	654651000	812933000	656262000	820558000	760887000	776612000	907673000	711218000
O14958	CASQ2_HUMAN	CASQ2	Calsequestrin-2				160464
O14960	LECT2_HUMAN	LECT2	Leukocyte cell-derived chemotaxin-2											4735360
O14964	HGS_HUMAN	HGS	Hepatocyte growth factor-regulated tyrosine kinase substrate	51521000	52673100	54293700	52624200	54239500	52599000	52495100	53984600	53704400	52661400	53191700	52028100
O14967	CLGN_HUMAN	CLGN	Calmegin	16571600	14594000	16256100	14566500	16597800	14567600	16607900	14999800	16711100	14954300	17216100	15084200
O14972	VP26C_HUMAN	VPS26C	Vacuolar protein sorting-associated protein 26C	17454200	17191100	15974700	16709400	17730500	16503200	18163500	16190800	17638900	17883400	17706600	17805800
O14974	MYPT1_HUMAN	PPP1R12A	Protein phosphatase 1 regulatory subunit 12A	57244600	63322400	57835900	59403700	56272200	59138100	56655500	56810700	56642200	59722000	58381300	58306900
O14976	GAK_HUMAN	GAK	Cyclin-G-associated kinase	25509900	25734500	24833500	24572100	24923000	23890300	24804400	24145900	24911800	25252400	24308300	24795000
O14977	AZIN1_HUMAN	AZIN1	Antizyme inhibitor 1			658696		754150				2170280	3478030
O14979	HNRDL_HUMAN	HNRNPDL	Heterogeneous nuclear ribonucleoprotein D-like	324701000	337909000	387305000	347042000	347982000	342183000	313946000	312940000	357843000	314908000	364426000	290399000
O14980	XPO1_HUMAN	XPO1	Exportin-1	175155000	169850000	184984000	185836000	184715000	184344000	172684000	170178000	172730000	163279000	168923000	169099000
O14981	BTAF1_HUMAN	BTAF1	TATA-binding protein-associated factor 172	14738700	14049000	15338600	15139000	15307200	14481900	14430800	14235300	14601400	14033700	14684300	14134700
O15013	ARHGA_HUMAN	ARHGEF10	Rho guanine nucleotide exchange factor 10	11378500	12132400	12323100	12613500	12568900	12865600	11548900	12632100	11973200	11441700	11493700	12025200
O15014	ZN609_HUMAN	ZNF609	Zinc finger protein 609	2028580	1995970	2692630	2567150	2546630	2209680	2163760	1752590	2449900	2106500	2098830	2058180
O15020	SPTN2_HUMAN	SPTBN2	Spectrin beta chain, non-erythrocytic 2	30497700	32224100	30634400	33285200	29703800	33181300	28840200	30993900	30497800	31789900	29301500	32125500
O15021	MAST4_HUMAN	MAST4	Microtubule-associated serine/threonine-protein kinase 4	16087900	15426400	14801700	15766400	14891700	15104600	16246500	15722500	16094800	16903300	15561100	15327000
O15027	SC16A_HUMAN	SEC16A	Protein transport protein Sec16A	39462700	41596800	40372700	42896600	40445300	42871000	39486000	41605600	38812800	42856700	39371300	41486500
O15031	PLXB2_HUMAN	PLXNB2	Plexin-B2	43708200	43949900	44686900	45847000	45094300	46397400	42697400	44931900	42907100	45387600	43413800	44392400
O15033	AREL1_HUMAN	AREL1	Apoptosis-resistant E3 ubiquitin protein ligase 1	4086610	7192530	6692220	10852900	9296110	10147100	5362170	5008200	644586	4370730	4391060	10289300
O15037	KHNYN_HUMAN	KHNYN	Protein KHNYN	4532960	4397160	4925010	4505820	4471200	5027240	4468340	4157730	4499020	4468420	4058330	3808430
O15040	TCPR2_HUMAN	TECPR2	Tectonin beta-propeller repeat-containing protein 2	4984920	5677590	5866300	5858290	6589380	5016280	4385650	5355460	5117980	4883290	4605070	4918390
O15042	SR140_HUMAN	U2SURP	U2 snRNP-associated SURP motif-containing protein	37118200	36655500	38909400	35439400	39085100	37019600	39328000	37319000	39217700	35767400	35532600	35316400
O15047	SET1A_HUMAN	SETD1A	Histone-lysine N-methyltransferase SETD1A	6902040	6944600	7785510	7873170	7891070	7798690	7219930	7308330	6169950	6957290	6812450	6733910
O15050	TRNK1_HUMAN	TRANK1	TPR and ankyrin repeat-containing protein 1	22526100	7925810	31717100	24130000	80437100	49386500	9255300	13595600	23918000	6910670	25620600	9235510
O15056	SYNJ2_HUMAN	SYNJ2	Synaptojanin-2	73301800	76382200	70427600	75341200	71669100	74244400	73118300	76309000	71267100	77218300	73839100	75681100
O15061	SYNEM_HUMAN	SYNM	Synemin	12383400	13154100	12461600	14279400	12090600	13538800	13057000	13764000	12959800	13528200	12156600	13294000
O15063	GRRE1_HUMAN	GARRE1	Granule associated Rac and RHOG effector protein 1	1252970	1350730	1441690	1652970	1402420	1681680	1281230	1407730	1431940	1405980	1166090	1323090
O15066	KIF3B_HUMAN	KIF3B	Kinesin-like protein KIF3B	4149230	4071350	4392740	4516660	4382140	4658880	4403340	4440230	4214710	4756260	4350250	4776300
O15067	PUR4_HUMAN	PFAS	Phosphoribosylformylglycinamidine synthase	60905800	60284400	65542500	66281100	65490500	64840200	61099300	61012600	60425900	59552800	61222000	59580400
O15069	NACAD_HUMAN	NACAD	NAC-alpha domain-containing protein 1		872640	878668	907830	984903		653341		581906			865540
O15083	ERC2_HUMAN	ERC2	ERC protein 2	4826860	5420820		6127830		6005140		5773430
O15084	ANR28_HUMAN	ANKRD28	Serine/threonine-protein phosphatase 6 regulatory ankyrin repeat subunit A	8905090	8995390	9411350	9180280	9472540	9446800	9060800	9097560	9199480	9552370	8736980	8909820
O15085	ARHGB_HUMAN	ARHGEF11	Rho guanine nucleotide exchange factor 11	1955630	1854520	2032690	2029010	2049760	2008380	1893980	1849400	1871260	2000710	1498860	1942890
O15091	MRPP3_HUMAN	PRORP	Mitochondrial ribonuclease P catalytic subunit	8687870	7391550	8980220	7601640	9203180	7732320	8421440	7455870	8593780	7048290	8343300	7386960
O15111	IKKA_HUMAN	CHUK	Inhibitor of nuclear factor kappa-B kinase subunit alpha	7592290	7253290	7749220	7569720	8360570	8343320	7061740	6798230	7809620	7274780	7857120	7139220
O15116	LSM1_HUMAN	LSM1	U6 snRNA-associated Sm-like protein LSm1	22227600	23773600	26841300	27085200	29851800	25460300	24533400	21306600	26600400	23764200	27943400	20040200
O15118	NPC1_HUMAN	NPC1	NPC intracellular cholesterol transporter 1	23851400	23976900	23369800	22330600	22836500	21804400	23123700	22532100	23125600	22868100	24684800	22263500
O15120	PLCB_HUMAN	AGPAT2	1-acyl-sn-glycerol-3-phosphate acyltransferase beta	95352600	115843000	103450000	98153300	93076800	101661000	101493000	95668100	110885000	93350400	104303000	94907800
O15121	DEGS1_HUMAN	DEGS1	Sphingolipid delta(4)-desaturase DES1	41123300	43826800	49218000	52720200	53667800	54402500	40093100	43889700	40855900	42088000	40435600	43498400
O15126	SCAM1_HUMAN	SCAMP1	Secretory carrier-associated membrane protein 1	35529200	39208900	40033500	42476200	39213300	42819300	36310500	37083200	37362100	40767900	37076900	38684700
O15127	SCAM2_HUMAN	SCAMP2	Secretory carrier-associated membrane protein 2	36635600	37169400	40328900	47296300	41824400	42567700	34031100	28678800	36032700	38676000	35772500	36864000
O15143	ARC1B_HUMAN	ARPC1B	Actin-related protein 2/3 complex subunit 1B	239911000	265278000	294266000	314475000	280201000	302869000	232255000	242339000	234034000	245353000	243692000	238469000
O15144	ARPC2_HUMAN	ARPC2	Actin-related protein 2/3 complex subunit 2	293539000	298376000	320066000	317836000	312466000	321281000	294717000	308717000	285868000	288946000	273907000	289329000
O15145	ARPC3_HUMAN	ARPC3	Actin-related protein 2/3 complex subunit 3	225100000	235760000	279270000	276652000	263000000	264534000	228260000	225678000	230019000	238124000	237333000	240148000
O15155	BET1_HUMAN	BET1	BET1 homolog	22560900	23529200	22195500	22073200	22346100	21913900	21437900	22573100	20022100	21791200	19733900	20989700
O15156	ZBT7B_HUMAN	ZBTB7B	Zinc finger and BTB domain-containing protein 7B	859817	565826		606630	585033	619432	832733	549220	694861	601549	936751	674783
O15160	RPAC1_HUMAN	POLR1C	DNA-directed RNA polymerases I and III subunit RPAC1	244909000	230915000	275548000	246124000	262547000	257736000	246562000	232502000	245233000	228244000	246224000	239650000
O15162	PLS1_HUMAN	PLSCR1	Phospholipid scramblase 1	14368100	13387200	14768100	13953000	14240300	14535600	13537300	13614400	14334800	13353500	13325200	13985400
O15164	TIF1A_HUMAN	TRIM24	Transcription intermediary factor 1-alpha	2582380	2047100	2734610	2044470	2650160	2160660	2188460	1967190	2357430	2087070	2414580	2079320
O15169	AXIN1_HUMAN	AXIN1	Axin-1	6222410		4226110		6318620	4134090	4840900			4479870
O15173	PGRC2_HUMAN	PGRMC2	Membrane-associated progesterone receptor component 2	98646100	112768000	96141800	111165000	93506200	103198000	92217300	101285000	92171900	108909000	94377300	105361000
O15197	EPHB6_HUMAN	EPHB6	Ephrin type-B receptor 6	2936500	2528460	2529360	1722470	1978480	1697320	2500490	2349560	2305240
O15198	SMAD9_HUMAN	SMAD9	Mothers against decapentaplegic homolog 9			502754			455144			1403690
O15204	ADEC1_HUMAN	ADAMDEC1	ADAM DEC1	682375	734995						740400	546191
O15211	RGL2_HUMAN	RGL2	Ral guanine nucleotide dissociation stimulator-like 2	5244850	5598950	5438270	5507460	4570760	5608320	4812180	5854910	5076310	5670170	4898170	5411240
O15212	PFD6_HUMAN	PFDN6	Prefoldin subunit 6	19139400	20614900	10707900	17273100	16116800	20894000	16134900	17262700	21837000	18749100	22928300	24980700
O15213	WDR46_HUMAN	WDR46	WD repeat-containing protein 46	14535000	13643100	14108500	13621900	15286200	13587800	14474200	13871400	13851700	13911800	13642100	13674700
O15226	NKRF_HUMAN	NKRF	NF-kappa-B-repressing factor	14787900	13868100	14818000	13936300	15185700	14123000	14580400	12824800	14161500	13467800	13712800	13414100
O15228	GNPAT_HUMAN	GNPAT	Dihydroxyacetone phosphate acyltransferase	12208000	35846800	12284600	11159000	11639900	11040300	55548700	12103400	37067300	12322400	12996100	12719500
O15230	LAMA5_HUMAN	LAMA5	Laminin subunit alpha-5	36964400	58647400	36808700	62910900	35226000	58989300	35300700	58489400	35432900	64244700	36252800	55303800
O15231	ZN185_HUMAN	ZNF185	Zinc finger protein 185	8016800	10049100	8603470	10565100	8339410	10533500	7486590	10564100	7796660	9895700	7604140	10149800
O15234	CASC3_HUMAN	CASC3	Protein CASC3	2510290	2066360	2679760	2221580	2584250	2300640	2378480	2159160	2555010	2284140	2460030	2318050
O15235	RT12_HUMAN	MRPS12	Small ribosomal subunit protein uS12m	15306100	15008600	16180400	15139700	17256300	15254200	15471500	13373400	13557600	14267100	16110900	12972100
O15239	NDUA1_HUMAN	NDUFA1	NADH dehydrogenase [ubiquinone] 1 alpha subcomplex subunit 1	9375490	6210860	8264340	8386840	9177910	7077910	10358000	8204970	6913170	7666500	5595650	5831170
O15243	OBRG_HUMAN	LEPROT	Leptin receptor gene-related protein	19716900	18990800	17494500	19138000	18379400	19359200	16656000	19621400	20981700	17603400	16972600	21198500
O15254	ACOX3_HUMAN	ACOX3	Peroxisomal acyl-coenzyme A oxidase 3	14154800	14027000	13866500	15094500	13200700	14521100	14145900	14661100	13589100	14672500	14193400	14081400
O15258	RER1_HUMAN	RER1	Protein RER1	64206600	74184100	68722300	69925100	67638600	69964400	60982500	68358200	62760500	65122300	63552100	66941300
O15260	SURF4_HUMAN	SURF4	Surfeit locus protein 4	154974000	158342000	163574000	170504000	156827000	158151000	134174000	153760000	145975000	150059000	137252000	151336000
O15269	SPTC1_HUMAN	SPTLC1	Serine palmitoyltransferase 1	30334500	28411500	28307800	28043700	29664500	28260500	29154000	26833100	29483500	27694100	30174500	28446100
O15270	SPTC2_HUMAN	SPTLC2	Serine palmitoyltransferase 2	14175400	45983900	14475000	44833800	54423400	50541200	51681800	41000900	14673200	48006500	45876600	15037000
O15273	TELT_HUMAN	TCAP	Telethonin										1808950
O15294	OGT1_HUMAN	OGT	UDP-N-acetylglucosamine--peptide N-acetylglucosaminyltransferase 110 kDa subunit	98805300	97766000	100333000	96179600	100894000	97961700	96876200	94425400	97606400	93783100	99203200	94115100
O15305	PMM2_HUMAN	PMM2	Phosphomannomutase 2	42798400	47868000	41294500	45189100	40906900	43839600	41501100	49301300	41102600	44165700	42421700	46537200
O15321	TM9S1_HUMAN	TM9SF1	Transmembrane 9 superfamily member 1	16830600	17255000	16890800	19020500	17413800	17472500	17718800	17197000	15918600	17520900	16801000	17345200
O15327	INP4B_HUMAN	INPP4B	Inositol polyphosphate 4-phosphatase type II	5645070	5527540	5157030	5504130	5082520	5278490	5560780	5487290	5623720	5773040	5018110	5790690
O15344	TRI18_HUMAN	MID1	E3 ubiquitin-protein ligase Midline-1	10259500	11431800	13038300	13862200	11556100	14211800	12206000	13667700	12576300	13520100	13852000	13309800
O15347	HMGB3_HUMAN	HMGB3	High mobility group protein B3	83436900	91307900	76857800	69098900	73803100	69075100	84269100	73738200	75258900	70517400	99101100	74041000
O15355	PPM1G_HUMAN	PPM1G	Protein phosphatase 1G	49234700	48190300	48877200	45223400	47828100	46808700	46353600	45112100	48298800	43281200	49468900	47213200
O15357	SHIP2_HUMAN	INPPL1	Phosphatidylinositol 3,4,5-trisphosphate 5-phosphatase 2	11526400	12041500	11393000	12251300	11657700	11879200	11405800	11797900	11896100	12209000	11490200	11766000
O15371	EIF3D_HUMAN	EIF3D	Eukaryotic translation initiation factor 3 subunit D	131660000	133442000	138787000	134008000	139353000	138142000	130241000	135673000	127718000	125989000	127559000	131056000
O15372	EIF3H_HUMAN	EIF3H	Eukaryotic translation initiation factor 3 subunit H	145103000	149874000	155896000	163155000	150453000	156757000	131812000	142741000	149557000	154077000	147603000	155948000
O15374	MOT5_HUMAN	SLC16A4	Monocarboxylate transporter 5	857995	1357930	827277	1182040	823935	1115920	881362	910180	1086550	1024600	938984	1277560
O15375	MOT6_HUMAN	SLC16A5	Monocarboxylate transporter 6					3218780
O15379	HDAC3_HUMAN	HDAC3	Histone deacetylase 3	24333500	23170800	24109600	22700000	23523400	22974700	23425200	22015000	23980100	24048200	23455800	21245900
O15381	NVL_HUMAN	NVL	Nuclear valosin-containing protein-like	4913790	4962390	5934090	5080170	6025720	5394060	4659980	4762000	4807570	5022320	4961200	4963490
O15382	BCAT2_HUMAN	BCAT2	Branched-chain-amino-acid aminotransferase, mitochondrial	16760500	15720100	16777600	17524900	17668600	17925000	16848800	17100300	17551100	17045600	17003400	16750800
O15391	TYY2_HUMAN	YY2	Transcription factor YY2	2153370	2177660	2152360	2177420	1954980	2208490	1874160	2109940	2121170	1966600	2223720	2046710
O15397	IPO8_HUMAN	IPO8	Importin-8	18588700	16327500	20949600	17634500	21434300	18291600	19415100	16894500	19459300	16136300	19240100	16463700
O15400	STX7_HUMAN	STX7	Syntaxin-7	33079900	33985200	35598600	35135000	36753000	35517000	35215200	34791100	34557800	34049700	32366300	32475700
O15417	TNC18_HUMAN	TNRC18	Trinucleotide repeat-containing gene 18 protein		193362	289083	322449	392780	268318	349562	256989	397076	359856	382951	335588
O15427	MOT4_HUMAN	SLC16A3	Monocarboxylate transporter 4	197192000	225044000	222364000	264551000	222528000	261922000	197513000	235780000	197179000	235275000	195787000	233921000
O15431	COPT1_HUMAN	SLC31A1	High affinity copper uptake protein 1	6246920	7312680	9208350	9128270	7536630	7166750	6173200	5864200	7026720	6049720	6730470	6511550
O15438	MRP3_HUMAN	ABCC3	ATP-binding cassette sub-family C member 3	69964.9	104091		142224	95688.4	142753		134600		137542		147007
O15439	MRP4_HUMAN	ABCC4	ATP-binding cassette sub-family C member 4	6569480	6284380	6718910	6443240	6380120	6008950	6407560	6159630	6470090	6199090	6544890	6107020
O15446	RPA34_HUMAN	POLR1G	DNA-directed RNA polymerase I subunit RPA34	10643300	8420440	11496300	9311660	11940900	8906800	10588900	9923530	10535300	9087290	9891390	8413440
O15455	TLR3_HUMAN	TLR3	Toll-like receptor 3	4918300	2893480	131570	592045	711808	955829	306004		131667	876529	1777850	2305780
O15460	P4HA2_HUMAN	P4HA2	Prolyl 4-hydroxylase subunit alpha-2	89580000	105003000	92652400	108249000	92421100	108932000	88732100	100633000	84483100	103569000	89355800	100445000
O15467	CCL16_HUMAN	CCL16	C-C motif chemokine 16						510383
O15484	CAN5_HUMAN	CAPN5	Calpain-5	9780590	9533500	9813720	9918160	9186400	9207680	10220200	9904680	9580130	10341800	9318590	9852270
O15498	YKT6_HUMAN	YKT6	Synaptobrevin homolog YKT6	65735400	69086800	74834000	75284000	75489300	72734900	67878200	70928900	69470900	71202600	68510500	69832300
O15499	GSC2_HUMAN	GSC2	Homeobox protein goosecoid-2									7973150
O15503	INSI1_HUMAN	INSIG1	Insulin-induced gene 1 protein		380804		361030	325908				513752	434004	245071	414508
O15504	NUP42_HUMAN	NUP42	Nucleoporin NUP42	4105710	4085360	4075370	4449620	4254440	4058240	4444360	4087450	3840920	4376290	4731370	4370470
O15511	ARPC5_HUMAN	ARPC5	Actin-related protein 2/3 complex subunit 5	247496000	278342000	288074000	302117000	269443000	278002000	257992000	262295000	261987000	263037000	268592000	259272000
O15514	RPB4_HUMAN	POLR2D	DNA-directed RNA polymerase II subunit RPB4	500776	501784	924115	885905	1144030	673942	403806	793251	905527			571908
O15516	CLOCK_HUMAN	CLOCK	Circadian locomoter output cycles protein kaput	439076	3854820	128077	101002	102174	3664290	2439810		91553.7	54226.2	80681.5	686378
O15519	CFLAR_HUMAN	CFLAR	CASP8 and FADD-like apoptosis regulator	8238560	766429			560156	2813310		519527	772312	11485100	299193
O15520	FGF10_HUMAN	FGF10	Fibroblast growth factor 10	568171	1006890	1947750	944198			981131		552501		517862	580486
O15522	NKX28_HUMAN	NKX2-8	Homeobox protein Nkx-2.8												5293660
O15524	SOCS1_HUMAN	SOCS1	Suppressor of cytokine signaling 1												546268
O15525	MAFG_HUMAN	MAFG	Transcription factor MafG	8099140		7074430		8387200	8528830	6703950	7628610	7262010		7684060	7764250
O15530	PDPK1_HUMAN	PDPK1	3-phosphoinositide-dependent protein kinase 1	8060940	8109180	9307010	8497990	9261550	8956670	8895500	7989690	8550490	8089050	7955960	7865720
O15533	TPSN_HUMAN	TAPBP	Tapasin	16508900	13886600	16292500	15044800	16282400	14460300	14903300	14350900	14198800	14193400	15675100	13302300
O15541	R113A_HUMAN	RNF113A	E3 ubiquitin-protein ligase RNF113A	14986200	15337500	13425100	14768000	14385200	14704200	16188700	16221900	14388900	15853900	15854800	16986100
O15550	KDM6A_HUMAN	KDM6A	Lysine-specific demethylase 6A	1058430		1005030	1194690	1078460	988533	1074670	955387	1069530	900001	745826	1079430
O15554	KCNN4_HUMAN	KCNN4	Intermediate conductance calcium-activated potassium channel protein 4	6690840	6350290	7172380	7760110	7044110	7008490	6957840	6868690	6761990	6764100	6993540	6910350
O43143	DHX15_HUMAN	DHX15	ATP-dependent RNA helicase DHX15	89512500	84273600	92342400	88547000	90366100	85939500	90164500	84600200	87276900	84099000	87364800	84271400
O43148	MCES_HUMAN	RNMT	mRNA cap guanine-N7 methyltransferase	53011200	54345400	57342900	54620000	54251200	58456500	54956500	56511000	56326100	56297700	52061600	55277000
O43149	ZZEF1_HUMAN	ZZEF1	Zinc finger ZZ-type and EF-hand domain-containing protein 1	12440600	12371500	11977400	12432700	11888800	12349600	11290300	11809500	11712600	12681500	11186800	11483300
O43150	ASAP2_HUMAN	ASAP2	Arf-GAP with SH3 domain, ANK repeat and PH domain-containing protein 2	24455300	26854600	24321000	27673200	24481700	27196500	23930700	26090800	23987600	26046300	24289200	26371000
O43155	FLRT2_HUMAN	FLRT2	Leucine-rich repeat transmembrane protein FLRT2	98379.6	1889950	1474410	3166070	660789	2940850		77265200	1113890	2626970	1318760	1554850
O43156	TTI1_HUMAN	TTI1	TELO2-interacting protein 1 homolog	8113510	7423400	8217350	6753450	8641950	7768640	8596330	6696470	8464560	6663260	8353760	7255370
O43157	PLXB1_HUMAN	PLXNB1	Plexin-B1	1483450		2004700	2189230		1640360	1361890	2051540		1900030	1976450	2024850
O43159	RRP8_HUMAN	RRP8	Ribosomal RNA-processing protein 8	5193830	5644020	5586180	4958640	5127800	5417250	4868880	4910560	4902160	4811610	5143220	5187900
O43164	PJA2_HUMAN	PJA2	E3 ubiquitin-protein ligase Praja-2	10172000	9853470	10878500	8631480	10157600	9213780	11161800	9577000	9221660	9431850	8958490	7488970
O43166	SI1L1_HUMAN	SIPA1L1	Signal-induced proliferation-associated 1-like protein 1	2113200	2425550	2548270	2543640	2468780	2337960	2155160	2348100	2207130	2387790	2407760	2136160
O43169	CYB5B_HUMAN	CYB5B	Cytochrome b5 type B	79436900	70980400	74353800	68311700	73447000	68078900	73017000	70630600	74273500	65112300	74631300	67281700
O43172	PRP4_HUMAN	PRPF4	U4/U6 small nuclear ribonucleoprotein Prp4	23051100	22438700	24012800	21938100	24048400	22581500	23448400	22521800	22644500	21843500	23532500	21628800
O43175	SERA_HUMAN	PHGDH	D-3-phosphoglycerate dehydrogenase	151235000	139666000	149824000	139246000	150204000	136764000	145998000	136387000	150809000	131417000	152418000	135751000
O43181	NDUS4_HUMAN	NDUFS4	NADH dehydrogenase [ubiquinone] iron-sulfur protein 4, mitochondrial	52502300	48418000	51367900	48786100	50497500	49615000	47277800	46808400	49221000	50265000	54849200	49438400
O43184	ADA12_HUMAN	ADAM12	Disintegrin and metalloproteinase domain-containing protein 12	7925240		1177210	525929	699245	1244790	410006	386621	6200590	7136490	415190	435413
O43186	CRX_HUMAN	CRX	Cone-rod homeobox protein	208009	280920	143602								180627
O43187	IRAK2_HUMAN	IRAK2	Interleukin-1 receptor-associated kinase-like 2	827594		760510	888246	774022		671167	854864	1018440	1013520	779673
O43189	PHF1_HUMAN	PHF1	PHD finger protein 1	859570	794777	928323	871452	1067210	997761	884122	957132	1044420	925995	588103	718724
O43194	GPR39_HUMAN	GPR39	G-protein coupled receptor 39	2622790	2745550	2747540	3033820	2739600	2962130	2594660	2448040	2533300	2478980	2740840	2560020
O43237	DC1L2_HUMAN	DYNC1LI2	Cytoplasmic dynein 1 light intermediate chain 2	54734600	53786400	53284600	54943300	52587800	53437500	51220500	53898200	51433400	54944900	52643700	55734700
O43242	PSMD3_HUMAN	PSMD3	26S proteasome non-ATPase regulatory subunit 3	142296000	142892000	146535000	144425000	143227000	145943000	134352000	136736000	135783000	135712000	136445000	139054000
O43251	RFOX2_HUMAN	RBFOX2	RNA binding protein fox-1 homolog 2	42931600	42031100	46010300	45108700	45100300	44972000	44126100	45109300	43948400	41873700	43776000	42157800
O43252	PAPS1_HUMAN	PAPSS1	Bifunctional 3'-phosphoadenosine 5'-phosphosulfate synthase 1	113205000	111459000	113143000	110056000	115611000	111763000	117053000	114739000	114351000	114347000	112136000	115269000
O43257	ZNHI1_HUMAN	ZNHIT1	Zinc finger HIT domain-containing protein 1					1521050			1501820			552957
O43261	LEU1_HUMAN	DLEU1	Leukemia-associated protein 1	301224	270337	256852		289205			248728		421032		385442
O43264	ZW10_HUMAN	ZW10	Centromere/kinetochore protein zw10 homolog	23235300	21809000	22821500	21146200	22945700	21658500	22443100	21054200	22758700	20736800	23172600	21621200
O43280	TREA_HUMAN	TREH	Trehalase										157022
O43286	B4GT5_HUMAN	B4GALT5	Beta-1,4-galactosyltransferase 5				21775500		20249700		14920000		15089700
O43290	SNUT1_HUMAN	SART1	U4/U6.U5 tri-snRNP-associated protein 1	22841200	20725000	22862400	21279000	22973400	21792200	23157500	21770200	22408000	21558200	20854200	20861300
O43291	SPIT2_HUMAN	SPINT2	Kunitz-type protease inhibitor 2			315092					306905	152030
O43292	GPAA1_HUMAN	GPAA1	Glycosylphosphatidylinositol anchor attachment 1 protein	18475700	18374000	19227800	18500100	19698500	19460600	18651800	17891300	19626900	19467900	18979600	19169100
O43293	DAPK3_HUMAN	DAPK3	Death-associated protein kinase 3	29803000	30728800	32074900	32884700	30040600	32431700	26944100	15139500	28715600	32366700	28688500	30956500
O43294	TGFI1_HUMAN	TGFB1I1	Transforming growth factor beta-1-induced transcript 1 protein	46933900	51149800	48896300	53246700	47191600	53986200	45256400	48631100	44255800	48247400	42246000	46792800
O43298	ZBT43_HUMAN	ZBTB43	Zinc finger and BTB domain-containing protein 43		3602700		1601140	355157	648216	323865	523885	322625	58771.5	3518330
O43299	AP5Z1_HUMAN	AP5Z1	AP-5 complex subunit zeta-1	1421350	1292100	1448520	1342050	1494100	1407970	1333340	1268480	1503800	1390110	1352350	1247110
O43301	HS12A_HUMAN	HSPA12A	Heat shock 70 kDa protein 12A	2402410	2153960	2498220	2293960	2286830	2089840	2051490	1801920	2149050	2262050	2169410	2232410
O43310	CTIF_HUMAN	CTIF	CBP80/20-dependent translation initiation factor	3771550	4311650	4026930	4320490	3279760	3814570	3418220	4047060	3521400	3893360	3046990	3444980
O43314	VIP2_HUMAN	PPIP5K2	Inositol hexakisphosphate and diphosphoinositol-pentakisphosphate kinase 2	8929100	9063720	8692920	8683050	8665560	8437720	8946660	8707430	9144360	8756250	9228140	8539450
O43318	M3K7_HUMAN	MAP3K7	Mitogen-activated protein kinase kinase kinase 7	6434250	7207200	7146180	6578440	6065100	5961330	6267550	6645590	6671320	7070800	6796300	6442780
O43320	FGF16_HUMAN	FGF16	Fibroblast growth factor 16				337520		273032
O43323	DHH_HUMAN	DHH	Desert hedgehog protein			149055
O43324	MCA3_HUMAN	EEF1E1	Eukaryotic translation elongation factor 1 epsilon-1	58236800	58538200	59762600	61848000	59167800	63650200	58053000	58127700	59892300	58931500	59992400	59710800
O43325	LYRM1_HUMAN	LYRM1	LYR motif-containing protein 1	673169	625016	789428	750654	734266	739374	639840	718009	607610	607236	612612	643121
O43345	ZN208_HUMAN	ZNF208	Zinc finger protein 208			2047000	1699440	2020870			1799000	2438600
O43353	RIPK2_HUMAN	RIPK2	Receptor-interacting serine/threonine-protein kinase 2	12779000	14654900	16449000	14519300	15963000	17475900	17118100	15591000	17947800	13332000	15363000	14862400
O43379	WDR62_HUMAN	WDR62	WD repeat-containing protein 62	305209	246313	328051	287187	335350	284772	281886	238628	259156	220758	311997	208954
O43390	HNRPR_HUMAN	HNRNPR	Heterogeneous nuclear ribonucleoprotein R	392247000	380160000	411228000	384803000	408327000	389289000	383381000	370273000	390909000	366503000	385629000	368300000
O43395	PRPF3_HUMAN	PRPF3	U4/U6 small nuclear ribonucleoprotein Prp3	18638400	18159100	19677000	18208900	19596000	17893700	19624000	17654000	19246500	17885600	19280900	17863600
O43396	TXNL1_HUMAN	TXNL1	Thioredoxin-like protein 1	96605000	94074900	99419400	99886600	102483000	97186100	94999500	98673300	96020500	99154800	93774800	98429200
O43399	TPD54_HUMAN	TPD52L2	Tumor protein D54	120166000	126312000	121775000	126988000	118317000	127253000	118152000	123569000	119720000	121525000	122926000	116209000
O43402	EMC8_HUMAN	EMC8	ER membrane protein complex subunit 8	19113200	16509100	19424700	20029400	20923300	19103200	19210700	19304200	19671000	20081600	17452100	18896000
O43414	ERI3_HUMAN	ERI3	ERI1 exoribonuclease 3	28644000	26730800	31303300	31206500	32238500	31824000	30103800	31589900	31530100	31732700	28579600	33068500
O43422	P52K_HUMAN	THAP12	52 kDa repressor of the inhibitor of the protein kinase		732723	1068150
O43426	SYNJ1_HUMAN	SYNJ1	Synaptojanin-1	13080600	12403400	12486700	12640100	12311500	12781800	12483600	12635900	14459300	11127700	11583600	11426900
O43427	FIBP_HUMAN	FIBP	Acidic fibroblast growth factor intracellular-binding protein	10687200	10925800	11218300	10239300	11140700	11543900	11815700	11190600	11812000	11206100	12047500	11605800
O43432	IF4G3_HUMAN	EIF4G3	Eukaryotic translation initiation factor 4 gamma 3	70133500	71906900	74433800	72618900	72975300	74060700	68556600	71213700	69463600	69316600	66379400	69972300
O43447	PPIH_HUMAN	PPIH	Peptidyl-prolyl cis-trans isomerase H	91005800	79604700	98704800	86543300	97312900	90418000	92500300	88714400	93129500	88509400	87684900	87904000
O43448	KCAB3_HUMAN	KCNAB3	Voltage-gated potassium channel subunit beta-3	143222	1513070	1895550	2071200	12801000	18221000	6724630	2047950	7492780	2016360	1296300	1636370
O43462	MBTP2_HUMAN	MBTPS2	Membrane-bound transcription factor site-2 protease	5736320	5759940	6327170	6391870	5188140	5493510	5387600	5960450	6036590	5406100	5939270	5989110
O43463	SUV91_HUMAN	SUV39H1	Histone-lysine N-methyltransferase SUV39H1	189163
O43464	HTRA2_HUMAN	HTRA2	Serine protease HTRA2, mitochondrial	16494000	16395500	17155800	17121600	16168900	17443900	16309400	18035900	17188700	16884800	17895800	17629900
O43474	KLF4_HUMAN	KLF4	Krueppel-like factor 4			294683								403378
O43488	ARK72_HUMAN	AKR7A2	Aflatoxin B1 aldehyde reductase member 2	72001200	78612600	76461200	82602200	74137600	76711900	75538000	79688200	74288900	76360100	70395700	79769600
O43491	E41L2_HUMAN	EPB41L2	Band 4.1-like protein 2	77598400	82792000	77580600	79260300	80314300	85274700	86204900	108556000	99084900	92986700	85865100	89729900
O43493	TGON2_HUMAN	TGOLN2	Trans-Golgi network integral membrane protein 2	28721100	28387100	26574000	25366300	27293100	26092200	28036100	24797800	26405500	28747200	27505100	25686000
O43502	RA51C_HUMAN	RAD51C	DNA repair protein RAD51 homolog 3	243554	174633	250333	182536	271393		312134		262423		284055
O43504	LTOR5_HUMAN	LAMTOR5	Ragulator complex protein LAMTOR5	14742800	12585100	16018300	14087600	15202000	12225900	13385900	11568000	15064500	11561600	12577400	13071500
O43505	B4GA1_HUMAN	B4GAT1	Beta-1,4-glucuronyltransferase 1	16725400	16788100	17167100	17875700	16271100	17624400	15980300	16836300	17262800	17002500	15867700	15875800
O43516	WIPF1_HUMAN	WIPF1	WAS/WASL-interacting protein family member 1	3272460	3382360	3291500	3561470	3989570	3562750	3648010	3719780	3761970	3380030	3485830	3446950
O43520	AT8B1_HUMAN	ATP8B1	Phospholipid-transporting ATPase IC	10517800	13125400	11425800	12796800	10971800	13084400	10599600	12693500	10862700	12978800	11108400	12492700
O43524	FOXO3_HUMAN	FOXO3	Forkhead box protein O3	724324	858301	853330	807913	873051	869080	792268	848231	806766	726825	736620	790235
O43556	SGCE_HUMAN	SGCE	Epsilon-sarcoglycan	967044	1042050	1273870	1065120	1015880	1180830	849745	1025490	964315	863809	914460	937735
O43561	LAT_HUMAN	LAT	Linker for activation of T-cells family member 1										303273
O43567	RNF13_HUMAN	RNF13	E3 ubiquitin-protein ligase RNF13	15237800	15062800	14590500	15319100	14959900	14351800	15272300	15348200	15328100	16612500	16477800	15961600
O43570	CAH12_HUMAN	CA12	Carbonic anhydrase 12	463498	570062			728498		698177			664202	673381
O43572	AKA10_HUMAN	AKAP10	A-kinase anchor protein 10, mitochondrial	15252700	15163000	14664400	14468100	14038400	15280800	14928500	13854700	14147000	14717100	13279000	14467100
O43583	DENR_HUMAN	DENR	Density-regulated protein	57240700	56267600	51655200	53400700	51955300	54865300	54985400	55843800	55854900	56291100	54104400	55828500
O43592	XPOT_HUMAN	XPOT	Exportin-T	35318000	33922000	34837400	34143800	36129900	33987100	34295500	33160000	34874600	32243000	34550700	32918200
O43598	DNPH1_HUMAN	DNPH1	5-hydroxymethyl-dUMP N-hydrolase	48674500	47012800	64396600	58016800	57154200	57263600	49128800	49371700	47777300	47436000	43551400	46202600
O43612	OREX_HUMAN	HCRT	Hypocretin neuropeptide precursor					477469
O43613	OX1R_HUMAN	HCRTR1	Orexin/Hypocretin receptor type 1	729727	687700	760910	833769	793606	774947	708075			827737	775204	824599
O43614	OX2R_HUMAN	HCRTR2	Orexin receptor type 2										221886
O43615	TIM44_HUMAN	TIMM44	Mitochondrial import inner membrane translocase subunit TIM44	32902600	32376800	32269900	31466400	31800700	30334800	33258600	31598100	33896000	33255400	34216300	33043300
O43617	TPPC3_HUMAN	TRAPPC3	Trafficking protein particle complex subunit 3	23424700	25452300	26395000	25466000	28569700	25163700	22838800	23133100	22049200	22915500	22903200	20799600
O43633	CHM2A_HUMAN	CHMP2A	Charged multivesicular body protein 2a	45361400	47899600	46422900	51209900	47002000	52526800	47968000	49766400	47426600	50166100	48687900	51126300
O43638	FOXS1_HUMAN	FOXS1	Forkhead box protein S1	398595	446661	503608	342267	482421	368179	434463	287272	365340	306967	279607	224710
O43639	NCK2_HUMAN	NCK2	Cytoplasmic protein NCK2	1572570	1939880	1654090	1727800	1668490	1794110	1648160	1727520	1557060	1677380	1683870	1588650
O43653	PSCA_HUMAN	PSCA	Prostate stem cell antigen			334883000				411747000
O43657	TSN6_HUMAN	TSPAN6	Tetraspanin-6	26178500	22407300	23247600	18225500	20883900	17995900	23472700	21469100	23914700	21466000	24048000	18942500
O43660	PLRG1_HUMAN	PLRG1	Pleiotropic regulator 1	16670200	16457600	18772900	17822400	18408200	18097100	17426600	16283000	17005400	16362000	15438500	16059500
O43663	PRC1_HUMAN	PRC1	Protein regulator of cytokinesis 1			2626180		3231220		2793300		3049500	1973020	2709200
O43665	RGS10_HUMAN	RGS10	Regulator of G-protein signaling 10	22066500	20260700	22891600	20698200	20429900	21706100	19943700	21913900	20106300	21922700	19959100	19870200
O43670	ZN207_HUMAN	ZNF207	BUB3-interacting and GLEBS motif-containing protein ZNF207	72060700	71071500	84197300	79540500	83434100	82888800	76251600	70303100	78295200	71934100	68349400	73896200
O43674	NDUB5_HUMAN	NDUFB5	NADH dehydrogenase [ubiquinone] 1 beta subcomplex subunit 5, mitochondrial	25177300	24302200	23760000	23341300	24154900	23220100	24674400	25275600	27447900	25076100	25930800	25683700
O43676	NDUB3_HUMAN	NDUFB3	NADH dehydrogenase [ubiquinone] 1 beta subcomplex subunit 3	26166600	25751100	27047200	26734500	28037400	26698800	26417400	25985000	26968700	27459900	26654800	24769200
O43678	NDUA2_HUMAN	NDUFA2	NADH dehydrogenase [ubiquinone] 1 alpha subcomplex subunit 2	32256600	34893700	38714900	37357500	38687200	37154900	34746800	34369200	34671300	34833300	34170900	31729900
O43681	GET3_HUMAN	GET3	ATPase GET3	244693000	236406000	237823000	228689000	236031000	232596000	255584000	231651000	244440000	243863000	262541000	239997000
O43684	BUB3_HUMAN	BUB3	Mitotic checkpoint protein BUB3	62729300	61141600	66218600	63624400	66946700	62688000	64678600	63073200	63268200	59160000	65356900	57599500
O43688	PLPP2_HUMAN	PLPP2	Phospholipid phosphatase 2	4584380	3184770	3528480	2852600	2872110	3140050	3839110	3245150	3896620	3001830	4043130	3460250
O43704	ST1B1_HUMAN	SULT1B1	Sulfotransferase 1B1	243593	273556	224335	240667	269271	278093	242359	248728	268652	319532	309088	273168
O43707	ACTN4_HUMAN	ACTN4	Alpha-actinin-4	1274450000	1352440000	1460130000	1550010000	1453440000	1510660000	1261030000	1309730000	1246570000	1320480000	1287700000	1310820000
O43708	MAAI_HUMAN	GSTZ1	Maleylacetoacetate isomerase	18147100	19008600	17853800	18929200	18072400	18406500	17532000	18903300	18152500	19159600	17358900	18392600
O43709	BUD23_HUMAN	BUD23	Probable 18S rRNA (guanine-N(7))-methyltransferase	7489840	7949160	6463960	4522730	7300950	6745360	8258840	6059460	5792820	8296810	7555640	6412360
O43711	TLX3_HUMAN	TLX3	T-cell leukemia homeobox protein 3	267577	377694					288457	377346		291489		350422
O43715	TRIA1_HUMAN	TRIAP1	TP53-regulated inhibitor of apoptosis 1						265224
O43716	GATC_HUMAN	GATC	Glutamyl-tRNA(Gln) amidotransferase subunit C, mitochondrial	4051560	3994810	4213710	3496190	4522600	3503680	4203770	3749140	4780850	3251830	3984260	3515980
O43719	HTSF1_HUMAN	HTATSF1	17S U2 SnRNP complex component HTATSF1	22069800	18805400	21009500	19455000	21280400	19683300	23051700	21654200	23200900	21567000	20423600	20931100
O43731	ERD23_HUMAN	KDELR3	ER lumen protein-retaining receptor 3	16341200	19155500	14965200	21354800	15942300	18508900	15725000	19050400	17053500	20441600	15893400	20324700
O43734	CIKS_HUMAN	TRAF3IP2	E3 ubiquitin ligase TRAF3IP2	20593900	2748100	147643	253826	19906400	19863700	1653320	1580780	151451	1530970	25548600	23226200
O43739	CYH3_HUMAN	CYTH3	Cytohesin-3	5504650	5447610	5529750	5007010	6172810	6725760	4475530	5683760	5607390	5030310	5341220	6413900
O43741	AAKB2_HUMAN	PRKAB2	5'-AMP-activated protein kinase subunit beta-2	9290890	8220610	9927550	9779560	9948090	9519160	9381880	9813370	9334100	9591950	8895100	9717210
O43747	AP1G1_HUMAN	AP1G1	AP-1 complex subunit gamma-1	55567100	55785500	55497200	58516400	56588700	56987600	54971100	56252900	54880100	57317900	54691900	56274000
O43752	STX6_HUMAN	STX6	Syntaxin-6	12867100	12827000	12193200	12471600	12334800	12265900	13135200	12532700	12948500	12294600	12458300	12392800
O43759	SNG1_HUMAN	SYNGR1	Synaptogyrin-1	6032370	6739960	5582050	7540060	6618970	6247200	5807100	6656700	6373250	7165860	6170210	7241040
O43760	SNG2_HUMAN	SYNGR2	Synaptogyrin-2	71201800	77113700	69700900	76317300	71791000	76553300	73084100	79545700	69098200	77626400	68944500	79220200
O43761	SNG3_HUMAN	SYNGR3	Synaptogyrin-3	2888960	2977420	2894010	3704330	3123140	3646780	2904880	2941350	3074690	3814940	2772370	3168460
O43765	SGTA_HUMAN	SGTA	Small glutamine-rich tetratricopeptide repeat-containing protein alpha	46652600	48946500	53934500	46814300	53237300	49587900	49283100	47620100	47690600	46975400	49030600	48132700
O43768	ENSA_HUMAN	ENSA	Alpha-endosulfine	46230500	42873000	45247100	43519000	43739600	36581900	49429400	45579400	46688500	39213400	35282800	42872100
O43772	MCAT_HUMAN	SLC25A20	Mitochondrial carnitine/acylcarnitine carrier protein	8312870	9077940	7871980	8579230	8582410	7528030	8332550	7646990	8857650	8493830	8204900	7882310
O43776	SYNC_HUMAN	NARS1	Asparagine--tRNA ligase, cytoplasmic	126869000	126016000	131199000	129857000	132284000	131910000	134755000	130265000	133028000	124988000	130725000	131371000
O43790	KRT86_HUMAN	KRT86	Keratin, type II cuticular Hb6				3452530		3639380		4321150
O43791	SPOP_HUMAN	SPOP	Speckle-type POZ protein	1423830	1786090	1048160	1102400	2590940	3360770	3021420		2174100		2693120	4714710
O43795	MYO1B_HUMAN	MYO1B	Unconventional myosin-Ib	37941100	40175600	38794700	40748000	38959200	40217500	37543400	38908800	37149300	39148500	38636300	39414100
O43805	SSNA1_HUMAN	SSNA1	Microtubule nucleation factor SSNA1											27510300
O43808	PM34_HUMAN	SLC25A17	Peroxisomal membrane protein PMP34	36122100	34700200	39265200	37653900	39252500	38653000	37618700	33316600	38747200	34984100	37691300	35758100
O43809	CPSF5_HUMAN	NUDT21	Cleavage and polyadenylation specificity factor subunit 5	84886700	78648200	92491900	87685600	95754900	87517600	86529300	87780100	83709700	86062500	86803900	81844900
O43812	DUX1_HUMAN	DUX1	Double homeobox protein 1	19904800									29398400
O43813	LANC1_HUMAN	LANCL1	Glutathione S-transferase LANCL1	52487600	56644400	56660900	59239600	52558600	59133100	52763100	57184900	51457800	54090600	52439900	54085200
O43815	STRN_HUMAN	STRN	Striatin	20149600	19913600	20093000	20418900	21083100	20438900	20064300	19373300	20618200	20221400	20412000	19141400
O43818	U3IP2_HUMAN	RRP9	U3 small nucleolar RNA-interacting protein 2	18634900	19101000	17083000	17270100	15277100	15301900	19265600	21500700	21114200	20908700	21295200	19907200
O43819	SCO2_HUMAN	SCO2	Protein SCO2 homolog, mitochondrial	16525900	15096800	16175300	15582100	16495900	14423300	13737500	13915900	14179700	14323200	13392100	13609700
O43822	CF410_HUMAN	CFAP410	Cilia- and flagella-associated protein 410	1489820	1641540	1744260	1886960	1709990	1922600	1535940	1860070	1432310	1805900	1435160	1687710
O43823	AKAP8_HUMAN	AKAP8	A-kinase anchor protein 8	11221100	11329000	11377400	11125700	11049000	11223700	12497900	12912500	10985100	11763100	11600200	11302000
O43824	GTPB6_HUMAN	GTPBP6	Putative GTP-binding protein 6	4767110	4333630	5727080	5028870	5358380	5011210	5452500	4098110	4692500	5145630	5283650	3721380
O43825	B3GT2_HUMAN	B3GALT2	Beta-1,3-galactosyltransferase 2	553972					990360					423206
O43826	G6PT1_HUMAN	SLC37A4	Glucose-6-phosphate exchanger SLC37A4	5674300	5365030	6424970	5504540	6200210	5871530	5456270	4899790	5392140	4892230	5129680	4668020
O43827	ANGL7_HUMAN	ANGPTL7	Angiopoietin-related protein 7									623638
O43837	IDH3B_HUMAN	IDH3B	Isocitrate dehydrogenase [NAD] subunit beta, mitochondrial	28559400	22725200	24902200	24411500	25261300	19183600	23912900	25355700	23442900	27049500	21873900	22563800
O43847	NRDC_HUMAN	NRDC	Nardilysin	28230500	25845100	30511200	28866600	30613100	28336600	28209500	27423100	27997300	27198600	27701000	27574600
O43852	CALU_HUMAN	CALU	Calumenin	518391000	643707000	681765000	681282000	645779000	707918000	524938000	598271000	604126000	585416000	539609000	582639000
O43854	EDIL3_HUMAN	EDIL3	EGF-like repeat and discoidin I-like domain-containing protein 3	106753000	105819000	107327000	115655000	105975000	115021000	100048000	104021000	99977400	105309000	99859000	104907000
O43861	ATP9B_HUMAN	ATP9B	Probable phospholipid-transporting ATPase IIB	2678250	3154790	2925490	3140000	2766550	3357770	2783260	3061820	2692500	2558660	2604240	3245800
O43865	SAHH2_HUMAN	AHCYL1	S-adenosylhomocysteine hydrolase-like protein 1	43260300	47729900	41487600	44751200	40446000	41595000	41030000	43733200	42595000	42477000	42740900	40828500
O43896	KIF1C_HUMAN	KIF1C	Kinesin-like protein KIF1C	8059410	7868300	7641390	7324020	7885310	7510080	7541090	7881270	7715330	7286950	7225790	6880680
O43913	ORC5_HUMAN	ORC5	Origin recognition complex subunit 5	7498280	6740480	6715210	6420030	7744630	7522540	8282470	7055890	7385220	7129190	7180530	6351490
O43918	AIRE_HUMAN	AIRE	Autoimmune regulator		147061
O43920	NDUS5_HUMAN	NDUFS5	NADH dehydrogenase [ubiquinone] iron-sulfur protein 5	49008700	48043600	51304300	47579200	54984800	52251700	53397400	57337200	58624300	54499600	51619500	57954900
O43924	PDE6D_HUMAN	PDE6D	Retinal rod rhodopsin-sensitive cGMP 3',5'-cyclic phosphodiesterase subunit delta	12020500	20552500	11524200	11634600	11682100	11545100	12009300	12144800	14446500	11530300	10763400	10890700
O43929	ORC4_HUMAN	ORC4	Origin recognition complex subunit 4	7090520	6913560	6952080	6658010	7346460	6506630	7363780	6339300	7497900	6873350	7545290	6845430
O43930	PRKY_HUMAN	PRKY	Putative serine/threonine-protein kinase PRKY			554448	556295							545301	628040
O43933	PEX1_HUMAN	PEX1	Peroxisomal ATPase PEX1	7067620	5565500	6348950	6196840	5858060	5489870	7785170	6192520	6375450	5012150	5564600	5794250
O60216	RAD21_HUMAN	RAD21	Double-strand-break repair protein rad21 homolog	58993900	52194400	62191200	58208200	61012300	57255400	61573800	54502500	62542000	57256400	57105300	54424300
O60220	TIM8A_HUMAN	TIMM8A	Mitochondrial import inner membrane translocase subunit Tim8 A												358719
O60231	DHX16_HUMAN	DHX16	Pre-mRNA-splicing factor ATP-dependent RNA helicase DHX16	45720500	42184500	46155500	42279100	45866000	43162300	42984300	41089400	45124000	43554700	42705200	44185000
O60232	ZNRD2_HUMAN	ZNRD2	Protein ZNRD2	16175800	14798900	18834300	16021100	19727900	14975600	16667600	14014200	16940000	13848100	15002700	16063200
O60237	MYPT2_HUMAN	PPP1R12B	Protein phosphatase 1 regulatory subunit 12B	394784	392704	2478420	12119900	748370	56911	2200820	1259570	1212900	822863	653708	522024
O60238	BNI3L_HUMAN	BNIP3L	BCL2/adenovirus E1B 19 kDa protein-interacting protein 3-like	13957900	15380200	16167200	15831900	16032700	17596200	12665500	14897700	14281900	12951800	14135800	14958900
O60239	3BP5_HUMAN	SH3BP5	SH3 domain-binding protein 5	700281	1036400	809771	826324	328935	647978	839244	580492	987666	729703		722997
O60244	MED14_HUMAN	MED14	Mediator of RNA polymerase II transcription subunit 14	6988180	6862270	7189620	6239680	6738780	7046710	5852390	7127390	6654420	6561490	6476000	6280280
O60245	PCDH7_HUMAN	PCDH7	Protocadherin-7	7453180	9122100	7412660	9581750	7745550	9306730	7038780	9149260	7309560	9485320	6774210	9174210
O60256	KPRB_HUMAN	PRPSAP2	Phosphoribosyl pyrophosphate synthase-associated protein 2	31097200	31321300	36660600	35963400	36504200	35292600	31742300	29858300	30371400	32179100	32129800	31497000
O60264	SMCA5_HUMAN	SMARCA5	SWI/SNF-related matrix-associated actin-dependent regulator of chromatin subfamily A member 5	21852600	20092300	21546900	19127400	21942000	19036900	20885700	19859900	21244300	19619500	22306900	19328300
O60266	ADCY3_HUMAN	ADCY3	Adenylate cyclase type 3	1097460	983842	812233	1161270	1437690	1113680	823319	785755	983447	837982	773978	1144630
O60268	K0513_HUMAN	KIAA0513	Uncharacterized protein KIAA0513	2269380	3942820	458538	2053560	2113830	872630	1584710	2763560	1852140	635210	1610060	2107950
O60271	JIP4_HUMAN	SPAG9	C-Jun-amino-terminal kinase-interacting protein 4	28477700	28513200	30092000	29770800	29521500	28402100	29265400	29127100	28534100	28956400	28562100	28633600
O60279	SUSD5_HUMAN	SUSD5	Sushi domain-containing protein 5	18986500	23689700	22924000	23168800	22818000	21946000	22686800	22393600	20542500	22411700	22427600	20277600
O60281	ZN292_HUMAN	ZNF292	Zinc finger protein 292	382323		424259	422048	474743	522928	424850	482574	551437	482119	396927	475977
O60287	NPA1P_HUMAN	URB1	Nucleolar pre-ribosomal-associated protein 1	5655100	5363520	5810750	4903930	6117810	5291010	5629320	4969730	6293790	5247530	5762520	5021700
O60291	MGRN1_HUMAN	MGRN1	E3 ubiquitin-protein ligase MGRN1	4068780	4075410	4498740	4550700	4549980	4145350	4043890	4274650	3718640	4631490	4591080	4450660
O60292	SI1L3_HUMAN	SIPA1L3	Signal-induced proliferation-associated 1-like protein 3	13376600	12211500	14343400	12173600	14384500	13772200	13305600	12691900	13484000	12258700	12952900	12393500
O60293	ZC3H1_HUMAN	ZFC3H1	Zinc finger C3H1 domain-containing protein	7059080	6166700	7100060	7920740	7443150	6768190	5736020	6528570	6980220	7060160	6270890	5888800
O60294	TYW4_HUMAN	LCMT2	tRNA wybutosine-synthesizing protein 4	2736290	2672160	3035540	3026630	3215470	2886390	2899800	2520310	2974360	2592450	2484220	2482870
O60306	AQR_HUMAN	AQR	RNA helicase aquarius	10001400	8957260	10386200	9128010	10640100	9089880	10177500	9537950	10229300	8972190	10320000	9671170
O60313	OPA1_HUMAN	OPA1	Dynamin-like GTPase OPA1, mitochondrial	24312300	23790000	25152200	24180400	24760400	24157800	25018500	23786200	25166500	24071700	24239100	23236600
O60315	ZEB2_HUMAN	ZEB2	Zinc finger E-box-binding homeobox 2	634544	586522	682452	690603	709795	638808	633119	601981	735500	628456	524003	549184
O60318	GANP_HUMAN	MCM3AP	Germinal-center associated nuclear protein	3694940	3700490	4110940	3905570	4030100	3787560	3714610	3910090	3728290	3778280	3609470	3728080
O60331	PI51C_HUMAN	PIP5K1C	Phosphatidylinositol 4-phosphate 5-kinase type-1 gamma	8103490	8979100	8854040	9149080	9424300	9581070	8738010	8378000	8680160	9096280	8997340	9345230
O60333	KIF1B_HUMAN	KIF1B	Kinesin-like protein KIF1B	19448100	19760200	19727200	20510900	19614400	19995100	19357800	20350800	20003900	20498400	18895900	19916800
O60336	MABP1_HUMAN	MAPKBP1	Mitogen-activated protein kinase-binding protein 1	3737100	4005400	3734980	3953010	3765970	4016410	3788240	4335590	3475230	4178430	3811280	4045930
O60337	MARH6_HUMAN	MARCHF6	E3 ubiquitin-protein ligase MARCHF6	2010550	2853370	2238340	2183330	2140770	2151780	2407980	3515010	2098000	2208560	2342530	2201120
O60341	KDM1A_HUMAN	KDM1A	Lysine-specific histone demethylase 1A	13770100	13280100	14385200	14402300	14926700	13864900	13963300	13865000	14532400	13013000	14209100	13709900
O60343	TBCD4_HUMAN	TBC1D4	TBC1 domain family member 4	13208400	12526600	12823000	12766600	12887900	13000800	12748700	13417800	12883000	13358500	12908000	13602900
O60346	PHLP1_HUMAN	PHLPP1	PH domain leucine-rich repeat-containing protein phosphatase 1	104651	98359.6	154209	127085	140527	122925	83929.4	97627.7	103955	88712	94767.3	74642.8
O60347	TBC12_HUMAN	TBC1D12	TBC1 domain family member 12	286992	363669	401924	357000	326578			263579	310701	359514		339737
O60353	FZD6_HUMAN	FZD6	Frizzled-6	3996730	4158200	4940460	4861020	4593730	4484680	4591960	4470350	4645820	4479480	4100490	4534450
O60356	NUPR1_HUMAN	NUPR1	Nuclear protein 1	1993330	2298870	907893	1647310	713814		1297930	1992660	1650320	1801510	1780010	1431500
O60361	NDK8_HUMAN	NME2P1	Putative nucleoside diphosphate kinase	520395000	436645000	548891000	557545000	568719000	592961000	514156000	545487000	526650000	517761000	437249000	497600000
O60381	HBP1_HUMAN	HBP1	HMG box-containing protein 1	444412	559143	541211	508481	673622	580042			244128		639940
O60384	ZN861_HUMAN	ZNF861P	Putative zinc finger protein 861									379324
O60397	COX7S_HUMAN	COX7A2P2	Putative cytochrome c oxidase subunit 7A3, mitochondrial		1329830
O60422	ONEC3_HUMAN	ONECUT3	One cut domain family member 3			42380.6	181277
O60427	FADS1_HUMAN	FADS1	Acyl-CoA (8-3)-desaturase	105373000	106851000	121093000	100390000	125973000	105999000	116128000	113956000	106783000	113039000	113996000	111384000
O60443	GSDME_HUMAN	GSDME	Gasdermin-E	31008000	34462800	32055300	33626800	31564200	33837400	31222900	33149400	30833600	32764200	31549100	33324500
O60447	EVI5_HUMAN	EVI5	Ecotropic viral integration site 5 protein homolog	110900000	109807000	106360000	106777000	109311000	109200000	100870000	113221000	103129000	108950000	107641000	105297000
O60462	NRP2_HUMAN	NRP2	Neuropilin-2	85368600	82493600	88828700	85227400	91844900	90888400	86017900	80308800	93490600	77250800	95108100	81345700
O60476	MA1A2_HUMAN	MAN1A2	Mannosyl-oligosaccharide 1,2-alpha-mannosidase IB	9262950	9680580	9026420	9899040	8557300	9789310	9245160	9463960	8919030	9536000	9083150	10116700
O60479	DLX3_HUMAN	DLX3	Homeobox protein DLX-3	432345			609737
O60481	ZIC3_HUMAN	ZIC3	Zinc finger protein ZIC 3											179118
O60487	MPZL2_HUMAN	MPZL2	Myelin protein zero-like protein 2											1193700
O60488	ACSL4_HUMAN	ACSL4	Long-chain-fatty-acid--CoA ligase 4	49906800	48775900	49512200	45115300	48936200	44724200	48938200	43783700	49522100	40763300	50897200	43053000
O60493	SNX3_HUMAN	SNX3	Sorting nexin-3	124354000	126482000	146819000	152926000	141661000	154259000	122709000	126226000	127636000	127244000	118776000	127857000
O60496	DOK2_HUMAN	DOK2	Docking protein 2	121074						1515620
O60499	STX10_HUMAN	STX10	Syntaxin-10	15416100	14641500	15991300	14604800	14397500	13641800	14555800	14840100	14431000	14167900	14847700	13942200
O60502	OGA_HUMAN	OGA	Protein O-GlcNAcase	129228000	122178000	132022000	120282000	132524000	123976000	130244000	116795000	128828000	116813000	127415000	116015000
O60504	VINEX_HUMAN	SORBS3	Vinexin	25823700	27875600	25451000	26987200	25660300	26641200	26495300	27423000	26633500	27658400	22839400	27575100
O60506	HNRPQ_HUMAN	SYNCRIP	Heterogeneous nuclear ribonucleoprotein Q	310313000	336469000	329003000	307623000	351299000	326251000	324822000	365132000	326980000	319461000	353085000	340787000
O60507	TPST1_HUMAN	TPST1	Protein-tyrosine sulfotransferase 1					5705190	5979460	6112920		5698900		4131050
O60508	PRP17_HUMAN	CDC40	Pre-mRNA-processing factor 17	6868390	6544440	6924530	6426420	6999280	6542600	6407450	6640530	6766100	6315870	6707750	6407560
O60513	B4GT4_HUMAN	B4GALT4	Beta-1,4-galactosyltransferase 4	894145	1076970	1050130	947638	1042110	1100070	1001710		1019850	824994	1432100	836568
O60518	RNBP6_HUMAN	RANBP6	Ran-binding protein 6	12201700	11380500	16050500	6716900	14606100	14933700	33098600	12888500	48686800	43805100	10529600	220578000
O60519	CRBL2_HUMAN	CREBL2	cAMP-responsive element-binding protein-like 2						932277				896636	866747
O60524	NEMF_HUMAN	NEMF	Ribosome quality control complex subunit NEMF	16055900	15784400	15492400	15311300	15904500	15745100	15883900	15835000	15488900	15894300	15946600	15774200
O60542	PSPN_HUMAN	PSPN	Persephin									101139
O60547	GMDS_HUMAN	GMDS	GDP-mannose 4,6 dehydratase	14239300	13204000	14742900	14204300	14606000	14878700	13915000	13699900	13737300	14227600	14402400	14140900
O60551	NMT2_HUMAN	NMT2	Glycylpeptide N-tetradecanoyltransferase 2	16923100	17965700	18252800	19363200	17871000	18959000	16307600	17221100	16996200	17261000	17001700	17589700
O60563	CCNT1_HUMAN	CCNT1	Cyclin-T1	4997360	9180260	8165820	8490080	7695890	9394760	6864580	5650420	8265940	6352040	7377100	7838750
O60565	GREM1_HUMAN	GREM1	Gremlin-1	7200280	11358700	6568350	9512100	6327800	8388890	7624230	11312700	7273370	8645670	6001520	10303600
O60566	BUB1B_HUMAN	BUB1B	Mitotic checkpoint serine/threonine-protein kinase BUB1 beta			118182		123592				155113
O60568	PLOD3_HUMAN	PLOD3	Multifunctional procollagen lysine hydroxylase and glycosyltransferase LH3	50810300	53087700	54602200	58945100	55327900	57974800	52968300	53596600	51991200	54354900	50994100	53932000
O60573	IF4E2_HUMAN	EIF4E2	Eukaryotic translation initiation factor 4E type 2	33917600	26801100	29924400	30025300	33537900	31767800	34001400	32006600	32241900	32475200	28358300	32721400
O60583	CCNT2_HUMAN	CCNT2	Cyclin-T2	3018770	2868050	3300920	3304410	3425060	3205810	3212670	3760430	3331930	3536940	3692840	3566550
O60610	DIAP1_HUMAN	DIAPH1	Protein diaphanous homolog 1	27743000	25018700	26772100	24666900	26476500	24768300	27074900	25749100	27711800	25555100	26231100	25230600
O60613	SEP15_HUMAN	SELENOF	Selenoprotein F	14279500	13002900	12710500	12397800	11643100	12227900	13837600	12916300	13707400	11798800	12403100	13432900
O60636	TSN2_HUMAN	TSPAN2	Tetraspanin-2		53273.2	29427.5	48490.6				46483.2
O60637	TSN3_HUMAN	TSPAN3	Tetraspanin-3	11499200	8307280	10088400	7765760	10380900	7920890	11454500	7185880	11749500	7623240	10580100	7802620
O60645	EXOC3_HUMAN	EXOC3	Exocyst complex component 3	23758900	23982400	23524500	24452000	22467400	23035200	23022600	23547500	22891100	23420900	22823200	23043600
O60664	PLIN3_HUMAN	PLIN3	Perilipin-3	195178000	214127000	208681000	225873000	205329000	219428000	197856000	208876000	194211000	215107000	201582000	210843000
O60669	MOT2_HUMAN	SLC16A7	Monocarboxylate transporter 2	6285200	6303800	6616250	7227120	6767080	7268000	6852980	7484660	7047540	6669570	5932820	7269600
O60671	RAD1_HUMAN	RAD1	Cell cycle checkpoint protein RAD1	1213860	1528520	1721200	1766900	1213920	1485770	1832200	1241230	1988620	1735660	1946090	1385320
O60673	REV3L_HUMAN	REV3L	DNA polymerase zeta catalytic subunit				9173630					1841500
O60676	CST8_HUMAN	CST8	Cystatin-8		543458		886947			1442830
O60678	ANM3_HUMAN	PRMT3	Protein arginine N-methyltransferase 3	6744870	6230950	6637060	5904850	7525920	6094780	6797120	6413010	7086450	6644410	7205220	6652740
O60682	MUSC_HUMAN	MSC	Musculin		2740590						487591
O60683	PEX10_HUMAN	PEX10	Peroxisome biogenesis factor 10	283069	221214	220265	184123	251705	215018	193376	253117	243898	204771	254750	225131
O60684	IMA7_HUMAN	KPNA6	Importin subunit alpha-7	91057100	95699000	95271400	75369300	81881800	70406100	101070000	104544000	77441500	89816400	80945900	85344500
O60688	YPEL1_HUMAN	YPEL1	Protein yippee-like 1				9166050	8170090	14415100
O60701	UGDH_HUMAN	UGDH	UDP-glucose 6-dehydrogenase	343935000	347786000	322868000	343897000	319546000	330085000	324036000	377303000	332921000	351903000	343590000	346817000
O60704	TPST2_HUMAN	TPST2	Protein-tyrosine sulfotransferase 2	2086080	2654030	2674940	3096820		2875760	2400500		2563900	2955730	2463770	2777430
O60711	LPXN_HUMAN	LPXN	Leupaxin	2209030	3451220	2705480	2595220	2400460	3311240	2218410	3199100	3039980	3303560	3087160	3057900
O60716	CTND1_HUMAN	CTNND1	Catenin delta-1	70223700	78472200	76395900	80320600	77082800	77446100	74751400	79707400	76063000	85228200	85184500	82518300
O60725	ICMT_HUMAN	ICMT	Protein-S-isoprenylcysteine O-methyltransferase	15683000	13306400	15852600	15471200	17682500	16851500	15180400	13338700	14405400	12572900	13976700
O60739	EIF1B_HUMAN	EIF1B	Eukaryotic translation initiation factor 1b	151359000	143746000	127410000	131853000	143634000	134100000	154161000	143129000	163301000	140980000	147574000	148043000
O60749	SNX2_HUMAN	SNX2	Sorting nexin-2	53607600	56713100	55609900	57205600	53818900	54949600	52927000	52864400	53592400	55693800	55773600	55587800
O60759	CYTIP_HUMAN	CYTIP	Cytohesin-interacting protein											183411
O60760	HPGDS_HUMAN	HPGDS	Hematopoietic prostaglandin D synthase			5867370
O60762	DPM1_HUMAN	DPM1	Dolichol-phosphate mannosyltransferase subunit 1	42451200	40829100	45212000	43867400	44105400	43804400	42719700	41221100	41533400	41462300	42349800	42236300
O60763	USO1_HUMAN	USO1	General vesicular transport factor p115	93678800	103690000	95350400	107974000	93624600	106896000	92300300	100948000	94080500	102442000	93038900	98961700
O60779	S19A2_HUMAN	SLC19A2	Thiamine transporter 1				583366
O60783	RT14_HUMAN	MRPS14	Small ribosomal subunit protein uS14m	17435600	16278000	16113800	15303000	15318600	14882700	17510000	16122800	17270600	14808900	17240700	15629300
O60784	TOM1_HUMAN	TOM1	Target of Myb1 membrane trafficking protein	21710300	21538900	24533900	21606000	21561600	21968700	19564400	21274800	20622800	22904400	19674300	21549300
O60813	PRA11_HUMAN	PRAMEF11	PRAME family member 11			74867.3
O60825	F262_HUMAN	PFKFB2	6-phosphofructo-2-kinase/fructose-2,6-bisphosphatase 2	4601390	4364870	5507730	4802670	4684970	4932900	4249900	4660960	3830600	4965740	4627800	4378480
O60826	CCD22_HUMAN	CCDC22	Coiled-coil domain-containing protein 22	14005400	13825300	14636400	14390000	14695300	14552600	14917600	14499400	14459500	14515700	14276400	14048300
O60828	PQBP1_HUMAN	PQBP1	Polyglutamine-binding protein 1	22592000	18702000	26937000	23166300	24872800	24517000	22009700	18179400	20681100	17430900	21449000	22024300
O60829	PAGE4_HUMAN	PAGE4	P antigen family member 4		399429									370278
O60830	TI17B_HUMAN	TIMM17B	Mitochondrial import inner membrane translocase subunit Tim17-B	5154220	4781170	5458510	4944260	4953290	3849900	4734640	4109030	4620380	3221870	4336820	4019380
O60831	PRAF2_HUMAN	PRAF2	PRA1 family protein 2	49611800	52443000	50540900	58014500	55792700	56690000	52890900	52326900	48536600	54648300	51815200	56313500
O60832	DKC1_HUMAN	DKC1	H/ACA ribonucleoprotein complex subunit DKC1	38753100	36404400	41470100	41817700	42084900	40400900	38384500	38004200	38525500	37018200	38010900	38799800
O60841	IF2P_HUMAN	EIF5B	Eukaryotic translation initiation factor 5B	160360000	153431000	170729000	162352000	172823000	165755000	161335000	158916000	166259000	157702000	163676000	159192000
O60844	ZG16_HUMAN	ZG16	Zymogen granule membrane protein 16						642076
O60869	EDF1_HUMAN	EDF1	Endothelial differentiation-related factor 1	121441000	121801000	121830000	112587000	109620000	103199000	118679000	126426000	108467000	121356000	100180000	107891000
O60870	KIN17_HUMAN	KIN	DNA/RNA-binding protein KIN17	5383400	4663070	5251720	4651110	4722640	4695430	5687500	4746440	5448070	4207030	4635470	4677170
O60879	DIAP2_HUMAN	DIAPH2	Protein diaphanous homolog 2	6800450	6670270	7320480	7598140	6994920	7767250	7359410	6789850	7500380	7155660	6975080	6940550
O60884	DNJA2_HUMAN	DNAJA2	DnaJ homolog subfamily A member 2	70037700	72517200	67561800	66193500	66980600	66094800	65878000	67474300	68871400	67410600	66731600	68548900
O60885	BRD4_HUMAN	BRD4	Bromodomain-containing protein 4	24382100	22805800	24469000	23024500	24181600	22924500	23957200	23559400	23771300	22220500	23933900	22752500
O60888	CUTA_HUMAN	CUTA	Protein CutA	56321800	60936500	55642600	56210300	62300500	49195900	58174700	50791700	57887300	49798100	57050400	57370500
O60890	OPHN1_HUMAN	OPHN1	Oligophrenin-1	1978950	2091010	2110250	2275770	2196520	2607240	2218080	2216270	2332330	1905130	2148140	2203770
O60894	RAMP1_HUMAN	RAMP1	Receptor activity-modifying protein 1	529303		499000							744328
O60906	NSMA_HUMAN	SMPD2	Sphingomyelin phosphodiesterase 2	250073				481352	171911	267155	253196				234985
O60907	TBL1X_HUMAN	TBL1X	F-box-like/WD repeat-containing protein TBL1X				3397340
O60921	HUS1_HUMAN	HUS1	Checkpoint protein HUS1	1996210	1929670	1881220	2076970	2368840	1985760	2096460	1980320	2199900	1826970	2598670	1670490
O60925	PFD1_HUMAN	PFDN1	Prefoldin subunit 1	12374700	14010600	11722500	10981200	13637700	9820780	11035400	6693600	12782400	9378840	8611300	11511400
O60927	PP1RB_HUMAN	PPP1R11	E3 ubiquitin-protein ligase PPP1R11	24509000	21244900	19021500	20622700	20057000	20332100	25349700	25701500	25647000	22995200	17573200	25635500
O60928	KCJ13_HUMAN	KCNJ13	Inward rectifier potassium channel 13	239038	246886	274669	251984		319271	259524	196980	262010	282513	257135	211697
O60930	RNH1_HUMAN	RNASEH1	Ribonuclease H1	1131320		1350790	1057070	1540950	1293120	1347720	994956	1324210		1407590	857991
O60934	NBN_HUMAN	NBN	Nibrin	10098900	9799280	10564000	9776900	10454400	9942480	10171200	9460060	10177000	9268560	10279700	9533600
O60936	NOL3_HUMAN	NOL3	Nucleolar protein 3	1685030	1641990	1727710	1810160	1811290	1766280	1734780	1405190	1621910	1373410	1519870	1591260
O60942	MCE1_HUMAN	RNGTT	mRNA-capping enzyme	4364100	3941000	4836580	4361510	4753660	4133910	4555860	4083840	4485170	4121200	4453490	4114920
O75019	LIRA1_HUMAN	LILRA1	Leukocyte immunoglobulin-like receptor subfamily A member 1	74481	111632		132275				102813		69747.4	165720
O75027	ABCB7_HUMAN	ABCB7	Iron-sulfur clusters transporter ABCB7, mitochondrial	6410840	6099430	6311090	6298100	6388350	5858660	6248560	5957130	5837970	5892610	6718120	6031450
O75030	MITF_HUMAN	MITF	Microphthalmia-associated transcription factor	1330790	1006380	1172380	1426400	1395400	1204970	1290820	877330	1165750	2019060	1257130	1184980
O75044	SRGP2_HUMAN	SRGAP2	SLIT-ROBO Rho GTPase-activating protein 2	13549300	12853800	13090100	12856700	13155100	12857500	13500500	12736600	13324900	13668400	13353100	13521800
O75051	PLXA2_HUMAN	PLXNA2	Plexin-A2	1708690	1474860	2079490	2680980	2253630	2020270	1567110	1544710	1720690	1410990	1730500	1788990
O75056	SDC3_HUMAN	SDC3	Syndecan-3	884353	1067350	875330	1558810		1512170	888951	1387010		1483860		1364430
O75063	XYLK_HUMAN	FAM20B	Glycosaminoglycan xylosylkinase	5073470	4851990	5762960	5587970	5526790	5616650	4673410	5055160	4863030	4892210	5106780	4482310
O75074	LRP3_HUMAN	LRP3	Low-density lipoprotein receptor-related protein 3		3138420	3414060			4218200			2881220		3026940	4683830
O75083	WDR1_HUMAN	WDR1	WD repeat-containing protein 1	488494000	577333000	503691000	525526000	610630000	575208000	592053000	613838000	642649000	611298000	509080000	599680000
O75084	FZD7_HUMAN	FZD7	Frizzled-7	1785920	1759940	1543690	1367750	1698550	1431990	1564590	1583260	1561660	1960920	1571300	1840370
O75094	SLIT3_HUMAN	SLIT3	Slit homolog 3 protein	999029	2346170	1758460	2075140	1589840	1516730		1076420	1735420	1207010	739930	1123750
O75095	MEGF6_HUMAN	MEGF6	Multiple epidermal growth factor-like domains protein 6	3973060	6231780	3981910	6460970	4343170	6500170	3853320	6312000	3440830	6619370	4139640	6255000
O75096	LRP4_HUMAN	LRP4	Low-density lipoprotein receptor-related protein 4	13891800			15409900	18770900					16955100
O75110	ATP9A_HUMAN	ATP9A	Probable phospholipid-transporting ATPase IIA	6807840	3594320	8946110	4234170	3091520	3393190	4528490	2929700	24651000	5751600	5894550	4797110
O75113	N4BP1_HUMAN	N4BP1	NEDD4-binding protein 1	6750500	1830810	5964580	1426160	1125400	1390690	1280530	7782180	7367010	7152400	7462440	1274000
O75116	ROCK2_HUMAN	ROCK2	Rho-associated protein kinase 2	34838500	33782900	34998200	32943300	33779700	34166600	34166100	34671200	34506500	34266100	33820700	34336800
O75122	CLAP2_HUMAN	CLASP2	CLIP-associating protein 2	7959090	8064180	8385910	8198830	8332610	8131080	7972440	7968200	8095230	7522090	7949360	7687310
O75127	PTCD1_HUMAN	PTCD1	Pentatricopeptide repeat-containing protein 1, mitochondrial	1049050	1440850	1584850	1536820	1897370	1346440	1265280	1371830	1779160	1112230	1686850	1354120
O75129	ASTN2_HUMAN	ASTN2	Astrotactin-2					1135360	1071240					404507
O75131	CPNE3_HUMAN	CPNE3	Copine-3	149071000	144546000	148702000	144987000	149763000	139994000	143455000	143172000	144172000	139159000	148664000	141393000
O75143	ATG13_HUMAN	ATG13	Autophagy-related protein 13	7825490	8254290	8100620	7576460	9412070	8156270	7801620	8343550	8080040	7957930	7646620	7677040
O75146	HIP1R_HUMAN	HIP1R	Huntingtin-interacting protein 1-related protein	4327090	4994860	4811760	5129110	4489330	5158620	4596670	4847080	4308590	5177020	4434300	4994980
O75147	OBSL1_HUMAN	OBSL1	Obscurin-like protein 1	6665680	7082110	6761650	6561920	6846190	6638510	6701680	6603200	6390390	6256000	6333520	6278380
O75150	BRE1B_HUMAN	RNF40	E3 ubiquitin-protein ligase BRE1B	14380800	14293000	14738400	14152900	15132100	14213500	15164900	14467900	15039800	13987300	14347800	14051400
O75151	PHF2_HUMAN	PHF2	Lysine-specific demethylase PHF2	11082400	12231700	10662000	10470200	8740080	9285250	9842150	9580630	11136500	10917700	9910800	8915750
O75152	ZC11A_HUMAN	ZC3H11A	Zinc finger CCCH domain-containing protein 11A	7773240	6684040	7996250	7156050	7589090	7365990	7611750	6729200	7317100	6773720	7232020	7014180
O75153	CLU_HUMAN	CLUH	Clustered mitochondria protein homolog	21738500	19638400	22771100	19062600	23331500	19539000	22305900	19618900	22507900	18192300	21988000	19289100
O75154	RFIP3_HUMAN	RAB11FIP3	Rab11 family-interacting protein 3			443396
O75155	CAND2_HUMAN	CAND2	Cullin-associated NEDD8-dissociated protein 2	2360240	2296670	2752520	3116360	2647910	2731980	2331040	1849920	2565030	2517630	2203480	2884900
O75157	T22D2_HUMAN	TSC22D2	TSC22 domain family protein 2	6276200	6359500	6913150	7090620	6564240	6955640	5787870	6244090	6411050	6677080	5937990	6049160
O75165	DJC13_HUMAN	DNAJC13	DnaJ homolog subfamily C member 13	48845300	46836800	49576100	48519800	49596600	49726100	48192500	46439900	48781800	46252900	49144800	47311200
O75167	PHAR2_HUMAN	PHACTR2	Phosphatase and actin regulator 2	3641380	3721330	3771940	3811200	3798570	3524540	4000790	3812500	3546550	3512000	3687190	3728960
O75170	PP6R2_HUMAN	PPP6R2	Serine/threonine-protein phosphatase 6 regulatory subunit 2	11979600	12768000	12396200	12989600	12524900	13142400	11643400	12479400	12164500	12839600	12154200	12703200
O75175	CNOT3_HUMAN	CNOT3	CCR4-NOT transcription complex subunit 3	18923500	18617100	18676600	17394500	17725700	17535000	18241500	18508700	17886700	18322600	19200100	18859200
O75177	CREST_HUMAN	SS18L1	Calcium-responsive transactivator	779694	826425	767202	889548	924150	785326	715858	785029	893001	947797	707077	774740
O75179	ANR17_HUMAN	ANKRD17	Ankyrin repeat domain-containing protein 17	13010600	13295900	13578400	12842200	13532100	12982700	13329100	12938300	13262000	12598900	13015000	12702300
O75182	SIN3B_HUMAN	SIN3B	Paired amphipathic helix protein Sin3b	8407600	8289070	9468930	9215230	9023450	9065830	9073710	8131560	8974090	7723250	8223170	8556410
O75185	AT2C2_HUMAN	ATP2C2	Calcium-transporting ATPase type 2C member 2	631815	545744	725656	7477030	691409	1641920	156073	621239	553039	1209230	586994	905127
O75190	DNJB6_HUMAN	DNAJB6	DnaJ homolog subfamily B member 6	26156100	30087900	27081600	26959700	28656700	27573500	29206000	27983600	27556700	28249900	25571600	27085500
O75192	PX11A_HUMAN	PEX11A	Peroxisomal membrane protein 11A	1472490	1303740			1733520		1441250	1785230	2090430	1504510	1213970	1423230
O75197	LRP5_HUMAN	LRP5	Low-density lipoprotein receptor-related protein 5	285061			321752	341212	360021			322202	316391
O75204	TM127_HUMAN	TMEM127	Transmembrane protein 127		5990430			7592030		5927070	4599200
O75208	COQ9_HUMAN	COQ9	Ubiquinone biosynthesis protein COQ9, mitochondrial	7074380	6852160	6808820	6146270	7143120	6726640	6780450	5775570	7118950	5751300	6239510	5884860
O75223	GGCT_HUMAN	GGCT	Gamma-glutamylcyclotransferase	38500400	44876400	40624800	41571400	40770700	41485200	39041500	42691000	40549300	43983000	42796500	42584700
O75251	NDUS7_HUMAN	NDUFS7	NADH dehydrogenase [ubiquinone] iron-sulfur protein 7, mitochondrial	31673000	28836400	29418500	29192700	31294100	28886400	33262200	28381700	31898200	29947400	30727300	32973100
O75264	SIM24_HUMAN	SMIM24	Small integral membrane protein 24									180402
O75290	Z780A_HUMAN	ZNF780A	Zinc finger protein 780A					55219.5	58157.6			78130.6	35754.8
O75298	RTN2_HUMAN	RTN2	Reticulon-2	5349850	6566110	5697060	6983190	5434940	7117790	5120090	6276030	4664900	7602100	4895980	6841640
O75306	NDUS2_HUMAN	NDUFS2	NADH dehydrogenase [ubiquinone] iron-sulfur protein 2, mitochondrial	47648900	45212700	47813400	43896500	46413200	43789200	47733500	45641900	43232200	47320200	47698900	43551800
O75309	CAD16_HUMAN	CDH16	Cadherin-16	236268	284257	315624	381347	359150	321704	269684	305931	261488			301280
O75312	ZPR1_HUMAN	ZPR1	Zinc finger protein ZPR1	15119100	152999000	15860600	14754800	15643600	14339800	14208400	15064500	15977800	15556800	126651000	15347100
O75317	UBP12_HUMAN	USP12	Ubiquitin carboxyl-terminal hydrolase 12	4398960	3836210	5432380	5105460	5200170	5129400	4405280	4477060	4434400	3961450	4169270	4869850
O75319	DUS11_HUMAN	DUSP11	RNA/RNP complex-1-interacting phosphatase				2675550			2951210			2289860
O75323	NIPS2_HUMAN	NIPSNAP2	Protein NipSnap homolog 2	28081300	25439300	25981600	25898000	26850600	27161000	28803100	27895600	27152400	27749700	28606000	27723600
O75326	SEM7A_HUMAN	SEMA7A	Semaphorin-7A	24361400	29061300	52342000	25618900	19704500	18361500	27322800	31956600	24055000	25945100	25800600	26312200
O75340	PDCD6_HUMAN	PDCD6	Programmed cell death protein 6	84194800	78952200	76819800	85578100	79975100	85345400	80802100	85264300	74187800	83891800	75178700	85286800
O75347	TBCA_HUMAN	TBCA	Tubulin-specific chaperone A	143910000	145372000	141705000	141242000	135241000	137336000	130492000	136576000	133999000	122523000	130478000	135576000
O75348	VATG1_HUMAN	ATP6V1G1	V-type proton ATPase subunit G 1	55875000	54864000	54329500	46347500	51272600	48209500	55688800	51157200	51813700	49954200	57044000	55537100
O75351	VPS4B_HUMAN	VPS4B	Vacuolar protein sorting-associated protein 4B	43573700	42208500	46482200	45390900	46298100	44888800	44220200	44341400	44263400	45087800	43893800	43944600
O75352	MPU1_HUMAN	MPDU1	Mannose-P-dolichol utilization defect 1 protein	60970000	65828800	69173000	73092100	71132800	66827000	63806500	69719300	68839700	66610900	63593400	59484800
O75354	ENTP6_HUMAN	ENTPD6	Ectonucleoside triphosphate diphosphohydrolase 6	653221	590737	819841	656664	654480	853945	658823	623273	784173	704638	642614	570199
O75356	ENTP5_HUMAN	ENTPD5	Nucleoside diphosphate phosphatase ENTPD5	30274000				29565900		29238400
O75362	ZN217_HUMAN	ZNF217	Zinc finger protein 217	362930	486194	388910	284328	315588	250065	270530	262907		309630	434629
O75365	TP4A3_HUMAN	PTP4A3	Protein tyrosine phosphatase type IVA 3							836827
O75367	H2AY_HUMAN	MACROH2A1	Core histone macro-H2A.1	190222000	219393000	220323000	215690000	186283000	207063000	191193000	193570000	218584000	197965000	218532000	210468000
O75368	SH3L1_HUMAN	SH3BGRL	Adapter SH3BGRL	107689000	107934000	102103000	107977000	103466000	101133000	102599000	97356900	103248000	105381000	93094600	101489000
O75369	FLNB_HUMAN	FLNB	Filamin-B	217274000	252326000	243123000	265418000	243460000	266235000	222947000	245120000	222259000	242710000	236434000	244731000
O75373	ZN737_HUMAN	ZNF737	Zinc finger protein 737								9161400
O75376	NCOR1_HUMAN	NCOR1	Nuclear receptor corepressor 1	5634550	5305860	5933980	6263250	5537400	5816190	5562420	5762740	5419150	5259110	4721910	5619170
O75379	VAMP4_HUMAN	VAMP4	Vesicle-associated membrane protein 4	9545420	10316600	9729860	10006500	8050740	9526890	7505840	9092910	8243390	9325690	9138080	10302000
O75380	NDUS6_HUMAN	NDUFS6	NADH dehydrogenase [ubiquinone] iron-sulfur protein 6, mitochondrial	28436900	34049600	35231600	36197100	35255300	35228300	29599500	30797300	30959600	28016600	30771400	26938600
O75381	PEX14_HUMAN	PEX14	Peroxisomal membrane protein PEX14	17210900	17658500	17998900	17256100	17588800	17069000	17391200	17986000	16846000	16887900	17405100	16786500
O75382	TRIM3_HUMAN	TRIM3	Tripartite motif-containing protein 3	20137500	20481900	20784800	22057000	22020400	20449800	20749100	20870400	20557200	20565500	20051500	19915500
O75385	ULK1_HUMAN	ULK1	Serine/threonine-protein kinase ULK1	2146760	2125740	1994790	1884370	2081720	2117950	2176820	2243030	1927820	2092920	2055010	1963110
O75386	TULP3_HUMAN	TULP3	Tubby-related protein 3	1296970	1379940	1609570	1603720	1581220	1466580	1332030	1352770	1252990	1371390	1496670	1505450
O75388	GPR32_HUMAN	GPR32	Probable G-protein coupled receptor 32		1443760		440109			1613300			1236550	440534	554051
O75390	CISY_HUMAN	CS	Citrate synthase, mitochondrial	187273000	180623000	175870000	151731000	166697000	162650000	193454000	189694000	184378000	181366000	182411000	184183000
O75391	SPAG7_HUMAN	SPAG7	Sperm-associated antigen 7	14761800	12631800	14709800	13595700	14888600	13386200	15601700	13858400	15122000	14169300	14618800	12334000
O75394	RM33_HUMAN	MRPL33	Large ribosomal subunit protein bL33m	19450300	19603600	20297100	20815700	20772300	20391400	20012200	18313700	20162900	19201400	20818100	18845000
O75396	SC22B_HUMAN	SEC22B	Vesicle-trafficking protein SEC22b	265393000	301637000	284247000	313199000	279767000	311426000	267389000	281738000	265098000	299591000	273372000	286625000
O75398	DEAF1_HUMAN	DEAF1	Deformed epidermal autoregulatory factor 1 homolog				286864	391696				426849		1088210
O75400	PR40A_HUMAN	PRPF40A	Pre-mRNA-processing factor 40 homolog A	37568500	38589200	38197400	38182700	37991200	39840300	38642800	37892800	39355900	37136000	38380200	38301700
O75410	TACC1_HUMAN	TACC1	Transforming acidic coiled-coil-containing protein 1	11059200	10921800	10862500	10104900	10757300	10321900	10769900	9913360	10536400	9686460	10023500	9957170
O75414	NDK6_HUMAN	NME6	Nucleoside diphosphate kinase 6	2530880	3173700	3371820	2794400	3108660	2815030	2852380	2916150	3160040	2110980	2755470	3300690
O75420	GGYF1_HUMAN	GIGYF1	GRB10-interacting GYF protein 1	1483090	1660290	1699630	1568320	1902750	1672110	1470630	1783330	1462350	1719370	1919200
O75427	LRCH4_HUMAN	LRCH4	Leucine-rich repeat and calponin homology domain-containing protein 4	4406680	4557860	4519220	4382850	3977310	4381560	4590340	4800620	4522550	4360970	4479400	4355580
O75431	MTX2_HUMAN	MTX2	Metaxin-2	19988900	20087700	19882000	19924800	20073400	19305800	19706100	19687500	21350200	18152000	19212400	18802300
O75436	VP26A_HUMAN	VPS26A	Vacuolar protein sorting-associated protein 26A	87644000	85887400	91648600	91973200	92672400	88897000	87566500	85886700	84128900	86129900	85776300	84489500
O75437	ZN254_HUMAN	ZNF254	Zinc finger protein 254	178405					281475
O75438	NDUB1_HUMAN	NDUFB1	NADH dehydrogenase [ubiquinone] 1 beta subcomplex subunit 1	9697600	8165850	10400300	7922690	10202400	8772360	9171440	7842170	8694020	7581180	8086470	8467040
O75439	MPPB_HUMAN	PMPCB	Mitochondrial-processing peptidase subunit beta	27684200	27081100	28151600	26863400	29420000	28191800	27257700	26569800	27845100	27181600	28076400	26466200
O75444	MAF_HUMAN	MAF	Transcription factor Maf			250740
O75446	SAP30_HUMAN	SAP30	Histone deacetylase complex subunit SAP30	1893740	1983150	1802420	1908220	1822980	1816330	1569900	1833800	1559950	1733850	1940470	1487460
O75448	MED24_HUMAN	MED24	Mediator of RNA polymerase II transcription subunit 24	6534190	6204440	6390890	5785120	6131740	6018690	6493090	6251630	6724400	5619650	6383040	5894490
O75449	KTNA1_HUMAN	KATNA1	Katanin p60 ATPase-containing subunit A1	2080190	2329080	2488110	2085600	2442300	2011670	2486080	2214110	2520440	2172770	2499800	1736380
O75475	PSIP1_HUMAN	PSIP1	PC4 and SFRS1-interacting protein	57360200	52590200	61735200	55105900	63419700	55246300	57724200	53414800	55872600	50750100	58245400	50006500
O75477	ERLN1_HUMAN	ERLIN1	Erlin-1	78369500	72513900	80262000	73582200	81023300	73971700	76671600	71794600	78202700	71092400	77815500	69928300
O75489	NDUS3_HUMAN	NDUFS3	NADH dehydrogenase [ubiquinone] iron-sulfur protein 3, mitochondrial	48694700	43487800	53245800	50035700	52821400	50844400	51626500	46893700	50690000	50676100	49896300	47034700
O75494	SRS10_HUMAN	SRSF10	Serine/arginine-rich splicing factor 10	56721900	54824300	54417300	53834800	61104700	55499500	53384800	61991400	61555500	54262300	52397900	61383000
O75503	CLN5_HUMAN	CLN5	Bis(monoacylglycero)phosphate synthase CLN5	11147200	10848300	10692200	12696200	11345400	12116000	10976000	10690900	11241100	11715200	11625200	12022200
O75521	ECI2_HUMAN	ECI2	Enoyl-CoA delta isomerase 2	106033000	103675000	114049000	109380000	109035000	105668000	102963000	98850000	101187000	94558400	106592000	97301900
O75525	KHDR3_HUMAN	KHDRBS3	KH domain-containing, RNA-binding, signal transduction-associated protein 3	27822000	20333800	29077000	21507700	29305100	21054500	25622000	23177800	26947900	22480300	27310900	22084300
O75526	RMXL2_HUMAN	RBMXL2	RNA-binding motif protein, X-linked-like-2												3469740
O75528	TADA3_HUMAN	TADA3	Transcriptional adapter 3	2083070	2169000	1967100	1848030	1755290	1724470	2085450	1909390	1895010	1963990	1773470	1792860
O75529	TAF5L_HUMAN	TAF5L	TAF5-like RNA polymerase II p300/CBP-associated factor-associated factor 65 kDa subunit 5L	2384280	2195040	2661770	2323690	2010020	2584690	2650520	2409960	2370080	1916690	2312190	1390590
O75530	EED_HUMAN	EED	Polycomb protein EED	5380300	4480560	5018780	4083990	5054980	4354820	5479960	4449280	5969130	3824140	5152590	4073300
O75531	BAF_HUMAN	BANF1	Barrier-to-autointegration factor	178255000	152640000	189646000	185400000	230869000	172908000	184363000	149358000	190373000	168586000	168404000	193834000
O75533	SF3B1_HUMAN	SF3B1	Splicing factor 3B subunit 1	62288700	63557200	66260700	64983200	64717500	63894700	63912700	65415400	64496100	63933600	62456100	62676000
O75534	CSDE1_HUMAN	CSDE1	Cold shock domain-containing protein E1	75870000	75124900	77613800	70050500	76370000	71012000	76946000	69163900	75530000	69961700	79344800	69538600
O75554	WBP4_HUMAN	WBP4	WW domain-binding protein 4	17895700	18988000	20101000	16726900	18669000	17853500	19560900	18268200	20781700	17473400	18799600	17645100
O75564	JERKY_HUMAN	JRK	Jerky protein homolog					978962
O75569	PRKRA_HUMAN	PRKRA	Interferon-inducible double-stranded RNA-dependent protein kinase activator A	37188900	40924900	40285500	39584300	36447100	39174600	36778100	38234200	35320400	40068800	41977000	38739000
O75575	RPC9_HUMAN	CRCP	DNA-directed RNA polymerase III subunit RPC9	1370730	1180960	1632230	1481470	1702260	1285390	1425770	1310830	1428580
O75578	ITA10_HUMAN	ITGA10	Integrin alpha-10			46053.6	67309.3		97569.7				69687.2
O75581	LRP6_HUMAN	LRP6	Low-density lipoprotein receptor-related protein 6	5197170	5332430	5695400	5986810	5652310	5753820	5245760	5122490	5395980	4878780	5905200	5234350
O75586	MED6_HUMAN	MED6	Mediator of RNA polymerase II transcription subunit 6	2769440	3079540	2433440	2629850	2148790	3603700	3912730	2436370	3588980	5996150	3909840	3848910
O75592	MYCB2_HUMAN	MYCBP2	E3 ubiquitin-protein ligase MYCBP2	13757500	13291600	16448500	15368200	15678200	16082200	14612900	14106300	14187400	14412800	13277000	13632200
O75600	KBL_HUMAN	GCAT	2-amino-3-ketobutyrate coenzyme A ligase, mitochondrial	4510910	4946020	5219270	5311880	5128090	5743150	4663330	4508210	4980440	5210370	4225940	4667330
O75603	GCM2_HUMAN	GCM2	Chorion-specific transcription factor GCMb							341192	448196			942756
O75607	NPM3_HUMAN	NPM3	Nucleoplasmin-3	47727500	49435600	46458700	47523100	46565400	44878500	49602700	43377300	48763900	45879900	51885500	46912400
O75608	LYPA1_HUMAN	LYPLA1	Acyl-protein thioesterase 1	48842900	44440900	49524200	46158200	47962600	46900300	47637200	49394000	48235800	46930400	46517500	45870700
O75616	ERAL1_HUMAN	ERAL1	GTPase Era, mitochondrial	7151490	7016830	7091130	8440190	7648060	5763740	8867390	6869100	8294690	6395030	19160500	6760850
O75628	REM1_HUMAN	REM1	GTP-binding protein REM 1					3011850
O75629	CREG1_HUMAN	CREG1	Protein CREG1	13290700	10176700	11721600	8361830	9128540		11629400	8309290	10586000	8508310	9674180	11884000
O75631	UPK3A_HUMAN	UPK3A	Uroplakin-3a	87686.7
O75635	SPB7_HUMAN	SERPINB7	Serpin B7	7963150	10867800	9262130	10209100	8883470	12825100	7780330	10544400	9423160	9878370	8776560	11888100
O75636	FCN3_HUMAN	FCN3	Ficolin-3						109898	177273
O75638	CTAG2_HUMAN	CTAG2	Cancer/testis antigen 2		354556		454184	497393	406554			378333		409342	1122100
O75643	U520_HUMAN	SNRNP200	U5 small nuclear ribonucleoprotein 200 kDa helicase	75810700	71692800	77059700	73675100	77294000	74286100	77099100	74095000	77084600	73631800	76326900	71411700
O75648	MTU1_HUMAN	TRMU	Mitochondrial tRNA-specific 2-thiouridylase 1	12301800	1035110	18666100	22054900	19505000	1268770	1225150	1155500	25439700	57109000	5939960	25715000
O75663	TIPRL_HUMAN	TIPRL	TIP41-like protein	53012900	49879500	52310400	51773800	53317700	50841400	53861100	51538800	52997800	51908800	50517200	51624900
O75665	OFD1_HUMAN	OFD1	Centriole and centriolar satellite protein OFD1	25187700	19540900	25091000	19386300	25006500	20581700	24994800	20328600	24162200	20887200	22397100	19407100
O75674	TM1L1_HUMAN	TOM1L1	TOM1-like protein 1	15922200	16134400	16214500	16183300	16903800	16111400	17281800	17329300	18199200	18116800	15601600	16009100
O75676	KS6A4_HUMAN	RPS6KA4	Ribosomal protein S6 kinase alpha-4	4960160	4580370	5464450	4534850	5081370	4950860	4606710	5002940	4809440	4231920	4809010	4497800
O75677	RFPL1_HUMAN	RFPL1	Ret finger protein-like 1					360557
O75679	RFPL3_HUMAN	RFPL3	Ret finger protein-like 3		2462710	1337360		1428210
O75683	SURF6_HUMAN	SURF6	Surfeit locus protein 6	29275900	30660500	26878900	27156600	26014300	27877300	28321100	28413600	28693400	28370400	28642600	26110400
O75688	PPM1B_HUMAN	PPM1B	Protein phosphatase 1B	32772400	35334400	34243900	34005600	34822700	33217300	35773500	34483700	29604700	36261800	34083100	34946900
O75691	UTP20_HUMAN	UTP20	Small subunit processome component 20 homolog	18003400	16969700	19358200	16558900	19094000	16590900	18775200	16987300	18463700	17107500	18400800	16662000
O75694	NU155_HUMAN	NUP155	Nuclear pore complex protein Nup155	34217000	34242700	36365900	35025500	36216100	35773400	35258300	34725300	34683800	34259600	34484300	33992500
O75695	XRP2_HUMAN	RP2	Protein XRP2	16200100	17770900	18501300	18503800	18490300	18572300	16895800	17268100	17394300	17264100	17452300	17823500
O75712	CXB3_HUMAN	GJB3	Gap junction beta-3 protein	24046.7
O75717	WDHD1_HUMAN	WDHD1	WD repeat and HMG-box DNA-binding protein 1	19017700	14116700	19090100	12353300	20641800	13504000	19759100	13583900	18579600	11634400	19740300	13380700
O75718	CRTAP_HUMAN	CRTAP	Cartilage-associated protein	67793600	63330200	63936400	86170200	56428300	73288400	65241900	66693700	57141000	72556000	69306100	74547800
O75746	S2512_HUMAN	SLC25A12	Electrogenic aspartate/glutamate antiporter SLC25A12, mitochondrial	20895900	19127700	20590300	19079100	20848100	19440900	21013400	19051400	20355700	18896300	20713000	19638300
O75747	P3C2G_HUMAN	PIK3C2G	Phosphatidylinositol 3-kinase C2 domain-containing subunit gamma	381704	299175	336545		1548620	1756300	330451	13450900	526656	562065	613996	1339880
O75771	RA51D_HUMAN	RAD51D	DNA repair protein RAD51 homolog 4	371103		467769		309820	392631	443654	252523			467428	279761
O75787	RENR_HUMAN	ATP6AP2	Renin receptor	23756200	21354200	23095500	20451200	22276900	20741900	25058300	21029700	21243300	23510400	23324300	23009100
O75792	RNH2A_HUMAN	RNASEH2A	Ribonuclease H2 subunit A	13396300	10781100	13386000	11000800	14004400	11006000	13752700	10684700	12706500	9759920	12363200	10445000
O75794	CD123_HUMAN	CDC123	Translation initiation factor eIF2 assembly protein	7334330	6637280	7349580	5466550	7846520	6657900	7237210	6375860	7133800	6131500	7175620	6084060
O75800	ZMY10_HUMAN	ZMYND10	Zinc finger MYND domain-containing protein 10				899651					892717	962693
O75807	PR15A_HUMAN	PPP1R15A	Protein phosphatase 1 regulatory subunit 15A			358310
O75808	CAN15_HUMAN	CAPN15	Calpain-15	874050	889003	673118	751511	771634	710379	785162	868979	598210	720772	859181	978837
O75815	BCAR3_HUMAN	BCAR3	Breast cancer anti-estrogen resistance protein 3	2742800	2902280	2771760	2344790	3215560	3685380	2537320	2636920	2802480	2956170	2740410	2600870
O75817	POP7_HUMAN	POP7	Ribonuclease P protein subunit p20	5210900	5631080	4765210	4951320	5148240	5264220	4575180	5485860	4797120	5520620	5647930	6023320
O75818	RPP40_HUMAN	RPP40	Ribonuclease P protein subunit p40	7301190	7144240	7594780	7346680	7421300	7786600	7516900	6788270	7619580	6919970	7563700	6917620
O75820	ZN189_HUMAN	ZNF189	Zinc finger protein 189					210607
O75821	EIF3G_HUMAN	EIF3G	Eukaryotic translation initiation factor 3 subunit G	113368000	115999000	117040000	115148000	114074000	111043000	110463000	113853000	110319000	111290000	114003000	110575000
O75822	EIF3J_HUMAN	EIF3J	Eukaryotic translation initiation factor 3 subunit J	84563800	85305100	87462100	91978500	90096800	90592300	87947800	88407200	85113100	90693800	86349800	92773400
O75828	CBR3_HUMAN	CBR3	Carbonyl reductase [NADPH] 3	209391000	232089000	234850000	237603000	225519000	241138000	225891000	227836000	226970000	232452000	225622000	220375000
O75829	CNMD_HUMAN	CNMD	Leukocyte cell-derived chemotaxin 1								199095	198360
O75832	PSD10_HUMAN	PSMD10	26S proteasome non-ATPase regulatory subunit 10	60484600	68944900	55781100	58362000	57389700	58340500	67685100	64300200	53686900	59675600	66014600	69032200
O75843	AP1G2_HUMAN	AP1G2	AP-1 complex subunit gamma-like 2	5233330	4098040	4836120				4374290	6255700				4926720
O75844	FACE1_HUMAN	ZMPSTE24	CAAX prenyl protease 1 homolog	66202300	51723200	48895100	44466100	41545200	44063800	64775800	84786700	51665500	65890300	65382500	74660100
O75845	SC5D_HUMAN	SC5D	Lathosterol oxidase		1482540	1367390			1237800		1366990		1438290	1237980	1336030
O75864	PPR37_HUMAN	PPP1R37	Protein phosphatase 1 regulatory subunit 37	3519310	3587500	2892200	3010400	3271380	3344380	3102050	3268240	3125870	3421740	3370410	3715960
O75874	IDHC_HUMAN	IDH1	Isocitrate dehydrogenase [NADP] cytoplasmic	143687000	143075000	144286000	145012000	138281000	144132000	139486000	143913000	140070000	139984000	144851000	137826000
O75879	GATB_HUMAN	GATB	Glutamyl-tRNA(Gln) amidotransferase subunit B, mitochondrial	5181940	4588600	5845120	4098880	5610490	4673160	5191030	4077530	5578460	4104750	4543620	4658590
O75880	SCO1_HUMAN	SCO1	Protein SCO1 homolog, mitochondrial	16368600	15343700	16388800	15546700	17448700	16074200	17185700	14933500	16692700	15520500	17861400	15339300
O75882	ATRN_HUMAN	ATRN	Attractin	9281920	9623420	9951620	10098500	9525640	10352000	8908600	9545020	9265920	9203120	9221340	9144010
O75884	RBBP9_HUMAN	RBBP9	Serine hydrolase RBBP9	20317000	18886300	18604400	18978500	19655000	17830500	19070600	20146500	19074800	18288000	20899500	19181600
O75886	STAM2_HUMAN	STAM2	Signal transducing adapter molecule 2	25492600	25976600	25655600	25448500	25289000	26205700	25933200	26980800	26043900	26617200	25854900	26281800
O75891	AL1L1_HUMAN	ALDH1L1	Cytosolic 10-formyltetrahydrofolate dehydrogenase		558362	169123	140668	4825770		194351		520890	644890	228878
O75896	TUSC2_HUMAN	TUSC2	Tumor suppressor candidate 2	1120470	1019410	969038	989641	1166160	1105250	1002350	1211170		1252440	898931	1230340
O75900	MMP23_HUMAN	MMP23B	Matrix metalloproteinase-23											1329940
O75907	DGAT1_HUMAN	DGAT1	Diacylglycerol O-acyltransferase 1	6652390	6308910	6493270	6973700	6524560	7309760	6891880	6734560	6808810	7122440	5925850	6905550
O75909	CCNK_HUMAN	CCNK	Cyclin-K	9579290	9619250	8489070	8381460	9171100	8236900	9032630	8629580	8711980	8818210	9348110	8748350
O75911	DHRS3_HUMAN	DHRS3	Short-chain dehydrogenase/reductase 3	28026100	29312100	29668400	31460500	25554000	28248400	26071800	26539600	26894800	29677900	27153100	25357600
O75915	PRAF3_HUMAN	ARL6IP5	PRA1 family protein 3	131463000	139243000	128567000	144256000	126724000	139171000	137827000	133466000	121480000	144252000	132401000	140156000
O75923	DYSF_HUMAN	DYSF	Dysferlin	35148200	36351400	35770600	38847200	36271400	38483100	34677000	37073000	34612400	37910000	34897100	36760400
O75925	PIAS1_HUMAN	PIAS1	E3 SUMO-protein ligase PIAS1	3998310	3644590	4350570	4279980	4187810	3729200	3757580	3137520	3406510	3290700	4003680	4118510
O75928	PIAS2_HUMAN	PIAS2	E3 SUMO-protein ligase PIAS2	559593	385425	491658	637335	561522	503294	572285	515446	407078	399758	534459	468914
O75934	SPF27_HUMAN	BCAS2	Pre-mRNA-splicing factor SPF27	13020300	11602800	10879700	11637700	11796300	9585000	12516800	10644700	10761200	9902590	10863600	12591200
O75935	DCTN3_HUMAN	DCTN3	Dynactin subunit 3	100989000	104387000	100918000	98197300	112298000	92856500	93113200	84319600	101216000	83305800	91953700	102904000
O75937	DNJC8_HUMAN	DNAJC8	DnaJ homolog subfamily C member 8	65938500	65259100	71467500	67365000	71667000	67122000	65107700	65571000	67627000	63392300	63588200	64790000
O75940	SPF30_HUMAN	SMNDC1	Survival of motor neuron-related-splicing factor 30	72080200	69647700	73648500	69927000	76606700	72185600	73128600	71367700	70118700	70946800	78632100	68234400
O75943	RAD17_HUMAN	RAD17	Cell cycle checkpoint protein RAD17	219432	2924290	3157120	272884	2965870	1335320	3206450	1298890	3023390	3733950	945819	2835670
O75947	ATP5H_HUMAN	ATP5PD	ATP synthase subunit d, mitochondrial	89727300	88696700	88058000	87675600	85616500	81749600	88350600	77019700	87842100	80003900	87124400	83626200
O75951	LYZL6_HUMAN	LYZL6	Lysozyme-like protein 6						281121
O75953	DNJB5_HUMAN	DNAJB5	DnaJ homolog subfamily B member 5						3293550
O75954	TSN9_HUMAN	TSPAN9	Tetraspanin-9	19964500	22683000	17600400	22699000	16647000	21854100	19522500	23176900	19192400	23896600	20086700	24540100
O75955	FLOT1_HUMAN	FLOT1	Flotillin-1	52369600	53449500	55445600	57474400	56333800	55728200	50060900	52157100	51153100	54309200	47710900	54691000
O75962	TRIO_HUMAN	TRIO	Triple functional domain protein	9565200	10060600	9363180	9998440	9866940	10156400	9336690	10104900	9634460	9964140	9273910	9886010
O75964	ATP5L_HUMAN	ATP5MG	ATP synthase subunit g, mitochondrial	119506000	123514000	127280000	127983000	125680000	125161000	123140000	120858000	123146000	119112000	131080000	123061000
O75970	MPDZ_HUMAN	MPDZ	Multiple PDZ domain protein	9626240	9645590	9314300	9239890	9600670	9038910	9469220	9123920	9391710	9531800	8879350	9753900
O75976	CBPD_HUMAN	CPD	Carboxypeptidase D	19465700	18767500	18348800	19784000	19035800	19476600	18715000	19454200	18903700	20934400	18876400	20065400
O75995	SASH3_HUMAN	SASH3	SAM and SH3 domain-containing protein 3					514150
O76000	OR2B3_HUMAN	OR2B3	Putative olfactory receptor 2B3		504171	488928			407471
O76003	GLRX3_HUMAN	GLRX3	Glutaredoxin-3	118118000	118472000	123661000	111720000	120559000	116582000	115741000	114815000	121306000	109047000	114839000	114488000
O76014	KRT37_HUMAN	KRT37	Keratin, type I cuticular Ha7	636021		1046930	1090750	1147540	1191790	653375	583633	678307	649236
O76021	RL1D1_HUMAN	RSL1D1	Ribosomal L1 domain-containing protein 1	82731500	77314100	71192400	77127400	82403200	76735600	86560600	82609800	83724000	82947500	80728600	77937300
O76024	WFS1_HUMAN	WFS1	Wolframin	16690700	17214500	16822900	17893400	16895900	18105700	16644400	17311400	16556800	17308500	16042600	17352400
O76027	ANXA9_HUMAN	ANXA9	Annexin A9		10242100			7779350
O76031	CLPX_HUMAN	CLPX	ATP-dependent Clp protease ATP-binding subunit clpX-like, mitochondrial	35796000	35078200	40174600	36863400	39012600	36439400	37475600	34720900	37381400	34190300	36879700	34800800
O76036	NCTR1_HUMAN	NCR1	Natural cytotoxicity triggering receptor 1					115410
O76054	S14L2_HUMAN	SEC14L2	SEC14-like protein 2	34013700	37757800	37768000	40381600	36741700	40194500	37124700	41912700	36005500	44567100	37040900	39345500
O76061	STC2_HUMAN	STC2	Stanniocalcin-2	5031900	4538160	7584610	7099520	7968920	7433490	4894390	6066810	5257150	4603300	4856890	4921820
O76062	ERG24_HUMAN	TM7SF2	Delta(14)-sterol reductase TM7SF2	2373210	1993010	2853020	2505750	2461520	2652390	2966180	2333330	2654730	2324300	2000880	2480150
O76070	SYUG_HUMAN	SNCG	Gamma-synuclein						581673		594765	908092		660323
O76071	CIAO1_HUMAN	CIAO1	Probable cytosolic iron-sulfur protein assembly protein CIAO1	34405000	36772800	36402000	36993700	35142200	36728800	38085500	35976100	34791000	36201400	36979100	35668000
O76074	PDE5A_HUMAN	PDE5A	cGMP-specific 3',5'-cyclic phosphodiesterase	43756200	47357500	42689100	48140400	42872300	47104200	42910200	48233200	43503800	48649200	43434600	48532800
O76075	DFFB_HUMAN	DFFB	DNA fragmentation factor subunit beta	8597330	9232110	8871650		9854370				7800690			8505160
O76080	ZFAN5_HUMAN	ZFAND5	AN1-type zinc finger protein 5	5857770	4891350	5761490	4813870	5620010	4553380	5207320	3893500	4923990	4083750	4458590	3292480
O76081	RGS20_HUMAN	RGS20	Regulator of G-protein signaling 20	4794440	4481930	4864410	4857440	4626370	4950050	4819760	4933310	4333770	4807570	4528720	4689470
O76090	BEST1_HUMAN	BEST1	Bestrophin-1	543715	33339700	674041	1746250	26222300	25945600		689246	1014480	29095900	31905500	539361
O76094	SRP72_HUMAN	SRP72	Signal recognition particle subunit SRP72	65171200	68556900	63373700	63868100	63906500	65712300	63370300	64529400	65711300	64731900	63810300	65229100
O76095	JTB_HUMAN	JTB	Protein JTB	15612400	15788200	13041900	12989600	13977900	13005600	14577900	15395800	14934100	13357400	14750900	14193200
O76096	CYTF_HUMAN	CST7	Cystatin-F					345255
O94760	DDAH1_HUMAN	DDAH1	N(G),N(G)-dimethylarginine dimethylaminohydrolase 1	45631500	56704800	48839500	50066200	47709700	52054900	51494400	55400900	58985200	55509300	53803400	57984400
O94762	RECQ5_HUMAN	RECQL5	ATP-dependent DNA helicase Q5	484115	2443600	1958830	2056040	2246400	2395520	386183	609339	2472150	882863	457521	543330
O94763	RMP_HUMAN	URI1	Unconventional prefoldin RPB5 interactor 1	11950800	11295900	12506500	11457200	12371900	12660300	12629500	12582200	12757700	13355300	10870500	12023900
O94766	B3GA3_HUMAN	B3GAT3	Galactosylgalactosylxylosylprotein 3-beta-glucuronosyltransferase 3	12965200	12071500	13366200	14116800	13204100	13367300	13222400	12683600	12520000	12945500	12639500	12860200
O94768	ST17B_HUMAN	STK17B	Serine/threonine-protein kinase 17B	6844400	6881180	7460880	7434800	7548800	7179650	7236580	6857720	6366170	7792200	7071030	7376390
O94772	LY6H_HUMAN	LY6H	Lymphocyte antigen 6H	2219130	2683370	2231700			1509890		1788930				2838560
O94776	MTA2_HUMAN	MTA2	Metastasis-associated protein MTA2	38081000	32907000	40462500	33468800	35973100	35228900	36332900	32887800	32138600	32765000	37598000	31539200
O94778	AQP8_HUMAN	AQP8	Aquaporin-8						365093	245335	222082		305679	294532
O94804	STK10_HUMAN	STK10	Serine/threonine-protein kinase 10	9997570	10474700	8971360	9374380	10205100	9389870	8956090	8889540	8051990	8824840	9051140	8549290
O94806	KPCD3_HUMAN	PRKD3	Serine/threonine-protein kinase D3	2782770	3173250	2920550	3394280	2662340	3259280	2231370	3967920	2957010	2561860	4290500	2609160
O94808	GFPT2_HUMAN	GFPT2	Glutamine--fructose-6-phosphate aminotransferase [isomerizing] 2	11562700	10068600	11906800	9835070	11020200	10414200	10941200	9438440	10956200	9758180	10888800	9827680
O94817	ATG12_HUMAN	ATG12	Ubiquitin-like protein ATG12	9866420	9065740	9938580	10698200	10116800	10394000	11039800	7824830	10585100	9131140	9899080	8419540
O94819	KBTBB_HUMAN	KBTBD11	Kelch repeat and BTB domain-containing protein 11	823203	951517	916484	1043400	937965	952681	774097	929228	858356	1118550	813784	848888
O94822	LTN1_HUMAN	LTN1	E3 ubiquitin-protein ligase listerin	10219300	9399960	10814400	9879680	11144200	10185500	10133000	9746740	10162900	9848470	9596290	9847620
O94826	TOM70_HUMAN	TOMM70	Mitochondrial import receptor subunit TOM70	33792500	33345100	37188600	37290100	36363900	35008800	32571700	32261700	33916200	32766500	34148300	31431200
O94827	PKHG5_HUMAN	PLEKHG5	Pleckstrin homology domain-containing family G member 5	204836	191005	256893	234976	264250	257741	128416	233758	147410	237286	166101	217973
O94829	IPO13_HUMAN	IPO13	Importin-13	5008930	5046920	4649000	5027970	4873980	4853740	5096020	4465760	4805090	5342920	4763860	4778970
O94830	DDHD2_HUMAN	DDHD2	Phospholipase DDHD2	1978700	1906010	2002910	1980970	2125240	2062800	2135510	1999200	1993290	1938100	2086000	2166890
O94842	TOX4_HUMAN	TOX4	TOX high mobility group box family member 4	10414900	9594290	10946700	9805420	10330400	9871590	9730390	9471710	9604910	9340150	10117800	9258130
O94851	MICA2_HUMAN	MICAL2	[F-actin]-monooxygenase MICAL2	12827800	13625900	13370600	14422300	13088100	14887100	12786900	14620900	13108000	13968900	12370900	13696400
O94855	SC24D_HUMAN	SEC24D	Protein transport protein Sec24D	171418000	193313000	188403000	207112000	177858000	205687000	163632000	189989000	169706000	187281000	176114000	181106000
O94864	ST65G_HUMAN	SUPT7L	STAGA complex 65 subunit gamma	1997430	1891280	2271840	1962460	2256480	1791970	1955840	1662930	2260290	1862880	2156070	1762750
O94868	FCSD2_HUMAN	FCHSD2	F-BAR and double SH3 domains protein 2	1423980	1465000	1090100		1084600		1287770	1530630		1298200	1205580	1240050
O94874	UFL1_HUMAN	UFL1	E3 UFM1-protein ligase 1	69129900	68782700	68518100	72174500	68941200	71489200	67933800	67852300	68456500	68141000	66398200	70666700
O94875	SRBS2_HUMAN	SORBS2	Sorbin and SH3 domain-containing protein 2	12670400	12383300	12934700	13049800	12905100	13541000	12892200	12881800	13116300	13992200	11919300	13335300
O94880	PHF14_HUMAN	PHF14	PHD finger protein 14	5668950	5539380	5949090	5730850	5159390	5992060	5640390	5304560	5183660	5576740	5012590	5501480
O94885	SASH1_HUMAN	SASH1	SAM and SH3 domain-containing protein 1	1181820	1031250	1430530	1186730	1550360	1303450	1340020	1240470	1276950	1283650	1286970	1188050
O94886	CSCL1_HUMAN	TMEM63A	CSC1-like protein 1	3789750	3650400	3943530	3821600	4217910	4009450	3832620	4071980	4075130	4204760	3946820	4256130
O94887	FARP2_HUMAN	FARP2	FERM, ARHGEF and pleckstrin domain-containing protein 2	3014210	2906090	3160630	2939760	3144820	3034790	2701910	2854170	2951020	3221080	2951100	3281990
O94888	UBXN7_HUMAN	UBXN7	UBX domain-containing protein 7	14222600	14745100	14360200	15045800	14126300	15101400	13613800	15169300	13342400	13809600	13342400	14487200
O94898	LRIG2_HUMAN	LRIG2	Leucine-rich repeats and immunoglobulin-like domains protein 2	3793240			3837460	4124820	4248030	3105950	2407640		3503800	2319790	3581300
O94901	SUN1_HUMAN	SUN1	SUN domain-containing protein 1	12721900	14227100	13206700	14757400	12421500	14353000	12150100	13515100	12406000	14040000	12480900	13709600
O94903	PLPHP_HUMAN	PLPBP	Pyridoxal phosphate homeostasis protein	33536000	32119300	33780200	30012100	30158800	30384000	29489800	27940600	26834500	33874400	30488300	29609700
O94905	ERLN2_HUMAN	ERLIN2	Erlin-2	121310000	116107000	120796000	117658000	119288000	115115000	125179000	119530000	120567000	119004000	124615000	120111000
O94906	PRP6_HUMAN	PRPF6	Pre-mRNA-processing factor 6	59076800	53421200	47148300	47752900	50862500	41998500	52995700	47344700	42071500	44461000	54174600	36297600
O94907	DKK1_HUMAN	DKK1	Dickkopf-related protein 1	4916590	5355240	4777960	4055870	4951670	4159900	5856790	5382770	5159650	5109400	4190320	4158620
O94913	PCF11_HUMAN	PCF11	Pre-mRNA cleavage complex 2 protein Pcf11	7767110	8158670	9222620	9110400	9131740	8031150	8121350	7724680	8370970	7918320	8717480	7598970
O94915	FRYL_HUMAN	FRYL	Protein furry homolog-like	21595500	20989200	21358200	20806600	22304500	21309300	21002600	21244400	21312100	20158000	20971700	20581300
O94916	NFAT5_HUMAN	NFAT5	Nuclear factor of activated T-cells 5	1533270	4314650	2514820	1889610	1878480	2081310	3894620	3607440	1710990	1716240	1597260	4667330
O94919	ENDD1_HUMAN	ENDOD1	Endonuclease domain-containing 1 protein	29874100	26305400	28594700	28567000	26848600	29994800	30710700	26302300	29841400	33788200	28855100	26768600
O94921	CDK14_HUMAN	CDK14	Cyclin-dependent kinase 14	921160	1104980		1081750	950694	1000800	760339	883722	543802	710262	859127	852842
O94923	GLCE_HUMAN	GLCE	D-glucuronyl C5-epimerase	7666820			7260750	8938320		8256570	6466780	6438670	7741610	5949350	7171630
O94925	GLSK_HUMAN	GLS	Glutaminase kidney isoform, mitochondrial	55475900	53223900	60594200	57033200	62817100	58323300	56731600	54047300	57153500	52734100	58165000	54645100
O94927	HAUS5_HUMAN	HAUS5	HAUS augmin-like complex subunit 5	5055860	3930210	4693490	4045920	5323430	4231910	5047470	4202520	4767370	4051090	4248760	3875780
O94929	ABLM3_HUMAN	ABLIM3	Actin-binding LIM protein 3	26426900	27929200	27061400	27858700	26789500	28226700	26051900	26625700	26256800	25828000	26051500	26179600
O94933	SLIK3_HUMAN	SLITRK3	SLIT and NTRK-like protein 3		410055	113408		948480		141014	1181020	6795430	10894000
O94952	FBX21_HUMAN	FBXO21	F-box only protein 21	1466720	1532810	1449100	1684760	1574490	1915120	1434850	1185390	1401430	1461050	1133490	1315010
O94953	KDM4B_HUMAN	KDM4B	Lysine-specific demethylase 4B	38754600	43700000	40746600	42158800	40167700	40751300	38700200	40668200	36949400	37897300	39323700	35567700
O94955	RHBT3_HUMAN	RHOBTB3	Rho-related BTB domain-containing protein 3	9404960	9259470	10113700	9885860	10761500	7911840	11079000	9398090	7912810	8814840	9187820	8464420
O94964	MTCL2_HUMAN	MTCL2	Microtubule cross-linking factor 2	6019530	5297170	6671950	5483710	6607350	5490580	6027210	5101780	6009610	5152790	5483640	5267020
O94966	UBP19_HUMAN	USP19	Ubiquitin carboxyl-terminal hydrolase 19	11209600	10862100	11591400	11493600	11999000	11978100	10790700	11275400	10733900	10974000	11098900	11062300
O94967	WDR47_HUMAN	WDR47	WD repeat-containing protein 47	21776500	21372900	20803500	21896200	22086900	23132800	21499300	21619400	21688800	22238200	22029500	22741500
O94973	AP2A2_HUMAN	AP2A2	AP-2 complex subunit alpha-2	41528700	43175000	45783400	46646800	45179600	47633000	41432700	42243300	42920800	43055700	40968600	44427700
O94979	SC31A_HUMAN	SEC31A	Protein transport protein Sec31A	204630000	227984000	227484000	256214000	226755000	250675000	198595000	231005000	208555000	221525000	205532000	223435000
O94983	CMTA2_HUMAN	CAMTA2	Calmodulin-binding transcription activator 2	925693	1607390	866603	1551000	4039420	2489330	1413970	852587	1038520	618759	609437	2085720
O94985	CSTN1_HUMAN	CLSTN1	Calsyntenin-1	3298960	3528150	3539490	3662220	4033780	4098810	3187360	3483950	3167360	3159160	3554160	3298930
O94989	ARHGF_HUMAN	ARHGEF15	Rho guanine nucleotide exchange factor 15	9672610	187394	876424	112995	8626690	7309080	1117280	11640200	5560790	7889040	6596040	1029090
O94992	HEXI1_HUMAN	HEXIM1	Protein HEXIM1	87574500	65461000	75442700	73839400	83917600	85807100	73780800	86478800	84265000	80480000	52909400	86392200
O95013;Q6IEY1	O4F21_HUMAN;OR4F3_HUMAN	OR4F21;OR4F29	Olfactory receptor 4F21		498786			593922		462495	666809			504064	635500
O95059	RPP14_HUMAN	RPP14	Ribonuclease P protein subunit p14	753406		875772	733195	934327	827315	824643	708566		665954	824635	559747
O95069	KCNK2_HUMAN	KCNK2	Potassium channel subfamily K member 2		1756660	1111600	1098010			1164830	1473610			1522990
O95070	YIF1A_HUMAN	YIF1A	Protein YIF1A	36902600	39204800	39918600	46010300	40067200	41720700	35664800	39045100	37760000	43590000	37571100	39997900
O95071	UBR5_HUMAN	UBR5	E3 ubiquitin-protein ligase UBR5	10685600	9754140	11134100	9964440	11108500	9827350	10772300	10012500	10873900	9599570	10585000	10043000
O95072	REC8_HUMAN	REC8	Meiotic recombination protein REC8 homolog						332851
O95081	AGFG2_HUMAN	AGFG2	Arf-GAP domain and FG repeat-containing protein 2	3736540	3793840	3873670	3524890	3339610	3721120	3628340	1992510	3589100	3624940	3133030	3574700
O95084	PRS23_HUMAN	PRSS23	Serine protease 23	64652500	76202500	67700900	75696600	71110300	67447600	66600400	70760200	62502300	62692100	57106100	59723000
O95104	SCAF4_HUMAN	SCAF4	SR-related and CTD-associated factor 4	15230200	14034000	15678400	15452800	16445700	15100900	14946000	14941800	15428700	14714300	15926700	14630900
O95136	S1PR2_HUMAN	S1PR2	Sphingosine 1-phosphate receptor 2	1286560	1283770	1385310	1803790	1687550	1696250	1275460	1742960	1426130	1695670	1342680	1470230
O95139	NDUB6_HUMAN	NDUFB6	NADH dehydrogenase [ubiquinone] 1 beta subcomplex subunit 6	38917600	35287400	40819200	36077000	40747900	38999300	40281000	38090900	43085100	37871300	36885700	38875700
O95140	MFN2_HUMAN	MFN2	Mitofusin-2	12600500	12025600	12415200	12092300	12103700	11812600	12523300	11827700	11803700	11795800	11291300	11464400
O95149	SPN1_HUMAN	SNUPN	Snurportin-1	5571450	5561850	5393400	4867690	5164610	4904480	5807330	5482510	5717800	5094280	4954910	5129990
O95155	UBE4B_HUMAN	UBE4B	Ubiquitin conjugation factor E4 B	38613300	41279600	39881600	42816800	37278700	36630400	37675800	40480900	39004400	40352400	39478600	41115000
O95159	ZFPL1_HUMAN	ZFPL1	Zinc finger protein-like 1	15516100	17535600	16413200	18568900	16810900	18179800	16512800	17468500	14636500	16220600	18846300	17494300
O95163	ELP1_HUMAN	ELP1	Elongator complex protein 1	17892100	18852800	18707300	17906300	18526900	17863600	18109900	17336500	18495900	17555200	18593100	17984800
O95166	GBRAP_HUMAN	GABARAP	Gamma-aminobutyric acid receptor-associated protein	7249150		11312900				10192900	9053430		6766120
O95167	NDUA3_HUMAN	NDUFA3	NADH dehydrogenase [ubiquinone] 1 alpha subcomplex subunit 3	7591880	5597780	6567640	6454670	7868330	6250940	8033420	6164270	7675450	6133020	6052610	7188800
O95168	NDUB4_HUMAN	NDUFB4	NADH dehydrogenase [ubiquinone] 1 beta subcomplex subunit 4	33907500	34716100	31266400	31523500	28459500	29081900	32405100	32802600	31994200	31764600	36226200	32118500
O95169	NDUB8_HUMAN	NDUFB8	NADH dehydrogenase [ubiquinone] 1 beta subcomplex subunit 8, mitochondrial	11037500	9215940	9944380	9202120	10606600	9552610	9812210	8912840	11681000	8745840	8906540	9812230
O95170	CDRT1_HUMAN	FBXW10B	F-box and WD repeat domain containing protein 10B	878730		985527	1238310	1317070				1059330	649550
O95178	NDUB2_HUMAN	NDUFB2	NADH dehydrogenase [ubiquinone] 1 beta subcomplex subunit 2, mitochondrial											1784930
O95182	NDUA7_HUMAN	NDUFA7	NADH dehydrogenase [ubiquinone] 1 alpha subcomplex subunit 7	31627500	28914100	33333700	30756300	33467400	32268800	34610400	31670100	35420700	35236900	31167200	31613200
O95183	VAMP5_HUMAN	VAMP5	Vesicle-associated membrane protein 5	30682600	33003500	29588400	29881100	28476600	29045500	26265400	30378700	26394900	28377600	26910100	29697700
O95196	CSPG5_HUMAN	CSPG5	Chondroitin sulfate proteoglycan 5							358964		399218
O95197	RTN3_HUMAN	RTN3	Reticulon-3	189720000	202708000	311215000	280954000	280563000	290278000	198949000	208864000	226166000	219254000	201138000	205689000
O95201	RHIT_HUMAN	ZNF205	Transcriptional repressor RHIT						267417
O95202	LETM1_HUMAN	LETM1	Mitochondrial proton/calcium exchanger protein	57081700	57391100	60917100	56863400	60274700	58327500	59511600	58423800	59039800	57508500	57111600	57647800
O95208	EPN2_HUMAN	EPN2	Epsin-2	5376920	5283790	5027070	5192210	4971120	5069410	5300400	4699110	5016880	5462280	4795860	4905910
O95210	STBD1_HUMAN	STBD1	Starch-binding domain-containing protein 1	14074500	9726780	13863200	13371400	12465400	12775800	13893100	12122100	14758700	13082500	7446840	13003000
O95214	LERL1_HUMAN	LEPROTL1	Leptin receptor overlapping transcript-like 1	8806340	8349960	9366090	9693220	9474710	9079870	8740600	8035660	8862680	8647700	7534300	7939600
O95218	ZRAB2_HUMAN	ZRANB2	Zinc finger Ran-binding domain-containing protein 2	42518900	43366600	42422200	44547000	44279900	45384800	45254600	47258200	43245500	45747600	40428500	45402100
O95219	SNX4_HUMAN	SNX4	Sorting nexin-4	39140500	37607300	38620100	37566100	36845300	35308000	38907100	36097400	37434000	40144300	37846100	39375600
O95222	OR6A2_HUMAN	OR6A2	Olfactory receptor 6A2				2246790
O95232	LC7L3_HUMAN	LUC7L3	Luc7-like protein 3	35494900	33377400	27622200	31005800	33468700	33593700	40002200	33408100	28900500	33408100	27862600	39899500
O95235	KI20A_HUMAN	KIF20A	Kinesin-like protein KIF20A	11970600		19187000		14259500		12692500		15372200		10542900
O95239	KIF4A_HUMAN	KIF4A	Chromosome-associated kinesin KIF4A	15205600	7697900	16197500	7203220	17421700	8045920	15912300	8519830	16548100	6501760	14677400	7333730
O95248	MTMR5_HUMAN	SBF1	Myotubularin-related protein 5	5444250	6028300	5923030	6122610	6059580	5750650	6106440	5826020	5815860	6048330	5684480	5703920
O95249	GOSR1_HUMAN	GOSR1	Golgi SNAP receptor complex member 1	17580600	17857300	17017900	17959000	17370600	16794200	18150300	15879600	17441700	17337700	19230400	16016300
O95251	KAT7_HUMAN	KAT7	Histone acetyltransferase KAT7	5316910	6245150	5569280	4505140	5674920	4683430	6444400	4958510	5409170	5116130	5342360	5185870
O95256	I18RA_HUMAN	IL18RAP	Interleukin-18 receptor accessory protein	519978	1132980		307612		391260	1186200	474543	445425	1041960	608325	442715
O95257	GA45G_HUMAN	GADD45G	Growth arrest and DNA damage-inducible protein GADD45 gamma											298737
O95258	UCP5_HUMAN	SLC25A14	Brain mitochondrial carrier protein 1	578901							1065550				1653510
O95260	ATE1_HUMAN	ATE1	Arginyl-tRNA--protein transferase 1	11856600	10335700	11449100	11421500	12031300	10833700	11583800	11489300	11543300	11206600	10966000	10716800
O95263	PDE8B_HUMAN	PDE8B	High affinity cAMP-specific and IBMX-insensitive 3',5'-cyclic phosphodiesterase 8B		3061270	4011590	5156290		5630180	3596430	3848140	3894200	3360080	3976920	3755860
O95264	5HT3B_HUMAN	HTR3B	5-hydroxytryptamine receptor 3B						14221400					12517600
O95273	CCDB1_HUMAN	CCNDBP1	Cyclin-D1-binding protein 1	6173420	5351460	6229360	6171890	6711160	5678480	5567500	5815370	5496790	5289710	5164500	5249610
O95292	VAPB_HUMAN	VAPB	Vesicle-associated membrane protein-associated protein B/C	70633900	75584500	76344500	78031000	77120200	75314900	70849900	75915500	75360900	73190600	71993100	74086600
O95295	SNAPN_HUMAN	SNAPIN	SNARE-associated protein Snapin	4661360	4549940	4642630	4362740	4680340	4288700	4285720	4224700	4049190	3999700	4472900	4650920
O95297	MPZL1_HUMAN	MPZL1	Myelin protein zero-like protein 1	25243500	27601500	26770100	28200200	27066500	29091500	25199900	27014000	25049200	26268300	26732800	26577700
O95298	NDUC2_HUMAN	NDUFC2	NADH dehydrogenase [ubiquinone] 1 subunit C2	31524900	29251300	30916900	32862400	33936800	34418400	32748700	30457200	29327000	32561800	32445400	29618700
O95299	NDUAA_HUMAN	NDUFA10	NADH dehydrogenase [ubiquinone] 1 alpha subcomplex subunit 10, mitochondrial	160102000	164997000	165197000	174669000	167881000	166512000	166274000	164283000	162173000	164739000	171406000	159309000
O95302	FKBP9_HUMAN	FKBP9	Peptidyl-prolyl cis-trans isomerase FKBP9	233087000	228515000	234681000	246511000	229671000	255227000	235179000	251227000	227936000	260548000	231024000	242677000
O95336	6PGL_HUMAN	PGLS	6-phosphogluconolactonase	47275900	47662600	50289900	48488000	50986700	48285000	48959000	44237300	47957100	44586700	50271900	47787200
O95340	PAPS2_HUMAN	PAPSS2	Bifunctional 3'-phosphoadenosine 5'-phosphosulfate synthase 2	98670800	107177000	103160000	106060000	106042000	107380000	103046000	102502000	98362200	101397000	97546000	106201000
O95343	SIX3_HUMAN	SIX3	Homeobox protein SIX3	7366560	6994640	6733920	6316780	6422760	6165040	7061050	6687620	6532000	6205620	6406470	6496170
O95347	SMC2_HUMAN	SMC2	Structural maintenance of chromosomes protein 2	42876800	37250600	43752700	34208000	45639900	35802300	44156800	37424700	44463700	34169400	44946500	36294400
O95352	ATG7_HUMAN	ATG7	Ubiquitin-like modifier-activating enzyme ATG7	20997400	21492900	20944200	21739400	21410500	21426200	21174100	21375900	20230000	21141600	20461600	20864000
O95359	TACC2_HUMAN	TACC2	Transforming acidic coiled-coil-containing protein 2	12248400	11458200	11911500	10578300	12245000	10861700	12586200	12267000	12138300	11511600	12220500	11405200
O95361	TRI16_HUMAN	TRIM16	Tripartite motif-containing protein 16	20405300	21818100	19973400	21926200	20529300	22400700	21630900	22613800	20728800	22578400	20649800	22361100
O95363	SYFM_HUMAN	FARS2	Phenylalanine--tRNA ligase, mitochondrial	4631200	4871810	4986470	5066890	4793000	4875520	4269370	4228780	4931640	4260660	4868200	4732660
O95365	ZBT7A_HUMAN	ZBTB7A	Zinc finger and BTB domain-containing protein 7A	4878330	4987520	4572410	3705490	4648550	4559500	4421390	4978050	4949730	5736360	5319690	4293700
O95371	OR2C1_HUMAN	OR2C1	Olfactory receptor 2C1						4083750	2080320			8353990		9162610
O95372	LYPA2_HUMAN	LYPLA2	Acyl-protein thioesterase 2	224493000	246672000	267645000	300986000	290457000	261405000	235735000	217886000	214958000	213082000	225635000	225849000
O95373	IPO7_HUMAN	IPO7	Importin-7	126001000	125174000	147914000	136827000	150448000	135977000	134880000	123329000	136882000	123459000	133389000	121546000
O95376	ARI2_HUMAN	ARIH2	E3 ubiquitin-protein ligase ARIH2	8896840	8478540	9320060	7023500	7770170	8200730	7420810	7903200	8091070	7131320	8277230	7641900
O95379	TFIP8_HUMAN	TNFAIP8	Tumor necrosis factor alpha-induced protein 8	18034400	17166900	17186800	18174400	17734200	16570400	17554100	16436100	17008900	16973200	17400500	18650600
O95382	M3K6_HUMAN	MAP3K6	Mitogen-activated protein kinase kinase kinase 6			1506400	1171780	1512380						1405370
O95388	CCN4_HUMAN	CCN4	CCN family member 4		1907320				1914720			2205160
O95389	CCN6_HUMAN	CCN6	Cellular communication network factor 6						515195
O95391	SLU7_HUMAN	SLU7	Pre-mRNA-splicing factor SLU7	4822540	4798790	5503940	4827430	5222010	5281760	4890000	4643120	4924340	4527080	4882960	3937580
O95394	AGM1_HUMAN	PGM3	Phosphoacetylglucosamine mutase	61314500	66013000	61128600	68130900	58173700	69742900	63751600	65650500	63660100	70203300	63917200	68799900
O95396	MOCS3_HUMAN	MOCS3	Adenylyltransferase and sulfurtransferase MOCS3	3957960	3748160	5078820	4233630	3564540	8414980	4199620	3680900	4394680	3479890	3928450	4341580
O95397	PKHA9_HUMAN	PLEKHA8P1	Putative protein PLEKHA9				369991		344378				343767
O95399	UTS2_HUMAN	UTS2	Urotensin-2		392212	284720		294750
O95400	CD2B2_HUMAN	CD2BP2	CD2 antigen cytoplasmic tail-binding protein 2	80501100	57647600	71154000	74374800	88457700	75550200	76109200	65952800	66724500	63649200	75273900	69983000
O95402	MED26_HUMAN	MED26	Mediator of RNA polymerase II transcription subunit 26								12387200			10630200	11913500
O95405	ZFYV9_HUMAN	ZFYVE9	Zinc finger FYVE domain-containing protein 9	1304400	1299160	1318550	1229410	1457910	1337480	1163100	1201360	1211110	1161500	1028990	1318280
O95406	CNIH1_HUMAN	CNIH1	Protein cornichon homolog 1	6434180	6255160	8877420	7093430	6910700	7890260	6063470	4331090	6566800	5446300	9075090	6743830
O95409	ZIC2_HUMAN	ZIC2	Zinc finger protein ZIC 2			1608960	958242	825326	808073	809153	828140	924347		938077
O95415	BRI3_HUMAN	BRI3	Membrane protein BRI3	3298410	2886510	4201420	3847400	3688090	3956530	3295590	2877790	3204210	3071910	3073660	3039930
O95416	SOX14_HUMAN	SOX14	Transcription factor SOX-14						170315			149524		88262.3
O95425	SVIL_HUMAN	SVIL	Supervillin	25177100	23348100	24865500	23860700	23891600	23656700	24264000	23196000	24681800	24003000	24156000	22689200
O95427	PIGN_HUMAN	PIGN	GPI ethanolamine phosphate transferase 1	969276	533849	1081920			155384	1280870	520807	1125120	29046900	31231800	644560
O95428	PPN_HUMAN	PAPLN	Papilin	284206	401577					199591	339336	281883	247432	263202	439120
O95429	BAG4_HUMAN	BAG4	BAG family molecular chaperone regulator 4	6579580	6986930	5699140	6541950	5956150	6002100	6525460	7273550	7151250	6771160	6265580	6087100
O95433	AHSA1_HUMAN	AHSA1	Activator of 90 kDa heat shock protein ATPase homolog 1	85303200	87719400	80894200	80482900	82560200	82215300	82998200	82734600	83869700	84018500	87581500	84413500
O95445	APOM_HUMAN	APOM	Apolipoprotein M	2186760	2612620	3012990	2809980	4839160	2786750	2431140	3198800	3247210	2842130	3041080	3452570
O95452	CXB6_HUMAN	GJB6	Gap junction beta-6 protein					2179040			479868		11762800
O95453	PARN_HUMAN	PARN	Poly(A)-specific ribonuclease PARN	30156100	29438100	30057900	28861900	29153600	28206200	30223100	28737200	31425200	28416500	30992000	28954800
O95456	PSMG1_HUMAN	PSMG1	Proteasome assembly chaperone 1	58887000	55474800	55367300	50434500	54718300	53639500	57092800	52450000	55861200	52366100	57758700	54572100
O95466	FMNL1_HUMAN	FMNL1	Formin-like protein 1	4737720	4962920	5169930	5265570	5126070	5297250	5533920	5259210	4940290	5637260	5625460	5505790
O95470	SGPL1_HUMAN	SGPL1	Sphingosine-1-phosphate lyase 1	43143000	44323300	43925000	45191000	42455800	45006000	41828800	43331200	42129900	42753900	42801200	44942300
O95476	CNEP1_HUMAN	CTDNEP1	CTD nuclear envelope phosphatase 1	6918820	6636920	6371050	6431200	7485240	6578940	6716220	6844640	7267550	7309460	7110130	6579650
O95477	ABCA1_HUMAN	ABCA1	Phospholipid-transporting ATPase ABCA1	7366660	6823170	7929880	6802620	7245490	7430780	7335030	7122150	8053550	6566960	7729480	7000420
O95478	NSA2_HUMAN	NSA2	Ribosome biogenesis protein NSA2 homolog	17760600	17307400	18577700	16617400	18672100	17778100	16896700	16898200	17769900	17961700	16703200	15307400
O95479	G6PE_HUMAN	H6PD	GDH/6PGL endoplasmic bifunctional protein	27119400	30518700	28223300	34949300	27941500	33851800	25559200	30524900	27028200	32915300	26690500	30724600
O95486	SC24A_HUMAN	SEC24A	Protein transport protein Sec24A	26794500	28689200	27730400	29504500	28419000	30387100	27141000	27775100	27150800	28413300	26212500	27169100
O95487	SC24B_HUMAN	SEC24B	Protein transport protein Sec24B	20758200	20584000	22134900	22504000	22090400	23851800	19843900	21142400	21471400	20436600	20391700	21767300
O95500	CLD14_HUMAN	CLDN14	Claudin-14								42099200
O95502	NPTXR_HUMAN	NPTXR	Neuronal pentraxin receptor										311362
O95503	CBX6_HUMAN	CBX6	Chromobox protein homolog 6	4087790	3945350	3759690	4245430	4462620	4619030	3639060	3949380	3900080	3863400	3546690	3453200
O95521	PRAM1_HUMAN	PRAMEF1	PRAME family member 1											70924.4
O95528	GTR10_HUMAN	SLC2A10	Solute carrier family 2, facilitated glucose transporter member 10	714858	714225	637031	1025380	680265	1026590	758651	832164	864312	960696	775952	698835
O95544	NADK_HUMAN	NADK	NAD kinase	1253880	1334770	1613370	1499880	1605490	1676970	1238340	1400440	1464230	1415240	1494030	1381960
O95551	TYDP2_HUMAN	TDP2	Tyrosyl-DNA phosphodiesterase 2	2153900	2043530	2110680	2025820	2255000	1878960	2456350	2061790	2257020	2121330	1930170	1949150
O95561	CA105_HUMAN	C1orf105	Uncharacterized protein C1orf105	280600	207597	227832	189548		193807	257365		240655	237054	279384	251235
O95562	SFT2B_HUMAN	SFT2D2	Vesicle transport protein SFT2B	9646690	8490980	11069000	10192700	11109100	9926650	10876100	8967990	10404300	9610290	10749200	10155900
O95563	MPC2_HUMAN	MPC2	Mitochondrial pyruvate carrier 2	9699760	9266830	9849940	10739500	12224600	10228000	10021300	9614570	9144160	9960820	8861220	9305780
O95568	MET18_HUMAN	METTL18	Histidine protein methyltransferase 1 homolog			104773
O95571	ETHE1_HUMAN	ETHE1	Persulfide dioxygenase ETHE1, mitochondrial	61748500	61284100	71304400	68102000	72804600	68147700	64021600	63828500	67658000	59132200	66669000	62316900
O95573	ACSL3_HUMAN	ACSL3	Fatty acid CoA ligase Acsl3	42737400	45515800	47067500	46253800	46994400	47837700	43269600	44526300	44370300	43859500	44345100	44091700
O95600	KLF8_HUMAN	KLF8	Krueppel-like factor 8	774808
O95602	RPA1_HUMAN	POLR1A	DNA-directed RNA polymerase I subunit RPA1	9759220	9039670	10020100	8755680	10205300	9002860	9740240	8914070	9407210	8511540	9851820	8395270
O95613	PCNT_HUMAN	PCNT	Pericentrin	16757800	18078400	20106400	17600900	21372400	18016700	20000900	15984400	21397100	18007900	14922300	15342800
O95619	YETS4_HUMAN	YEATS4	YEATS domain-containing protein 4	2451710	2294530	1886700	3786040	4281190	2749330	4808060	2795730	1332410	3127700	3193650	3799440
O95625	ZBT11_HUMAN	ZBTB11	Zinc finger and BTB domain-containing protein 11	429852	515398		342988	480369	546208	406186	530568	470260	359315		478182
O95628	CNOT4_HUMAN	CNOT4	CCR4-NOT transcription complex subunit 4	7960740	7448230	7629460	7729050	8111770	8037200	7448410	7782610	8104110	7512880	6759860	6981520
O95630	STABP_HUMAN	STAMBP	STAM-binding protein	16285300	17109400	17911500	17461100	17213900	17423100	16706000	17330800	16477900	16841700	16597700	16911300
O95633	FSTL3_HUMAN	FSTL3	Follistatin-related protein 3	178922	262707	190975	220800	196805	288150	152136	215313	140125	204174		201182
O95639	CPSF4_HUMAN	CPSF4	Cleavage and polyadenylation specificity factor subunit 4	18951500	18036600	18465900	17842100	18160500	16917900	18686600	17917300	17103200	16153300	18782300	17815300
O95670	VATG2_HUMAN	ATP6V1G2	V-type proton ATPase subunit G 2	1122630	1047040	1016450	1245230	1115010	1124230	1109090	1170400	1113710	1030770		1156560
O95671	ASML_HUMAN	ASMTL	Probable bifunctional dTTP/UTP pyrophosphatase/methyltransferase protein	30753300	34028400	30696800	34590000	32369800	34938000	30466400	34087900	27776200	33175500	28518500	33197800
O95674	CDS2_HUMAN	CDS2	Phosphatidate cytidylyltransferase 2	9276250	10836200	13410000	13497000	14754500	12656500	9294760	10295000	8221920	9441770	8346300	7983200
O95677	EYA4_HUMAN	EYA4	Eyes absent homolog 4				493528			123860		451895		573568
O95678	K2C75_HUMAN	KRT75	Keratin, type II cytoskeletal 75				255460
O95684	CEP43_HUMAN	CEP43	Centrosomal protein 43	9688980	8739480	10356100	8839750	10383600	8719280	9695660	8432840	9979360	8890730	9127120	8155920
O95685	PPR3D_HUMAN	PPP1R3D	Protein phosphatase 1 regulatory subunit 3D	1223920	1613140	1279390	1352300	1154740	1504610	1283290	1259460	1516570	1249470	1274670	1335590
O95696	BRD1_HUMAN	BRD1	Bromodomain-containing protein 1	386178		449054	412530		413132	265215	350692	463871		401620
O95704	APBB3_HUMAN	APBB3	Amyloid-beta A4 precursor protein-binding family B member 3		249073	240011
O95707	RPP29_HUMAN	POP4	Ribonuclease P protein subunit p29	42579600	11500400	12181900	10918000	10887700	38362700	9838260	29003400	11826500	10910100	12382700	9884850
O95714	HERC2_HUMAN	HERC2	E3 ubiquitin-protein ligase HERC2	20304100	18271400	21282100	19249600	20790900	19885300	19815500	18024000	20700100	17884800	19134800	16720000
O95721	SNP29_HUMAN	SNAP29	Synaptosomal-associated protein 29	14195800	12701700	13450600	13498700	12678800	13059000	14221300	14946000	13821600	13883400	11121400	12995800
O95747	OXSR1_HUMAN	OXSR1	Serine/threonine-protein kinase OSR1	65903400	66403400	66254700	72346700	65450600	69009100	65925300	69846300	64061200	69124600	62202500	68457900
O95749	GGPPS_HUMAN	GGPS1	Geranylgeranyl pyrophosphate synthase	6371010	7028550	6555550	7189040	6162660	6719520	6298790	6930070	6546140	6868660	7134160	6626180
O95750	FGF19_HUMAN	FGF19	Fibroblast growth factor 19			741983	620421	604997	639842				629674	624287
O95751	LDOC1_HUMAN	LDOC1	Protein LDOC1	183164		307004	298465		273497	192616	229540	295148
O95755	RAB36_HUMAN	RAB36	Ras-related protein Rab-36		638384		618594						658854	554135
O95757	HS74L_HUMAN	HSPA4L	Heat shock 70 kDa protein 4L	26429400	24988300	26490700	24216300	26290800	24389400	25703400	24763000	26451400	23126700	25258300	25054700
O95758	PTBP3_HUMAN	PTBP3	Polypyrimidine tract-binding protein 3	14607100	14764700	13865900	15781500	14510400	15042400	14284100	14811000	14312300	15865800	14290300	15680800
O95772	STR3N_HUMAN	STARD3NL	STARD3 N-terminal-like protein	11139400	11059700	10508200	10575100	9310700	10126500	10779800	10253000		10455200	10050500	10416500
O95777	LSM8_HUMAN	LSM8	U6 snRNA-associated Sm-like protein LSm8	80458400	67694500	74235600	71850000	81045500	73969800	67915500	69472600	63341800	68504800	82555500	76205100
O95782	AP2A1_HUMAN	AP2A1	AP-2 complex subunit alpha-1	179267000	184029000	181965000	195187000	184692000	190452000	174641000	187206000	176778000	184514000	179412000	183082000
O95785	WIZ_HUMAN	WIZ	Protein Wiz	4282310	3915450	5373660	4632570	5001820	4932630	4882270	5710770	7646390	3248150	3969690	4566740
O95786	RIGI_HUMAN	RIGI	Antiviral innate immune response receptor RIG-I	9780010	9646260	9998270	9878080	9749490	10066800	9904360	10213600	9847490	10120700	10054800	9846390
O95793	STAU1_HUMAN	STAU1	Double-stranded RNA-binding protein Staufen homolog 1	37220200	37029700	37521800	37595300	38551500	37088000	37668600	37643000	37978200	36786900	37275900	36434300
O95801	TTC4_HUMAN	TTC4	Tetratricopeptide repeat protein 4	10043600	8685830	10374000	8849230	10518200	8917350	9889200	8793130	10662400	8520670	9968100	9692590
O95807	TM50A_HUMAN	TMEM50A	Transmembrane protein 50A	9931900	11168500	10088400	9609970	10086300	10059000	10067600	9602170	9712310	9573670	10024800	10675200
O95810	CAVN2_HUMAN	CAVIN2	Caveolae-associated protein 2	2114510	1718400	2306630	2500870	2476710	2296010	2475750	2128660	2077740	2134090	1535470	2351240
O95813	CER1_HUMAN	CER1	Cerberus							97206.1	166488				152889
O95816	BAG2_HUMAN	BAG2	BAG family molecular chaperone regulator 2	54904500	55416800	52616900	51609200	55719300	51361600	55650000	50696500	54275300	50504700	55346800	54013400
O95817	BAG3_HUMAN	BAG3	BAG family molecular chaperone regulator 3	55890300	56806300	62423300	63310200	63441300	62396100	56525600	56413100	58449700	57246100	53051100	53541300
O95819	M4K4_HUMAN	MAP4K4	Mitogen-activated protein kinase kinase kinase kinase 4	52968200	49593900	52633900	50344500	53797700	51434900	50531600	48582800	51027800	47402100	49504100	47572100
O95822	DCMC_HUMAN	MLYCD	Malonyl-CoA decarboxylase, mitochondrial	5298150	5313930	5549910	5417480	5832570	5707250	5186430	5697140	5714540	5274310	5408160	5268420
O95825	QORL1_HUMAN	CRYZL1	Quinone oxidoreductase-like protein 1	16097300	16144300	17145800	17435600	17538100	16815500	16339500	17608000	16624500	17652500	16353500	17219600
O95831	AIFM1_HUMAN	AIFM1	Apoptosis-inducing factor 1, mitochondrial	56602800	55979100	58311900	59441800	59694800	58926700	57573900	56171800	57273200	56339500	56054300	55337000
O95832	CLD1_HUMAN	CLDN1	Claudin-1	1981620		1171510	1790070	890724	2320280	2357370	2236340			1721670	1164670
O95833	CLIC3_HUMAN	CLIC3	Chloride intracellular channel protein 3						83309.3	65449.1
O95834	EMAL2_HUMAN	EML2	Echinoderm microtubule-associated protein-like 2	4184820	4540450	4014430	4927210	3982650	4590830	4143820	4618380	4146470	4982480	4255790	4888600
O95835	LATS1_HUMAN	LATS1	Serine/threonine-protein kinase LATS1	1009590	1060530	1294080	1096980	1316570	1080640	1062900	1007520	1102920	945718	1055820	1078800
O95837	GNA14_HUMAN	GNA14	Guanine nucleotide-binding protein subunit alpha-14							4308480
O95838	GLP2R_HUMAN	GLP2R	Glucagon-like peptide 2 receptor								2731810		2714510		2782560
O95843	GUC1C_HUMAN	GUCA1C	Guanylyl cyclase-activating protein 3			1140640
O95857	TSN13_HUMAN	TSPAN13	Tetraspanin-13	4930380	4014400	4883260	4545640	4415500	4361920	5375860	4546500	4754050	4468020	5270580	4551010
O95861	BPNT1_HUMAN	BPNT1	3'(2'),5'-bisphosphate nucleotidase 1	38373200	42203400	40897700	43387800	40973000	42669600	39361000	40955800	39034000	41274100	40628300	40440200
O95863	SNAI1_HUMAN	SNAI1	Zinc finger protein SNAI1											769182
O95864	FADS2_HUMAN	FADS2	Acyl-CoA 6-desaturase	41752600	48318600	49649300	52604000	53789300	58573500	41893900	50362200	42300600	44885800	45390900	48811900
O95865	DDAH2_HUMAN	DDAH2	Putative hydrolase DDAH2	30446500	31064700	33991400	35066000	34849300	36322500	30157700	32594400	30064600	29879400	30183100	30846600
O95870	ABHGA_HUMAN	ABHD16A	Phosphatidylserine lipase ABHD16A	4551230	4308340	4492940	4662750	4658310	4637840	4184760	4222830	4523950	4348530	4057580	4130430
O95873	CF047_HUMAN	C6orf47	Uncharacterized protein C6orf47	3359860	2846210	3730700	3437460	3705930	3758160	3345840	3228140	3458450	2873960	3172060	3467900
O95881	TXD12_HUMAN	TXNDC12	Thioredoxin domain-containing protein 12	74804000	81612800	91387600	94175300	88279500	95168400	69963400	71763800	67924400	72436400	77344300	73406200
O95897	NOE2_HUMAN	OLFM2	Noelin-2	4444120		344572	5647510	306002	360459	514691	5085700	239197	6639480	363682	50391200
O95905	ECD_HUMAN	ECD	Protein ecdysoneless homolog	14680100	14676200	15097800	12557500	15603900	13376300	14988100	13831700	14919200	12833700	15213900	12898100
O95907	MOT3_HUMAN	SLC16A8	Monocarboxylate transporter 3		156863
O95918	OR2H2_HUMAN	OR2H2	Olfactory receptor 2H2	178534					246319
O95926	SYF2_HUMAN	SYF2	Pre-mRNA-splicing factor SYF2		5868510	2860320	3472220					2750710		4492410	5231160
O95931	CBX7_HUMAN	CBX7	Chromobox protein homolog 7									44936
O95936	EOMES_HUMAN	EOMES	Eomesodermin homolog	20941.1
O95947	TBX6_HUMAN	TBX6	T-box transcription factor TBX6			1997430	2212040					1719420	2942800		2465460
O95965	ITGBL_HUMAN	ITGBL1	Integrin beta-like protein 1	901661	1119340	799462	1156090	835427	1037560	952222	1001480	1166640	789505	860138	1167840
O95967	FBLN4_HUMAN	EFEMP2	EGF-containing fibulin-like extracellular matrix protein 2	2686050	3908030	3638940	4258320	2762730	4375750	2206790	3581730	2297920	3095430	2443050	3108180
O95977	S1PR4_HUMAN	S1PR4	Sphingosine 1-phosphate receptor 4				945073
O95980	RECK_HUMAN	RECK	Reversion-inducing cysteine-rich protein with Kazal motifs	1380080	1752800	1527760	1792970	1544740	1731860	1291550	1411360	1349760	1606340	1302890	1665560
O95983	MBD3_HUMAN	MBD3	Methyl-CpG-binding domain protein 3	4069140	4108610	4478300	3705630	4743370	3984320	4626250	3869530	4189760	3647970	4788220	3511210
O95985	TOP3B_HUMAN	TOP3B	DNA topoisomerase 3-beta-1	14526300	16978100	16452800	17442500	16114600	17542600	14835100	15809400	17249400	15674800	16024500	16383900
O95988	TCL1B_HUMAN	TCL1B	T-cell leukemia/lymphoma protein 1B			1170710		973562
O95989	NUDT3_HUMAN	NUDT3	Diphosphoinositol polyphosphate phosphohydrolase 1	28280500	26905000	26828600	30666000	21469900	26185600	24563200	25448300	27610200	22311900	25847200	23470700
O95990	F107A_HUMAN	FAM107A	Actin-associated protein FAM107A	17835200								17758000
O95999	BCL10_HUMAN	BCL10	B-cell lymphoma/leukemia 10	12400500	10291200	11230300	11433200	11988100	11074300	12336600	11629800	11405800	11592900	9943140	12211000
O96000	NDUBA_HUMAN	NDUFB10	NADH dehydrogenase [ubiquinone] 1 beta subcomplex subunit 10	69462100	72367700	72823300	72080200	69582100	68551600	69932400	71049700	69997400	68653300	70552600	67852100
O96002	CX001_HUMAN	CXorf1	Putative transmembrane protein CXorf1		3327090
O96005	CLPT1_HUMAN	CLPTM1	Putative lipid scramblase CLPTM1	48302300	47892000	45164700	42486500	47023900	43459500	49096900	47294500	47255000	47763100	47868300	47187900
O96006	ZBED1_HUMAN	ZBED1	E3 SUMO-protein ligase ZBED1	747612	601214	745813	628383	734814	621191	681626	526738	711676	559381	683063	656064
O96007	MOC2B_HUMAN	MOCS2	Molybdopterin synthase catalytic subunit	10749400	15540400	12796700	12582700	13605400	14088400	16375300	12706800	12622100	11793600	16015800	13777900
O96008	TOM40_HUMAN	TOMM40	Mitochondrial import receptor subunit TOM40 homolog	55065700	51112000	54731800	53091600	54105800	55273800	57999500	48623300	50955500	49489100	57546600	49383200
O96009	NAPSA_HUMAN	NAPSA	Napsin-A					1289030	243472					1037820	136185
O96011	PX11B_HUMAN	PEX11B	Peroxisomal membrane protein 11B	23905700	23427000	25187700	27231700	24537500	26506100	23051000	23416100	24053500	23664900	22963600	23392300
O96013	PAK4_HUMAN	PAK4	Serine/threonine-protein kinase PAK 4	9966420	10221400	10827300	9708360	10096300	10316300	10427200	10497400	10432900	10596900	10638500	9806020
O96015	DNAL4_HUMAN	DNAL4	Dynein axonemal light chain 4	1388900	1536560	1660090	1725800	1267830	1759220	1512460	1550940	1513280	1334940	1364350	1263710
O96017	CHK2_HUMAN	CHEK2	Serine/threonine-protein kinase Chk2	740217	657851	827043	771704	888286	707642	801825	740531	936458	742831	807410	762882
O96018	APBA3_HUMAN	APBA3	Amyloid-beta A4 precursor protein-binding family A member 3	28110400	4590570	22758400	3261280	1098900	23499600	27929200		23775200	2829500	29725300	13742100
O96019	ACL6A_HUMAN	ACTL6A	Actin-like protein 6A	64203000	57983300	61750500	57382800	60493800	57038500	67396600	59158900	59634000	57978700	61790900	58467300
O96024	B3GT4_HUMAN	B3GALT4	Beta-1,3-galactosyltransferase 4			303733	175507				353614		392897
O96028	NSD2_HUMAN	NSD2	Histone-lysine N-methyltransferase NSD2	4778680	3130000	4940600	3063670	5270690	3332450	4707840	3325780	4608210	2810030	4351780	3220980
P00156	CYB_HUMAN	MT-CYB	Cytochrome b	19490100	16678800	22870200	19717000	21048200	20671100	19346200	19306500	19840100	19561600	18291900	18160200
P00167	CYB5_HUMAN	CYB5A	Cytochrome b5	28792400	23545000	28534700	24374700	26687800	22762000	28044900	24216500	28385400	20371600	22467500	23526800
P00325	ADH1B_HUMAN	ADH1B	All-trans-retinol dehydrogenase [NAD(+)] ADH1B	519890						433106			440655
P00338	LDHA_HUMAN	LDHA	L-lactate dehydrogenase A chain	2357330000	2918500000	2502600000	2962240000	2593600000	2941270000	2349160000	2838390000	2387290000	2815060000	2349360000	2869620000
P00367	DHE3_HUMAN	GLUD1	Glutamate dehydrogenase 1, mitochondrial	107530000	109834000	121558000	124717000	119293000	122457000	108656000	110831000	111645000	104967000	112065000	109098000
P00374	DYR_HUMAN	DHFR	Dihydrofolate reductase	404956000	378952000	442900000	404901000	447076000	399237000	413145000	370274000	418444000	378832000	408132000	406609000
P00387	NB5R3_HUMAN	CYB5R3	NADH-cytochrome b5 reductase 3	239854000	266142000	264363000	278491000	257423000	280083000	242632000	256091000	249856000	259873000	254871000	273099000
P00390	GSHR_HUMAN	GSR	Glutathione reductase, mitochondrial	56003900	57216500	58676500	59401600	57777800	59370700	56015500	56712500	55887500	55643800	58229500	56341300
P00395	COX1_HUMAN	MT-CO1	Cytochrome c oxidase subunit 1	21259100	18335600	26710700	28477100	28787800	24173800	21468700	20639600	20885800	21103400	22515000	21199700
P00403	COX2_HUMAN	MT-CO2	Cytochrome c oxidase subunit 2	201776000	191657000	212604000	197142000	205088000	197897000	201090000	192284000	195811000	188730000	187235000	191377000
P00414	COX3_HUMAN	MT-CO3	Cytochrome c oxidase subunit 3	28179400	24856600	30038900	30547200	29873700	25582500	28022700	26489500	29884700	29094500	30416300	29686900
P00441	SODC_HUMAN	SOD1	Superoxide dismutase [Cu-Zn]	618274000	667849000	701882000	763073000	708461000	750704000	628885000	693129000	660064000	722173000	623204000	698590000
P00488	F13A_HUMAN	F13A1	Coagulation factor XIII A chain					2873620		2232330	3101660			2916680
P00491	PNPH_HUMAN	PNP	Purine nucleoside phosphorylase	89436900	91108500	95661200	98763200	95480200	97788100	83283700	90209900	89068700	86238800	85015200	88317800
P00492	HPRT_HUMAN	HPRT1	Hypoxanthine-guanine phosphoribosyltransferase	189234000	201400000	209483000	192650000	212984000	199915000	194578000	190048000	187596000	185772000	207466000	190914000
P00505	AATM_HUMAN	GOT2	Aspartate aminotransferase, mitochondrial	206964000	205397000	239912000	224819000	239217000	222083000	211245000	202390000	215937000	200043000	212072000	206902000
P00519	ABL1_HUMAN	ABL1	Tyrosine-protein kinase ABL1	2300260	2466960	2736170	2898540	2678820	2655390	2229070	2438580	2343120	2203430	2153820	2131950
P00533	EGFR_HUMAN	EGFR	Epidermal growth factor receptor	54384200	52178600	57074100	59817600	57411100	58544400	53036700	53607700	55165700	53588800	52898200	52911800
P00558	PGK1_HUMAN	PGK1	Phosphoglycerate kinase 1	1433780000	1757900000	1701700000	2132320000	1555420000	2006880000	1349360000	1664270000	1367920000	1659000000	1358840000	1607960000
P00568	KAD1_HUMAN	AK1	Adenylate kinase isoenzyme 1	99449500	93854400	101933000	101853000	98368000	101352000	90491600	97120300	93293300	107086000	96530100	100633000
P00734	THRB_HUMAN	F2	Prothrombin	2422360	2716540	2946890	3149510	3723510	2875490	2689380	3300960	3260620	2566240	3089550	2807510
P00742	FA10_HUMAN	F10	Coagulation factor X	5069230						4058600	5364350	4969150	5348220	4799820	4472920
P00746	CFAD_HUMAN	CFD	Complement factor D	629265					2147830
P00748	FA12_HUMAN	F12	Coagulation factor XII	900508			1055590				693166		1883990	1018610	834546
P00749	UROK_HUMAN	PLAU	Urokinase-type plasminogen activator	18822900	20668100	19836400	20775600	22323100	23264300	19343900	20044800	18701600	20109600	20000400	20336600
P00750	TPA_HUMAN	PLAT	Tissue-type plasminogen activator	42316900	38968900	44701500	39089400	44873700	39406500	43183100	38606700	43478400	35352500	48767400	36721700
P00797	RENI_HUMAN	REN	Renin		2864990				2608410		1245180		2109420	1898310
P00813	ADA_HUMAN	ADA	Adenosine deaminase	4117640	4812060	5668820	5667330	4613370	6989660	5255600	5444120	4997020	4675360	8525110	8144150
P00846	ATP6_HUMAN	MT-ATP6	ATP synthase subunit a	58738700	53741300	90933300	89784500	87986400	75801000	55825300	68757100	53852600	57340900	49535000	61026400
P00918	CAH2_HUMAN	CA2	Carbonic anhydrase 2	1695630	1597490
P00973	OAS1_HUMAN	OAS1	2'-5'-oligoadenylate synthase 1												1038580
P01008	ANT3_HUMAN	SERPINC1	Antithrombin-III	42328100	29258100	53262800	37654000	53906300	39339900	42855400	37898200	42459500	34561300	41069100	37045100
P01023	A2MG_HUMAN	A2M	Alpha-2-macroglobulin	1055130000	1022850000	1221950000	1174830000	1095720000	1148750000	1034820000	998201000	1045180000	951698000	996737000	981427000
P01024	CO3_HUMAN	C3	Complement C3	6408100	9717270	10046700	8762700	12193900	9322110	8499900	11448800	11087400	9945700	10265700	9853250
P01033	TIMP1_HUMAN	TIMP1	Metalloproteinase inhibitor 1	9035420	10279400	9033760	10367100	10865600	10960800	6667770	8365400	7079240	8175920	7389720	8267460
P01034	CYTC_HUMAN	CST3	Cystatin-C	19293800	16648000	20543100	21630300	24260400	24573700	18329600	18034600	18119800	18453500	12428800	17813700
P01036	CYTS_HUMAN	CST4	Cystatin-S							1208630
P01040	CYTA_HUMAN	CSTA	Cystatin-A		4442050					1414530	6005550	3242210			1935460
P01111	RASN_HUMAN	NRAS	GTPase NRas	51153600	56566600	50218600	55245400	49244600	53443900	51382100	53694100	53859600	55784000	52744600	54083000
P01112	RASH_HUMAN	HRAS	GTPase HRas	30691500	33901200	36864500	35323800	35573600	36915700	33966500	31650200	35203900	32790700	32151600	34637600
P01116	RASK_HUMAN	KRAS	GTPase KRas	43426100	43181100	47269500	50021500	47547500	50098900	44560600	41616400	42668600	46486800	40110500	45503700
P01130	LDLR_HUMAN	LDLR	Low-density lipoprotein receptor	24673700	29366300	26955400	27482300	29080000	30878000	25921000	29143600	25132200	25912000	25800400	27759700
P01133	EGF_HUMAN	EGF	Pro-epidermal growth factor	926905	230261	420585	124676		355156	326228	1647840	5770360	1231420	1728070	419136
P01137	TGFB1_HUMAN	TGFB1	Transforming growth factor beta-1 proprotein	22756400	27014000	24815600	28805400	25412000	28383800	23987000	27270500	23960400	27974800	23372500	26892800
P01185	NEU2_HUMAN	AVP	Vasopressin-neurophysin 2-copeptin	4846510		4298080			4915870	5208440	4699540		4997030	4471870
P01210	PENK_HUMAN	PENK	Proenkephalin-A				1562670	1907350		1966400				2024410
P01213	PDYN_HUMAN	PDYN	Proenkephalin-B			818288	623415			899353					861788
P01215	GLHA_HUMAN	CGA	Glycoprotein hormones alpha chain									392348
P01225	FSHB_HUMAN	FSHB	Follitropin subunit beta	784961	680050	1186230	925018	819390	1080730	810496	840030	855036	884375	800202	867246
P01229	LSHB_HUMAN	LHB	Lutropin subunit beta											102787
P01236	PRL_HUMAN	PRL	Prolactin				302410			462389
P01241	SOMA_HUMAN	GH1	Somatotropin							296169
P01242	SOM2_HUMAN	GH2	Growth hormone variant										716434
P01270	PTHY_HUMAN	PTH	Parathyroid hormone	1269480	736040						1556110		1679410
P01282	VIP_HUMAN	VIP	VIP peptides			1172950
P01568;P01571	IFN17_HUMAN;IFN21_HUMAN	IFNA17;IFNA21	Interferon alpha-21					77555.4
P01570	IFN14_HUMAN	IFNA14	Interferon alpha-14			115234				80044.2	153169		122971		142272
P01584	IL1B_HUMAN	IL1B	Interleukin-1 beta	3448740		3383280	2679310	3287740		2844690	3020950	2793710	2332980	2968170	2703790
P01593;P01594	KV133_HUMAN;KVD33_HUMAN	IGKV1-33;IGKV1D-33	Immunoglobulin kappa variable 1D-33									531045
P01597;P04432	KV139_HUMAN;KVD39_HUMAN	IGKV1-39;IGKV1D-39	Immunoglobulin kappa variable 1-39	264538
P01602	KV105_HUMAN	IGKV1-5	Immunoglobulin kappa variable 1-5				371952
P01704	LV214_HUMAN	IGLV2-14	Immunoglobulin lambda variable 2-14			236016		152137				93634.2
P01705	LV223_HUMAN	IGLV2-23	Immunoglobulin lambda variable 2-23								229472
P01706	LV211_HUMAN	IGLV2-11	Immunoglobulin lambda variable 2-11							2822280			4077960
P01709	LV208_HUMAN	IGLV2-8	Immunoglobulin lambda variable 2-8	684549			843898		822418		847206
P01730	CD4_HUMAN	CD4	T-cell surface glycoprotein CD4			309600	277367		353920		298885		306030
P01764	HV323_HUMAN	IGHV3-23	Immunoglobulin heavy variable 3-23		267427		324327	364090
P01768;P0DP03	HV330_HUMAN;HVC05_HUMAN	IGHV3-30;IGHV3-30-5	Immunoglobulin heavy variable 3-30		4371220
P01782	HV309_HUMAN	IGHV3-9	Immunoglobulin heavy variable 3-9	1666270									2195480	2101080
P01824	HV439_HUMAN	IGHV4-39	Immunoglobulin heavy variable 4-39	323512		307342		299669	331180	665572	342995	320332	315807
P01833	PIGR_HUMAN	PIGR	Polymeric immunoglobulin receptor		513945		455941					540329	417329
P01848	TRAC_HUMAN	TRAC	T cell receptor alpha chain constant										1722890
P01850	TRBC1_HUMAN	TRBC1	T cell receptor beta constant 1	335439
P01857	IGHG1_HUMAN	IGHG1	Immunoglobulin heavy constant gamma 1	4103750				14153000			5726870		9363070
P01860	IGHG3_HUMAN	IGHG3	Immunoglobulin heavy constant gamma 3					289412
P01871	IGHM_HUMAN	IGHM	Immunoglobulin heavy constant mu		1572680				2081870	1738360	1732530	2546410	1875290	1087020	1643330
P01880	IGHD_HUMAN	IGHD	Immunoglobulin heavy constant delta						179728						155516
P01889	HLAB_HUMAN	HLA-B	HLA class I histocompatibility antigen, B alpha chain	107022000	97392400	104863000	91000200	101767000	88856000	105990000	92985400	100536000	95550200	106056000	85245300
P01903	DRA_HUMAN	HLA-DRA	HLA class II histocompatibility antigen, DR alpha chain								220377
P01920	DQB1_HUMAN	HLA-DQB1	HLA class II histocompatibility antigen, DQ beta 1 chain								619943		474472
P02008	HBAZ_HUMAN	HBZ	Hemoglobin subunit zeta	10079300						9355560
P02042	HBD_HUMAN	HBD	Hemoglobin subunit delta	9854960	10641900	15608900	12652900	20010100	12322900	11054100	12416800	13942500	9230460	11741500	11244200
P02100	HBE_HUMAN	HBE1	Hemoglobin subunit epsilon	19475100	14152800	28090700	17570500	42607800	17506200	24591400	19342200	29288400	15390000	24234600	15557300
P02452	CO1A1_HUMAN	COL1A1	Collagen alpha-1(I) chain	6431730	9380270	6727170	10397800	7289560	10359800	5738410	9075150	6211060	9998240	5813650	8725720
P02458	CO2A1_HUMAN	COL2A1	Collagen alpha-1(II) chain	9654510	11449500	10363500	11954300	10783000	13062900	10464200	12662200	12803600	14282800	15790800	20300200
P02461	CO3A1_HUMAN	COL3A1	Collagen alpha-1(III) chain	3260620	3897470	3976250	4278580	4130920	5028020	4243190	5546670	4853180	5817900	5938490	6420120
P02462	CO4A1_HUMAN	COL4A1	Collagen alpha-1(IV) chain	26461200	50448600	30013200	50218800	30794100	52337800	26746000	43988900	25935100	40278400	29185100	38989100
P02533	K1C14_HUMAN	KRT14	Keratin, type I cytoskeletal 14	7319350	42198900	11594100	6528600	7391200	13067800	14615200	93078800	22524300	16231600	18674400	36038500
P02538	K2C6A_HUMAN	KRT6A	Keratin, type II cytoskeletal 6A	9046420	18175100	6446580	2174120	6200290	7164730	8277190	87948200	27013300	8918720	15458000	14385900
P02545	LMNA_HUMAN	LMNA	Prelamin-A/C	954450000	1020940000	959561000	1045710000	946858000	1022350000	929015000	1011180000	954423000	1016140000	962558000	1012390000
P02647	APOA1_HUMAN	APOA1	Apolipoprotein A-I	34720700	21945600	50578400	18826500	85936700	20436400	38710400	30945800	49200900	26957400	49188400	27236100
P02649	APOE_HUMAN	APOE	Apolipoprotein E	5796510	8042860	6808960	7182720	9344140	8003640	6643110	7096930	6958600	6893360	10227300	9717490
P02656	APOC3_HUMAN	APOC3	Apolipoprotein C-III	1757020	1892670	2820270	2108180	3548060	1876810	2081370	2145110	2525620	1680070	2262420	2172140
P02675	FIBB_HUMAN	FGB	Fibrinogen beta chain	3342830	5354660	4254920	5063260	7577980	6443900	5282410	5613530	5488300	6468360	5007610	6477870
P02679	FIBG_HUMAN	FGG	Fibrinogen gamma chain	1954200	2985640	2860330	2519330	3143350	3269350	2046660	3148510	2447040	2769650	3208870	3594720
P02686	MBP_HUMAN	MBP	Myelin basic protein							3752860	2283530				699506
P02743	SAMP_HUMAN	APCS	Serum amyloid P-component					3336260
P02745	C1QA_HUMAN	C1QA	Complement C1q subcomponent subunit A				374949								267991
P02748	CO9_HUMAN	C9	Complement component C9	9622750	9483140	9512300	8201720	8956190	9916160	9090320	8979120	9028720	9622890	9050190	9847050
P02751	FINC_HUMAN	FN1	Fibronectin	975978000	1355300000	994112000	1503010000	903547000	1345030000	879232000	1188680000	873428000	1272900000	945259000	1150190000
P02765	FETUA_HUMAN	AHSG	Alpha-2-HS-glycoprotein	139941000	311980000	272710000	204790000	317606000	176496000	166435000	335200000	307280000	244442000	238653000	209625000
P02768	ALBU_HUMAN	ALB	Albumin	92602400	325510000	477153000	383464000	581041000	376783000	131469000	440605000	425339000	307671000	292426000	265371000
P02771	FETA_HUMAN	AFP	Alpha-fetoprotein	1976470	8268460	8268770	7218240	11814900	7776470	3244620	13572100	9926700	8211440	7407680	7348770
P02774	VTDB_HUMAN	GC	Vitamin D-binding protein	3472350	8719850	9307840	8085710	13200000	8071800	4213340	14723500	11763500	9821810	9349080	9924000
P02786	TFR1_HUMAN	TFRC	Transferrin receptor protein 1	72797400	83876800	92964700	87243700	83226900	86238600	77439600	87651000	75033200	80675500	80348900	76839400
P02787	TRFE_HUMAN	TF	Serotransferrin	5635210	9420970	17425300	13768800	22880500	15867100	3765290	12012700	17861400	7308710	10083700	5729700
P02788	TRFL_HUMAN	LTF	Lactotransferrin	15708500	31943300	29218100	26512300	39489800	25163700	15847000	38543300	36378100	31086200	28323900	26756400
P02790	HEMO_HUMAN	HPX	Hemopexin	7406120	7683870	12613300	12504500	14671400	15839200	7759160	10264300	12080500	14129000	15350700	16519600
P02792	FRIL_HUMAN	FTL	Ferritin light chain	76380200	66915500	79051600	61694600	78568900	70628100	71693700	60329300	70806700	58341700	71332300	64755000
P02794	FRIH_HUMAN	FTH1	Ferritin heavy chain	158809000	122191000	178812000	131483000	185826000	129130000	152127000	115258000	162874000	107780000	148833000	117846000
P02795	MT2_HUMAN	MT2A	Metallothionein-2	994490000	1245020000	1126800000	1042360000	974755000	955293000	952104000	835506000	916813000	578077000	1056910000	805239000
P02808	STAT_HUMAN	STATH	Statherin				746702						685808
P02810	PRPC_HUMAN	PRH2	Salivary acidic proline-rich phosphoprotein 1/2			382460	368720
P03886	NU1M_HUMAN	MT-ND1	NADH-ubiquinone oxidoreductase chain 1	19907400	17419800	21432600	18765900	18658300	18758500	18599800	15749600	18517000	16946600	19166000	17735200
P03891	NU2M_HUMAN	MT-ND2	NADH-ubiquinone oxidoreductase chain 2	32180500	34147800	33039600	35950400	36785700	35219800	34610700	33044000	35826800	33500800	39734700	39945400
P03897	NU3M_HUMAN	MT-ND3	NADH-ubiquinone oxidoreductase chain 3	2165510	2383300	2077010	2205760	2842860	1756760	2704480	2309310	2070070		2325940	2404680
P03905	NU4M_HUMAN	MT-ND4	NADH-ubiquinone oxidoreductase chain 4	20029600	16699500	18046400	17709800	20765300	18922400	16744600	15759300	17804900	15997100	20486400	18190200
P03915	NU5M_HUMAN	MT-ND5	NADH-ubiquinone oxidoreductase chain 5	19682100	19183100	26643200	26629700	26762800	25472200	21759100	20902900	21837000	20729200	21538200	23697600
P03923	NU6M_HUMAN	MT-ND6	NADH-ubiquinone oxidoreductase chain 6	3457290	3697330	3076650	2940480	2870650	2732520	3128050	3312260	3507790	3255860	3480710	3420760
P03928	ATP8_HUMAN	MT-ATP8	ATP synthase protein 8	351576	240280	374213		340205	418833		339961		320116	273816	329286
P03973	SLPI_HUMAN	SLPI	Antileukoproteinase								625249
P04004	VTNC_HUMAN	VTN	Vitronectin	44956800	48924900	54833500	52094000	67342800	55587500	60504500	55502300	50600800	52478400	57554000	59454500
P04040	CATA_HUMAN	CAT	Catalase	92781100	96499200	97010700	101406000	95097000	100284000	94852000	97571200	95505600	99527700	91355000	96436400
P04049	RAF1_HUMAN	RAF1	RAF proto-oncogene serine/threonine-protein kinase	17677900	16818600	17320000	15774600	15825700	16145500	16087700	16584800	15288800	15287400	17061800	17188300
P04062	GBA1_HUMAN	GBA1	Lysosomal acid glucosylceramidase	89336000	81268800	89688600	93232600	85654800	84905200	90153000	84938500	83106900	82900200	80210900	83183100
P04066	FUCO_HUMAN	FUCA1	Tissue alpha-L-fucosidase	20000300	23292700	19880500	24719900	19452400	24243900	19890000	22896800	19481900	25433000	21246400	24183000
P04075	ALDOA_HUMAN	ALDOA	Fructose-bisphosphate aldolase A	2111440000	2343540000	2723390000	2879500000	2655810000	2774830000	2126900000	2335900000	2155420000	2249860000	2036550000	2257680000
P04080	CYTB_HUMAN	CSTB	Cystatin-B	306531000	308583000	401390000	364318000	397062000	404101000	313567000	312799000	327997000	302812000	315502000	328502000
P04083	ANXA1_HUMAN	ANXA1	Annexin A1	1085990000	1182000000	1294560000	1289700000	1222190000	1246130000	1109860000	1139050000	1095470000	1128140000	1192490000	1177910000
P04090	REL2_HUMAN	RLN2	Prorelaxin H2			1745790		1656030			1662050		1740470
P04114	APOB_HUMAN	APOB	Apolipoprotein B-100	16315300	16331200	18749900	14580800	22875600	17988900	18958500	19079500	21176100	16472000	24251100	23500700
P04150	GCR_HUMAN	NR3C1	Glucocorticoid receptor	27765000	25931500	29458600	26754500	27624900	27180700	27292600	26205100	27211900	25644500	26683700	25820500
P04156	PRIO_HUMAN	PRNP	Major prion protein	28157900	28731200	28310700	26720400	27812000	27073600	27448200	27958000	26643100	28476600	27855000	26583000
P04179	SODM_HUMAN	SOD2	Superoxide dismutase [Mn], mitochondrial	69747500	60189300	77173400	67722800	73455700	64683900	66264600	60181800	69249500	64835900	68349500	56617500
P04181	OAT_HUMAN	OAT	Ornithine aminotransferase, mitochondrial	166080000	165308000	197136000	185201000	193046000	183568000	166676000	159194000	171546000	163915000	169861000	164848000
P04183	KITH_HUMAN	TK1	Thymidine kinase, cytosolic	1942550		2338860		2473980		1927160	1404960	2174280	1307540	1836270
P04216	THY1_HUMAN	THY1	Thy-1 membrane glycoprotein	231595000	281926000	288213000	356746000	298007000	324013000	242057000	258640000	253104000	286224000	250712000	265021000
P04259	K2C6B_HUMAN	KRT6B	Keratin, type II cytoskeletal 6B		2706470	1575020				1098530	10905600	3120020	1110620	1818540	1488960
P04264	K2C1_HUMAN	KRT1	Keratin, type II cytoskeletal 1	194063000	1089050000	221944000	219630000	215301000	460034000	533949000	2158910000	756226000	509952000	619787000	866322000
P04279	SEMG1_HUMAN	SEMG1	Semenogelin-1								181217			80812.6
P04350	TBB4A_HUMAN	TUBB4A	Tubulin beta-4A chain	1188270000	1285810000	1077570000	1221460000	1118310000	1081700000	1047720000	1084130000	1366890000	1015320000	1252970000	1069090000
P04406	G3P_HUMAN	GAPDH	Glyceraldehyde-3-phosphate dehydrogenase	8919500000	12685100000	12159700000	13055700000	11914600000	12820900000	9331920000	10357200000	9033180000	9890980000	12811900000	10733200000
P04424	ARLY_HUMAN	ASL	Argininosuccinate lyase	135035000	144382000	139995000	145130000	137392000	143822000	134687000	139672000	134492000	153631000	138803000	147187000
P04439	HLAA_HUMAN	HLA-A	HLA class I histocompatibility antigen, A alpha chain	177981000	145707000	193798000	181122000	184400000	172168000	177642000	160053000	191452000	156377000	156681000	155725000
P04626	ERBB2_HUMAN	ERBB2	Receptor tyrosine-protein kinase erbB-2	5742730	5280590	5771970	5717370	5679940	5916610	5450480	5184410	5424340	5109230	5269870	5119860
P04628	WNT1_HUMAN	WNT1	Proto-oncogene Wnt-1											4922660
P04632	CPNS1_HUMAN	CAPNS1	Calpain small subunit 1	326456000	332958000	349703000	335768000	352493000	355491000	337720000	310675000	338208000	318095000	349315000	323063000
P04637	P53_HUMAN	TP53	Cellular tumor antigen p53	79066.1
P04732	MT1E_HUMAN	MT1E	Metallothionein-1E	10879500	9645150	10400400	10249800	8688420	8698650	8175160	7922680	10123200	4875710	10078800	7159520
P04792	HSPB1_HUMAN	HSPB1	Heat shock protein beta-1	1241710000	1387690000	1547360000	1624390000	1479620000	1557760000	1295000000	1307820000	1284000000	1343540000	1347330000	1220300000
P04818	TYSY_HUMAN	TYMS	Thymidylate synthase	11486300	4503740	11656000	2804780	13763600	4308710	12189600	4535100	11581200	3160820	10989000	3349240
P04839	CY24B_HUMAN	CYBB	Cytochrome b-245 heavy chain	3363190	2502280			3305980		460668	511192		1968100		479428
P04843	RPN1_HUMAN	RPN1	Dolichyl-diphosphooligosaccharide--protein glycosyltransferase subunit 1	313479000	325414000	332226000	360217000	332916000	353206000	321526000	322781000	316910000	345164000	306375000	323288000
P04844	RPN2_HUMAN	RPN2	Dolichyl-diphosphooligosaccharide--protein glycosyltransferase subunit 2	285819000	300774000	317245000	348402000	311576000	341405000	282678000	294393000	283757000	296729000	281787000	288159000
P04899	GNAI2_HUMAN	GNAI2	Guanine nucleotide-binding protein G(i) subunit alpha-2	235108000	242864000	249053000	287305000	249481000	272230000	222825000	234065000	221523000	236083000	217222000	239991000
P04908;P0C0S8;P20671;Q7L7L0;Q93077;Q96KK5;Q99878;Q9BTM1	H2A1B_HUMAN;H2A1C_HUMAN;H2A1D_HUMAN;H2A1H_HUMAN;H2A1J_HUMAN;H2A1_HUMAN;H2A3_HUMAN;H2AJ_HUMAN	H2AC12;H2AC14;H2AC17;H2AC25;H2AC6;H2AC7;H2AC8;H2AJ	Histone H2A type 1-B/E	2892570000	2471720000	3821170000	3768400000	3692230000	3752200000	2644090000	3175620000	3120270000	2585130000	3099390000	1796120000
P04920	B3A2_HUMAN	SLC4A2	Anion exchange protein 2	5915790	5599460	6212830	6005970	7084210	6060240	5881850	5598920	6086090	5846100	6039710	5827990
P05013	IFNA6_HUMAN	IFNA6	Interferon alpha-6			43918.4		52138.9
P05023	AT1A1_HUMAN	ATP1A1	Sodium/potassium-transporting ATPase subunit alpha-1	198647000	220130000	214540000	232438000	207827000	225403000	198845000	215912000	198226000	214206000	200959000	208654000
P05026	AT1B1_HUMAN	ATP1B1	Sodium/potassium-transporting ATPase subunit beta-1	57072200	68572400	55251000	69226000	58128700	67446200	57254400	68395300	58212300	63634500	57811800	63787400
P05067	A4_HUMAN	APP	Amyloid-beta precursor protein	21044400	23396100	26236300	30836100	28883300	32639000	22503300	24485100	20086600	25240000	25230900	24145400
P05091	ALDH2_HUMAN	ALDH2	Aldehyde dehydrogenase, mitochondrial	28637400	30431200	30656400	31063700	29444800	30589300	29905800	30046300	30827700	31834600	31883600	29883400
P05093	CP17A_HUMAN	CYP17A1	Steroid 17-alpha-hydroxylase/17,20 lyase	2735110	2757840		9578990	1283010	1718290	1316490	1636280		1762090	1103360	1623710
P05106	ITB3_HUMAN	ITGB3	Integrin beta-3	2068220	1901230	1976800	2093150	1999980	2010270	1952760	1993300	1952150	2100490	1970690	1928630
P05108	CP11A_HUMAN	CYP11A1	Cholesterol side-chain cleavage enzyme, mitochondrial												95145.4
P05109	S10A8_HUMAN	S100A8	Protein S100-A8		5234300						12837900			3871550
P05111	INHA_HUMAN	INHA	Inhibin alpha chain	6002700											3647050
P05114	HMGN1_HUMAN	HMGN1	Non-histone chromosomal protein HMG-14	108862000	113871000	96314200	96762600	94674800	99899400	104898000	108225000	102337000	103253000	122805000	102040000
P05120	PAI2_HUMAN	SERPINB2	Plasminogen activator inhibitor 2	183619000	217374000	159039000	187222000	156026000	212773000	170868000	215040000	168060000	218916000	166128000	223911000
P05121	PAI1_HUMAN	SERPINE1	Plasminogen activator inhibitor 1	97028600	126530000	104928000	120127000	110179000	131869000	97112400	119653000	95784000	111961000	99213400	110381000
P05141	ADT2_HUMAN	SLC25A5	ADP/ATP translocase 2	298936000	286645000	325963000	290271000	318981000	287539000	294471000	266516000	292544000	274667000	289003000	267448000
P05155	IC1_HUMAN	SERPING1	Plasma protease C1 inhibitor			1169040	835494	1224650	860208	764844	1058690	1186160	795942
P05161	ISG15_HUMAN	ISG15	Ubiquitin-like protein ISG15	23717000	22755300	26646500	25737700	25957500	25730500	22487200	22583700	22968200	25293300	21860100	23148900
P05165	PCCA_HUMAN	PCCA	Propionyl-CoA carboxylase alpha chain, mitochondrial	10844500	10927200	10438800	10531500	10446700	10724000	10058300	9855840	9974120	10013200	9954340	10415800
P05166	PCCB_HUMAN	PCCB	Propionyl-CoA carboxylase beta chain, mitochondrial	5406970	5345310	5470580	5468450	5579370	6090100	5832630	5547780	5345430	5552560	5143540	5360640
P05177	CP1A2_HUMAN	CYP1A2	Cytochrome P450 1A2	3483130		1821440		2131830
P05198	IF2A_HUMAN	EIF2S1	Eukaryotic translation initiation factor 2 subunit 1	137756000	137855000	143556000	137214000	144187000	139059000	145393000	142546000	147020000	146153000	140937000	142655000
P05204	HMGN2_HUMAN	HMGN2	Non-histone chromosomal protein HMG-17	135446000	144530000	234698000	218119000	245713000	227091000	128942000	178207000	226938000	118601000	162569000	131614000
P05231	IL6_HUMAN	IL6	Interleukin-6		1079480	622592						1092560	839389
P05362	ICAM1_HUMAN	ICAM1	Intercellular adhesion molecule 1	2858290	3671000	2604100	3796960	2435650	3416880	2709270	3379320	2654060	3344920	2761750	3191820
P05386	RLA1_HUMAN	RPLP1	Large ribosomal subunit protein P1	116238000	121381000	141604000	147543000	151474000	141319000	160437000	145417000	148094000	129006000	129620000	131255000
P05387	RLA2_HUMAN	RPLP2	Large ribosomal subunit protein P2	642098000	566492000	799997000	653241000	723656000	692431000	662784000	581530000	612915000	554959000	673317000	613532000
P05388	RLA0_HUMAN	RPLP0	Large ribosomal subunit protein uL10	628596000	648395000	775270000	734503000	701464000	737394000	645260000	586203000	621266000	597639000	653008000	616122000
P05412	JUN_HUMAN	JUN	Transcription factor Jun	5987690	7710870	6842760	7209350	7486560	7467200	5436420	6083420	5313450	6056080	6751380	5897290
P05423	RPC4_HUMAN	POLR3D	DNA-directed RNA polymerase III subunit RPC4	3390060	3341120	3172780	3524910	3310990	3579010	3551030	3346500	3448430	3548780	3163200	3375750
P05455	LA_HUMAN	SSB	Lupus La protein	180728000	207913000	183487000	188397000	186168000	208151000	198817000	199246000	191546000	194847000	203175000	218538000
P05496	AT5G1_HUMAN	ATP5MC1	ATP synthase F(0) complex subunit C1, mitochondrial	45322100	82253200	80224900	78499000	78495400	69534200	43436300	35482800	75205500	41595200	59854400	72565700
P05543	THBG_HUMAN	SERPINA7	Thyroxine-binding globulin	301084	590749	571641	531964	786300	538725	361998	661479	693506	510449	689041	502449
P05549	AP2A_HUMAN	TFAP2A	Transcription factor AP-2-alpha		441770				164916			146848
P05556	ITB1_HUMAN	ITGB1	Integrin beta-1	433520000	511095000	473098000	511902000	479628000	485978000	420915000	448006000	422638000	435995000	468509000	442812000
P05783	K1C18_HUMAN	KRT18	Keratin, type I cytoskeletal 18	886409000	1029420000	941881000	1088800000	946993000	1050140000	868749000	980504000	867887000	994304000	989085000	949421000
P05787	K2C8_HUMAN	KRT8	Keratin, type II cytoskeletal 8	811155000	970120000	813758000	924358000	811250000	876697000	802044000	889217000	802063000	887341000	874354000	891703000
P05937	CALB1_HUMAN	CALB1	Calbindin						3482760
P05981	HEPS_HUMAN	HPN	Serine protease hepsin	2229600				2634690			2665840
P05997	CO5A2_HUMAN	COL5A2	Collagen alpha-2(V) chain	6765800	8544740	7352110	9394740	7043270	9576610	6687160	8183230	6886420	8708570	7250580	7923140
P06126	CD1A_HUMAN	CD1A	T-cell surface glycoprotein CD1a	2531110						3332570
P06127	CD5_HUMAN	CD5	T-cell surface glycoprotein CD5	69467.1							369251
P06132	DCUP_HUMAN	UROD	Uroporphyrinogen decarboxylase	91295500	93244700	88518200	91919700	89017600	90863900	91373300	91809600	89851600	89310100	94505900	92530600
P06213	INSR_HUMAN	INSR	Insulin receptor	258340	264745	208320	257834	259125	288274	218880	223298	216640	241033	204909	256170
P06241	FYN_HUMAN	FYN	Tyrosine-protein kinase Fyn	31300200	32560400	30626600	31314500	29203500	31235200	31318000	31268100	32684100	29769100	33974300	31784900
P06276	CHLE_HUMAN	BCHE	Cholinesterase	1823350	2137830	1701690	1935010	1936170	1961530	1845340	1772380		2385800	1797670	2200210
P06280	AGAL_HUMAN	GLA	Alpha-galactosidase A	14001500	12769500	13135900	13157300	13062400	13379400	13193200	13745000	13426700	12900800	13046500	11995000
P06307	CCKN_HUMAN	CCK	Cholecystokinin					300018						297624
P06331	HV434_HUMAN	IGHV4-34	Immunoglobulin heavy variable 4-34				3447570	3314350	1460430
P06340	DOA_HUMAN	HLA-DOA	HLA class II histocompatibility antigen, DO alpha chain		890519
P06396	GELS_HUMAN	GSN	Gelsolin	95200600	104347000	98669100	107462000	93505100	106034000	89268000	100034000	90948200	105807000	94638900	100925000
P06400	RB_HUMAN	RB1	Retinoblastoma-associated protein	8356440	6970830	9481970	6735800	10139900	7347300	8794970	7356660	9029100	6806490	8675790	6791030
P06401	PRGR_HUMAN	PGR	Progesterone receptor							3948780
P06454	PTMA_HUMAN	PTMA	Prothymosin alpha	619359000	594744000	501781000	457859000	476179000	445567000	597701000	586045000	638202000	536845000	652593000	620318000
P06493	CDK1_HUMAN	CDK1	Cyclin-dependent kinase 1	36668100	24050800	37844300	21216500	39807400	22710700	37883400	23458300	39144900	21678800	37161600	24478100
P06576	ATPB_HUMAN	ATP5F1B	ATP synthase subunit beta, mitochondrial	526387000	552757000	576310000	581185000	571918000	566158000	518762000	535171000	504212000	520365000	574550000	514609000
P06702	S10A9_HUMAN	S100A9	Protein S100-A9	487126	807992	783071	6316830	424180	351374	472338	20332100			151694	75657.6
P06703	S10A6_HUMAN	S100A6	Protein S100-A6	199171000	198532000	256242000	196259000	207807000	145902000	191622000	175912000	231231000	198233000	237544000	210819000
P06730	IF4E_HUMAN	EIF4E	Eukaryotic translation initiation factor 4E	90003600	92495700	109557000	102027000	103371000	102131000	87102800	92131200	88577800	88304600	93381400	91937800
P06732	KCRM_HUMAN	CKM	Creatine kinase M-type	147360	1317670	823465	322016		359140	417904	1239450		1816730	337687
P06733	ENOA_HUMAN	ENO1	Alpha-enolase	4283950000	5429060000	4408900000	5577550000	4378060000	5388730000	4084370000	5089270000	4212390000	5074820000	4980670000	5394060000
P06737	PYGL_HUMAN	PYGL	Glycogen phosphorylase, liver form	22491300	23357500	23008800	23796800	23662700	24237000	22935900	23324600	23155400	23988100	23594800	23493600
P06744	G6PI_HUMAN	GPI	Glucose-6-phosphate isomerase	409174000	483144000	477560000	560232000	450284000	551408000	411131000	450550000	405710000	461054000	424644000	454816000
P06746	DPOLB_HUMAN	POLB	DNA polymerase beta	15535400	17575800	13891900	15288700	14747500	14411900	15226300	18095900	15799900	17142400	14549400	17453700
P06748	NPM_HUMAN	NPM1	Nucleophosmin	2074070000	2487220000	2202260000	2038130000	2183940000	2141890000	2447030000	2285090000	2539000000	2103670000	2340740000	2639440000
P06753	TPM3_HUMAN	TPM3	Tropomyosin alpha-3 chain	423667000	364409000	445350000	434787000	427923000	436469000	404253000	418841000	412210000	427896000	296052000	465410000
P06756	ITAV_HUMAN	ITGAV	Integrin alpha-V	125768000	134582000	124729000	145552000	121069000	140482000	119076000	133905000	120659000	137134000	126064000	131302000
P06858	LIPL_HUMAN	LPL	Lipoprotein lipase								196186
P06865	HEXA_HUMAN	HEXA	Beta-hexosaminidase subunit alpha	57171700	54920000	54391600	58664200	54150700	54239200	55441300	57065800	54015400	59249100	56140700	57108000
P06870	KLK1_HUMAN	KLK1	Kallikrein-1			321180
P07093	GDN_HUMAN	SERPINE2	Glia-derived nexin	38415000	37144100	39662600	38489400	38352800	35824300	38152900	37559500	39499000	37738100	39719000	36887000
P07098	LIPF_HUMAN	LIPF	Gastric triacylglycerol lipase	355395						286288			291794
P07099	HYEP_HUMAN	EPHX1	Epoxide hydrolase 1	74961800	78096900	77058800	84666200	77248200	80076600	73378200	78702400	74929200	81920500	75433200	78481800
P07101	TY3H_HUMAN	TH	Tyrosine 3-monooxygenase				9731690
P07108	ACBP_HUMAN	DBI	Acyl-CoA-binding protein	104294000	98091800	97236100	89584900	109644000	87173500	94687700	70121000	100529000	75942000	85762500	90588900
P07195	LDHB_HUMAN	LDHB	L-lactate dehydrogenase B chain	1211410000	1273900000	1452000000	1448680000	1444620000	1457030000	1189520000	1121000000	1303090000	1186660000	1254770000	1227040000
P07196	NFL_HUMAN	NEFL	Neurofilament light polypeptide	13284900				8103450						1101250	855288
P07199	CENPB_HUMAN	CENPB	Major centromere autoantigen B	11200600	11664100	12316500	11622300	11661200	11012200	11115100	10251300	11467700	10604400	11301100	10310300
P07203	GPX1_HUMAN	GPX1	Glutathione peroxidase 1	19040900	17234400	20513200	20580800	18977800	18941500	19320600	17578900	19976200	18977500	19227400	17046800
P07204	TRBM_HUMAN	THBD	Thrombomodulin	908087	459897	888777		716290	781885			866470	459981	764876
P07205	PGK2_HUMAN	PGK2	Phosphoglycerate kinase 2	242433000	281167000	263471000	308332000	247179000	312990000	277988000	387876000	275372000	358968000	271460000	361102000
P07225	PROS_HUMAN	PROS1	Vitamin K-dependent protein S	1853810	2568170	5749000	2094810	2132010	3924100	1334700	2170160	2158840	2942800	3520150	3318850
P07237	PDIA1_HUMAN	P4HB	Protein disulfide-isomerase	672194000	743540000	640655000	764427000	676454000	733286000	668848000	773311000	720250000	735152000	675650000	729252000
P07305	H10_HUMAN	H1-0	Histone H1.0	5352110			7795540		6414120						8763120
P07311	ACYP1_HUMAN	ACYP1	Acylphosphatase-1	31387800	28796600	28591200	29269400	28598700	28526300	30072300	26584700	29353600	27231700	27156700	25944600
P07315	CRGC_HUMAN	CRYGC	Gamma-crystallin C	142379		175530	149503		142231	102177
P07327	ADH1A_HUMAN	ADH1A	Alcohol dehydrogenase 1A		7380820	11036200
P07339	CATD_HUMAN	CTSD	Cathepsin D	1433230000	1847910000	1553560000	1847240000	1469510000	1786910000	1436350000	1631070000	1398540000	1742300000	1533880000	1655230000
P07355	ANXA2_HUMAN	ANXA2	Annexin A2	3573460000	4824240000	4334160000	4758670000	3877980000	4135630000	3599640000	3755520000	3385120000	3779000000	4350930000	3894780000
P07357	CO8A_HUMAN	C8A	Complement component C8 alpha chain						803246	59471.4
P07358	CO8B_HUMAN	C8B	Complement component C8 beta chain												3634290
P07384	CAN1_HUMAN	CAPN1	Calpain-1 catalytic subunit	305543000	296039000	297011000	322171000	297948000	315522000	294927000	313714000	294676000	322794000	276785000	312526000
P07437	TBB5_HUMAN	TUBB	Tubulin beta chain	2848840000	2903580000	3067430000	2761050000	2922960000	2841470000	2893310000	2781710000	3010580000	2836810000	2952920000	2827690000
P07438	MT1B_HUMAN	MT1B	Metallothionein-1B	411483000	575751000	401948000	235428000	408934000	134584000	228570000	80701400	469134000	127317000	127363000	164777000
P07451	CAH3_HUMAN	CA3	Carbonic anhydrase 3	1156550		775195		1919200					1747130
P07476	INVO_HUMAN	IVL	Involucrin	336703
P07478	TRY2_HUMAN	PRSS2	Trypsin-2		400660
P07498	CASK_HUMAN	CSN3	Kappa-casein				367582		392180
P07550	ADRB2_HUMAN	ADRB2	Beta-2 adrenergic receptor											195115
P07585	PGS2_HUMAN	DCN	Decorin			399350			332741		476512		810996
P07602	SAP_HUMAN	PSAP	Prosaposin	277882000	296154000	309873000	324302000	339917000	333004000	281287000	273391000	294954000	265436000	306397000	283582000
P07686	HEXB_HUMAN	HEXB	Beta-hexosaminidase subunit beta	122493000	131993000	126273000	135758000	124671000	126050000	124271000	124393000	120808000	133732000	127236000	130384000
P07711	CATL1_HUMAN	CTSL	Procathepsin L	60148700	64821100	54068700	61131700	51596300	56512000	61060500	66223600	61793700	60163500	54993500	56713100
P07737	PROF1_HUMAN	PFN1	Profilin-1	3692640000	4015300000	4058100000	3952140000	3687880000	4342560000	3727080000	3639740000	3773640000	3435070000	3625260000	3577590000
P07738	PMGE_HUMAN	BPGM	Bisphosphoglycerate mutase	6551530	5652330	6321520	5838700	6485160	6090740	6616140	5803010	5787510	6248010	5716420	5932060
P07741	APT_HUMAN	APRT	Adenine phosphoribosyltransferase	103075000	101063000	104760000	109121000	109933000	109919000	108090000	108562000	105270000	110721000	104203000	112893000
P07766	CD3E_HUMAN	CD3E	T-cell surface glycoprotein CD3 epsilon chain	918753							1029570		1037850		1007030
P07814	SYEP_HUMAN	EPRS1	Bifunctional glutamate/proline--tRNA ligase	119969000	124423000	127125000	130633000	127324000	131585000	120149000	125545000	120793000	123375000	120011000	125544000
P07858	CATB_HUMAN	CTSB	Cathepsin B	405581000	464318000	455219000	522185000	389865000	412413000	394477000	424901000	404495000	433221000	376079000	386111000
P07864	LDHC_HUMAN	LDHC	L-lactate dehydrogenase C chain	591654	493358		1036630		994667	574132	686556		652889
P07900	HS90A_HUMAN	HSP90AA1	Heat shock protein HSP 90-alpha	2807700000	3039870000	3088670000	3101260000	3015450000	2941360000	2827590000	2715500000	2748690000	2722850000	3114200000	2759650000
P07902	GALT_HUMAN	GALT	Galactose-1-phosphate uridylyltransferase	4600220	4748470	4507830	4641010	4758960	4737280	4364680	4964380	4199640	4893050	4841210	4917280
P07910	HNRPC_HUMAN	HNRNPC	Heterogeneous nuclear ribonucleoproteins C1/C2	719468000	724005000	769699000	750293000	762311000	741147000	710291000	694640000	744301000	690324000	712852000	713407000
P07919	QCR6_HUMAN	UQCRH	Cytochrome b-c1 complex subunit 6, mitochondrial	32193400	34625800	33704600	31839700	36013100	31083400	32142200	26625800	34449800	28995900	33807800	30352000
P07942	LAMB1_HUMAN	LAMB1	Laminin subunit beta-1	54758200	57157600	52565400	60320600	52455200	57254100	53949700	57429600	50629700	58361700	52498900	56756300
P07947	YES_HUMAN	YES1	Tyrosine-protein kinase Yes	10384000	10281100	11035500	11934500	11212100	10604400	10990500	10377800	11114400	11253600	10602200	10928400
P07948	LYN_HUMAN	LYN	Tyrosine-protein kinase Lyn	92422800	93954000	92800900	90940200	97637300	92812900	93634600	87595200	97928400	94636400	94532800	94616600
P07951	TPM2_HUMAN	TPM2	Tropomyosin beta chain	259159000	327270000	277655000	339903000	279020000	338882000	248270000	295443000	264153000	285278000	260687000	279972000
P07954	FUMH_HUMAN	FH	Fumarate hydratase, mitochondrial	94072800	96158100	110377000	98566500	105332000	101404000	95542500	97066000	98908100	97066700	100686000	98647200
P07992	ERCC1_HUMAN	ERCC1	DNA excision repair protein ERCC-1	8418010	6770550	9202450	8499800	9634570	8256920	8119090	8261100	9281880	8332200	5836680	8160220
P07996	TSP1_HUMAN	THBS1	Thrombospondin-1	218670000	332418000	236855000	322705000	209393000	269602000	233920000	346699000	244888000	319510000	214123000	278453000
P08047	SP1_HUMAN	SP1	Transcription factor Sp1	8128970	7877830	7924240	7491890	8066330	7445500	7740270	7847990	7863410	7843600	7966370	7183100
P08069	IGF1R_HUMAN	IGF1R	Insulin-like growth factor 1 receptor	3983280	4535660	4004920	4491720	4084120	4595690	4018680	4763960	4374680	4472630	4274430	4613160
P08123	CO1A2_HUMAN	COL1A2	Collagen alpha-2(I) chain	1470370	2054310	1953670	2411260	1744110	2330260	1839020	2276200	1797910	2390200	2319400	2629270
P08133	ANXA6_HUMAN	ANXA6	Annexin A6	579287000	674846000	670561000	762133000	653313000	727486000	577341000	630691000	573718000	634545000	585553000	620808000
P08134	RHOC_HUMAN	RHOC	Rho-related GTP-binding protein RhoC	6317270	6864140		5731680			18402800	6828920			6149980
P08172	ACM2_HUMAN	CHRM2	Muscarinic acetylcholine receptor M2	2134870
P08174	DAF_HUMAN	CD55	Complement decay-accelerating factor	36121100	44452400	34462300	45291400	34103900	43998700	35674300	45590100	36418500	46147600	34497900	44878800
P08185	CBG_HUMAN	SERPINA6	Corticosteroid-binding globulin				242470						378997
P08195	4F2_HUMAN	SLC3A2	Amino acid transporter heavy chain SLC3A2	86750900	99990900	83621700	103805000	89085800	95763100	91349600	103119000	94741200	105529000	98400900	100713000
P08236	BGLR_HUMAN	GUSB	Beta-glucuronidase	12314300	12414200	12621100	12694500	12240700	12864800	12626700	11802700	12019100	12606100	13127200	12292000
P08237	PFKAM_HUMAN	PFKM	ATP-dependent 6-phosphofructokinase, muscle type	39583000	41376400	44610100	44545300	42883800	45370900	40190900	40487200	38943600	40713800	39476100	40075400
P08238	HS90B_HUMAN	HSP90AB1	Heat shock protein HSP 90-beta	1306350000	1362500000	1626820000	1465130000	1568170000	1484500000	1446980000	1305530000	1457270000	1271850000	1569330000	1328020000
P08240	SRPRA_HUMAN	SRPRA	Signal recognition particle receptor subunit alpha	41695900	45945200	43924600	46699600	43857600	46033200	42035000	43640600	41507600	41269700	41578500	43755200
P08243	ASNS_HUMAN	ASNS	Asparagine synthetase [glutamine-hydrolyzing]	14067900	12050300	15184300	12509900	15597200	12562400	14067600	12374400	13785800	12457400	13983500	12250800
P08247	SYPH_HUMAN	SYP	Synaptophysin	198706
P08253	MMP2_HUMAN	MMP2	72 kDa type IV collagenase	27588700	29420000	27744700	30781000	32951100	35508900	22578200	23917900	22358500	22484300	25013800	24689500
P08294	SODE_HUMAN	SOD3	Extracellular superoxide dismutase [Cu-Zn]	1898600		2596850			1623800			1914190	1789280	1792150	1975050
P08397	HEM3_HUMAN	HMBS	Porphobilinogen deaminase	15896900	13911800	15708700	14120300	15703700	15183700	15603700	14998800	16276500	14885600	17093300	14724600
P08473	NEP_HUMAN	MME	Neprilysin	24696100	21269600	24284300	21698100	24169000	21808700	24201100	20853300	23784600	21321600	23442000	21692400
P08519	APOA_HUMAN	LPA	Apolipoprotein(a)	18042700			515869	118935	440347	720690	874757	825461	865542	4300390
P08559	ODPA_HUMAN	PDHA1	Pyruvate dehydrogenase E1 component subunit alpha, somatic form, mitochondrial	189582000	179885000	195656000	178721000	188880000	191857000	185602000	177019000	191103000	173255000	187899000	178644000
P08572	CO4A2_HUMAN	COL4A2	Collagen alpha-2(IV) chain	54593700	70290600	58365100	84434600	55572200	77762900	52030500	70745700	55199600	73077000	43493300	69941100
P08574	CY1_HUMAN	CYC1	Cytochrome c1, heme protein, mitochondrial	62143500	67366500	71540800	65813900	68916000	69241000	61953400	61005200	63893900	62001000	70285600	64613900
P08579	RU2B_HUMAN	SNRPB2	U2 small nuclear ribonucleoprotein B''	46582900	50996800	50411800	49920800	48958200	48915400	44391900	47597100	48074700	44754200	50446900	46169100
P08581	MET_HUMAN	MET	Hepatocyte growth factor receptor	103661000	103896000	111705000	104315000	107838000	95484200	113448000	104578000	111642000	101114000	111387000	109357000
P08588	ADRB1_HUMAN	ADRB1	Beta-1 adrenergic receptor		209848	114818					175576
P08590	MYL3_HUMAN	MYL3	Myosin light chain 3		345551000		269678000	221651000
P08603	CFAH_HUMAN	CFH	Complement factor H	7933260	10415700	7979860	11590400	8263600	11138800	7243610	10009300	6939850	10161900	7797940	9624320
P08621	RU17_HUMAN	SNRNP70	U1 small nuclear ribonucleoprotein 70 kDa	94508700	93124300	75595400	76258500	84061000	77882900	103561000	97443700	96619900	98650000	86465900	97265000
P08648	ITA5_HUMAN	ITGA5	Integrin alpha-5	95879900	94795500	102219000	98605000	104630000	103042000	99291600	96410100	98297800	95067200	101360000	95787400
P08651	NFIC_HUMAN	NFIC	Nuclear factor 1 C-type	35592300	35469300	35482400	35937500	34238300	34885300	36324700	34041700	35972800	34258600	33907500	34089400
P08670	VIME_HUMAN	VIM	Vimentin	7269380000	8610880000	7880700000	8165780000	7715690000	7701890000	7732180000	7747090000	7314230000	7352850000	9017170000	7666850000
P08697	A2AP_HUMAN	SERPINF2	Alpha-2-antiplasmin	23325600	28084100	24240000	25495900	27140800	26251800	23529700	28687600	26699000	27657100	24004300	27458000
P08708	RS17_HUMAN	RPS17	Small ribosomal subunit protein eS17	403965000	422228000	491331000	476729000	508396000	472697000	420401000	417318000	446644000	399954000	452428000	432557000
P08754	GNAI3_HUMAN	GNAI3	Guanine nucleotide-binding protein G(i) subunit alpha-3	44038700	46469400	42398800	39185400	44268200	39596500	48470100	49605700	61100300	48986700	58601000	53806900
P08758	ANXA5_HUMAN	ANXA5	Annexin A5	1201620000	1195290000	1476880000	1498580000	1337700000	1450220000	1173080000	1224260000	1222100000	1193920000	1147710000	1157830000
P08779	K1C16_HUMAN	KRT16	Keratin, type I cytoskeletal 16	12440200	40886300	15452600	6843030	8634090	15913900	15996700	113736000	27439000	17331300	23494700	34838900
P08833	IBP1_HUMAN	IGFBP1	Insulin-like growth factor-binding protein 1							440890
P08865	RSSA_HUMAN	RPSA	Small ribosomal subunit protein uS2	909090000	905734000	866965000	838290000	815061000	785335000	916124000	917978000	792951000	829479000	935617000	882737000
P08949	NMB_HUMAN	NMB	Neuromedin-B		204096	260388			554742
P08962	CD63_HUMAN	CD63	CD63 antigen	387966000	321615000	367620000	289767000	335066000	307551000	353714000	307519000	373231000	309923000	382218000	342716000
P09001	RM03_HUMAN	MRPL3	Large ribosomal subunit protein uL3m	22563900	20649200	23754700	20455000	23515100	20856400	22830500	21007000	22432400	20353500	22598800	21113800
P09012	SNRPA_HUMAN	SNRPA	U1 small nuclear ribonucleoprotein A	105658000	107310000	113951000	112849000	113852000	110918000	104431000	102701000	105067000	101638000	107611000	104401000
P09038	FGF2_HUMAN	FGF2	Fibroblast growth factor 2	30443200	33937100	28271400	31412600	26861400	32187700	29010600	30727400	28896400	29721600	29491100	32422000
P09104	ENOG_HUMAN	ENO2	Gamma-enolase	245779000	275676000	255945000	286110000	245932000	274365000	243793000	253864000	241021000	251376000	252531000	253810000
P09105	HBAT_HUMAN	HBQ1	Hemoglobin subunit theta-1		5337800
P09110	THIK_HUMAN	ACAA1	3-ketoacyl-CoA thiolase, peroxisomal	27600200	31428300	27669000	29167800	26757400	28844000	28233000	28870200	28394400	29522600	28132200	30515700
P09131	P3_HUMAN	SLC10A3	P3 protein												4193510
P09132	SRP19_HUMAN	SRP19	Signal recognition particle 19 kDa protein	36328700	32417500	37554200	33871000	34810900	34415700	34119600	36789600	33151100	34546900	31627400	36086900
P09211	GSTP1_HUMAN	GSTP1	Glutathione S-transferase P	907615000	884154000	1035280000	992783000	1085810000	948653000	1034410000	1039140000	1005850000	1005460000	935816000	1069340000
P09234	RU1C_HUMAN	SNRPC	U1 small nuclear ribonucleoprotein C	123838000	120603000	124436000	114268000	110204000	112161000	108287000	115556000	113529000	112733000	108987000	116928000
P09341	GROA_HUMAN	CXCL1	Growth-regulated alpha protein			3297510		3170990
P09382	LEG1_HUMAN	LGALS1	Galectin-1	3251260000	3901750000	4913410000	4678630000	4524620000	4622370000	3272380000	3247110000	3283520000	3469470000	3487960000	3412660000
P09417	DHPR_HUMAN	QDPR	Dihydropteridine reductase	37392600	38858800	39829800	38172500	38794900	40616500	37963500	35834100	39596100	37039600	39008200	37164100
P09429	HMGB1_HUMAN	HMGB1	High mobility group protein B1	951178000	992219000	935341000	821297000	936401000	872085000	1024240000	991615000	996535000	992751000	1010520000	994959000
P09455	RET1_HUMAN	RBP1	Retinol-binding protein 1	45517500	48240500	43785200	52161300	41580600	51390700	42704300	49475800	41727300	56413900	39671000	49010800
P09486	SPRC_HUMAN	SPARC	SPARC	101469000	111577000	117770000	140913000	123774000	156166000	89098600	110593000	95166300	116625000	93997500	107370000
P09488	GSTM1_HUMAN	GSTM1	Glutathione S-transferase Mu 1	18786500	18706900	19264600	19827900	17615500	19040300	16702400	17655900	17317600	19041600	16651400	18259100
P09493	TPM1_HUMAN	TPM1	Tropomyosin alpha-1 chain	1094230000	1209000000	1112090000	1293530000	1212600000	1523860000	1076110000	1431810000	1171180000	1504210000	810907000	1432900000
P09496	CLCA_HUMAN	CLTA	Clathrin light chain A	121155000	113665000	106722000	102172000	114147000	104724000	114609000	103802000	116138000	97696600	106288000	112841000
P09497	CLCB_HUMAN	CLTB	Clathrin light chain B	31324200	24473800	29159600	25954700	28989800	23889200	29058500	27426100	29389100	22677800	26405400	28981100
P09525	ANXA4_HUMAN	ANXA4	Annexin A4	131937000	126921000	124416000	118691000	132792000	115425000	136026000	136697000	132601000	128298000	123285000	125257000
P09543	CN37_HUMAN	CNP	2',3'-cyclic-nucleotide 3'-phosphodiesterase	58190000	58045900	60725200	62058100	60381500	60985500	59983500	57974400	57661200	60424600	56208700	57948900
P09565	IG2R_HUMAN	GIG44	Putative insulin-like growth factor 2-associated protein		281989	3367100
P09601	HMOX1_HUMAN	HMOX1	Heme oxygenase 1	19519900	19844200	20539100	17423900	20842700	19751600	19816400	19179100	19247700	17343600	21511500	17803100
P09619	PGFRB_HUMAN	PDGFRB	Platelet-derived growth factor receptor beta	99368100	115514000	104345000	115328000	105801000	118412000	102041000	114511000	101968000	115808000	100733000	117370000
P09622	DLDH_HUMAN	DLD	Dihydrolipoyl dehydrogenase, mitochondrial	74922000	106587000	119253000	124628000	132200000	134173000	80196000	124867000	69003500	94284000	129786000	143995000
P09630	HXC6_HUMAN	HOXC6	Homeobox protein Hox-C6		415985
P09651	ROA1_HUMAN	HNRNPA1	Heterogeneous nuclear ribonucleoprotein A1	370995000	342940000	295998000	303695000	295930000	300551000	322541000	290962000	271992000	343367000	340660000	290852000
P09661	RU2A_HUMAN	SNRPA1	U2 small nuclear ribonucleoprotein A'	52758300	49663100	52075800	51426300	53731000	51501100	50352900	50745000	52277200	50227600	51215200	48902400
P09668	CATH_HUMAN	CTSH	Pro-cathepsin H	11087600	12067500	11652500	12935600	11478300	12666000	10678000	11485700	9799530	11863400	11514900	10468700
P09669	COX6C_HUMAN	COX6C	Cytochrome c oxidase subunit 6C	112970000	118588000	115141000	124939000	125072000	121355000	117536000	122521000	110236000	127384000	118566000	114452000
P09681	GIP_HUMAN	GIP	Gastric inhibitory polypeptide							955476		683733			839573
P09683	SECR_HUMAN	SCT	Secretin			380000					463316
P09874	PARP1_HUMAN	PARP1	Poly [ADP-ribose] polymerase 1	131402000	123348000	138382000	130054000	138427000	128449000	132375000	123324000	133073000	121188000	130059000	124847000
P09884	DPOLA_HUMAN	POLA1	DNA polymerase alpha catalytic subunit	38969600	30706400	43154700	29128500	42686300	32950700	41850200	31950000	44048100	28442600	39303300	30567000
P09913	IFIT2_HUMAN	IFIT2	Interferon-induced protein with tetratricopeptide repeats 2	3438350	3236340	3668490	3366690	3657960	3577480	3499130	3467570	3123680	3489510	3494780	3293690
P09914	IFIT1_HUMAN	IFIT1	Interferon-induced protein with tetratricopeptide repeats 1	13965200	13382100	15323600	13931600	14853900	13801700	14262800	13623300	14240500	14304000	14867100	13469500
P09919	CSF3_HUMAN	CSF3	Granulocyte colony-stimulating factor												6503950
P09936	UCHL1_HUMAN	UCHL1	Ubiquitin carboxyl-terminal hydrolase isozyme L1	1069710000	1176470000	1315580000	1382090000	1255100000	1375990000	1003860000	1113520000	1039650000	1146350000	1091480000	1147900000
P09958	FURIN_HUMAN	FURIN	Furin	4885760	4720350	5372680	4030020	6229970	4695730	5646720	4574370	4506900	5897410	4520540	9580840
P09960	LKHA4_HUMAN	LTA4H	Leukotriene A-4 hydrolase	112244000	98768800	89510600	94687700	81997700	89038300	82020400	127154000	120310000	93262900	92316800	90141300
P09972	ALDOC_HUMAN	ALDOC	Fructose-bisphosphate aldolase C	124029000	114341000	127566000	144957000	127239000	123214000	123010000	122132000	103318000	120663000	95871700	95162400
P0C024	NUDT7_HUMAN	NUDT7	Peroxisomal coenzyme A diphosphatase NUDT7	68925.8
P0C0L4	CO4A_HUMAN	C4A	Complement C4-A	27754200	28794000	33881200	33640900	36027900	32060500	34596100	35687000	34351700	31614100	31917800	32280200
P0C0L5	CO4B_HUMAN	C4B_2	Complement C4-B		209460					219954				270817
P0C0S5;Q71UI9	H2AV_HUMAN;H2AZ_HUMAN	H2AZ1;H2AZ2	Histone H2A.Z	420677000	535456000	587397000	529338000	540690000	455763000	450112000	409311000	385804000	389439000	594066000	422252000
P0C1Z6	TFPT_HUMAN	TFPT	TCF3 fusion partner			197903		222001			888013
P0C2S0	CTXN2_HUMAN	CTXN2	Cortexin-2								302741
P0C2W1	FBSP1_HUMAN	FBXO45	F-box/SPRY domain-containing protein 1	2462250	2811320	2815230	2133390	2158170	2395020	2275400	2620760	2234020	2196180	2363550	2428450
P0C5K6	CT18_HUMAN	VENTXP1	Putative tumor antigen NA88-A								10599700
P0C5K7	CT62_HUMAN	CT62	Cancer/testis antigen 62	2555860	2639350										3088340
P0C617	O5AL1_HUMAN	OR5AL1	Olfactory receptor 5AL1	940558
P0C626	OR5G3_HUMAN	OR5G3	Olfactory receptor 5G3	142646	175227		105477				142923
P0C628	O5AC1_HUMAN	OR5AC1	Olfactory receptor 5AC1						223716
P0C6P0	BCL8_HUMAN	NBEAP1	Putative protein BCL8	772648
P0C7M6	IQCF3_HUMAN	IQCF3	IQ domain-containing protein F3											29014.5
P0C7N4	T191B_HUMAN	TMEM191B	Transmembrane protein 191B				485750
P0C7P0	CISD3_HUMAN	CISD3	CDGSH iron-sulfur domain-containing protein 3, mitochondrial	4832480	5001810	5376810	5677040	5877250	5111400	5589700	4801640	5685800	4949290	5168810	5369680
P0C7Q2	ARMS2_HUMAN	ARMS2	Age-related maculopathy susceptibility protein 2		484318
P0C7Q5	S35G4_HUMAN	SLC35G4	Putative solute carrier family 35 member G4			1083900		2793740			616335	620744		609476
P0C7T2	OR2T7_HUMAN	OR2T7	Olfactory receptor 2T7					14753600	9732550
P0C7T5	ATX1L_HUMAN	ATXN1L	Ataxin-1-like	1042480	761199	845546		915288	888369	1010740	879052			822871	747933
P0C7U0	ELFN1_HUMAN	ELFN1	Protein ELFN1					420853					301058
P0C7U1	ASA2B_HUMAN	ASAH2B	Putative inactive neutral ceramidase B					3488240	3915840
P0C7V7	SC11B_HUMAN	SEC11B	Putative signal peptidase complex catalytic subunit SEC11B	6558390		3117390	4146620			6762130	4114440	3446290
P0C7V9	ME15P_HUMAN	METTL15P1	Putative methyltransferase-like protein 15P1	17533200
P0C7X3	CCYL3_HUMAN	CCNYL3	Putative cyclin-Y-like protein 3	1614990	1752320	1301760		1498260
P0C853	BAAS2_HUMAN	BAALC-AS2	Putative uncharacterized protein BAALC-AS2	1396880	7317690
P0C862;B2RNN3	C1T9A_HUMAN;C1T9B_HUMAN	C1QTNF9;C1QTNF9B	Complement C1q and tumor necrosis factor-related protein 9B							2085310	1906230
P0C870	JMJD7_HUMAN	JMJD7	Bifunctional peptidase and (3S)-lysyl hydroxylase JMJD7	96438.7	134880	97697.4	111942	122950			150406		108489	131147	150517
P0C8F1	PATE4_HUMAN	PATE4	Prostate and testis expressed protein 4	4354450		4346960								3898760	4285850
P0CAP2	GRL1A_HUMAN	POLR2M	DNA-directed RNA polymerase II subunit GRINL1A	1069780	985609	1012300	1080810	1119650	941042	986460	1161720	970983	1053330	992054	993449
P0CAT3	TLXNB_HUMAN	TLX1NB	Putative TLX1 neighbor protein	3054690		2096750					4686840	2433050			2951580
P0CG04	IGLC1_HUMAN	IGLC1	Immunoglobulin lambda constant 1								1938270
P0CG12	DERPC_HUMAN	DERPC	Decreased expression in renal and prostate cancer protein	23688100	20814300	22337500	21958100	20244000	21265800	21786000	19696100	20353600	19326500	21183900	19369500
P0CG13	CTF8_HUMAN	CHTF8	Chromosome transmission fidelity protein 8 homolog	1188670	555119	1399940	1100950	1569690	1279170	1147010	1077820	1571770	1033150	1261630	993566
P0CG30	GSTT2_HUMAN	GSTT2B	Glutathione S-transferase theta-2B	33341800	34287700	35453600	36954000	36172300	36329700	34494000	36212700	36288100	35018900	35044100	35826200
P0CG34;P0CG35;P0DX04	TB15A_HUMAN;TB15B_HUMAN;TB15C_HUMAN	TMSB15A;TMSB15B;TMSB15C	Thymosin beta-15A	2584050		2502240		2320700		3037370	2038390	2977610			1724890
P0CG42	F157B_HUMAN	FAM157B	Putative protein FAM157B	518969							535295
P0CG47;P0CG48	UBB_HUMAN;UBC_HUMAN	UBB;UBC	Polyubiquitin-B		3098580	9454780	10113000	13240000	13703000		5052870	7426140	9331940	15364000	16258200
P0CH98;Q4KMX7	F106A_HUMAN;F106C_HUMAN	FAM106A;FAM106C	Protein FAM106C		166968		139859	111279	124104	111060	124767	138899		117303
P0CJ72	HMN5_HUMAN	MTRNR2L5	Humanin-like 5	597990							130576
P0CJ73	HMN6_HUMAN	MTRNR2L6	Humanin-like 6											6581320
P0CJ74	HMN7_HUMAN	MTRNR2L7	Humanin-like 7	80308.8	69075.1	73227.1		73029	59946	66617.5		59766.4
P0CJ85;P0CJ86;P0CJ87;P0CJ88;P0CJ89;P0CJ90;Q6RFH8;Q9UBX2	DU4L2_HUMAN;DU4L3_HUMAN;DU4L4_HUMAN;DU4L5_HUMAN;DU4L6_HUMAN;DU4L7_HUMAN;DUX4C_HUMAN;DUX4_HUMAN	DUX4;DUX4L2;DUX4L3;DUX4L4;DUX4L5;DUX4L6;DUX4L7;DUX4L9	Double homeobox protein 4-like protein 2												15485600
P0CW00	TSPY8_HUMAN	TSPY8	Testis-specific Y-encoded protein 8	14501000	17458000	17670400	16898200	18977700	15663900	16022700	17113200	16216000	16330400	15184200	16279500
P0CW23	AKAI1_HUMAN	AKAIN1	A-kinase anchor protein inhibitor 1					60373800
P0DI81;P0DI82	TPC2A_HUMAN;TPC2B_HUMAN	TRAPPC2;TRAPPC2B	Trafficking protein particle complex subunit 2	8089190	7476670	8316140	7661340	7641340	8218120	7771950	7488930	7961870	6688180	7488260	7814240
P0DJD0	RGPD1_HUMAN	RGPD1	RANBP2-like and GRIP domain-containing protein 1	390105	402165	443793	369308	429948	308189	466153	525890	361959	416015	335103	563568
P0DKB5	TPBGL_HUMAN	TPBGL	Trophoblast glycoprotein-like									1110390			911760
P0DKB6	MPC1L_HUMAN	MPC1L	Mitochondrial pyruvate carrier 1-like protein					116606
P0DKX4	SIM18_HUMAN	SMIM18	Small integral membrane protein 18									1526510
P0DMC3	ELA_HUMAN	APELA	Apelin receptor early endogenous ligand						80672.5
P0DMM9;P0DMN0	ST1A3_HUMAN;ST1A4_HUMAN	SULT1A3;SULT1A4	Sulfotransferase 1A3	500046	1007840	676986	600690	982390	812055	50706600	418180	2214580	2599050	292576	2227510
P0DMQ5	INAM2_HUMAN	INAFM2	Putative transmembrane protein INAFM2				74290.9					29550.3
P0DMS9	TMIG3_HUMAN	TMIGD3	Transmembrane domain-containing protein TMIGD3						2557580
P0DMU2	OR83P_HUMAN	OR8G3P	Putative olfactory receptor 8G3 pseudogene											399420
P0DMU7;P0DMU8;P0DMV0	CT455_HUMAN;CT456_HUMAN;CT457_HUMAN	CT45A5;CT45A6;CT45A7	Cancer/testis antigen family 45 member A6	134548											112645
P0DMV8;P0DMV9	HS71A_HUMAN;HS71B_HUMAN	HSPA1A;HSPA1B	Heat shock 70 kDa protein 1A	261515000	276682000	316463000	310203000	303334000	323023000	271794000	266440000	272512000	293765000	278150000	276092000
P0DP23;P0DP24;P0DP25	CALM1_HUMAN;CALM2_HUMAN;CALM3_HUMAN	CALM1;CALM2;CALM3	Calmodulin-1	1302580000	1598010000	1355160000	1149650000	1317580000	1023460000	1309870000	1098360000	1302610000	1111660000	1481930000	1193540000
P0DP42	T225B_HUMAN	TMEM225B	Transmembrane protein 225B			28784000	23678800		23733800				27097600
P0DP75	M14OS_HUMAN	MED14OS	Putative uncharacterized protein MED14OS		144823	231388					142607
P0DPA3	SNH28_HUMAN	SNHG28	Putative uncharacterized protein SNHG28								1621830
P0DPB3	SCHI1_HUMAN	SCHIP1	Schwannomin-interacting protein 1	1662070	1962900	1834250	1653400	1752260	1520900	1998120	2058770	1393060	1583960	1851820	1590750
P0DPB6	RPAC2_HUMAN	POLR1D	DNA-directed RNA polymerases I and III subunit RPAC2	10102200	9070800	11013700	9892580	9827270	9964450	10844700	9847910	9915040	9217670	10336200	9840230
P0DPD5	ZN723_HUMAN	ZNF723	Zinc finger protein 723	314422				1077960		928265
P0DPD7	EFMT4_HUMAN	EEF1AKMT4	EEF1A lysine methyltransferase 4	2543000	2267860	2658670		2383490	2719090	2493340	2001270	2113360	2442040	2565200	2134370
P0DPF6	CB27B_HUMAN	CDRT15P3	Putative uncharacterized protein CDRT15P3			453274
P0DPQ3	PR20G_HUMAN	PRR20G	Proline-rich protein 20G		363250	336144	351909		269095
P0DQW0	ZC11C_HUMAN	ZC3H11C	Zinc finger CCCH domain-containing protein 11C				235365	180447		147856					165869
P0DSN6	T2R33_HUMAN	TAS2R33	Putative taste receptor type 2 member 33	2740120		2823080	2559720	2353620	2325980	2809660	2269380		2369930	2829070	2837170
P0DTE4	UD2A1_HUMAN	UGT2A1	UDP-glucuronosyltransferase 2A1	21437	813495	774339	3261350	5509350	3014000	4497550	3225200	3071360	817892	2657100	3382970
P0DTL6	ZTRF1_HUMAN	ZFTRAF1	Zinc finger TRAF-type-containing protein 1	2408540	2450250	3038480	3370440	3367460	3254850	2181040	2366630	2231820	2406350	2076220	2569960
P0DTU4	TRBR2_HUMAN	TRB	T cell receptor beta chain MC.7.G5									315135
P0DTW3	HV384_HUMAN	IGHV1-38-4	Probable non-functional immunoglobulin heavy variable 1-38-4	138138
P10073	ZSC22_HUMAN	ZSCAN22	Zinc finger and SCAN domain-containing protein 22	297455	251660	802661	311350		583432		346361	605891		718108
P10109	ADX_HUMAN	FDX1	Adrenodoxin, mitochondrial	16652400	15606300	17797900	14977200	18510000	15644400	16576200	15976400	17038400	15409900	15299300	14182000
P10114	RAP2A_HUMAN	RAP2A	Ras-related protein Rap-2a	33443700	33877600	37763000	35512300	33358200	35269700	35617300	34167800	33490600	36357900	33163500	34303000
P10124	SRGN_HUMAN	SRGN	Serglycin	1238460	1694880	1207350	1542040	1631870	1685510	894434	807901	971921	957737	1121930	1011010
P10155	RO60_HUMAN	RO60	RNA-binding protein RO60	79286500	81982400	87661800	91273700	84701200	88915600	79958600	83251400	79323100	83968200	77808200	83595000
P10242	MYB_HUMAN	MYB	Transcriptional activator Myb			678611
P10253	LYAG_HUMAN	GAA	Lysosomal alpha-glucosidase	39434200	41416800	35557500	38980400	32679000	40453900	36654300	41299300	38501100	37903700	33862200	37066300
P10276	RARA_HUMAN	RARA	Retinoic acid receptor alpha	2265160	2056930	2033460	1971540	2105630	2205800	4865250	1782250	2313730	2301090	2024580	1844540
P10301	RRAS_HUMAN	RRAS	Ras-related protein R-Ras	94122900	111649000	94076000	114678000	93537200	115174000	88376000	107314000	91413000	111905000	96079400	106625000
P10321	HLAC_HUMAN	HLA-C	HLA class I histocompatibility antigen, C alpha chain	148931000	120365000	139771000	126315000	128088000	121995000	134901000	125252000	135752000	127464000	119120000	126357000
P10398	ARAF_HUMAN	ARAF	Serine/threonine-protein kinase A-Raf	8464890	9019540	8417590	8618560	8867610	9450160	8565550	9089740	8641800	9064310	8729030	9450160
P10412	H14_HUMAN	H1-4	Histone H1.4	2231960000	2032760000	2257300000	2316430000	2159950000	2347180000	2263650000	2154090000	2263000000	2289750000	2273570000	2155560000
P10415	BCL2_HUMAN	BCL2	Apoptosis regulator Bcl-2							90897
P10515	ODP2_HUMAN	DLAT	Dihydrolipoyllysine-residue acetyltransferase component of pyruvate dehydrogenase complex, mitochondrial	36085500	35428900	36848900	35554700	36411800	34573200	35398800	35751000	37387400	34264900	36068500	35964700
P10586	PTPRF_HUMAN	PTPRF	Receptor-type tyrosine-protein phosphatase F	4429580	4106550	4563880	4004060	4939850	4050240	4328850	4092280	4402310	4192770	4544220	3880530
P10588	NR2F6_HUMAN	NR2F6	Nuclear receptor subfamily 2 group F member 6	14597900	15047800	16862600	17355400	17929700	16886500	16417300	16045400	13384700	16674300	15543900	15366600
P10589	COT1_HUMAN	NR2F1	COUP transcription factor 1	13724700	13922400	12935900	14462600	13078800	13575300	14107800	13621900	13544500	12774600	14022400	13207300
P10599	THIO_HUMAN	TXN	Thioredoxin	1211040000	1154950000	1446300000	1511850000	1471380000	1376200000	1052580000	1108160000	1223780000	1174510000	1051610000	1101230000
P10606	COX5B_HUMAN	COX5B	Cytochrome c oxidase subunit 5B, mitochondrial	80524500	77774900	79864000	79951600	87781800	76301700	79527100	68933700	83542400	67124100	73438200	75170700
P10619	PPGB_HUMAN	CTSA	Lysosomal protective protein	143993000	160901000	150570000	175464000	137939000	152982000	140091000	149453000	142582000	150482000	151473000	152213000
P10620	MGST1_HUMAN	MGST1	Microsomal glutathione S-transferase 1	405206000	337112000	601982000	602529000	586372000	532609000	390406000	368527000	393261000	410347000	342026000	382483000
P10636	TAU_HUMAN	MAPT	Microtubule-associated protein tau					470850			607638				540067
P10644	KAP0_HUMAN	PRKAR1A	cAMP-dependent protein kinase type I-alpha regulatory subunit	70485000	67506900	68649900	64682500	71608600	65472700	66685100	65648400	66623100	66243900	68631800	64294600
P10646	TFPI1_HUMAN	TFPI	Tissue factor pathway inhibitor	12765800	13234400	11227000	12316500	12165000	10994800	12628700	14362700	10956300	13227300	9966220	11560900
P10746	HEM4_HUMAN	UROS	Uroporphyrinogen-III synthase	42657800	42297200	44601000	51823200	49845700	43920500	47534100	42677300	43118200	48587100	44428100	42654200
P10768	ESTD_HUMAN	ESD	S-formylglutathione hydrolase	194401000	187846000	217350000	210637000	215839000	219724000	191778000	177688000	180879000	175773000	191581000	173901000
P10809	CH60_HUMAN	HSPD1	60 kDa heat shock protein, mitochondrial	912067000	956694000	1066260000	1012200000	1048910000	963151000	886942000	858273000	905977000	806977000	993092000	826174000
P10915	HPLN1_HUMAN	HAPLN1	Hyaluronan and proteoglycan link protein 1	591089	803983	668946	570245	611152	1583980	558469	564662	546658	639319	508539
P10997	IAPP_HUMAN	IAPP	Islet amyloid polypeptide	413156	110695	114017	548306		178872	104788	388700		111674	90091.4	395200
P11021	BIP_HUMAN	HSPA5	Endoplasmic reticulum chaperone BiP	1769940000	2114850000	2003800000	2257710000	1867300000	2322660000	1797790000	2143160000	1856060000	2103810000	1828410000	2045810000
P11047	LAMC1_HUMAN	LAMC1	Laminin subunit gamma-1	46498500	52290200	44553900	53948700	43139800	50944100	45408700	51117100	44849300	51389500	45060500	50840300
P11086	PNMT_HUMAN	PNMT	Phenylethanolamine N-methyltransferase										781628
P11117	PPAL_HUMAN	ACP2	Lysosomal acid phosphatase	35292200	35313500	36693500	38986700	34642700	37994300	33483400	36535000	33834300	36190600	34315900	36788300
P11137	MTAP2_HUMAN	MAP2	Microtubule-associated protein 2	11191700	12057600	11804300	11926100	12243600	12673100	11372900	11869000	11365700	12148800	11201300	12346600
P11142	HSP7C_HUMAN	HSPA8	Heat shock cognate 71 kDa protein	1623550000	1710750000	1864750000	1804690000	1816570000	1731450000	1591080000	1550150000	1568740000	1496200000	1675560000	1552420000
P11161	EGR2_HUMAN	EGR2	E3 SUMO-protein ligase EGR2										26951600		20042500
P11166	GTR1_HUMAN	SLC2A1	Solute carrier family 2, facilitated glucose transporter member 1	499655000	593182000	601180000	627584000	644382000	644574000	533768000	603531000	576640000	614721000	566447000	599392000
P11169	GTR3_HUMAN	SLC2A3	Solute carrier family 2, facilitated glucose transporter member 3	125060000	143864000	126174000	148181000	120786000	146609000	130105000	140932000	118383000	152713000	130350000	150426000
P11171	EPB41_HUMAN	EPB41	Protein 4.1	6907580	7497880	7240980	8048710	6828270	7704160	6899140	7322360	7564650	8135390	7251430	7610600
P11172	UMPS_HUMAN	UMPS	Uridine 5'-monophosphate synthase	39217700	35501200	39647200	37233200	38513900	36380400	38683500	36280100	38651200	36839700	36342400	36201500
P11177	ODPB_HUMAN	PDHB	Pyruvate dehydrogenase E1 component subunit beta, mitochondrial	94522900	89577200	70464600	71378700	70257000	62351900	76598600	73692400	67740800	71323000	73366900	68263700
P11182	ODB2_HUMAN	DBT	Lipoamide acyltransferase component of branched-chain alpha-keto acid dehydrogenase complex, mitochondrial	21600300	19674100	17707300	15585400	17335000	17106600	16319900	17592800	19984300	19237500	17178600	20457800
P11216	PYGB_HUMAN	PYGB	Glycogen phosphorylase, brain form	185254000	184976000	199088000	197053000	191844000	191679000	182554000	180577000	192224000	179732000	188857000	181081000
P11230	ACHB_HUMAN	CHRNB1	Acetylcholine receptor subunit beta									344311
P11233	RALA_HUMAN	RALA	Ras-related protein Ral-A	69730200	72358500	72648600	77384600	66802600	69248700	66718500	64619200	66881800	69754300	67445300	68332900
P11234	RALB_HUMAN	RALB	Ras-related protein Ral-B	35520100	38016700	38018800	42269000	39101400	40909100	36210300	37182400	35699500	39511000	38207800	36848000
P11245	ARY2_HUMAN	NAT2	Arylamine N-acetyltransferase 2			131217						154730
P11274	BCR_HUMAN	BCR	Breakpoint cluster region protein	26555700	27273700	26056700	26832300	27464400	27760200	25923200	27865600	26749600	28586000	26278700	27642000
P11279	LAMP1_HUMAN	LAMP1	Lysosome-associated membrane glycoprotein 1	319985000	338710000	326683000	346411000	301088000	305444000	296495000	306793000	290767000	283764000	312165000	284942000
P11308	ERG_HUMAN	ERG	Transcriptional regulator ERG						1242770
P11309	PIM1_HUMAN	PIM1	Serine/threonine-protein kinase pim-1			1657680		1752170	2053600			1829080	2100680		1809370
P11310	ACADM_HUMAN	ACADM	Medium-chain specific acyl-CoA dehydrogenase, mitochondrial	29481000	28575300	29002600	30942200	30188200	28997000	28789700	29324900	31937200	30499600	29493300	29786500
P11387	TOP1_HUMAN	TOP1	DNA topoisomerase 1	62062000	58734500	65793900	59190300	63709800	59110700	63012800	55517700	66432300	53700600	62086500	55499000
P11388	TOP2A_HUMAN	TOP2A	DNA topoisomerase 2-alpha	7394970	4689400	7351160	3304800	7441860	4093460	7473910	4461430	7426430	4030720	7396960	4267290
P11413	G6PD_HUMAN	G6PD	Glucose-6-phosphate 1-dehydrogenase	290606000	326748000	322545000	369664000	311282000	347717000	289017000	309951000	286610000	324757000	292420000	308912000
P11441	UBL4A_HUMAN	UBL4A	Ubiquitin-like protein 4A	16438700	15584700	17433400	17321200	16940200	16101200	15564900	15071700	16676200	15608400	16752900	16487700
P11498	PYC_HUMAN	PC	Pyruvate carboxylase, mitochondrial	7077470	8799430	6986130	8994290	7158080	8688140	7223280	8735110	6553100	8767060	7486830	8962030
P11532	DMD_HUMAN	DMD	Dystrophin	35778500	37387700	38153500	40855900	39040200	41717000	34731200	39739900	37851100	39592600	33319400	37516500
P11586	C1TC_HUMAN	MTHFD1	C-1-tetrahydrofolate synthase, cytoplasmic	137509000	136654000	149995000	139976000	152333000	141524000	138863000	134529000	143018000	132501000	140730000	134853000
P11678	PERE_HUMAN	EPX	Eosinophil peroxidase		15514900	13425100	15400700	3395580		16088600	15455900	2941460	3493280	2493260	16206500
P11684	UTER_HUMAN	SCGB1A1	Uteroglobin		561936
P11717	MPRI_HUMAN	IGF2R	Cation-independent mannose-6-phosphate receptor	68052700	73679800	69216200	76088700	68722600	75228400	67412900	73555500	68270800	74673600	68579700	73596800
P11766	ADHX_HUMAN	ADH5	Alcohol dehydrogenase class-3	230425000	235406000	253184000	256648000	251594000	256919000	227967000	239629000	229521000	244509000	232220000	235005000
P11802	CDK4_HUMAN	CDK4	Cyclin-dependent kinase 4	15789400	15096200	17906900	16144000	18445500	16341900	16903200	15383600	15908400	14799400	15999100	15141600
P11908	PRPS2_HUMAN	PRPS2	Ribose-phosphate pyrophosphokinase 2	26909400	24596000	26642700	25453000	28620100	25394800	26807100	25658300	28924300	25483500	23970800	27693400
P11912	CD79A_HUMAN	CD79A	B-cell antigen receptor complex-associated protein alpha chain	268610			5359440	2827540		293524
P11940	PABP1_HUMAN	PABPC1	Polyadenylate-binding protein 1	230031000	238126000	289566000	282717000	294111000	276573000	233044000	221168000	240856000	221629000	248457000	221957000
P12004	PCNA_HUMAN	PCNA	Proliferating cell nuclear antigen	221641000	198860000	241121000	194423000	225068000	187839000	207636000	174574000	215030000	158941000	204431000	174856000
P12034	FGF5_HUMAN	FGF5	Fibroblast growth factor 5											2801500
P12035	K2C3_HUMAN	KRT3	Keratin, type II cytoskeletal 3	3242060	7417190	2965240		1845400	3122410	2717680	28098600	9685640	3208240	5059300	4233300
P12074	CX6A1_HUMAN	COX6A1	Cytochrome c oxidase subunit 6A1, mitochondrial				2024440	1877350	1771990				892879	803744
P12081	HARS1_HUMAN	HARS1	Histidine--tRNA ligase, cytoplasmic	379140000	388974000	405899000	372565000	399308000	385264000	422945000	386678000	398645000	421258000	352417000	414174000
P12235	ADT1_HUMAN	SLC25A4	ADP/ATP translocase 1	46079400	44896100	50004500	51456900	47557100	47860700	49657800	48265300	47213300	49953300	49725200	45626100
P12236	ADT3_HUMAN	SLC25A6	ADP/ATP translocase 3	612970000	629833000	693949000	657812000	684273000	647325000	619140000	599657000	619205000	573957000	603920000	586087000
P12259	FA5_HUMAN	F5	Coagulation factor V	667976	775513	624866		813804		605842	846428			736900
P12268	IMDH2_HUMAN	IMPDH2	Inosine-5'-monophosphate dehydrogenase 2	146212000	156998000	157350000	154906000	171305000	137516000	152625000	138159000	150557000	129731000	170316000	143244000
P12270	TPR_HUMAN	TPR	Nucleoprotein TPR	48537400	48163300	49238700	48605200	48850300	47674500	48572400	48743900	48964900	47516100	47507200	47892900
P12314	FCGR1_HUMAN	FCGR1A	High affinity immunoglobulin gamma Fc receptor I			234561				172847
P12429	ANXA3_HUMAN	ANXA3	Annexin A3	22569500	24279500	23223100	24716800	23946700	24335000	22853600	24914400	23341100	25384500	21886100	25070000
P12525	MYCP1_HUMAN	MYCLP1	Putative myc-like protein MYCLP1			431868	363785	1552670	410821		350272				1979770
P12544	GRAA_HUMAN	GZMA	Granzyme A		361845						473557
P12644	BMP4_HUMAN	BMP4	Bone morphogenetic protein 4	204650	198913	201862	133805	210762	222869	120227	223778	146651	186886	187233	142559
P12694	ODBA_HUMAN	BCKDHA	2-oxoisovalerate dehydrogenase subunit alpha, mitochondrial	12846700	13543300	13272500	14305000	12785800	14040500	11953000	12250600	13097400	12427100	13534600	14077400
P12724	ECP_HUMAN	RNASE3	Eosinophil cationic protein						294120
P12814	ACTN1_HUMAN	ACTN1	Alpha-actinin-1	726966000	809048000	847441000	881580000	828502000	861863000	715801000	762641000	742741000	770185000	763412000	768748000
P12821	ACE_HUMAN	ACE	Angiotensin-converting enzyme	6316300	5826980	7273200	7092930	7056240	5628130	6178570	5067190	6679490	3218830	5985410	7104210
P12931	SRC_HUMAN	SRC	Proto-oncogene tyrosine-protein kinase Src	52801600	56820400	59942900	61381800	57962000	59330400	54337700	56102000	53974100	56358200	52526400	54395100
P12955	PEPD_HUMAN	PEPD	Xaa-Pro dipeptidase	34543300	35181800	32885000	34167900	32148700	32544600	35499400	36975800	33265200	35346600	34857900	33323800
P12956	XRCC6_HUMAN	XRCC6	X-ray repair cross-complementing protein 6	289755000	284751000	313703000	327926000	301917000	305289000	313420000	282102000	324826000	336466000	333871000	308581000
P13010	XRCC5_HUMAN	XRCC5	X-ray repair cross-complementing protein 5	294766000	300498000	324153000	310852000	312542000	288724000	290234000	278385000	288639000	273986000	317264000	285343000
P13051	UNG_HUMAN	UNG	Uracil-DNA glycosylase		2716150			3112090		2881260		3464640		3695480	3343660
P13056	NR2C1_HUMAN	NR2C1	Nuclear receptor subfamily 2 group C member 1	603953	549582	825474	728668	756085	684142	618589	434497	547519	580797	445596	499063
P13073	COX41_HUMAN	COX4I1	Cytochrome c oxidase subunit 4 isoform 1, mitochondrial	243244000	223655000	256149000	250770000	251154000	239691000	245711000	231066000	232845000	241291000	241554000	232345000
P13196	HEM1_HUMAN	ALAS1	5-aminolevulinate synthase, non-specific, mitochondrial	2264350		543039	4274720	82768.7	2120110	604160			323506		1897370
P13284	GILT_HUMAN	IFI30	Gamma-interferon-inducible lysosomal thiol reductase		152352	129212			73750.3	124421					73745.3
P13473	LAMP2_HUMAN	LAMP2	Lysosome-associated membrane glycoprotein 2	369453000	357978000	450677000	476493000	458222000	469586000	384961000	407136000	406070000	373694000	378981000	372513000
[truncated: 8,367 more rows]

## Sheet: Proteome after imputation
Control_1	Control_2	LLOMe30m_1	LLOMe30m_2	Log2FC	-Log Student's T-test p-value Control_LLOMe30m	Genes
25.5609	25.5898	25.4862	25.5135	-0.0755119	1.20155	NUDT4B
20.2989	20.3321	20.343	17.4798	-1.40413	0.366397	IGLV2-33
20.7634	20.1946	20.9243	17.4495	-1.2921	0.268111	IGKV2D-29
23.3239	23.6757	21.5865	23.5165	-0.94831	0.360846	TRAJ23
19.3133	18.6819	19.6435	18.6141	0.131233	0.071551	IGKV2-40;IGKV2D-40
18.4759	18.5125	19.8508	18.2721	0.567293	0.261966	TRBV15
21.1143	21.2477	21.3321	21.0088	-0.0105295	0.018878	SMIM26
17.9183	17.3111	20.3893	17.5199	1.33987	0.339767	IGKV2D-26
15.728	15.5323	19.9077	19.3119	3.97969	2.21104	TRAV16
25.2607	25.2714	25.2926	25.3342	0.0473385	0.801514	GATD3;GATD3B
18.9832	18.6109	18.4975	16.6454	-1.22563	0.489545	TRBV30
32.3436	32.1724	32.9153	33.2478	0.823578	1.31966	H2BK1
21.1143	25.2021	20.895	21.2707	-2.0753	0.378406	IFT56
25.4138	25.433	25.4234	25.4138	-0.00479317	0.155152	UBA6
24.8858	24.8904	24.8717	24.9406	0.0180578	0.185214	ESYT2
21.0088	20.6886	21.3101	20.8423	0.227489	0.295483	MED19
21.265	21.3376	21.4526	21.4825	0.166268	1.28883	BLTP3B
23.8385	23.9495	23.867	23.9495	0.0142851	0.0677996	SHTN1
19.8057	19.7176	20.2764	20.2185	0.48579	1.93691	TMEM223
23.184	23.1946	23.2434	23.1596	0.012167	0.0967719	ARHGAP10
24.6153	24.6431	24.7594	24.7389	0.119992	1.69751	ILVBL
21.3538	21.3376	21.3592	21.2125	-0.0598316	0.298845	PLEKHG3
24.5345	24.4676	24.632	24.4862	0.0580463	0.264012	SH3PXD2B
18.3218	18.4874	18.4869	18.1625	-0.0799093	0.152648	CIBAR1
18.7506	17.1957	18.7236	17.3725	0.0749092	0.022899	FRMD3
24.0609	24.1095	24.0443	24.1253	-0.000364304	0.00237319	NBAS
18.8285	18.7485	20.8651	23.4676	3.37786	0.913802	FAM234B
20.417	20.9601	20.4273	20.0821	-0.433871	0.50874	TYW5
18.0824	18.0468	17.5944	18.2069	-0.163949	0.189423	MYBPHL
20.8576	20.7876	21.0292	20.9672	0.175622	1.19293	DENND3
24.2821	24.275	24.3712	24.2821	0.0481071	0.404022	VWA8
23.2434	23.1063	23.3511	23.1946	0.0980263	0.351175	SBNO1
23.1871	23.0156	23.3101	23.2463	0.176822	0.714668	GTPBP10
22.239	22.4526	22.3831	22.3936	0.0425577	0.137199	WDR91
19.4876	18.4292	19.0796	19.1525	0.157681	0.100011	BLACE
20.3857	20.8651	20.6186	19.9978	-0.31725	0.297993	MBLAC1
17.6819	17.8295	18.3579	17.946	0.396201	0.674012	VPS37C
23.0625	22.9189	23.1111	23.0772	0.103468	0.528964	PEDS1
21.2535	21.3266	19.0912	21.3805	-1.05423	0.342498	TRAPPC13
26.2317	26.2353	26.275	26.2317	0.0198135	0.33919	CNOT1
25.4676	25.452	25.8044	25.7945	0.339651	3.13062	MAP1LC3B2
18.7787	19.1301	21.502	19.2762	1.43471	0.480344	VWA3A
18.0517	18.6838	18.5429	18.8551	0.331255	0.350123	TEKTIP1
22.5846	22.48	20.7715	19.1704	-2.56136	1.06708	KRT87P
18.5803	18.6106	19.0823	18.8806	0.386063	1.1992	FAM83G
26.7517	26.8504	26.8385	26.9088	0.0725641	0.45117	PGP
23.632	23.7389	23.6649	23.654	-0.0259876	0.169783	RIMOC1
18.7245	18.724	19.2078	19.1847	0.471974	3.22224	RCCD1
18.3499	18.2787	19.1648	18.4351	0.485629	0.499786	TMEM247
20.0426	19.9459	20.0156	19.9742	0.000659943	0.00387087	ZNF316
21.3376	21.5356	21.502	21.8764	0.252628	0.449468	TCAF2
20.2302	19.0046	18.3303	18.124	-1.39022	0.81041	DCAF8L1
30.8755	30.8157	31.196	31.1361	0.320431	1.76968	TUBAL3
23.7182	23.5983	23.7389	23.6096	0.016037	0.0592861	SMCHD1
21.343	21.0886	21.265	21.2877	0.0605488	0.166144	CASTOR2
22.7119	22.7451	22.8014	22.7935	0.0689964	1.25087	UNC119B
17.1067	16.8823	17.5411	17.8702	0.711184	1.15319	WTIP
27.0609	27.1214	26.8858	26.8858	-0.205358	1.67686	RAP1BL
21.4067	21.3484	21.4874	21.2593	-0.00421047	0.0111211	METTL15
20.5638	20.3538	20.68	20.4576	0.110014	0.262287	CCDC85C
21.7553	21.8689	21.8113	21.7876	-0.0127001	0.0720918	SAC3D1
16.7714	15.8964	18.5204	17.8772	1.86488	1.12312	DRGX
20.1332	20.1704	20.1364	20.4536	0.143204	0.333055	C15orf61
24.2679	24.239	24.2679	24.2607	0.010848	0.266445	ZSWIM8
23.4298	23.3778	23.4551	23.3101	-0.0212173	0.0921279	POM121C
22.9933	23.2679	22.9225	23.0088	-0.164931	0.431446	WASHC1
19.46	19.3428	19.2969	19.4195	-0.0431852	0.179598	HIGD1C
18.0877	18.1985	18.1077	18.2876	0.0545959	0.182561	FAM171A2
27.4551	27.6663	27.4314	27.5014	-0.094285	0.31347	SNRPGP15
24.0772	24.0691	24.3031	24.239	0.197903	1.5908	WASH4P
25.8288	25.824	25.9248	25.8858	0.0788927	1.24513	NUDT19
20.8034	20.4775	20.7955	20.6186	0.0665941	0.122733	EVPLL
18.7907	18.7141	18.7622	18.8194	0.0383644	0.295643	GOLGA6L6
22.4972	22.7776	22.5846	22.6051	-0.0424862	0.101821	MIF4GD
20.1946	20.5915	20.0691	20.4676	-0.124701	0.154393	HACD1
21.9707	22.0592	20.274	19.6047	-2.07562	1.59448	IBA57-DT
21.5117	21.4526	21.3752	21.6186	0.0147352	0.0375807	MYO9A
22.265	22.1111	22.3538	22.1642	0.0709791	0.207753	GPR89A;GPR89B
16.8973	16.5373	18.7065	18.7632	2.01755	2.09363	LOC728743
20.6096	20.5638	19.947	20.4576	-0.384398	0.564683	HOXB-AS3
24.3844	24.3031	24.2535	24.2243	-0.104855	0.866834	WASH2P;WASH3P
17.9965	22.5285	20.9459	20.85	0.635462	0.0939155	AJM1
19.5043	19.4218	19.6032	19.3687	0.0229073	0.0601054	UMAD1
25.275	25.2679	25.1908	25.2096	-0.0712175	1.71689	MCRIP1
17.3118	17.2044	18.3686	17.938	0.895195	1.24945	ZNF878
22.0559	22.3239	20.0559	20.7763	-1.77377	1.35771	TMEM232
28.5278	28.55	28.632	28.5389	0.0465975	0.363582	NACA
24.4298	24.3101	24.5105	24.417	0.0938025	0.465616	C11orf98
26.2909	26.2625	26.604	26.1681	0.109345	0.176323	CROCC2
18.2488	18.3855	19.1548	18.5211	0.520781	0.603141	CLDN34
22.7876	22.6843	22.8113	22.7816	0.0604839	0.423531	ASDURF
24.654	24.7182	24.5926	24.6595	-0.0600376	0.489002	DNASE2
26.2625	26.1908	26.3153	26.2445	0.0531988	0.396171	AGPS
19.4605	19.2659	19.6655	19.4573	0.198218	0.52474	UBXN8
24.0275	24.0105	24.0609	23.9672	-0.0049839	0.0333166	KIF2A
22.68	22.7512	22.6276	22.6971	-0.0532999	0.402008	TK2
25.6403	25.5522	25.7871	25.5898	0.0921888	0.315705	DDX39A
27.341	27.7064	27.3494	27.5898	-0.0540571	0.0820655	PDLIM1
27.1507	27.1507	27.2979	27.2077	0.102055	0.818196	ACOT7
26.5029	26.6595	26.5135	26.726	0.0385389	0.0981346	MYO1C
25.1015	25.2243	25.2571	25.417	0.174126	0.645316	SNAP23
21.5404	21.4273	21.4273	21.2933	-0.123521	0.531439	HAX1
25.5492	25.5667	25.6292	25.654	0.0836515	1.503	AIP
24.1095	24.2021	24.391	24.4234	0.25142	1.4433	GTPBP1
25.5926	25.6918	25.4551	25.5195	-0.154881	0.920738	STXBP3
21.0493	21.1519	21.0359	21.1946	0.0146732	0.0501912	AP4M1
21.1642	21.3699	18.5782	21.5592	-1.19838	0.295287	ARVCF
26.0772	26.6181	25.902	25.7312	-0.531089	0.694724	SMAP
23.867	23.6649	23.9584	23.867	0.146723	0.4992	RAB27B
25.7129	25.7543	25.7594	25.8167	0.0544071	0.579392	AP3B1
19.11	19.5418	19.4537	19.4838	0.142863	0.238773	APBB1
23.48	23.48	23.5522	23.632	0.112076	0.970872	LGALS8
24.5285	24.4488	24.5638	24.4298	0.00815392	0.0332778	NDUFS8
26.8142	26.8858	26.9428	26.9539	0.0983782	0.947057	PSMD11
26.726	26.7517	26.673	26.726	-0.0393562	0.504339	PSMD12
25.5926	25.5955	25.5926	25.5841	-0.00571346	0.476815	PSMD9
27.2262	27.1312	27.0609	27.019	-0.138773	0.935791	ATOX1
19.7436	19.6799	19.7797	19.4147	-0.114552	0.222313	MEN1
20.5545	20.417	20.6096	20.5356	0.0868931	0.418427	CBX4
21.9423	21.9171	22.4451	22.5498	0.567724	2.05128	GET1
25.8834	25.6918	25.7103	25.4645	-0.200208	0.48466	PGRMC1
24.2961	24.2821	24.3778	24.3645	0.0820732	1.86553	SUPT5H
24.0105	23.7895	23.8576	23.5522	-0.195172	0.388029	TAF4
24.895	24.8858	24.9134	24.9043	0.0184374	0.976395	DFFA
17.7591	17.8289	17.9249	17.8648	0.100887	0.796185	RFXAP
23.2679	23.0609	23.2492	23.2679	0.0941553	0.336719	HIP1
29.7942	29.8974	29.7864	29.7988	-0.0531378	0.383093	CLIC1
26.6595	26.558	26.5898	26.6998	0.0360184	0.168926	EIF3F
21.1206	21.2933	21.0951	21.2185	-0.05021	0.165726	WWP2
21.7389	21.6006	21.6757	21.5451	-0.0593443	0.224455	PIK3CD
23.867	23.7895	23.9225	23.895	0.0804939	0.722841	PDHX
24.9539	23.3645	24.2679	23.5404	-0.255116	0.0980747	QSOX1
24.9406	24.9716	24.9847	24.9933	0.0329418	0.750822	DCTN6
23.976	24.0609	23.9847	24.0854	0.0166197	0.0839072	SLC33A1
24.654	24.9672	23.8191	24.8044	-0.498867	0.360174	WASL
19.1234	21.5117	20.3645	20.4972	0.113288	0.0300389	PDE2A
27.019	27.1015	27.1604	27.1214	0.0806274	0.659312	IPO5
21.5915	21.3645	21.6886	21.4526	0.0925941	0.201594	POLRMT
23.1504	23.1961	23.0325	23.1627	-0.0756073	0.41185	EEF2K
25.8764	25.8599	25.8457	25.7995	-0.0456228	0.690601	SAP18
23.4425	23.4551	23.4041	23.5522	0.0292759	0.13569	EML1
25.9847	26.0567	26.0484	26.065	0.0359974	0.363718	IGF2BP3
26.3083	26.329	26.3528	26.391	0.0532093	0.872947	DNM1L
24.4362	24.604	24.632	24.5638	0.0778303	0.31815	RTCA
22.4451	22.5427	22.5117	22.5475	0.0356846	0.249113	PIK3C2A
18.7955	18.9331	19.0021	19.0264	0.149963	0.782899	IFRD1
25.2961	25.2499	25.2535	25.3712	0.0393305	0.223748	PIK3R2
24.141	23.976	24.1795	24.1253	0.0939255	0.40607	GOLIM4
22.7492	22.741	22.8054	22.9406	0.127882	0.699961	MANBA
20.417	20.5261	20.417	20.9316	0.202725	0.282803	TRAF5
26.346	26.8019	26.1214	26.6865	-0.170063	0.163963	AGRN
27.9705	28.2445	28.0965	28.391	0.136269	0.245702	PLOD2
21.3592	21.2302	22.1519	20.7715	0.167013	0.0798486	MEIS1
23.867	23.9406	23.7796	23.848	-0.0899878	0.667275	EXOC5
23.141	23.4676	23.2332	23.1673	-0.104095	0.224868	BTN3A3
24.7077	24.9977	25.2891	25.391	0.487395	1.06204	HMGN4
26.8142	26.726	26.7771	26.604	-0.0795708	0.302123	NDUFA4
26.8623	26.8623	26.9428	26.965	0.091588	1.84263	PSMD14
22.4015	22.1363	22.4526	22.4221	0.168484	0.476271	ZNF593
26.574	26.604	26.6998	26.7129	0.117352	1.72239	BIN1
26.346	26.2243	26.4629	26.4186	0.155581	0.859403	KPNA3
23.7492	24.019	23.8858	23.8764	-0.00301552	0.00691341	STK25
24.6757	25.8764	24.4984	24.3444	-0.854711	0.532514	BCL9
20.3211	20.3321	20.85	20.7955	0.496111	2.50602	KRIT1
25.8528	25.7338	26.0212	25.8764	0.155501	0.621836	PES1
25.1055	24.9088	25.1015	24.8576	-0.0276403	0.0573961	SDCBP
23.6971	23.8093	23.7492	23.8093	0.0260439	0.14142	PITPNM1
24.2891	24.2821	24.4676	24.4488	0.17264	2.474	MPHOSPH10
26.0275	25.9539	26.1332	26.1908	0.171308	1.17389	NOP56
27.341	27.2803	27.4154	27.3239	0.0590076	0.403576	DDX3X
21.5869	21.823	21.4726	21.7995	-0.0689278	0.116331	RNASET2
23.5045	23.7077	23.6757	23.7995	0.131533	0.41559	PODXL
26.1681	26.7771	26.5522	26.726	0.16651	0.18609	CCN1
24.141	24.3578	24.2463	24.4738	0.110619	0.256159	PIR
25.8336	25.9361	25.9781	25.9203	0.0643444	0.410931	KPNA4
22.6119	22.6074	22.6186	22.3936	-0.103513	0.342239	TRIM38
22.4273	22.4551	22.6562	22.5261	0.149972	0.815615	NFIB
20.0559	20.002	19.8621	19.9208	-0.137484	1.12664	E2F3
25.3578	25.2317	25.3066	25.3943	0.0556793	0.264528	PPP6C
22.417	22.1426	22.8093	22.3645	0.307133	0.442695	NME4
20.7471	20.714	20.8576	20.6006	-0.00147915	0.00352031	CES2
24.0275	23.9406	24.0359	24.0443	0.0560627	0.484328	MAN2B1
25.3135	25.2856	25.4138	25.3204	0.0675383	0.523007	PDXK
25.2926	25.6096	25.5754	25.8312	0.252189	0.466913	SCD
23.4923	23.5983	23.4676	23.6649	0.0209675	0.0610982	PLPP1
21.3699	21.5069	20.9098	21.2361	-0.36545	0.75717	PLPP3
23.5522	23.3645	23.5638	23.391	0.0190773	0.0482612	ARID1A
22.6671	22.3129	22.6907	22.5333	0.122023	0.226709	CDK2AP1
24.7895	24.6431	24.976	24.6431	0.0932074	0.18094	SDHD
20.4676	20.3857	20.4476	20.002	-0.201911	0.330845	C2CD2L
21.6714	21.6186	21.7389	21.5261	-0.0125027	0.0363925	NEMP1
20.0426	21.0156	20.3645	22.8633	1.08477	0.298072	FCHO1
24.3239	24.1253	24.4614	24.317	0.164581	0.50587	TXNDC9
23.7594	23.7895	23.7895	23.6757	-0.0418291	0.258787	DPYSL4
22.3565	22.3988	22.4375	22.3778	0.029973	0.302241	TRAFD1
24.4105	24.391	24.5522	24.4738	0.112221	0.963835	COX7A2L
22.7077	22.5545	22.1916	21.895	-0.587767	1.14256	NDUFAB1
24.9977	25.1253	25.019	25.1833	0.0396614	0.130949	UBFD1
23.7796	23.8576	24.0443	24.0443	0.225702	1.54385	CYB561D2
26.9203	27.019	26.9088	26.9316	-0.0494347	0.364302	COPE
21.1143	21.0224	20.9316	20.4325	-0.386294	0.573001	CDC42EP2
26.0233	26.0275	26.0567	26.0813	0.0436401	1.13725	AP3D1
23.8288	24.1253	23.7895	24.1253	-0.0196304	0.0277287	CCS
24.0275	24.217	24.1332	24.3307	0.109739	0.29518	ABLIM1
22.0054	22.5938	23.2361	23.1111	0.873999	0.996431	DVL1
23.7182	23.632	23.6757	23.4676	-0.103411	0.341578	DVL2
20.9742	20.7553	20.9459	20.714	-0.0348139	0.0718949	CHD1
22.8858	22.9933	22.9829	22.969	0.0363903	0.24306	CHD2
24.7441	24.918	24.7945	24.8623	-0.00261211	0.00867939	GOSR2
24.2535	24.1565	24.1642	24.1488	-0.048501	0.369264	TOR1A
23.3239	23.2679	23.4041	23.2288	0.0205383	0.0736045	TOR1B
23.5983	23.6757	23.7077	23.7492	0.091404	0.762245	STX16
24.9977	25.0359	25.0935	25.0691	0.0644827	0.980282	ADAM10
18.7609	18.3128	18.7351	18.6229	0.142157	0.221179	ABCD4
23.7995	23.7695	23.9316	23.9584	0.16048	1.81468	EI24
22.2243	21.7915	22.1079	22.0592	0.0756025	0.118276	ENC1
23.5522	22.9334	23.7492	23.391	0.327333	0.340548	KMT2D
24.2021	24.0935	24.1642	24.1015	-0.0149155	0.0787363	APAF1
22.6865	22.7056	22.7512	22.6992	0.0292187	0.395555	RIOK3
20.4972	20.5731	20.714	20.7389	0.191311	1.38736	MAP2K7
23.217	23.0476	23.1642	23.2361	0.0678692	0.269648	ACOT8
24.8093	24.8811	25.1642	25.3477	0.410772	1.27575	CDIPT
25.7024	25.6513	25.6757	25.4234	-0.127274	0.369588	PDCD5
25.3877	25.3511	25.3545	25.3031	-0.0406113	0.485892	PRMT5
26.2021	26.3926	26.2714	26.3877	0.0322008	0.0968463	NHERF1
20.9459	20.1206	21.2419	20.4775	0.32646	0.207388	CHEK1
23.7995	23.6971	23.867	23.8576	0.114015	0.804685	TNFRSF10B
20.1332	20.343	20.1704	20.3321	0.0131321	0.0314863	FPGT
25.8504	25.824	25.9628	26.0127	0.150525	1.47605	TPP1
20.6364	20.5356	20.7056	17.7778	-1.34434	0.341408	GNB5
25.1488	25.1719	25.1642	25.1488	-0.0038271	0.0922326	TCERG1
25.0975	24.9628	23.7286	25.4645	-0.433589	0.175339	NDC80
26.1814	25.8433	26.0874	26.0041	0.0334244	0.0627347	NRP1
25.1908	25.2607	25.317	25.3376	0.101513	0.965948	TNPO2
21.7056	21.7512	21.6757	21.7915	0.00523376	0.0265727	UNC13B
22.2243	21.9707	21.9812	21.9207	-0.146575	0.422832	POLR3A
18.3297	23.9406	19.2057	18.5838	-2.24035	0.29194	MRAS
24.8093	25.065	24.8288	24.9539	-0.0457678	0.108874	TSPAN4
27.6998	27.8081	27.9869	27.8799	0.179474	0.846536	PSMA7
25.0609	25.228	25.2535	25.2499	0.107252	0.483944	SCAMP3
17.6255	19.9742	17.6485	18.9663	-0.492428	0.125138	PPEF1
19.2277	19.0701	19.8856	19.2044	0.396125	0.426248	PHYH
21.1581	21.1825	21.2125	21.2933	0.0826273	0.722521	BACH1
23.1457	23.1395	23.3101	23.3376	0.181243	2.22266	BCKDK
23.2185	22.9951	23.0707	22.8385	-0.152176	0.352013	IFIT3
25.7129	25.7312	25.654	25.5195	-0.135268	0.734151	MGST3
22.7348	22.741	22.8249	22.8014	0.0752945	1.60122	GEMIN2
26.4346	26.5638	26.2714	26.3014	-0.212816	1.07081	TAX1BP3
24.9977	24.9672	25.1795	25.0813	0.147982	0.989535	GIPC1
23.4425	23.4041	23.3511	23.417	-0.0392418	0.385327	IKBKB
23.0359	22.953	23.0691	22.8423	-0.0387907	0.10878	TIMM23
25.5014	25.3578	25.5135	25.2996	-0.0230484	0.0582537	HAT1
23.0054	23.0443	23.2155	23.0838	0.124792	0.676031	UBE2L6
23.5045	23.4676	23.417	23.5045	-0.0253124	0.189047	CASK
19.7054	19.8197	19.9139	19.9025	0.145643	0.897969	PLD2
24.9977	24.9316	24.9628	24.9628	-0.00182533	0.0172899	UQCRQ
29.1771	29.6372	29.2869	29.5987	0.0356388	0.0411103	MYL12A;MYL12B
25.6181	25.6513	25.6918	25.6486	0.03549	0.491126	HGS
23.9847	23.7995	23.9847	23.7995	0	0	CLGN
24.0609	24.0359	24.0772	23.976	-0.0217743	0.144562	VPS26C
25.7695	25.9157	25.7466	25.8167	-0.0609646	0.275393	PPP1R12A
24.604	24.6153	24.5696	24.5105	-0.0695543	0.83251	GAK
28.2759	28.3324	28.3745	28.3494	0.0578108	0.693102	HNRNPDL
27.3828	27.341	27.4629	27.4551	0.0971699	1.34935	XPO1
23.8093	23.7389	23.867	23.7895	0.0541706	0.387832	BTAF1
23.4425	23.5285	23.5869	23.6209	0.118378	0.90457	ARHGEF10
20.953	20.9316	21.2821	21.0756	0.236532	0.823063	ZNF609
24.8623	24.9406	24.824	24.9847	0.00288773	0.0100342	SPTBN2
23.9406	23.8764	23.8288	23.848	-0.0700645	0.765929	MAST4
25.2353	25.3101	25.2679	25.3545	0.0384493	0.243575	SEC16A
25.3811	25.3877	25.4266	25.4676	0.0626984	1.02512	PLXNB2
21.9637	22.7776	23.1488	23.2679	0.837711	0.748169	AREL1
22.1111	22.0691	22.0918	22.2621	0.0869083	0.370472	KHNYN
22.2477	22.4375	22.6518	22.2593	0.112965	0.183107	TECPR2
25.1449	25.1293	25.2207	25.141	0.0437469	0.404743	U2SURP
22.7182	22.7265	22.9116	22.895	0.180984	2.58311	SETD1A
24.4234	22.9189	26.2607	25.558	2.23819	0.941348	TRANK1
26.1273	26.1871	26.0955	26.1449	-0.0369959	0.355773	SYNJ2
23.5638	23.654	23.5285	23.6865	-0.00145531	0.00494176	SYNM
20.2535	20.3645	20.417	20.68	0.2395	0.628187	GARRE1
21.9847	21.9566	22.0625	22.1519	0.13656	0.998643	KIF3B
25.8599	25.8457	25.965	25.9495	0.104444	1.99864	PFAS
22.2036	22.3699	18.9801	22.5189	-1.53723	0.321495	ERC2
23.087	23.1015	23.1749	23.1719	0.0791636	2.06325	ANKRD28
20.9024	20.8191	20.9672	20.9388	0.0922203	0.766539	ARHGEF11
23.0509	22.8171	23.1332	22.882	0.0735855	0.148882	PRORP
22.8557	22.7895	22.9951	22.9916	0.170734	1.44854	CHUK
24.4041	24.5045	24.8336	24.604	0.264562	0.771632	LSM1
24.5105	24.5165	24.4425	24.3778	-0.103342	1.0642	NPC1
26.5075	26.7895	26.4723	26.604	-0.110381	0.258259	AGPAT2
25.2926	25.3844	25.6784	25.6971	0.34923	1.75656	DEGS1
25.0813	25.2243	25.2243	25.3511	0.134895	0.532339	SCAMP1
25.1253	25.1488	25.317	25.3444	0.193605	2.06805	SCAMP2
27.8385	27.9814	28.0609	28.1747	0.207859	0.821666	ARPC1B
28.1312	28.1507	28.217	28.258	0.0964947	1.29087	ARPC2
27.7453	27.8142	27.9705	27.9814	0.196172	1.52058	ARPC3
24.4298	24.4862	24.4105	24.3844	-0.0605049	0.71974	BET1
19.7137	19.11	19.1582	19.2406	-0.212461	0.253596	ZBTB7B
27.8682	27.7833	27.9705	27.9428	0.13088	1.00294	POLR1C
23.7796	23.6757	23.7594	23.7895	0.0468206	0.320784	PLSCR1
21.2989	20.9672	21.3376	21.0426	0.0570154	0.0855064	TRIM24
26.5551	26.7517	26.4785	26.6181	-0.10515	0.323156	PGRMC2
21.4874	21.2707	20.9171	20.6971	-0.571959	1.1821	EPHB6
19.3802	19.4874	19.499	19.6031	0.117252	0.589822	ADAMDEC1
22.3211	22.417	22.1238	22.4196	-0.0973997	0.225495	RGL2
24.1871	24.2961	23.9406	24.317	-0.112826	0.20556	PFDN6
23.7895	23.6971	23.867	23.6971	0.0387402	0.138166	WDR46
23.8191	23.7286	23.8576	23.7492	0.029542	0.144917	NKRF
23.5404	25.0935	23.4676	23.391	-0.887607	0.429614	GNPAT
25.141	25.8044	25.0691	25.8142	-0.0310678	0.019541	LAMA5
22.9352	23.2535	22.9916	23.3239	0.0634174	0.0922163	ZNF185
21.2593	20.9812	21.2989	21.1332	0.0958424	0.211993	CASC3
23.867	23.8385	24.0443	23.867	0.102905	0.431463	MRPS12
23.1612	22.5662	23.1301	22.7553	0.079031	0.07416	NDUFA1
24.2317	24.1795	24.1332	24.2096	-0.0342169	0.270504	LEPROT
23.7594	23.7389	23.654	23.7895	-0.0273647	0.137717	ACOX3
25.9361	26.1449	26.0105	26.0609	-0.00480747	0.0139596	RER1
27.2077	27.2353	27.2262	27.2353	0.00924778	0.228801	SURF4
24.8528	24.7594	24.824	24.7543	-0.0169716	0.0978456	SPTLC1
23.7594	25.4551	25.6971	25.5898	1.03618	0.459791	SPTLC2
26.558	26.5433	26.5898	26.5463	0.0173597	0.276992	OGT
25.3511	25.5135	25.2856	25.3844	-0.0973024	0.383333	PMM2
24.002	24.0443	24.0526	24.0609	0.0336037	0.586112	TM9SF1
22.4298	22.3988	22.2764	22.3321	-0.110082	1.12749	INPP4B
23.2961	23.4425	23.4676	23.7594	0.244169	0.563343	MID1
26.3135	26.4441	26.1371	26.0422	-0.289177	1.15586	HMGB3
25.5522	25.5225	25.5105	25.48	-0.0420856	0.729745	PPM1G
23.4551	23.5165	23.48	23.5045	0.00640106	0.0633367	INPPL1
26.976	26.9869	27.0505	27.0401	0.0638943	1.86578	EIF3D
27.1115	27.1604	27.1604	27.2262	0.0573559	0.527689	EIF3H
19.7106	20.3752	19.6522	20.0951	-0.169273	0.146989	SLC16A4
24.5345	24.4676	24.4862	24.4551	-0.0303926	0.304403	HDAC3
22.2273	22.2419	22.5237	22.3619	0.208191	0.904709	NVL
24.002	23.9043	24.0772	24.0935	0.132241	0.934568	BCAT2
21.0359	21.0559	20.895	21.0756	-0.0605726	0.241453	YY2
24.1488	23.9584	24.3511	24.1253	0.184639	0.471533	IPO8
24.9803	25.019	25.1332	25.0813	0.107579	1.09786	STX7
27.5536	27.7453	27.7325	27.965	0.199244	0.498875	SLC16A3
22.5754	22.8014	22.8461	22.7735	0.121406	0.383049	SLC31A1
16.0943	16.6675	16.5461	17.1232	0.453694	0.419471	ABCC3
22.6475	22.5823	22.6051	22.5189	-0.0528679	0.365606	ABCC4
23.3376	23.0054	23.5045	23.087	0.124251	0.162942	POLR1G
22.2302	21.4626	19.4411	19.8664	-2.19267	1.42267	TLR3
26.417	26.6458	26.4614	26.6998	0.0491657	0.100138	P4HA2
23.2214	23.184	23.1316	23.1348	-0.0695219	1.18293	CAPN5
25.9694	26.0422	26.17	26.1155	0.136926	1.02292	YKT6
21.9707	21.9637	22.019	21.953	0.0188522	0.202605	NUP42
27.8799	28.0505	28.003	28.0505	0.0615473	0.252719	ARPC5
18.9338	18.9367	20.1206	19.3623	0.806177	0.776329	POLR2D
18.7441	21.8764	16.6407	21.8034	-1.08823	0.123183	CLOCK
22.9742	19.5478	19.0955	21.4221	-1.0022	0.169908	CFLAR
19.116	19.9459	18.4032	17.7035	-1.47761	0.94844	FGF10
22.9423	22.9513	23.1426	23.0951	0.172014	1.71716	PDPK1
23.976	23.7286	23.9584	23.7895	0.0216856	0.0466591	TAPBP
23.8385	23.867	23.7796	23.8093	-0.0583048	0.976142	RNF113A
22.6736	22.5983	22.7471	22.741	0.108114	0.985645	KCNN4
26.4154	26.329	26.4298	26.3562	0.0207806	0.125314	DHX15
25.6595	25.6944	25.6944	25.8019	0.0712223	0.475349	RNMT
23.5638	23.5638	23.5045	23.5522	-0.035531	0.56111	ZZEF1
24.5463	24.6811	24.5463	24.6971	0.00800037	0.0249545	ASAP2
16.5861	20.85	19.3338	21.4874	1.69259	0.258061	FLRT2
22.9513	22.823	23.0426	22.8895	0.0789118	0.290497	TTI1
22.3073	22.4273	22.2905	22.3699	-0.0370884	0.182185	RRP8
23.2821	23.2317	23.2821	23.1348	-0.048461	0.223972	PJA2
21.0088	21.2125	21.2361	21.1581	0.0864105	0.291363	SIPA1L1
26.2426	26.0813	26.1293	26.0212	-0.0867624	0.331739	CYB5B
24.4614	24.417	24.5165	24.4298	0.0339823	0.253696	PRPF4
27.17	27.0609	27.1604	27.0296	-0.0204191	0.0794329	PHGDH
25.6458	25.5285	25.5898	25.5638	-0.0103502	0.0559796	NDUFS4
17.6663	18.0998	18.1859	19.3244	0.872074	0.539753	CRX
19.7133	19.6002	20.0292	19.9283	0.322034	1.29136	PHF1
21.3211	21.391	21.3857	21.4972	0.0853872	0.489905	GPR39
25.705	25.6811	25.6486	25.6703	-0.0336227	0.76126	DYNC1LI2
27.0813	27.0914	27.0914	27.1214	0.0200386	0.478129	PSMD3
25.3545	25.3239	25.4266	25.4234	0.0858421	1.51393	RBFOX2
26.7517	26.726	26.7895	26.7389	0.0253706	0.331646	PAPSS1
18.2005	18.0444	18.1417	18.899	0.397938	0.385601	DLEU1
24.4676	24.3778	24.4488	24.3712	-0.0127048	0.070399	ZW10
24.4425	24.3031	24.4551	24.3778	0.0436487	0.19458	SART1
24.141	24.1332	24.2317	24.217	0.0872192	2.04536	GPAA1
24.8288	24.8717	24.8385	24.9495	0.0437021	0.26824	DAPK3
25.4831	25.6068	25.4923	25.6865	0.0444183	0.132653	TGFB1I1
20.4375	20.2989	20.5069	20.4273	0.0988731	0.466706	AP5Z1
21.1946	21.0359	21.1269	20.9951	-0.0542603	0.186149	HSPA12A
21.8461	22.0393	21.6453	21.8614	-0.189384	0.493085	CTIF
23.0902	23.1111	23.0476	23.0088	-0.0724487	1.09009	PPIP5K2
22.6164	22.7816	22.5333	22.5069	-0.178905	0.780337	MAP3K7
25.7945	25.8019	25.8191	25.9248	0.0737171	0.52484	EEF1E1
19.3606	19.2535	19.4859	19.4959	0.183872	1.11971	LYRM1
23.6096	23.8093	23.9316	24.0609	0.286734	0.86184	RIPK2
18.2194	17.9101	18.3553	18.1194	0.172592	0.329312	WDR62
28.5463	28.5014	28.604	28.5352	0.045743	0.41881	HNRNPR
24.1488	24.1174	24.2243	24.0935	0.0257854	0.131648	PRPF3
26.5255	26.4877	26.604	26.5345	0.0626173	0.594355	TXNL1
26.8385	26.9088	26.8142	26.9203	-0.00642109	0.0320616	TPD52L2
24.1871	23.976	24.317	24.1871	0.170518	0.518987	EMC8
24.7695	24.6703	24.9406	24.9225	0.211617	1.28138	ERI3
23.6431	23.5638	23.5522	23.6096	-0.0225525	0.161028	SYNJ1
23.3511	23.3778	23.4041	23.4551	0.0651274	0.817271	FIBP
26.0629	26.0995	26.1214	26.143	0.0509815	0.858985	EIF4G3
26.4394	26.2463	26.5359	26.4298	0.140063	0.479581	PPIH
17.1279	20.5261	23.6096	24.1174	5.03653	1.00297	KCNAB3
22.4526	22.4576	22.3073	22.3884	-0.10729	0.926719	MBTPS2
23.976	23.9672	23.9495	24.0526	0.029459	0.203088	HTRA2
26.1015	26.228	26.143	26.1927	0.00308704	0.0141667	AKR7A2
26.2096	26.3031	26.2589	26.346	0.0461292	0.263167	EPB41L2
24.7745	24.7594	24.7024	24.6375	-0.0969954	0.998164	TGOLN2
17.8939	17.414	18.05	19.1778	0.96	0.588825	RAD51C
23.8093	23.5869	23.8576	23.5404	0.000857353	0.00136142	LAMTOR5
23.9933	24.002	23.9584	24.0691	0.0160685	0.097179	B4GAT1
21.6409	21.6886	21.928	21.7634	0.180976	0.772223	WIPF1
23.3239	23.6431	23.391	23.6431	0.0335569	0.0534984	ATP8B1
19.4663	19.7111	19.7357	19.7291	0.143718	0.441984	FOXO3
19.8832	19.9882	19.9601	20.1704	0.12956	0.414492	SGCE
23.8576	23.848	23.8385	23.7796	-0.0437946	0.553184	RNF13
18.8222	19.1208	19.4746	17.85	-0.309218	0.128383	CA12
23.867	23.8576	23.7389	23.867	-0.0593224	0.343726	AKAP10
25.7695	25.7466	25.632	25.7103	-0.0869169	0.777873	DENR
25.0732	25.0148	25.1055	25.019	0.0182905	0.119557	XPOT
25.5374	25.4862	25.7695	25.772	0.258984	2.01434	DNPH1
19.477	19.3914	19.5981	19.5637	0.146691	1.06453	HCRTR1
24.9716	24.9495	24.9225	24.8528	-0.0728683	0.734071	TIMM44
24.48	24.604	24.7695	24.5869	0.136216	0.465428	TRAPPC3
25.4362	25.5135	25.4862	25.6458	0.0911303	0.384842	CHMP2A
18.6046	18.7688	18.8799	18.49	-0.00170326	0.00247969	FOXS1
20.5823	20.8876	20.6714	20.7715	-0.0135059	0.0265694	NCK2
24.6431	24.417	24.317	24.1015	-0.320783	0.753671	TSPAN6
23.9933	23.976	24.1332	24.1095	0.136689	1.94419	PLRG1
24.3975	24.275	24.2821	24.3712	-0.00963116	0.0407283	RGS10
26.1035	26.0833	26.3135	26.3049	0.215785	2.58935	ZNF207
24.5869	24.5345	24.5285	24.4676	-0.062624	0.58591	NDUFB5
24.6431	24.6209	24.7389	24.6703	0.0726643	0.741479	NDUFB3
24.945	25.0567	25.2058	25.1488	0.176437	0.972619	NDUFA2
27.8682	27.8142	27.8142	27.7958	-0.0362253	0.47894	GET3
25.902	25.8647	25.9955	25.902	0.0654163	0.490174	BUB3
22.1269	21.6006	21.4526	21.5823	-0.34628	0.481965	PLPP2
17.8941	18.0615	18.0387	18.0852	0.0841589	0.36174	SULT1B1
30.2422	30.3303	30.4334	30.4919	0.176406	1.10052	ACTN4
24.1095	24.1795	24.1095	24.1332	-0.0231476	0.22543	GSTZ1
22.8365	22.9225	22.7995	22.6865	-0.136568	0.711455	BUD23
18.0296	18.5269	18.487	19.4252	0.677883	0.481683	TLX3
21.9495	21.928	22.1079	21.7389	-0.015316	0.0261818	GATC
24.3975	24.1642	24.3444	24.2317	0.00713539	0.0172396	HTATSF1
23.9584	24.1946	23.9225	24.141	-0.044713	0.0930292	KDELR3
24.2961	21.391	24.2463	24.2463	1.40269	0.36042	TRAF3IP2
22.391	22.3778	22.5568	22.6822	0.235094	1.18759	CYTH3
23.1472	22.9707	23.2463	23.1825	0.15542	0.620622	PRKAB2
25.7286	25.7338	25.7543	25.7645	0.0282068	1.41445	AP1G1
23.6209	23.6096	23.5522	23.5522	-0.0630999	2.10659	STX6
22.5237	22.6843	22.6584	22.5754	0.0128899	0.0459207	SYNGR1
26.0854	26.2002	26.0975	26.1908	0.00135994	0.00567967	SYNGR2
21.4626	21.5069	21.5731	21.7995	0.20153	0.652393	SYNGR3
25.4769	25.5433	25.6649	25.5638	0.104255	0.644239	SGTA
25.4614	25.3545	25.3811	25.1253	-0.154697	0.419621	ENSA
22.9864	23.1143	23.0325	22.8442	-0.111957	0.367572	SLC25A20
26.9203	26.9088	26.976	26.976	0.0614128	2.06989	NARS1
20.4375	20.7715	21.3045	21.68	0.887781	1.14494	SPOP
25.1757	25.2607	25.217	25.2607	0.0206375	0.149988	MYO1B
25.1055	25.0484	25.228	25.2058	0.139964	1.35006	SLC25A17
26.3393	26.228	26.5135	26.3828	0.164508	0.709227	NUDT21
25.6458	25.7543	25.6486	25.8167	0.0325499	0.110268	LANCL1
24.2607	24.2463	24.3307	24.2821	0.0529242	0.76343	STRN
24.1488	24.1871	23.867	23.867	-0.300905	2.39585	RRP9
23.976	23.848	23.976	23.7796	-0.0342398	0.0981728	SCO2
20.5069	20.6453	20.7056	20.8727	0.213047	0.724658	CFAP410
23.417	23.4298	23.391	23.417	-0.0194092	0.505276	AKAP8
22.1856	22.0459	22.3538	22.2564	0.189344	0.806526	GTPBP6
22.4349	22.3565	22.5638	22.4849	0.128678	0.833243	SLC37A4
24.7695	24.4362	24.5926	24.1946	-0.209232	0.296856	IDH3B
24.7492	24.6209	24.867	24.7543	0.125634	0.554243	NRDC
28.9484	29.2625	29.267	29.3992	0.227634	0.504023	CALU
26.673	26.6595	26.6595	26.7771	0.0520124	0.325943	EDIL3
21.3538	21.5869	21.4015	21.68	0.0703812	0.133282	ATP9B
25.3679	25.5075	25.2679	25.3101	-0.148709	0.748842	AHCYL1
22.9423	22.9079	22.9116	22.8404	-0.0491524	0.468707	KIF1C
22.8385	22.6843	22.8839	22.8423	0.101713	0.48064	ORC5
25.5463	25.5165	25.7129	25.6403	0.145214	1.18124	NDUFS5
23.5165	24.2961	23.48	23.4551	-0.438768	0.423147	PDE6D
22.7574	22.7203	22.8093	22.6342	-0.0170355	0.0621849	ORC4
22.7533	22.4092	22.4825	22.3884	-0.145841	0.301548	PEX1
25.8142	25.6375	25.8623	25.772	0.0912905	0.342399	RAD21
25.4457	25.3307	25.452	25.3645	0.0200443	0.0929005	DHX16
23.9495	23.8191	24.2317	23.8385	0.150784	0.26572	ZNRD2
18.5907	18.5831	19.5134	15.7964	-0.931987	0.176661	PPP1R12B
23.7389	23.8764	23.9316	24.0691	0.192645	0.730331	BNIP3L
19.4176	19.9882	18.3274	19.3056	-0.886349	0.588446	SH3BP5
22.7369	22.7098	22.6843	22.7492	-0.00656509	0.0609457	MED14
22.8288	23.1206	22.8858	23.1504	0.0433521	0.0725266	PCDH7
24.8904	24.8997	25.1214	25.0732	0.202243	1.84098	PRPSAP2
24.3844	24.2607	24.3844	24.1795	-0.0405979	0.11533	SMARCA5
20.0691	19.9081	20.4576	20.0821	0.281313	0.519465	ADCY3
21.1143	21.9098	21.0088	19.735	-1.1401	0.571456	KIAA0513
24.7645	24.7645	24.8142	24.7594	0.0223417	0.300453	SPAG9
24.1795	24.4984	24.4425	24.3844	0.0745382	0.16069	SUSD5
22.4324	22.3538	22.5451	22.3348	0.0468826	0.14465	URB1
21.9566	21.9601	22.1174	21.9847	0.0926895	0.526489	MGRN1
23.6757	23.5404	23.7796	23.7182	0.140811	0.702018	SIPA1L3
22.7512	22.5568	22.8269	22.6907	0.104761	0.32748	ZFC3H1
21.3857	21.3484	21.6186	21.4626	0.173558	0.788101	LCMT2
23.2535	23.0951	23.3376	23.1158	0.0524225	0.13225	AQR
24.5345	24.5045	24.5638	24.5285	0.0267153	0.433954	OPA1
19.2754	19.1618	19.437	19.285	0.14244	0.56533	ZEB2
21.8152	21.8191	21.9423	21.8538	0.0809155	0.678748	MCM3AP
22.9495	23.0983	23.1673	23.1916	0.155559	0.756667	PIP5K1C
24.2096	24.239	24.2243	24.2535	0.0146484	0.257457	KIF1B
21.8346	21.9352	21.8461	21.9388	0.00755978	0.0352483	MAPKBP1
20.9388	21.4425	21.0292	21.0359	-0.158105	0.225959	MARCHF6
23.7182	23.6649	23.8288	23.7286	0.0871525	0.577799	KDM1A
23.654	23.5754	23.6209	23.632	0.0117092	0.0991829	TBC1D4
16.6752	16.5858	17.1005	16.9074	0.373451	1.13996	PHLPP1
18.1307	18.4723	18.3171	19.411	0.562598	0.366808	TBC1D12
21.9316	21.9882	22.1301	22.0951	0.152705	1.35337	FZD6
20.9243	21.1332	19.4452	18.4098	-2.10126	1.23846	NUPR1
28.9539	28.7031	29.0839	29.1435	0.285158	0.802703	NME2P1
18.7615	19.0929	19.3616	19.1458	0.326491	0.618996	HBP1
26.6458	26.673	26.9088	26.6595	0.124743	0.371885	FADS1
24.8858	25.0401	24.9134	25.0105	-0.000958443	0.00324049	GSDME
26.726	26.7129	26.6998	26.6998	-0.0197039	1.02473	EVI5
26.3477	26.2979	26.452	26.4378	0.122071	1.37437	NRP2
23.1426	23.2066	23.0292	23.2229	-0.0485497	0.166846	MAN1A2
25.5725	25.5404	25.5433	25.4138	-0.0779066	0.439544	ACSL4
26.8858	26.9088	27.0813	27.1984	0.242529	1.25573	SNX3
23.8764	23.7995	23.7796	23.6971	-0.0996113	0.658763	STX10
26.9428	26.8623	26.9869	26.8858	0.0337563	0.184789	OGA
24.6209	24.7338	24.6153	24.6649	-0.037221	0.216487	SORBS3
28.2077	28.3239	28.3869	28.2803	0.0678062	0.31839	SYNCRIP
22.7119	22.6409	22.7389	22.6409	0.0135231	0.073666	CDC40
19.7701	20.0426	19.9882	20.0691	0.122237	0.318451	B4GALT4
23.5404	23.4425	23.7995	23.8288	0.322683	1.61706	RANBP6
23.9406	23.9134	23.9225	23.9043	-0.0135975	0.306983	NEMF
23.7594	23.654	23.7995	23.8288	0.107427	0.724889	GMDS
24.0105	24.1015	24.0935	24.1795	0.0804701	0.48488	NMT2
22.2535	23.1301	22.8764	23.1627	0.327781	0.25896	CCNT1
22.7796	23.4425	22.5938	23.0002	-0.31404	0.297508	GREM1
25.5983	25.6622	25.7208	25.7895	0.124895	0.931998	PLOD3
25.0148	24.6757	24.9977	24.9225	0.114835	0.239283	EIF4E2
21.5261	21.4526	21.7098	21.6141	0.172591	0.985102	CCNT2
24.7234	24.5754	24.6595	24.5638	-0.0377407	0.148698	DIAPH1
23.7695	23.632	23.4676	23.5404	-0.19676	0.89569	SELENOF
23.4551	22.9864	23.3101	22.9171	-0.1072	0.119512	TSPAN3
24.5045	24.5165	24.4234	24.4551	-0.0712185	1.28128	EXOC3
27.5389	27.673	27.611	27.7064	0.0527353	0.231224	PLIN3
22.5846	22.5869	22.6907	22.7935	0.15635	1.03036	SLC16A7
20.2066	20.5451	20.2066	20.5069	-0.0191097	0.0266939	RAD1
22.6843	22.5708	22.8442	22.538	0.0635567	0.133928	PRMT3
18.1108	17.7551	17.9414	17.7141	-0.105203	0.175493	PEX10
26.4409	26.512	26.2874	26.0691	-0.298266	0.914875	KPNA6
28.3578	28.3745	28.2535	28.2979	-0.0904789	1.2053	UGDH
20.9951	21.3376	18.0932	21.4576	-1.39089	0.303453	TPST2
21.0756	21.7182	21.1946	21.6584	0.0296116	0.0235452	LPXN
26.065	26.2262	26.2002	26.2058	0.0574503	0.259492	CTNND1
23.9043	23.6649	24.0772	24.0105	0.259291	0.764105	ICMT
27.17	27.1015	27.1015	26.9977	-0.0861578	0.52256	EIF1B
25.6757	25.7568	25.6811	25.7103	-0.0205851	0.167447	SNX2
25.341	25.2821	25.3943	25.3844	0.0778389	0.917257	DPM1
26.4815	26.632	26.48	26.673	0.019743	0.0522463	USO1
24.0526	23.9584	23.867	23.8288	-0.157557	1.04462	MRPS14
24.3712	24.3578	24.3645	24.391	0.0132523	0.331884	TOM1
22.1332	22.0559	22.1581	22.2332	0.101068	0.695688	PFKFB2
23.7389	23.7182	23.8093	23.7995	0.0758448	1.65397	CCDC22
24.4298	24.1565	24.5696	24.5463	0.264784	0.71385	PQBP1
22.2961	22.1886	22.239	21.8764	-0.184649	0.364712	TIMM17B
25.5638	25.6431	25.7338	25.7568	0.141853	1.12387	PRAF2
25.2096	25.1174	25.3273	25.2679	0.13409	0.871964	DKC1
27.2535	27.189	27.3662	27.3066	0.115176	0.921421	EIF5B
26.8504	26.8623	26.7129	26.6181	-0.19087	1.2413	EDF1
22.3592	22.1519	22.1704	22.1642	-0.0882454	0.314836	KIN
22.6971	22.6693	22.7369	22.8895	0.129992	0.62751	DIAPH2
26.0609	26.1115	25.9977	25.9781	-0.0982618	1.16445	DNAJA2
24.5404	24.4425	24.5285	24.4488	-0.00277996	0.0137407	BRD4
25.7466	25.8599	25.8927	25.5522	-0.0808439	0.157084	CUTA
20.9171	20.9951	21.0691	21.3156	0.236276	0.679521	OPHN1
20.9316	20.8802	21.1765	20.9243	0.144528	0.422509	HUS1
23.5638	23.7389	23.6971	23.2273	-0.189183	0.276369	PFDN1
24.5463	24.3376	24.2607	24.275	-0.174085	0.623475	PPP1R11
17.8669	17.9135	18.2839	18.2844	0.393983	2.45838	KCNJ13
23.2679	23.2243	23.3239	23.2448	0.038249	0.313447	NBN
20.6886	20.6453	20.7876	20.7553	0.10451	1.21653	NOL3
22.0559	21.9098	22.1795	21.9777	0.0957737	0.282016	RNGTT
16.1846	16.7684	17.3983	17.9184	1.18185	1.02588	LILRA1
22.6119	22.5404	22.6074	22.4825	-0.031209	0.150681	ABCB7
20.343	19.9459	20.417	20.1946	0.16134	0.258202	MITF
23.6865	23.6209	23.654	23.6209	-0.0162115	0.153533	SRGAP2
20.7056	20.4874	21.1015	20.9459	0.427235	1.06617	PLXNA2
19.7543	20.0292	18.9991	20.5261	-0.129108	0.0539769	SDC3
22.2736	22.2096	22.3988	22.4221	0.16894	1.41667	FAM20B
28.8623	29.104	29.1866	29.099	0.159641	0.46835	WDR1
20.7715	20.7471	20.6971	20.4476	-0.186993	0.561787	FZD7
19.9302	21.1642	20.6006	20.5356	0.0209208	0.0105212	SLIT3
21.9207	22.5708	22.0493	22.632	0.0948811	0.0715581	MEGF6
22.6992	21.7756	21.5592	21.6929	-0.611373	0.494306	ATP9A
22.6865	20.8034	20.1079	20.4067	-1.48766	0.586688	N4BP1
25.0526	25.0105	25.0105	25.0275	-0.0125456	0.196725	ROCK2
22.9243	22.9423	22.9899	22.9548	0.039012	0.729726	CLASP2
20.002	20.4576	20.8576	20.3645	0.38125	0.42732	PTCD1
27.1507	27.1115	27.1604	27.0609	-0.0204878	0.131577	CPNE3
22.9006	22.976	23.1658	22.9601	0.124679	0.428422	ATG13
22.0459	22.2506	22.0983	22.2989	0.0503397	0.119789	HIP1R
22.6693	22.7553	22.7077	22.6628	-0.0270748	0.198533	OBSL1
23.7796	23.7695	23.848	23.7594	0.0291777	0.236384	RNF40
23.4041	23.5404	23.0592	23.1472	-0.368993	1.34574	PHF2
22.8895	22.6714	22.8557	22.8132	0.0540009	0.170754	ZC3H11A
24.3712	24.2243	24.4738	24.217	0.0476284	0.109008	CLUH
21.1704	21.1332	21.3376	21.3805	0.207237	1.73894	CAND2
22.5823	22.6006	22.6453	22.7307	0.0964956	0.802203	TSC22D2
25.5404	25.48	25.5638	25.5667	0.0550976	0.678077	DNAJC13
21.7955	21.8269	21.8576	21.7471	-0.00883293	0.0497234	PHACTR2
23.5165	23.6096	23.5754	23.6431	0.0461578	0.295311	PPP6R2
24.1719	24.1488	24.0772	24.0609	-0.0912924	1.63432	CNOT3
19.5725	19.6565	19.8178	19.5829	0.0858135	0.249916	SS18L1
23.632	23.6649	23.6865	23.632	0.010767	0.115063	ANKRD17
23.0037	22.9829	23.1047	23.1127	0.115376	2.03904	SIN3B
19.2691	19.0579	19.3992	20.6453	0.858718	0.51266	ATP2C2
24.6431	24.8433	24.7745	24.7182	0.00319481	0.00953604	DNAJB6
20.4874	20.3101	20.7223	18.7708	-0.652138	0.240972	PEX11A
22.7533	22.7077	22.7675	22.6822	-0.00564194	0.0372504	COQ9
25.1984	25.4202	25.2821	25.3066	-0.014946	0.0430026	GGCT
24.918	24.7796	24.8997	24.7846	-0.00665951	0.0233046	NDUFS7
22.3511	22.6475	22.3725	22.7634	0.0686979	0.0938121	RTN2
25.5045	25.4298	25.4676	25.3844	-0.0411139	0.26882	NDUFS2
17.8501	18.1168	18.4542	18.2954	0.39135	0.893247	CDH16
23.848	27.189	23.895	23.7695	-1.68622	0.37747	ZPR1
22.0691	21.8727	22.3101	22.2905	0.32943	1.10116	USP12
24.7441	24.5983	24.6811	24.6971	0.0179071	0.0810298	NIPSNAP2
24.5404	24.7945	24.2317	24.1332	-0.485001	1.15068	SEMA7A
26.3273	26.2353	26.2535	26.346	0.0184364	0.094724	PDCD6
27.1015	27.1115	27.0084	27.0296	-0.0874929	1.75734	TBCA
25.7363	25.7103	25.6125	25.5225	-0.155831	1.09904	ATP6V1G1
25.3778	25.3307	25.4645	25.4202	0.0880775	0.949163	VPS4B
25.8623	25.9716	26.0833	25.9933	0.1214	0.641174	MPDU1
19.3172	19.1722	19.32	19.7038	0.267202	0.491415	ENTPD6
18.4693	18.8912	18.2677	17.9319	-0.580439	0.784731	ZNF217
27.5014	27.7064	27.4707	27.6251	-0.0559988	0.151789	MACROH2A1
26.6865	26.6865	26.6181	26.5898	-0.0825319	1.55074	SH3BGRL
27.6931	27.9088	27.8564	27.9869	0.120632	0.356969	FLNB
22.4247	22.3403	22.4015	22.4726	0.0545292	0.369227	NCOR1
23.1871	23.2961	22.9406	23.184	-0.179304	0.507118	VAMP4
24.7594	25.019	25.0732	25.0691	0.181909	0.528402	NDUFS6
24.0359	24.0772	24.0691	24.0275	-0.00829315	0.0948203	PEX14
24.2607	24.2891	24.391	24.2821	0.0616274	0.411331	TRIM3
21.0359	21.0224	20.9882	21.0156	-0.0272722	0.664111	ULK1
20.3101	20.3962	20.5915	20.4874	0.186281	0.957685	TULP3
27.4785	27.4314	27.3153	27.2803	-0.157153	1.4805	CS
23.8191	23.5869	23.8288	23.6757	0.049263	0.120909	SPAG7
24.217	24.2243	24.3101	24.2821	0.0754128	1.45634	MRPL33
27.9814	28.17	28.0609	28.2123	0.0609007	0.177473	SEC22B
25.1642	25.2021	25.1795	25.2463	0.0297184	0.284208	PRPF40A
23.4041	23.3778	23.3645	23.2961	-0.060606	0.620181	TACC1
21.2707	21.5961	21.5685	21.4273	0.0644941	0.124394	NME6
20.4972	20.6628	20.8576	20.6714	0.184534	0.558007	GIGYF1
22.0723	22.1206	21.9243	22.0625	-0.103056	0.531127	LRCH4
24.2535	24.2607	24.2607	24.2021	-0.0256996	0.322625	MTX2
26.3844	26.3562	26.4661	26.4057	0.0655813	0.725721	VPS26A
23.2096	22.9619	23.2821	23.0641	0.0873775	0.187616	NDUFB1
24.7234	24.6918	24.8093	24.7492	0.0716658	0.771404	PMPCB
20.85	20.9171	20.7955	20.7955	-0.0880041	0.921468	SAP30
22.6387	22.5638	22.5475	22.5213	-0.0668507	0.631504	MED24
20.9882	21.1519	21.2185	20.9388	0.00858212	0.0165643	KATNA1
25.7745	25.6486	25.918	25.7182	0.106519	0.335063	PSIP1
26.2243	26.1115	26.2714	26.141	0.0383072	0.154705	ERLIN1
25.5374	25.3745	25.654	25.5983	0.170215	0.729025	NDUFS3
25.7568	25.7077	25.8647	25.726	0.0630684	0.317277	SRSF10
23.4041	23.3645	23.4298	23.5285	0.0948687	0.665108	CLN5
26.6595	26.632	26.6998	26.6595	0.0338726	0.524177	ECI2
24.7286	24.275	24.8044	24.3307	0.0657892	0.065734	KHDRBS3
20.9882	21.0493	20.7471	20.714	-0.288146	1.84628	TADA3
21.1825	21.0691	20.9388	21.2989	-0.00694942	0.0114487	TAF5L
22.3592	22.0951	22.2679	22.0526	-0.0669031	0.13523	EED
27.4073	27.189	27.7833	27.3662	0.276628	0.442603	BANF1
25.8927	25.9225	25.9473	25.9293	0.0306606	0.657637	SF3B1
26.1776	26.1623	26.1871	26.0813	-0.0357609	0.242456	CSDE1
24.0935	24.1795	24.1565	24.0935	-0.0114813	0.0708173	WBP4
25.1488	25.2856	25.1174	25.2243	-0.0463057	0.189036	PRKRA
20.3857	20.1704	20.6971	20.2989	0.219972	0.36287	CRCP
22.3101	22.3457	22.4298	22.4551	0.114582	1.46224	LRP6
21.4015	21.5545	21.0359	21.7796	-0.070241	0.0603456	MED6
23.7182	23.6649	23.9043	23.9406	0.230865	1.72297	MYCBP2
22.1047	22.239	22.2905	22.4526	0.199727	0.702951	GCAT
25.5075	25.558	25.4738	25.4202	-0.0857277	0.837431	NPM3
25.5404	25.4041	25.5165	25.4831	0.0275898	0.135382	LYPLA1
22.7695	22.743	22.867	22.4576	-0.0939426	0.15995	ERAL1
23.6649	23.2821	23.1222	18.7769	-2.52395	0.435666	CREG1
22.9243	23.3778	23.0821	23.6096	0.194803	0.199423	SERPINB7
26.1757	26.0955	26.204	26.1469	0.0398283	0.298003	SNRNP200
23.5522	19.9882	24.217	20.2764	0.476531	0.058404	TRMU
25.6595	25.5725	25.6676	25.5983	0.0169668	0.102887	TIPRL
24.5869	24.217	24.5754	24.2961	0.0338373	0.0470576	OFD1
23.9225	23.9406	24.0105	23.9406	0.0439978	0.459136	TOM1L1
22.2419	22.1269	22.2764	22.239	0.0732841	0.45688	RPS6KA4
24.8044	24.8717	24.632	24.7338	-0.155182	0.899624	SURF6
24.9672	25.0732	25.0526	24.9847	-0.00154591	0.00760894	PPM1B
24.1015	24.019	24.1871	23.9847	0.0256119	0.0775373	UTP20
25.0275	25.0275	25.1095	25.0935	0.0739784	1.938	NUP155
23.9495	24.0854	24.141	24.1488	0.127479	0.694846	RP2
24.1795	23.7492	24.2961	23.6865	0.0269547	0.0227409	WDHD1
26.0148	25.9157	25.7492	26.1273	-0.0269918	0.0444055	CRTAP
24.317	24.1871	24.3101	24.2096	0.00778198	0.0300449	SLC25A12
18.5421	18.1906	20.5638	20.7471	2.28913	2.12999	PIK3C2G
24.5045	24.3511	24.4105	24.3031	-0.0709486	0.277658	ATP6AP2
23.6757	23.3645	23.7389	23.391	0.0448332	0.0627791	RNASEH2A
22.8054	22.6628	22.9043	22.6671	0.051609	0.127846	CDC123
19.7374	19.7618	19.5576	19.4382	-0.251699	1.26867	CAPN15
21.3857	21.4676	21.6186	21.8152	0.290227	0.949459	BCAR3
22.3129	22.4247	22.2961	22.3266	-0.0573921	0.370101	POP7
22.7995	22.7675	22.823	22.8932	0.0746117	0.715051	RPP40
26.7517	26.7895	26.7645	26.726	-0.0254269	0.351361	EIF3G
26.3342	26.346	26.425	26.433	0.0889177	2.19231	EIF3J
27.6389	27.7895	27.7517	27.8445	0.0838642	0.35354	CBR3
25.8504	26.038	25.7745	25.797	-0.158445	0.628111	PSMD10
22.3184	21.9672	19.9542	19.2768	-2.5273	1.65688	AP1G2
25.9803	25.6237	25.3066	25.3943	-0.451552	0.875665	ZMPSTE24
21.7471	21.7756	21.6409	21.6714	-0.10521	1.43016	PPP1R37
27.1015	27.0914	27.0401	27.1015	-0.0256739	0.304532	IDH1
22.3045	22.1301	22.4196	22.155	0.0699883	0.153733	GATB
23.9672	23.867	24.0526	23.9406	0.0794601	0.396711	SCO1
23.1457	23.1976	23.184	23.3101	0.0754128	0.415912	ATRN
24.275	24.1719	24.2317	24.0854	-0.0648966	0.264618	RBBP9
24.604	24.632	24.5926	24.6431	-0.000152588	0.00162762	STAM2
20.0951	19.9601	20.1581	20.0821	0.0924997	0.450218	TUSC2
22.6649	22.5892	22.6364	22.8014	0.0918741	0.378824	DGAT1
23.1916	23.1976	23.1285	22.9742	-0.143249	0.688981	CCNK
24.7389	24.8044	24.6096	24.7492	-0.0922451	0.451004	DHRS3
26.965	27.0505	26.9203	27.0505	-0.0223694	0.0963476	ARL6IP5
25.065	25.1174	25.1135	25.1984	0.0647087	0.489269	DYSF
21.9316	21.7955	21.9985	21.8307	0.0510931	0.165724	PIAS1
19.094	18.5561	19.099	18.941	0.194958	0.252826	PIAS2
23.632	23.4676	23.4923	23.1931	-0.207123	0.457414	BCAS2
26.5898	26.632	26.7389	26.4692	-0.00684452	0.0156662	DCTN3
25.9738	25.9606	26.0955	25.9998	0.0804625	0.624249	DNAJC8
26.1035	26.0526	26.1908	26.1055	0.0701284	0.532225	SMNDC1
17.7434	21.4775	21.502	20.3538	1.31744	0.24448	RAD17
26.4186	26.4024	26.3511	26.2838	-0.0930481	0.939696	ATP5PD
24.2535	24.4362	23.9847	24.3844	-0.160289	0.266305	TSPAN9
25.6431	25.6703	25.7466	25.7312	0.0822039	1.46233	FLOT1
23.1901	23.2679	23.2346	23.2821	0.0293722	0.232761	TRIO
26.8385	26.8858	26.9088	26.8974	0.040988	0.630339	ATP5MG
23.1991	23.2021	23.1946	23.1079	-0.0493536	0.428064	MPDZ
24.217	24.1642	24.1795	24.217	0.00763416	0.0781022	CPD
26.8142	26.8142	26.8504	26.8019	0.0119715	0.173656	GLRX3
26.3014	26.204	26.2961	26.1927	-0.00824261	0.0370489	RSL1D1
23.9933	24.0359	24.0105	24.1095	0.0453768	0.311369	WFS1
25.0935	25.065	25.217	25.1174	0.0879908	0.635875	CLPX
25.019	25.1719	25.1293	25.2607	0.0995274	0.369066	SEC14L2
22.2621	22.1143	22.9261	22.8249	0.687345	1.78068	STC2
21.1765	20.9243	21.2302	21.3376	0.233497	0.637427	TM7SF2
25.0359	25.1332	25.065	25.1293	0.0125685	0.0709206	CIAO1
25.3844	25.4984	25.3545	25.4892	-0.019557	0.073058	PDE5A
23.0359	23.1379	23.2317	18.3351	-2.30351	0.350493	DFFB
22.4825	22.2214	22.4221	22.1174	-0.0821495	0.141533	ZFAND5
22.1916	22.0951	22.1426	22.239	0.0474567	0.252904	RGS20
19.0525	24.989	24.6431	24.6264	2.614	0.326611	BEST1
25.9584	26.0317	25.9293	25.9694	-0.0456858	0.410742	SRP72
23.895	23.9134	23.7389	23.632	-0.218766	1.24924	JTB
25.4425	25.7568	25.5075	25.6348	-0.028554	0.0546514	DDAH1
18.885	21.2185	21.1015	21.1946	1.09633	0.349799	RECQL5
23.5165	23.4298	23.5638	23.5983	0.107906	0.833061	URI1
23.632	23.5285	23.654	23.6757	0.0846262	0.600948	B3GAT3
22.7056	22.714	22.848	22.7756	0.102028	0.967999	STK17B
21.0821	21.3538	18.8361	20.5261	-1.53685	0.668807	LY6H
25.1833	24.9716	25.1015	25.0691	0.00784683	0.0230746	MTA2
23.2535	23.3239	23.2821	23.1627	-0.0663118	0.356986	STK10
21.4067	21.5961	21.343	21.6364	-0.0116358	0.0209359	PRKD3
23.4676	23.2679	23.391	23.3101	-0.0171967	0.051647	GFPT2
23.2346	23.1127	23.2679	23.3101	0.115321	0.665919	ATG12
19.6509	19.8599	19.8392	19.8616	0.0950251	0.335996	KBTBD11
23.2821	23.1642	23.4041	23.2821	0.119914	0.533212	LTN1
25.0105	24.989	25.1174	25.0609	0.0893745	1.00838	TOMM70
17.6441	17.5433	18.0115	17.9756	0.399873	1.75794	PLEKHG5
22.2564	22.2679	22.2155	22.2096	-0.0495949	1.78142	IPO13
20.9171	20.8651	21.0224	20.9742	0.107213	1.02666	DDHD2
23.3101	23.1931	23.2961	23.2346	0.0137901	0.0685281	TOX4
23.6096	23.6971	23.6431	23.8288	0.0825644	0.296162	MICAL2
27.3494	27.524	27.4073	27.6181	0.075963	0.197481	SEC24D
20.9316	20.85	21.1079	20.7715	0.0489483	0.094805	SUPT7L
20.4375	20.4874	20.0426	19.9014	-0.490443	1.64705	FCHSD2
26.0422	26.0359	26.038	26.0914	0.0256758	0.355933	UFL1
23.5983	23.5638	23.6209	23.6865	0.0725813	0.723058	SORBS2
22.4349	22.4015	22.2989	22.5141	-0.0116549	0.0340795	PHF14
20.1704	19.9742	20.5638	20.3101	0.364675	0.821552	SASH1
21.8538	21.7995	22.0088	21.9352	0.145376	1.06354	TMEM63A
21.5213	21.4726	21.5823	21.5309	0.0596495	0.63014	FARP2
23.7594	23.8093	23.7492	23.848	0.0142679	0.0857887	UBXN7
23.5983	23.7594	23.5638	23.7796	-0.00715542	0.0166267	SUN1
24.9977	24.9361	24.848	24.8576	-0.114057	1.17262	PLPBP
26.8504	26.7895	26.8264	26.7771	-0.0182676	0.163121	ERLIN2
25.8167	25.6703	25.6012	25.3239	-0.280971	0.667686	PRPF6
22.2302	22.3538	22.239	21.9882	-0.17844	0.481442	DKK1
22.8895	22.9601	23.1222	22.937	0.104765	0.396493	PCF11
24.3645	24.3239	24.4105	24.3444	0.0332375	0.31673	FRYL
20.5451	22.0393	20.8423	20.9882	-0.376953	0.176934	NFAT5
24.8336	24.6486	24.6757	24.8385	0.0159931	0.0416228	ENDOD1
19.8131	20.0691	19.8586	19.9316	-0.0459881	0.117681	CDK14
25.726	25.6649	25.9043	25.797	0.155173	0.89141	GLS
22.2707	21.9061	22.343	22.0122	0.0892086	0.123927	HAUS5
24.654	24.7338	24.6757	24.7492	0.0185633	0.116539	ABLIM3
20.4874	20.5451	20.5823	20.8727	0.211261	0.538144	FBXO21
25.2096	25.3811	25.2607	25.2821	-0.023962	0.0927666	KDM4B
23.1642	23.1426	23.3645	22.9152	-0.0135164	0.0188423	RHOBTB3
22.5213	22.3376	22.6562	22.3884	0.0928507	0.203969	MTCL2
23.417	23.3778	23.5165	23.5165	0.119121	1.58529	USP19
24.3778	24.3511	24.3975	24.4614	0.0650005	0.696545	WDR47
25.3066	25.3645	25.4298	25.5045	0.13157	0.965157	AP2A2
27.611	27.7645	27.7581	27.9031	0.142862	0.510676	SEC31A
19.8202	20.6186	21.9459	21.2477	1.37742	0.914518	CAMTA2
21.654	21.7512	21.9423	21.9672	0.252135	1.42739	CLSTN1
23.2051	17.5157	23.0409	22.8014	2.56079	0.334083	ARHGEF15
26.3844	25.965	26.3222	26.3545	0.163611	0.285614	HEXIM1
25.1371	25.2243	25.2571	25.3135	0.104588	0.740603	YIF1A
23.3511	23.217	23.4041	23.2288	0.0323696	0.0985803	UBR5
21.8346	21.8538	21.6714	21.8269	-0.0950413	0.457449	AGFG2
25.9473	26.1833	26.0833	26.0062	-0.0204802	0.0534793	PRSS23
23.8576	23.7389	23.9672	23.848	0.109372	0.490819	SCAF4
20.2989	20.2877	20.6886	20.6971	0.399522	3.50758	S1PR2
25.2133	25.0732	25.2785	25.217	0.104533	0.515401	NDUFB6
23.5869	23.5165	23.5285	23.4923	-0.0413322	0.391485	MFN2
22.4092	22.4067	22.2989	22.2243	-0.146306	1.22676	SNUPN
25.2021	25.2996	25.1527	25.1253	-0.111862	0.801738	UBE4B
23.8858	24.0609	24.002	24.1174	0.0863886	0.303933	ZFPL1
24.0935	24.1719	24.141	24.0935	-0.0154305	0.114328	ELP1
22.8557	22.417	22.9079	22.5754	0.105346	0.131505	NDUFA3
25.0148	25.0484	24.7645	24.7945	-0.25212	2.10173	NDUFB4
23.391	23.1363	23.3376	23.1871	-0.00135326	0.00281885	NDUFB8
24.9134	24.7846	24.9977	24.945	0.12235	0.655974	NDUFA7
24.8717	24.976	24.7645	24.7895	-0.146846	0.95305	VAMP5
27.5014	27.5969	28.066	28.1115	0.539571	2.02372	RTN3
25.767	25.7745	25.8457	25.797	0.0505571	0.753387	LETM1
22.3592	22.3321	22.2448	22.2736	-0.0864563	1.31532	EPN2
23.7492	23.214	23.5754	23.6096	0.110932	0.143134	STBD1
23.0707	22.9933	23.1749	23.1143	0.112569	0.826289	LEPROTL1
25.341	25.3712	25.4008	25.4362	0.0624208	0.937732	ZRANB2
25.2207	25.1642	25.1332	25.0732	-0.0892639	0.788877	SNX4
25.0813	24.9933	24.9977	25.002	-0.0375223	0.31521	LUC7L3
23.8576	22.8764	24.0526	22.9406	0.129573	0.056818	KIF4A
22.3752	22.5237	22.5309	22.4551	0.0435562	0.184761	SBF1
24.0691	24.0935	24.0526	24.002	-0.0539932	0.710906	GOSR1
22.343	22.5754	22.4349	22.1581	-0.162712	0.334427	KAT7
18.9881	20.1079	20.0267	18.5778	-0.245772	0.0896309	IL18RAP
23.5045	23.2961	23.5165	23.3645	0.0402308	0.105377	ATE1
22.5568	22.3511	22.6779	22.4375	0.103698	0.236939	CCNDBP1
26.0732	26.1719	26.2002	26.1661	0.0606642	0.437426	VAPB
22.1519	22.1174	22.1581	22.0325	-0.0393553	0.216903	SNAPIN
24.5869	24.7182	24.6918	24.7945	0.0906105	0.408405	MPZL1
24.9088	24.8044	25.0148	25.0359	0.168721	1.06086	NDUFC2
27.2535	27.2979	27.3239	27.3153	0.0438862	0.717165	NDUFA10
27.7958	27.7708	27.7771	27.9259	0.0682268	0.335912	FKBP9
25.4953	25.5075	25.604	25.5255	0.0633459	0.599166	PGLS
26.5565	26.673	26.6595	26.673	0.0514708	0.325476	PAPSS2
22.8132	22.7369	22.6141	22.5568	-0.189556	1.23681	SIX3
25.3545	25.1527	25.4425	25.0935	0.0144196	0.0225099	SMC2
24.3239	24.3578	24.3511	24.3511	0.0102463	0.216514	ATG7
23.5404	23.4551	23.5404	23.3778	-0.0386524	0.145948	TACC2
24.2821	24.3778	24.2891	24.417	0.0231123	0.0971518	TRIM16
22.1426	22.2155	22.1916	22.2185	0.0259876	0.242289	FARS2
22.2185	22.2506	22.1488	22.1206	-0.0998287	1.367	ZBTB7A
27.7389	27.8799	28.1115	27.9595	0.226046	0.793133	LYPLA2
26.9088	26.8974	27.1604	27.019	0.186609	0.923949	IPO7
23.0854	23.0156	22.8895	22.9672	-0.122167	0.841156	ARIH2
24.1015	24.0359	24.0772	23.9847	-0.0377369	0.240842	TNFAIP8
22.2006	22.1946	22.3156	22.3321	0.12626	2.31944	SLU7
25.8694	25.976	25.7945	26.0547	0.00191212	0.00419749	PGM3
21.9171	21.8385	21.7634	23.0037	0.505795	0.30004	MOCS3
26.2625	25.7796	26.3992	26.1719	0.264503	0.370513	CD2BP2
20.3101	20.3101	20.4775	20.3538	0.10559	0.638276	ZFYVE9
22.6164	22.5777	22.7203	22.9116	0.218865	0.812022	CNIH1
21.654	21.4626	21.8152	21.9171	0.307793	0.979232	BRI3
24.5869	24.4738	24.5105	24.4984	-0.0259275	0.159158	SVIL
19.8865	19.0261	19.4318	17.2455	-1.11767	0.354757	PIGN
18.1166	18.6153	19.3434	19.5408	1.07616	1.24519	PAPLN
22.6497	22.7369	22.5069	22.5165	-0.181552	1.26984	BAG4
26.346	26.3861	26.2996	26.2926	-0.0699215	1.12455	AHSA1
21.0625	21.3156	22.2066	21.4118	0.620145	0.560073	APOM
24.848	24.8093	24.7995	24.7492	-0.0543509	0.640392	PARN
25.8118	25.726	25.705	25.6757	-0.0784903	0.64694	PSMG1
22.1765	22.2419	22.2905	22.3376	0.104861	0.915842	FMNL1
25.3612	25.4008	25.341	25.4234	0.00119686	0.00810896	SGPL1
22.7223	22.6628	22.8365	22.6497	0.0505486	0.18205	CTDNEP1
22.8132	22.7013	22.7895	22.8249	0.0499535	0.314926	ABCA1
24.0854	24.0443	24.1565	24.0854	0.0561323	0.51537	NSA2
24.6918	24.8623	24.7338	25.0148	0.0972233	0.211753	H6PD
24.6757	24.7745	24.7594	24.8576	0.0833397	0.450891	SEC24A
24.3101	24.2961	24.3975	24.5105	0.150915	0.929457	SEC24B
21.9637	21.9134	22.0886	22.1395	0.175491	1.40816	CBX6
19.4473	19.446	19.3757	19.9742	0.228317	0.279693	SLC2A10
20.2535	20.343	20.6186	20.68	0.351084	1.63697	NADK
21.0359	20.9601	21.1079	20.8423	-0.0229263	0.0538394	TDP2
18.0982	17.6634	18.6051	17.5643	0.203877	0.123583	C1orf105
23.2021	23.0173	23.4041	23.2434	0.213994	0.65247	SFT2D2
23.2096	23.1441	23.5404	23.2821	0.234377	0.656348	MPC2
25.8788	25.8694	26.1174	26.0212	0.195218	1.24978	ETHE1
25.3477	25.4394	25.4862	25.5105	0.104785	0.8023	ACSL3
23.2185	23.1079	23.2821	23.1015	0.0286093	0.0902804	POLR1A
24.002	24.1095	24.3511	24.1015	0.170578	0.473425	PCNT
21.2243	21.1269	22.0292	21.391	0.534456	0.620498	YEATS4
18.7135	18.9753	18.8738	19.0591	0.122034	0.278837	ZBTB11
22.9243	22.8288	22.9513	22.9388	0.0684443	0.535748	CNOT4
23.9584	24.0275	24.0359	24.0526	0.0513144	0.544035	STAMBP
17.449	18.0031	17.5864	18.1365	0.135401	0.118154	FSTL3
24.1795	24.1015	24.1174	24.0105	-0.0765181	0.435323	CPSF4
20.0951	20.002	20.0951	20.0951	0.0465546	0.374019	ATP6V1G2
24.8764	25.019	24.9495	25.0567	0.055378	0.22324	ASMTL
23.1457	23.3645	23.8191	23.5983	0.453599	0.999608	CDS2
23.2081	23.0592	23.3101	23.0559	0.0493546	0.113829	CEP43
20.2185	20.6186	20.1332	20.5165	-0.0936737	0.114925	PPP1R3D
25.3444	23.4551	23.3778	25.1946	-0.113526	0.0273991	POP4
24.275	24.1253	24.3101	24.2463	0.0780144	0.35783	HERC2
23.7594	23.5983	23.5983	23.6431	-0.0581627	0.252987	SNAP29
25.9738	25.9847	25.965	26.0401	0.0233145	0.22076	OXSR1
22.6029	22.7451	22.5545	22.68	-0.0567131	0.214253	GGPS1
24.654	24.5754	24.6486	24.5404	-0.0202599	0.1021	HSPA4L
23.7995	23.8191	23.7895	23.8385	0.0047245	0.0583752	PTBP3
23.4041	23.4041	23.1504	23.2679	-0.194955	1.09658	STARD3NL
26.2625	26.0127	26.2714	26.141	0.0686512	0.17116	LSM8
27.4154	27.4551	27.4629	27.5014	0.0469303	0.634825	AP2A1
22.0292	21.9024	22.2535	22.2332	0.277526	1.30493	WIZ
23.2214	23.2021	23.217	23.2679	0.0306616	0.423839	RIGI
25.1488	25.141	25.2021	25.1449	0.0285959	0.370487	STAU1
23.2535	23.0509	23.3239	23.0886	0.054039	0.118626	TTC4
23.2434	23.417	23.2679	23.2679	-0.0623264	0.261738	TMEM50A
21.0088	20.714	21.2419	21.1332	0.32616	0.76056	CAVIN2
25.7103	25.7234	25.7312	25.6153	-0.043623	0.273701	BAG2
25.7363	25.7594	25.918	25.895	0.158645	1.98557	BAG3
25.6595	25.5638	25.6811	25.6153	0.036521	0.226505	MAP4K4
22.3376	22.3403	22.4751	22.4451	0.121141	1.8206	MLYCD
23.9406	23.9406	24.0609	24.002	0.090848	1.04118	CRYZL1
25.7543	25.7389	25.8312	25.8118	0.0748844	1.57922	AIFM1
21.9951	22.1143	21.9243	22.1301	-0.0274668	0.0763612	EML2
19.9459	20.0156	20.3321	20.0426	0.206574	0.523337	LATS1
22.2332	21.9352	22.0756	22.0559	-0.0184078	0.0394541	TSPAN13
25.1946	25.3307	25.2891	25.3477	0.0557547	0.275443	BPNT1
25.317	25.5255	25.6811	25.8044	0.32149	0.930128	FADS2
24.8576	24.8904	25.0526	25.1135	0.209035	1.57999	DDAH2
22.1174	22.0393	22.1519	22.1457	0.0704498	0.669122	ABHD16A
21.68	21.4425	21.823	21.8423	0.271365	0.822633	C6orf47
26.1565	26.2821	26.3959	26.5045	0.230884	0.964429	TXNDC12
23.8093	23.8093	23.895	23.6757	-0.0239267	0.0718524	ECD
19.7822	20.0951	19.6722	19.9882	-0.108494	0.171458	ITGBL1
21.3592	21.8987	21.3962	22.0625	0.100412	0.0774859	EFEMP2
20.3962	20.7389	20.5545	20.7223	0.0708399	0.127225	RECK
21.9566	21.9707	22.1765	21.9243	0.0867443	0.249474	MBD3
23.7895	24.019	23.9406	24.0609	0.0964146	0.272214	TOP3B
24.7543	24.6811	24.3578	24.6431	-0.217253	0.55588	NUDT3
23.5638	23.2961	23.5165	23.4041	0.0303049	0.0685508	BCL10
26.0505	26.1095	26.0526	26.0317	-0.0378532	0.456117	NDUFB10
25.5255	25.5135	25.4862	25.3745	-0.0891867	0.5967	CLPTM1
19.5119	19.1975	19.487	19.2447	0.0111237	0.0175466	ZBED1
23.3511	23.8858	23.6971	23.7492	0.104712	0.134158	MOCS2
25.7155	25.6068	25.6891	25.7208	0.043766	0.283664	TOMM40
24.5105	24.48	24.5463	24.6595	0.107627	0.682372	PEX11B
23.2492	23.2821	23.2679	23.2961	0.0163822	0.276539	PAK4
20.4067	20.5545	20.2764	20.7471	0.0311947	0.0405073	DNAL4
19.4976	19.3274	19.7607	19.4327	0.184167	0.372743	CHEK2
24.7441	22.1301	20.0691	24.4862	-1.15945	0.157588	APBA3
25.9361	25.7895	25.8504	25.7645	-0.0553646	0.235507	ACTL6A
22.1886	21.5777	22.3294	21.6671	0.115076	0.0849977	NSD2
24.217	23.9933	24.3239	24.3031	0.208349	0.68891	MT-CYB
24.7796	24.4862	24.6703	24.4425	-0.0764294	0.142301	CYB5A
31.1361	31.4433	31.2703	31.4532	0.0720072	0.139038	LDHA
26.6865	26.7129	26.8264	26.8623	0.144653	1.63879	GLUD1
28.5933	28.4976	28.7357	28.5718	0.108271	0.429339	DHFR
27.8385	27.9869	27.9372	28.0609	0.0863676	0.33203	CYB5R3
25.7389	25.7695	25.7846	25.824	0.050045	0.738564	GSR
24.3444	24.1253	24.7796	24.5285	0.419189	0.891988	MT-CO1
27.5898	27.5165	27.611	27.5609	0.0328302	0.270441	MT-CO2
24.7492	24.5696	24.8336	24.6096	0.0622244	0.150624	MT-CO3
29.203	29.3153	29.3992	29.4842	0.182553	0.913198	SOD1
26.4138	26.4409	26.509	26.5433	0.0988045	1.33952	PNP
27.4938	27.5826	27.6663	27.5754	0.0826359	0.490783	HPRT1
27.6251	27.611	27.8324	27.726	0.161159	1.02064	GOT2
21.1332	21.2361	21.3538	21.343	0.163757	1.06075	ABL1
25.6971	25.6375	25.7745	25.8019	0.120915	1.17877	EGFR
30.4134	30.7129	30.5389	30.9045	0.158575	0.243088	PGK1
26.5667	26.4846	26.5522	26.5898	0.0452862	0.375079	AK1
21.2066	21.3752	21.8269	21.4576	0.351379	0.646792	F2
24.1642	24.3031	24.4105	24.4738	0.208506	0.951064	PLAU
25.3342	25.217	25.4202	25.2317	0.0503893	0.158434	PLAT
21.9742	22.1976	22.1363	22.7369	0.350689	0.411276	ADA
25.8069	25.6784	26.391	26.1757	0.540709	1.30306	MT-ATP6
20.6971	20.6096	18.3679	18.7742	-2.08232	2.00824	CA2
25.3342	24.8044	25.6838	25.228	0.386628	0.415913	SERPINC1
29.9814	29.9259	30.0349	30.099	0.113253	0.934617	A2M
22.6119	23.2125	23.5404	23.1519	0.43393	0.457329	C3
23.1079	23.2961	23.3778	23.391	0.182397	0.71462	TIMP1
24.2021	23.9847	24.5345	24.5522	0.449915	1.26723	CST3
25.6096	25.7543	25.5522	25.6703	-0.0707245	0.277397	NRAS
24.8717	25.0148	25.0854	25.1371	0.167988	0.801768	HRAS
25.3712	25.3645	25.5014	25.5783	0.172007	1.3296	KRAS
24.558	24.8093	24.7945	24.8811	0.154149	0.436698	LDLR
19.8221	17.8129	18.642	18.4381	-0.277432	0.0918994	EGF
24.4425	24.6865	24.5983	24.7594	0.114364	0.287469	TGFB1
19.5823	19.3753	19.6442	20.0426	0.364624	0.609403	FSHB
20.2764	19.4894	19.3016	19.9997	-0.232223	0.153665	PTH
26.673	26.5374	26.604	26.4057	-0.100389	0.308693	HLA-B
23.2317	23.3376	24.2535	23.5522	0.618199	0.650862	HBD
24.217	23.7594	25.3444	24.0609	0.714422	0.393195	HBE1
22.6164	23.1612	22.7975	23.3101	0.165012	0.153551	COL1A1
23.2021	23.4425	23.3645	23.6431	0.181482	0.368655	COL2A1
21.6364	21.895	21.9777	22.2621	0.354177	0.684667	COL3A1
24.6595	25.5869	24.8764	25.6403	0.135163	0.0742314	COL4A1
22.8034	25.3307	22.8171	23.6431	-0.836973	0.226723	KRT14
23.1095	24.1174	22.5638	22.7715	-0.945778	0.683089	KRT6A
29.8294	29.9259	29.8188	29.9259	-0.00531292	0.0232089	LMNA
25.0484	24.3844	26.3562	24.2821	0.602681	0.196852	APOA1
22.4676	22.9388	23.155	22.9316	0.340087	0.492143	APOE
20.7471	20.85	21.7594	20.8423	0.502295	0.408902	APOC3
21.6714	22.3511	22.8538	22.6186	0.724936	0.741471	FGB
20.895	21.5117	21.5823	21.6409	0.408217	0.497283	FGG
23.1976	23.1765	23.0951	23.2419	-0.0185423	0.0830501	C9
29.8623	30.341	29.7517	30.3303	-0.0606031	0.052273	FN1
27.0609	28.217	28.2445	27.391	0.178815	0.0826602	AHSG
26.4645	28.2803	29.114	28.49	1.42957	0.560844	ALB
20.9171	22.9795	23.4923	22.8913	1.24355	0.435886	AFP
21.7265	23.0559	23.654	22.9441	0.907886	0.454087	GC
26.1174	26.3222	26.3101	26.3612	0.11583	0.412523	TFRC
22.4273	23.1673	24.4488	23.9225	1.3884	1.03446	TF
23.9043	24.9271	25.2353	24.5869	0.495478	0.301742	LTF
22.821	22.8727	23.8093	23.9134	1.01451	2.48622	HPX
26.1871	25.9955	26.228	26.0732	0.059309	0.168978	FTL
27.2445	26.8623	27.4707	26.9428	0.153383	0.164818	FTH1
29.8887	30.2193	29.8608	29.8309	-0.208099	0.472864	MT2A
24.2463	24.0526	24.1565	24.1642	0.0109568	0.0360641	MT-ND1
24.9406	25.0233	25.1332	25.0691	0.119225	0.822835	MT-ND2
21.0493	21.1825	21.4375	20.7471	-0.0235939	0.0210921	MT-ND3
24.2535	23.9933	24.3101	24.1719	0.11756	0.293715	MT-ND4
24.2317	24.1946	24.6757	24.604	0.426715	2.05377	MT-ND5
21.7223	21.8191	21.4526	21.3805	-0.354173	1.55556	MT-ND6
18.4235	17.8744	18.376	18.676	0.377113	0.454299	MT-ATP8
25.4234	25.5433	26.0041	25.7286	0.382966	0.901128	VTN
26.4676	26.524	26.5029	26.5754	0.0433598	0.351904	CAT
24.0772	24.002	23.9134	23.9406	-0.112613	0.972775	RAF1
26.4122	26.2768	26.3528	26.3393	0.00157261	0.00715557	GBA1
24.2535	24.4738	24.217	24.5285	0.00907516	0.0148502	FUCA1
30.9746	31.1239	31.3088	31.3672	0.28878	1.16025	ALDOA
28.1937	28.203	28.5646	28.5898	0.378825	2.90021	CSTB
30.0217	30.1361	30.1842	30.2193	0.122848	0.753161	ANXA1
23.9584	23.9584	24.4488	24.1015	0.316801	0.678406	APOB
24.7286	24.6264	24.7182	24.6971	0.030118	0.206293	NR3C1
24.7492	24.7745	24.7286	24.6918	-0.0516834	0.833256	PRNP
26.0547	25.8433	26.1312	25.9473	0.0902939	0.232578	SOD2
27.3066	27.2979	27.524	27.4551	0.187327	1.48569	OAT
27.7895	28.0711	28.1507	28.2714	0.280745	0.681361	THY1
27.5315	30.0217	27.6798	28.7771	-0.54817	0.139051	KRT1
30.1483	30.2647	30.0609	30.0084	-0.171901	0.940473	TUBB4A
33.0544	33.5641	33.4702	33.5754	0.213579	0.302725	GAPDH
27.0084	27.1015	27.0296	27.1015	0.0106077	0.058738	ASL
27.4073	27.1214	27.4551	27.3578	0.142134	0.350727	HLA-A
22.4526	22.3321	22.4375	22.4972	0.0749502	0.419058	ERBB2
28.2803	28.3109	28.391	28.4032	0.101501	1.59463	CAPNS1
23.3778	23.2021	23.0509	23.0526	-0.238207	0.945434	MT1E
30.2077	30.3724	30.4629	30.5389	0.210858	0.83663	HSPB1
23.4551	22.1015	23.7182	22.0393	0.100399	0.0295111	TYMS
21.68	21.2535	21.6584	17.8634	-1.70585	0.331684	CYBB
28.2216	28.2759	28.3109	28.3951	0.104294	0.762851	RPN1
28.0914	28.1652	28.217	28.3452	0.152769	0.757292	RPN2
27.8081	27.8564	27.8916	28.019	0.123068	0.672228	GNAI2
31.4284	31.2019	31.781	31.8042	0.477465	1.28028	H2AC12;H2AC14;H2AC17;H2AC25;H2AC6;H2AC7;H2AC8;H2AJ
22.4972	22.417	22.7553	22.5309	0.186021	0.586888	SLC4A2
27.5682	27.7129	27.632	27.7453	0.0481176	0.185183	ATP1A1
25.767	26.0317	25.792	26.0062	-0.000206947	0.000373411	ATP1B1
24.3239	24.48	24.7846	24.9584	0.469522	1.24654	APP
24.7695	24.8576	24.8093	24.867	0.0246305	0.163737	ALDH2
21.3857	21.3962	20.2877	20.714	-0.890145	1.27689	CYP17A1
20.9812	20.8576	20.9316	20.9388	0.0157824	0.0847965	ITGB3
26.6998	26.7645	26.4969	26.574	-0.196684	1.2241	HMGN1
27.4551	27.6931	27.217	27.6663	-0.1325	0.184292	SERPINB2
26.5315	26.9203	26.7129	26.976	0.118579	0.178116	SERPINE1
28.1556	28.0965	28.249	28.1015	0.0492144	0.222747	SLC25A5
24.4984	24.4425	24.632	24.6153	0.153179	1.46382	ISG15
23.3645	23.3778	23.3101	23.3511	-0.0405836	0.697775	PCCA
22.3672	22.3511	22.4118	22.538	0.11577	0.67712	PCCB
27.0401	27.0401	27.1015	27.0505	0.0359097	0.531238	EIF2S1
27.0084	27.1115	27.8741	27.7581	0.756169	1.98451	HMGN2
21.4476	21.8073	21.2185	21.7056	-0.165459	0.194114	ICAM1
26.7895	26.8504	27.17	27.0711	0.300556	1.45177	RPLP1
29.258	29.0762	29.4314	29.3662	0.231693	0.85857	RPLP2
29.2285	29.2714	29.3848	29.4571	0.171012	1.25642	RPLP0
22.5141	22.8783	22.8365	22.8327	0.138393	0.278496	JUN
21.6929	21.6714	21.6584	21.7715	0.0328283	0.203395	POLR3D
27.4314	27.632	27.4707	27.632	0.0196571	0.0493338	SSB
25.433	26.2944	26.2262	26.0505	0.274651	0.224853	ATP5MC1
18.1998	19.1722	19.5847	19.0392	0.625959	0.422291	SERPINA7
28.6931	28.9287	28.8385	28.8564	0.0364866	0.104208	ITGB1
29.7227	29.94	29.8188	29.9677	0.061902	0.164543	KRT18
29.5951	29.8534	29.5951	29.708	-0.0727034	0.182227	KRT8
22.6907	23.0258	22.7471	23.1916	0.111105	0.137674	COL5A2
26.4441	26.4738	26.4073	26.4378	-0.0364294	0.640021	UROD
17.9789	18.0142	17.9833	18.1371	0.0636063	0.296908	INSR
24.8997	24.9584	24.7995	24.895	-0.0817604	0.549382	FYN
20.7955	21.0292	20.8876	20.9024	-0.0173197	0.0477133	BCHE
23.7389	23.6096	23.6431	23.6757	-0.0148859	0.0736272	GLA
26.5045	26.632	26.4785	26.6595	0.000742912	0.00206534	GSN
22.9951	22.7327	23.2679	22.8093	0.174684	0.239276	RB1
29.2054	29.1483	28.8264	28.7325	-0.397412	1.73088	PTMA
25.1293	24.5225	25.2463	24.4362	0.0153246	0.00939836	CDK1
28.9705	29.0427	29.0914	29.0762	0.0772381	0.765995	ATP5F1B
18.8939	19.624	18.6943	18.4226	-0.700477	0.669757	S100A9
27.5682	27.5682	27.632	27.1214	-0.191493	0.274534	S100A6
26.4234	26.4629	26.6181	26.604	0.167846	1.81627	EIF4E
17.169	20.3321	17.7006	18.4542	-0.673164	0.143258	CKM
31.995	32.3383	32.0283	32.3276	0.0113239	0.0155334	ENO1
24.4234	24.48	24.4984	24.5285	0.0617304	0.712314	PYGL
28.6075	28.8474	28.7453	29.0375	0.163927	0.321286	GPI
23.8858	24.0691	23.8093	23.7796	-0.18298	0.726865	POLB
30.947	31.2135	31.0217	30.995	-0.0719185	0.190432	NPM1
28.6595	28.4394	28.673	28.6998	0.136968	0.465829	TPM3
26.9088	27.0084	26.8504	27.0609	-0.00297451	0.00791881	ITGAV
25.7695	25.7103	25.6918	25.6918	-0.0481176	0.609775	HEXA
25.1946	25.1449	25.1946	25.0935	-0.0257301	0.15944	SERPINE2
26.1604	26.2188	26.2021	26.2553	0.0390949	0.369846	EPHX1
26.632	26.5478	26.7129	26.3778	-0.0445023	0.0857585	DBI
30.1724	30.2422	30.4234	30.4433	0.226101	1.60517	LDHB
23.417	23.48	23.48	23.391	-0.0129976	0.0789456	CENPB
24.1795	24.0359	24.1795	24.1719	0.0679884	0.352474	GPX1
19.7925	18.811	19.4502	19.5766	0.211679	0.148461	THBD
27.8504	28.066	27.8799	28.2216	0.0925493	0.160032	PGK2
20.8191	21.2933	21.0224	21.9024	0.406207	0.299514	PROS1
29.3239	29.4707	29.3324	29.4492	-0.00646496	0.0216697	P4HB
24.9043	24.7796	24.7695	24.7645	-0.0749283	0.45253	ACYP1
30.4134	30.7849	30.4532	30.7373	-0.00388241	0.00512804	CTSD
31.7333	32.1664	31.8534	31.947	-0.0496349	0.0738967	ANXA2
28.189	28.141	28.1507	28.2353	0.0280542	0.206035	CAPN1
31.4083	31.4334	31.4433	31.4032	0.00242233	0.0325746	TUBB
28.6146	29.1015	28.6075	27.0084	-1.05007	0.473851	MT1B
28.0505	28.141	28.341	28.3109	0.230187	1.39442	PSAP
26.8623	26.976	26.8974	26.9088	-0.0160351	0.0940475	HEXB
25.8409	25.9495	25.6209	25.7517	-0.208868	0.874852	CTSL
31.781	31.9045	31.781	32.015	0.0552502	0.144551	PFN1
22.6431	22.4298	22.6298	22.538	0.0474586	0.141301	BPGM
26.6181	26.5898	26.7129	26.7129	0.109004	1.78455	APRT
26.8385	26.8858	26.9203	26.976	0.0859966	0.845078	EPRS1
28.5969	28.7895	28.5389	28.6181	-0.114743	0.414083	CTSB
19.1744	18.9123	19.558	19.9239	0.697585	1.04476	LDHC
31.3879	31.5014	31.4919	31.4532	0.0278616	0.162494	HSP90AA1
22.1332	22.1795	22.1825	22.1765	0.0231438	0.370594	GALT
29.4214	29.4314	29.5052	29.4649	0.0586424	0.975174	HNRNPC
24.9406	25.0443	25.1015	24.8904	0.00353909	0.00933994	UQCRH
25.7077	25.7695	25.6458	25.772	-0.0296688	0.146332	LAMB1
23.3101	23.2961	23.417	23.3376	0.0741682	0.683512	YES1
26.4614	26.4862	26.5404	26.4676	0.0302258	0.289078	LYN
27.9484	28.2847	28.0557	28.3367	0.0796537	0.124318	TPM2
26.4877	26.5195	26.6458	26.5898	0.114185	1.14729	FH
23.0054	22.6907	23.1991	22.9777	0.240351	0.471198	ERCC1
27.7064	28.3066	27.6389	28.0084	-0.182826	0.183353	THBS1
22.9548	22.9098	22.9441	22.8288	-0.0458202	0.270578	SP1
21.9243	22.1143	21.9601	22.1332	0.0273705	0.0700517	IGF1R
20.4874	20.9672	20.7307	21.1519	0.213989	0.242834	COL1A2
29.109	29.3303	29.2825	29.4374	0.140293	0.3893	ANXA6
22.5915	22.7098	19.3286	19.558	-3.20732	2.79176	RHOC
25.1055	25.4073	25.0233	25.391	-0.0492649	0.0679863	CD55
26.3712	26.5754	26.4089	26.5135	-0.012085	0.0335185	SLC3A2
23.5522	23.5638	23.5404	23.6209	0.0226278	0.197999	GUSB
25.239	25.3031	25.3545	25.4362	0.12427	0.856583	PFKM
30.2869	30.341	30.5481	30.4629	0.191593	1.20184	HSP90AB1
25.3135	25.452	25.3877	25.4551	0.0386572	0.176897	SRPRA
23.7492	23.5285	23.895	23.5869	0.102134	0.191194	ASNS
24.7182	24.8093	24.976	25.0813	0.264901	1.20268	MMP2
23.9225	23.7286	23.9043	23.8576	0.0553617	0.197466	HMBS
24.558	24.3444	24.5285	24.3778	0.0019846	0.00468713	MME
27.5014	27.4234	27.4938	27.5165	0.0427475	0.394659	PDHA1
25.7024	26.067	25.7286	26.2133	0.086215	0.0953294	COL4A2
25.8881	26.0062	26.038	26.0443	0.0939674	0.596641	CYC1
25.4738	25.604	25.5463	25.5433	0.00589371	0.0286711	SNRPB2
26.632	26.632	26.6865	26.509	-0.0342808	0.132847	MET
22.9189	23.3101	22.9777	23.4041	0.0763988	0.0880732	CFH
26.4938	26.4723	26.3256	26.2151	-0.212684	1.19769	SNRNP70
26.515	26.4984	26.6458	26.6181	0.125236	1.78833	ITGA5
25.0854	25.0813	25.0275	25.0567	-0.0412369	0.967594	NFIC
32.7593	33.0034	32.846	32.8422	-0.0372524	0.102912	VIM
24.4738	24.7441	24.6918	24.6486	0.0612278	0.15593	SERPINF2
28.5898	28.6527	28.9203	28.8173	0.247535	1.26287	RPS17
25.391	25.4707	25.4008	25.239	-0.110965	0.46389	GNAI3
30.1604	30.1604	30.3196	30.4334	0.216108	1.20151	ANXA5
23.5638	25.2856	23.0409	23.9225	-0.94299	0.364121	KRT16
29.7597	29.7549	29.6022	29.5481	-0.18215	1.66724	RPSA
28.5315	28.2625	28.3196	28.1984	-0.138013	0.34845	CD63
24.4298	24.2961	24.4862	24.317	0.038599	0.122306	MRPL3
26.6595	26.673	26.7645	26.726	0.0789595	1.21681	SNRPA
24.8576	25.0148	24.6811	24.9406	-0.125345	0.304963	FGF2
27.8741	28.0401	27.8741	28.0296	-0.00524616	0.014393	ENO2
24.7182	24.9043	24.6757	24.7796	-0.0835648	0.288171	ACAA1
25.1135	24.9495	25.0526	25.0359	0.0127668	0.0500691	SRP19
29.7581	29.7195	30.0217	29.8218	0.182962	0.669487	GSTP1
26.8858	26.8504	26.7129	26.7389	-0.142172	1.63861	SNRPC
31.5978	31.8608	32.0737	32.1052	0.360153	0.947566	LGALS1
25.1565	25.2133	25.2096	25.275	0.0573645	0.499875	QDPR
29.8249	29.8858	29.8019	29.6998	-0.104474	0.655476	HMGB1
25.4394	25.5225	25.3101	25.6153	-0.0182743	0.0368885	RBP1
26.5898	26.7389	26.8858	27.217	0.387015	0.777815	SPARC
24.1642	24.1565	24.0691	24.1795	-0.0360966	0.235664	GSTM1
30.0217	30.1724	30.1724	30.5014	0.239872	0.500125	TPM1
26.8504	26.7645	26.7645	26.6458	-0.102308	0.526722	CLTA
24.8997	24.5463	24.7895	24.5105	-0.0729408	0.109751	CLTB
26.976	26.9203	26.9869	26.7771	-0.0661535	0.218825	ANXA4
25.7945	25.7895	25.848	25.8623	0.0631437	1.85388	CNP
24.217	24.239	24.3101	24.239	0.0465546	0.471874	HMOX1
26.5667	26.7895	26.6595	26.8142	0.0587044	0.150369	PDGFRB
26.1585	26.673	26.976	26.9977	0.571062	0.804491	DLD
28.4668	28.3536	28.141	28.1652	-0.257134	1.32682	HNRNPA1
25.654	25.5667	25.6784	25.6181	0.0378561	0.259961	SNRPA1
23.4041	23.5285	23.4551	23.5983	0.0604477	0.229751	CTSH
26.7517	26.8264	26.8974	26.8504	0.0848255	0.711743	COX6C
26.965	26.8741	27.0401	26.9316	0.0662928	0.348855	PARP1
25.217	24.8717	25.3477	24.976	0.117496	0.161937	POLA1
21.714	21.6276	21.8034	21.7715	0.1167	0.896907	IFIT2
23.7389	23.6757	23.8288	23.7182	0.0661602	0.389202	IFIT1
29.995	30.1361	30.2308	30.362	0.230846	0.857314	UCHL1
22.2214	22.1704	22.5708	22.1642	0.171636	0.309499	FURIN
26.7389	26.558	26.2891	26.4073	-0.300255	0.96348	LTA4H
26.8858	26.7645	26.9203	26.8741	0.0720568	0.417395	ALDOC
24.7286	24.7796	25.1015	24.9361	0.264708	1.03461	C4A
28.6492	28.995	29.0111	28.7645	0.0656509	0.104351	H2AZ1;H2AZ2
21.2302	21.4221	21.0426	21.1946	-0.207581	0.634493	FBXO45
21.2877	21.3321	20.1084	18.6729	-1.91925	0.935142	CT62
17.1221	17.4189	19.3041	19.5049	2.13406	2.15649	OR5G3
22.2036	22.2535	22.4874	22.2849	0.157594	0.568915	CISD3
19.9882	19.5379	19.8039	19.7608	0.0192995	0.026981	ATXN1L
20.6186	20.7389	20.5165	18.8574	-0.991819	0.449307	CCNYL3
20.417	22.8034	17.6551	19.9442	-2.81058	0.6359	BAALC-AS2
16.5573	17.0413	16.9077	18.154	0.73152	0.411145	JMJD7
20.0292	19.9107	20.0951	19.8439	-0.000433922	0.000960657	POLR2M
24.4984	24.3101	24.2679	24.3444	-0.0981302	0.360398	DERPC
20.1825	19.0824	20.5823	20.2877	0.802539	0.531495	CHTF8
24.989	25.0317	25.1095	25.1135	0.101113	1.37547	GSTT2B
16.2933	16.0759	16.1562	15.8714	-0.170795	0.355548	MTRNR2L7
23.7895	24.0609	24.1795	23.9043	0.116678	0.216573	TSPY8
22.9477	22.8346	22.8651	22.9707	0.0267668	0.117852	TRAPPC2;TRAPPC2B
18.5735	18.6174	18.7138	18.2335	-0.121837	0.178092	RGPD1
18.9317	19.9459	19.9059	19.6312	0.329764	0.225969	SULT1A3;SULT1A4
27.965	28.0453	28.1747	28.267	0.215698	1.14381	HSPA1A;HSPA1B
30.2759	30.5754	30.2979	29.9259	-0.313737	0.495697	CALM1;CALM2;CALM3
20.6628	20.9024	20.7389	20.5356	-0.145305	0.344154	SCHIP1
23.2679	23.1127	23.2288	23.2477	0.0479755	0.220485	POLR1D
21.2764	21.1143	21.1825	21.3752	0.0835228	0.240106	EEF1AKMT4
14.3878	19.6338	22.3936	21.5213	4.94668	0.690566	UGT2A1
21.2006	21.2243	21.6843	21.632	0.445686	2.38427	ZFTRAF1
18.1823	17.9411	18.3289	19.1542	0.679817	0.594092	ZSCAN22
23.9933	23.895	24.141	23.895	0.0738382	0.198417	FDX1
24.9933	25.0148	24.9933	25.0732	0.029191	0.257162	RAP2A
20.2419	20.6886	20.6364	20.6886	0.197266	0.325274	SRGN
26.2408	26.2891	26.3359	26.4057	0.105801	0.885196	RO60
25.2317	25.3031	24.9628	25.2714	-0.150306	0.353777	GAA
21.1143	20.9742	21.0088	21.0756	-0.0020237	0.00808372	RARA
26.4877	26.7389	26.4785	26.7771	0.0144529	0.0233322	RRAS
27.1507	26.8385	26.9316	26.8623	-0.097661	0.219257	HLA-C
23.0122	23.1047	23.0805	23.1719	0.0677319	0.390598	ARAF
31.0544	30.9188	31.0084	31.13	0.0825844	0.337055	H1-4
25.1055	25.0772	25.1174	25.0443	-0.0105181	0.0895544	DLAT
22.0789	21.9707	22.2361	21.9495	0.0679941	0.154592	PTPRF
23.7995	23.8385	24.0935	24.0105	0.233026	1.43697	NR2F6
23.7077	23.7286	23.6431	23.6971	-0.0480442	0.621377	NR2F1
30.1724	30.099	30.4532	30.362	0.271921	1.36344	TXN
26.2625	26.2133	26.3877	26.1852	0.0485735	0.16305	COX5B
27.1015	27.2625	27.0401	27.189	-0.0674648	0.221119	CTSA
28.5933	28.3282	29.1263	28.9896	0.597183	1.24327	MGST1
26.0711	26.0084	26.0935	25.965	-0.0105276	0.0474886	PRKAR1A
23.6096	23.654	23.5404	23.391	-0.166147	0.778258	TFPI
25.3477	25.3342	25.5696	25.3877	0.137737	0.568447	UROS
27.5315	27.4862	27.6865	27.7129	0.190873	1.73555	ESD
29.7645	29.8339	29.9677	29.843	0.106151	0.559861	HSPD1
19.173	19.6168	19.2212	20.5915	0.511422	0.258639	HAPLN1
18.6563	16.7562	18.3869	17.4486	0.211448	0.0653628	IAPP
30.7211	30.9746	30.8004	31.1115	0.108085	0.191087	HSPA5
25.4707	25.6403	25.3612	25.6012	-0.0743446	0.178412	LAMC1
25.0732	25.0732	25.0443	25.1795	0.0387192	0.204346	ACP2
23.417	23.5285	23.5404	23.5983	0.0966024	0.578379	MAP2
30.5933	30.6713	30.7613	30.6881	0.0923605	0.64538	HSPA8
28.8974	29.1435	29.2625	29.2647	0.2432	0.728703	SLC2A1
26.8974	27.1015	26.8504	27.1312	-0.00858688	0.0154536	SLC2A3
22.7203	22.8385	22.7035	22.8764	0.0105839	0.0321073	EPB41
25.2243	25.0813	25.1984	25.1174	0.0050621	0.0193246	UMPS
26.4938	26.417	26.067	25.895	-0.474372	1.42914	PDHB
24.3645	24.2317	24.0443	24.0275	-0.262229	1.22602	DBT
27.4629	27.4629	27.5165	27.5165	0.0535812	0	PYGB
26.0547	26.1095	25.9933	26.0443	-0.0632629	0.632758	RALA
25.0813	25.1795	25.2207	25.2856	0.122725	0.763496	RALB
24.6649	24.7024	24.7129	24.7286	0.0370951	0.679295	BCR
28.2535	28.3367	28.1652	28.1842	-0.120392	0.974412	LAMP1
24.8142	24.7695	24.848	24.7895	0.0269356	0.267247	ACADM
25.8881	25.8069	25.9248	25.8167	0.0232477	0.117026	TOP1
22.8171	22.1612	22.8269	21.9637	-0.0938787	0.0562823	TOP2A
28.1164	28.2847	28.2123	28.3745	0.0928459	0.292286	G6PD
23.9672	23.895	24.0105	23.9406	0.0444212	0.327951	UBL4A
22.7553	23.0691	22.7715	23.0509	-0.000968933	0.0014188	PC
25.0935	25.1565	25.217	25.3135	0.140262	0.867948	DMD
27.0401	27.0296	27.1795	27.0813	0.0955601	0.71544	MTHFD1
26.0212	26.1352	26.0338	26.1642	0.0208616	0.079821	IGF2R
27.7771	27.8081	27.9088	27.9372	0.130447	1.60243	ADH5
23.9134	23.848	24.1332	23.9584	0.165051	0.659547	CDK4
24.6811	24.5522	24.7695	24.5983	0.0672903	0.226081	PRPS2
27.7771	27.8264	28.1312	28.0453	0.286553	1.54345	PABPC1
27.726	27.5682	27.7453	27.4862	-0.0313349	0.0677824	PCNA
21.6276	22.823	20.8191	21.5731	-1.02917	0.54884	KRT3
28.4976	28.5352	28.5718	28.5203	0.0296392	0.346067	HARS1
25.4583	25.4202	25.5045	25.5135	0.0697527	1.15232	SLC25A4
29.1913	29.2308	29.3494	29.2692	0.0982618	0.798502	SLC25A6
19.3494	19.5648	19.6343	18.5812	-0.349371	0.234802	F5
27.1214	27.2262	27.3494	27.0401	0.0209656	0.0411553	IMPDH2
25.5315	25.5225	25.5433	25.5075	-0.00159645	0.0273324	TPR
24.4298	24.5345	24.5105	24.5345	0.0403442	0.2752	ANXA3
17.6428	17.6018	17.6853	17.7658	0.103257	0.824496	BMP4
23.6096	23.6865	23.6096	23.7389	0.0262337	0.118913	BCKDHA
29.4374	29.5916	29.6268	29.6831	0.140483	0.639997	ACTN1
22.5915	22.4751	22.7512	22.4247	0.0546904	0.106656	ACE
25.654	25.7594	25.7895	25.8215	0.0988283	0.668645	SRC
25.0401	25.0691	24.9361	24.9539	-0.10958	1.6328	PEPD
28.1115	28.0864	28.17	28.1842	0.0781727	1.48908	XRCC6
28.1361	28.1604	28.2216	28.1065	0.0157785	0.0895839	XRCC5
19.2041	19.068	19.5282	19.3839	0.320036	1.07534	NR2C1
27.8564	27.7389	27.9031	27.8385	0.0731335	0.409819	COX4I1
28.459	28.4154	28.7708	28.8081	0.352215	2.18165	LAMP2
28.1214	28.1361	28.0505	28.1507	-0.028142	0.197672	RNH1
22.5708	22.8651	22.5685	22.9243	0.0284395	0.0394164	BMP1
27.7064	27.8142	27.524	27.673	-0.161754	0.656194	VCAN
22.928	22.5615	22.9707	22.6497	0.0654488	0.0897194	ITGA4
29.9259	30.0479	30.1115	30.0864	0.112014	0.669852	EEF2
26.0854	28.5969	26.574	27.7129	-0.197684	0.0461725	KRT10
23.4041	25.5841	23.4298	24.2021	-0.678098	0.209733	KRT5
29.066	29.3196	29.2759	29.4512	0.170744	0.416349	PDIA4
27.4473	27.8203	27.509	27.9203	0.0808353	0.0978117	P4HA1
29.3869	28.7581	28.7031	28.604	-0.418981	0.496689	TPT1
24.9847	25.0484	25.0772	25.1449	0.0945253	0.74708	ALAD
25.8647	26.2821	25.9628	26.2335	0.0247869	0.03165	F3
23.2521	22.8538	23.0509	22.8014	-0.126727	0.191324	HLA-E
20.2989	20.0821	20.3752	20.6971	0.345606	0.663769	HLA-DOB
28.6285	28.7549	28.6355	28.7802	0.0160952	0.0543533	PLS3
25.9694	25.9847	25.9225	25.945	-0.0432587	1.06402	APEH
26.3307	26.4969	26.5754	26.8264	0.287105	0.706345	ETFA
24.7796	24.9271	24.7796	24.9134	-0.00681591	0.0215178	GYS1
25.3778	25.433	25.3376	25.4138	-0.0297508	0.227831	PRKAR2A
25.8288	26.0338	26.673	26.632	0.721213	1.69107	ENO3
25.3943	25.3342	25.3477	25.3135	-0.033577	0.362517	GTF2F2
29.5389	29.5916	29.3303	29.4785	-0.160844	0.751064	CD59
25.2996	24.9977	25.3477	25.0975	0.0739584	0.129408	MTHFD2
29.7178	29.9259	29.9117	30.0479	0.15793	0.479085	MIF
23.2273	23.8858	23.8385	23.7077	0.216537	0.232853	CD99
20.0951	20.895	20.2877	20.3752	-0.163611	0.140458	PRF1
28.3662	28.3787	28.2847	28.3023	-0.0789394	1.74317	PRKCSH
26.976	26.6998	26.9869	26.6458	-0.0215254	0.031143	FDPS
19.3396	19.4645	19.1766	19.6515	0.0119991	0.0152667	TRIM27
25.8118	25.5638	25.7208	25.5105	-0.0721588	0.154593	COX7A2
20.7715	19.6935	20.1704	21.7512	0.728282	0.278985	DRD2
22.0951	22.3073	22.0459	22.3045	-0.0259571	0.0501602	NID1
26.7389	26.7645	26.9203	26.9539	0.185404	1.89467	AKR1A1
31.8271	31.9882	32.0609	32.2619	0.253713	0.726532	PKM
22.9171	23.0426	23.0426	23.1504	0.116641	0.531774	ACYP2
30.8234	31.0544	30.8974	31.2019	0.110733	0.206983	HSP90B1
29.8623	30.0864	29.995	29.8741	-0.0398226	0.10567	MYL6B
27.5898	27.6798	27.611	27.4785	-0.0900164	0.422567	SNRPB
27.7195	27.7195	27.726	27.7325	0.00975513	1.0225	IDE
26.6595	26.5898	26.673	26.4707	-0.0527534	0.173418	COX6B1
20.3645	20.4576	20.6006	20.6276	0.202995	1.27939	POU2F1
28.1214	28.1937	28.3828	28.3239	0.195806	1.28176	HNRNPL
27.1795	27.2077	27.2353	27.2625	0.0553226	0.976186	DARS1
26.2643	26.4473	26.3511	26.509	0.0742798	0.220845	JUP
25.9248	25.6998	25.7945	25.7286	-0.0507221	0.150284	UQCRB
21.2419	21.4375	21.3266	21.4015	0.0243587	0.0769353	BRAF
20.7796	20.5356	21.7915	20.7796	0.627949	0.454721	CPA1
22.5638	22.265	22.7077	22.4196	0.149206	0.262126	GLUL
28.1214	28.1312	28.2123	28.2625	0.111095	1.30944	AKR1B1
22.7327	22.9882	22.7348	22.9584	-0.0138569	0.0257806	ANPEP
24.4738	24.7995	24.5983	24.848	0.0865393	0.146177	PVR
26.53	26.5225	26.5725	26.518	0.0190239	0.251297	GSPT1
22.9899	23.0838	22.8191	23.0002	-0.127151	0.470067	ARSA
24.1795	24.217	24.3239	24.2679	0.0976362	0.994084	B4GALT1
30.1724	30.3196	30.4234	30.4032	0.16736	0.815053	EZR
20.6971	20.9098	20.4476	20.4676	-0.345831	1.07786	ATF2
26.329	26.3444	26.3153	26.3204	-0.0188303	0.837864	UCHL3
21.895	21.6096	22.3457	22.155	0.498007	0.995325	FOSL1
23.2081	23.3645	23.5404	23.7182	0.342975	0.993977	FOSL2
24.9539	25.0443	25.1757	25.0813	0.129403	0.730226	CD46
29.8959	29.8916	30.0609	30.0609	0.167111	3.77336	NME1
28.0609	28.2262	28.1556	28.4938	0.18117	0.359136	NQO1
26.6458	26.673	26.4488	26.5898	-0.140112	0.720876	GNS
22.2273	22.1047	22.3672	23.2535	0.644353	0.542941	PHKG2
20.6971	22.0756	22.0359	19.5908	-0.573009	0.141085	IGLL1
23.417	23.48	23.3645	23.3645	-0.083972	0.933149	ARSB
29.3088	29.2714	29.5426	29.57	0.2662	2.12551	RPS2
22.2066	21.9812	22.0821	21.9742	-0.0657167	0.186151	CHN1
19.1221	19.2017	19.4132	19.2048	0.147155	0.497766	TCF4
21.3101	20.2877	21.4118	21.2707	0.542374	0.39416	TCF3
25.6264	25.792	25.6292	25.6811	-0.0540752	0.224239	DSP
26.4409	26.2821	26.3729	26.2944	-0.0278864	0.106373	RPA2
24.1015	24.1642	24.141	23.8288	-0.147945	0.34592	COX7C
23.4425	23.6431	23.8385	23.8858	0.319316	1.04469	TIMP2
29.8203	29.7973	30.0084	29.9539	0.172353	1.55021	CD44
24.7338	24.8811	24.7945	24.848	0.0138483	0.0574786	NQO2
33.0895	32.901	33.2619	33.1483	0.209869	0.705862	H2AX
22.4601	22.6276	22.5731	23.0967	0.291044	0.397272	ITGB4
28.2262	28.3787	28.1937	28.341	-0.0351095	0.112407	CBR1
24.5463	24.6703	24.4738	24.632	-0.0553894	0.195911	CREB1
22.2849	22.1519	22.343	22.3484	0.127306	0.70799	SLC25A16
25.7312	25.8552	25.6375	25.7995	-0.0746784	0.267463	GLB1
20.7553	17.9282	19.312	20.0691	0.34878	0.0789307	PECAM1
26.2499	26.1035	26.1661	26.3324	0.0726061	0.236943	PPP3CB
23.5404	23.6096	23.5754	23.6096	0.0175228	0.158297	NCK1
21.7553	21.5404	21.7265	21.6364	0.0336237	0.0968681	GCFC2
19.6752	19.3768	18.6643	19.3697	-0.50905	0.501518	KCNA2
30.995	30.8829	31.0017	30.94	0.0319347	0.17575	H1-5
23.7594	24.1642	23.895	23.8385	-0.0950575	0.162667	H1-3
29.0531	29.0322	29.0375	28.8385	-0.104698	0.392333	H1-2
24.9584	25.019	25.0233	25.0105	0.0281935	0.338157	POR
22.7307	22.7013	22.7348	22.7836	0.0431843	0.571271	FER
27.341	27.3324	27.3494	27.4073	0.0416584	0.536952	ATP2A2
19.6373	19.578	19.8699	20.2989	0.476785	0.799716	CPE
25.9157	25.8457	25.9271	25.8997	0.0326777	0.321943	FAH
28.7988	28.4433	28.7645	28.3367	-0.0705004	0.0843058	STMN1
29.0217	28.7357	28.7357	28.7645	-0.128612	0.332299	YBX3
21.343	21.0691	21.2419	21.0691	-0.0505428	0.105408	ZFX
18.683	19.0317	18.4293	20.714	0.714325	0.222226	ZNF14
21.1704	20.8034	20.0878	20.654	-0.615946	0.678991	ZNF24
17.9724	17.6497	18.2529	18.2522	0.441514	0.952015	ZKSCAN1
23.8093	23.7995	23.7077	23.7895	-0.0557785	0.510364	NAGA
27.7708	27.8504	28.066	28.0505	0.24765	1.58824	HSPA6
30.2308	30.1239	30.341	30.1361	0.0612307	0.187721	HMGA1
22.9933	22.9548	18.5895	23.1063	-2.12619	0.350797	ZNF8
23.2961	23.1269	23.3645	23.3239	0.132679	0.57378	TMEM11
26.5898	26.726	26.6998	26.7645	0.0742226	0.36786	GOT1
25.654	25.8288	25.6458	25.7995	-0.0187817	0.052273	PRKCA
21.6409	21.5731	22.502	22.4626	0.875348	2.69947	JUNB
26.8623	26.673	26.8504	26.7517	0.0334187	0.105782	ITGA2
26.4769	26.5565	26.632	26.7645	0.181499	0.843762	GJA1
24.0526	24.1332	24.0359	24.1095	-0.0201969	0.126775	SMPD1
24.848	24.8528	24.8764	24.8044	-0.0100174	0.0928992	UBTF
22.5141	22.5451	22.6497	22.5451	0.0677662	0.468698	JUND
23.1269	23.3511	23.3239	23.0459	-0.054101	0.102099	CTRB1;CTRB2
23.1269	23.0258	18.7764	19.9349	-3.72071	1.62773	CKMT2
21.7265	21.6671	21.5545	21.3211	-0.258981	0.784026	ATF7
24.0691	24.4676	24.0526	23.976	-0.254073	0.472215	NDUFB7
24.5522	24.654	24.9361	24.6431	0.186472	0.453076	PRKACA
28.4629	28.3951	28.4473	28.4154	0.00230503	0.0192867	CAPN2
23.1379	23.1332	22.9847	23.0156	-0.135394	1.88258	CEBPB
20.9601	20.654	21.0951	21.743	0.611968	0.638687	GAP43
22.8404	22.7286	22.8249	22.7715	0.0137472	0.0731525	PTPN2
27.5014	27.2445	28.673	28.6898	1.30848	2.02023	CTPS1
28.1214	28.0296	28.203	28.0813	0.0666771	0.32426	DDX5
26.604	26.7645	26.8142	26.9977	0.221708	0.676803	PFKL
23.8764	24.0691	23.9406	24.0772	0.0361519	0.103223	GM2A
26.217	26.3204	26.2571	26.604	0.161839	0.331986	LGALS3
20.3101	20.2764	20.7553	20.5731	0.370977	1.24352	IGFBP3
26.7389	26.7517	26.8385	26.7895	0.0686684	0.946819	PSMC3
28.0296	27.9814	28.1459	28.1507	0.142804	1.55962	TCP1
25.5869	25.5463	25.5926	25.5725	0.0159864	0.25668	PTPN1
22.7876	22.7895	22.8171	22.7614	0.0007267	0.00807765	ERCC2
28.6561	28.7031	29.0003	28.9512	0.296183	1.88843	RPL35A
26.4692	26.632	26.3745	26.5898	-0.0684452	0.178857	ITGB5
28.8355	28.8294	28.7227	29.0965	0.0771704	0.142828	ARF4
29.258	29.3023	29.4649	29.4995	0.202085	1.72613	RPL7
21.8113	21.5823	22.8895	22.6409	1.06837	1.61767	EGR1
29.3088	29.3971	29.4113	29.4995	0.10248	0.61564	VCL
21.2877	21.5165	21.4626	21.2593	-0.0411739	0.0898306	PTPRA
20.2419	21.0359	20.1825	21.0292	-0.0330534	0.0178373	NAT1
25.8044	25.8504	25.8409	25.8215	0.00378132	0.0489032	SON
23.48	23.3101	23.155	23.1916	-0.221749	0.901805	NELFE
28.8504	28.9146	28.9622	28.9203	0.0587482	0.576729	RPL17
30.5573	31.0414	30.6713	30.8534	-0.0369596	0.0460204	PGAM1
25.5667	25.6181	25.6918	25.6458	0.0763969	0.804435	RCC1
26.4441	25.7821	26.1984	25.2856	-0.371114	0.238059	SDC1
24.4738	24.4551	24.5638	24.558	0.0964441	1.99341	ATF1
20.4775	20.417	20.5069	20.6096	0.110994	0.690873	ATF6
23.4676	23.002	23.654	22.9548	0.0696392	0.0537616	LIG1
22.4476	22.3778	22.6562	18.4453	-1.86196	0.328035	ATP5PF
23.895	23.867	24.0691	23.8288	0.0679054	0.199966	XRCC1
22.6584	22.7327	22.6628	22.9707	0.121166	0.28047	PAM
26.509	26.558	26.4645	26.4551	-0.0736837	1.00842	CDH2
23.48	23.239	23.6209	23.2419	0.071888	0.108343	GNAZ
24.0359	24.0691	24.0526	23.9933	-0.0295248	0.322275	PLCG1
22.0723	22.1332	20.1187	18.4382	-2.82437	1.10597	EPOR
24.5463	24.6649	24.4984	24.5045	-0.104179	0.654537	CD58
29.0531	29.0505	29.2692	29.1532	0.159367	0.954838	NCL
27.0609	27.1312	26.9539	26.976	-0.131097	1.14981	HK1
23.632	23.5285	23.7077	23.7695	0.158337	0.922542	POLR2C
26.9428	26.8019	26.9869	26.8858	0.0639429	0.269576	POLR2E
25.5345	25.4138	25.4488	25.317	-0.0911894	0.382068	NDUFV2
21.5165	21.5165	21.4972	21.3805	-0.077713	0.502521	TNFRSF1A
22.8191	22.7975	22.9985	22.8327	0.107306	0.484101	ERCC3
23.6971	23.5404	23.6865	23.6865	0.0677156	0.32003	TRIM21
25.4488	25.3975	25.5014	25.48	0.0675211	0.867114	EIF2AK2
22.8746	22.9225	22.9079	22.8746	-0.00729561	0.0829426	TFE3
27.0813	27.1214	26.965	26.9088	-0.164434	1.38415	SRM
22.1765	22.1015	22.3857	22.4451	0.276426	1.54335	SLC9A1
26.632	26.5653	26.6458	26.6181	0.0332928	0.342882	CSNK2A2
21.5731	21.5309	21.6453	21.5961	0.0686579	0.773646	RXRA
23.8191	24.1253	24.6264	24.0275	0.354754	0.395599	ITIH2
24.48	24.5105	24.5754	24.6431	0.113987	1.03808	NFKB1
18.6468	18.9517	18.6509	18.6668	-0.140381	0.342083	FST
26.7895	26.7895	26.7771	26.8019	-5.24521e-05	0.00129708	ATP2B1
28.55	28.7096	28.604	28.5898	-0.0329123	0.141948	EIF2S2
26.976	26.965	26.9088	26.8858	-0.0731716	1.53505	ANXA7
23.1222	23.019	23.0542	22.9847	-0.0511465	0.303304	TBP
27.3992	27.5165	27.524	27.4234	0.015871	0.0673726	BTF3
19.7832	19.6233	19.8912	19.6824	0.0835743	0.229139	RAB3A
25.3204	25.2643	25.2714	25.1908	-0.0612307	0.470188	RAB3B
25.0526	25.1214	25.1135	25.1253	0.0324144	0.345633	RAB4A
25.6486	25.9248	25.5725	25.5812	-0.209814	0.571481	RAB5A
26.5448	26.5551	26.5711	26.6595	0.0653448	0.553311	RAB6A
22.8073	22.6886	22.7695	22.6606	-0.0329247	0.141211	MSH3
27.1312	27.1984	27.2535	27.217	0.0704355	0.684971	PSMB1
26.8504	26.8142	26.8019	26.9316	0.0344296	0.180569	M6PR
26.0995	26.002	26.1527	25.6811	-0.133837	0.19778	COX5A
27.1795	27.2262	27.217	27.2262	0.0187368	0.289414	LMNB1
24.5165	26.2679	24.7441	24.4862	-0.77708	0.325538	PZP
26.2133	26.2058	26.2643	26.2926	0.0689077	1.37267	CAST
23.7286	23.9495	23.8576	23.976	0.0777302	0.223053	IMPDH1
22.7327	22.7856	22.8727	22.7013	0.0278616	0.10493	AGA
24.4362	24.4298	24.4862	24.4738	0.0469885	1.67523	RASA1
28.3494	28.362	28.3239	28.4433	0.0278835	0.162386	PTMS
23.9495	23.8385	24.002	23.8385	0.0262346	0.0885776	CDK11B
25.3745	25.4923	25.3745	25.5014	0.00457096	0.0165136	GSTM3
26.5898	26.5609	26.5522	26.604	0.00272179	0.0290683	ATP6V1B2
24.5869	24.5285	24.6264	24.5754	0.0432253	0.419067	ATP6V1C1
27.8564	28.0084	27.965	28.0965	0.0983515	0.365594	CSRP1
29.7437	29.893	29.9677	30.0737	0.202327	0.802399	FLNA
23.2679	23.2961	23.2961	23.3778	0.054986	0.479893	NF1
25.945	25.9406	25.9225	25.9672	0.00206375	0.0291313	ACO1
25.2096	24.9933	20.5853	19.8679	-4.87482	2.2325	TACR2
24.3712	24.2679	24.3307	24.4041	0.0478764	0.276791	SYT1
28.6458	28.9732	28.6697	29.0453	0.0479641	0.0629232	NT5E
22.3857	22.3348	22.3805	21.9098	-0.215174	0.337886	MDK
28.4551	28.4823	28.362	28.4707	-0.0523481	0.347978	VDAC1
25.5667	25.5195	25.6292	25.5463	0.0446167	0.348212	SDHB
26.7129	26.7771	26.9539	27.0296	0.246774	1.41914	CD9
23.7077	23.867	23.7389	23.8191	-0.00834179	0.0296475	BCKDHB
27.2535	27.3324	27.1795	27.2535	-0.0764751	0.533016	COMT
30.6964	30.9677	30.8004	31.0084	0.0722961	0.146629	TGM2
24.8764	24.8093	24.895	24.8904	0.0498571	0.558321	MMUT
25.0401	25.141	25.0854	25.1449	0.0245886	0.14538	OSBP
26.4122	26.5609	26.3975	26.5522	-0.011692	0.0347215	PCMT1
26.8858	26.9203	27.2353	27.189	0.309144	2.06406	FBL
26.2335	26.1719	26.3153	26.2151	0.0624943	0.398787	GART
27.6998	27.8081	27.8142	27.8564	0.0813761	0.528014	PAICS
22.1488	22.1426	22.0789	22.3184	0.0529375	0.15382	IDS
26.518	26.5754	26.4661	26.604	-0.0116987	0.0506456	SCP2
28.3787	28.49	28.4551	28.5278	0.0571222	0.318151	UBA1
29.0296	29.2262	29.57	29.4668	0.390531	1.14171	NME2
23.5404	23.5404	23.48	23.632	0.0156279	0.0674689	ENPP1
17.3398	17.1128	17.5791	17.9576	0.542088	0.874928	SPRR2A;SPRR2B;SPRR2D;SPRR2E;SPRR2F;SPRR2G
26.0359	23.8576	24.1253	23.8093	-0.979411	0.330303	FDXR
30.4919	30.6285	30.4433	30.4234	-0.126847	0.682863	HNRNPA2B1
22.6475	22.6929	22.7574	22.821	0.11904	1.03111	RFX1
23.2821	23.1946	23.2821	23.2679	0.0366249	0.305079	CBL
25.4769	25.4923	25.6431	25.5983	0.136093	1.53913	PRKACB
26.632	26.632	26.7517	26.7129	0.10033	1.45043	UQCRC2
23.976	23.9316	23.867	23.6649	-0.18779	0.675356	FECH
20.5165	20.5731	20.5545	20.654	0.0594435	0.389166	XPA
26.726	27.0609	26.518	26.8858	-0.191519	0.282544	FBLN1
25.4234	25.3645	25.5075	25.4892	0.10438	1.11202	TCEA1
25.5105	24.945	25.6237	24.8997	0.0338917	0.0232388	ITGA6
28.4938	28.4785	28.7325	28.611	0.185621	1.02844	SFPQ
24.8997	24.6971	24.9803	24.7796	0.0815649	0.20409	TUBG1
16.5149	20.6276	20.0691	19.0258	0.976233	0.160785	KEL
29.8887	30.1115	29.995	30.1724	0.0835886	0.209966	PPIB
24.2021	24.0443	19.5699	21.4923	-3.59211	1.18626	ANOS1
24.5812	24.4984	24.654	24.5345	0.0544586	0.274049	ME2
26.4122	26.4314	26.5433	26.5105	0.105134	1.50544	WARS1
29.6612	29.6441	29.843	29.7676	0.152646	1.23301	RPS3
24.7389	24.6703	24.7286	24.5165	-0.0820732	0.269144	GCSH
23.2081	23.2679	23.3778	23.5638	0.232872	0.853974	RPS6KB1
22.8249	22.741	22.8932	22.7369	0.0320692	0.123567	JAK1
20.6096	20.9672	20.8576	21.0951	0.187902	0.324563	PTPRB
22.4751	22.6649	22.5915	22.7265	0.0890045	0.280132	PTPRE
24.945	24.9672	24.9406	24.9628	-0.0044384	0.0947891	SP100
22.1174	21.7756	22.1395	22.0054	0.125931	0.248994	MCC
22.4144	22.4067	22.4775	22.4425	0.0494976	0.958695	NFYA
27.5463	27.509	27.6998	27.632	0.138243	1.15432	AHCY
31.225	31.3776	31.3303	31.4083	0.0679846	0.291843	CFL1
26.9088	26.976	26.976	26.8623	-0.0232706	0.120285	EIF4B
22.2821	22.3321	22.1612	22.3752	-0.0389204	0.120861	F8A3
25.3239	25.4831	25.3376	25.433	-0.0182009	0.0641691	ATP2B4
23.9043	23.9316	23.9584	23.9225	0.0225315	0.374032	DGKA
24.1174	24.2317	24.1095	24.1719	-0.0338793	0.184017	CPT2
26.3612	26.3844	26.4234	26.4202	0.0490103	1.27734	DTYMK
25.9781	25.8694	26.1075	25.7995	0.0297136	0.0592774	RRM1
20.4775	21.0359	17.8452	19.0527	-2.30775	1.1309	CMA1
18.3563	18.1689	18.2031	18.3654	0.0216169	0.0567012	PRTN3
24.5463	24.1946	24.9134	24.7129	0.442735	0.795254	COX7B
24.0275	24.2096	23.7389	23.8858	-0.306178	0.920239	CCND1
24.8811	24.6096	24.9495	24.8904	0.174579	0.47402	CHM
25.3778	26.1273	25.452	25.4041	-0.324544	0.320088	KDELR1
23.4425	24.0691	23.5869	23.3778	-0.273429	0.305591	NR2F2
29.4134	29.5296	29.389	29.4374	-0.0583296	0.344797	EEF1B2
27.0401	27.0711	27.1312	27.1214	0.0707111	1.30882	ATP5PB
21.9672	21.8113	22.3403	22.2185	0.390133	1.23133	IGFBP6
26.3101	26.2785	26.3066	26.2021	-0.0399504	0.267301	ACP1
26.5255	26.558	26.4692	26.4846	-0.0648661	1.16102	ACAT1
24.9134	24.945	24.9361	24.976	0.0267906	0.394814	TNC
29.7629	29.7958	29.5536	29.4668	-0.269083	1.54563	MYL9
22.7492	22.6276	22.8249	22.4898	-0.0309935	0.0565228	CCNC
24.989	24.9043	25.0359	24.9584	0.0504971	0.326023	POLR2A
24.5404	24.4425	24.7286	24.3101	0.0278769	0.0416009	CDK2
21.895	21.9882	22.0789	22.1143	0.154971	1.04762	GRK2
18.3215	17.7218	18.366	17.4133	-0.131984	0.0775754	ACKR3
22.4874	22.5309	22.4874	22.5404	0.00474644	0.0445233	F2R
25.7645	25.4707	25.9225	25.5165	0.101934	0.140541	MCM3
22.8404	22.7327	22.8746	22.85	0.0756989	0.5172	NFYB
24.8044	24.895	24.7492	24.9088	-0.0207005	0.0744122	MPST
29.1819	29.17	29.2647	29.2736	0.0932636	2.20117	RPS12
23.0707	22.9725	23.1174	23.0224	0.0483427	0.257561	BRD2
24.239	23.9043	24.1565	23.8764	-0.0551481	0.0840197	FAS
23.8764	23.632	23.7695	23.7796	0.0203218	0.0538823	YY1
26.8974	26.8741	26.8504	26.7517	-0.0846281	0.625262	DNAJB1
24.0526	24.239	24.1253	24.217	0.0253649	0.0810136	DNAJB2
29.0137	29.0634	29.1842	29.114	0.110527	0.906456	ATP5F1A
27.9595	27.9428	27.9977	27.9923	0.0438251	1.42316	PSMA1
27.0505	27.1015	27.0401	27.0401	-0.0359097	0.531238	PSMA2
27.7833	27.7895	27.8564	27.8682	0.07586	2.11505	PSMA3
27.4154	27.2714	27.4707	27.509	0.146461	0.725482	PSMA4
22.0886	21.8876	19.2317	19.0808	-2.83188	2.70687	NFKBIA
28.3536	28.6181	28.4234	28.6285	0.0401278	0.0794519	ITGA3
21.3699	21.2821	21.3101	21.391	0.0245762	0.14236	ITGB8
21.8802	21.7634	22.0088	21.7715	0.0683632	0.182683	PTX3
29.3239	29.4823	29.4453	29.4823	0.0607042	0.273012	MSN
26.0212	25.9694	26.038	26.038	0.0427294	0.61885	DDX6
24.4862	23.9847	24.5869	24.0275	0.0717869	0.0624384	DNMT1
20.714	20.6006	20.6096	19.9167	-0.39414	0.42219	PAX6
26.7645	26.8019	26.9539	26.9088	0.148196	1.43213	U2AF2
29.8667	29.9117	29.8974	29.8741	-0.0035038	0.0444988	RPL13
22.0224	21.9566	22.1916	21.8764	0.0445004	0.0924988	CHML
24.7234	24.7745	24.7024	24.7745	-0.0104923	0.078547	IVD
27.4707	26.1234	27.0711	27.3578	0.417429	0.217455	MGAT1
28.1795	28.1937	28.1842	28.1164	-0.0362406	0.392401	HMGB2
28.2847	28.4823	28.2262	28.3153	-0.112784	0.390076	PTBP1
26.976	26.976	27.0813	27.0609	0.0951204	1.94409	TARS1
26.4089	26.4073	26.4629	26.4567	0.0517111	2.41148	VARS1
30.0609	29.9677	30.1115	30.1361	0.10951	0.8215	EEF1G
27.0084	27.141	27.0505	27.2353	0.0682268	0.214989	FKBP2
25.1527	25.0975	25.1253	24.976	-0.0744247	0.348131	STOM
23.2535	23.6431	23.5045	23.6431	0.125481	0.217802	AK4
29.588	29.6268	29.6022	29.5916	-0.0105009	0.184567	YWHAQ
25.0443	24.9977	25.0105	25.0975	0.0330362	0.242577	MAPK3
22.6051	22.5754	22.6096	22.6606	0.0448341	0.572326	MARK3
24.4298	24.3031	24.5225	24.4105	0.100061	0.445851	ATP6V0C
29.4413	29.2602	29.6931	29.0164	0.00395393	0.00348026	CALML3
23.391	23.2535	23.1301	23.2243	-0.145042	0.649737	DPP4
20.5356	20.5356	20.5261	20.5261	-0.00952339	0	ARNT
28.9732	28.9174	29.1604	29.0839	0.176801	1.18801	RPL10
25.8834	26.1449	25.8069	26.0401	-0.0907011	0.182946	COL8A1
26.0914	26.0275	26.1488	25.9847	0.00727367	0.0260879	RPA1
27.3324	27.4551	27.3066	27.2262	-0.12739	0.648691	APEX1
24.654	24.6595	24.4551	24.3578	-0.250279	1.44523	CD82
24.7745	24.6649	24.8044	24.5926	-0.0212193	0.0579226	DCK
25.275	25.1871	25.391	25.239	0.0839758	0.356776	CAD
30.5844	30.5844	30.1361	30.4727	-0.280011	0.623433	CALR
29.0583	29.1214	29.1556	29.2285	0.102195	0.774207	MAP4
29.4093	29.5664	29.5536	29.6561	0.116999	0.470603	CANX
21.823	21.7265	21.9601	21.7389	0.0747852	0.222848	PIK3R1
25.9203	25.7619	26.0084	25.8764	0.101316	0.367344	PSMB8
23.9847	23.7182	24.019	23.7492	0.0326891	0.0560089	PSMB9
27.8916	28.003	27.9146	27.9146	-0.0327387	0.210146	PSMA5
27.17	27.1604	27.3239	27.341	0.167243	2.46736	PSMB4
27.604	27.6798	27.6251	27.6389	-0.00988674	0.0854463	PSMB6
27.4629	27.4938	27.4551	27.4629	-0.0193405	0.457998	PSMB5
25.4425	25.5075	25.3511	25.4488	-0.0750322	0.482385	GSTM2
24.9584	24.976	25.0317	25.1371	0.117246	0.797343	ABCD3
23.6209	23.4425	23.5165	23.417	-0.0649357	0.229217	ITPRID2
25.7363	25.976	25.7695	26.0041	0.030653	0.0595864	LOX
19.9601	17.6933	17.9639	18.1836	-0.752933	0.239226	CST5
26.0443	25.9473	26.0935	26.0526	0.0772543	0.553037	NDUFS1
26.6595	26.3562	26.7895	26.3393	0.0565834	0.068447	POLD1
22.8073	22.6209	22.8538	22.7856	0.105556	0.398946	TEAD1
24.8093	24.6918	24.8623	24.7234	0.0422935	0.162578	SMARCA1
26.0793	26.0854	26.2114	26.2114	0.129082	3.25462	MAPK1
23.1627	23.3239	23.3376	23.3645	0.107755	0.497516	GCA
22.7056	22.6929	22.8576	22.8576	0.15836	2.79407	RXRB
21.6276	21.5498	21.7756	21.6186	0.108407	0.466836	ERCC5
27.0711	27.1214	26.9869	27.1015	-0.052084	0.307267	GRN
22.0359	22.2273	22.1395	22.4726	0.174426	0.337514	PTPRM
24.9716	24.8717	25.0275	24.945	0.0646019	0.373118	LAP3
23.7389	23.654	23.7695	23.7286	0.0525684	0.419465	GTF2E1
22.7655	22.8557	23.3645	23.1206	0.431995	1.09746	GTF2E2
25.9066	26.3153	25.9361	26.0041	-0.140829	0.246589	TPP2
25.3545	25.4138	25.4266	25.4394	0.048871	0.604917	IMPA1
25.7441	25.9933	26.4984	26.604	0.682484	1.42993	CCN2
27.0401	27.141	27.0813	27.17	0.0350876	0.18475	EPHA2
24.7945	24.8623	24.8288	24.8717	0.0218611	0.193508	EPHB2
23.7995	23.7995	23.9134	23.9495	0.13199	1.74086	SHC1
25.3578	25.3975	25.3778	25.4457	0.0340691	0.321004	MPG
23.7492	23.5285	23.5869	23.5522	-0.0693102	0.223135	CRABP2
29.5014	29.7629	29.7113	29.9117	0.179348	0.408996	TKT
23.4298	23.5869	23.48	23.5869	0.0250931	0.0880815	CASP1
23.7182	24.0526	23.7695	24.2317	0.115228	0.13946	LMOD1
24.2096	24.1565	24.239	24.275	0.0739431	0.831695	RBMS1
25.3578	25.4676	25.2996	25.4008	-0.0625067	0.309364	PML
29.4842	29.509	29.5518	29.6441	0.101325	0.774538	EEF1D
29.2467	29.2714	29.461	29.3473	0.145086	0.885707	MARCKS
19.1318	22.4273	18.0099	22.6907	-0.429223	0.0483934	CNGA1
25.1332	25.1946	25.2643	25.2926	0.114553	1.11243	GNA11
23.119	23.1534	23.0443	23.1158	-0.0561743	0.533391	ALDH4A1
22.58	22.928	22.6006	22.6562	-0.125588	0.259737	PBLD
27.3578	27.2262	27.5609	27.3828	0.179841	0.60923	ERP29
28.5315	28.579	28.579	28.6764	0.0724611	0.504582	PRDX6
26.726	26.8504	26.7895	26.7895	0.00134087	0.00666776	BLVRB
27.7645	27.7833	27.8623	27.9316	0.12305	1.12169	PRDX5
27.632	27.5315	27.7645	27.8142	0.20759	1.18139	DDT
28.3153	28.267	28.4314	28.49	0.169586	1.33124	PRDX3
26.8974	26.7771	27.0813	27.0914	0.249172	1.26783	ATP5F1D
29.1288	29.3001	29.3724	29.2803	0.111937	0.43326	RPL12
26.6595	26.9088	26.8142	26.7645	0.00516605	0.0126558	ECHS1
26.8504	26.9088	26.9428	27.0401	0.111805	0.726781	CMPK1
28.5536	28.7227	28.7064	28.7581	0.0940609	0.39914	PEBP1
29.6527	29.9677	29.6475	29.8355	-0.0687141	0.12846	PDIA3
27.6458	27.6181	27.8264	27.7453	0.153926	1.15836	PPP2R1A
22.4375	22.2448	22.5662	22.4898	0.186862	0.671468	PPP2R1B
24.1642	24.2535	24.3031	24.1642	0.0248156	0.101224	CDC27
25.9998	25.9517	25.9803	25.9316	-0.0198145	0.206688	PPIF
25.0317	24.867	25.673	25.558	0.666154	1.65788	TM4SF1
21.1395	21.1519	21.2419	21.2302	0.0903873	2.05587	NKTR
25.8019	25.9043	26.002	26.0212	0.158458	1.03107	NMT1
24.7695	24.9225	24.9406	24.9225	0.0855227	0.417346	HMOX2
26.6181	26.6998	26.6595	26.6458	-0.00625896	0.0487939	ADSS2
24.0609	24.1565	24.1719	24.1871	0.0707827	0.55064	AXL
26.2445	26.4938	26.2891	26.509	0.0299273	0.0586312	LRPAP1
26.6865	26.6458	27.17	27.1984	0.518028	2.6418	TSPO
18.6698	19.1392	19.3259	19.4116	0.464246	0.718828	OXTR
25.9248	25.9406	25.8741	25.7821	-0.104598	0.811549	ADSL
17.8455	24.391	23.6649	22.8839	2.15619	0.236449	PKLR
27.5754	27.5389	27.5898	27.5609	0.0181913	0.28711	CLIP1
26.4953	26.4754	26.4877	26.5105	0.0137444	0.337005	SRI
23.3376	23.417	23.7695	23.3511	0.183031	0.3182	GSTT1
25.2058	25.3444	25.1833	25.3307	-0.0180759	0.0581701	SERPINB1
23.8093	23.7695	23.9316	23.8858	0.119254	1.22877	SLC7A1
24.945	24.8904	25.0148	25.0484	0.113886	1.14884	ALDH1B1
25.0443	24.9847	25.0894	24.9933	0.0269079	0.166858	POLR2B
26.0588	26.1075	26.0854	26.0629	-0.00899696	0.113973	SDHA
22.3592	22.1426	22.3184	22.2707	0.0436659	0.135631	CORO1A
26.3662	26.4008	26.3926	26.3187	-0.0278187	0.247355	GDI1
15.8359	18.6196	21.1143	20.3962	3.52752	0.874296	MAPK4
26.7129	26.6998	26.7517	26.7129	0.0259972	0.478434	MAT2A
22.1047	22.1269	20.9024	20.9672	-1.181	3.07604	PRKAR1B
22.8858	22.9459	22.7776	22.8576	-0.09828	0.724577	PRKAR2B
22.4196	22.3211	22.5869	22.5117	0.178966	0.992203	CPS1
22.8858	22.8689	22.6387	22.7533	-0.181375	1.05229	RRM2
22.5731	22.5404	22.4015	22.5451	-0.0834684	0.426285	SDC4
23.8385	23.9316	23.9847	24.019	0.116842	0.845468	TIA1
26.0588	26.1371	26.1234	26.0609	-0.00584316	0.0372408	DNAJA1
24.9271	24.9803	25.0526	25.1015	0.123348	1.1178	AKT1
23.2961	23.1472	23.4923	23.3511	0.200001	0.719982	AKT2
26.7129	26.673	26.6865	26.632	-0.0337496	0.374015	UQCRC1
25.2426	25.2571	25.1642	25.2317	-0.0519075	0.566497	HIBADH
27.019	26.9869	27.0711	27.0813	0.0732765	1.30824	ATIC
27.965	28.0137	28.1015	28.0401	0.0814381	0.76119	HNRNPH3
28.7581	28.7227	28.8324	28.7833	0.0674524	0.807788	HNRNPH1
28.9595	28.9732	28.9814	28.94	-0.0056448	0.0861471	YWHAB
28.2445	28.3066	28.3869	28.3828	0.109308	1.13981	STIP1
27.5754	27.5682	27.5389	27.4234	-0.0906487	0.588978	S100A11
29.7629	29.7373	29.837	30.0084	0.172576	0.733572	PRDX2
22.0723	21.7876	22.4651	22.3778	0.491526	1.09239	ARRB2
25.0732	25.1174	25.1984	25.2243	0.116053	1.341	DCTD
25.275	25.4769	25.4862	25.6676	0.200948	0.557605	PYCR1
21.5823	22.0951	21.5309	21.6714	-0.237549	0.331786	SLC8A1
25.0401	25.1371	25.1757	25.275	0.136731	0.726632	GBP1
21.3266	21.4425	18.7291	20.9601	-1.53995	0.520053	GBP2
20.8113	20.6006	21.1519	20.8727	0.306353	0.653778	ELF1
21.6453	21.5069	21.6843	21.6141	0.0731564	0.351419	GTF2H1
22.6649	22.6971	22.7675	22.7756	0.0905094	1.49506	STX2
16.4011	16.428	16.6234	16.8511	0.32273	0.973206	CTH
28.7613	28.9174	28.9088	28.8653	0.0477028	0.210596	RPL9P9
23.6431	23.6649	23.7182	23.6431	0.0266209	0.246947	ACSL1
26.1984	26.2188	26.2625	26.217	0.0311413	0.47068	KIF5B
24.317	24.4105	24.3578	24.3307	-0.0194826	0.138011	CSTF2
26.1293	25.8741	26.3187	25.8834	0.0994005	0.135712	DUT
25.0233	25.0732	24.9716	25.0935	-0.0156956	0.0789427	ABCC1
22.4898	21.4324	22.8365	21.7471	0.330736	0.151455	CKS2
22.867	23.0886	23.0224	23.1348	0.100776	0.298949	ABCD1
20.7955	20.7471	20.6186	20.0691	-0.427475	0.582799	MAN1A1
28.5682	28.4433	28.6424	28.5389	0.0848799	0.392476	KDELR2
25.6292	25.3612	25.7182	25.2961	0.0119448	0.014919	MCM4
25.341	25.1214	25.4707	25.0401	0.0242338	0.0318547	MCM5
25.4676	25.1449	25.5522	25.141	0.0403194	0.0498562	MCM7
22.5545	22.5141	22.538	22.6276	0.0484753	0.368861	GALNS
22.8651	23.2679	22.8269	23.1519	-0.0771112	0.100286	SDC2
23.9495	24.0609	23.9225	23.9933	-0.0472364	0.260916	CD68
23.7695	23.7492	23.8191	23.7182	0.00927734	0.0586943	SHMT1
27.5754	27.5826	27.726	27.611	0.0894938	0.58442	SHMT2
18.1123	17.9898	18.3031	18.3583	0.279646	1.27432	EVI2B
27.8623	27.8623	27.8142	27.8385	-0.0359716	1.01188	HSPA1L
29.0453	29.0375	29.0243	28.9869	-0.0358057	0.693931	HSPA4
19.9221	19.4949	20.1332	20.2419	0.479041	0.790899	GRK5
24.7129	24.9495	24.6431	24.9847	-0.0173378	0.0263666	MPI
24.141	24.0275	24.0609	23.9225	-0.0925694	0.387671	GPC1
28.0762	28.0965	27.976	27.9923	-0.102238	1.80191	PFN2
26.4862	26.6595	26.604	26.673	0.065691	0.25628	CTNNA1
25.7338	25.7895	25.9088	25.8528	0.119176	1.02374	CTNNB1
23.0393	22.7995	23.2434	23.0658	0.235215	0.592445	BMI1
21.4726	21.3376	21.4874	21.4015	0.0393457	0.172877	PCGF2
23.9847	21.8987	21.1015	18.7813	-3.00031	0.711399	NOS2
27.4154	28.0864	27.7645	28.189	0.225822	0.202845	PHB1
27.3066	27.3494	27.2077	27.3662	-0.041069	0.176199	SERPINB6
23.9933	24.0854	24.0609	24.002	-0.0079546	0.0469263	NF2
26.5255	26.604	26.6181	26.632	0.0602808	0.5694	RDX
25.7619	25.6209	25.8191	25.6944	0.0653744	0.252472	RPA3
25.8552	25.6403	26.0443	25.7024	0.125583	0.223739	RFC4
24.3307	24.1565	24.3578	24.0691	-0.0301838	0.0582768	RFC2
23.391	23.3101	23.4041	23.2066	-0.0452242	0.14695	RFC1
28.7581	28.8653	28.9002	29.0686	0.172709	0.646734	RPL22
24.6375	24.5404	24.6811	24.5926	0.0479059	0.266196	GTF2F1
24.4362	24.3844	24.3578	24.391	-0.0358915	0.439717	SPR
21.8727	21.7915	21.8113	22.0951	0.121064	0.302553	HRH1
25.2785	24.945	25.2426	19.7929	-2.59399	0.354282	MAS1L
22.0426	21.9847	22.2707	22.1612	0.202291	1.08414	CBS
26.673	29.4093	26.604	27.611	-0.93366	0.23101	KRT9
28.2353	29.0111	28.1263	28.9259	-0.0970774	0.0566588	FBN1
20.8269	20.2419	19.6031	18.6813	-1.39217	0.901515	FBN2
24.3239	23.8858	24.4676	24.317	0.287484	0.468002	IRS1
24.8576	24.895	24.8811	24.9225	0.0255079	0.339633	AGL
30.8682	31.1052	31.0609	31.13	0.108707	0.326551	MYH9
26.2996	26.2607	26.2926	26.2838	0.00806808	0.13952	MYH10
26.976	27.0401	27.0084	27.1214	0.0568609	0.324446	COPB2
25.5135	25.2243	25.48	25.3975	0.0698376	0.162443	SOAT1
25.4738	25.4738	25.3578	25.4073	-0.091259	1.17885	ADD1
28.5754	28.6764	28.4473	28.6251	-0.0897522	0.325529	BSG
27.5463	27.6458	27.5463	27.3828	-0.131517	0.518386	FUS
24.7543	24.7745	24.7846	24.7796	0.017643	0.633103	NUP214
26.5898	26.604	26.632	26.5419	-0.00995636	0.0718472	DEK
24.5522	24.6096	24.8191	24.6595	0.158394	0.692911	GLRX
20.9951	20.68	20.9459	20.9672	0.119008	0.276024	CHKA
24.0526	24.3511	24.2317	24.1565	-0.00773239	0.0156979	PPM1A
24.0443	24.0691	24.275	24.0443	0.102952	0.329293	AHR
27.5389	29.6814	28.3536	29.2308	0.182036	0.0508622	KRT2
24.4738	24.6703	24.4041	24.5225	-0.108788	0.353496	HMGCL
27.3992	27.3992	27.5165	27.4314	0.0747986	0.655798	PSMC2
23.1363	23.4041	23.5045	23.5285	0.246284	0.681227	SLC16A2
25.0935	25.0062	25.0772	24.918	-0.0522375	0.205407	ARL2
26.6458	27.0401	26.8264	26.8741	0.00728035	0.0114035	ARL3
25.5285	25.4676	25.8552	25.7363	0.297708	1.32979	MAP2K2
27.1604	27.0505	27.1312	27.0711	-0.00426865	0.0214279	ATP5F1C
25.8694	25.8788	25.9066	25.9088	0.0336275	1.69871	ATP6V1E1
25.9495	25.9134	26.0691	26.0422	0.124172	1.50467	CPOX
29.0531	29.1724	29.2736	29.2625	0.155334	0.913536	RPL4
24.4041	24.141	24.4105	24.239	0.0522289	0.112924	NUDT1
26.8858	26.965	26.9316	26.9428	0.0118036	0.0992039	LONP1
26.8623	27.0609	26.9316	27.0084	0.0083971	0.0248879	PGM1
25.4298	25.3545	25.4105	25.2463	-0.0637445	0.256771	PPP1CC
22.6736	22.4526	22.9334	22.7223	0.264759	0.647387	BMPR1A
21.7389	21.8651	21.6714	21.6714	-0.130615	0.758601	TGFBR1
24.2607	24.2679	24.2607	24.2891	0.0106335	0.264743	GNL1
23.9847	24.3645	24.2891	24.1871	0.0634899	0.109332	LTBR
23.211	22.7975	23.2155	23.0409	0.123946	0.196368	POLR2I
26.3844	26.2856	26.5255	26.4908	0.173125	1.09348	DLST
23.1332	23.2021	23.3645	23.3376	0.183395	1.41611	GMPR
24.0359	23.9043	23.848	23.8576	-0.117276	0.662466	GPX4
27.9372	28.0401	27.8081	27.9372	-0.116003	0.529975	SRP14
22.8519	22.8307	22.8746	22.9477	0.0698271	0.681769	TGFBR2
24.9977	25.1488	24.976	24.918	-0.126257	0.586443	NUP62
23.1363	17.5518	22.9742	18.855	0.570537	0.0532993	PPARG
27.5609	27.5463	27.524	27.5014	-0.0408764	1.029	HPCAL1
21.8538	22.0156	21.9707	22.0592	0.0802555	0.3224	FDFT1
20.0951	20.5261	20.4676	20.5261	0.186276	0.316963	ZEB1
30.1239	30.8157	30.2193	30.4134	-0.153476	0.14822	TAGLN2
28.4976	28.5463	28.6458	28.7227	0.162322	1.15245	TALDO1
27.9146	27.965	28.1312	28.1015	0.17659	1.57841	SNCA
26.3118	26.2909	26.3762	26.3629	0.0681677	1.50095	ETFB
28.17	28.0813	28.0401	27.976	-0.117617	0.783685	RBMX
24.0609	22.4298	22.8073	22.9352	-0.374076	0.159688	COIL
26.1681	26.329	26.2408	26.3528	0.0482607	0.173099	GGCX
25.4551	25.5045	25.2996	25.48	-0.0899715	0.35909	LIPA
26.6998	26.7645	26.7517	26.7771	0.0322981	0.346142	ATP6V1A
29.843	29.8294	29.9539	29.8324	0.0569983	0.347237	HSPA9
28.906	28.726	28.9896	28.7708	0.0641832	0.158081	EIF4A3
19.1736	19.9017	19.4876	19.2569	-0.1654	0.15048	IGHMBP2
22.58	22.3699	22.4996	22.2036	-0.123351	0.246502	CDKN1A
29.2353	29.2054	29.5315	29.4314	0.26109	1.42288	RPS19
28.9428	29.0914	29.2535	29.2625	0.240872	1.07713	RPL3
23.6431	23.5045	23.4425	23.48	-0.112493	0.588986	COL18A1
27.6798	27.6595	27.8385	27.9539	0.226572	1.21544	DDOST
27.5536	27.7771	27.6251	27.6998	-0.00293636	0.00772206	ANP32A
26.3629	26.1546	26.5725	26.2661	0.16057	0.321053	FEN1
23.4923	23.4425	23.5404	23.4923	0.0489244	0.533215	CUX1
19.0237	18.3682	18.9218	18.9282	0.229115	0.25423	CAPG
25.7945	25.8069	25.7796	25.8433	0.010726	0.112193	CAP2
18.2825	19.6814	19.9316	19.0244	0.496041	0.213111	ADCY8
25.4769	25.4457	25.5374	25.4234	0.0191154	0.109555	IL6ST
24.9495	24.8811	25.0317	24.9225	0.0618181	0.358045	TXLNA
28.0243	28.0864	28.019	28.0349	-0.0284119	0.329239	CCT6A
18.5087	18.2825	18.3687	18.5741	0.0758047	0.174607	MPL
23.2317	23.4298	23.2821	23.5522	0.0863552	0.182126	NNMT
23.8093	23.5045	23.7895	23.6865	0.0811176	0.177685	PSMB10
23.5045	23.5045	23.3511	23.3101	-0.173864	1.86529	VHL
20.4775	20.1079	20.4972	20.343	0.127366	0.229269	PBX1
20.2066	20.0691	20.2989	20.265	0.144141	0.747719	PBX2
16.848	16.9482	19.456	17.3525	1.50617	0.539302	PBX3
28.8741	28.9259	29.1507	29.1361	0.243436	1.92024	RPL13A
27.3662	27.4629	27.2445	27.4394	-0.0726662	0.24187	ARL1
22.2332	21.9423	22.3239	22.0723	0.110365	0.204899	MLH1
24.8093	24.9539	24.8433	24.9847	0.0323458	0.108226	STAT3
22.8746	22.9899	22.9566	22.8633	-0.022294	0.101192	USP8
22.7553	22.5189	22.9637	22.3376	0.0134888	0.0125537	PEX19
28.0137	28.1015	28.1652	28.2262	0.138083	0.910747	MDH1
28.7031	28.7581	28.9088	28.8682	0.157939	1.35782	MDH2
24.9225	24.6757	25.0148	24.7594	0.0879583	0.174288	RFC5
24.7945	24.5983	24.8904	24.604	0.0507822	0.0983108	RFC3
26.9428	26.965	26.976	26.9869	0.0275126	0.806969	HADHA
26.9428	27.0609	27.0813	27.141	0.109344	0.619546	EIF2S3
21.8152	21.2989	21.4526	21.3045	-0.178493	0.240609	ID1
23.9043	23.7594	23.6431	23.7492	-0.135697	0.568882	CETN2
21.4626	21.6186	21.5545	21.7512	0.112233	0.33194	ETV6
22.937	22.9423	23.0002	22.9243	0.0226307	0.213036	EIF2D
24.6918	24.632	24.5522	24.391	-0.190321	0.803555	WNT5A
23.9584	23.9134	23.8858	23.8191	-0.0834656	0.760618	BUD31
22.3294	22.4996	22.3988	22.4923	0.0310783	0.108325	UBA7
25.9066	25.9955	25.9111	25.8409	-0.0750303	0.499464	NAA10
23.8385	23.9225	23.848	23.867	-0.022954	0.188755	KDM5C
24.6811	24.7338	24.8044	24.8385	0.113997	1.16728	PPP1R2
24.5638	24.5522	24.5869	24.5225	-0.0032711	0.0317571	CSK
26.632	26.7517	26.7895	26.7129	0.0593615	0.308476	GARS1
27.965	27.9316	28.1312	28.1312	0.182961	2.08404	IARS1
20.4067	20.2185	20.5261	20.1206	0.010807	0.0150978	SLC19A1
26.391	26.2021	26.0338	25.945	-0.307131	1.00582	EIF1
23.8385	23.8858	24.0275	23.8385	0.0708637	0.265482	PRKCI
25.9495	25.9517	25.9694	25.8788	-0.0265236	0.209254	ACTR1B
24.8764	24.7695	24.8385	24.6865	-0.0605116	0.235281	ECI1
26.9316	26.8142	27.0914	26.8858	0.115713	0.365033	TMPO
25.3101	25.2926	25.3477	25.3101	0.0275488	0.500949	STAT1
24.4425	24.5045	24.4614	24.5983	0.0563641	0.274546	STAT6
24.8811	24.7182	24.9225	24.6649	-0.00591087	0.0120722	MTREX
22.1426	22.2736	22.0156	22.1673	-0.116603	0.438208	AKR1C3
23.8093	23.8576	23.9672	23.8858	0.0930376	0.725324	PIK3CA
22.0918	22.1015	22.1206	22.0854	0.00632	0.117869	PIK3CB
25.4234	25.4488	25.4425	25.452	0.0111265	0.302568	MTOR
23.0902	23.1395	23.119	23.1457	0.0175114	0.225108	PI4KA
27.7771	27.7771	27.8741	27.8019	0.0609484	0.6323	EPS15
25.2499	25.3239	25.3578	25.2353	0.00970554	0.0435801	CASP3
27.9146	28.066	28.0965	27.9923	0.0540915	0.21056	RPS27
21.6929	21.7098	21.8576	21.9916	0.223276	1.09351	ABL2
21.5823	21.7056	21.6843	21.6843	0.0403681	0.236834	HELZ
21.0625	20.0292	21.2419	19.8057	-0.0220251	0.00771261	NCAPD3
24.3645	24.3712	24.391	24.2821	-0.0313263	0.204899	RBM34
26.2679	26.2021	26.3066	26.1927	0.0146904	0.0736808	LRPPRC
24.8142	24.7895	24.8811	24.8623	0.0698252	1.33787	ACAA2
29.094	29.0243	29.3303	29.21	0.211022	1.02919	RPL35
24.9316	24.8191	25.2856	25.0894	0.312178	0.958762	CDKN2A
20.6971	20.5823	20.8576	20.5261	0.052125	0.0999978	CDKN2B
22.2792	22.1426	22.4676	22.0789	0.0623407	0.101944	CDKN2C
25.8552	25.6998	25.8457	25.9716	0.131146	0.494682	PRCP
26.8264	26.7895	26.7895	26.8142	-0.0060873	0.0918558	HTT
26.5478	26.6458	26.726	26.7517	0.142083	0.96972	ECE1
22.1612	22.1079	21.6886	22.0756	-0.25242	0.48752	SLC1A4
26.6181	26.6998	26.6458	26.7129	0.0204611	0.133121	PAFAH1B1
24.1174	23.7286	23.6649	23.7389	-0.221086	0.420038	CRAT
20.1457	20.3211	20.0951	20.4576	0.0429392	0.0701103	CTSO
23.654	23.5983	23.3239	23.48	-0.224234	0.943974	CTSK
27.0296	27.0914	27.0401	27.0505	-0.0152187	0.170448	MATR3
24.7846	24.632	24.7695	24.558	-0.0445271	0.11618	MSH2
20.9243	21.1269	20.9243	21.1015	-0.0127115	0.029956	GRK6
25.6209	25.5404	25.6513	25.6181	0.0540609	0.468223	GPD2
27.3066	27.2535	27.3239	27.4314	0.0975981	0.610579	SSR1
19.2581	19.2888	19.3278	19.253	0.0169449	0.145242	ALDH3B1
24.2535	24.1946	24.2021	24.1565	-0.044734	0.452818	PTPN9
27.5315	27.6527	27.7129	27.6458	0.0872974	0.475376	RANBP1
25.7995	25.8118	25.7995	25.7745	-0.0186081	0.505315	NAMPT
26.604	26.4738	26.7389	26.7129	0.187016	0.973687	PSMC4
24.7077	24.5983	24.7077	24.5983	0	0	TSFM
24.1642	24.3712	24.2607	24.4551	0.0902014	0.228978	PPIC
29.0813	29.027	29.1652	29.2512	0.154073	1.02701	VDAC2
24.7024	24.7077	24.7234	24.7645	0.0388851	0.69643	ACADSB
26.4008	26.1719	26.4785	26.2021	0.053937	0.101226	CBX5
27.3992	27.3324	27.3745	27.391	0.0169458	0.173424	USP5
23.1379	22.8442	22.8858	23.181	0.0423298	0.0666589	MAPK8
23.632	23.7286	23.654	23.7389	0.0161839	0.0836753	MAPK9
24.1095	24.2317	24.2317	24.3031	0.0968208	0.51607	MAP2K4
24.7182	23.6971	24.8904	23.48	-0.0224257	0.0079819	MKI67
24.5345	24.4676	23.9672	17.2118	-3.91152	0.435969	PHKA2
23.2961	23.2477	23.178	23.3101	-0.0278997	0.136685	PHKA1
25.7796	25.6811	25.9361	25.7363	0.105873	0.354567	RANGAP1
27.0401	26.9977	27.1507	27.0296	0.0712938	0.417623	RECQL
26.7517	26.6865	26.8385	26.7129	0.056592	0.294417	NOP2
18.467	18.0995	18.1628	19.0787	0.33752	0.248263	HTR3A
23.6209	23.654	23.7077	23.7077	0.0702209	1.28823	ATRX
25.2426	25.217	25.1833	25.2207	-0.0278263	0.462786	CRK
25.4008	25.4645	25.5135	25.4892	0.068718	0.741404	CRKL
23.5285	23.3239	23.7796	23.5522	0.239665	0.588961	MTIF2
24.9847	24.8997	24.9672	24.9225	0.00268745	0.0175219	BAG6
24.7945	24.8336	24.7024	24.7645	-0.0806513	0.798713	GSTM5
26.8741	26.8858	26.9088	26.9203	0.034627	1.28955	NSF
24.6757	24.5696	24.5404	24.7695	0.032259	0.0850217	CDKN1B
24.1795	24.2096	24.2096	24.2891	0.0548115	0.486237	MAP2K3
24.9361	24.848	25.0105	24.9933	0.109875	0.873201	BRCC3
29.3641	29.4551	29.6005	29.5071	0.144161	0.802628	RPL27A
28.726	28.8445	28.8534	28.7581	0.0205421	0.0902722	RPL5
28.2308	28.2847	28.8415	28.5826	0.454295	1.1235	RPL21
28.726	29.0914	28.7162	28.8445	-0.128382	0.239918	RPL28
28.9428	29.0609	29.2847	29.362	0.321544	1.34746	RPS9
29.0557	29.2891	29.3662	29.2123	0.116863	0.308814	RPS5
29.0084	29.0375	29.0349	29.027	0.00798035	0.187509	RPS10
26.4425	26.4598	26.4785	26.4346	0.00535202	0.0749439	MAP1B
26.7645	26.673	26.7645	26.6595	-0.00677299	0.0308863	GNPDA1
23.3645	23.417	23.4298	23.3778	0.0130596	0.120656	NEDD4
25.3307	25.4614	25.217	25.1565	-0.209312	0.996975	YAP1
25.7363	25.8069	25.7771	25.8167	0.0252552	0.224759	UTRN
28.4234	28.4976	28.4274	28.49	-0.0018158	0.0116409	IQGAP1
25.9562	25.945	25.8504	25.8457	-0.102549	2.46021	GYG1
26.8019	26.9203	26.7129	26.8623	-0.0734758	0.282945	STT3A
22.85	23.0105	22.8288	22.6907	-0.170469	0.604315	RABIF
24.2096	23.9316	24.1095	23.8858	-0.0729351	0.141279	PLA2G4A
28.4394	28.4707	28.341	28.4032	-0.0829439	0.852538	CAPZA2
28.267	28.3239	28.1507	28.2262	-0.106959	0.818305	CAPZB
26.4846	26.4877	26.673	26.4676	0.0841713	0.302203	EIF1AX
19.4214	19.8382	18.9342	19.6258	-0.349742	0.32088	OMP
27.0505	27.0296	27.141	27.0711	0.0660152	0.673499	ALDH1A3
26.3324	26.4089	26.4999	26.5754	0.16698	1.04655	QARS1
28.8829	28.8682	29.0813	29.019	0.174644	1.49545	RPL29
[truncated: 6,346 more rows]

## Sheet: Log2FC -Log10Pvalue for Volcano
Genes	Log2FC	-Log Student's T-test p-value Control_LLOMe30m
STAG3	5.29498	2.94022
LRCH2	5.08675	2.52812
KCNAB3	5.03653	1.00297
UGT2A1	4.94668	0.690566
OR2T7	4.79269	1.45583
YPEL1	4.54053	1.53959
C6orf132	4.49078	1.73584
CATSPERB	4.32394	0.528965
CABLES1	4.18026	1.90092
TAS1R2	4.11392	0.521202
KIAA0319	4.10195	1.75345
TMEM19	4.02558	1.86174
TRAV16	3.97969	2.21104
DUSP8	3.88302	1.37513
IFT57	3.87853	2.55538
ATP2B2	3.85432	1.99697
MUC17	3.75578	1.39627
CHD6	3.65414	0.391773
DALRD3	3.61532	3.59848
ACTR5	3.54713	0.755559
TASP1	3.53938	0.648132
MAPK4	3.52752	0.874296
SNX11	3.50766	2.26538
NEK4	3.44983	0.56907
FAM234B	3.37786	0.913802
ITIH4	3.36172	0.423586
NCR3	3.34278	1.59775
TTC6	3.33967	0.492542
UBB;UBC	3.27716	0.975304
TPST1	3.2768	2.17764
NLRP5	3.24776	1.68865
CXADR	3.23826	0.44879
OR5AS1	3.20987	1.48528
COX6A1	3.17633	1.30008
SMTNL1	3.14937	0.517543
CHRM3	3.09331	0.737565
LYST	3.09094	1.19766
TTN	3.08667	0.344958
ANKRD65	3.07757	0.471075
PIK3AP1	3.04359	0.89892
GRIP1	3.01389	0.674413
MOB3B	3.01203	1.19981
PIM1	2.99852	1.69838
FAM184A	2.97426	0.356633
SLC7A6OS	2.97377	0.358374
IKZF4	2.96115	0.248271
PLCXD2	2.95332	0.600712
	2.95095	1.192
ASAH2B	2.94489	1.15714
TTC7B	2.92287	1.52679
ICE2	2.90271	0.442228
FRK	2.87376	0.346312
AURKAIP1	2.85286	0.600729
SNX15	2.83519	0.837928
BNC2	2.79725	1.16527
ARL9	2.78394	1.12026
GK	2.77128	0.363496
SYT15B	2.76508	2.06609
IGHV4-34	2.72043	0.973832
MYBPH	2.71017	1.76764
CNIH3	2.67857	1.80224
CHRNA2	2.61983	1.07155
BEST1	2.614	0.326611
ADGB	2.61045	0.371044
FAM110D	2.59797	1.90061
IGIP	2.58825	0.735854
ATXN7L2	2.58699	0.750868
PER3	2.58313	1.02572
KLHL32	2.57795	0.999718
ARHGEF15	2.56079	0.334083
CIT	2.56069	0.325372
RBM41	2.55441	0.496944
PLEKHF1	2.55257	0.374603
MRS2	2.49913	0.418753
WNK3	2.49205	0.355667
TTC21A	2.48658	0.411804
RPL26L1	2.47948	4.01606
LAPTM4A	2.47871	0.412294
SERPINB3	2.46985	0.869363
RPIA	2.45959	0.402207
CDK10	2.45785	2.74432
HMBOX1	2.45503	0.42502
VPS13B	2.38025	0.438556
CCDC27	2.34698	1.54431
PRKCE	2.30103	0.307462
LRIG2	2.29987	0.400106
PIK3C2G	2.28913	2.12999
SETD1B	2.2887	0.543652
SNX31	2.28736	0.764838
KLHDC7A	2.2736	2.05155
EDEM1	2.26142	1.60492
MYH16	2.26034	0.338042
ERVK-16	2.25997	0.888277
TRANK1	2.23819	0.941348
AXIN1	2.22991	0.326566
SLC22A18	2.22897	0.684594
MAFG	2.22774	0.385449
PTGIS	2.20552	0.480972
SIGLECL1	2.18985	0.533739
NAF1	2.18241	1.33165
MOSPD2	2.17673	0.370741
NXT1	2.16473	0.261349
PKLR	2.15619	0.236449
IL17RB	2.1497	0.76061
TMEM225B	2.1367	0.225269
OR5G3	2.13406	2.15649
SLC25A28	2.13244	1.4012
TBX22	2.11915	1.20637
MLLT6	2.09919	0.728186
VWA7	2.04804	0.412003
LCE6A	2.04637	0.318862
TASOR2	2.03562	0.417553
DOCK4	2.02338	0.340499
LOC728743	2.01755	2.09363
PRC1	2.00674	0.445302
DIPK1C	1.98775	2.033
CLASRP	1.96395	0.389235
SLC25A51	1.94345	0.401845
KDM4F	1.92922	NaN
TRIM17	1.91786	0.276531
F13A1	1.90145	0.491724
B3GNT6	1.89805	0.413279
PLCE1	1.89785	0.384356
POLR3F	1.8874	0.362649
VPS9D1	1.88434	0.318537
C1orf74	1.88194	1.10066
ID2B	1.86676	0.770282
DRGX	1.86488	1.12312
NAA80	1.86058	0.584516
CRACD	1.85139	0.342736
CHD9	1.83854	0.474606
ZBED2	1.82927	0.705255
SPSB4	1.81961	1.22018
PGAP1	1.80899	0.44959
HEXIM2	1.79089	0.857181
OFCC1	1.78746	0.512463
KANK1	1.75507	0.319813
PKNOX1	1.74891	0.477076
ZNF691	1.74499	1.02446
CDRT4	1.74327	0.322237
FZR1	1.72428	0.456861
PPP2R5B	1.7197	0.287739
LAMC2	1.7166	0.31639
OR2W6P	1.71326	0.888592
MED26	1.69619	NaN
FLRT2	1.69259	0.258061
TNFRSF19	1.67759	2.0172
CLN3	1.67582	0.447139
COQ3	1.67298	0.419288
OR7G1	1.66432	1.25784
PNPLA5	1.66239	0.36269
LIN54	1.6594	0.791892
CCDC28B	1.65301	1.55157
OTOP2	1.64867	NaN
CMTM1	1.64195	0.359547
ZNF511	1.62659	0.360939
ANGEL2	1.61347	0.294333
C12orf56	1.61294	0.806403
KAT2A	1.60124	0.258269
TBX6	1.56401	NaN
TTLL4	1.53263	0.177551
ZNF362	1.53244	0.395136
ZFYVE28	1.53004	0.781203
ANKRD39	1.52957	0.599031
TLE4	1.52655	0.404866
TRIM45	1.50787	0.449379
PBX3	1.50617	0.539302
ZNF568	1.5027	0.724304
SPACA5B	1.50108	0.567078
FAM237B	1.48532	1.00627
LRR1	1.45775	2.1997
ZNHIT6	1.45298	0.342568
RNASEH1	1.45023	0.480472
FAM111A	1.44361	0.380964
FPGS	1.4429	0.384924
ZBTB8B	1.439	NaN
CECR2	1.43485	0.52093
VWA3A	1.43471	0.480344
ASTN2	1.43102	2.49315
ALB	1.42957	0.560844
	1.42743	0.641502
PCED1A	1.42179	2.02367
LDHAL6B	1.41452	0.0922386
CCNG2	1.41022	0.346867
SLC25A26	1.40944	0.320606
TRAF3IP2	1.40269	0.36042
PGLYRP3	1.40264	1.133
RGS1	1.3917	0.293988
TF	1.3884	1.03446
ACSL6	1.38572	0.359663
GCM2	1.38565	NaN
AFTPH	1.3826	0.439583
KIF7	1.38086	0.445122
CAMTA2	1.37742	0.914518
ANKRD11	1.35573	0.652558
AMY2B	1.35304	1.00311
CMSS1	1.34151	0.306563
IGKV2D-26	1.33987	0.339767
SENP5	1.33936	0.753512
ZIC2	1.33857	1.37921
FGD5	1.33146	2.72511
OGFOD1	1.33131	1.83839
DLGAP2	1.33112	0.277564
KRT37	1.32967	1.00684
RTL5	1.32669	0.65318
RAD17	1.31744	0.24448
GPD1	1.31213	0.183324
CTPS1	1.30848	2.02023
FIGLA	1.30806	1.12157
TSPAN2	1.30081	0.28059
PCDH11Y	1.29772	0.399528
CLEC1B	1.29632	0.636172
CINP	1.28737	0.719599
FBLL1	1.28712	0.549295
CEACAM16	1.25611	NaN
H2AC19;H2AC20	1.25603	NaN
PIGT	1.25412	0.992846
NUDT12	1.25166	0.592664
AFP	1.24355	0.435886
AGBL5	1.23635	0.39372
C11orf86	1.21751	0.474677
ALKBH8	1.21434	0.563199
MANEA	1.2051	0.425815
MFAP3	1.20428	0.367415
TEX19	1.19563	0.71328
MLLT3	1.18968	0.5497
FOXM1	1.18622	1.89415
KLB	1.18397	0.842979
SIDT2	1.18326	0.624797
LILRA1	1.18185	1.02588
MAB21L4	1.15629	0.377185
GPBP1L1	1.14991	0.453466
FOXR2	1.14722	0.722112
LPAR5	1.14523	0.205661
CADM2	1.1423	0.386219
PCDH18	1.14206	0.545125
ADCY4	1.14202	0.141915
PMS1	1.13763	0.873547
CMTM8	1.13527	0.187743
RETREG2	1.13359	0.38101
RPP14	1.12751	0.467745
AMACR	1.12739	0.441993
FAHD2B	1.12255	0.530485
TRIM64C	1.12144	0.192749
H3-3B	1.12123	1.11692
ASCL5	1.10483	0.445058
KAT5	1.10305	0.34939
FCRLA	1.10179	0.554917
AZIN1	1.10105	0.750898
RECQL5	1.09633	0.349799
METTL9	1.09553	0.415426
BPHL	1.09518	0.386516
OSGEPL1	1.0948	0.453976
PROKR2	1.09395	NaN
SCN9A	1.08804	0.583358
MRGPRX4	1.08686	0.427954
PIGR	1.08572	0.424548
FCHO1	1.08477	0.298072
VPS13D	1.08292	0.291277
RNF135	1.08164	0.483651
AIG1	1.08063	2.94983
NKX3-2	1.0801	0.505166
PACC1	1.07836	0.312885
PAPLN	1.07616	1.24519
UCP3	1.07444	1.64213
SLC6A17	1.07271	0.251142
POU6F2	1.07036	0.353798
EGR1	1.06837	1.61767
SERPING1	1.06768	0.460152
TPH2	1.06752	0.243647
S1PR3	1.06711	0.520516
DSG1	1.0663	0.171351
KRBOX4	1.0661	0.178954
SLITRK3	1.06375	1.45759
ANKS1B	1.06105	2.11982
FSIP1	1.05879	0.20112
MMADHC	1.05504	0.472404
C2orf88	1.03927	0.301515
EFNB1	1.03807	0.403277
SPTLC2	1.03618	0.459791
TSPAN10	1.03159	0.519967
ING5	1.02781	0.383413
DKK3	1.02765	1.70572
NRK	1.02466	0.58152
HPX	1.01451	2.48622
IL21	1.01114	0.352425
ADORA2A	1.00915	0.389527
GPR55	1.00623	NaN
ADCK1	1.00527	0.292585
CELSR2	1.00346	0.334631
ZNF208	1.00275	0.238707
ZNF738	0.997376	0.523173
TOR3A	0.987422	0.302307
ZNF558	0.986105	0.425615
IPCEF1	0.98512	1.63219
SLC4A9	0.983333	0.382613
TTC21B	0.983252	0.276354
IFNA14	0.980148	NaN
SETDB2	0.977207	0.284291
KEL	0.976233	0.160785
SIK2	0.974377	0.13022
PCDHGB1	0.968866	0.351268
OR4K13	0.968369	NaN
ZNF740	0.964711	1.60428
RAD51C	0.96	0.588825
CCNO	0.959074	0.40567
EPN3	0.956047	1.71802
ACSBG1	0.953418	0.272476
RAB3C	0.952332	0.61019
PARD6A	0.950477	0.374307
MED18	0.949809	0.303266
BRSK1	0.948081	0.244044
MAPK8IP3	0.946547	0.149496
GPR27	0.937454	0.125874
FEM1B	0.937432	0.896205
SPDYE10;SPDYE11;SPDYE13;SPDYE14;SPDYE15;SPDYE17;SPDYE8;SPDYE9	0.931235	0.661887
DTD2	0.929228	0.314412
SLC17A8	0.928926	0.215059
CD33	0.927632	0.444448
NHLH2	0.926765	NaN
ARSJ	0.92186	2.36482
	0.915502	NaN
CIDEC	0.908229	0.134507
GC	0.907886	0.454087
E2F4	0.90042	1.52101
KLK9	0.895865	0.242232
ZNF878	0.895195	1.24945
ZDHHC9	0.888429	1.95474
SPOP	0.887781	1.14494
PLXNB1	0.88373	0.159006
ZMYND19	0.883617	0.673121
MPV17L2	0.883554	1.03996
TOPBP1	0.875617	0.093176
JUNB	0.875348	2.69947
METTL1	0.875124	0.362695
DVL1	0.873999	0.996431
S100A7	0.873937	0.204691
CRX	0.872074	0.539753
CCDC190	0.870736	0.487346
TMEM132D	0.869936	0.737903
LDLRAD1	0.869865	NaN
DPY30	0.866904	0.205679
TTC39B	0.863987	0.361209
LINC02218	0.860064	0.249143
ST20-AS1	0.858864	1.81936
ATP2C2	0.858718	0.51266
KIFC3	0.8539	0.478352
SKA3	0.851391	0.167441
FGF19	0.849971	0.542247
ZNF836	0.849279	0.355816
PWWP2A	0.847888	1.12698
BBS9	0.846465	0.316888
CLUAP1	0.844287	0.465855
IGKV1-6	0.838476	0.191645
AREL1	0.837711	0.748169
LRRC7	0.832886	0.097797
	0.831761	0.171114
GARNL3	0.831559	0.264166
SULF1	0.827132	0.528047
TMEM233	0.824415	0.333768
H2BK1	0.823578	1.31966
ZNF581	0.822006	1.20378
SLC35B3	0.81678	0.281797
SLC6A8	0.814698	0.119439
WFDC3	0.806647	0.336237
POLR2D	0.806177	0.776329
TUBB1	0.804713	1.50609
CHTF8	0.802539	0.531495
DMBX1	0.801053	1.05193
TMEM220	0.80101	0.436801
OR11A1	0.79667	0.414054
CRY1	0.79645	0.195261
GMEB2	0.795217	1.23192
EFNB2	0.791008	1.70349
RRN3P2	0.789049	0.696059
CLK2	0.788345	0.393269
TRAV2	0.786736	0.256087
NSD1	0.782481	1.13192
SREBF1	0.780353	0.458399
RHOJ	0.778926	2.43945
PIWIL1	0.773723	0.370997
TAS2R5	0.773555	0.423124
KCTD2	0.772638	1.48642
KAT8	0.763542	0.28195
LINC01551	0.760864	NaN
HMGN2	0.756169	1.98451
TMOD2	0.751113	0.474273
PINX1	0.74933	0.384218
RTL6	0.748463	0.0787504
KDM1B	0.746415	0.472717
PHF20L1	0.745195	0.33124
WDR83	0.740943	1.4389
PRNT	0.736313	0.193657
JMJD7	0.73152	0.411145
HERPUD2	0.730186	1.08545
LGALSL	0.728752	0.361761
DRD2	0.728282	0.278985
AUNIP	0.727851	0.321283
FAM209A	0.727642	0.326598
FGB	0.724936	0.741471
TBC1D7	0.724302	0.808841
ZNF397	0.721607	0.580127
ENO3	0.721213	1.69107
FGGY	0.720878	0.575981
ANKRD1	0.719254	0.902893
SLC52A1	0.717368	NaN
HBE1	0.714422	0.393195
ZNF14	0.714325	0.222226
ATRNL1	0.712555	0.41296
WTIP	0.711184	1.15319
EEF1A2	0.70764	1.72156
TUBA3E	0.70737	1.65046
OR6C4	0.702123	0.184141
ESPL1	0.699778	NaN
LDHC	0.697585	1.04476
STYX	0.695856	0.233947
EIF4EBP2	0.68879	0.758534
STC2	0.687345	1.78068
NSRP1	0.683962	0.453487
[truncated: 7,926 more rows]

## Sheet: Not significant
Genes	Log2FC	-Log Student's T-test p-value Control_LLOMe30m
[truncated: 8,246 more rows]

[truncated: 2 more sheets: Significantly Up, Significantly Down]
