# Supplementary material for: Ubiquitination-activated TAB–TAK1–IKK–NF-κB axis modulates gene expression for cell survival in the lysosomal damage response
Source: bioRxiv preprint, doi:10.1101/2025.03.26.645624, version 2 (2025-07-31)
Supplement: Table S6 [file 645624_file07.xlsx]

## Sheet: Phospho peptides all data point
Sequence	Modifications	Master Protein Accessions	Master Protein Descriptions	Abundance Ratio: (2_LLOMe5min) / (1_Control)	Abundance Ratio: (3_LLOMe30min) / (1_Control)	Abundance Ratio: (4_HS276) / (1_Control)	Abundance Ratio: (5_HS276_LLOMe5min) / (1_Control)	Abundance Ratio: (6_HS276_LLOMe30min) / (1_Control)	Abundance Ratio: (5_HS276_LLOMe5min) / (2_LLOMe5min)	Abundance Ratio: (6_HS276_LLOMe30min) / (3_LLOMe30min)	Abundance Ratio: (5_HS276_LLOMe5min) / (4_HS276)	Abundance Ratio: (6_HS276_LLOMe30min) / (4_HS276)	Abundance Ratio (log2): (2_LLOMe5min) / (1_Control)	Abundance Ratio (log2): (3_LLOMe30min) / (1_Control)	Abundance Ratio (log2): (4_HS276) / (1_Control)	Abundance Ratio (log2): (5_HS276_LLOMe5min) / (1_Control)	Abundance Ratio (log2): (6_HS276_LLOMe30min) / (1_Control)	Abundance Ratio (log2): (5_HS276_LLOMe5min) / (2_LLOMe5min)	Abundance Ratio (log2): (6_HS276_LLOMe30min) / (3_LLOMe30min)	Abundance Ratio (log2): (5_HS276_LLOMe5min) / (4_HS276)	Abundance Ratio (log2): (6_HS276_LLOMe30min) / (4_HS276)	Abundance Ratio P-Value: (2_LLOMe5min) / (1_Control)	Abundance Ratio P-Value: (3_LLOMe30min) / (1_Control)	Abundance Ratio P-Value: (4_HS276) / (1_Control)	Abundance Ratio P-Value: (5_HS276_LLOMe5min) / (1_Control)	Abundance Ratio P-Value: (6_HS276_LLOMe30min) / (1_Control)	Abundance Ratio P-Value: (5_HS276_LLOMe5min) / (2_LLOMe5min)	Abundance Ratio P-Value: (6_HS276_LLOMe30min) / (3_LLOMe30min)	Abundance Ratio P-Value: (5_HS276_LLOMe5min) / (4_HS276)	Abundance Ratio P-Value: (6_HS276_LLOMe30min) / (4_HS276)	Abundances (Grouped): 1_Control	Abundances (Grouped): 2_LLOMe5min	Abundances (Grouped): 3_LLOMe30min	Abundances (Grouped): 4_HS276	Abundances (Grouped): 5_HS276_LLOMe5min	Abundances (Grouped): 6_HS276_LLOMe30min	Abundances (Grouped) CV [%]: 1_Control	Abundances (Grouped) CV [%]: 2_LLOMe5min	Abundances (Grouped) CV [%]: 3_LLOMe30min	Abundances (Grouped) CV [%]: 4_HS276	Abundances (Grouped) CV [%]: 5_HS276_LLOMe5min	Abundances (Grouped) CV [%]: 6_HS276_LLOMe30min	Abundances (Scaled): F23: Sample, 1_Control	Abundances (Scaled): F24: Sample, 1_Control	Abundances (Scaled): F25: Sample, 1_Control	Abundances (Scaled): F26: Sample, 2_LLOMe5min	Abundances (Scaled): F27: Sample, 2_LLOMe5min	Abundances (Scaled): F28: Sample, 2_LLOMe5min	Abundances (Scaled): F29: Sample, 3_LLOMe30min
TNGITYASVALATSK	1xPhospho [T/Y]	P35670	Copper-transporting ATPase 2 OS=Homo sapiens OX=9606 GN=ATP7B PE=1 SV=4	1.354	0.002	0.897	0.955	0.552	0.706	302.46	1.065	0.615	0.44	-9.1	-0.16	-0.07	-0.86	-0.5	8.24	0.09	-0.7	1	0.560193	1	0.999789	0.999999	0.999398	0.609297	0.999532	0.999993	126	170.6	0.2	113.1	120.4	69.6	89.7	86.5	98.42	86.23	86.64	87.36	0.2	244.9	177.9	0.2	240.9	248.3	0.3
KGSVVNVNPTNTRPQSDTPEIR	1xPhospho [S3]	O95819	Mitogen-activated protein kinase kinase kinase kinase 4 OS=Homo sapiens OX=9606 GN=MAP4K4 PE=1 SV=2	1.09	0.003	0.035	0.042	0.03	0.038	11.75	1.195	0.853	0.12	-8.62	-4.84	-4.58	-5.07	-4.7	3.55	0.26	-0.23	0.999988	0.348867	0.997079	0.994167	0.90235	0.998742	0.880869	1	0.991238	272.8	297.4	0.7	9.5	11.4	8.1	87.82	85.98	109.65	158.27	157.08	163.71	318.1	2.9	239.5	1.3	261.1	267.9	3.1
REPGGWGAGASAPVEDDSDAETYGEENDEQGNYSK	1xPhospho [S/T/Y]	Q9NQS1	Cell death regulator Aven OS=Homo sapiens OX=9606 GN=AVEN PE=1 SV=1	0.955	0.003	0.003	1.098	0.952	1.15	320.494	434.131	376.183	-0.07	-8.4	-8.63	0.14	-0.07	0.2	8.32	8.76	8.56	0.967587	0.085113	0.0211968	1	1	0.956044	0.0947999	0.0191766	0.0237042	149.6	142.9	0.4	0.4	164.3	142.4	29.09	85.4	171.02	145.25	33.46	19.99	110.8	199.3	148	188.9	5	141.4	86.3
KTGSYGALAEITASK	1xPhospho [S/T/Y]	O14974	Protein phosphatase 1 regulatory subunit 12A OS=Homo sapiens OX=9606 GN=PPP1R12A PE=1 SV=1	1.354	0.003	0.897	0.994	0.77	0.734	242.423	1.108	0.858	0.44	-8.3	-0.16	-0.01	-0.38	-0.45	7.92	0.15	-0.22	1	0.41849	0.999997	1	0.995869	1	0.217506	0.999999	0.989602	119.6	161.9	0.4	107.3	118.8	92	89.42	86.48	72.69	86.21	87.77	57.2	0.6	223.3	162.2	0.3	219.6	226.4	0.6
KASVVDPSTESSPAPQEGSEQPASPASPLSSR	1xDeamidated [Q]; 1xPhospho [S]	Q66K14	TBC1 domain family member 9B OS=Homo sapiens OX=9606 GN=TBC1D9B PE=1 SV=3	0.043	0.004	0.66	0.168	0.859	3.924	243.888	0.254	1.302	-4.55	-8.15	-0.6	-2.58	-0.22	1.97	7.93	-1.97	0.38	0.289732	0.341048	0.999999	0.998594	1	0.471928	0.323609	0.99963	0.999992	219.5	9.4	0.8	144.8	36.8	188.6	69.96	111.39	171.58	68.31	99.43	57.18	234.1	31.8	229.6	0.1	27.3	9.8	164.5
RGSSGSVDETLFALPAASEPVIR	1xPhospho [S]	Q9NQC3	Reticulon-4 OS=Homo sapiens OX=9606 GN=RTN4 PE=1 SV=2	0.072	0.004	0.033	0.043	0.033	0.599	8.611	1.297	1.005	-3.8	-8.01	-4.91	-4.54	-4.91	-0.74	3.11	0.38	0.01	1	0.365272	0.999157	0.916676	0.999665	0.901595	0.513022	0.986259	1	506.2	36.4	2	16.8	21.8	16.9	86.05	143.34	119.06	163.43	50.65	164.89	1.2	284.1	284.1	19.6	308.2	20.4	5.8
TLTEPSVDFNHSDDFTPISTVQK	1xPhospho [T3]	Q6R327	Rapamycin-insensitive companion of mTOR OS=Homo sapiens OX=9606 GN=RICTOR PE=1 SV=1	0.394	0.004	0.711	0.07	0.03	0.176	7.223	0.098	0.042	-1.34	-7.92	-0.49	-3.85	-5.07	-2.5	2.85	-3.35	-4.58	0.999898	0.0609963	0.967092	0.782872	0.409648	0.66	0.795907	0.363246	0.136346	271.6	107.1	1.1	193.1	18.9	8.1	82.98	44.82	151.3	7.17	134.43	34.79	296.4	287.5	8.3	72.9	113.3	181.6	19.6
LGPQNFIDETSDIENLLKEEEDYKEENNDSK	1xPhospho [S/T]	Q14692	Ribosome biogenesis protein BMS1 homolog OS=Homo sapiens OX=9606 GN=BMS1 PE=1 SV=1	0.025	0.005	0.035	0.085	0.082	3.394	16.917	2.405	2.334	-5.33	-7.69	-4.83	-3.56	-3.61	1.76	4.08	1.27	1.22	0.24585	0.108225	0.756094	0.958857	0.949349	0.64927	0.380693	0.993769	0.995792	487.1	12.1	2.4	17.1	41.2	40	85.14	63.03	91.65	160.7	148.3	105.63	483.9	364.1	13.5	10.3	9.1	2	1.8
YPPGIVGVAPGGLPAAMEGIIPGGIPVTHNLPTVAHPSQAPSPNQPTK	1xPhospho [S/T]	P56545	C-terminal-binding protein 2 OS=Homo sapiens OX=9606 GN=CTBP2 PE=1 SV=1	0.004	0.008	0.004	0.161	0.158	44.2	20.179	45.132	44.384	-8.1	-6.99	-8.13	-2.64	-2.66	5.47	4.33	5.5	5.47	0.994956	0.999996	0.990312	0.999939	0.999958	0.977272	0.999556	0.96475	0.967475	449.7	1.6	3.5	1.6	72.4	71.2	86.67	165.9	169.63	168.36	141.52	101.04	361.8	0	344.7	0.7	67.1	1.3	311.8
TEAPAPASSTPQEPWPGPTAPSPTSRPPWAVDPAFAER	1xDeamidated [Q12]; 1xPhospho [S/T]	Q9NR12	PDZ and LIM domain protein 7 OS=Homo sapiens OX=9606 GN=PDLIM7 PE=1 SV=1	3.449	0.009	1.314	0.013	0.007	0.004	0.718	0.01	0.005	1.79	-6.73	0.39	-6.32	-7.2	-8.1	-0.48	-6.71	-7.6	0.779413	0.407979	1	0.630498	0.932357	0.111497	0.891766	0.616128	0.925093	103.6	357.3	1	136.1	1.3	0.7	91.56	40.87	98.84	87.24	37.69	172.23	98.9	154.2	1	179.7	438.3	341	2.2
GLNPDGTPALSTLGGFSPASKPSSPR	2xPhospho [S/T]	Q9UK58	Cyclin-L1 OS=Homo sapiens OX=9606 GN=CCNL1 PE=1 SV=1	0.825	0.01	0.876	0.977	0.099	1.184	9.5	1.115	0.113	-0.28	-6.59	-0.19	-0.03	-3.34	0.24	3.25	0.16	-3.15	0.895115	0.0392775	0.935964	0.999958	0.450015	0.9508	0.60786	0.974924	0.915574	158.4	130.7	1.6	138.8	154.8	15.6	30.87	76.84	163.44	76.24	17.98	88.97	258	165.1	149	11	143.3	136.3	1.7
VKPAPLEIKPLPEWEELQAPVRSPITR	1xPhospho [S23]	Q13480	GRB2-associated-binding protein 1 OS=Homo sapiens OX=9606 GN=GAB1 PE=1 SV=2	0.082	0.011	0.029	0.043	0.088	0.522	8.392	1.501	3.084	-3.6	-6.57	-5.12	-4.54	-3.5	-0.94	3.07	0.59	1.62	0.736274	0.115532	0.232018	0.545835	0.704271	0.999275	0.722057	0.981438	0.924111	478.8	39.5	5	13.7	20.6	42.3	95.8	35.88	137.41	103.74	28.8	52.63	904.3	10.3	486.1	40.1	47.8	22.1	5.1
QLGDFFGMSNSYAECYPATMDDMAVDSDEEVDYSK	1xDeamidated [N/Q]; 1xCarbamidomethyl [C15]; 1xPhospho [S27]	Q13123	Protein Red OS=Homo sapiens OX=9606 GN=IK PE=1 SV=3	0.752	0.011	0.8	0.1	1.247	0.133	117.864	0.125	1.558	-0.41	-6.56	-0.32	-3.32	0.32	-2.91	6.88	-3	0.64	1	0.70282	0.999722	0.999721	0.925753	0.999365	0.232987	0.992496	0.981842	153.5	115.4	1.6	122.8	15.4	191.3	97.21	85.36	166.06	71.22	137.51	5.92	278.6	2.1	146	160.4	6.1	109.8	1
GDAVANHVPAGWPDQSLAESDSEDPSGKPR	1xPhospho [S]	Q9NYQ6	Cadherin EGF LAG seven-pass G-type receptor 1 OS=Homo sapiens OX=9606 GN=CELSR1 PE=1 SV=1	0.578	0.011	0.053	0.131	0.987	0.226	92.811	2.481	18.749	-0.79	-6.55	-4.25	-2.94	-0.02	-2.14	6.54	1.31	4.23	0.999905	0.261524	0.569889	0.955813	1	0.988252	0.258484	0.952609	0.565176	217.5	125.6	2.3	11.5	28.4	214.7	104.19	95.1	139.02	9.95	160.89	88.65	10.1	387.4	151.4	13.1	205.6	87.4	1.6
LLHEDLDESDDDMDEKLQPSPNRR	1xPhospho [S9]	O43150	Arf-GAP with SH3 domain, ANK repeat and PH domain-containing protein 2 OS=Homo sapiens OX=9606 GN=ASAP2 PE=1 SV=3	0.354	0.011	0.638	0.32	1.112	0.904	103.983	0.501	1.743	-1.5	-6.55	-0.65	-1.64	0.15	-0.15	6.7	-1	0.8	1	0.874058	0.988789	0.999997	0.999056	0.999991	0.69891	0.995479	0.999833	174.7	61.8	1.9	111.5	55.9	194.3	86	73.51	167.53	27.43	95.95	82.35	225.9	1.7	202.3	10.1	91.5	71.6	2.2
GDSLILEHQWELEKLELLHEVEK	1xPhospho [S3]	O60333	Kinesin-like protein KIF1B OS=Homo sapiens OX=9606 GN=KIF1B PE=1 SV=5	0.862	0.011	0.056	0.98	0.794	1.137	72.622	17.568	14.219	-0.21	-6.52	-4.16	-0.03	-0.33	0.19	6.18	4.13	3.83	0.984654	0.234879	0.917243	0.999999	0.999921	0.991793	0.316534	0.887831	0.969007	162	139.7	1.8	9	158.9	128.6	82.09	30.26	89.69	157.37	85.83	87.79	163.9	200.4	8.4	141.3	210.2	119.2	1.8
IPESETESTASAPNSPR	2xPhospho [S11; S15]	Q07889	Son of sevenless homolog 1 OS=Homo sapiens OX=9606 GN=SOS1 PE=1 SV=1	0.396	0.012	0.689	0.656	0.228	1.657	18.746	0.953	0.331	-1.34	-6.36	-0.54	-0.61	-2.13	0.73	4.23	-0.07	-1.59	0.897682	0.015591	0.941	0.943022	0.578681	0.999987	0.233622	1	0.968107	201.3	79.7	2.4	138.6	132.1	45.9	24.26	41.98	160.01	50.34	51.37	45.2	152.6	199.3	249.9	78.9	61.5	135.3	2.4
DKPSVEPVEEYDYEDLKESSNSVSNHQLSGFDQAR	1xPhospho [S]	Q9Y450	HBS1-like protein OS=Homo sapiens OX=9606 GN=HBS1L PE=1 SV=1	0.551	0.014	0.787	0.519	0.01	0.943	0.749	0.66	0.013	-0.86	-6.19	-0.35	-0.95	-6.61	-0.09	-0.42	-0.6	-6.26	0.0119477	4.30434e-09	0.81149	0.131497	1.38613e-09	0.704393	0.422876	0.653092	2.85615e-09	208.3	114.7	2.9	163.9	108.1	2.1	18.57	45.99	16.45	6.02	11.35	24.46	266.7	210.5	186.7	116.7	115.9	43.1	2.9
SSSLDALDADSEGEGHSEPSHICYTPGSQSSSR	1xPhospho [S]; 1xCarbamidomethyl [C23]; 1xDeamidated [Q29]	Q8N1W1	Rho guanine nucleotide exchange factor 28 OS=Homo sapiens OX=9606 GN=ARHGEF28 PE=1 SV=3	1.593	0.014	1.765	1.338	2.493	0.84	181.796	0.758	1.413	0.67	-6.19	0.82	0.42	1.32	-0.25	7.51	-0.4	0.5	0.999459	0.818038	0.891195	0.999131	0.805444	1	0.206899	0.97803	0.999945	73.2	116.5	1	129.1	97.8	182.4	86.17	98.42	165.99	15.74	86.67	49.01	1.9	100.4	76.4	121.7	242.7	2.2	1
EYGSQEGKHDYDDSSEEQSAEDSYEASPGSETQR	1xPhospho [S/Y]; 1xDeamidated [Q]	P98175	RNA-binding protein 10 OS=Homo sapiens OX=9606 GN=RBM10 PE=1 SV=3	0.568	0.014	1.113	0.786	0.683	1.386	48.686	0.706	0.613	-0.82	-6.16	0.16	-0.35	-0.55	0.47	5.61	-0.5	-0.71	0.999964	0.32688	0.998915	0.999942	1	0.998658	0.311233	0.991614	0.998288	144.1	81.8	2	160.4	113.3	98.4	77.78	46.25	168.52	85.76	3.73	22.71	146	22.3	223.9	82.9	111.5	39.8	2
TASIKPEVALLDTQDMENMSDDDGWEFVNLGDQQSFGIK	3xDeamidated [Q14; N18; N29]; 1xPhospho [S20]	O00410	Importin-5 OS=Homo sapiens OX=9606 GN=IPO5 PE=1 SV=4	0.029	0.014	0.088	0.802	0.036	27.198	2.539	9.087	0.408	-5.08	-6.14	-3.5	-0.32	-4.79	4.77	1.34	3.18	-1.29	0.146093	0.144945	0.496077	0.999999	0.434654	0.165996	0.965276	0.542098	0.999996	304.5	9	4.3	26.9	244.3	11	38.34	88.04	159.51	140.15	23.96	156.6	302.1	232.9	132.5	4.2	6.9	22.3	2
LASVLLYSDYGIGEVPVEPLDVPLPSTIRPASPVAGSPK	1xPhospho [S/T]	Q13057	Bifunctional coenzyme A synthase OS=Homo sapiens OX=9606 GN=COASY PE=1 SV=4	0.018	0.016	0.023	0.008	0.026	0.435	1.646	0.332	1.117	-5.81	-5.99	-5.43	-7.01	-5.27	-1.2	0.72	-1.59	0.16	0.000580456	0.0025906	0.00125487	0.000163592	0.00103842	0.943184	0.990286	0.730459	0.999995	550.2	9.8	8.7	12.8	4.3	14.3	16.01	58.59	140.81	34.48	68.57	51.3	556.7	595.2	433.3	13.8	3.3	9.9	4.3
TYEQGPDTPVSADAPVHPPALEQHPYEHCEPSTMPGDLGLGLR	1xPhospho [T8]; 1xDeamidated [Q23]; 1xCarbamidomethyl [C29]	Q01433	AMP deaminase 2 OS=Homo sapiens OX=9606 GN=AMPD2 PE=1 SV=3	0.056	0.016	0.077	0.08	0.011	1.422	0.702	1.033	0.144	-4.15	-5.98	-3.69	-3.65	-6.49	0.51	-0.51	0.05	-2.8	0.74201	0.160832	0.389156	0.443423	0.124122	0.99354	0.999977	0.999997	0.963806	483.7	27.2	7.6	37.4	38.6	5.4	18.51	157.39	115.53	162.09	34.22	105.96	338.1	250.6	247.1	377	14.1	10.4	4
MLQDDDDTVHLPFEGGSLLQIPVK	2xPhospho [T8; S17]	Q9Y6M7	Sodium bicarbonate cotransporter 3 OS=Homo sapiens OX=9606 GN=SLC4A7 PE=1 SV=2	0.077	0.017	0.022	0.052	0.086	0.677	5.189	2.379	3.892	-3.69	-5.92	-5.51	-4.25	-3.55	-0.56	2.38	1.25	1.96	0.38451	0.109485	0.326847	0.245115	0.109676	0.999299	1	0.99993	0.973623	478.5	37	7.9	10.5	25.1	41	24.4	147.73	100.82	155.45	14.91	83.61	465.6	364	284.8	276.2	2.6	28.2	27
KETSFGSSENITMTSLSK	1xPhospho [S/T]	Q9UMZ2	Synergin gamma OS=Homo sapiens OX=9606 GN=SYNRG PE=1 SV=2	0.727	0.017	1.232	1.27	0.129	1.747	7.745	1.031	0.105	-0.46	-5.91	0.3	0.35	-2.95	0.8	2.95	0.04	-3.25	0.891215	0.97949	0.799861	0.663693	0.999955	0.996709	0.943975	0.99982	0.883922	137.1	99.7	2.3	168.9	174.2	17.7	86.54	62.39	149.54	65.33	20.67	131.33	148.1	157.2	0.2	107.7	36.4	164.5	1.8
EKTIASDSEEEAGKELSDKK	2xPhospho [S6; S8]	Q96ST2	Protein IWS1 homolog OS=Homo sapiens OX=9606 GN=IWS1 PE=1 SV=2	0.363	0.017	0.851	0.849	0.219	2.34	13.044	0.997	0.258	-1.46	-5.89	-0.23	-0.24	-2.19	1.23	3.71	0	-1.96	0.850696	0.0198904	0.994452	0.999069	0.792965	0.962503	0.162653	0.999979	0.969687	181.9	66	3.1	154.8	154.4	39.9	26.74	82.86	150.87	55.08	47.01	97.39	114.8	185.3	196.5	157.5	67.2	23.2	51.5
TQSSASLAASYAAQQHPQAAASYR	1xDeamidated [Q]; 2xPhospho [S3; S4]	Q96PK6	RNA-binding protein 14 OS=Homo sapiens OX=9606 GN=RBM14 PE=1 SV=2	0.699	0.017	0.214	0.337	0.705	0.483	41.091	1.574	3.292	-0.52	-5.86	-2.22	-1.57	-0.5	-1.05	5.36	0.65	1.72	0.979396	0.0320609	0.893197	0.574873	0.987524	0.917459	0.0897266	0.987157	0.997675	201.8	141	3.5	43.2	68.1	142.4	1.86	66.52	115.23	121.57	119.34	51.22	184	189.8	183.6	128.5	28.7	169.5	3.2
KKSSSDPGIPGGPQAIPATNSPDHSDHTLSVSSDSGHSTASAR	1xPhospho [S]; 1xDeamidated [N/Q]	Q68CZ2	Tensin-3 OS=Homo sapiens OX=9606 GN=TNS3 PE=1 SV=2	0.768	0.018	0.912	0.824	1.24	1.073	70.712	0.903	1.359	-0.38	-5.83	-0.13	-0.28	0.31	0.1	6.14	-0.15	0.44	1	0.892857	0.974636	0.999999	0.927713	1	0.401415	0.961031	0.999919	126	96.7	2.2	114.9	103.8	156.3	100.35	85.28	165.59	10.32	83.47	9.98	1.4	128.2	265.8	98.4	126.8	3	2.2
SAEPSPTVMSTSLGSNLSELDR	1xPhospho [S/T]	P49023	Paxillin OS=Homo sapiens OX=9606 GN=PXN PE=1 SV=3	0.9	0.018	0.646	0.551	0.039	0.612	2.231	0.853	0.061	-0.15	-5.83	-0.63	-0.86	-4.67	-0.71	1.16	-0.23	-4.04	0.999984	0.181963	0.736184	0.87015	0.312966	0.924981	0.998729	0.999713	0.962524	190.3	171.3	3.3	122.8	104.8	7.5	20.63	12.14	159.1	87.92	83.55	124.71	189.9	258.7	179.2	185.5	145.4	170.9	72.3
KGWMSILDEPGEPPSPSLTTTSTSQWK	1xPhospho [S/T]	Q9H2D6	TRIO and F-actin-binding protein OS=Homo sapiens OX=9606 GN=TRIOBP PE=1 SV=3	0.121	0.018	0.05	0.065	0.077	0.538	4.353	1.295	1.533	-3.04	-5.82	-4.31	-3.94	-3.69	-0.89	2.12	0.37	0.62	0.897897	0.229324	0.458988	0.430538	0.966806	0.939865	0.597761	1	0.871809	450.3	54.7	8	22.7	29.4	34.8	78.16	82.35	111.42	24.26	56.87	162.4	326	312.2	21.6	105.9	37.9	20.5	35.2
EREESEDELEEANGNNPIDIEVDQNK	1xPhospho [S5]; 1xDeamidated [N]	Q9UKL0	REST corepressor 1 OS=Homo sapiens OX=9606 GN=RCOR1 PE=1 SV=2	1.054	0.018	0.957	1.012	1.188	0.961	66.06	1.058	1.241	0.08	-5.8	-0.06	0.02	0.25	-0.06	6.05	0.08	0.31	0.999998	0.0575518	0.958313	1	0.977075	1	0.179963	0.94292	0.999997	114.8	120.9	2.1	109.8	116.2	136.3	37.57	23.83	157.18	80.61	35.39	80.06	85	179.7	118.7	176.8	125.1	115.1	0.3
SEAASPALPVITK	1xPhospho [S5]	Q99958	Forkhead box protein C2 OS=Homo sapiens OX=9606 GN=FOXC2 PE=1 SV=1	0.03	0.018	1.219	1.294	0.038	42.918	2.053	1.061	0.031	-5.05	-5.76	0.29	0.37	-4.72	5.42	1.04	0.09	-5.01	0.337422	0.121571	0.98502	0.999978	0.539852	0.269766	0.876948	0.96056	0.878141	166.7	5	3.1	203.2	215.7	6.3	14.9	166.57	44.88	83.73	2.23	160.94	178.5	147.6	134	185.2	0.4	4.4	4.1
GQPGNAYDGAGQPSAAYLSMSQGAVANANSTPPPYER	3xDeamidated [N/Q]; 1xPhospho [S/T]	Q96PK6	RNA-binding protein 14 OS=Homo sapiens OX=9606 GN=RBM14 PE=1 SV=2	0.909	0.02	0.276	0.032	0.017	0.036	0.892	0.117	0.063	-0.14	-5.68	-1.86	-4.95	-5.84	-4.81	-0.16	-3.09	-3.99	1	0.950373	0.999471	0.947909	0.643809	0.934776	0.979413	0.992522	0.813406	266.1	241.8	5.2	73.6	8.6	4.6	89.69	82.35	165.07	121.34	161.65	46.2	338.3	3.5	229.2	7.6	208.3	225.5	4.5
REFITGDVEPTDAESEWHSENEEEEK	1xPhospho [S]	Q99733	Nucleosome assembly protein 1-like 4 OS=Homo sapiens OX=9606 GN=NAP1L4 PE=1 SV=1	0.824	0.02	0.836	0.036	0.753	0.044	37.4	0.044	0.901	-0.28	-5.63	-0.26	-4.78	-0.41	-4.5	5.22	-4.52	-0.15	0.979498	0.770542	0.999998	0.804872	0.996401	0.424695	0.506574	0.851648	0.991198	172.9	142.5	3.5	144.5	6.3	130.2	83.28	18.23	156.04	80.84	156.84	31.25	183.2	213.1	6.3	188.7	151	132.4	3.7
FNGSTEALDKLDADAVSPTVSQLSAVFEK	1xPhospho [S/T]	Q96SB3	Neurabin-2 OS=Homo sapiens OX=9606 GN=PPP1R9B PE=1 SV=3	0.024	0.02	1.375	1.392	1.786	58.929	87.949	1.013	1.299	-5.4	-5.62	0.46	0.48	0.84	5.88	6.46	0.02	0.38	0.528807	0.65257	0.987605	0.999909	0.994337	0.411432	0.904718	0.954663	0.999998	107.2	2.5	2.2	147.4	149.3	191.4	15.66	166.65	167.06	84.98	14.86	85.3	129.7	107.1	95.6	116.8	0.5	2.5	148.4
KTQPSMVSNPGSCSDPQPSPEMKPHSYLDAIR	1xCarbamidomethyl [C13]; 1xPhospho [S19]	Q9H000	E3 ubiquitin-protein ligase makorin-2 OS=Homo sapiens OX=9606 GN=MKRN2 PE=1 SV=2	0.141	0.021	0.129	1.333	0.09	9.452	4.375	10.298	0.699	-2.83	-5.6	-2.95	0.41	-3.47	3.24	2.13	3.36	-0.52	0.744839	0.509684	0.936087	0.999818	0.868316	0.866581	0.981782	0.983363	0.999945	221	31.2	4.6	28.6	294.6	20	12.02	134.76	167.41	138.57	73.42	153.84	153.9	123.2	152	3	21.4	136.2	2.1
GPVGTVSEAQLAR	1xPhospho [S/T]	Q9NZM1	Myoferlin OS=Homo sapiens OX=9606 GN=MYOF PE=1 SV=1	0.029	0.021	0.017	0.028	0.013	0.984	0.651	1.644	0.788	-5.13	-5.59	-5.87	-5.15	-6.21	-0.02	-0.62	0.72	-0.34	0.67458	0.124326	0.0433234	0.282015	0.455924	0.968801	0.933438	0.834486	0.634932	541.5	15.5	11.2	9.3	15.2	7.3	16.28	159.44	68.84	89.68	6.61	170.36	256	355	301.9	8.2	8.6	301.5	1
IALESEGRPEEQMESDNCSGGDDDWTHLSSK	1xCarbamidomethyl [C18]; 1xPhospho [S]	Q13501	Sequestosome-1 OS=Homo sapiens OX=9606 GN=SQSTM1 PE=1 SV=1	0.994	0.021	0.055	0.029	0.012	0.029	0.574	0.523	0.22	-0.01	-5.57	-4.18	-5.12	-6.37	-5.11	-0.8	-0.93	-2.18	1	0.183983	0.450064	0.203198	0.0995975	0.206656	0.998494	0.989703	0.892177	284.3	282.5	6	15.6	8.2	3.4	81.71	88.93	84.94	30.65	31.67	85.7	14.4	379.1	361.8	540.2	359.5	9.8	3.7
VIPEDASESEEKLDQKEDGSKYETIHLTEEPTK	1xPhospho [S/T/Y]	Q9H2P0	Activity-dependent neuroprotector homeobox protein OS=Homo sapiens OX=9606 GN=ADNP PE=1 SV=1	0.857	0.021	0.062	1.145	0.734	1.336	34.729	18.574	11.913	-0.22	-5.56	-4.02	0.2	-0.45	0.42	5.12	4.22	3.57	1	0.37265	0.946691	0.962968	0.999764	0.968817	0.510727	0.575546	0.988687	157.1	134.6	3.3	9.7	179.9	115.4	81.9	78.1	127.21	158.12	10.08	83.61	187.2	175.2	6.9	161.3	150.1	10.8	0.4
QFIAAQNLGPASGHGTPASSPSSSSLPSPMSPTPR	1xDeamidated [N/Q]; 2xPhospho [S/T]	Q8WX93	Palladin OS=Homo sapiens OX=9606 GN=PALLD PE=1 SV=3	1.364	0.022	0.879	1.624	2.206	1.19	100.194	1.847	2.51	0.45	-5.5	-0.19	0.7	1.14	0.25	6.65	0.89	1.33	0.996781	0.564296	0.999992	0.999903	0.99904	0.999868	0.375421	0.999009	0.995568	84.6	115.4	1.9	74.3	137.3	186.6	126.52	115.88	172.07	41.21	23.99	18.41	262.7	44.2	14.5	60.3	379.5	47.3	1
IDHYRHTAAQLGEK	1xPhospho [T/Y]	P55011	Solute carrier family 12 member 2 OS=Homo sapiens OX=9606 GN=SLC12A2 PE=1 SV=1	0.84	0.023	1.092	1.759	0.186	2.095	8.006	1.611	0.17	-0.25	-5.43	0.13	0.81	-2.43	1.07	3	0.69	-2.55	0.999996	0.000500644	0.998103	0.969567	0.0354105	0.945063	0.159603	0.999132	0.0177019	122.5	102.8	2.8	133.7	215.4	22.8	61.61	15.03	101.08	12.99	37.21	69.86	123.7	57.3	221.6	103.8	129	97.7	2.7
NLSPTPASPNQGPPPQVPVSPGPPKDSSAPGGPPER	1xPhospho [S20]	Q9C0E8	Endoplasmic reticulum junction formation protein lunapark OS=Homo sapiens OX=9606 GN=LNPK PE=1 SV=2	0.351	0.023	1.46	1.017	3.325	2.899	141.967	0.697	2.277	-1.51	-5.42	0.55	0.02	1.73	1.54	7.15	-0.52	1.19	0.999141	0.142571	0.999224	0.999311	0.756832	0.980944	0.0153151	1	0.908	83.6	29.3	2	122.1	85	278	42.21	144.94	142.76	105.25	94.86	21.5	66.4	72.5	28.9	8.1	255	23.3	20.1
RPLLPFETEVGPCGVGEASLDKADSEGSNSGGTWPK	1xCarbamidomethyl [C13]; 1xPhospho [S/T]	Q8TDM6	Disks large homolog 5 OS=Homo sapiens OX=9606 GN=DLG5 PE=1 SV=4	0.77	0.024	0.841	1.681	0.971	2.182	41.002	1.999	1.154	-0.38	-5.4	-0.25	0.75	-0.04	1.13	5.36	1	0.21	0.997191	0.136979	0.999206	0.996038	0.998503	0.932142	0.24678	0.957655	1	113.5	87.4	2.7	95.4	190.8	110.2	33.16	87.24	158.18	83.84	32.64	70.96	141	110.4	70.1	188.4	85	19.5	2.6
NLNIINTHAYNQPEDLVYSQPEMR	1xPhospho [S19]	Q15678	Tyrosine-protein phosphatase non-receptor type 14 OS=Homo sapiens OX=9606 GN=PTPN14 PE=1 SV=2	0.673	0.024	1.016	1.279	1.073	1.9	45.284	1.258	1.056	-0.57	-5.4	0.02	0.35	0.1	0.93	5.5	0.33	0.08	0.999991	0.62721	1	0.999939	0.977106	1	0.270853	0.999966	0.973766	118.5	79.7	2.8	120.4	151.5	127.1	90.71	94.22	60.34	86.11	86.44	8.96	219.6	143.7	2	1.8	169.9	96.7	3.4
RLSLMEQVSGVEAFLQASQPPDPHR	1xDeamidated [Q]; 1xPhospho [S]	Q9Y4H2	Insulin receptor substrate 2 OS=Homo sapiens OX=9606 GN=IRS2 PE=1 SV=2	0.101	0.024	1.149	1.079	0.797	10.725	33.134	0.939	0.694	-3.31	-5.38	0.2	0.11	-0.33	3.42	5.05	-0.09	-0.53	0.524903	0.340513	0.980709	0.966129	0.997533	0.916839	0.565663	0.999998	0.999834	144.6	14.5	3.5	166.1	156	115.3	35.88	48.01	161.02	85.08	83.07	78.24	211.9	163.7	98.8	24	16.5	8.4	1.7
GAKLTPEEEEILNK	1xPhospho [T5]	P62241	Small ribosomal subunit protein eS8 OS=Homo sapiens OX=9606 GN=RPS8 PE=1 SV=2	0.552	0.025	0.86	0.779	0.466	1.413	18.878	0.907	0.543	-0.86	-5.34	-0.22	-0.36	-1.1	0.5	4.24	-0.14	-0.88	0.998077	0.002702	0.99321	0.973284	0.971241	0.999388	0.00921053	0.999948	0.999928	163	89.9	4	140.1	127	76	51.34	39.83	58.96	67.06	72.82	72.12	62.6	194.4	203.3	149.2	64.1	107.2	4.8
ELLVSQHTVQLVGGLSPLSSPSDTKAESPAEKVPEESVLPLVQK	2xDeamidated [Q10; Q]; 1xPhospho [S]	Q9UKV3	Apoptotic chromatin condensation inducer in the nucleus OS=Homo sapiens OX=9606 GN=ACIN1 PE=1 SV=2	0.768	0.025	0.801	0.657	0.76	0.856	30.419	0.821	0.949	-0.38	-5.32	-0.32	-0.61	-0.4	-0.22	4.93	-0.29	-0.08	0.999975	0.375222	0.977883	0.823785	0.977201	0.894456	0.762691	0.994889	1	149.6	114.9	3.7	119.8	98.3	113.7	29.4	6.6	163.75	83.51	96.07	77.73	208.6	116.1	151.4	129	116.2	114.6	3.8
AKTQTPPVSPAPQPTEERLPSSPVYEDAASFK	1xPhospho [T]	Q14247	Src substrate cortactin OS=Homo sapiens OX=9606 GN=CTTN PE=1 SV=2	0.012	0.025	0.029	0.048	0.559	3.867	22.101	1.663	19.542	-6.35	-5.31	-5.13	-4.39	-0.84	1.95	4.47	0.73	4.29	0.682415	0.919601	0.883961	0.976232	1	0.968731	0.917124	0.999055	0.880925	358.7	4.4	9.1	10.3	17.1	200.5	82.01	169.07	161.75	162.63	158.03	52.79	287	11.6	241.6	0.5	211.4	3	6.1
EDNSEGEEILEEVGGDLEEEDDHHMEFCR	1xDeamidated [N3]; 1xPhospho [S4]; 1xCarbamidomethyl [C28]	Q14839	Chromodomain-helicase-DNA-binding protein 4 OS=Homo sapiens OX=9606 GN=CHD4 PE=1 SV=2	0.768	0.025	0.801	0.657	0.76	0.856	29.945	0.821	0.949	-0.38	-5.3	-0.32	-0.61	-0.4	-0.22	4.9	-0.29	-0.08	0.999961	0.310919	0.967376	0.971238	0.86074	0.991726	0.888903	1	0.999031	149.6	114.8	3.8	119.8	98.3	113.7	29.4	6.6	163.21	83.45	88.6	85.03	208.4	116	151.3	128.9	116.1	114.5	1
TGYGGGFNERENVEYIEREESDGEYDEFGR	1xPhospho [S/T/Y]	O95218	Zinc finger Ran-binding domain-containing protein 2 OS=Homo sapiens OX=9606 GN=ZRANB2 PE=1 SV=2	0.356	0.026	0.324	0.361	0.247	1.014	9.429	1.115	0.763	-1.49	-5.26	-1.63	-1.47	-2.02	0.02	3.24	0.16	-0.39	0.878535	0.298186	0.990541	0.923815	0.928	0.999993	0.792191	0.99878	0.998985	259.3	92.3	6.8	83.9	93.6	64	71.85	86.04	162.5	12.05	71.99	110.55	361.9	51.3	240.1	7	138.8	85.5	1.2
ELLVSQHTVQLVGGLSPLSSPSDTK	1xPhospho [S/T]	Q9UKV3	Apoptotic chromatin condensation inducer in the nucleus OS=Homo sapiens OX=9606 GN=ACIN1 PE=1 SV=2	0.772	0.026	0.064	0.043	0.018	0.056	0.695	0.673	0.286	-0.37	-5.24	-3.96	-4.53	-5.77	-4.16	-0.53	-0.57	-1.81	0.932792	0.0630868	0.440098	0.0526923	0.020614	0.228672	0.982721	0.718084	0.409154	311.8	240.7	8.2	20	13.5	5.7	19.5	84.43	78.69	137.93	84.96	105.54	254.8	374.1	298.9	333.3	230.7	14.4	16.8
ANSFVGTAQYVSPELLTEK	1xPhospho [S/T/Y]	O15530	3-phosphoinositide-dependent protein kinase 1 OS=Homo sapiens OX=9606 GN=PDPK1 PE=1 SV=1	0.943	0.026	0.918	0.979	0.955	1.038	36.066	1.067	1.04	-0.08	-5.24	-0.12	-0.03	-0.07	0.05	5.17	0.09	0.06	0.999991	0.163636	1	1	0.817478	0.999999	0.725015	1	0.850184	124.5	117.4	3.3	114.2	121.8	118.8	24.63	3.55	162.8	18.86	17.86	84.74	165.7	106.4	116	109.4	113.8	106	3.1
GQTPLTEGSEDLDGHSDPEESFAR	1xPhospho [S/T]	Q86VR2	Reticulophagy regulator 3 OS=Homo sapiens OX=9606 GN=RETREG3 PE=1 SV=1	0.965	0.027	0.209	0.192	1.788	0.199	66.74	0.919	8.576	-0.05	-5.22	-2.26	-2.38	0.84	-2.33	6.06	-0.12	3.1	0.937009	0.0831287	0.999992	0.99953	0.733768	0.821709	0.008113	0.997337	0.803429	143.5	138.5	3.8	29.9	27.5	256.7	82.44	13.71	85.47	111.88	137.25	7.73	4.4	129.3	135.4	114.4	124.8	149	4.2
KISENSYSLDDLEIGPGQLSSSTFDSEKNESR	1xPhospho [S/Y]	Q9UHB6	LIM domain and actin-binding protein 1 OS=Homo sapiens OX=9606 GN=LIMA1 PE=1 SV=1	0.95	0.027	0.876	0.819	0.038	0.861	1.402	0.934	0.044	-0.07	-5.2	-0.19	-0.29	-4.71	-0.22	0.49	-0.1	-4.52	0.871342	0.549657	0.979478	0.9854	0.479344	0.996662	0.999994	1	0.852907	161.7	153.7	4.4	141.7	132.4	6.2	35.97	86.33	129.84	85.56	82.09	93.12	210.7	214.3	102.9	0.5	207.5	200.2	5.7
TEPHDSDCSVDLGISKSTEDLSPQK	1xCarbamidomethyl [C8]; 1xPhospho [S/T]	Q96RT1	Erbin OS=Homo sapiens OX=9606 GN=ERBIN PE=1 SV=2	0.509	0.028	0.795	0.027	0.649	0.054	23.388	0.034	0.817	-0.97	-5.17	-0.33	-5.2	-0.62	-4.22	4.55	-4.87	-0.29	0.999949	0.754648	0.997439	0.938878	0.999765	0.873757	0.605061	0.759833	0.999973	199.4	101.5	5.5	158.6	5.4	129.5	86.42	71.22	108.53	80.89	151.39	78.88	274	227.4	2.5	115.7	151.8	19.8	6.3
KISENSYSLDDLEIGPGQLSSSTFDSEK	1xPhospho [S/Y]	Q9UHB6	LIM domain and actin-binding protein 1 OS=Homo sapiens OX=9606 GN=LIMA1 PE=1 SV=1	0.97	0.029	0.863	0.855	0.026	0.881	0.889	0.991	0.03	-0.04	-5.12	-0.21	-0.23	-5.29	-0.18	-0.17	-0.01	-5.08	0.73416	0.176675	0.999996	0.99987	0.0299455	0.851128	0.877784	0.999995	0.0362863	160.3	155.5	4.6	138.3	137.1	4.1	20.1	84.99	145.9	8.76	25.76	24.07	176	196.6	130.7	170.7	176.9	2.2	4.4
TQSYPTDWSDDESNNPFSSTDANGDSNPFDDDATSGTEVR	1xPhospho [S/T/Y]	Q9UNF0	Protein kinase C and casein kinase substrate in neurons protein 2 OS=Homo sapiens OX=9606 GN=PACSIN2 PE=1 SV=2	0.01	0.029	0.005	0.003	0.028	0.298	0.978	0.598	5.538	-6.61	-5.11	-7.61	-8.35	-5.14	-1.75	-0.03	-0.74	2.47	0.125799	0.795601	0.0506187	0.0821141	0.43185	0.999773	0.983387	0.999633	0.713613	557.8	5.7	16.1	2.9	1.7	15.8	92.84	97.34	154.98	129.74	130.67	23.72	877.7	15.2	504.8	12.8	0.8	5.2	292.5
EHMMDGVTTRTFCGTPDYIAPEIIAYQPYGK	1xPhospho [T]; 1xCarbamidomethyl [C13]	P17252	Protein kinase C alpha type OS=Homo sapiens OX=9606 GN=PRKCA PE=1 SV=4	3.127	0.029	1.987	1.908	3.117	0.61	105.681	0.961	1.569	1.64	-5.08	0.99	0.93	1.64	-0.71	6.72	-0.06	0.65	0.987379	0.712017	0.959969	0.999942	0.996804	0.958178	0.454173	0.905444	0.795531	53.7	168	1.6	106.7	102.5	167.4	72.08	87.5	157.16	100.85	60.6	26	148.5	49.8	44.9	188.1	155.9	0.3	1.5
YSSDPTGALTEDSIDDTFLPVPEYINQSVPK	1xPhospho [S/T]	P00533	Epidermal growth factor receptor OS=Homo sapiens OX=9606 GN=EGFR PE=1 SV=2	0.044	0.03	0.005	0.034	0.025	0.774	0.836	6.929	5.069	-4.51	-5.07	-7.67	-4.88	-5.33	-0.37	-0.26	2.79	2.34	0.114367	0.0405397	0.00549938	0.0450449	0.0431063	0.991569	1	0.803372	0.816072	527.5	23.2	15.7	2.6	17.9	13.1	31.04	158.44	48.63	141.77	25.43	55.12	611	383.9	356.3	304.3	16.9	1.7	5.9
YWGPASPTHKLPPSFPGNKDELMQHMDEVNDELIR	1xPhospho [S/T]	Q9H6S3	Epidermal growth factor receptor kinase substrate 8-like protein 2 OS=Homo sapiens OX=9606 GN=EPS8L2 PE=1 SV=2	0.172	0.03	0.015	0.163	0.134	0.949	4.51	11.071	9.124	-2.54	-5.07	-6.09	-2.62	-2.9	-0.08	2.17	3.47	3.19	0.279287	0.0427996	0.0359756	0.608258	0.259819	0.983849	0.857131	0.422658	0.810023	396.5	68.1	11.8	5.8	64.6	53.2	58.94	61.42	96.25	148.27	26.11	47.57	108.9	449.6	463.5	17	77.2	80.7	52.7
GGGDEESGEHTQVPADSPDSQEEQKGESSASSPEEPEEITCLEK	1xPhospho [S/T]; 1xCarbamidomethyl [C41]	Q02952	A-kinase anchor protein 12 OS=Homo sapiens OX=9606 GN=AKAP12 PE=1 SV=4	0.057	0.03	0.014	0.041	0.099	0.717	3.306	2.84	6.864	-4.13	-5.06	-6.12	-4.61	-3.34	-0.48	1.73	1.51	2.78	0.316101	0.0823642	0.0299551	0.138948	0.926005	0.991983	0.343283	0.930795	0.142571	483.4	27.6	14.5	7	19.8	47.8	84.44	38.93	57.01	95.05	95.47	136.78	625.8	419.6	29.9	18.5	38.9	23.9	5.6
EGESPAAGPPPQELVEEEPSAPPTLLEEETEDGSDK	1xPhospho [S4]; 1xDeamidated [Q12]	Q8IZL8	Proline-, glutamic acid- and leucine-rich protein 1 OS=Homo sapiens OX=9606 GN=PELP1 PE=1 SV=2	0.207	0.03	0.076	0.144	0.076	0.697	2.532	1.886	0.993	-2.27	-5.06	-3.71	-2.8	-3.72	-0.52	1.34	0.92	-0.01	0.973173	0.327159	0.410245	0.754167	0.497094	0.987927	0.999208	0.987191	0.999978	391.4	80.9	11.7	29.9	56.4	29.7	70.34	131.21	165.15	64.01	46.74	51.81	55.8	392.8	285.5	404	59	20.1	8.6
MHHDIVRLLDEYNVTPSPPGTVLTSALSPVICGPNR	1xDeamidated [N13]; 3xPhospho [T15; T21; S28]; 1xCarbamidomethyl [C32]	Q04721	Neurogenic locus notch homolog protein 2 OS=Homo sapiens OX=9606 GN=NOTCH2 PE=1 SV=3	0.014	0.03	1.436	0.023	0.035	1.637	1.167	0.016	0.024	-6.17	-5.06	0.52	-5.46	-4.84	0.71	0.22	-5.98	-5.36	0.94315	0.989457	1	0.70819	0.99211	0.992657	1	0.690144	0.989832	236.4	3.3	7.1	339.6	5.4	8.3	91.67	168.23	164.76	85.83	37.41	164.91	270.5	3.5	166.2	230.5	2.2	2.3	4.3
EREPEPEPVEANSEESDSVFSENTEDLQEQFTTQK	1xPhospho [S]; 1xDeamidated [N]	Q5JRA6	Transport and Golgi organization protein 1 homolog OS=Homo sapiens OX=9606 GN=MIA3 PE=1 SV=1	0.034	0.03	0.057	0.534	0.031	15.659	1.035	9.295	0.541	-4.87	-5.06	-4.12	-0.9	-5.01	3.97	0.05	3.22	-0.89	0.94999	0.706072	0.985003	0.999719	0.821505	0.990534	0.999904	0.998881	0.991133	355.6	12.1	10.7	20.4	190	11.1	84.69	159.32	160.9	137.07	87.08	157.32	357.9	269.4	11.1	244	9.2	4.6	8.1
TVSLTPSPTTQVETPDLVDHDNTSPLFR	1xPhospho [S/T]	Q05209	Tyrosine-protein phosphatase non-receptor type 12 OS=Homo sapiens OX=9606 GN=PTPN12 PE=1 SV=3	0.834	0.03	0.98	1.051	0.009	1.26	0.296	1.073	0.009	-0.26	-5.05	-0.03	0.07	-6.81	0.33	-1.76	0.1	-6.78	0.843779	0.905255	0.786522	0.763935	0.0845449	0.999979	0.380809	1	0.00975348	153.7	128.2	4.6	150.6	161.5	1.4	85.18	18.5	155.1	8.54	11.34	47.1	157.8	171.3	2.1	161.2	111.6	131.7	4.8
EKPELSEPSHLNGPSSDPEAAFLSR	1xPhospho [S]	Q9H4A3	Serine/threonine-protein kinase WNK1 OS=Homo sapiens OX=9606 GN=WNK1 PE=1 SV=2	0.65	0.031	1.229	0.103	1.231	0.158	40.232	0.083	1.001	-0.62	-5.03	0.3	-3.29	0.3	-2.66	5.33	-3.58	0	0.998495	0.158005	1	0.418539	0.999896	0.634737	0.110763	0.38061	0.999987	141.4	91.9	4.3	173.8	14.5	174	132.81	56.38	106.06	26.97	148.46	104.16	547.2	90	14.2	103.2	31.3	58.5	14.8
EVDPSTGELQSLQMPESEGPSSLDPSQEGPTGLK	2xDeamidated [Q10; Q13]; 1xOxidation [M14]; 1xPhospho [S]	Q13501	Sequestosome-1 OS=Homo sapiens OX=9606 GN=SQSTM1 PE=1 SV=1	0.117	0.031	0.121	0.155	0.09	1.326	2.89	1.28	0.741	-3.09	-5.01	-3.04	-2.69	-3.48	0.41	1.53	0.36	-0.43	0.927655	0.493514	0.773296	0.994093	0.700169	0.997924	0.998928	0.964097	0.999992	396.1	46.4	12.3	48	61.5	35.6	85.18	144.19	98.81	54.08	140.77	62.66	419	14.1	299.7	318.1	35.1	5.7	9.3
LTQAEISEQPTMATVVPQVPTSPK	1xDeamidated [Q9]; 1xPhospho [S22]	Q70E73	Ras-associated and pleckstrin homology domains-containing protein 1 OS=Homo sapiens OX=9606 GN=RAPH1 PE=1 SV=3	1.805	0.032	0.047	0.071	0.094	0.039	2.969	1.499	1.992	0.85	-4.98	-4.4	-3.82	-3.41	-4.67	1.57	0.58	0.99	0.999898	0.294476	0.922255	0.617636	0.459336	0.490634	0.999114	0.986043	0.934962	196.8	355.2	6.2	9.3	13.9	18.5	82.88	81.09	101.41	163.95	28.88	70.53	196.9	16.3	289	16.1	355.3	374.9	6.2
LLDEYNVTPSPPGTVLTSALSPVICGPNR	1xPhospho [S/T]; 1xCarbamidomethyl [C25]	Q04721	Neurogenic locus notch homolog protein 2 OS=Homo sapiens OX=9606 GN=NOTCH2 PE=1 SV=3	0.968	0.032	0.043	0.035	0.038	0.036	1.207	0.819	0.891	-0.05	-4.98	-4.54	-4.83	-4.71	-4.78	0.27	-0.29	-0.17	0.926765	0.571374	0.535921	0.301139	0.243864	0.797896	0.980168	0.996293	0.986942	283.5	274.5	9	12.2	10	10.9	21.93	84.6	158.58	146.93	19.73	145.32	310.9	258.9	198.6	3.9	253.4	250.7	227.6
SCVEEPEPEPEAAEGDGDKKGNAEGSSDEEGKLVIDEPAK	1xCarbamidomethyl [C2]; 2xPhospho [S26; S27]	P51858	Hepatoma-derived growth factor OS=Homo sapiens OX=9606 GN=HDGF PE=1 SV=1	0.759	0.032	1.024	0.865	0.847	1.14	26.068	0.844	0.826	-0.4	-4.94	0.03	-0.21	-0.24	0.19	4.7	-0.24	-0.27	0.99971	0.0808845	1	1	0.999996	0.99961	0.0976965	1	0.999996	132.5	100.5	4.3	135.8	114.6	112.2	22	7.56	163.87	17.44	26.94	43.19	138.7	88.6	124.1	82.5	94.6	94.1	4
LYISNTFNPAKPDAEDSDGSIASWELR	1xDeamidated [N]; 1xPhospho [S17]	Q6STE5	SWI/SNF-related matrix-associated actin-dependent regulator of chromatin subfamily D member 3 OS=Homo sapiens OX=9606 GN=SMARCD3 PE=1 SV=1	1.032	0.033	1.065	1.103	1.101	1.069	33.855	1.036	1.033	0.05	-4.94	0.09	0.14	0.14	0.1	5.08	0.05	0.05	0.979745	0.17005	0.999983	0.999928	0.999981	0.939517	0.132793	1	1	112.5	116.1	3.7	119.8	124.1	123.8	17.62	78.52	165.13	4.79	4.46	6.01	113.9	113.2	82.1	7.8	116.9	122.7	0.5
EALNIIGDISTSTVSTPVPPPVDDTWLQSASSHSPTPQR	1xDeamidated [N/Q]; 1xPhospho [S/T]	P50570	Dynamin-2 OS=Homo sapiens OX=9606 GN=DNM2 PE=1 SV=2	0.018	0.033	2.921	0.023	0.049	1.244	1.475	0.008	0.017	-5.76	-4.92	1.55	-5.45	-4.36	0.31	0.56	-6.99	-5.91	0.424135	0.35917	0.999505	0.490888	0.942722	0.999994	0.833623	0.667016	0.990838	148.4	2.7	4.9	433.4	3.4	7.2	85.7	6.67	87.33	86.56	150.3	163.71	22.3	157.1	291.1	2.9	2.9	3.2	0.3
ATLDEEDLVDSLSEGDAYPNGLQVNFHSPR	1xPhospho [S/T/Y]; 2xDeamidated [N25; N/Q]	P42892	Endothelin-converting enzyme 1 OS=Homo sapiens OX=9606 GN=ECE1 PE=1 SV=2	0.376	0.034	0.334	0.539	0.204	1.434	6.058	1.614	0.611	-1.41	-4.89	-1.58	-0.89	-2.29	0.52	2.6	0.69	-0.71	0.999737	0.802092	0.994127	1	0.999358	0.999449	0.931392	0.991465	0.951538	241.4	90.7	8.1	80.6	130	49.2	85.66	2.83	139.76	84.49	87.77	111.5	3.4	226.3	265.9	85.1	80.9	85	7.6
KNTFTAWSDEESDYEIDDRDVNK	1xPhospho [S8]	Q6PKG0	La-related protein 1 OS=Homo sapiens OX=9606 GN=LARP1 PE=1 SV=2	0.594	0.034	0.038	1.079	1.059	1.817	31.209	28.094	27.575	-0.75	-4.88	-4.7	0.11	0.08	0.86	4.96	4.81	4.79	0.99994	0.860515	0.86723	0.967178	0.96879	0.91772	0.450538	0.454151	0.459065	157.8	93.7	5.4	6.1	170.2	167	84.7	75.11	164	161.73	6.64	21.57	188.7	5.3	145.5	86.4	8.2	89.2	4.9
LLESPGVEAGEGEAEKEEAGAQGRPLR	1xPhospho [S4]; 1xDeamidated [Q22]	Q6NYC8	Phostensin OS=Homo sapiens OX=9606 GN=PPP1R18 PE=1 SV=1	0.807	0.035	1.12	0.026	0.027	0.033	0.785	0.024	0.024	-0.31	-4.86	0.16	-5.24	-5.21	-4.93	-0.35	-5.4	-5.37	0.936834	0.116011	0.96099	0.328505	0.104676	0.812111	1	0.759783	0.345993	199	160.6	6.9	222.9	5.3	5.4	12.67	78.89	60.59	82.17	166.12	80.14	246.5	192.8	210.2	169.6	10.6	174.1	2.5
NQIPRTPENLITEIR	1xPhospho [T6]; 1xDeamidated [N/Q]	Q7Z4H7	HAUS augmin-like complex subunit 6 OS=Homo sapiens OX=9606 GN=HAUS6 PE=1 SV=2	0.26	0.035	1.325	1.093	1.522	4.208	44.018	0.825	1.148	-1.94	-4.85	0.41	0.13	0.61	2.07	5.46	-0.28	0.2	0.908384	0.448765	0.958896	0.996315	0.970893	0.684831	0.158969	0.99919	1	114.6	29.8	4	151.9	125.3	174.4	86.63	54.07	157.34	26.16	58.91	47	208.2	12.3	119.1	13.6	30.9	46.4	4.1
NLTANDPSQEYVASEGEEDPEVEFLK	1xPhospho [S/T/Y]	Q86X95	Corepressor interacting with RBPJ 1 OS=Homo sapiens OX=9606 GN=CIR1 PE=1 SV=1	0.058	0.035	0.053	0.107	0.056	1.841	1.609	2.029	1.059	-4.11	-4.85	-4.25	-3.22	-4.16	0.88	0.69	1.02	0.08	0.00459533	0.000739851	0.00335695	0.00519077	0.00209759	1	0.981603	0.999759	0.99962	458.6	26.6	15.9	24.2	49.1	25.6	26.01	46.2	95.79	47.92	58.33	70.57	414.6	382.2	607.4	43.4	18.2	24.1	14.4
ELPPPSEEIKTGEDEDEEDNDALLKENESPDVRR	1xDeamidated [N20]; 1xPhospho [S29]	Q96FV9	THO complex subunit 1 OS=Homo sapiens OX=9606 GN=THOC1 PE=1 SV=1	0.834	0.035	0.822	0.997	0.479	1.195	13.764	1.213	0.583	-0.26	-4.84	-0.28	0	-1.06	0.26	3.78	0.28	-0.78	1	0.189742	0.985217	0.9979	0.957147	0.999175	0.552977	0.999903	0.999963	144	120.1	5	118.3	143.6	69	10.93	9.82	163.39	71.26	66.25	95.36	149.6	149.4	122.9	117.7	142.2	124.6	0.3
TLNAETPKSSPLPAK	1xPhospho [S/T]	Q7L2J0	7SK snRNA methylphosphate capping enzyme OS=Homo sapiens OX=9606 GN=MEPCE PE=1 SV=1	0.798	0.035	1.002	0.589	0.189	0.738	5.39	0.588	0.189	-0.33	-4.83	0	-0.76	-2.4	-0.44	2.43	-0.77	-2.41	0.998605	0.00677228	1	0.93069	0.0447775	0.992806	0.862592	0.94885	0.0503151	166.1	132.5	5.8	166.4	97.8	31.4	19.07	18.32	136.69	9.14	19.84	72.71	157.3	150.7	210.9	159.6	125.5	112.6	5.5
WNSNDFIDAFASPVEAEGTPEPGAEAAK	2xDeamidated [N2; N4]; 1xPhospho [S12]	O00562	Membrane-associated phosphatidylinositol transfer protein 1 OS=Homo sapiens OX=9606 GN=PITPNM1 PE=1 SV=4	0.103	0.036	0.307	0.075	0.121	0.728	3.356	0.243	0.394	-3.28	-4.79	-1.7	-3.74	-3.05	-0.46	1.75	-2.04	-1.34	0.297584	0.0558412	0.890541	0.18506	0.327685	0.999342	0.852775	0.674373	0.875015	365.4	37.5	13.2	112.3	27.3	44.2	54.12	98.18	133.3	15.06	116.18	70.54	412.1	113.3	331.7	127	34.1	18.3	95
NGIGPGSHSEFAASIGSPKR	1xDeamidated [N1]; 1xPhospho [S17]	Q9H694	Protein bicaudal C homolog 1 OS=Homo sapiens OX=9606 GN=BICC1 PE=1 SV=2	0.912	0.036	0.93	0.79	0.764	0.866	21.017	0.849	0.821	-0.13	-4.78	-0.1	-0.34	-0.39	-0.21	4.39	-0.24	-0.28	0.990324	0.330021	0.809627	0.99998	0.999106	0.997847	0.505486	0.880742	0.941839	135.3	123.5	4.9	125.9	107	103.4	9.42	71.58	157.07	84.72	20.12	38.61	151.1	126	146	133.2	154.6	18.6	2.9
TVMDGGLESDGPNMTENGLEDESRPQR	1xPhospho [S9]	P51116	RNA-binding protein FXR2 OS=Homo sapiens OX=9606 GN=FXR2 PE=1 SV=2	0.023	0.036	0.074	1.633	0.092	70.647	2.524	21.977	1.236	-5.44	-4.78	-3.75	0.71	-3.44	6.14	1.34	4.46	0.31	0.00457765	0.0342919	0.180471	0.707196	0.169869	0.000490413	0.915757	0.0169985	1	209.9	4.9	7.6	15.6	342.7	19.3	87.16	57.92	99.5	33.41	23.03	29.08	381.5	226.4	18.7	1.6	6.5	5.2	27.6
RTQSSLTVSEVLTR	1xPhospho [S/T]	Q86V48	Leucine zipper protein 1 OS=Homo sapiens OX=9606 GN=LUZP1 PE=1 SV=2	1.42	0.036	1.248	1.777	1.001	1.251	27.442	1.424	0.802	0.51	-4.78	0.32	0.83	0	0.32	4.78	0.51	-0.32	0.871695	0.0080943	0.927509	0.763588	0.999993	0.999885	0.00650566	0.998521	0.96006	92.6	131.5	3.4	115.5	164.5	92.6	57.75	14.3	127.15	20.03	2.42	54.74	27.1	112.4	91.8	130.4	164.9	129.3	0.5
RPSSVGELASLGQELQAITTATTPSLDSEGQEPALR	1xPhospho [S]; 1xDeamidated [Q]	O43379	WD repeat-containing protein 62 OS=Homo sapiens OX=9606 GN=WDR62 PE=1 SV=4	0.054	0.037	0.036	0.088	0.142	1.631	3.874	2.462	3.947	-4.21	-4.77	-4.8	-3.5	-2.82	0.71	1.95	1.3	1.98	0.912123	0.541016	0.753002	0.474396	0.928804	0.950194	0.964174	0.995396	0.998025	442.4	23.9	16.2	15.9	39	62.6	88.53	149.51	96.25	156.25	99.45	25.07	528.3	315.2	20.5	17.1	15	319	9.1
KPSLVSDLPWEGAAPQSPSFSGSEDSGSPK	1xDeamidated [Q16]; 1xPhospho [S]	Q13425	Beta-2-syntrophin OS=Homo sapiens OX=9606 GN=SNTB2 PE=1 SV=1	0.055	0.037	0.053	0.05	0.044	0.913	1.176	0.945	0.817	-4.18	-4.75	-4.23	-4.31	-4.52	-0.13	0.23	-0.08	-0.29	0.985861	0.98082	0.930367	0.983567	0.98313	1	1	0.999725	0.999744	483.9	26.7	18	25.8	24.4	21.1	83.44	154	157.8	160.59	157.52	155.38	8.3	265.2	218.7	234	6.6	12.1	7.4
SSRPPRPPR	1xPhospho [S]	A0A1B0GTJ6	Stabilizer of axonemal microtubules 3 OS=Homo sapiens OX=9606 GN=SAXO3 PE=4 SV=1	0.749	0.037	0.104	0.16	0.105	0.213	2.835	1.531	1.009	-0.42	-4.75	-3.26	-2.65	-3.25	-2.23	1.5	0.61	0.01	0.978788	0.391313	0.938214	0.942291	0.795513	0.999954	0.972712	1	0.99891	278.4	208.5	10.3	29	44.5	29.3	79.2	103.59	40.99	146.1	149.93	33.94	30.9	196.2	317.2	2.2	147	336.9	7.3
NGILAIEGTGSDVDDDMSGDEKQDNESNVDPR	2xDeamidated [N1; N25]; 1xPhospho [S18]	Q93008	Ubiquitin carboxyl-terminal hydrolase 9X OS=Homo sapiens OX=9606 GN=USP9X PE=1 SV=4	0.127	0.037	4.063	3.8	3.541	29.81	95.223	0.935	0.872	-2.97	-4.75	2.02	1.93	1.82	4.9	6.57	-0.1	-0.2	0.96454	0.432949	0.995412	0.84844	0.999892	0.423639	0.324852	0.983118	0.999756	47.7	6.1	1.8	194	181.4	169.1	119.44	161.32	101.42	80.03	8.83	83.09	48.3	198.8	6.7	6.2	2.5	180.5	9.3
SDLLIDENCLLSPLAGEDDSFLLEGNSNEDCKPLILPDTKPK	2xDeamidated [N26; N]; 2xCarbamidomethyl [C9; C31]; 1xPhospho [S]	P04150	Glucocorticoid receptor OS=Homo sapiens OX=9606 GN=NR3C1 PE=1 SV=1	1.106	0.037	1.209	0.046	1.664	0.042	44.62	0.038	1.376	0.15	-4.75	0.27	-4.44	0.73	-4.58	5.48	-4.71	0.46	0.999996	0.406611	0.999856	0.996	0.871825	0.989217	0.0796161	0.975337	0.949169	118.5	131.1	4.4	143.3	5.5	197.2	84.37	84.52	86.27	83.21	158.02	20.89	136.4	134	2.3	148.2	167	3.1	5
NKRDSTEITSILLK	1xPhospho [S/T]	Q8IYU2	E3 ubiquitin-protein ligase HACE1 OS=Homo sapiens OX=9606 GN=HACE1 PE=1 SV=2	0.62	0.037	0.772	0.114	0.588	0.184	15.699	0.148	0.761	-0.69	-4.74	-0.37	-3.13	-0.77	-2.44	3.97	-2.76	-0.39	0.998638	0.00866764	0.710966	0.0275269	0.712505	0.0524402	0.0944655	0.271176	1	191.6	118.7	7.2	148	21.8	112.7	13.65	29.27	26.17	77.79	64.57	67.38	168.6	212.4	218.6	127.5	131.6	208.5	8
MGQAGSTISNSHAQPFDFPDDNQNSK	2xPhospho [S9; S]; 1xDeamidated [N/Q]	P17302	Gap junction alpha-1 protein OS=Homo sapiens OX=9606 GN=GJA1 PE=1 SV=2	0.768	0.038	0.987	0.669	0.737	0.871	19.492	0.678	0.746	-0.38	-4.73	-0.02	-0.58	-0.44	-0.2	4.28	-0.56	-0.42	0.997745	0.80333	0.880536	0.966371	0.999791	0.999094	0.663145	0.999565	0.958231	142.9	109.8	5.4	141.1	95.6	105.3	82.44	58.43	150.38	12.91	12.46	67.82	158.3	5.4	165.8	121.7	31.1	131.4	5
IGHHSTSDDSSAYRSVDEVNYWDKQDHPISR	2xPhospho [S/T/Y]	P12694	2-oxoisovalerate dehydrogenase subunit alpha, mitochondrial OS=Homo sapiens OX=9606 GN=BCKDHA PE=1 SV=2	0.056	0.038	1.124	0.418	0.067	7.431	1.767	0.372	0.06	-4.15	-4.72	0.17	-1.26	-3.89	2.89	0.82	-1.43	-4.06	0.0147371	0.00358876	0.999982	0.244534	0.03782	0.541642	0.720809	0.19403	0.028989	222	12.5	8.4	249.5	92.7	14.9	25.13	49.65	73	22.45	83.22	13.93	293.8	177.1	227.9	14.2	4.5	12.8	1.2
VAEPGAEATSSTGEESGSEHPPAVPMHNKR	1xPhospho [S/T]	Q14684	Ribosomal RNA processing protein 1 homolog B OS=Homo sapiens OX=9606 GN=RRP1B PE=1 SV=3	0.082	0.038	0.877	0.443	0.356	5.395	9.295	0.505	0.406	-3.61	-4.71	-0.19	-1.18	-1.49	2.43	3.22	-0.99	-1.3	0.000774079	6.57649e-05	1	0.458198	0.077214	0.0159063	0.00647369	0.455582	0.0765896	214.6	17.6	8.2	188.3	95	76.4	13.8	40.16	48.18	22.98	16.93	74.21	234.7	177.6	212.4	8.3	19.9	17.4	3.3
WDETPASQMGGSTPVLTPGK	1xPhospho [S/T]	O75533	Splicing factor 3B subunit 1 OS=Homo sapiens OX=9606 GN=SF3B1 PE=1 SV=3	0.896	0.039	0.028	0.55	0.121	0.614	3.141	19.912	4.39	-0.16	-4.69	-5.18	-0.86	-3.04	-0.7	1.65	4.32	2.13	1	0.407364	0.165093	0.998925	0.263956	0.998133	0.999353	0.281763	0.999445	227.8	204.1	8.8	6.3	125.4	27.6	26.78	10.07	156.35	157.04	22.98	88.69	217.4	197.9	125.8	207	172.4	177.3	7.6
SSSSASQSNHSCTSMPSSPATPASGTK	1xPhospho [S/T]; 1xDeamidated [N/Q]; 1xCarbamidomethyl [C12]	Q9UPN3	Microtubule-actin cross-linking factor 1, isoforms 1/2/3/4/5 OS=Homo sapiens OX=9606 GN=MACF1 PE=1 SV=4	1.025	0.039	2.899	1.373	1.877	1.339	48.582	0.474	0.648	0.04	-4.69	1.54	0.46	0.91	0.42	5.6	-1.08	-0.63	0.999252	0.482742	0.927892	0.986852	0.913992	0.999662	0.121513	0.999459	1	73.1	74.9	2.8	211.8	100.3	137.2	96.28	99.06	154.48	77.46	34.2	17.09	70.1	8.9	163.6	71.9	18.6	211.9	2.4
SQSASVESIPEVLEECTSPADHSDSASVHDMDYVNPR	2xPhospho [S5; S8]; 1xCarbamidomethyl [C16]	Q92538	Golgi-specific brefeldin A-resistance guanine nucleotide exchange factor 1 OS=Homo sapiens OX=9606 GN=GBF1 PE=1 SV=3	0.053	0.039	0.055	0.038	0.04	0.703	1.039	0.688	0.736	-4.22	-4.69	-4.19	-4.73	-4.64	-0.51	0.06	-0.54	-0.44	0.534495	0.486107	0.389142	0.123849	0.538242	0.885184	0.999999	0.96355	0.999692	489.9	26.2	19	26.8	18.4	19.7	53.22	163.14	146.03	151.02	79.11	143.18	501.8	238.2	195.4	367.1	2.1	12.7	127.6
APSVANVGSHCDLSLKIPEISIQDMTAQVTSPSGK	1xPhospho [S]; 1xDeamidated [N/Q]; 1xCarbamidomethyl [C11]	P21333	Filamin-A OS=Homo sapiens OX=9606 GN=FLNA PE=1 SV=4	0.926	0.039	0.201	1.979	1.989	2.136	51.208	9.834	9.884	-0.11	-4.69	-2.31	0.98	0.99	1.1	5.68	3.3	3.31	0.999743	0.757686	0.929217	0.914809	0.999941	0.802916	0.645858	0.436236	0.856879	97.8	90.6	3.8	19.7	193.6	194.6	73.99	91.77	161.66	13.54	18.87	81.99	16.8	99.5	142.3	92.2	169.4	5.9	3.4
RPGEPFNGQMVTEGRSQEEGEQK	1xDeamidated [N/Q]; 1xPhospho [S/T]	Q6ZMP0	Thrombospondin type-1 domain-containing protein 4 OS=Homo sapiens OX=9606 GN=THSD4 PE=1 SV=2	0.414	0.039	0.113	0.328	0.776	0.792	19.805	2.898	6.867	-1.27	-4.67	-3.15	-1.61	-0.37	-0.34	4.31	1.54	2.78	0.990792	0.160935	0.645033	0.818378	0.865761	0.984818	0.658143	0.9994	0.997658	224.8	93	8.8	25.4	73.6	174.4	18.67	81.93	134.85	101.36	113.6	86.68	200.2	265.2	190.1	82.8	226.7	43.6	0.3
GSYGDLGGPIITTQVTIPK	1xPhospho [S/Y]	P61978	Heterogeneous nuclear ribonucleoprotein K OS=Homo sapiens OX=9606 GN=HNRNPK PE=1 SV=1	0.072	0.04	0.018	0.041	0.052	0.568	1.294	2.298	2.928	-3.79	-4.63	-5.81	-4.61	-4.26	-0.82	0.37	1.2	1.55	0.687941	0.543776	0.103504	0.387578	0.638058	0.992792	0.999978	0.938862	0.748217	490.4	35.4	19.8	8.7	20.1	25.6	79.1	25.47	49.34	74.21	93.9	163.71	410.8	503.6	32.3	29.6	36.3	21.5	15.2
LRTSTSDLSR	1xPhospho [S/T]	Q5T5U3	Rho GTPase-activating protein 21 OS=Homo sapiens OX=9606 GN=ARHGAP21 PE=1 SV=2	1.052	0.041	0.935	0.89	0.802	0.846	19.686	0.952	0.857	0.07	-4.62	-0.1	-0.17	-0.32	-0.24	4.3	-0.07	-0.22	0.999998	3.94517e-06	0.99949	0.999566	0.960897	0.99818	9.58917e-06	1	0.995469	127.1	133.7	5.2	118.9	113.2	101.9	21.8	8.8	68.41	10.59	14.66	18.43	125	107.1	163.3	125.9	148.8	131.6	5.1
EMDTARTPLSEAEFEEIMNR	1xPhospho [T7]; 1xDeamidated [N19]	Q16630	Cleavage and polyadenylation specificity factor subunit 6 OS=Homo sapiens OX=9606 GN=CPSF6 PE=1 SV=2	0.964	0.041	1.009	0.149	0.116	0.154	2.83	0.147	0.115	-0.05	-4.61	0.01	-2.75	-3.11	-2.7	1.5	-2.76	-3.12	1	0.452495	1	0.585505	0.505965	0.60472	0.999998	0.583691	0.504216	183	176.4	7.5	184.7	27.2	21.2	4.95	5.21	156.48	7.08	138.38	146.14	139.4	153.8	145.9	133.1	140.6	147.7	6
LGDNGEAFFVQETDNDQEVIPMHLATSPILSEGASR	1xDeamidated [N/Q]; 1xPhospho [S/T]	Q14693	Phosphatidate phosphatase LPIN1 OS=Homo sapiens OX=9606 GN=LPIN1 PE=1 SV=2	1.557	0.041	0.832	1.38	1.023	0.886	24.933	1.659	1.229	0.64	-4.61	-0.27	0.46	0.03	-0.17	4.64	0.73	0.3	0.998877	0.213137	0.861746	0.998431	0.855409	1	0.774012	0.659411	1	102.9	160.2	4.2	85.6	141.9	105.2	47.61	54.29	147.53	77.6	55.92	82.27	175.5	88.3	76.7	137.5	271.6	96.7	3.6
TEDGGWEWSDDEFDEESEEGKAAISQLR	1xPhospho [S9]	O95747	Serine/threonine-protein kinase OSR1 OS=Homo sapiens OX=9606 GN=OXSR1 PE=1 SV=1	0.027	0.041	0.04	0.025	0.039	0.925	0.948	0.633	0.971	-5.19	-4.61	-4.64	-5.3	-4.68	-0.11	-0.08	-0.66	-0.04	0.339141	0.900293	0.910591	0.198454	0.379958	0.998686	0.907265	0.668457	0.896758	511.7	14	21	20.5	13	19.9	94.07	29.79	158.46	154.08	78.1	49	624.1	10.4	345.6	11.5	9.5	6.1	8.3
LPNGLGGPNGFPKPTPEEGPPELNRQSPNSSSAAASVASR	4xDeamidated [N3; N9; N24; N29]; 1xPhospho [S27]	Q9H1B7	Probable E3 ubiquitin-protein ligase IRF2BPL OS=Homo sapiens OX=9606 GN=IRF2BPL PE=1 SV=1	1.296	0.041	0.101	0.047	0.061	0.036	1.482	0.462	0.604	0.37	-4.6	-3.31	-4.42	-4.04	-4.8	0.57	-1.11	-0.73	0.837234	0.0362138	0.212613	0.0297761	0.0226124	0.00413594	0.999706	0.822718	0.739844	235.7	305.5	9.7	23.8	11	14.4	86.1	45.56	96.51	16.54	19	63.34	24.8	230.4	401	182.5	298.7	469.5	9.5
SRTSPVSR	1xPhospho [S/T]	Q9UQ35	Serine/arginine repetitive matrix protein 2 OS=Homo sapiens OX=9606 GN=SRRM2 PE=1 SV=2	0.056	0.041	3.106	2.8	3.717	49.793	90.027	0.901	1.197	-4.15	-4.6	1.63	1.49	1.89	5.64	6.49	-0.15	0.26	0.338754	0.237798	0.88411	0.919507	0.79575	0.0782243	0.0308566	0.999998	0.999944	56	3.1	2.3	173.8	156.7	208	38.48	156.28	160.64	13.16	12.22	9.88	36.2	79.3	53.4	3	1.3	61	59.2
VILSNMVSISSEPFGHLVDDDDISDQEDHRSEEK	1xPhospho [S24]	Q53HC9	EARP and GARP complex-interacting protein 1 OS=Homo sapiens OX=9606 GN=EIPR1 PE=1 SV=2	1.068	0.041	0.043	0.078	0.119	0.073	2.872	1.827	2.772	0.09	-4.6	-4.55	-3.68	-3.08	-3.77	1.52	0.87	1.47	0.994009	0.578227	0.90542	0.885331	0.645358	0.993066	0.999996	1	0.993566	255.5	272.8	10.5	10.9	20	30.3	75.65	90.37	44.43	157.6	160.08	79.41	295.5	206.9	31.2	220.9	327.8	2.2	6.1
METMASPGKDNYR	1xAcetyl [N-Term]; 1xPhospho [S6]	O60684	Importin subunit alpha-7 OS=Homo sapiens OX=9606 GN=KPNA6 PE=1 SV=1	0.859	0.041	0.685	0.623	0.576	0.726	13.92	0.91	0.84	-0.22	-4.6	-0.55	-0.68	-0.8	-0.46	3.8	-0.14	-0.25	0.999849	0.0520658	0.995902	0.991608	0.974933	0.999408	0.168034	0.999999	0.999855	158.6	136.2	6.6	108.6	98.8	91.3	10.19	7.6	160.17	1.64	6.75	14.65	133.3	163.4	146.9	126.1	111.5	128.6	6.1
RSTSPIIGSPPVR	2xPhospho [S/T]	Q86TB9	Protein PAT1 homolog 1 OS=Homo sapiens OX=9606 GN=PATL1 PE=1 SV=2	0.97	0.041	1.018	0.868	0.021	0.894	0.506	0.852	0.021	-0.04	-4.6	0.03	-0.2	-5.58	-0.16	-0.98	-0.23	-5.6	1	0.0192953	0.999999	0.999965	0.0130508	0.999966	0.99988	0.999778	0.0113595	153.1	148.6	6.3	155.9	132.9	3.2	7.03	3.27	26.82	6.59	5.22	160.25	146.9	152.9	133.1	142.5	140.2	149.3	9
QMLATTSPALMNGSGQSPSVLK	2xDeamidated [Q1; N12]; 1xPhospho [S17]	Q9BZ29	Dedicator of cytokinesis protein 9 OS=Homo sapiens OX=9606 GN=DOCK9 PE=1 SV=2	0.773	0.042	1.229	0.14	0.097	0.181	2.297	0.114	0.079	-0.37	-4.56	0.3	-2.83	-3.36	-2.46	1.2	-3.13	-3.66	0.981169	0.22715	0.997366	0.488744	0.594973	0.854494	0.966504	0.737177	0.832431	182.8	141.3	7.7	224.7	25.6	17.8	14.29	82.75	160.99	69.11	19.75	141.22	167	210	163.9	129.1	19.5	226	1.3
VGVEASEETPQTSSSSARPGTPSDHQSQEASQFER	1xPhospho [T]; 1xDeamidated [Q]	Q6Y7W6	GRB10-interacting GYF protein 2 OS=Homo sapiens OX=9606 GN=GIGYF2 PE=1 SV=1	0.025	0.043	0.048	0.048	0.009	1.94	0.212	0.986	0.188	-5.35	-4.54	-4.37	-4.39	-6.78	0.96	-2.24	-0.02	-2.41	0.335769	0.614935	0.726762	0.990558	0.262661	0.643513	0.977039	0.958106	0.937239	511.6	12.6	21.9	24.8	24.4	4.7	84.87	85.56	45.81	10.7	164.91	101.05	380.5	426	6.7	19.6	9.4	2	7.7
MDSAGQDINLNSPNKGLLSDSMTDVPVDTGVAAR	1xAcetyl [N-Term]; 1xPhospho [S12]; 1xDeamidated [N]	O43399	Tumor protein D54 OS=Homo sapiens OX=9606 GN=TPD52L2 PE=1 SV=2	1.031	0.044	0.113	0.957	0.038	0.928	0.864	8.456	0.337	0.04	-4.5	-3.14	-0.06	-4.71	-0.11	-0.21	3.08	-1.57	0.999997	0.915985	0.992855	0.999987	0.874904	1	0.999996	0.979111	0.992703	188.5	194.3	8.3	21.3	180.3	7.2	82.17	76.56	156.18	144.13	74.7	167.11	205.5	153.2	10.3	199.5	157.9	17.1	3.7
FSEMMNNMGGDEDVDLPEVDGADDDSQDSDDEKMPDLE	1xDeamidated [N/Q]; 2xPhospho [S26; S29]	Q15185	Prostaglandin E synthase 3 OS=Homo sapiens OX=9606 GN=PTGES3 PE=1 SV=1	0.013	0.044	0.142	0.044	0.073	3.42	1.66	0.308	0.518	-6.29	-4.5	-2.82	-4.52	-3.77	1.77	0.73	-1.7	-0.95	0.131883	0.293051	0.935144	0.320892	0.459508	0.988695	0.999066	0.806584	0.922152	456	5.8	20.2	64.6	19.9	33.5	123.64	131.07	47.62	160.73	83.73	95.24	182.4	796.8	17.4	22.4	2.3	2	6.2
GCDSPDPDTSYVLTPHTEEK	1xCarbamidomethyl [C2]; 1xPhospho [S4]	Q02078	Myocyte-specific enhancer factor 2A OS=Homo sapiens OX=9606 GN=MEF2A PE=1 SV=1	0.549	0.045	0.959	0.672	0.372	1.223	8.299	0.7	0.388	-0.86	-4.48	-0.06	-0.57	-1.43	0.29	3.05	-0.51	-1.37	0.572926	1.0167e-05	0.999409	0.874494	0.0403459	0.99085	0.0010459	0.967169	0.0690742	166.8	91.6	7.5	160	112	62	7.29	26.01	52.51	18.98	8.56	62.92	169.4	178	154	93	73.8	123.7	12.7
YLVDGTKPNAGSEEISSEDDELVEEKK	3xPhospho [S16; S17; S/T]	Q9NY61	Protein AATF OS=Homo sapiens OX=9606 GN=AATF PE=1 SV=1	0.052	0.045	0.047	0.865	1.43	16.508	31.848	18.533	30.643	-4.25	-4.48	-4.42	-0.21	0.52	4.05	4.99	4.21	4.94	0.0804473	0.116685	0.0518967	0.923218	0.939888	0.341	0.422812	0.236653	0.217179	174.5	9.1	7.8	8.1	150.9	249.5	19.54	59.35	30.87	74.51	81.13	84.6	215	265.7	180.1	12.5	2.8	11.3	6.9
HSCIFPGQYNPSFISDESR	1xPhospho [S2]; 1xCarbamidomethyl [C3]; 1xDeamidated [N/Q]	Q9ULI3	Protein HEG homolog 1 OS=Homo sapiens OX=9606 GN=HEG1 PE=1 SV=3	0.752	0.045	0.377	0.715	0.11	0.95	2.429	1.898	0.292	-0.41	-4.46	-1.41	-0.48	-3.18	-0.07	1.28	0.92	-1.77	0.998939	0.675746	0.995958	0.973645	0.931536	0.998842	0.991741	0.821661	0.997189	200	150.5	9.1	75.4	143	22	80.75	49.28	156.35	110.07	50.73	42.84	199.9	9.2	183.2	137.9	54.5	169.8	1.3
GPGQVPTATSALSLELQEVEPLGLPQASPSR	1xPhospho [S28]	Q6P2E9	Enhancer of mRNA-decapping protein 4 OS=Homo sapiens OX=9606 GN=EDC4 PE=1 SV=1	0.005	0.046	0.025	0.026	0.046	5.401	1.006	1.058	1.854	-7.69	-4.45	-5.34	-5.26	-4.45	2.43	0.01	0.08	0.89	0.232991	0.92531	0.95892	0.669177	0.717078	0.94225	0.996474	0.980083	0.988881	523	2.5	23.9	12.9	13.7	24	84.68	137.21	162.64	164.74	29.58	54.06	354.2	411.7	7.9	1.7	0.8	15.8	16.2
CAPSAGSPAAAVGRESPGAAATSSSGPQAQQHR	1xCarbamidomethyl [C1]; 2xPhospho [S7; S16]	Q7L2J0	7SK snRNA methylphosphate capping enzyme OS=Homo sapiens OX=9606 GN=MEPCE PE=1 SV=1	0.099	0.046	0.023	0.081	0.099	0.825	2.151	3.507	4.265	-3.34	-4.44	-5.43	-3.62	-3.34	-0.28	1.1	1.81	2.09	0.549558	0.289175	0.0764143	0.15756	0.485381	0.928028	0.998076	0.997013	0.791699	444.9	43.9	20.5	10.3	36.2	44.1	73.51	128.84	65.78	114.14	75.25	25.08	478	559.3	58.8	263.8	47.2	9	19.1
GGSPYNQFDIIPGDTLGGHTGPAGDSWLPAK	1xPhospho [S3]; 2xDeamidated [N6; Q7]	Q9UPQ9	Trinucleotide repeat-containing gene 6B protein OS=Homo sapiens OX=9606 GN=TNRC6B PE=1 SV=4	0.95	0.046	0.82	0.868	0.106	0.914	2.299	1.059	0.129	-0.07	-4.44	-0.29	-0.2	-3.24	-0.13	1.2	0.08	-2.95	0.782238	0.0748492	0.999989	0.926136	0.157344	0.999128	0.996633	0.961161	0.195273	158.3	150.4	7.3	129.8	137.4	16.8	12.71	84.34	56.96	12.81	78.26	54	193.3	185.3	151	195.5	176.1	3.8	16.1
ENQGSHESPTLNPETVAINLSDVDLSK	1xPhospho [S/T]; 1xDeamidated [N]	P25445	Tumor necrosis factor receptor superfamily member 6 OS=Homo sapiens OX=9606 GN=FAS PE=1 SV=1	0.547	0.046	1.019	0.555	0.554	1.015	11.937	0.545	0.543	-0.87	-4.43	0.03	-0.85	-0.85	0.02	3.58	-0.88	-0.88	0.997511	0.11535	0.997491	1	0.999568	0.998834	0.18456	0.995235	0.973075	161.2	88.2	7.5	164.3	89.5	89.3	55.58	12.23	153.74	3.84	46.35	45	182.1	47.6	145.3	79.5	70	89.5	124.7
MQNGFGSPEPSLPGTPHSPAPPSGGTWK	1xDeamidated [N3]; 1xPhospho [S18]	Q8N1G0	Zinc finger protein 687 OS=Homo sapiens OX=9606 GN=ZNF687 PE=1 SV=1	0.082	0.047	0.031	0.198	0.051	2.425	1.086	6.4	1.64	-3.62	-4.42	-5.02	-2.34	-4.3	1.28	0.12	2.68	0.71	0.464563	0.312232	0.112536	0.301522	0.163088	0.999201	0.997152	0.983526	0.99987	426.3	34.7	19.9	13.2	84.3	21.6	65.48	63.26	86.69	130.03	81.74	66.18	93.1	542	491.9	27.2	40.1	90	22.9
LLSSSLTADCSLR	1xPhospho [S5]; 1xCarbamidomethyl [C10]	Q147X3	N-alpha-acetyltransferase 30 OS=Homo sapiens OX=9606 GN=NAA30 PE=1 SV=1	0.793	0.047	0.682	0.482	0.127	0.608	2.718	0.708	0.186	-0.33	-4.42	-0.55	-1.05	-2.98	-0.72	1.44	-0.5	-2.43	0.995226	0.000370186	0.967673	0.661032	0.0015519	0.903317	0.924562	0.971469	0.0053379	191.6	152	8.9	130.7	92.5	24.3	2.72	8.69	80.65	17.92	19.78	69.26	191.2	196.9	186.4	137.6	163.8	151.7	8.9
RPNKQEESESPVERPLKENPPNK	1xDeamidated [N/Q]; 2xPhospho [S8; S10]	Q96SB4	SRSF protein kinase 1 OS=Homo sapiens OX=9606 GN=SRPK1 PE=1 SV=2	0.049	0.047	0.039	0.058	0.096	1.174	2.059	1.468	2.434	-4.34	-4.42	-4.66	-4.11	-3.38	0.23	1.04	0.55	1.28	0.118231	0.0390115	0.405278	0.185919	0.229202	0.999637	0.870564	0.991731	0.99783	465.2	23	21.7	18.4	27	44.7	22.96	85.91	105.87	149.06	47.46	58.64	419.4	280.8	442.5	45.7	20.7	5.1	49
RQSSPSCGPVAETSSIGNGDGISK	1xPhospho [S3]; 1xCarbamidomethyl [C7]	Q9Y4K4	Mitogen-activated protein kinase kinase kinase kinase 5 OS=Homo sapiens OX=9606 GN=MAP4K5 PE=1 SV=3	0.49	0.048	0.289	0.653	0.934	1.334	19.509	2.263	3.234	-1.03	-4.39	-1.79	-0.61	-0.1	0.42	4.29	1.18	1.69	0.949785	0.21877	0.983355	0.987336	0.999999	0.999864	0.191669	1	0.971324	175.8	86.1	8.4	50.7	114.9	164.1	128.07	12.68	155.56	158.44	9.46	135.43	411.1	24.6	63	25	32	30.8	3
RVGDPPQPLPEEPMEVQGAERASPEPQRENASPAPGTTAEEAMSR	2xPhospho [S23; S32]; 1xDeamidated [N/Q]	P46379	Large proline-rich protein BAG6 OS=Homo sapiens OX=9606 GN=BAG6 PE=1 SV=2	0.08	0.048	1.357	0.082	0.025	1.032	0.517	0.06	0.018	-3.65	-4.38	0.44	-3.61	-5.33	0.05	-0.95	-4.05	-5.77	0.353378	0.102416	0.999997	0.289904	0.0804891	0.999987	0.999987	0.335273	0.0959638	231.6	18.4	11.1	314.1	19	5.8	74.5	42.08	61.2	82.14	26.68	70.29	347.9	316.1	33.3	16.4	38.7	25.1	22.8
SPGSNSKVPEIEVTVEGPNNNNPQTSAVR	1xPhospho [S/T]	P78347	General transcription factor II-I OS=Homo sapiens OX=9606 GN=GTF2I PE=1 SV=2	1.006	0.049	0.686	1.197	1.272	1.19	25.963	1.745	1.854	0.01	-4.35	-0.54	0.26	0.35	0.25	4.7	0.8	0.89	1	0.934729	0.999997	0.96746	1	0.978904	0.942969	0.944925	1	115.2	115.9	5.6	79	137.9	146.5	87.83	81.55	160.77	90.23	9.93	85.58	183.1	3.4	127.9	128.7	147	6.1	6.3
FTEHNSSPNVSGSLSSGLQK	1xPhospho [S]	Q9UJF2	Ras GTPase-activating protein nGAP OS=Homo sapiens OX=9606 GN=RASAL2 PE=1 SV=2	0.68	0.049	1.185	0.034	0.029	0.05	0.581	0.029	0.024	-0.56	-4.34	0.24	-4.87	-5.12	-4.32	-0.78	-5.12	-5.37	0.999991	0.393275	0.994458	0.382191	0.246517	0.452205	0.999144	0.664327	0.480497	201.6	137	9.9	238.8	6.9	5.8	77.28	75.82	41.9	87.86	56.23	92.41	24.2	247.2	306.4	168.1	247.5	26.8	6.8
KTPEGRASPAPGSGHPEGPGAHLDMNSLDR	1xPhospho [S8]; 1xDeamidated [N26]	O94826	Mitochondrial import receptor subunit TOM70 OS=Homo sapiens OX=9606 GN=TOMM70 PE=1 SV=1	0.536	0.05	0.775	0.94	0.573	1.752	11.494	1.212	0.739	-0.9	-4.33	-0.37	-0.09	-0.8	0.81	3.52	0.28	-0.44	0.998391	0.204044	0.999997	0.788382	0.978753	0.942593	0.508845	0.841625	0.990128	154.9	83.1	7.7	120.1	145.6	88.7	24.11	38.38	41.01	1.29	93.12	90.11	166.1	103.4	159.8	62.1	132.5	85.7	5.5
AYSQEEITQGFEETGDTLYAPYSTHFQLQNQPPQKEFSIPR	2xDeamidated [Q]; 1xPhospho [S/T/Y]	Q8NFJ5	Retinoic acid-induced protein 3 OS=Homo sapiens OX=9606 GN=GPRC5A PE=1 SV=2	0.623	0.05	0.045	0.045	0.066	0.072	1.312	0.994	1.449	-0.68	-4.32	-4.47	-4.48	-3.93	-3.79	0.39	-0.01	0.54	0.871233	0.03251	0.420377	0.106593	0.0723083	0.501941	0.996129	0.925406	0.834845	328.1	204.4	16.4	14.8	14.7	21.5	8.79	82.78	80.67	155.76	14.05	71.7	291.1	321.6	270.2	181.3	262.7	14.5	16.5
SFEVEEVETPNSTPPR	1xPhospho [S/T]; 1xDeamidated [N11]	Q9UHD8	Septin-9 OS=Homo sapiens OX=9606 GN=SEPTIN9 PE=1 SV=2	0.319	0.05	0.069	0.318	0.329	0.998	6.563	4.646	4.794	-1.65	-4.32	-3.87	-1.65	-1.61	0	2.71	2.22	2.26	0.613947	0.0253697	0.125537	0.285201	0.616174	0.984405	0.319005	0.992678	0.828075	287.9	91.8	14.4	19.7	91.6	94.6	27.97	40.37	90.31	123.15	79.27	45.99	324.9	265.7	181.6	125.2	84.8	54.3	10
AETTPSMIPSQSR	1xPhospho [T4]	Q9H6B4	CXADR-like membrane protein OS=Homo sapiens OX=9606 GN=CLMP PE=1 SV=1	0.629	0.051	0.321	0.418	0.201	0.664	3.985	1.301	0.627	-0.67	-4.31	-1.64	-1.26	-2.31	-0.59	1.99	0.38	-0.67	0.983404	0.00869565	0.363077	0.56656	0.126586	0.901344	0.60988	0.998583	0.975044	229	144.1	11.6	73.6	95.7	46.1	9.58	16.49	135.54	20.15	16.19	59.78	211.9	185.2	223.9	174.2	131.6	133.3	10.7
DAPSGIGSIFLSASELEDGSEEMGQGAVSSSPR	1xPhospho [S]	O14879	Interferon-induced protein with tetratricopeptide repeats 3 OS=Homo sapiens OX=9606 GN=IFIT3 PE=1 SV=1	1.058	0.051	0.039	0.15	0.135	0.142	2.664	3.825	3.44	0.08	-4.3	-4.67	-2.74	-2.89	-2.82	1.41	1.94	1.78	0.971964	0.837444	0.438031	0.951645	0.38573	0.617121	0.95405	0.885486	0.999998	246.6	260.9	12.5	9.7	37	33.3	87.36	19.44	161.04	80.27	51.27	79.31	331.1	199.8	14.8	211.4	195.9	279.6	10.1
KSYESSEDCSEAAGSPAR	1xCarbamidomethyl [C9]; 1xPhospho [S/Y]	Q6P6C2	RNA demethylase ALKBH5 OS=Homo sapiens OX=9606 GN=ALKBH5 PE=1 SV=2	0.65	0.051	2.068	1.065	0.382	1.638	7.503	0.515	0.185	-0.62	-4.3	1.05	0.09	-1.39	0.71	2.91	-0.96	-2.44	0.922871	0.0138001	0.996867	1	0.404963	0.939275	0.329785	0.994552	0.217804	115.1	74.8	5.9	237.9	122.5	43.9	55.87	24.56	136.08	50.37	6.53	57.86	114.6	233.4	81.3	74.5	90.7	54.8	3.3
KLSSAMSAAK	1xPhospho [S]	P40925	Malate dehydrogenase, cytoplasmic OS=Homo sapiens OX=9606 GN=MDH1 PE=1 SV=4	0.988	0.051	0.62	0.111	0.072	0.113	1.399	0.18	0.116	-0.02	-4.29	-0.69	-3.17	-3.8	-3.15	0.48	-2.48	-3.11	0.999999	0.80333	1	0.999033	0.529121	0.997316	0.995451	0.999171	0.535394	211.1	208.6	10.8	130.9	23.5	15.1	89.84	84.13	158.15	77.11	125.49	84.73	6.3	206.9	325.5	11.4	283.9	204.5	175.6
DFAVLEDHTLAHSLQEQEIEHHLASNVQR	1xPhospho [S/T]; 1xDeamidated [Q]	Q8IVM0	Coiled-coil domain-containing protein 50 OS=Homo sapiens OX=9606 GN=CCDC50 PE=1 SV=1	0.21	0.051	0.176	0.189	0.015	0.901	0.296	1.076	0.086	-2.25	-4.29	-2.51	-2.4	-6.04	-0.15	-1.76	0.11	-3.53	0.998988	0.857318	0.994796	0.987977	0.187203	0.999819	0.725156	0.999998	0.380964	365.4	76.8	18.7	64.3	69.2	5.5	77.22	95.19	143.61	99.07	61.36	162.11	330.9	261.1	26.8	54.9	238.3	47.5	13.1
STMPTSLPNLAK	1xPhospho [S6]	Q04721	Neurogenic locus notch homolog protein 2 OS=Homo sapiens OX=9606 GN=NOTCH2 PE=1 SV=3	1.232	0.051	0.576	0.767	0.042	0.623	0.811	1.331	0.072	0.3	-4.28	-0.8	-0.38	-4.59	-0.68	-0.3	0.41	-3.79	0.992176	0.299826	0.932009	0.92673	0.198193	0.998544	0.99965	1	0.628067	163.6	201.5	8.4	94.3	125.5	6.8	9.52	80.42	154.51	76.31	83.17	3.75	192.5	160.7	187.9	253.5	12.4	231.5	9.6
RDPSSNDINGGMEPTPSTVSTPSPSADLLGLR	1xDeamidated [N]; 1xPhospho [S]	O95782	AP-2 complex subunit alpha-1 OS=Homo sapiens OX=9606 GN=AP2A1 PE=1 SV=3	0.61	0.052	0.877	0.994	0.791	1.629	15.329	1.134	0.902	-0.71	-4.28	-0.19	-0.01	-0.34	0.7	3.94	0.18	-0.15	0.997704	0.546984	0.775292	0.913808	0.998843	0.992014	0.755762	0.999401	0.928378	138.8	84.7	7.2	121.7	137.9	109.8	25.05	13.47	144.76	86.62	84.34	58.56	130.3	209.8	151.8	92.7	98.3	75.4	4
EQPEMEDANSEKSINEENGEVSEDQSQNK	2xPhospho [S10; S13]	Q13523	Serine/threonine-protein kinase PRP4 homolog OS=Homo sapiens OX=9606 GN=PRP4K PE=1 SV=3	0.493	0.052	0.319	0.598	0.331	1.212	6.39	1.877	1.038	-1.02	-4.27	-1.65	-0.74	-1.6	0.28	2.68	0.91	0.05	0.885697	0.0787172	0.631408	0.993646	0.491755	0.993508	0.794896	0.896353	0.999839	214.9	106	11.1	68.4	128.5	71.1	52.68	26.1	134.89	64.65	35.85	66.33	207.2	293.3	87.6	102.2	103.5	62.5	119.2
AGWGSPCHLSGESVILLGPTVGTESK	1xPhospho [S]; 1xCarbamidomethyl [C7]	Q7Z5J4	Retinoic acid-induced protein 1 OS=Homo sapiens OX=9606 GN=RAI1 PE=1 SV=2	0.117	0.052	0.177	0.075	0.133	0.639	2.575	0.423	0.752	-3.09	-4.27	-2.49	-3.73	-2.91	-0.65	1.36	-1.24	-0.41	0.954523	0.416932	0.846676	0.71834	0.979391	0.990665	0.797752	0.999811	0.996468	385.8	45.3	20	68.5	29	51.5	91.66	36.15	109.85	125.09	90.09	120.81	571.7	323.2	16.1	36.6	38	66.7	16.7
SQEMVHLVNKESSETPDQFMTADETR	1xPhospho [S/T]	P16070	CD44 antigen OS=Homo sapiens OX=9606 GN=CD44 PE=1 SV=3	0.886	0.052	0.925	1.331	0.052	1.503	0.998	1.439	0.056	-0.18	-4.27	-0.11	0.41	-4.27	0.59	0	0.52	-4.16	0.999867	0.0365301	0.69072	0.999293	0.0215007	0.991207	0.999477	0.500838	0.231789	141.3	125.2	7.3	130.8	188.1	7.3	9.72	15.05	25.47	85.9	14.03	84.41	166.2	136.8	150.3	103.1	137.6	133.1	6.1
KADGEDAGAESNEEAPGEPSAGSSEEAPGEPSAGSSEEAPGER	1xPhospho [S]	Q8N8A6	ATP-dependent RNA helicase DDX51 OS=Homo sapiens OX=9606 GN=DDX51 PE=1 SV=3	1.018	0.052	1.322	1.243	0.977	1.221	18.841	0.94	0.739	0.03	-4.27	0.4	0.31	-0.03	0.29	4.24	-0.09	-0.44	0.999952	0.0278251	0.997851	0.999924	0.999861	0.998223	0.0185733	0.999928	0.999964	106.9	108.8	5.5	141.3	132.9	104.5	46.1	45.46	143.37	26.1	41.44	38.26	157.7	59.2	103.9	132.3	47.6	105.7	2.3
TEEPLGSPHPSGTVESPGEGPQDTR	1xPhospho [S/T]	Q9NWS9	Zinc finger protein 446 OS=Homo sapiens OX=9606 GN=ZNF446 PE=1 SV=1	0.717	0.052	1.095	0.084	1.09	0.117	21.023	0.076	0.996	-0.48	-4.27	0.13	-3.58	0.12	-3.1	4.39	-3.71	-0.01	0.693241	0.0898247	0.999999	0.163296	0.997043	0.843229	0.182966	0.144192	0.993676	148.6	106.5	7.7	162.7	12.4	162	21.7	92.66	23.65	23.58	38.15	73.93	176.1	173.5	116.4	124.3	205.6	1.9	9
EASPAPLAQGEPGREDLPTR	1xPhospho [S3]	Q9P1Y6	PHD and RING finger domain-containing protein 1 OS=Homo sapiens OX=9606 GN=PHRF1 PE=1 SV=3	0.025	0.052	1.26	1.153	1.114	45.67	21.301	0.915	0.884	-5.31	-4.26	0.33	0.21	0.16	5.51	4.41	-0.13	-0.18	0.0521143	0.0351825	0.999904	0.999989	0.999998	0.0410606	0.0294643	0.999999	0.999996	130.3	3.3	6.8	164.2	150.2	145.2	64.9	140.64	136.57	17.58	13.74	11.15	114.4	245.2	67	2.9	39.8	2.8	6
YLPGAITSPDEHILTPDSSFSKSPESLPGPALEDIAIK	1xPhospho [S]	P78559	Microtubule-associated protein 1A OS=Homo sapiens OX=9606 GN=MAP1A PE=1 SV=6	0.212	0.052	0.878	0.369	0.312	1.739	5.949	0.42	0.355	-2.24	-4.25	-0.19	-1.44	-1.68	0.8	2.57	-1.25	-1.49	0.855594	0.277204	0.999969	1	0.990254	0.870697	0.564829	0.999922	0.969224	212.5	45	11.1	186.7	78.3	66.3	57.5	83.22	139.84	30.7	149.67	40.14	142.5	145.9	36.4	30.2	77.2	12.8	7.5
EYGSTSSIDKQGTSGESFFDLLK	2xPhospho [S/T/Y]	O43166	Signal-induced proliferation-associated 1-like protein 1 OS=Homo sapiens OX=9606 GN=SIPA1L1 PE=1 SV=4	0.259	0.052	0.504	0.135	0.045	0.522	0.85	0.268	0.089	-1.95	-4.25	-0.99	-2.89	-4.49	-0.94	-0.23	-1.9	-3.5	0.783552	0.208761	0.572451	0.294687	0.0597569	0.930448	0.964733	0.992376	0.624507	300.7	78	15.8	151.5	40.7	13.4	35	72.28	149.51	75.63	38.76	119.09	381.7	198.9	240.6	62.4	50.4	176.8	12.6
AGPGSSPLFSLLPGYR	1xPhospho [S]	Q9H0W8	Nonsense-mediated mRNA decay factor SMG9 OS=Homo sapiens OX=9606 GN=SMG9 PE=1 SV=1	0.994	0.053	0.156	0.198	0.06	0.199	1.148	1.269	0.388	-0.01	-4.25	-2.68	-2.34	-4.05	-2.33	0.2	0.34	-1.37	0.999998	0.0321998	0.364483	0.57195	0.041713	0.631096	0.999984	0.998467	0.725528	243.9	242.5	12.8	38	48.2	14.7	20.94	7.48	118.01	118.77	95.43	104.1	175.8	261.1	197.8	196.6	177.4	205.7	4.2
TLENSPISSCDTSDTEGPVPVNSAAVLK	1xDeamidated [N4]; 1xCarbamidomethyl [C10]; 1xPhospho [S/T]	Q8N556	Actin filament-associated protein 1 OS=Homo sapiens OX=9606 GN=AFAP1 PE=1 SV=2	0.053	0.053	0.043	0.07	1.072	1.321	20.347	1.615	24.85	-4.25	-4.25	-4.54	-3.84	0.1	0.4	4.35	0.69	4.64	0.267071	0.0505262	0.358738	0.129739	1	0.996015	0.0509004	0.978512	0.360781	262	13.8	13.8	11.3	18.2	280.8	13.59	154.84	66.34	155.9	19.79	19.82	209.7	233.5	177.5	4.5	204.2	11.1	2.7
SISEIKPPNLFPLAPQEITHCHDEDDDEEEEEEEE	1xPhospho [S3]; 2xDeamidated [N9; Q16]; 1xCarbamidomethyl [C21]	P49902	Cytosolic purine 5'-nucleotidase OS=Homo sapiens OX=9606 GN=NT5C2 PE=1 SV=1	0.196	0.053	1.449	1.464	0.177	7.468	3.318	1.011	0.122	-2.35	-4.23	0.53	0.55	-2.5	2.9	1.73	0.02	-3.03	0.994266	0.163733	0.998163	0.869928	0.989061	0.598642	0.382129	0.978623	0.906892	138.3	27.1	7.4	200.3	202.4	24.5	73.51	133.73	63.24	76.71	28.18	136.76	115.6	152.3	17.2	22.7	15	209.9	11.5
FLNRSPEESFDIK	2xPhospho [S5; S9]	Q96S38	Ribosomal protein S6 kinase delta-1 OS=Homo sapiens OX=9606 GN=RPS6KC1 PE=1 SV=2	0.983	0.053	0.986	1.049	0.644	1.067	12.059	1.064	0.653	-0.02	-4.23	-0.02	0.07	-0.64	0.09	3.59	0.09	-0.62	1	0.561335	0.705832	1	0.951707	1	0.953399	0.681665	0.989921	127.3	125.1	6.8	125.5	133.5	81.9	12.14	12.68	138.19	86.18	10.4	73.7	148.3	137.6	116.3	135.3	140.9	110.2	6.6
MGQAGSTISNSHAQPFDFPDDNQNSKK	1xPhospho [S/T]	P17302	Gap junction alpha-1 protein OS=Homo sapiens OX=9606 GN=GJA1 PE=1 SV=2	0.828	0.054	1.04	1.273	1.731	1.538	32.329	1.224	1.664	-0.27	-4.22	0.06	0.35	0.79	0.62	5.01	0.29	0.73	0.999943	0.147318	0.986632	0.999996	0.999989	0.999445	0.117487	0.971797	0.96756	101.3	83.8	5.4	105.3	128.9	175.3	14.36	28.28	146.36	78.18	46.74	55.5	94	124.4	104.5	72.3	86.4	123.9	5.6
ELSNSPLRENSFGSPLEFR	2xPhospho [S]; 1xDeamidated [N]	Q9UQ35	Serine/arginine repetitive matrix protein 2 OS=Homo sapiens OX=9606 GN=SRRM2 PE=1 SV=2	3.197	0.054	3.121	1.484	3.16	0.464	59.017	0.475	1.012	1.68	-4.22	1.64	0.57	1.66	-1.11	5.88	-1.07	0.02	0.983048	0.98452	0.994472	0.993944	0.984725	0.834387	0.782679	0.894615	0.999993	49.9	159.7	2.7	155.9	74.1	157.8	166.06	140.57	172.88	148.36	86.4	142.45	1.2	286.3	7	22.3	20.1	295.1	0.2
SLSTNGENMGLAVQYLDPR	1xPhospho [S/T]; 1xDeamidated [N]	Q99759	Mitogen-activated protein kinase kinase kinase 3 OS=Homo sapiens OX=9606 GN=MAP3K3 PE=1 SV=2	0.013	0.054	0.053	0.05	0.071	3.889	1.328	0.944	1.33	-6.27	-4.22	-4.23	-4.31	-3.81	1.96	0.41	-0.08	0.41	0.274355	0.185805	0.472765	0.126419	0.223887	0.994454	0.999994	0.927419	0.991395	483.3	6.3	25.9	25.8	24.4	34.4	60.2	169.23	39.15	157.22	61.1	41.09	157.5	522.7	259.1	3.4	424.9	3.2	13.9
RVVLGDGVQLPPGDYSTTPGGTLFSTTPGGTR	1xDeamidated [Q9]; 2xPhospho [S/T/Y]	Q13541	Eukaryotic translation initiation factor 4E-binding protein 1 OS=Homo sapiens OX=9606 GN=EIF4EBP1 PE=1 SV=3	0.753	0.054	1.965	1.681	0.573	2.234	10.608	0.856	0.291	-0.41	-4.21	0.97	0.75	-0.8	1.16	3.41	-0.22	-1.78	0.998957	0.13668	0.975485	0.999922	0.528681	0.990927	0.911124	0.994846	0.207671	99.6	75	5.4	195.7	167.4	57	66.48	25.06	148.13	39.56	36.91	83.14	93.1	204.7	54.4	90.5	70.1	54.7	54.9
SLSSSPQAQPPRPAELSDEEVAELFQR	1xPhospho [S]; 1xDeamidated [Q]	Q4V328	GRIP1-associated protein 1 OS=Homo sapiens OX=9606 GN=GRIPAP1 PE=1 SV=2	1.069	0.054	0.96	0.084	0.069	0.079	1.28	0.088	0.072	0.1	-4.21	-0.06	-3.57	-3.85	-3.67	0.36	-3.51	-3.79	0.999634	0.901762	1	0.993835	0.993485	0.999868	0.995748	0.992878	0.992488	185.3	198.2	10	178	15.6	12.9	82.06	84.97	153.83	81.04	141.16	144.45	9.2	221.1	181.3	193.8	2.5	197	9.8
VLSLQGR	1xPhospho [S3]	Q8N5J2	Ubiquitin carboxyl-terminal hydrolase MINDY-1 OS=Homo sapiens OX=9606 GN=MINDY1 PE=1 SV=2	0.438	0.054	0.43	0.584	0.778	1.335	14.318	1.36	1.81	-1.19	-4.2	-1.22	-0.78	-0.36	0.42	3.84	0.44	0.86	0.833983	0.0754818	0.956966	0.947806	0.885573	0.999398	0.373767	1	0.999856	182.7	80	9.9	78.5	106.8	142.1	44.55	51.36	146.8	38.54	67.57	68.39	175	279.8	113	76.6	34.6	110.3	105.1
WAHDKFSGEEGEIEDDESGTENREEKDNIQPTTE	1xPhospho [S/T]; 1xDeamidated [N/Q]	Q9Y2W1	Thyroid hormone receptor-associated protein 3 OS=Homo sapiens OX=9606 GN=THRAP3 PE=1 SV=2	0.082	0.054	1.308	1.115	0.147	13.524	2.702	0.853	0.112	-3.6	-4.2	0.39	0.16	-2.77	3.76	1.43	-0.23	-3.15	0.953114	0.851262	0.997667	0.999998	0.995299	0.927056	0.984108	0.99935	0.931927	161.9	13.3	8.8	211.7	180.5	23.8	97.02	152.95	161.19	141.69	69.67	116.7	87.3	5.6	185.3	109.6	7.2	2.1	112.4
SLKQPLEQNQTISPLSTYEESK	1xPhospho [S/T]	Q9UQR1	Zinc finger protein 148 OS=Homo sapiens OX=9606 GN=ZNF148 PE=1 SV=2	0.024	0.055	0.08	0.934	1.204	38.911	22.08	11.686	15.065	-5.38	-4.2	-3.65	-0.1	0.27	5.28	4.46	3.55	3.91	0.345152	0.601183	0.688159	0.931101	0.999782	0.839283	0.454992	0.993195	0.538336	182	4.4	9.9	14.5	170	219.2	23.23	163.63	116.78	151.36	83.98	19.62	177	110.4	160.4	3.9	1.2	133	61.8
KDEWGLVAPISPGPLTPMR	1xPhospho [S11]	P11137	Microtubule-associated protein 2 OS=Homo sapiens OX=9606 GN=MAP2 PE=1 SV=4	0.117	0.055	0.152	0.043	0.064	0.366	1.177	0.282	0.425	-3.1	-4.19	-2.72	-4.55	-3.96	-1.45	0.24	-1.83	-1.24	0.0495117	0.00801219	0.0822011	0.00399694	0.023676	0.668075	0.9849	0.494463	0.972116	419.6	49	22.9	63.6	17.9	27	21.2	16.25	31.21	22.96	129.49	89.2	493.6	375.3	329.5	43.8	37.3	51.7	16.5
RESRQESDPEDDDVKKPALQSSVVATSK	1xPhospho [S]	Q9H307	Pinin OS=Homo sapiens OX=9606 GN=PNN PE=1 SV=5	0.196	0.055	0.364	0.672	0.592	3.431	10.826	1.846	1.626	-2.35	-4.19	-1.46	-0.57	-0.76	1.78	3.44	0.88	0.7	0.673934	0.41019	0.985203	0.999999	0.993251	0.7186	0.709233	0.991817	0.999998	208.5	40.8	11.4	75.9	140.1	123.4	65.67	60.95	152.93	28.1	58.42	79.22	218.9	40.8	239.7	42.9	58.8	12.9	12
GATMNEDSNEEEEESENDWEEVEELSEPVLGDVR	2xPhospho [S8; S15]; 1xDeamidated [N]	Q01831	DNA repair protein complementing XP-C cells OS=Homo sapiens OX=9606 GN=XPC PE=1 SV=4	1.105	0.055	0.302	0.262	1.303	0.237	23.719	0.867	4.314	0.14	-4.19	-1.73	-1.93	0.38	-2.08	4.57	-0.21	2.11	0.999545	0.21923	0.963204	0.80302	1	0.9254	0.209805	0.996759	0.957215	149	164.6	8.2	45	39	194.1	60.67	74.49	110.09	114.1	121.01	63.96	218.2	47.9	164.2	184.3	181.4	17.9	30.2
ENSPAAFPDR	1xPhospho [S3]	Q9Y5B0	RNA polymerase II subunit A C-terminal domain phosphatase OS=Homo sapiens OX=9606 GN=CTDP1 PE=1 SV=3	0.466	0.055	1.016	0.807	0.908	1.731	16.476	0.794	0.894	-1.1	-4.18	0.02	-0.31	-0.14	0.79	4.04	-0.33	-0.16	0.867011	0.0974751	0.999996	1	0.999993	0.895011	0.120195	0.999955	0.999833	141.1	65.8	7.8	143.4	113.9	128.1	21.37	89.19	150.57	10.07	30.84	4.07	95.7	122.7	147.9	151.5	57.2	19.7	6.8
QDVVGKTPPSTTVGSHSPPETPVLTR	2xPhospho [S/T]	Q9ULU4	MYND-type zinc finger-containing chromatin reader ZMYND8 OS=Homo sapiens OX=9606 GN=ZMYND8 PE=1 SV=2	0.853	0.055	0.616	0.248	0.366	0.291	6.625	0.403	0.595	-0.23	-4.18	-0.7	-2.01	-1.45	-1.78	2.73	-1.31	-0.75	1	0.513622	0.992891	0.73799	0.705655	0.749413	0.999256	0.954994	0.940992	191.2	163	10.6	117.8	47.5	70	50.65	44.49	150.58	51.06	117.9	76.37	193.7	224.7	69.2	214.1	79.6	165.2	6
REQGGSGLGSGSSGGGGSTSGLGSGYIGR	1xPhospho [S]	Q2M2I8	AP2-associated protein kinase 1 OS=Homo sapiens OX=9606 GN=AAK1 PE=1 SV=3	1.085	0.056	0.031	0.063	0.086	0.058	1.557	2.033	2.773	0.12	-4.17	-5	-3.98	-3.53	-4.1	0.64	1.02	1.47	0.99937	0.860473	0.63904	0.662741	0.858769	0.478186	1	1	0.997815	258.4	280.5	14.4	8.1	16.4	22.3	79.79	65.97	152.01	150.32	130.06	96.38	298.1	266.2	16.2	289	316.2	53	4.2
ATMAQNENVVVQPVVAENIPVIPLSDSPPPSR	1xDeamidated [N/Q]; 1xPhospho [S]	P30414	NK-tumor recognition protein OS=Homo sapiens OX=9606 GN=NKTR PE=1 SV=2	1.062	0.056	0.071	0.06	1.355	0.056	24.373	0.843	19.156	0.09	-4.17	-3.82	-4.07	0.44	-4.15	4.61	-0.25	4.26	0.853246	0.22609	0.760829	0.192741	0.996686	0.740883	0.42057	0.83669	0.945662	166.5	176.8	9.3	11.8	9.9	225.7	12.88	86.54	87.46	149.27	74.52	79.84	219.8	175.6	178.7	189.8	1.3	220.6	1.3
VSGPDPKPGSNCSPAQSVLSEVPSVPTNGMAK	1xCarbamidomethyl [C12]; 1xPhospho [S]; 1xDeamidated [N28]	P22314	Ubiquitin-like modifier-activating enzyme 1 OS=Homo sapiens OX=9606 GN=UBA1 PE=1 SV=3	1.16	0.056	0.887	0.72	0.427	0.621	7.662	0.813	0.481	0.21	-4.17	-0.17	-0.47	-1.23	-0.69	2.94	-0.3	-1.05	0.999993	0.0225881	0.993841	0.979584	0.907772	0.95743	0.119909	0.999979	0.996174	141.2	163.8	7.9	125.2	101.7	60.2	32.84	5.17	147.96	26.83	17.51	51.03	131	201.1	108.7	165	152	150.3	7.3
DSFIENSSSNCTSGSSKPNSPSISPSILSNTEHK	1xCarbamidomethyl [C11]; 3xPhospho [S]	Q99700	Ataxin-2 OS=Homo sapiens OX=9606 GN=ATXN2 PE=1 SV=2	0.453	0.056	1.345	1.422	0.55	3.14	9.869	1.057	0.409	-1.14	-4.16	0.43	0.51	-0.86	1.65	3.3	0.08	-1.29	0.850714	0.235783	0.986902	0.99946	0.991595	0.689273	0.490488	0.928074	1	124.3	56.3	6.9	167.2	176.8	68.4	15.43	86.75	154.49	78.48	17.17	47.54	110.5	148.1	120.3	118.2	54.5	12.1	2.9
ECTNILEGDESDSLTDYDIVGGK	1xCarbamidomethyl [C2]; 1xPhospho [S/T]	Q03001	Dystonin OS=Homo sapiens OX=9606 GN=DST PE=1 SV=4	0.203	0.056	0.082	0.09	1.288	0.441	23.082	1.088	15.626	-2.3	-4.16	-3.6	-3.48	0.37	-1.18	4.53	0.12	3.97	0.996421	0.765074	0.983224	0.986005	0.959837	0.871004	0.330384	1	0.686806	220.6	44.9	12.3	18.2	19.8	284.2	86.9	122.35	47.41	22.67	35.57	78.28	1.6	242.1	290.8	49.2	350.9	36.3	13.5
GLVGGQEEASQEAGLPAGAGPSPTFPALGIGMDSCVIPLR	1xPhospho [S/T]; 1xCarbamidomethyl [C35]	Q99611	Selenide, water dikinase 2 OS=Homo sapiens OX=9606 GN=SEPHS2 PE=1 SV=3	0.185	0.056	0.279	0.149	0.062	0.802	1.104	0.532	0.222	-2.43	-4.15	-1.84	-2.75	-4.01	-0.32	0.14	-0.91	-2.17	0.0952303	0.020736	0.281942	0.229793	0.0126133	0.991386	0.999613	0.999989	0.436447	346.6	64.2	19.5	96.7	51.5	21.5	38	58.38	126.53	42.71	52.47	88.41	516.7	260.4	304.6	64.3	15.1	56.5	95.6
MESLSSHRIDEDGENTQIEDTEPMSPVLNSK	1xPhospho [S25]	Q12888	TP53-binding protein 1 OS=Homo sapiens OX=9606 GN=TP53BP1 PE=1 SV=2	0.589	0.056	0.644	2.127	0.82	3.607	14.565	3.304	1.274	-0.76	-4.15	-0.64	1.09	-0.29	1.85	3.86	1.72	0.35	0.999999	0.942584	1	0.912248	0.984557	0.882889	0.650815	0.924702	0.988315	114.6	67.6	6.5	73.8	243.7	94	116.49	82.84	150.79	89	69.25	53.08	342.9	106.2	1.4	95.5	5.9	62.6	2.3
MLPHAPGVQMQAIPEDAIPEESGDEDEDDPDKR	2xDeamidated [Q9; Q11]; 1xPhospho [S22]	Q13547	Histone deacetylase 1 OS=Homo sapiens OX=9606 GN=HDAC1 PE=1 SV=1	1.102	0.056	1.293	1.332	1.253	1.209	22.229	1.03	0.969	0.14	-4.15	0.37	0.41	0.33	0.27	4.47	0.04	-0.04	0.978131	0.424293	0.94096	0.967723	0.999917	1	0.322687	0.999995	0.981155	99.4	109.5	5.6	128.5	132.4	124.6	69.12	8.85	158.7	16.68	27.49	67.59	16.5	107	117.5	104	123.9	117.9	6
GGQSDDDEDEGVPASYHTVSLQVSQDLLDLMHTLHTR	1xDeamidated [Q]; 1xPhospho [S4]	Q92538	Golgi-specific brefeldin A-resistance guanine nucleotide exchange factor 1 OS=Homo sapiens OX=9606 GN=GBF1 PE=1 SV=3	2.139	0.056	0.022	0.061	0.14	0.028	2.49	2.814	6.505	1.1	-4.15	-5.53	-4.04	-2.83	-5.14	1.32	1.49	2.7	0.946941	0.837682	0.407564	0.965905	0.996078	0.585153	0.978146	0.830762	0.67262	175.5	375.5	9.9	3.8	10.7	24.6	84.2	36.18	163.67	106.23	162.15	158.25	177.2	11.3	108.3	148.3	231.7	316.2	1
KAEQGSEEEGEGEEEEEEGGESKADDPYAHLSK	1xPhospho [S6]	Q8NE71	ATP-binding cassette sub-family F member 1 OS=Homo sapiens OX=9606 GN=ABCF1 PE=1 SV=2	0.313	0.057	0.629	0.517	1.028	1.653	18.194	0.823	1.635	-1.68	-4.15	-0.67	-0.95	0.04	0.73	4.19	-0.28	0.71	0.864112	0.525303	0.948089	0.998486	1	0.974355	0.521531	0.996286	0.946462	169.3	53	9.6	106.5	87.6	174.1	56.44	70.96	158.13	81.23	53.91	60.22	190.9	51	196.7	75.2	59.7	9.7	10.8
KASALLFSSDEEDQWNIPASQTHLASDSR	1xPhospho [S9]; 1xDeamidated [N/Q]	Q9Y4E1; Q641Q2	WASH complex subunit 2C OS=Homo sapiens OX=9606 GN=WASHC2C PE=1 SV=5 WASH complex subunit 2A OS=Homo sapiens OX=9606 GN=WASHC2A PE=1 SV=3	0.114	0.057	0.06	0.712	0.131	6.227	2.322	11.94	2.2	-3.13	-4.14	-4.07	-0.49	-2.93	2.64	1.22	3.58	1.14	0.636058	0.0495429	0.275751	0.970072	0.568071	0.961141	0.56451	0.661092	0.989526	289.3	33.1	16.4	17.3	206.1	38	30.64	121.22	48.37	146.88	65.83	124.04	280.4	225	147.6	25.7	25.6	205.3	5.1
EYSPPYAPSHQQYPPSHATPLPK	1xPhospho [S/Y]; 1xDeamidated [Q]	Q9UPT8	Zinc finger CCCH domain-containing protein 4 OS=Homo sapiens OX=9606 GN=ZC3H4 PE=1 SV=3	0.046	0.057	0.04	0.014	0.055	0.306	0.975	0.351	1.38	-4.45	-4.14	-4.64	-6.15	-4.18	-1.71	-0.04	-1.51	0.46	0.983694	0.902289	0.995325	0.397845	0.998759	0.759483	0.984861	0.671985	0.999995	495.1	22.7	28	19.8	6.9	27.3	86.46	159.07	20.27	162.8	67.17	159	3.5	263.1	323.9	4.2	12.1	281.2	10.8
IRQPSVDLTDDDQTSSVPHSAISDIMSSDQETYSCKPHGR	1xPhospho [S5]; 1xDeamidated [Q]; 1xCarbamidomethyl [C35]	Q5SW79	Centrosomal protein of 170 kDa OS=Homo sapiens OX=9606 GN=CEP170 PE=1 SV=1	0.11	0.057	0.824	0.086	0.955	0.775	16.79	0.104	1.16	-3.18	-4.14	-0.28	-3.55	-0.07	-0.37	4.07	-3.27	0.21	0.995749	0.952827	0.998698	0.986469	1	0.99999	0.945539	0.999829	0.998109	197.9	21.9	11.3	163	16.9	189	76.04	133.83	151.21	93.73	146.52	73.29	167.6	185.2	15.5	200.1	17.2	18.5	189.9
LGSPVDNLEDMDRDDLTDDSVFTR	1xPhospho [S3]	Q5VUA4	Zinc finger protein 318 OS=Homo sapiens OX=9606 GN=ZNF318 PE=1 SV=2	0.067	0.057	0.058	0.088	0.07	1.312	1.225	1.528	1.208	-3.89	-4.14	-4.12	-3.5	-3.84	0.39	0.29	0.61	0.27	0.844425	0.729084	0.959769	0.98949	0.61074	0.991165	0.999928	0.999913	0.963456	447.8	30.1	25.5	25.8	39.5	31.2	86.85	157.37	60.34	151.95	136.88	70.8	426.8	293.6	11.7	19.7	323.4	1.5	16.7
RPASMAVMEGDLVKK	1xPhospho [S4]	Q68EM7	Rho GTPase-activating protein 17 OS=Homo sapiens OX=9606 GN=ARHGAP17 PE=1 SV=1	0.081	0.057	0.08	0.098	0.118	1.213	2.065	1.228	1.472	-3.63	-4.13	-3.64	-3.35	-3.09	0.28	1.05	0.3	0.56	0.301329	0.315096	0.866945	0.53338	0.245213	0.996472	0.999966	0.986625	0.808638	418.4	33.9	23.9	33.5	41.1	49.3	73.66	50.72	63.54	148.39	37.44	77.08	414.3	399.7	42.8	39.2	32.4	12	22.8
AETASQSQRSPISDNSGCDAPGNSNPSLSVPSSAESEK	1xPhospho [S]; 1xDeamidated [N]; 1xCarbamidomethyl [C18]	Q99590	Protein SCAF11 OS=Homo sapiens OX=9606 GN=SCAF11 PE=1 SV=2	0.977	0.057	0.963	1.001	0.931	1.025	16.189	1.04	0.967	-0.03	-4.12	-0.06	0	-0.1	0.04	4.02	0.06	-0.05	1	0.0234157	0.93628	0.913494	0.968207	0.935799	0.0845308	1	0.999989	121.7	118.9	7	117.2	121.9	113.3	17.51	21.9	80.05	76.43	80.86	70.1	184.4	139.2	136.7	177.6	136	116.1	0.5
SISLGDSEGPIVATLAQPLR	1xPhospho [S]	O43379	WD repeat-containing protein 62 OS=Homo sapiens OX=9606 GN=WDR62 PE=1 SV=4	1.122	0.058	1.214	1.19	1.574	1.06	27.321	0.98	1.297	0.17	-4.12	0.28	0.25	0.65	0.08	4.77	-0.03	0.37	0.789095	0.960748	0.748234	0.750998	0.657494	1	0.254323	1	0.999979	97.4	109.4	5.6	118.3	115.9	153.4	87.43	15	158.58	0.58	19.59	11.94	124.3	1	96.9	123.3	91.1	108.7	1.1
AVQQHQHGYDSDEEVDSELGTWEHQLR	1xDeamidated [Q]; 1xPhospho [S11]	Q8IWZ8	SURP and G-patch domain-containing protein 1 OS=Homo sapiens OX=9606 GN=SUGP1 PE=1 SV=2	0.031	0.058	1.11	0.233	0.842	7.556	14.569	0.21	0.759	-5.02	-4.11	0.15	-2.1	-0.25	2.92	3.86	-2.25	-0.4	0.482433	0.982781	0.999998	0.8515	0.998041	0.9806	0.88125	0.80641	0.999461	183.3	5.6	10.6	203.4	42.7	154.3	80.74	55.79	143.36	81.44	132.4	112.22	185.7	9.4	154.6	4.8	1.3	4.9	8.9
APVSSTESVIQSNTPTPPPSQPLNETAEEESR	1xDeamidated [N/Q]; 1xPhospho [T16]	Q9HC35	Echinoderm microtubule-associated protein-like 4 OS=Homo sapiens OX=9606 GN=EML4 PE=1 SV=3	0.671	0.058	0.057	0.109	0.096	0.163	1.659	1.914	1.677	-0.58	-4.11	-4.13	-3.19	-3.38	-2.62	0.73	0.94	0.75	0.960544	0.303783	0.645462	0.41364	0.760606	0.848872	0.94792	0.9979	0.999931	301.3	202.2	17.4	17.2	33	28.9	26.75	83.58	33.43	149.28	143.71	132.99	266.9	153.5	216.4	14.7	145.2	230.8	12.5
LLLAEDSEEEVDFLSER	1xPhospho [S7]	Q14676	Mediator of DNA damage checkpoint protein 1 OS=Homo sapiens OX=9606 GN=MDC1 PE=1 SV=3	0.064	0.058	0.159	0.905	0.108	14.075	1.874	5.678	0.681	-3.96	-4.11	-2.65	-0.14	-3.2	3.82	0.91	2.51	-0.55	0.678279	0.253494	0.856915	0.781528	0.578271	0.999955	0.981984	0.999981	0.994044	261.5	16.8	15.1	41.7	236.5	28.4	39.01	158.76	76.95	132.87	92.79	18.25	336.2	168.9	192.2	283.1	4.4	12.3	1.9
KATEDFLGSSSGYSSEDDYVGYSDVDQQSSSSR	1xPhospho [S/Y]; 1xDeamidated [Q]	Q9UH99	SUN domain-containing protein 2 OS=Homo sapiens OX=9606 GN=SUN2 PE=1 SV=3	0.262	0.058	0.665	0.563	0.113	2.15	1.941	0.846	0.169	-1.93	-4.11	-0.59	-0.83	-3.15	1.1	0.96	-0.24	-2.56	0.683183	0.0346558	0.885661	0.926254	0.468345	0.993636	0.545676	0.999995	0.96354	225.6	59	13.1	150	126.9	25.4	19.57	89.71	103.17	75.69	49.13	108.77	156.5	227.3	222.6	24	166.6	58.3	3
MHSEAEESKEVATDVFNSK	1xAcetyl [N-Term]; 1xPhospho [S3]	O95379	Tumor necrosis factor alpha-induced protein 8 OS=Homo sapiens OX=9606 GN=TNFAIP8 PE=1 SV=1	0.216	0.058	0.993	0.161	0.023	0.745	0.389	0.162	0.023	-2.21	-4.11	-0.01	-2.64	-5.47	-0.43	-1.36	-2.63	-5.46	0.910175	0.0923346	1	0.764698	0.139213	0.999312	0.999803	0.786154	0.148552	244.9	52.9	14.2	243.2	39.4	5.5	72.93	109.07	60.89	56.68	115.22	145.52	352	221.4	49.9	23.9	215.7	47.8	12.9
QLAYSTVGTPDYIAPEVFMQTGYNK	1xDeamidated [Q1]; 1xPhospho [S/T/Y]	Q9Y2H1	Serine/threonine-protein kinase 38-like OS=Homo sapiens OX=9606 GN=STK38L PE=1 SV=3	1.072	0.058	0.179	0.177	0.147	0.165	2.523	0.989	0.82	0.1	-4.1	-2.48	-2.5	-2.77	-2.6	1.34	-0.02	-0.29	0.998974	0.861185	0.880867	0.997461	0.999955	0.962637	0.928941	0.985178	0.942203	227.9	244.3	13.3	40.8	40.4	33.4	84.23	67.11	85.14	132.35	122.42	118.09	268.1	7.6	213.6	236.9	229	37.9	37.9
VSTETSSPLSPPAVPPPPVPVLPGAVPSQTER	1xPhospho [S]; 1xDeamidated [Q29]	Q13671	Ras and Rab interactor 1 OS=Homo sapiens OX=9606 GN=RIN1 PE=1 SV=4	1.346	0.058	1.518	0.072	2.166	0.053	37.141	0.047	1.427	0.43	-4.1	0.6	-3.81	1.11	-4.23	5.21	-4.41	0.51	0.999976	0.684052	0.999999	0.962162	0.868189	0.986085	0.174144	0.97753	0.827274	97.4	131.1	5.7	147.9	7	211	78.92	84.92	13.03	85.03	155.77	1.97	131.1	8.5	108.1	145.4	2.5	163	5.4
LHYTPPLQSPIIDNDPLLGQSPWR	2xDeamidated [Q8; N14]; 1xPhospho [S9]	Q5TKA1	Protein lin-9 homolog OS=Homo sapiens OX=9606 GN=LIN9 PE=1 SV=1	0.172	0.058	0.088	0.318	0.13	1.844	2.228	3.627	1.486	-2.54	-4.1	-3.51	-1.65	-2.94	0.88	1.16	1.86	0.57	0.99282	0.289413	0.633169	0.810305	0.846567	0.979303	0.881398	0.999365	0.998222	339.6	58.6	19.9	29.8	108	44.2	79.78	143.27	76.41	59.27	82.39	102.89	25.5	393.4	300.3	514.8	51.8	16	24.3
DAEYIYPSLESDDDDPALK	1xPhospho [S]	Q9UPP1	Histone lysine demethylase PHF8 OS=Homo sapiens OX=9606 GN=PHF8 PE=1 SV=3	0.079	0.059	0.18	0.092	0.295	1.164	5.043	0.511	1.641	-3.66	-4.1	-2.48	-3.44	-1.76	0.22	2.33	-0.97	0.71	0.125649	0.0345587	0.540542	0.29758	0.973473	0.990656	0.116455	0.995636	0.911562	352	27.8	20.6	63.3	32.4	103.9	77.85	82.86	78.83	51.06	94.4	88.51	513.4	55.9	314.7	24.9	8.2	57.4	30.7
GTEPSPGGTPQPSRPVSPAGPPEGVPEEAQPPR	1xPhospho [S/T]	Q8WUZ0	B-cell CLL/lymphoma 7 protein family member C OS=Homo sapiens OX=9606 GN=BCL7C PE=1 SV=3	0.765	0.059	1.141	1.06	0.415	1.386	6.993	0.929	0.363	-0.39	-4.08	0.19	0.08	-1.27	0.47	2.81	-0.11	-1.46	0.998978	0.00654716	0.99683	0.998468	0.236778	0.970558	0.309484	1	0.117684	135.1	103.3	8	154.2	143.3	56	42.19	21.97	52.55	41.22	16.04	81.94	139.4	174.9	69	115.3	74.1	106.6	15.4
SHSGTSPDNTAPPPPPPRPQPSHSR	3xPhospho [S3; S6; S22]	Q96D71	RalBP1-associated Eps domain-containing protein 1 OS=Homo sapiens OX=9606 GN=REPS1 PE=1 SV=3	1.371	0.059	1.216	1.102	0.83	0.804	13.954	0.906	0.682	0.45	-4.07	0.28	0.14	-0.27	-0.31	3.8	-0.14	-0.55	0.970479	0.00066621	0.99995	0.992173	0.999996	0.774838	0.000791162	0.970887	0.999517	107.5	147.4	6.4	130.8	118.5	89.3	20.27	16.46	91.32	21.07	59.08	24.24	87.2	131.7	110.4	136.7	187.4	151.3	16.1
ALTHNGTPR	1xDeamidated [N5]; 1xPhospho [T7]	Q9HB90	Ras-related GTP-binding protein C OS=Homo sapiens OX=9606 GN=RRAGC PE=1 SV=1	0.814	0.06	0.919	0.774	0.062	0.951	1.035	0.843	0.067	-0.3	-4.07	-0.12	-0.37	-4.02	-0.07	0.05	-0.25	-3.9	0.949681	1.91748e-06	0.996331	0.924214	6.03318e-06	0.999999	0.877449	0.996	1.02463e-05	165.3	134.6	9.9	151.9	128	10.2	24.7	10.75	58.69	15.99	9.44	28.7	138.9	221.2	159.6	147.1	129.9	118.9	2.8
TGSGSPFAGNSPAREGEQDAASLKDVFK	2xPhospho [S5; S11]	Q9UPT8	Zinc finger CCCH domain-containing protein 4 OS=Homo sapiens OX=9606 GN=ZC3H4 PE=1 SV=3	0.105	0.06	0.162	0.043	0.132	0.406	2.208	0.263	0.813	-3.25	-4.07	-2.62	-4.55	-2.92	-1.3	1.14	-1.93	-0.3	0.541615	0.690778	0.931163	0.291619	0.521676	0.994906	0.999603	0.778369	0.955578	399.6	42	23.9	64.8	17.1	52.7	71.61	20.3	153.14	84.07	137.13	45	386.4	46.6	330.6	27.8	34.8	42	11.7
TRSYDNLTTACDNTVPLASR	1xPhospho [S/T/Y]; 1xCarbamidomethyl [C11]	Q13615	Myotubularin-related protein 3 OS=Homo sapiens OX=9606 GN=MTMR3 PE=1 SV=3	0.907	0.06	1.358	0.065	0.109	0.072	1.819	0.048	0.08	-0.14	-4.06	0.44	-3.93	-3.2	-3.79	0.86	-4.37	-3.64	1	0.757397	0.999999	0.757188	0.855604	0.787814	0.999938	0.805211	0.893071	171.5	155.5	10.3	232.9	11.2	18.7	72.72	62.86	162.2	80.38	156.89	21.99	26.9	225.7	171.2	162.4	155.2	32.1	1.3
ESEKQQDSQPEEVMDVLEMVENVK	1xPhospho [S8]; 1xDeamidated [Q9]	Q9H307	Pinin OS=Homo sapiens OX=9606 GN=PNN PE=1 SV=5	0.078	0.06	0.056	0.026	0.027	0.333	0.453	0.458	0.481	-3.69	-4.06	-4.15	-5.27	-5.2	-1.59	-1.14	-1.13	-1.06	0.153059	0.417744	0.0953042	0.0132095	0.144838	0.68344	0.970915	0.838174	0.999781	481.2	37.4	28.8	27.1	12.4	13.1	35.12	28.65	148.1	20.71	62.33	163.13	473.5	300.3	244.9	27.5	15.1	23.3	312.5
LKDLGHPVEEEDELESGDQEDEDDESEDPGKDLDHI	2xPhospho [S16; S26]; 1xDeamidated [Q19]	O60763	General vesicular transport factor p115 OS=Homo sapiens OX=9606 GN=USO1 PE=1 SV=2	0.175	0.06	1.021	0.981	0.686	5.601	11.395	0.96	0.672	-2.51	-4.05	0.03	-0.03	-0.54	2.49	3.51	-0.06	-0.57	0.305477	0.116908	0.98097	0.999956	0.922848	0.391292	0.454668	0.995643	0.99971	152.9	26.8	9.2	156.2	150	105	17.69	31.7	138.13	73.08	24.14	74.24	128.2	183.5	157.1	27.5	24.4	43.1	7
RGSSPDVHALLEITEESDAVLVDKSDSD	1xPhospho [S]	Q6NZI2	Caveolae-associated protein 1 OS=Homo sapiens OX=9606 GN=CAVIN1 PE=1 SV=1	0.931	0.06	0.959	0.003	0.046	0.004	0.762	0.003	0.048	-0.1	-4.05	-0.06	-8.23	-4.44	-8.13	-0.39	-8.17	-4.38	0.987969	0.599208	0.999994	0.147165	0.576659	0.355773	1	0.179054	0.649854	200	186.2	12.1	191.9	0.7	9.2	27.68	78.37	146.37	8.31	171.91	148.27	249.2	162.8	154.9	151.6	13.5	189.7	9.8
NISSSPSVESLPGGR	1xPhospho [S]	Q92609	TBC1 domain family member 5 OS=Homo sapiens OX=9606 GN=TBC1D5 PE=1 SV=1	0.739	0.061	0.991	0.831	0.061	1.124	0.996	0.839	0.061	-0.44	-4.04	-0.01	-0.27	-4.04	0.17	-0.01	-0.25	-4.03	0.989998	0.000309564	1	0.998545	0.000652265	0.999943	0.994792	0.998148	0.000632887	162.9	120.4	9.9	161.4	135.4	9.9	4.94	7.79	58.34	6.03	5.56	94.41	164.6	167.7	152.6	130.4	121.6	111.5	10
GNPGLHSPMLDLDNDTRPSVLGHLSQTASLKR	1xDeamidated [N14]; 1xPhospho [S29]	Q96KP1	Exocyst complex component 2 OS=Homo sapiens OX=9606 GN=EXOC2 PE=1 SV=1	0.053	0.061	0.051	0.386	0.313	7.265	5.137	7.561	6.122	-4.23	-4.04	-4.29	-1.37	-1.68	2.86	2.36	2.92	2.61	0.634559	0.669209	0.880424	0.999937	0.966309	0.518269	0.974863	0.788323	0.999566	321.9	17.1	19.6	16.4	124.3	100.7	87.14	21.69	11.96	114.69	16.34	79.69	363.4	484.4	6.9	18.3	26.8	19.3	20.2
SDSPVPTAPTSGGPKPSTASAVPELATDPELEK	1xPhospho [S]	Q86U44	N6-adenosine-methyltransferase catalytic subunit OS=Homo sapiens OX=9606 GN=METTL3 PE=1 SV=2	0.147	0.061	0.122	0.501	0.027	3.416	0.44	4.101	0.221	-2.77	-4.03	-3.03	-1	-5.21	1.77	-1.18	2.04	-2.18	0.988851	0.551228	0.669974	0.999562	0.436223	0.999582	0.999926	0.829343	0.997931	322.9	47.4	19.8	39.4	161.8	8.7	74.96	113.97	61.4	116.38	75.31	151.8	327.9	30.5	283.9	36.7	265	41.6	15.1
FKPHPSNMMSKLSSEDEEEDEAEDDQSEASGKK	2xPhospho [S]	Q8NEJ9	Neuroguidin OS=Homo sapiens OX=9606 GN=NGDN PE=1 SV=1	0.971	0.061	1.051	0.554	1.186	0.571	19.328	0.527	1.129	-0.04	-4.03	0.07	-0.85	0.25	-0.81	4.27	-0.92	0.18	0.964526	0.0141241	0.999869	0.985411	0.999818	0.999987	0.00924487	0.945348	1	124.4	120.8	7.6	130.7	68.9	147.6	46.79	69.86	65.94	40.26	22.9	52.3	167.7	58.1	144.6	141.3	140.3	19.4	7.7
GGQGDPAVPAQQPADPSTPERQSSPSGSEQLVR	2xPhospho [S17; S23]	O15231	Zinc finger protein 185 OS=Homo sapiens OX=9606 GN=ZNF185 PE=1 SV=3	0.129	0.061	0.257	0.178	0.126	1.381	2.048	0.694	0.49	-2.95	-4.03	-1.96	-2.49	-2.99	0.47	1.03	-0.53	-1.03	0.393721	0.298524	0.989391	0.902583	0.865288	0.914517	0.873037	0.99778	0.994169	342.6	44.2	21	88	61.1	43.1	82.75	71.43	100.14	129.45	116.76	123.42	215.8	393.3	36.9	46	27.9	7.3	7.4
LSSSEETESTQCCPGSPVAQTESPCDLSSIVEEENTDR	3xCarbamidomethyl [C12; C13; C25]; 1xDeamidated [Q]; 1xPhospho [S/T]	Q12802	A-kinase anchor protein 13 OS=Homo sapiens OX=9606 GN=AKAP13 PE=1 SV=2	0.137	0.062	0.617	0.608	0.106	4.432	1.722	0.985	0.172	-2.87	-4.02	-0.7	-0.72	-3.24	2.15	0.78	-0.02	-2.54	0.631007	0.255712	0.966315	0.862075	0.68666	0.99723	0.950523	0.999145	0.979118	237.1	32.5	14.6	146.4	144.2	25.1	36.76	116.85	153	75.78	86.87	121.65	304.8	182.9	156.9	25.1	11.4	129.9	150.2
SNSQSDSHDEEVSPTPPNPVVK	1xPhospho [S/T]	P31321	cAMP-dependent protein kinase type I-beta regulatory subunit OS=Homo sapiens OX=9606 GN=PRKAR1B PE=1 SV=4	0.69	0.062	1.169	0.183	1.074	0.266	17.355	0.157	0.919	-0.54	-4.01	0.22	-2.45	0.1	-1.91	4.12	-2.67	-0.12	0.864205	0.150052	0.999949	0.857685	0.999996	1	0.125243	0.764021	0.999999	143.6	99	8.9	167.9	26.3	154.3	11.73	80.3	150.37	8.38	94.73	4.38	113.2	139.5	140.1	6.5	117.8	96.2	8.6
EGSPIPHDPEFGSK	1xPhospho [S3]	P85037	Forkhead box protein K1 OS=Homo sapiens OX=9606 GN=FOXK1 PE=1 SV=1	0.756	0.062	1.135	0.943	0.207	1.246	3.339	0.831	0.182	-0.4	-4.01	0.18	-0.08	-2.27	0.32	1.74	-0.27	-2.46	0.983963	0.00285635	0.999993	0.999648	0.0592252	0.998925	0.489235	0.997872	0.0475632	146.2	110.6	9.1	166	137.9	30.2	22.88	4.83	123.32	4.14	15.82	53.25	126.7	193.2	140.4	111.4	106.2	101.2	2.4
LFSQGQDVSNK	1xPhospho [S3]	P55196	Afadin OS=Homo sapiens OX=9606 GN=AFDN PE=1 SV=3	0.655	0.062	0.775	0.796	0.807	1.215	13.021	1.027	1.042	-0.61	-4.01	-0.37	-0.33	-0.31	0.28	3.7	0.04	0.06	0.999699	0.109688	0.998167	0.892589	0.985089	0.968092	0.289076	0.985366	0.999871	146.5	96	9.1	113.5	116.6	118.2	113.48	48.01	121.93	47.28	71.59	51.25	493.3	122.1	31.5	80	73.8	165.1	7.6
VAASPKSPTAALNESLVECPK	1xPhospho [S]; 1xDeamidated [N13]; 1xCarbamidomethyl [C19]	Q53EZ4	Centrosomal protein of 55 kDa OS=Homo sapiens OX=9606 GN=CEP55 PE=1 SV=3	0.08	0.062	0.72	0.508	0.132	6.313	2.118	0.705	0.183	-3.64	-4.01	-0.47	-0.98	-2.92	2.66	1.08	-0.5	-2.45	0.861357	0.744917	0.998731	0.999998	0.862263	0.900919	0.999852	0.999725	0.971462	239.8	19.3	14.9	172.7	121.7	31.6	66.23	133.8	151.09	87.86	105.68	147.87	218.7	38.4	159.1	139.3	12.8	12.1	9.9
TGSVQTPPDLESSEEVDAAEGAPEVVGPK	1xPhospho [S/T]; 1xDeamidated [Q5]	P28290	Protein ITPRID2 OS=Homo sapiens OX=9606 GN=ITPRID2 PE=1 SV=3	0.09	0.062	0.173	0.526	0.037	5.832	0.595	3.033	0.214	-3.47	-4	-2.53	-0.93	-4.75	2.54	-0.75	1.6	-2.23	0.540429	0.26182	0.763929	0.993147	0.139138	0.834724	0.997833	0.963966	0.726222	317.7	28.6	19.8	55.1	167	11.8	31.07	131.89	130.36	85.52	5.45	142.17	260.3	240.1	137.2	19.4	21.7	217.2	15
AHTPTPGIYMGRPTHSGGGGGGGGGGGGGGGGR	1xPhospho [T3]	Q13595	Transformer-2 protein homolog alpha OS=Homo sapiens OX=9606 GN=TRA2A PE=1 SV=1	1.256	0.063	0.112	0.058	0.109	0.047	1.74	0.522	0.972	0.33	-4	-3.16	-4.1	-3.2	-4.43	0.8	-0.94	-0.04	1	0.875349	0.972293	0.596362	0.843838	0.60556	1	0.942419	0.997761	231	290	14.5	25.9	13.5	25.1	83.1	78.35	156.96	136.42	62.89	146.37	302.8	195.1	19.1	258.4	244.9	16.7	4.3
AEGLEEADTGASGCHSHPEEQPTSISPSR	1xCarbamidomethyl [C14]; 1xDeamidated [Q21]; 1xPhospho [S/T]	Q9BV36	Melanophilin OS=Homo sapiens OX=9606 GN=MLPH PE=1 SV=1	0.967	0.063	0.839	0.856	0.054	0.886	0.857	1.02	0.065	-0.05	-3.98	-0.25	-0.22	-4.2	-0.18	-0.22	0.03	-3.95	0.907505	0.587695	0.999971	0.990145	0.665463	0.997892	0.999992	0.998081	0.565514	158.7	153.5	10.1	133.2	135.9	8.6	87.07	10.86	67.4	76.18	48.98	119.08	184.5	256.6	5.1	187.8	178.5	151.7	5.8
RLSLPGLLSQVSPR	2xPhospho [S3; S9]	Q96Q42	Alsin OS=Homo sapiens OX=9606 GN=ALS2 PE=1 SV=2	0.678	0.064	0.775	0.021	0.635	0.031	9.911	0.027	0.819	-0.56	-3.96	-0.37	-5.59	-0.65	-5.03	3.31	-5.22	-0.29	0.99926	0.307917	0.994652	0.133027	0.719398	0.222365	0.966008	0.28532	0.938887	189	128.3	12.1	146.6	3.9	120.1	37.12	10.86	12.1	64.55	165.61	83.9	292.4	145	182.2	118.3	123.6	144.8	10.8
AQQNTDKDAAAHLQTSHKPSAEDAEGQSPLSQK	1xDeamidated [N/Q]; 1xPhospho [S28]	Q96F24	Nuclear receptor-binding factor 2 OS=Homo sapiens OX=9606 GN=NRBF2 PE=1 SV=1	0.704	0.064	1.014	1.126	1.844	1.6	28.625	1.11	1.818	-0.51	-3.96	0.02	0.17	0.88	0.68	4.84	0.15	0.86	0.930067	0.843198	0.886528	0.920696	0.402135	1	0.0702106	0.999998	0.932989	104.3	73.4	6.7	105.8	117.4	192.3	84.77	77.69	104.06	67.99	58.22	31.27	104.6	2.4	123.6	177	34.2	73.6	6.7
SPQGQLDTSESKPDSFFLEPLMPAVLKPAK	1xPhospho [S1]; 1xDeamidated [Q5]	Q5T5Y3	Calmodulin-regulated spectrin-associated protein 1 OS=Homo sapiens OX=9606 GN=CAMSAP1 PE=1 SV=2	0.165	0.065	0.139	0.136	1.125	0.82	17.225	0.976	8.098	-2.6	-3.94	-2.85	-2.88	0.17	-0.29	4.11	-0.04	3.02	0.690049	0.663788	0.787987	0.960063	0.999994	0.983733	0.734364	0.996268	0.847864	228.2	37.7	14.9	31.7	30.9	256.6	81.07	145.52	156.78	72.02	129.88	66.48	344.2	45	167.5	27.7	231.5	0.9	192.5
EEASLLSHSPGTSNQSQPCSPKPIR	2xPhospho [S20; S/T]; 1xCarbamidomethyl [C19]	Q9H4Z3	mRNA (2'-O-methyladenosine-N(6)-)-methyltransferase OS=Homo sapiens OX=9606 GN=PCIF1 PE=1 SV=1	1.124	0.066	0.202	0.358	0.126	0.318	1.929	1.775	0.627	0.17	-3.93	-2.31	-1.48	-2.98	-1.65	0.95	0.83	-0.67	0.999668	0.0798496	0.566379	0.348456	0.182454	0.492594	0.994212	0.997943	0.945857	208.7	234.6	13.7	42	74.6	26.4	53.54	66.44	113.69	39.2	71.12	24.02	313.8	89.2	235.8	288.6	47.2	265.1	78.9
YKDNPFSLGESFGSR	1xPhospho [S11]	Q8N6H7	ADP-ribosylation factor GTPase-activating protein 2 OS=Homo sapiens OX=9606 GN=ARFGAP2 PE=1 SV=1	0.571	0.066	0.967	0.288	0.053	0.505	0.811	0.298	0.055	-0.81	-3.93	-0.05	-1.79	-4.23	-0.99	-0.3	-1.74	-4.18	0.969908	0.0194862	1	0.592534	0.00240495	0.944449	0.796457	0.56923	0.00225416	203.7	116.4	13.4	196.9	58.8	10.9	35.26	66.56	75.04	21.56	60.29	88.52	121.3	254.4	190.5	54.1	108.8	221.4	30
HLDVDLDRQSLSSIDKNPSER	2xPhospho [S12; S]	Q9Y6D5	Brefeldin A-inhibited guanine nucleotide-exchange protein 2 OS=Homo sapiens OX=9606 GN=ARFGEF2 PE=1 SV=3	1.49	0.066	1.056	0.247	0.589	0.166	8.956	0.234	0.558	0.58	-3.93	0.08	-2.02	-0.76	-2.59	3.16	-2.1	-0.84	0.9999	0.807434	0.817237	0.90125	0.914474	0.806381	0.999788	0.99994	0.999857	134.9	201	8.9	142.5	33.3	79.5	28.35	5.11	149.52	86.16	124.46	86.01	179.7	128.6	103.4	192	175.3	191.6	8.5
KNSTGSGHSAQELPTIR	1xPhospho [S/T]	O94763	Unconventional prefoldin RPB5 interactor 1 OS=Homo sapiens OX=9606 GN=URI1 PE=1 SV=3	0.035	0.066	0.063	0.076	0.02	2.179	0.309	1.203	0.322	-4.84	-3.92	-3.98	-3.72	-5.62	1.12	-1.69	0.27	-1.63	0.5845	0.405517	0.233426	0.40072	0.137111	0.999239	0.969142	0.998312	0.999098	476	16.6	31.4	30.1	36.2	9.7	6.34	152.11	32.57	154.64	40.2	108.61	318.2	352.4	358.5	269.1	12.3	11.5	23.2
LLEDSDSEDEAAPSPLQPALRPNPTAILDEAPKPK	2xPhospho [S5; S7]; 2xDeamidated [Q17; N23]	Q9BW85	Splicing factor YJU2 OS=Homo sapiens OX=9606 GN=YJU2 PE=1 SV=1	0.225	0.066	1.58	0.164	0.063	0.728	0.947	0.104	0.04	-2.15	-3.92	0.66	-2.61	-4	-0.46	-0.08	-3.27	-4.66	0.999489	0.995824	0.971078	0.998872	0.925663	0.98091	0.996656	0.865094	0.557362	193.7	43.6	12.8	306.1	31.7	12.1	88.29	116.02	155.69	72.68	145.07	22.78	2.1	226.6	165.7	250.6	33.5	37.3	4.2
QPTAEGSGSDAHSVESLTAQNLSLHSGTATPPLTSR	1xPhospho [T]	Q9UDT6	CAP-Gly domain-containing linker protein 2 OS=Homo sapiens OX=9606 GN=CLIP2 PE=1 SV=1	0.166	0.066	0.167	1.165	0.112	7.002	1.69	6.972	0.67	-2.59	-3.91	-2.58	0.22	-3.16	2.81	0.76	2.8	-0.58	0.667927	0.506721	0.86612	0.994694	0.503687	0.91134	1	0.988689	0.981127	224.1	37.3	14.9	37.5	261.2	25.1	42.75	108.44	146.13	114.51	75.8	121.73	258.9	104.4	179	29.8	128.7	13.7	10.1
SSSLDALDADSEGEGHSEPSHICYTPGSQSSSR	1xPhospho [S]; 1xCarbamidomethyl [C23]	Q8N1W1	Rho guanine nucleotide exchange factor 28 OS=Homo sapiens OX=9606 GN=ARHGEF28 PE=1 SV=3	0.05	0.067	0.117	1.794	0.624	35.974	9.368	15.367	5.345	-4.33	-3.91	-3.1	0.84	-0.68	5.17	3.23	3.94	2.42	0.375999	0.202389	0.708463	0.994721	0.995748	0.183854	0.395694	0.423697	0.926404	164.3	8.2	10.9	19.2	294.8	102.5	39.85	158.41	137.35	136.23	21.22	19.47	123.6	202.6	94.6	174.4	6.2	4.4	2.3
EAPSPLMIHSPQMSQFQSLTHQSPPQQNVQPK	3xPhospho [S4; S10; S14]; 1xDeamidated [Q]	O60885	Bromodomain-containing protein 4 OS=Homo sapiens OX=9606 GN=BRD4 PE=1 SV=2	0.064	0.067	0.139	0.028	0.059	0.434	0.889	0.199	0.428	-3.97	-3.91	-2.85	-5.18	-4.08	-1.2	-0.17	-2.33	-1.23	0.652699	0.574165	0.891362	0.303775	0.628211	0.98202	0.999999	0.850561	0.994077	442.5	28.2	29.5	61.4	12.2	26.2	81.08	158.71	55.17	128.88	128.44	28.59	35.6	339.6	503.6	388.4	1.6	21.7	34.5
KITPPSSPHSLTSTLVSLGHEEALEMAGSK	1xPhospho [T3]	Q9BY89	Uncharacterized protein KIAA1671 OS=Homo sapiens OX=9606 GN=KIAA1671 PE=1 SV=2	1.282	0.067	0.08	0.908	0.096	0.708	1.436	11.304	1.192	0.36	-3.91	-3.64	-0.14	-3.38	-0.5	0.52	3.5	0.25	1	0.265907	0.27601	0.920585	0.102868	0.928936	0.987038	0.776236	0.984411	174.8	224.1	11.7	14	158.7	16.7	13.89	38.11	138.72	137.97	76.75	19.02	205.4	163.9	161.7	210.1	233.7	103.3	10.9
GYSISAGSDADTENEAVMSPEHAMR	1xPhospho [S/T]	Q9P273	Teneurin-3 OS=Homo sapiens OX=9606 GN=TENM3 PE=1 SV=3	0.969	0.067	0.124	0.044	0.217	0.045	3.255	0.354	1.751	-0.04	-3.9	-3.01	-4.51	-2.2	-4.46	1.7	-1.5	0.81	1	0.545569	0.677976	0.421765	0.861562	0.391051	0.989609	0.996744	0.998968	247.7	240.2	16.6	30.8	10.9	53.9	69.19	66.1	158.39	60.2	94.4	46.62	260.3	274.4	38.7	252.4	283.3	47.1	17.4
SSPAELSSSSQHLLR	1xPhospho [S]	Q9UQC2	GRB2-associated-binding protein 2 OS=Homo sapiens OX=9606 GN=GAB2 PE=1 SV=1	0.921	0.067	1.072	0.971	1.061	1.054	15.881	0.905	0.99	-0.12	-3.9	0.1	-0.04	0.09	0.08	3.99	-0.14	-0.01	0.999893	0.00307552	1	1	1	0.999975	0.00300144	0.999999	1	117.8	108.6	7.9	126.3	114.4	125	3.6	7.13	124.82	8.41	3.13	11.48	121.9	116.3	113.6	113.9	98.7	107.1	7.8
GVGSGPHPPDTQQPSPSK	1xPhospho [S15]	Q68CZ2	Tensin-3 OS=Homo sapiens OX=9606 GN=TNS3 PE=1 SV=2	0.097	0.067	0.088	0.096	1.337	0.989	19.981	1.092	15.182	-3.36	-3.9	-3.51	-3.38	0.42	-0.02	4.32	0.13	3.92	0.996352	0.997713	0.971928	0.996001	0.908159	1	0.71006	0.999777	0.529226	223.4	21.7	15	19.7	21.5	298.7	84.8	145.39	158.7	152.12	142.85	30.25	5.3	133.1	176.9	12.9	172.8	7.8	8.2
VLSTSTDLEAAVADALK	1xPhospho [S/T]	Q7Z460	CLIP-associating protein 1 OS=Homo sapiens OX=9606 GN=CLASP1 PE=1 SV=1	0.088	0.067	0.127	0.086	0.103	0.979	1.527	0.676	0.809	-3.51	-3.9	-2.98	-3.55	-3.29	-0.03	0.61	-0.57	-0.31	0.00140568	0.00128203	0.00527105	0.00240892	0.000684114	0.999206	0.998061	0.995896	0.781318	408.3	35.7	27.4	51.8	35	41.9	37.79	26.78	52.35	62.86	18.74	66.57	599.7	376.9	290.3	36.5	21.1	33	18.6
GRSFAGNLNTYKR	1xPhospho [S3]	Q01813	ATP-dependent 6-phosphofructokinase, platelet type OS=Homo sapiens OX=9606 GN=PFKP PE=1 SV=2	0.135	0.067	0.139	0.726	0.03	5.393	0.447	5.241	0.217	-2.89	-3.89	-2.85	-0.46	-5.05	2.43	-1.16	2.39	-2.2	0.996592	0.984038	0.990405	0.999276	0.767512	0.962041	0.98199	0.934425	0.972337	286.1	38.5	19.3	39.7	207.8	8.6	78.62	116.26	151.99	126.79	38.78	168.41	192.1	12.4	197.6	15.8	25.9	147.4	8.4
DLQSEFGITGDPQPSSFSPSSWCQGASQDYGLGGASPR	1xCarbamidomethyl [C23]; 1xPhospho [S36]	Q9C0C2	182 kDa tankyrase-1-binding protein OS=Homo sapiens OX=9606 GN=TNKS1BP1 PE=1 SV=4	0.032	0.067	0.09	0.083	1.404	2.621	20.821	0.922	15.646	-4.99	-3.89	-3.48	-3.6	0.49	1.39	4.38	-0.12	3.97	0.261702	0.759003	0.645998	0.842888	0.93027	0.855305	0.998162	0.998778	0.9881	224.3	7.1	15.1	20.1	18.6	314.9	31.93	100.1	148.78	137.59	130.61	86.19	264	203.8	135.6	20.7	2.1	6.4	200.9
SLSNSNPDISGTPTSPDDEVR	1xPhospho [S]	Q96N67	Dedicator of cytokinesis protein 7 OS=Homo sapiens OX=9606 GN=DOCK7 PE=1 SV=4	0.86	0.067	0.896	0.71	0.696	0.826	10.322	0.793	0.777	-0.22	-3.89	-0.16	-0.49	-0.52	-0.28	3.37	-0.33	-0.36	0.996828	0.00318998	0.999889	0.970704	0.986383	0.999617	0.00897283	0.994089	0.998298	141.8	122	9.6	127.1	100.8	98.7	8.61	11.86	127.58	7.78	6.85	14.04	136.2	130.3	153.5	122.1	97	117.1	9.2
SISNPPGSNLR	1xPhospho [S3]	Q9H4A3	Serine/threonine-protein kinase WNK1 OS=Homo sapiens OX=9606 GN=WNK1 PE=1 SV=2	0.808	0.068	1.309	1.165	0.283	1.442	4.186	0.89	0.216	-0.31	-3.89	0.39	0.22	-1.82	0.53	2.07	-0.17	-2.21	0.999982	0.0357445	0.80797	0.929476	0.44083	0.874863	0.585808	0.999517	0.0702845	129.5	104.6	8.8	169.6	150.9	36.7	67.31	58.62	92.64	26.17	17	45.93	30.7	183.8	133.4	149.5	36.1	107.7	36.4
ASVVDPSTESSPAPQEGSEQPASPASPLSSR	1xPhospho [S]	Q66K14	TBC1 domain family member 9B OS=Homo sapiens OX=9606 GN=TBC1D9B PE=1 SV=3	0.096	0.068	0.733	0.059	0.089	0.619	1.306	0.081	0.122	-3.39	-3.87	-0.45	-4.08	-3.49	-0.69	0.39	-3.63	-3.04	0.995936	0.98703	0.974649	0.727497	0.926768	0.934907	0.99941	0.33689	0.572601	293.4	28	20	215	17.4	26.2	91.18	132.39	137.82	18.89	48.12	135.96	372.8	236.1	4.2	22.6	194.4	13.8	180.3
SLSNSNPDISGTPTSPDDEVR	2xPhospho [S/T]	Q96N67	Dedicator of cytokinesis protein 7 OS=Homo sapiens OX=9606 GN=DOCK7 PE=1 SV=4	0.906	0.068	1.023	0.678	0.913	0.748	13.353	0.663	0.893	-0.14	-3.87	0.03	-0.56	-0.13	-0.42	3.74	-0.59	-0.16	0.999989	0.0388306	0.999815	0.994317	0.999799	0.998766	0.059811	0.999769	1	130.8	118.5	8.9	133.7	88.7	119.4	11.21	8.55	147.83	28.24	14.56	15.08	114.2	142.9	127.6	115.6	127.6	107.8	8.7
KGWMSILDEPGEPPSPSLTTTSTSQWK	1xPhospho [S15]; 1xDeamidated [Q25]	Q9H2D6	TRIO and F-actin-binding protein OS=Homo sapiens OX=9606 GN=TRIOBP PE=1 SV=3	1.043	0.068	0.92	1.318	1.25	1.264	18.284	1.433	1.359	0.06	-3.87	-0.12	0.4	0.32	0.34	4.19	0.52	0.44	0.996625	0.978935	0.983937	0.990868	0.999641	0.999997	0.998207	0.814895	0.998938	107.1	111.8	7.3	98.6	141.2	133.9	79.28	17.03	158.95	92.31	11	91.07	111.7	123.9	7.2	96.7	136.4	116.5	1.4
KLDPAQSASRENLLEEQGSIALR	1xPhospho [S]	Q13813	Spectrin alpha chain, non-erythrocytic 1 OS=Homo sapiens OX=9606 GN=SPTAN1 PE=1 SV=3	0.084	0.069	0.086	0.03	0.043	0.352	0.631	0.343	0.502	-3.57	-3.87	-3.54	-5.08	-4.53	-1.51	-0.66	-1.55	-0.99	0.170353	0.612516	0.149017	0.0384592	0.0492334	0.935438	0.518656	0.95653	0.980889	457.4	38.4	31.4	39.5	13.5	19.8	0.23	42.02	164.87	35.23	119.23	47.21	244.6	243.9	245	20.5	31.8	13.5	16.8
RPSPPEPWDEEDGASCSTFFGSEER	1xPhospho [S3]; 1xCarbamidomethyl [C16]	Q9P1Y6	PHD and RING finger domain-containing protein 1 OS=Homo sapiens OX=9606 GN=PHRF1 PE=1 SV=3	0.374	0.069	0.913	0.417	0.395	1.115	5.751	0.457	0.433	-1.42	-3.86	-0.13	-1.26	-1.34	0.16	2.52	-1.13	-1.21	0.279	0.000744773	0.999818	0.179985	0.243604	0.999575	0.0344339	0.260883	0.34485	189.4	70.9	13	172.8	79	74.8	18.63	24.61	79.7	4.12	76.56	9.84	229	182.9	159.2	92.1	57.1	68.5	12.6
RHTLSEVTNQLVVMPGAGK	1xPhospho [S/T]	Q9H0K1	Serine/threonine-protein kinase SIK2 OS=Homo sapiens OX=9606 GN=SIK2 PE=1 SV=1	0.872	0.069	0.099	0.288	0.159	0.33	2.308	2.916	1.609	-0.2	-3.86	-3.34	-1.8	-2.65	-1.6	1.21	1.54	0.69	0.995241	0.614413	0.718259	0.805562	0.774789	0.971096	0.999653	0.999977	0.999998	241.3	210.4	16.6	23.8	69.5	38.4	25.76	66.19	140.21	135.72	115.79	145.13	212	167.4	125.3	145.9	183.4	30.9	156.8
VKASPITNDGEDEFVPSDGLDKDEYTFSPGK	3xPhospho [S4; S17; S28]	Q02880	DNA topoisomerase 2-beta OS=Homo sapiens OX=9606 GN=TOP2B PE=1 SV=3	0.086	0.069	0.368	0.647	1.15	7.499	16.685	1.756	3.121	-3.54	-3.86	-1.44	-0.63	0.2	2.91	4.06	0.81	1.64	0.406376	0.643769	0.913995	0.965456	0.999684	0.8308	0.483683	0.999937	0.79586	180.7	15.6	12.5	66.6	116.9	207.8	49.73	118.88	141.34	108.18	77.31	41.36	191.6	183.9	62.2	68.5	3.1	15.9	7.6
ASTDNEELLQFPLELCSDSLPSHPFPPAK	1xPhospho [S/T]; 1xCarbamidomethyl [C16]	Q86YS7	C2 domain-containing protein 5 OS=Homo sapiens OX=9606 GN=C2CD5 PE=1 SV=1	0.233	0.069	0.034	0.029	0.019	0.124	0.283	0.839	0.567	-2.1	-3.86	-4.86	-5.12	-5.68	-3.01	-1.82	-0.25	-0.82	0.996994	0.862206	0.75286	0.493387	0.3221	0.748521	0.897274	0.996732	0.960646	433.3	100.9	29.9	14.9	12.5	8.4	93.08	57.78	21.39	129.48	72.46	56.19	749.2	4.7	454.6	105.9	28.4	117.7	42.2
NTFTAWSDEESDYEIDDRDVNK	1xPhospho [S/T/Y]	Q6PKG0	La-related protein 1 OS=Homo sapiens OX=9606 GN=LARP1 PE=1 SV=2	0.09	0.069	0.658	0.048	0.015	0.529	0.219	0.072	0.023	-3.47	-3.85	-0.6	-4.39	-6.05	-0.92	-2.19	-3.79	-5.44	0.836297	0.89405	0.996148	0.866796	0.330606	1	0.873883	0.985728	0.577602	319	28.8	22.1	210.1	15.2	4.8	80.44	40.15	146.51	83.4	138.45	135.03	369	18.2	328.9	29.7	41.4	17.6	6.5
NPYLLSEEEDDDVDGDVNVEKNETEPPKGK	1xPhospho [S6]	O60524	Ribosome quality control complex subunit NEMF OS=Homo sapiens OX=9606 GN=NEMF PE=1 SV=4	0.072	0.069	0.842	0.07	0.045	0.978	0.642	0.083	0.053	-3.8	-3.85	-0.25	-3.83	-4.49	-0.03	-0.64	-3.58	-4.24	0.985642	0.996583	1	0.993274	0.834855	0.999998	0.975334	0.991678	0.822893	285.9	20.6	19.8	240.8	20.1	12.7	88.6	123.47	149.32	80.34	136.88	161.87	311	6.6	206	116.9	14.8	12.9	12.9
RSSTSGDTEEEEEEEVVPFSSDEQK	1xPhospho [S/T]; 1xDeamidated [Q24]	O15231	Zinc finger protein 185 OS=Homo sapiens OX=9606 GN=ZNF185 PE=1 SV=3	0.243	0.07	1.327	0.286	0.23	1.176	3.303	0.215	0.174	-2.04	-3.84	0.41	-1.81	-2.12	0.23	1.72	-2.22	-2.53	0.936894	0.227099	0.999977	0.972884	0.990329	0.999974	0.486126	0.938178	0.971208	190.1	46.2	13.3	252.3	54.3	43.8	63.6	130.41	57.89	67.11	83.15	103.01	38	202.2	175	11.9	42.5	269.8	9.4
TQSEESRPQSLQQPATSTTETPASPAHTTPQTQSTSGR	1xDeamidated [Q13]; 1xPhospho [S24]	P15336	Cyclic AMP-dependent transcription factor ATF-2 OS=Homo sapiens OX=9606 GN=ATF2 PE=1 SV=4	0.081	0.07	1.303	0.068	0.072	0.841	1.026	0.052	0.055	-3.63	-3.84	0.38	-3.88	-3.8	-0.25	0.04	-4.26	-4.18	0.245044	0.58018	0.910957	0.173974	0.135661	0.999882	0.876336	0.617835	0.526295	231.3	18.7	16.2	301.4	15.8	16.6	22.38	32.93	143.38	85.55	50.55	53.45	170.8	266.7	250.2	20.3	24.6	12.2	17.5
GNPGLHSPMLDLDNDTRPSVLGHLSQTASLKR	2xDeamidated [N14; Q26]; 1xPhospho [S29]	Q96KP1	Exocyst complex component 2 OS=Homo sapiens OX=9606 GN=EXOC2 PE=1 SV=1	1.765	0.071	0.109	0.079	0.186	0.045	2.62	0.731	1.71	0.82	-3.82	-3.2	-3.66	-2.43	-4.47	1.39	-0.45	0.77	0.76337	0.976469	0.945169	0.338649	0.992235	0.0426897	0.999982	0.807642	0.999414	187	329.9	13.2	20.3	14.8	34.7	85.76	11.3	157.8	49.17	85.34	27.06	169.4	227	5.5	279.9	347.6	298.9	4.8
NGFPHPEPDCNPSEAASEESNSEIEQEIPVEQK	3xDeamidated [N1; N11; N21]; 1xCarbamidomethyl [C10]; 1xPhospho [S]	Q9NR30	Nucleolar RNA helicase 2 OS=Homo sapiens OX=9606 GN=DDX21 PE=1 SV=5	0.143	0.071	1.34	1.726	0.237	12.032	3.341	1.288	0.177	-2.8	-3.82	0.42	0.79	-2.08	3.59	1.74	0.37	-2.5	0.837709	0.225803	0.990693	0.976457	0.999759	0.449023	0.328188	0.999992	0.952462	132.8	19.1	9.4	178	229.2	31.5	89.92	46.5	97.61	73.52	69.44	118.55	239.6	131.7	10.7	35.8	15.5	18.9	9.4
AGEPNSPDAEEANSPDVTAGCDPAGVHPPR	1xPhospho [S/T]; 1xDeamidated [N]; 1xCarbamidomethyl [C21]	Q08J23	RNA cytosine C(5)-methyltransferase NSUN2 OS=Homo sapiens OX=9606 GN=NSUN2 PE=1 SV=2	0.176	0.071	0.33	1.099	0.118	6.232	1.668	3.333	0.359	-2.5	-3.82	-1.6	0.14	-3.08	2.64	0.74	1.74	-1.48	0.56657	0.358415	0.753794	0.987982	0.538651	0.267689	0.999151	0.41434	0.998668	214.7	37.9	15.3	70.8	236	25.4	81.13	51.2	105.64	72.86	49.4	69.52	246.6	350.6	22.6	14	45.3	43.5	71.5
TKSEAESASPEETPDGSASPVEMQDEGAEEPHEAGEQLPPFLLK	1xPhospho [S]	Q9C0C9	(E3-independent) E2 ubiquitin-conjugating enzyme OS=Homo sapiens OX=9606 GN=UBE2O PE=1 SV=3	1.23	0.071	1.163	1.395	1.273	1.134	17.858	1.2	1.094	0.3	-3.81	0.22	0.48	0.35	0.18	4.16	0.26	0.13	0.9459	0.222679	1	0.997287	0.99999	0.771448	0.180824	0.995898	0.999965	97.9	120.4	7	113.8	136.5	124.5	38.6	83.61	143.85	9.62	71.96	14.47	150.5	79.5	82.3	101.3	8	150.8	5.9
GSFSGRLSPAYSLGSLTGASPCQSPCVQR	3xPhospho [Y11; T17; S24]; 2xCarbamidomethyl [C22; C26]; 1xDeamidated [Q23]	Q86UU1	Pleckstrin homology-like domain family B member 1 OS=Homo sapiens OX=9606 GN=PHLDB1 PE=1 SV=1	0.208	0.072	0.074	0.181	0.082	0.866	1.133	2.428	1.096	-2.26	-3.8	-3.75	-2.47	-3.62	-0.21	0.18	1.28	0.13	0.705562	0.205577	0.0382378	0.225162	0.0188184	0.917003	0.692335	0.870691	0.997889	371.1	77.3	26.7	27.6	67	30.3	10.28	121.47	141.74	46.39	9.83	56	255.7	288	235.1	39.6	372.8	53.3	17.6
QFCQEGQPHVLEALSPPQTSGLSPSR	1xCarbamidomethyl [C3]; 2xPhospho [S15; S20]	Q9H063	Repressor of RNA polymerase III transcription MAF1 homolog OS=Homo sapiens OX=9606 GN=MAF1 PE=1 SV=2	0.537	0.072	0.727	0.653	0.059	1.216	0.816	0.897	0.081	-0.9	-3.79	-0.46	-0.62	-4.09	0.28	-0.29	-0.16	-3.63	0.943076	0.0116917	0.99762	0.990025	0.00245693	0.999594	0.92495	0.999983	0.00493041	196.9	105.7	14.2	143.2	128.5	11.6	25.77	21.28	114.46	9.06	8.04	69.86	235.9	196.8	138.5	130.8	105.6	85.2	2.6
LPPTFFCGVCSDTDEDNGNGEDFQSELQK	2xCarbamidomethyl [C7; C10]; 1xPhospho [S/T]; 2xDeamidated [N17; N19]	P49792	E3 SUMO-protein ligase RanBP2 OS=Homo sapiens OX=9606 GN=RANBP2 PE=1 SV=2	0.103	0.072	0.102	0.801	0.088	7.753	1.22	7.863	0.865	-3.27	-3.79	-3.29	-0.32	-3.5	2.95	0.29	2.97	-0.21	0.987746	0.98237	0.876745	0.986522	0.576756	0.808355	0.910585	0.546457	0.990924	276.9	28.6	20	28.2	221.9	24.4	80.06	134.52	139.48	145.79	5.27	71.03	232.7	226.8	11.9	208.2	13.1	23.4	15.2
HEDEQALLDQNSQTPPPSPFSVQAFNK	1xPhospho [S/T]	O75592	E3 ubiquitin-protein ligase MYCBP2 OS=Homo sapiens OX=9606 GN=MYCBP2 PE=1 SV=4	0.518	0.072	0.41	0.853	0.678	1.648	9.378	2.08	1.652	-0.95	-3.79	-1.29	-0.23	-0.56	0.72	3.23	1.06	0.72	0.757867	0.0269045	0.55684	0.83364	0.974617	0.999985	0.0905655	0.99479	0.918393	169.9	88	12.3	69.7	145	115.2	123.16	61.27	62.95	85	69.83	6.45	705.7	43.5	128.5	103.4	24.2	66.5	16.4
SKSPEKVSSFSNSSSNK	1xPhospho [S3]	Q5VUA4	Zinc finger protein 318 OS=Homo sapiens OX=9606 GN=ZNF318 PE=1 SV=2	0.253	0.073	0.62	0.29	0.809	1.148	11.14	0.468	1.305	-1.99	-3.78	-0.69	-1.79	-0.31	0.2	3.48	-1.1	0.38	0.766456	0.0932793	0.999497	0.945993	0.996894	0.996989	0.190835	0.991808	0.999989	197.1	49.8	14.3	122.2	57.2	159.4	62.73	58.17	123.34	25.53	82.52	56.94	182.2	55.7	264	39.9	46	107.8	84
QEPIESDEEEAEPPREVEPGQR	1xPhospho [S6]	P56524	Histone deacetylase 4 OS=Homo sapiens OX=9606 GN=HDAC4 PE=1 SV=3	0.909	0.073	0.877	0.873	0.818	0.96	11.263	0.995	0.932	-0.14	-3.78	-0.19	-0.2	-0.29	-0.06	3.49	-0.01	-0.1	0.999964	0.0803101	0.999917	0.99991	0.772064	1	0.523304	1	0.872362	131.9	119.9	9.6	115.7	115.1	107.8	8.2	8.87	138.51	5.21	2.58	69.83	121.1	142.7	132.3	120.3	126.8	106.4	9.6
AGEPDGESLDEQPSSSSSKR	1xPhospho [S8]	Q9H3Q1	Cdc42 effector protein 4 OS=Homo sapiens OX=9606 GN=CDC42EP4 PE=1 SV=1	0.728	0.073	0.512	0.501	0.679	0.688	9.319	0.978	1.327	-0.46	-3.78	-0.97	-1	-0.56	-0.54	3.22	-0.03	0.41	0.999745	0.0969255	0.974815	0.928563	0.932447	0.982388	0.379324	0.999922	0.999943	171.8	125	12.5	87.9	86	116.7	33.58	12.98	143.12	35.12	17.97	55.64	175.2	93.5	187.2	105.4	136.4	127.5	12.8
IETIAASSTPTPIR	1xPhospho [S/T]	Q96P47	Arf-GAP with GTPase, ANK repeat and PH domain-containing protein 3 OS=Homo sapiens OX=9606 GN=AGAP3 PE=1 SV=2	1.248	0.073	0.039	0.996	0.158	0.798	2.168	25.436	4.04	0.32	-3.78	-4.67	-0.01	-2.66	-0.32	1.12	4.67	2.01	0.998092	0.436774	0.568444	0.736728	0.64385	0.918747	0.998824	0.999601	0.999993	170.7	213	12.5	6.7	170.1	27	16.26	74.92	55.07	151.5	86.4	38.22	165.6	228.9	192.4	240.1	249.6	23.2	14
KAKSPAPGLASGDRPPSVSSVHSEGDCNR	1xPhospho [S4]; 1xCarbamidomethyl [C27]; 1xDeamidated [N28]	Q9Y618	Nuclear receptor corepressor 2 OS=Homo sapiens OX=9606 GN=NCOR2 PE=1 SV=3	1.221	0.073	0.997	0.129	0.181	0.106	2.479	0.13	0.182	0.29	-3.77	0	-2.95	-2.46	-3.24	1.31	-2.95	-2.46	0.999998	0.837568	1	0.935913	0.939902	0.906229	0.99968	0.945707	0.949297	166.6	203.4	12.2	166.1	21.5	30.2	75.3	69.81	146.02	82.24	110.2	127.39	24.8	150.2	221	183.4	28.7	212.7	11
TGSGSPFAGNSPAREGEQDAASLK	1xDeamidated [N10]; 1xPhospho [S11]	Q9UPT8	Zinc finger CCCH domain-containing protein 4 OS=Homo sapiens OX=9606 GN=ZC3H4 PE=1 SV=3	1.431	0.073	1.653	0.16	0.045	0.112	0.613	0.097	0.027	0.52	-3.77	0.73	-2.65	-4.47	-3.16	-0.71	-3.37	-5.2	0.997074	0.792924	0.999998	0.973345	0.796397	0.99967	1	0.954412	0.743461	137.5	196.8	10.1	227.4	22	6.2	86.17	85.63	151.21	72.66	112.68	157.92	270.4	23	137.6	2.7	227	196.9	10.1
DFLSNEASLGAIGTSLPSR	1xPhospho [S/T]	Q9P2G1	Ankyrin repeat and IBR domain-containing protein 1 OS=Homo sapiens OX=9606 GN=ANKIB1 PE=1 SV=3	0.133	0.074	1.005	0.453	0.05	3.393	0.682	0.451	0.05	-2.91	-3.77	0.01	-1.14	-4.32	1.76	-0.55	-1.15	-4.33	0.612736	0.167639	0.876044	0.94399	0.091566	0.975652	0.998658	0.409341	0.0147217	221	29.5	16.3	222.1	100.1	11.1	79.57	59.81	28.15	12.99	71.43	84.9	234.3	308.7	20.7	31.3	21.8	67.2	12.9
EEPGLPPQPQPPPPPLPQPGDKSSWGR	1xPhospho [S]	Q9Y4H2	Insulin receptor substrate 2 OS=Homo sapiens OX=9606 GN=IRS2 PE=1 SV=2	1.521	0.074	1.274	1.146	0.278	0.754	3.772	0.9	0.218	0.6	-3.76	0.35	0.2	-1.85	-0.41	1.92	-0.15	-2.19	0.988908	0.197271	0.997863	0.999276	0.379569	0.999767	0.996362	0.999999	0.212619	113.4	172.4	8.4	144.4	129.9	31.5	54.24	19.93	140.25	9.28	3.95	89.97	108.8	174.1	52.8	116.9	172.3	165.5	7.7
DGLHFLPHASSSAQSPCGSPGMK	1xCarbamidomethyl [C17]; 1xPhospho [S]	Q3V6T2	Girdin OS=Homo sapiens OX=9606 GN=CCDC88A PE=1 SV=2	0.328	0.074	0.094	0.087	0.155	0.264	2.089	0.92	1.64	-1.61	-3.76	-3.41	-3.53	-2.69	-1.92	1.06	-0.12	0.71	0.879379	0.633831	0.216431	0.224377	0.515667	0.761807	0.999931	1	0.982158	345.3	113.3	25.6	32.6	29.9	53.4	63.77	63.12	101.13	100.2	78.86	76.47	441	406.8	82.6	134.5	26.6	133.5	30.1
SASTDLGTADVVLGR	1xPhospho [S3]	Q9Y2K5	R3H domain-containing protein 2 OS=Homo sapiens OX=9606 GN=R3HDM2 PE=1 SV=3	1.02	0.074	0.104	0.966	0.74	0.947	9.981	9.312	7.132	0.03	-3.75	-3.27	-0.05	-0.43	-0.08	3.32	3.22	2.83	0.775833	0.593122	0.849497	0.999762	0.994233	0.89493	0.323468	0.715107	0.570548	153.7	156.8	11.4	15.9	148.5	113.7	80.42	34.28	44.98	55.8	87.32	59.73	164.1	162.7	8	274.9	151	166	12.1
ANFDEENAYFEDEEEDSSNVDLPYIPAENSPTR	1xPhospho [S30]	Q86XP3	ATP-dependent RNA helicase DDX42 OS=Homo sapiens OX=9606 GN=DDX42 PE=1 SV=1	0.542	0.075	0.115	0.123	0.053	0.228	0.717	1.072	0.465	-0.88	-3.75	-3.12	-3.02	-4.22	-2.13	-0.48	0.1	-1.11	0.998442	0.0421196	0.254764	0.208201	0.0605203	0.360095	0.999915	0.999991	0.935003	314.4	170.4	23.4	36.2	38.8	16.8	63.67	45.19	35.32	86.79	107.89	122.38	416	239.8	97	126.4	130	263.9	29.5
EDDDVIVNKPHVSDEEEEEPPFYHHPFK	1xDeamidated [N8]; 1xPhospho [S13]	P18583	Protein SON OS=Homo sapiens OX=9606 GN=SON PE=1 SV=4	1.031	0.075	0.352	0.406	0.898	0.394	12.019	1.153	2.55	0.04	-3.74	-1.51	-1.3	-0.16	-1.34	3.59	0.21	1.35	1	0.0414393	0.204655	0.622378	0.999892	0.586542	0.0606062	0.940539	0.283692	159.5	164.4	11.9	56.2	64.8	143.2	13.33	12.74	114.81	86.33	11.34	23.27	134.5	175.9	155.9	182	141	160.6	11.6
IHGVNSGSSEGAQPNTENGVPEITDAATDQGPAESPPTSPSSASR	2xDeamidated [N/Q]; 1xPhospho [S/T]	Q8IWE2	Protein NOXP20 OS=Homo sapiens OX=9606 GN=FAM114A1 PE=1 SV=2	0.881	0.075	1.128	0.302	0.449	0.343	6.013	0.268	0.398	-0.18	-3.74	0.17	-1.73	-1.15	-1.54	2.59	-1.9	-1.33	0.727423	0.0250425	1	0.829837	0.796533	0.999941	0.197858	0.84546	0.813431	156.4	137.8	11.7	176.5	47.3	70.3	30.64	74.7	102.42	24.06	110.31	39.55	222.6	132.7	138.2	134	121.8	12.6	3.6
SLSELCLAVPAPGIR	1xPhospho [S]; 1xCarbamidomethyl [C6]	O94827	Pleckstrin homology domain-containing family G member 5 OS=Homo sapiens OX=9606 GN=PLEKHG5 PE=1 SV=4	0.104	0.075	0.094	1.098	0.132	10.522	1.764	11.737	1.416	-3.26	-3.74	-3.42	0.13	-2.92	3.4	0.82	3.55	0.5	0.814653	0.966329	0.898188	0.999666	0.982303	0.661562	0.999997	0.770582	0.998935	239.7	25	18	22.4	263.1	31.8	83.81	59.46	144.11	22.02	76.06	144.7	290.2	244	7.9	25.5	7.1	31.3	8
RATISSPLELEGTVSR	1xPhospho [S/T]	Q96GS4	BLOC-1-related complex subunit 6 OS=Homo sapiens OX=9606 GN=BORCS6 PE=1 SV=2	0.84	0.075	0.217	0.238	0.261	0.283	3.475	1.098	1.206	-0.25	-3.73	-2.21	-2.07	-1.94	-1.82	1.8	0.13	0.27	0.997096	0.123401	0.968735	0.966582	0.939276	0.999362	0.442141	1	0.999991	228.1	191.5	17.1	49.4	54.2	59.6	61.61	78.33	88.66	113.28	94.08	98.63	245.5	196.8	50.9	19.2	165.2	231.6	2.8
YMAENPTAGVVQEEEEDNLEYDSDGNPIAPTKK	1xOxidation [M2]; 1xPhospho [S23]; 1xDeamidated [N/Q]	Q86XP3	ATP-dependent RNA helicase DDX42 OS=Homo sapiens OX=9606 GN=DDX42 PE=1 SV=1	1.182	0.075	0.059	0.875	0.083	0.741	1.101	14.853	1.406	0.24	-3.73	-4.09	-0.19	-3.59	-0.43	0.14	3.89	0.49	0.852714	0.993151	0.787718	0.999999	0.98343	0.886305	0.999996	0.744522	0.986708	183.3	216.6	13.8	10.8	160.4	15.2	89.38	21.39	148.43	62.71	86.76	39.83	1.7	189.4	267.6	223.8	280.7	183.1	3.6
TRSEPLPPSATAPPPPGPMQPR	1xPhospho [S/T]; 1xDeamidated [Q20]	Q8WUI4	Histone deacetylase 7 OS=Homo sapiens OX=9606 GN=HDAC7 PE=1 SV=2	0.136	0.075	1.564	0.059	1.178	0.432	15.654	0.038	0.753	-2.88	-3.73	0.65	-4.09	0.24	-1.21	3.97	-4.74	-0.41	0.922093	0.937485	1	0.556399	1	0.972688	0.937621	0.597185	1	149.5	20.3	11.3	233.9	8.8	176.2	72.03	140.87	154.1	82.73	12.41	79.22	21.8	159.4	186.1	177	4.1	21.6	6.8
SLQTLPTDSSTFDTDTFCPPRPKPVAR	1xDeamidated [Q3]; 1xPhospho [S/T]; 1xCarbamidomethyl [C18]	Q9NQG6	Mitochondrial dynamics protein MIEF1 OS=Homo sapiens OX=9606 GN=MIEF1 PE=1 SV=1	0.257	0.075	0.763	0.325	0.304	1.266	4.041	0.426	0.399	-1.96	-3.73	-0.39	-1.62	-1.72	0.34	2.01	-1.23	-1.32	0.926865	0.257566	0.998739	0.997733	0.851797	0.994356	0.841492	1	0.967243	220.3	56.6	16.6	167.9	71.6	67.1	55.91	85.45	141.92	61.24	93.26	21.33	225	57.9	195.4	32.8	160.8	50.2	14.7
APYTCGGDSDQYVLMSSPVGR	1xCarbamidomethyl [C5]; 1xPhospho [S/T/Y]	Q9Y4H2	Insulin receptor substrate 2 OS=Homo sapiens OX=9606 GN=IRS2 PE=1 SV=2	0.982	0.075	0.798	0.747	0.405	0.76	5.369	0.936	0.507	-0.03	-3.73	-0.33	-0.42	-1.31	-0.4	2.42	-0.1	-0.98	0.99984	0.00080859	0.921874	0.996843	0.215503	0.999925	0.0434986	0.99505	0.679983	149.7	147.1	11.3	119.5	111.8	60.6	12.21	19.65	103.12	35.33	26.04	14.35	132.2	167.9	144.9	107	159.5	142.3	10.9
DAGRPGERGSGGLFSPSTAHVPDGALGQR	1xPhospho [S10]	Q9C0C2	182 kDa tankyrase-1-binding protein OS=Homo sapiens OX=9606 GN=TNKS1BP1 PE=1 SV=4	0.101	0.076	0.056	0.091	0.087	0.894	1.153	1.627	1.565	-3.3	-3.72	-4.17	-3.46	-3.52	-0.16	0.2	0.7	0.65	0.202291	0.155298	0.18554	0.270856	0.165492	0.99994	1	0.999793	1	425.4	43.1	32.2	23.7	38.6	37.1	26.75	123.35	132.35	22.6	22.68	60.25	395.7	272.5	474.7	167.1	40.1	2.5	29.9
SIDDSEMESPVDDVFYPGTGR	1xPhospho [S]	Q14938	Nuclear factor 1 X-type OS=Homo sapiens OX=9606 GN=NFIX PE=1 SV=2	0.046	0.076	0.772	0.059	0.074	1.275	0.973	0.077	0.096	-4.43	-3.72	-0.37	-4.08	-3.76	0.35	-0.04	-3.7	-3.39	0.97797	0.99259	0.998544	0.885487	0.996117	0.99894	1	0.981148	0.999999	296	13.7	22.5	228.4	17.5	21.9	87.7	152.14	131.95	86.68	155.76	140.55	321.8	215.8	8.2	209.3	8.4	10	14.2
RLSLPMDIR	1xPhospho [S3]	Q07002	Cyclin-dependent kinase 18 OS=Homo sapiens OX=9606 GN=CDK18 PE=1 SV=4	0.51	0.076	1.219	0.094	0.782	0.185	10.27	0.077	0.642	-0.97	-3.72	0.29	-3.41	-0.35	-2.44	3.36	-3.7	-0.64	0.837372	0.69425	0.986442	0.734471	0.916877	0.999936	0.995969	0.969907	0.999141	163	83.1	12.4	198.7	15.3	127.5	24.44	91.91	121.19	81.46	153.44	82.18	135.1	217.2	161.8	82.5	142.4	3.1	12.3
RVQSLPSVPLSCAAYR	1xPhospho [S4]; 1xCarbamidomethyl [C12]	Q96AD5	Patatin-like phospholipase domain-containing protein 2 OS=Homo sapiens OX=9606 GN=PNPLA2 PE=1 SV=1	0.133	0.076	0.172	0.066	0.237	0.499	3.109	0.386	1.379	-2.91	-3.71	-2.54	-3.91	-2.08	-1	1.64	-1.37	0.46	0.98258	0.304943	0.991556	0.756836	0.99944	0.981149	0.456063	0.96617	0.999835	356.3	47.4	27.1	61.2	23.6	84.4	79.61	140.46	82.46	124.37	72.66	125.02	267.3	16.8	301.3	9.9	310.5	35.5	22.2
RFTPPSTALSPGK	1xPhospho [T3]	Q01196	Runt-related transcription factor 1 OS=Homo sapiens OX=9606 GN=RUNX1 PE=1 SV=3	0.939	0.077	1.073	1.019	0.868	1.086	11.338	0.95	0.809	-0.09	-3.71	0.1	0.03	-0.2	0.12	3.5	-0.07	-0.31	0.999928	0.0349522	0.999999	1	0.99775	0.999939	0.071215	0.999999	0.994598	120.6	113.2	9.2	129.4	122.9	104.6	7.36	5.62	144.21	11.1	17.38	23.63	128.4	113.5	113.2	106.6	110	98.5	4.2
VYEDSGIPLPAESPK	1xPhospho [S13]	Q8IXM2	Chromatin complexes subunit BAP18 OS=Homo sapiens OX=9606 GN=BAP18 PE=1 SV=1	0.833	0.077	0.862	0.114	0.135	0.137	1.759	0.133	0.156	-0.26	-3.71	-0.21	-3.13	-2.89	-2.87	0.81	-2.92	-2.68	0.971303	0.0614007	0.981321	0.746536	0.773291	0.987713	0.434306	0.980101	0.985764	198.7	165.5	15.2	171.2	22.7	26.7	10.4	72.45	92.22	71.69	130.32	107.78	197.3	206.6	168.5	178.4	164.3	20.1	0.4
VVSAPVGKETPSKR	1xPhospho [T10]	Q13416	Origin recognition complex subunit 2 OS=Homo sapiens OX=9606 GN=ORC2 PE=1 SV=2	1.45	0.077	0.681	0.614	0.637	0.424	8.313	0.902	0.936	0.54	-3.7	-0.55	-0.7	-0.65	-1.24	3.06	-0.15	-0.09	0.644298	0.984592	0.915279	0.894551	0.989613	0.995019	0.809806	1	0.998526	134.6	195.1	10.3	91.6	82.6	85.8	86.06	52.73	99.32	12.91	80.85	57.89	165.1	139.1	1.7	272	79.8	201.7	10.7
IGSDPLAYEPKEDLPVITIDPASPQSPESVDLVNEELK	1xPhospho [S3]; 1xDeamidated [Q25]	P19634	Sodium/hydrogen exchanger 1 OS=Homo sapiens OX=9606 GN=SLC9A1 PE=1 SV=2	0.107	0.077	0.107	1.364	0.79	12.8	10.28	12.722	7.364	-3.23	-3.7	-3.22	0.45	-0.34	3.68	3.36	3.67	2.88	0.191661	0.5107	0.982374	0.925506	0.992537	0.0413497	0.253801	0.603915	0.820163	174.2	18.6	13.4	18.7	237.6	137.6	99.76	81.43	14.46	142.69	20.42	32.3	324.8	8.5	143.9	0.6	16	15.3	10.5
ALSYASLDKEDLLSPINQNTLQR	1xPhospho [S/Y]	Q6R327	Rapamycin-insensitive companion of mTOR OS=Homo sapiens OX=9606 GN=RICTOR PE=1 SV=1	0.152	0.077	0.735	0.16	0.08	1.049	1.034	0.217	0.108	-2.72	-3.7	-0.44	-2.65	-3.65	0.07	0.05	-2.2	-3.21	0.976633	0.645252	0.998199	0.903669	0.44485	0.999555	0.99901	0.988129	0.672543	272.3	41.4	20.9	200.2	43.5	21.7	71.56	121.76	121.34	79.25	103.07	28.04	263.1	268.3	32.7	40	273.3	27.6	11.2
STGVSFWTQDSDENEQEQQSDTEEGSNKK	2xPhospho [S11; S]	O14974	Protein phosphatase 1 regulatory subunit 12A OS=Homo sapiens OX=9606 GN=PPP1R12A PE=1 SV=1	0.651	0.077	0.756	1.006	1.065	1.545	13.847	1.33	1.409	-0.62	-3.7	-0.4	0.01	0.09	0.63	3.79	0.41	0.49	0.865748	0.058396	0.951363	0.99579	0.996952	0.986376	0.122518	0.998923	0.99838	131.7	85.7	10.1	99.6	132.5	140.3	43.86	16.67	138.78	64.8	39.94	29.25	229.3	115.2	112.2	75	87.3	62.3	8.9
NPDGGPLESSSDLAALSPLTSSGHQEQDTELGSTHTAGATSSLTPSR	1xPhospho [S17]	Q7Z434	Mitochondrial antiviral-signaling protein OS=Homo sapiens OX=9606 GN=MAVS PE=1 SV=2	0.667	0.077	0.877	0.671	1.995	1.007	25.915	0.765	2.274	-0.59	-3.7	-0.19	-0.58	1	0.01	4.7	-0.39	1.19	0.945523	0.546532	0.942846	0.942442	0.995102	1	0.822044	1	0.998624	113.5	75.6	8.7	99.6	76.2	226.4	50.88	64.5	155.53	76.68	73.59	84	243	124.5	94.8	85.8	83	15.7	171.6
TQEISRPNSPSEGEGESSDSR	1xPhospho [S]	Q9P2R6	Arginine-glutamic acid dipeptide repeats protein OS=Homo sapiens OX=9606 GN=RERE PE=1 SV=2	0.857	0.077	0.874	0.915	0.504	1.068	6.537	1.047	0.577	-0.22	-3.7	-0.19	-0.13	-0.99	0.09	2.71	0.07	-0.79	0.999837	0.12464	0.999446	0.999633	0.242071	1	0.997451	1	0.372747	141.9	121.6	10.9	124.1	129.9	71.5	25.14	27.6	128.31	5.84	7.14	82.22	136.1	129.6	200.3	167.6	99.7	116.7	75
GNSRPGTPSAEGGSTSSTLR	1xPhospho [S/T]	P35269	General transcription factor IIF subunit 1 OS=Homo sapiens OX=9606 GN=GTF2F1 PE=1 SV=2	0.809	0.077	1.454	1.679	0.303	2.076	3.918	1.155	0.208	-0.31	-3.69	0.54	0.75	-1.72	1.05	1.97	0.21	-2.26	0.987919	0.00037918	0.974658	0.917148	0.164417	0.619891	0.0248586	0.99983	0.0506864	112.7	91.2	8.7	163.9	189.3	34.1	11.15	32.25	89.67	13.81	10.51	9.91	108.9	109.8	131.9	120.5	88.8	62.2	17.6
KQPPVSPGTALVGSQKEPSEVPTPK	2xPhospho [T9; T23]	P17096	High mobility group protein HMG-I/HMG-Y OS=Homo sapiens OX=9606 GN=HMGA1 PE=1 SV=3	0.884	0.077	0.713	0.578	0.965	0.654	12.463	0.811	1.353	-0.18	-3.69	-0.49	-0.79	-0.05	-0.61	3.64	-0.3	0.44	0.82417	0.885945	0.999999	0.991971	0.99999	0.984299	0.826749	0.996252	0.999898	142.2	125.8	11	101.4	82.3	137.3	50.88	86.62	149.43	40.88	78.04	35.33	139.1	52.4	171.3	143.7	0.8	123	210.9
SFTGGLGQLVVPSK	1xPhospho [S/T]	Q9Y3Q8	TSC22 domain family protein 4 OS=Homo sapiens OX=9606 GN=TSC22D4 PE=1 SV=2	0.673	0.078	1.516	1.231	0.491	1.829	6.315	0.812	0.324	-0.57	-3.69	0.6	0.3	-1.03	0.87	2.66	-0.3	-1.63	0.787857	0.000487268	0.985838	0.996403	0.249091	0.525377	0.0207186	0.999978	0.0935512	120.3	81	9.3	182.3	148.1	59	10.25	21.42	101.44	25.47	5.59	26.18	143.4	118.5	123.5	83.1	95.7	61.7	9.6
RSYSLSELSVLQAK	1xPhospho [S/Y]	Q9P0V3	SH3 domain-binding protein 4 OS=Homo sapiens OX=9606 GN=SH3BP4 PE=1 SV=1	0.259	0.078	0.301	0.081	0.804	0.313	10.347	0.269	2.67	-1.95	-3.69	-1.73	-3.63	-0.32	-1.68	3.37	-1.89	1.42	0.66741	0.887909	0.999999	0.739441	0.999755	0.999993	0.765073	0.781876	0.999124	237.8	61.7	18.5	71.6	19.3	191.2	74.4	85.19	157.4	106.5	111.16	29.1	21.8	226.1	206.2	53.5	57.3	0.7	2.8
IIPTLEEGLQLPSPTATSQLPLESDAVECLNYQHYK	2xDeamidated [Q10; N/Q]; 1xPhospho [S/T]; 1xCarbamidomethyl [C29]	P61978	Heterogeneous nuclear ribonucleoprotein K OS=Homo sapiens OX=9606 GN=HNRNPK PE=1 SV=1	0.45	0.078	0.722	0.773	1.15	1.718	14.766	1.071	1.594	-1.15	-3.68	-0.47	-0.37	0.2	0.78	3.88	0.1	0.67	0.866856	0.395976	0.987234	0.999678	0.95695	0.956077	0.840873	0.999264	0.999935	143.8	64.7	11.2	103.8	111.1	165.4	37.52	73.72	13.27	75.16	99.97	86.61	167.5	165.6	77.6	74.5	7.8	75.5	12.9
DDEEMNTWIQAISSAISSDKHEVSASTQSTPASSR	1xDeamidated [Q10]; 2xPhospho [S/T]	Q01082	Spectrin beta chain, non-erythrocytic 1 OS=Homo sapiens OX=9606 GN=SPTBN1 PE=1 SV=2	0.978	0.078	0.41	0.326	0.418	0.334	5.352	0.796	1.021	-0.03	-3.68	-1.29	-1.62	-1.26	-1.58	2.42	-0.33	0.03	0.966135	0.0252846	0.692609	0.580266	0.790875	0.944533	0.202934	0.999947	0.999963	186.9	182.7	14.6	76.6	61	78.2	57.64	77.08	110.72	36.09	32.75	27.57	340	100.3	190	185.8	265.7	25.2	52.5
IEEPVSMEMDNHMSDKDESCYDNAEAAFSDDEEDLNSK	1xCarbamidomethyl [C20]; 1xPhospho [S29]	Q68E01	Integrator complex subunit 3 OS=Homo sapiens OX=9606 GN=INTS3 PE=1 SV=1	0.846	0.078	0.098	0.058	0.059	0.069	0.756	0.594	0.604	-0.24	-3.67	-3.35	-4.1	-4.08	-3.86	-0.4	-0.75	-0.73	0.999895	0.892548	0.94522	0.84348	0.941841	0.927495	0.999982	0.999635	1	280.4	237.1	22	27.5	16.3	16.6	86.55	82.51	133.58	133.98	96.68	137.43	370.9	247.9	12.5	250.2	209.6	9.3	7.4
TNSMSSSGLGSPNRSSPSIICMPK	2xPhospho [S/T]; 1xDeamidated [N]; 1xCarbamidomethyl [C21]	Q9NZN8	CCR4-NOT transcription complex subunit 2 OS=Homo sapiens OX=9606 GN=CNOT2 PE=1 SV=1	1.37	0.078	0.062	0.114	0.645	0.083	8.224	1.842	10.404	0.45	-3.67	-4.01	-3.13	-0.63	-3.58	3.04	0.88	3.38	0.998987	0.880555	0.538771	0.86119	1	0.678263	0.906769	0.988705	0.579603	183.5	251.3	14.4	11.4	21	118.4	78.17	77.92	130.44	81.41	143.6	63.03	18	235.7	180.7	28.8	341.9	247.6	14.2
SSHYGGSLPNVNQIGSGLAEFQSPLHSPLDSSR	1xPhospho [S7]	Q53ET0	CREB-regulated transcription coactivator 2 OS=Homo sapiens OX=9606 GN=CRTC2 PE=1 SV=2	1.457	0.079	1.31	1.12	0.959	0.769	12.191	0.855	0.732	0.54	-3.67	0.39	0.16	-0.06	-0.38	3.61	-0.23	-0.45	1	0.792207	0.989386	0.999978	1	0.999988	0.807193	0.969452	0.991609	101.3	147.5	8	132.7	113.4	97.1	71.33	85.31	72.59	87.42	82.04	94.03	128.5	121.5	15.7	177	6.4	236.1	3.2
HNQGDSDDDVEETHPMDGNDSDYDPKK	1xPhospho [S6]; 1xDeamidated [N19]	Q9P2K3	REST corepressor 3 OS=Homo sapiens OX=9606 GN=RCOR3 PE=1 SV=2	0.321	0.079	0.739	0.69	0.477	2.15	6.063	0.933	0.645	-1.64	-3.67	-0.44	-0.54	-1.07	1.1	2.6	-0.1	-0.63	0.680986	0.0226913	0.994673	0.997998	0.795655	0.885279	0.181716	0.999998	0.969827	181.5	58.2	14.3	134.2	125.2	86.6	17.48	48.25	131.41	19.81	40.04	45.11	168.8	129.2	183.4	111.6	49.4	54.1	4.1
SESAPTLHPYSPLSPK	2xPhospho [S/T]	Q8WUF5	RelA-associated inhibitor OS=Homo sapiens OX=9606 GN=PPP1R13L PE=1 SV=4	0.894	0.079	0.081	0.553	1.132	0.619	14.268	6.84	13.995	-0.16	-3.66	-3.63	-0.85	0.18	-0.69	3.83	2.77	3.81	0.999952	0.0730976	0.0872339	0.999999	0.819085	0.999671	0.00939655	0.0749251	0.0112524	160.4	143.5	12.7	13	88.8	181.6	74.41	75.17	30.63	28.14	15.61	19.77	219.8	174.7	22.4	199.2	156.2	19.4	18.6
FTSGAFLSPSVSVQECRTPR	1xDeamidated [Q14]; 1xCarbamidomethyl [C16]; 1xPhospho [S/T]	P52948	Nuclear pore complex protein Nup98-Nup96 OS=Homo sapiens OX=9606 GN=NUP98 PE=1 SV=4	0.077	0.08	1.315	0.08	0.053	1.035	0.66	0.061	0.04	-3.69	-3.65	0.4	-3.64	-4.25	0.05	-0.6	-4.04	-4.64	0.929524	0.736219	0.990605	0.706105	0.247544	0.995111	0.920115	0.38732	0.101692	230.4	17.8	18.4	302.9	18.4	12.1	81.04	144.48	28.95	78.84	31.86	82.32	11.6	267.3	262.8	228.6	8.3	20.3	15.4
YSSCSTIFLDDSTVSQPNLR	1xPhospho [S/T]; 1xCarbamidomethyl [C4]	Q8N7R7	Cyclin-Y-like protein 1 OS=Homo sapiens OX=9606 GN=CCNYL1 PE=1 SV=2	0.663	0.08	0.921	0.103	0.743	0.155	9.268	0.112	0.807	-0.59	-3.64	-0.12	-3.28	-0.43	-2.69	3.21	-3.16	-0.31	1	0.830063	0.998137	0.983957	0.999947	0.983179	0.909084	0.999844	0.999923	170.9	113.3	13.7	157.4	17.6	127.1	78.3	76.42	150.27	85.16	132.92	78.93	198.7	200.1	13.2	131.7	20.9	197	0.6
TVMDGGLESDGPNMTENGLEDESRPQR	1xPhospho [S/T]; 1xDeamidated [N/Q]	P51116	RNA-binding protein FXR2 OS=Homo sapiens OX=9606 GN=FXR2 PE=1 SV=2	0.836	0.08	2.368	1.232	1.6	1.474	19.932	0.52	0.675	-0.26	-3.64	1.24	0.3	0.68	0.56	4.32	-0.94	-0.57	0.999998	0.0129699	0.570844	0.953527	0.765152	0.972324	0.00149225	0.955288	0.999163	84.3	70.5	6.8	199.7	103.8	134.9	32.94	23.29	122.51	39.17	14.21	5.17	86.5	92.7	46.9	62.3	97.2	72.3	6.9
SSVKTPEPVVPTAPELQPSTSTDQPVTSEPTYQATR	1xPhospho [T5]; 2xDeamidated [Q17; Q24]	Q14676	Mediator of DNA damage checkpoint protein 1 OS=Homo sapiens OX=9606 GN=MDC1 PE=1 SV=3	0.487	0.08	0.469	0.486	0.665	0.999	8.26	1.036	1.417	-1.04	-3.64	-1.09	-1.04	-0.59	0	3.05	0.05	0.5	0.997988	0.632353	0.876541	0.9618	0.973308	0.998581	0.955617	0.999656	0.999065	188.3	91.6	15.1	88.3	91.5	125.1	140.97	148.68	134.82	152.32	54.23	42.73	607.9	22.3	64.8	409.9	11.5	31.5	5.2
KLSTTGSSDSITPVAPTSAVSSSGSPASVMTNMR	1xPhospho [S/T]; 1xDeamidated [N32]	Q15714	TSC22 domain family protein 1 OS=Homo sapiens OX=9606 GN=TSC22D1 PE=1 SV=3	0.207	0.08	0.108	0.059	0.09	0.286	1.116	0.548	0.831	-2.27	-3.64	-3.21	-4.08	-3.48	-1.8	0.16	-0.87	-0.27	0.984566	0.423555	0.959689	0.846642	0.902984	0.994614	0.932238	0.999131	0.999933	388.5	80.3	31.3	42	23	34.9	62.83	109.19	81.45	144.51	155.43	133.56	44.7	223.2	221	214.8	45.7	25.3	17.8
AVGMPSPVSPK	1xPhospho [S]	Q9UHB7	AF4/FMR2 family member 4 OS=Homo sapiens OX=9606 GN=AFF4 PE=1 SV=1	0.689	0.081	0.48	0.516	0.769	0.75	9.494	1.075	1.601	-0.54	-3.63	-1.06	-0.95	-0.38	-0.42	3.25	0.1	0.68	0.937565	0.598935	0.469868	0.9947	0.999985	0.998415	0.686018	0.756681	0.554202	169.8	116.9	13.7	81.5	87.6	130.5	26.81	69.83	140.82	82.67	5.23	19.02	106.7	180.7	175.9	121.1	128.5	17.4	192.8
TEPAAEAEAASGPSESPSPPAAEELPGSHAEPPVPAQGEAPGEQARDER	1xPhospho [S]; 2xDeamidated [Q37; Q44]	P55884	Eukaryotic translation initiation factor 3 subunit B OS=Homo sapiens OX=9606 GN=EIF3B PE=1 SV=3	0.096	0.081	0.062	0.009	0.01	0.098	0.118	0.154	0.155	-3.38	-3.63	-4.02	-6.72	-6.71	-3.35	-3.09	-2.7	-2.69	0.574716	0.970521	0.573974	0.19433	0.0895313	0.952286	0.283064	0.952579	0.760007	477	45.9	38.6	29.4	4.5	4.6	78.65	64.77	129.91	69.02	142.16	150.8	473.5	33.2	527	46.8	8.5	45.6	36.3
SNSQSYIGRPIHLDK	1xPhospho [S]	Q15139	Serine/threonine-protein kinase D1 OS=Homo sapiens OX=9606 GN=PRKD1 PE=1 SV=2	0.034	0.081	0.915	0.104	0.774	3.027	9.542	0.113	0.847	-4.87	-3.62	-0.13	-3.27	-0.37	1.6	3.25	-3.14	-0.24	0.355314	0.26384	0.999999	0.731334	0.999817	0.979319	0.370835	0.779981	0.99998	206.3	7.1	16.7	188.7	21.4	159.8	75.99	103.64	87.37	75.01	18.68	83.5	290.6	24.3	268.7	38	4.9	9.2	1.1
RVPGSSGHLHKTEDGDWEWSDDEMDEKSEEGK	2xPhospho [S6; S20]	Q9UEW8	STE20/SPS1-related proline-alanine-rich protein kinase OS=Homo sapiens OX=9606 GN=STK39 PE=1 SV=3	0.127	0.081	1.658	1.574	0.128	12.379	1.582	0.95	0.078	-2.98	-3.62	0.73	0.65	-2.96	3.63	0.66	-0.07	-3.69	0.1993	0.0121796	0.766883	0.998362	0.134396	0.107317	0.70306	0.93176	0.0148441	131.3	16.7	10.7	217.7	206.7	16.9	36.42	109.48	33.82	9.31	56.53	80.9	136.8	69.5	150.2	100.1	17.4	15.2	9.1
GTLSDSEIETNSATSTIFGK	1xPhospho [S/T]	Q8WXG6	MAP kinase-activating death domain protein OS=Homo sapiens OX=9606 GN=MADD PE=1 SV=2	0.101	0.081	0.168	0.217	0.237	2.143	2.912	1.296	1.412	-3.3	-3.62	-2.58	-2.2	-2.08	1.1	1.54	0.37	0.5	0.043066	0.0257444	0.487092	0.34847	0.102154	0.754585	0.956565	0.999721	0.871513	332.6	33.7	27	55.7	72.2	78.7	10.19	16.36	49.32	123.11	112.77	54.39	290.3	240.5	249.7	25.2	33.1	25.3	15.1
GSPGEEWAPEVGEDAPQR	1xPhospho [S2]	Q9NZ56	Formin-2 OS=Homo sapiens OX=9606 GN=FMN2 PE=1 SV=4	0.169	0.081	0.749	0.872	0.878	5.176	10.77	1.165	1.172	-2.57	-3.62	-0.42	-0.2	-0.19	2.37	3.43	0.22	0.23	0.949057	0.57772	0.999979	1	0.996328	0.959963	0.33284	0.999997	0.985796	160.1	27	13	119.8	139.6	140.5	67.69	114.49	145.82	69.48	67.32	6.29	168.6	169.6	26.6	28.4	147.1	15	13.7
TLEDEEEMWFNTDEDDMEDGEAVVSPSDKTK	1xPhospho [S]	Q6IN85	Serine/threonine-protein phosphatase 4 regulatory subunit 3A OS=Homo sapiens OX=9606 GN=PPP4R3A PE=1 SV=1	0.024	0.082	1.069	0.085	1.301	3.478	15.903	0.079	1.217	-5.36	-3.61	0.1	-3.56	0.38	1.8	3.99	-3.66	0.28	0.32511	0.718489	1	0.904993	0.933753	0.855857	0.25251	0.886775	0.946868	168.5	4.1	13.8	180.1	14.3	219.2	78.79	118.65	33.98	88.16	157.75	7.77	10.9	178.7	165.7	19.4	4	1.3	13.6
RASAGPAPGPVVTAEGLHPSLPSPTGNSTPLGSSK	1xPhospho [S3]; 1xDeamidated [N27]	Q4KMP7	TBC1 domain family member 10B OS=Homo sapiens OX=9606 GN=TBC1D10B PE=1 SV=3	0.939	0.082	2.179	1.141	1.441	1.216	17.597	0.524	0.661	-0.09	-3.61	1.12	0.19	0.53	0.28	4.14	-0.93	-0.6	0.999589	0.361894	0.768445	0.999536	0.99616	1	0.184948	0.903791	0.952569	88.5	83	7.2	192.8	101	127.5	82.2	104.74	85.25	25.52	80.25	80.97	4.5	112.8	93.4	87.6	234.6	7.6	7.6
GVDFESSEDDDDDPFMNTSSLRR	2xPhospho [S6; S7]	P49959	Double-strand break repair protein MRE11 OS=Homo sapiens OX=9606 GN=MRE11 PE=1 SV=3	0.175	0.082	0.852	0.462	0.342	2.643	4.173	0.542	0.401	-2.52	-3.61	-0.23	-1.11	-1.55	1.4	2.06	-0.88	-1.32	0.431801	0.333446	1	0.923903	0.978471	0.917807	0.708142	0.899121	0.966821	206	36	16.9	175.6	95.1	70.4	47.82	62.25	150.11	27.63	61.95	112.05	218.5	74.4	162.8	14.5	28.4	54.3	5.3
NSTELAPPLPVR	1xPhospho [S2]	Q9H7D0	Dedicator of cytokinesis protein 5 OS=Homo sapiens OX=9606 GN=DOCK5 PE=1 SV=3	1.067	0.082	0.839	0.909	0.586	0.852	7.142	1.083	0.698	0.09	-3.61	-0.25	-0.14	-0.77	-0.23	2.84	0.12	-0.52	0.853177	0.362284	0.900964	0.944165	0.999714	0.99977	0.248434	0.999989	0.971501	133.9	142.8	11	112.3	121.6	78.4	75.11	12.18	122.79	26.68	18.84	25.03	132.9	156.9	14.6	141.7	119.4	152.2	7.6
ISDAELEAELEK	1xPhospho [S2]	Q8WUX9	Charged multivesicular body protein 7 OS=Homo sapiens OX=9606 GN=CHMP7 PE=1 SV=1	0.648	0.082	7.81	6.253	5.517	9.652	67.13	0.801	0.706	-0.63	-3.6	2.97	2.64	2.46	3.27	6.07	-0.32	-0.5	0.931565	0.0325797	0.42484	0.594821	0.971242	0.181249	0.00922967	0.999514	0.832167	28.2	18.2	2.3	219.9	176.1	155.3	117.83	47.51	113.7	10.95	23.67	79.04	15.1	158.8	28.4	30.1	18.4	11.3	8.3
MELGAPEEMGQVPPLDSRPSSPALYFTHDASLVHK	2xPhospho [S20; S]	Q9Y3Q8	TSC22 domain family protein 4 OS=Homo sapiens OX=9606 GN=TSC22D4 PE=1 SV=2	0.154	0.082	1.003	1.413	0.126	9.156	1.526	1.409	0.125	-2.7	-3.6	0	0.5	-2.99	3.19	0.61	0.49	-3	0.881707	0.843324	0.999987	0.953593	0.784763	0.999872	0.999995	0.913259	0.705932	158.8	24.5	13.1	159.3	224.4	20	82.92	59.25	48.72	88.45	88.22	78.73	21.3	286.7	173.8	26.8	7.7	33.9	11.5
KDSLPDADLASCGSLSQSSASFFTPR	1xPhospho [S]; 1xCarbamidomethyl [C12]	Q86SQ0	Pleckstrin homology-like domain family B member 2 OS=Homo sapiens OX=9606 GN=PHLDB2 PE=1 SV=2	0.567	0.083	0.795	0.096	0.057	0.169	0.689	0.121	0.071	-0.82	-3.6	-0.33	-3.38	-4.14	-2.56	-0.54	-3.05	-3.81	0.908392	0.616804	1	0.402228	0.417072	0.914621	0.998949	0.436938	0.452439	230.9	131	19.1	183.7	22.2	13.1	28.13	75.33	123.41	11.5	145.03	142.93	216.7	199.8	122	113.4	13.1	139.7	16.5
VVKPESNDKETEAAYESDIPEELCGHHLPQQSLK	1xPhospho [S/Y]; 1xCarbamidomethyl [C24]	Q8IYB7	DIS3-like exonuclease 2 OS=Homo sapiens OX=9606 GN=DIS3L2 PE=1 SV=4	0.205	0.083	2.403	2.005	0.184	9.791	2.211	0.834	0.077	-2.29	-3.59	1.27	1	-2.44	3.29	1.14	-0.26	-3.71	0.998699	0.973982	0.99499	0.999928	0.999978	0.989951	0.991481	0.999607	0.982242	102	20.9	8.5	245.2	204.6	18.8	90.91	150.49	140.31	79.93	91.37	141.29	7.5	160.5	84.5	5	231.2	17.3	7
GPLDGSPYAQVQRPPR	1xPhospho [Y8]	Q63HR2	Tensin-2 OS=Homo sapiens OX=9606 GN=TNS2 PE=1 SV=2	1.232	0.083	2.462	1.811	1.704	1.47	20.412	0.736	0.692	0.3	-3.58	1.3	0.86	0.77	0.56	4.35	-0.44	-0.53	0.998262	0.35038	0.762023	0.910409	0.951835	0.98952	0.0991924	0.999252	0.995811	72.4	89.2	6	178.1	131.1	123.3	104.66	37.84	149.26	16.59	18.49	23.43	72.2	202.1	8.5	89	96.7	43.3	68.1
DGKSPTVPCLQEEAGEPLGGK	1xPhospho [S4]; 1xCarbamidomethyl [C9]; 1xDeamidated [Q11]	A1L390	Pleckstrin homology domain-containing family G member 3 OS=Homo sapiens OX=9606 GN=PLEKHG3 PE=1 SV=1	0.258	0.084	0.275	1.716	2.344	6.643	28.059	6.244	8.53	-1.95	-3.58	-1.86	0.78	1.23	2.73	4.81	2.64	3.09	0.915564	0.166227	0.993481	0.731466	0.478654	0.239458	0.00788853	0.432783	0.238849	105.7	27.3	8.8	29	181.4	247.8	63.02	122.06	65.11	112.73	17.37	5.63	110.6	21.4	98.8	135.7	25.5	8.5	5.8
LMHNASDSEVDQDDVVEWK	1xPhospho [S6]; 1xDeamidated [Q12]	Q9H2P0	Activity-dependent neuroprotector homeobox protein OS=Homo sapiens OX=9606 GN=ADNP PE=1 SV=1	0.179	0.084	0.834	0.066	0.17	0.367	2.034	0.079	0.204	-2.48	-3.58	-0.26	-3.93	-2.56	-1.45	1.02	-3.67	-2.29	0.982599	0.82002	1	0.697408	0.949249	0.964574	0.998998	0.711871	0.955117	257.2	46.1	21.5	214.6	16.9	43.7	64.09	114.83	139.32	77.55	134.23	102.12	204.7	38.3	198.2	28.1	219.3	35.5	197.9
RSSTSGDTEEEEEEEVVPFSSDEQKR	2xPhospho [T4; T8]	O15231	Zinc finger protein 185 OS=Homo sapiens OX=9606 GN=ZNF185 PE=1 SV=3	0.131	0.084	0.171	0.865	0.108	6.599	1.287	5.07	0.631	-2.93	-3.58	-2.55	-0.21	-3.22	2.72	0.36	2.34	-0.66	0.830881	0.88325	1	0.997449	0.820701	0.594743	0.999988	0.99708	0.826669	254.5	33.3	21.3	43.4	220.1	27.4	83.56	58.61	60.57	104.4	81.6	30.3	274.2	291.8	7	10.3	44.3	35.9	22.9
NSNSYGIPEPAHAYAQPQTTTPLPAVSGSPGAAITPLPSTQNGPVFAK	1xPhospho [S/T/Y]; 1xDeamidated [N/Q]	P46109	Crk-like protein OS=Homo sapiens OX=9606 GN=CRKL PE=1 SV=1	1.271	0.084	1.168	0.039	1.151	0.031	13.728	0.033	0.985	0.35	-3.58	0.22	-4.68	0.2	-5.02	3.78	-4.9	-0.02	0.999997	0.969942	1	0.955386	0.996782	0.975324	0.821544	0.945798	0.99794	127.3	161.8	10.7	148.7	5	146.6	121.09	116.27	164.29	115.93	169.51	84.79	59.5	243.4	5.8	249.9	75.6	2.5	187.5
AQSPSYVISTGVSPSR	1xPhospho [S3]	Q99569	Plakophilin-4 OS=Homo sapiens OX=9606 GN=PKP4 PE=1 SV=2	0.888	0.084	1.203	0.916	0.947	1.031	11.284	0.761	0.787	-0.17	-3.57	0.27	-0.13	-0.08	0.04	3.5	-0.39	-0.35	0.871992	0.00247275	0.989744	0.999999	1	0.830489	0.00270401	0.980121	0.993464	119.1	105.8	10	143.3	109.1	112.8	4.39	55.24	73.52	60.8	22.77	15.24	129.9	127.7	119.5	31.7	117.1	113.4	24.5
VPSSDEEVVEEPQSR	2xPhospho [S3; S4]	Q9C0C2	182 kDa tankyrase-1-binding protein OS=Homo sapiens OX=9606 GN=TNKS1BP1 PE=1 SV=4	0.305	0.084	0.567	0.161	0.132	0.526	1.561	0.283	0.232	-1.71	-3.57	-0.82	-2.64	-2.92	-0.93	0.64	-1.82	-2.11	0.97432	0.246585	0.869846	0.709323	0.340396	0.978034	0.999874	0.999375	0.905425	266.7	81.5	22.5	151.4	42.8	35.1	74.31	91.61	26.57	80.33	36.3	55.43	41.6	383.9	286.6	256.5	35	87.5	24.2
MQNNSSPSISPNTSFTSDGSPSPLGGIK	1xDeamidated [N/Q]; 1xPhospho [S]	Q9H0D6	5'-3' exoribonuclease 2 OS=Homo sapiens OX=9606 GN=XRN2 PE=1 SV=1	0.079	0.085	0.063	0.106	0.052	1.34	0.611	1.671	0.818	-3.67	-3.56	-3.98	-3.24	-4.27	0.42	-0.71	0.74	-0.29	0.795685	0.716293	0.484112	0.884683	0.533681	0.999942	0.999418	0.969238	0.999999	433.6	34.2	36.7	27.4	45.8	22.4	83.19	151.88	42.14	73.49	25.76	73.52	15.8	515.7	441.3	413.2	2.9	34.8	16.1
HMTQEVVTQYYR	1xPhospho [T3]	Q9UBE8	Serine/threonine-protein kinase NLK OS=Homo sapiens OX=9606 GN=NLK PE=1 SV=2	0.076	0.085	0.115	0.903	0.112	11.843	1.324	7.86	0.977	-3.71	-3.56	-3.12	-0.15	-3.16	3.57	0.4	2.97	-0.03	0.555008	0.820853	0.372196	0.999752	0.463587	0.409765	0.984311	0.258919	0.999965	261.9	20	22.2	30.1	236.4	29.4	63.46	97.04	136.82	123.18	4.89	96.77	241.4	292.6	55.6	18.4	63.1	8.5	20.5
AEAQQVEALPGPSLDQWHRSAGEEEDGPVLTDEQK	1xPhospho [S]	Q66PJ3	ADP-ribosylation factor-like protein 6-interacting protein 4 OS=Homo sapiens OX=9606 GN=ARL6IP4 PE=1 SV=3	0.009	0.085	0.083	0.019	0.06	1.997	0.712	0.223	0.726	-6.75	-3.56	-3.59	-5.75	-4.05	1	-0.49	-2.16	-0.46	0.121342	0.743638	0.984946	0.692684	0.953862	0.749989	0.993775	0.958677	0.999949	477.5	4.4	40.5	39.8	8.9	28.9	82.78	101.86	21.16	137.48	163.2	141.8	405.3	311	17.2	1.8	2.9	12.2	26.4
SSPTEGCNDAFVEVGMPRSPSHSGNAGDLK	1xCarbamidomethyl [C7]; 2xDeamidated [N8; N25]; 1xPhospho [S19]	Q9H694	Protein bicaudal C homolog 1 OS=Homo sapiens OX=9606 GN=BICC1 PE=1 SV=2	0.764	0.085	0.018	0.103	1.233	0.135	14.506	5.793	69.343	-0.39	-3.56	-5.81	-3.28	0.3	-2.89	3.86	2.53	6.12	0.93299	0.77885	0.386442	0.88251	0.995343	0.999986	0.961101	0.926796	0.658449	187.4	143.1	15.9	3.3	19.3	231	5.96	84.74	147.99	167.45	140.78	80.08	157.3	176.6	163.3	124.7	154.3	3.6	13.9
LGGEAAHLPHLRPLPESQPSSSPLLQTAPGVK	1xPhospho [S]	Q9Y618	Nuclear receptor corepressor 2 OS=Homo sapiens OX=9606 GN=NCOR2 PE=1 SV=3	0.37	0.085	1.115	1.186	0.951	3.201	11.183	1.064	0.853	-1.43	-3.56	0.16	0.25	-0.07	1.68	3.48	0.09	-0.23	0.907895	0.0936556	0.995785	0.939924	0.999738	0.445572	0.0598183	0.998091	0.999919	127.5	47.2	10.8	142.1	151.2	121.2	41.35	51.25	125.59	105.12	51.78	4.19	102.2	46.5	114.8	68.3	37.8	24.7	2.3
SNTPSPLNLSSTSSK	1xPhospho [T3]	O60315	Zinc finger E-box-binding homeobox 2 OS=Homo sapiens OX=9606 GN=ZEB2 PE=1 SV=1	0.55	0.085	0.725	0.873	0.228	1.587	2.678	1.204	0.315	-0.86	-3.55	-0.46	-0.2	-2.13	0.67	1.42	0.27	-1.67	0.986094	0.146503	0.998951	0.999999	0.867049	0.992731	0.62158	0.999713	0.970949	173.4	95.4	14.8	125.7	151.3	39.5	25.78	41.97	147.66	22.56	19.42	96.88	159.7	163.9	99	128.8	53.3	87.9	2.6
SPSPAHIVSNK	1xPhospho [S3]	Q9NQB0	Transcription factor 7-like 2 OS=Homo sapiens OX=9606 GN=TCF7L2 PE=1 SV=2	1.15	0.085	1.253	1.372	1.294	1.194	15.144	1.096	1.033	0.2	-3.55	0.33	0.46	0.37	0.26	3.92	0.13	0.05	0.996945	0.0273538	0.996815	0.988003	0.999248	0.999982	0.0154477	0.999984	0.999995	97.5	112.1	8.3	122.1	133.8	126.1	27.09	22.45	133.21	6.6	7.79	22.67	63.9	97.4	112.1	152.9	100.9	112	49.4
VVKPESNDKETEAAYESDIPEELCGHHLPQQSLK	1xPhospho [S]; 1xCarbamidomethyl [C24]; 2xDeamidated [Q30; N/Q]	Q8IYB7	DIS3-like exonuclease 2 OS=Homo sapiens OX=9606 GN=DIS3L2 PE=1 SV=4	1.024	0.086	0.114	0.116	2.489	0.113	29.094	1.017	21.836	0.03	-3.55	-3.13	-3.11	1.32	-3.14	4.86	0.02	4.45	0.999877	0.910915	0.999874	0.922754	0.99997	0.974928	0.842437	0.975118	0.998121	124.3	127.3	10.6	14.2	14.4	309.2	110.57	89.13	152.83	155.52	33.53	85.89	310.5	4.5	107.5	110.2	163.8	2.5	116.4
MGSSQRRTGPSKQHLAPPTMPTSPSSEQVGEATSPTK	2xOxidation [M1; M20]; 2xDeamidated [Q5; Q13]; 2xPhospho [T8; S34]	P56696	Potassium voltage-gated channel subfamily KQT member 4 OS=Homo sapiens OX=9606 GN=KCNQ4 PE=1 SV=2	0.157	0.086	0.119	0.136	0.135	0.869	1.573	1.146	1.137	-2.67	-3.54	-3.07	-2.88	-2.89	-0.2	0.65	0.2	0.19	0.888579	0.265562	0.597877	0.936974	0.91229	0.999986	0.775434	0.975814	0.985751	367.6	57.6	31.5	43.6	50	49.6	67.07	131.75	76.73	25.62	115.56	122.37	45.5	283.4	275.7	15.9	43.2	306.8	46.1
ELPPPSEEIKTGEDEDEEDNDALLKENESPDVR	1xPhospho [S29]	Q96FV9	THO complex subunit 1 OS=Homo sapiens OX=9606 GN=THOC1 PE=1 SV=1	1.093	0.086	0.877	0.107	0.925	0.098	10.723	0.123	1.054	0.13	-3.54	-0.19	-3.22	-0.11	-3.35	3.42	-3.03	0.08	0.835546	0.524499	0.999935	0.286724	0.908612	0.888204	0.970343	0.376257	0.962669	146.7	160.4	12.7	128.7	15.8	135.7	30.32	83.94	139.1	16.17	24.98	77.19	145.6	229.8	135.7	159.2	183.5	4.4	160.1
TPTPSTPGDTQPNTPAPVPPAEDGIKIEENSLKEEESIEGEK	1xPhospho [T14]; 1xDeamidated [N/Q]	Q14839	Chromodomain-helicase-DNA-binding protein 4 OS=Homo sapiens OX=9606 GN=CHD4 PE=1 SV=2	0.235	0.086	1.034	1.11	0.225	4.726	2.612	1.073	0.218	-2.09	-3.54	0.05	0.15	-2.15	2.24	1.39	0.1	-2.2	0.569498	0.640891	1	0.999998	0.995541	0.513462	0.887939	1	0.992959	162.6	38.2	14	168.1	180.4	36.6	63.29	127.57	34.3	57.37	69.31	89.43	200.3	168.3	38.2	173.8	0.5	39.5	25.1
SSSQSTFHIPLSPVEVKPGNVR	1xDeamidated [Q4]; 1xPhospho [S12]	O15085	Rho guanine nucleotide exchange factor 11 OS=Homo sapiens OX=9606 GN=ARHGEF11 PE=1 SV=1	0.887	0.086	0.083	0.084	0.014	0.095	0.159	1.009	0.165	-0.17	-3.53	-3.58	-3.57	-6.18	-3.4	-2.65	0.01	-2.6	1	0.713448	0.896709	0.908543	0.450792	0.926121	0.9965	1	0.950293	278.4	247.1	24	23.2	23.4	3.8	33.3	20.09	155.91	146.52	148.29	169.58	193.2	95.3	160.8	103.8	142.7	155.6	1.6
ISDAELEAELEKLSLSEGGLVPSSK	1xPhospho [S2]	Q8WUX9	Charged multivesicular body protein 7 OS=Homo sapiens OX=9606 GN=CHMP7 PE=1 SV=1	0.102	0.087	0.058	0.041	0.085	0.401	0.973	0.712	1.467	-3.29	-3.52	-4.12	-4.61	-3.56	-1.32	-0.04	-0.49	0.55	0.0216515	0.0036143	0.00153398	0.000103333	0.0044893	0.041136	0.999992	0.467193	0.981932	437.2	44.7	38	25.2	17.9	37	45.25	100.18	9.59	54.32	65.88	23.87	643.3	357.4	276.6	26.1	36.5	159.4	27.4
MLQDDDDTVHLPFEGGSLLQIPVK	1xDeamidated [Q]; 1xPhospho [S/T]	Q9Y6M7	Sodium bicarbonate cotransporter 3 OS=Homo sapiens OX=9606 GN=SLC4A7 PE=1 SV=2	1.555	0.087	1.037	0.076	0.2	0.049	2.291	0.073	0.192	0.64	-3.52	0.05	-3.72	-2.33	-4.35	1.2	-3.77	-2.38	0.999644	0.385783	0.998484	0.189534	0.754916	0.288217	0.981876	0.330697	0.923217	151.7	235.9	13.2	157.4	11.5	30.3	59.15	84.11	56.45	77.31	106.83	29.37	247.1	58.7	177	275.1	354.8	11.3	13.3
SSPKEELHPAAPSQLAPSFSSSSSSSSGPR	1xPhospho [S]	O43166	Signal-induced proliferation-associated 1-like protein 1 OS=Homo sapiens OX=9606 GN=SIPA1L1 PE=1 SV=4	0.086	0.087	1.31	1.112	1.06	12.938	12.16	0.849	0.809	-3.54	-3.52	0.39	0.15	0.08	3.69	3.6	-0.24	-0.31	0.49769	0.703336	0.999997	0.955751	0.935851	0.917921	0.993752	0.928622	0.902501	128.9	11.1	11.2	168.9	143.3	136.6	15.07	146.15	134.86	23.59	81.75	81.97	124.5	133.1	164.8	11.4	3.1	123.6	10.7
FFDENESPVDPQHGSK	1xPhospho [S7]	Q6P4E1	Protein GOLM2 OS=Homo sapiens OX=9606 GN=GOLM2 PE=1 SV=2	0.697	0.088	0.982	0.815	0.144	1.17	1.633	0.83	0.146	-0.52	-3.51	-0.03	-0.29	-2.8	0.23	0.71	-0.27	-2.77	0.988149	0.905059	0.982217	0.985191	0.997021	1	0.991894	1	0.863795	161	112.3	14.2	158.1	131.3	23.1	84.88	36.13	153.58	56.56	43.4	48.31	178.7	204.2	3.4	145.7	67.1	124.6	0.9
DWSLSKSQVIAEKAPEPDLMSPTR	1xPhospho [S7]; 1xDeamidated [Q8]	Q9H7D0	Dedicator of cytokinesis protein 5 OS=Homo sapiens OX=9606 GN=DOCK5 PE=1 SV=3	0.253	0.088	1.86	0.088	2.357	0.348	26.678	0.047	1.267	-1.99	-3.5	0.9	-3.51	1.24	-1.52	4.74	-4.4	0.34	0.951647	0.482906	0.792091	0.533873	0.293247	0.94184	0.0153307	0.0883117	0.924441	106.3	26.8	9.4	197.7	9.3	250.5	76.79	44.17	114.41	53.29	99.68	54.55	124.2	102.2	10.1	41.7	25.8	17.2	9
SRSLSNSNPDISGTPTSPDDEVR	2xPhospho [S]	Q96N67	Dedicator of cytokinesis protein 7 OS=Homo sapiens OX=9606 GN=DOCK7 PE=1 SV=4	1.134	0.088	1.146	1.852	1.507	1.634	17.035	1.616	1.314	0.18	-3.5	0.2	0.89	0.59	0.71	4.09	0.69	0.39	0.999941	0.180193	0.999948	0.985566	0.993799	0.997451	0.0777624	0.99731	0.999306	89.2	101.1	7.9	102.2	165.2	134.4	16.95	5.24	157.1	3.22	13.82	16.88	84	66.3	93.5	95.2	103.3	93.9	7.4
TVLPTVPESPEEEVK	1xPhospho [S9]	O75152	Zinc finger CCCH domain-containing protein 11A OS=Homo sapiens OX=9606 GN=ZC3H11A PE=1 SV=3	0.037	0.089	0.039	0.934	1.204	25.345	13.578	24.032	30.98	-4.76	-3.5	-4.69	-0.1	0.27	4.66	3.76	4.59	4.95	0.383699	0.38007	0.498112	0.99018	0.999637	0.705122	0.256958	0.820196	0.350618	181.7	6.7	16.1	7.1	169.7	218.8	23.23	157.69	120.77	159.06	73.66	19.62	176.1	109.8	159.6	2.5	5.9	132.3	61.4
LGASNSPGQPNSVKRK	1xDeamidated [N5]; 1xPhospho [S]	P49756	RNA-binding protein 25 OS=Homo sapiens OX=9606 GN=RBM25 PE=1 SV=3	0.925	0.089	0.041	0.079	0.17	0.086	1.899	1.95	4.169	-0.11	-3.48	-4.62	-3.66	-2.56	-3.54	0.93	0.96	2.06	0.999401	0.349368	0.0846546	0.51149	0.761415	0.347256	0.969038	0.799152	0.552906	260.4	240.9	23.3	10.6	20.7	44.2	12.78	83.22	149.67	99.77	134.14	110.26	160.8	135	174.4	148.8	535.9	135.3	159.7
TGGPAYGPSSDVSTASETESEKREEPNR	1xPhospho [S/T]; 1xDeamidated [N27]	P51116	RNA-binding protein FXR2 OS=Homo sapiens OX=9606 GN=FXR2 PE=1 SV=2	0.595	0.089	0.164	0.78	0.731	1.311	8.173	4.769	4.467	-0.75	-3.48	-2.61	-0.36	-0.45	0.39	3.03	2.25	2.16	0.996987	0.416807	0.563886	0.664719	0.99983	0.888668	0.55157	0.99997	0.706131	178.7	106.3	16	29.2	139.3	130.5	20.05	32.62	119.24	123.19	84.07	20.64	133.8	201.4	171.5	148.6	102	78.3	15.3
SFREPAPAEALPQQYPEPAPAALCGPPPRAPSR	1xDeamidated [Q14]; 1xCarbamidomethyl [C24]; 1xPhospho [S32]	Q8IU81	Interferon regulatory factor 2-binding protein 1 OS=Homo sapiens OX=9606 GN=IRF2BP1 PE=1 SV=1	0.033	0.09	0.876	0.892	0.712	27.105	7.948	1.018	0.812	-4.93	-3.48	-0.19	-0.17	-0.49	4.76	2.99	0.03	-0.3	0.422656	0.976056	0.990105	0.991045	0.999171	0.192894	0.887117	1	0.999856	166.6	5.5	14.9	145.9	148.5	118.6	77.66	164.97	120.14	12.89	12.16	9.9	11.2	158.4	156.3	159.1	0.1	5.1	14
QQSHFAMMHGGTGFAGIDSSSPEVK	1xOxidation [M]; 1xPhospho [S/T]	Q15365	Poly(rC)-binding protein 1 OS=Homo sapiens OX=9606 GN=PCBP1 PE=1 SV=2	0.8	0.09	0.901	0.88	0.44	1.1	4.907	0.976	0.489	-0.32	-3.48	-0.15	-0.18	-1.18	0.14	2.29	-0.03	-1.03	0.975517	0.000103145	0.999766	0.997834	0.136309	0.999588	0.00635229	0.999983	0.204877	145.9	116.7	13.1	131.5	128.4	64.3	10.68	6.22	84.04	12.52	5.54	25.33	141.5	136.6	166.1	123	113.1	109.1	4.2
ELVEPLTPSGEAPNQALLR	1xPhospho [T7]; 1xDeamidated [N14]	P00533	Epidermal growth factor receptor OS=Homo sapiens OX=9606 GN=EGFR PE=1 SV=2	0.116	0.09	0.107	0.114	0.109	0.985	1.213	1.066	1.016	-3.11	-3.48	-3.22	-3.13	-3.2	-0.02	0.28	0.09	0.02	0.972722	0.967004	0.958338	0.808011	0.982647	0.995007	0.999997	0.997758	0.999985	390.6	45.3	35.1	41.9	44.6	42.5	77.04	153.14	150.87	142.98	1.93	140.07	21.6	189.8	250.5	22	8.3	360.2	11.3
IAELEEEQSQGSTTNSDWMK	1xPhospho [S/T]	P46821	Microtubule-associated protein 1B OS=Homo sapiens OX=9606 GN=MAP1B PE=1 SV=2	0.127	0.09	0.176	0.167	0.148	1.31	1.645	0.95	0.843	-2.97	-3.47	-2.51	-2.58	-2.76	0.39	0.72	-0.07	-0.25	0.588128	0.187265	0.580163	0.860665	0.592067	0.994468	0.938806	0.99375	1	351.3	44.7	31.6	61.7	58.6	52	57.99	40.04	106.54	109.03	122.77	29.11	324.1	349.1	84	32.5	69.1	41.3	83.8
LITSFLELHCLESPTELSQSSDSEAGDPASQS	1xCarbamidomethyl [C10]; 1xPhospho [S]	Q9BQA9	Cytochrome b-245 chaperone 1 OS=Homo sapiens OX=9606 GN=CYBC1 PE=1 SV=1	0.046	0.09	0.085	0.083	0.093	1.78	1.032	0.967	1.089	-4.43	-3.47	-3.55	-3.6	-3.43	0.83	0.05	-0.05	0.12	0.348719	0.373591	0.511301	0.664722	0.480923	0.989942	0.999926	0.999752	1	429.4	19.9	38.7	36.7	35.4	39.9	86.39	32.13	60.28	58.8	17.43	51.95	691.9	13.3	519.8	24.1	22.4	39	46.8
EQFDTLTPEPPVDPNQEVPPGPPR	1xPhospho [T]	Q6PKG0	La-related protein 1 OS=Homo sapiens OX=9606 GN=LARP1 PE=1 SV=2	1.261	0.09	0.723	0.777	0.053	0.616	0.583	1.075	0.073	0.33	-3.47	-0.47	-0.36	-4.25	-0.7	-0.78	0.1	-3.78	0.966781	0.445442	0.999914	0.999749	0.373856	0.89356	0.999989	0.995774	0.280068	153.7	193.8	13.9	111.1	119.4	8.1	75.27	33.47	132.51	22.38	87.63	108.33	151.1	211.5	22.4	126.5	253.8	190.5	3.1
QSLVPAHPMAPPSPSTTSSNNNSSSSSNSGWDQLSK	1xPhospho [S/T]; 1xDeamidated [N]	P29558	RNA-binding motif, single-stranded-interacting protein 1 OS=Homo sapiens OX=9606 GN=RBMS1 PE=1 SV=3	0.043	0.09	0.093	0.07	0.066	1.606	0.732	0.753	0.716	-4.53	-3.47	-3.43	-3.84	-3.92	0.68	-0.45	-0.41	-0.48	0.954835	0.998556	0.883701	0.972083	0.998797	0.999999	1	0.999355	0.978644	440.5	19.1	39.8	40.7	30.7	29.2	83.44	157.9	121.39	63.89	158.97	149.74	270	6.6	260.9	240.8	11.3	3.8	173.2
MLAGDPGCSPGAEGNAPAPGAGGQALASDSEEADEVPEWLR	1xCarbamidomethyl [C8]; 1xDeamidated [Q24]; 1xPhospho [S]	Q9NQT8	Kinesin-like protein KIF13B OS=Homo sapiens OX=9606 GN=KIF13B PE=1 SV=2	0.888	0.09	1.08	0.115	0.802	0.129	8.866	0.106	0.743	-0.17	-3.47	0.11	-3.12	-0.32	-2.95	3.15	-3.23	-0.43	0.997266	0.986491	0.90841	0.99502	0.999921	0.925849	0.997996	0.666897	0.821386	150.9	134	13.7	163	17.3	121.1	87.17	77.38	17.11	9.97	135.12	86.2	1.7	215.7	171	151.8	197.8	16.3	12.8
EFFVTSAPWSVIDQQAIHPELNGATYR	1xPhospho [S/T]; 2xDeamidated [Q14; N/Q]	P56545	C-terminal-binding protein 2 OS=Homo sapiens OX=9606 GN=CTBP2 PE=1 SV=1	1.491	0.091	1.765	1.683	2.458	1.128	27.139	0.953	1.393	0.58	-3.46	0.82	0.75	1.3	0.17	4.76	-0.07	0.48	0.999873	0.410154	0.999433	0.999014	0.997998	0.999995	0.639081	1	0.97353	70.7	105.4	6.4	124.8	119	173.8	33.71	8.37	157.41	18.46	13.32	86.97	108.7	72.1	56.8	113.2	107.5	95.9	6.5
AEAPSSPDVAPAGKEDSPSASGR	1xPhospho [S]	Q9P1Y6	PHD and RING finger domain-containing protein 1 OS=Homo sapiens OX=9606 GN=PHRF1 PE=1 SV=3	1.202	0.091	1.292	0.936	0.8	0.779	8.817	0.725	0.619	0.27	-3.46	0.37	-0.09	-0.32	-0.36	3.14	-0.46	-0.69	1	0.155954	0.999977	0.995761	0.999995	0.998025	0.187894	0.984012	0.999655	112.8	135.6	10.2	145.7	105.6	90.2	52.48	33	146.59	40.9	74.26	55.83	186.9	66.9	100.3	66.6	132.7	120.6	9.1
GNAEGSSDEEGKLVIDEPAK	1xDeamidated [N2]; 1xPhospho [S7]	P51858	Hepatoma-derived growth factor OS=Homo sapiens OX=9606 GN=HDGF PE=1 SV=1	1.007	0.091	0.047	0.63	0.075	0.626	0.823	13.388	1.588	0.01	-3.46	-4.41	-0.67	-3.74	-0.68	-0.28	3.74	0.67	0.962087	0.383124	0.2035	0.9645	0.244876	1	0.999321	0.55853	0.999994	210.5	212	19.1	9.9	132.7	15.7	9.41	83.69	147.1	58.97	77.58	78.81	235.5	229.2	196.8	266.2	6.9	230.8	187.8
GSLQAHDTSSLPTVIMR	1xPhospho [S/T]	Q12802	A-kinase anchor protein 13 OS=Homo sapiens OX=9606 GN=AKAP13 PE=1 SV=2	1.736	0.091	0.136	0.096	0.198	0.055	2.177	0.704	1.451	0.8	-3.46	-2.88	-3.38	-2.34	-4.18	1.12	-0.51	0.54	0.998757	0.981804	0.899062	0.935374	0.982558	0.785113	1	0.999996	0.998939	184.2	319.8	16.7	25.1	17.7	36.4	81.1	87.96	157.12	58.88	74.43	48.96	196.3	8.4	191.6	8.4	332.7	476.3	325.8
APAPAPPGTVTQVDVR	1xPhospho [T9]	Q12929	Epidermal growth factor receptor kinase substrate 8 OS=Homo sapiens OX=9606 GN=EPS8 PE=1 SV=1	1.636	0.091	2.376	3.467	4.356	2.12	47.848	1.459	1.833	0.71	-3.46	1.25	1.79	2.12	1.08	5.58	0.55	0.87	0.472163	0.454211	0.212702	0.107009	0.0645888	0.893271	0.0027974	0.997262	0.970691	46.4	75.9	4.2	110.3	160.9	202.2	82.02	36.79	101.82	9.21	5.17	15.49	50.9	48	1.8	100.1	45.5	78.6	0.9
QKSEEPSVSIPFLQTALLR	1xDeamidated [Q1]; 1xPhospho [S3]	Q5SW79	Centrosomal protein of 170 kDa OS=Homo sapiens OX=9606 GN=CEP170 PE=1 SV=1	1.31	0.091	0.316	1.068	0.964	0.815	10.552	3.376	3.047	0.39	-3.45	-1.66	0.09	-0.05	-0.29	3.4	1.76	1.61	0.999891	0.230481	0.743513	0.991017	0.949396	0.999162	0.648266	0.962987	0.994754	126.3	165.5	11.5	40	134.9	121.8	21.64	73.41	77.52	94.84	72.1	73.05	141.3	166.8	107.1	256.1	30.4	185.1	43.4
NELRDSTEQFQEYYR	1xPhospho [S/T]	O94967	WD repeat-containing protein 47 OS=Homo sapiens OX=9606 GN=WDR47 PE=1 SV=1	0.107	0.091	0.43	0.333	0.391	3.102	4.277	0.774	0.91	-3.22	-3.45	-1.22	-1.59	-1.35	1.63	2.1	-0.37	-0.14	0.117887	0.052668	0.72774	0.446568	0.727391	0.928979	0.431194	0.995151	1	255	27.4	23.3	109.7	84.9	99.8	14.49	135.39	37.31	21.63	82.65	8.51	188.1	234.5	250.7	9.1	198.4	25.2	21
TPTSSPASSPLVAK	2xPhospho [S]	Q14684	Ribosomal RNA processing protein 1 homolog B OS=Homo sapiens OX=9606 GN=RRP1B PE=1 SV=3	1.129	0.092	1.813	1.952	3.625	1.73	39.568	1.077	2	0.17	-3.45	0.86	0.97	1.86	0.79	5.31	0.11	1	0.990812	0.0137101	0.53609	0.557117	0.0990345	0.863384	0.000146829	1	0.824454	62.4	70.5	5.7	113.2	121.9	226.3	40.53	4.96	117.73	41.93	10.9	5.34	61.6	71.5	29.5	69.5	63.7	69.6	26.6
YMAENPTAGVVQEEEEDNLEYDSDGNPIAPTK	1xPhospho [S/T/Y]	Q86XP3	ATP-dependent RNA helicase DDX42 OS=Homo sapiens OX=9606 GN=DDX42 PE=1 SV=1	1.101	0.092	0.006	0.511	1.052	0.464	11.472	89.82	184.949	0.14	-3.45	-7.46	-0.97	0.07	-1.11	3.52	6.49	7.53	0.982397	0.733005	0.139288	0.865074	0.999939	0.997067	0.835361	0.605756	0.190223	159.5	175.7	14.6	0.9	81.5	167.8	32.42	76.43	131.09	170.34	83.07	31.54	243.4	150	138.5	165.2	165.3	13.5	132.5
DKQSPSQANGCSDHRPIDILEMLSR	1xPhospho [S]; 1xDeamidated [N9]; 1xCarbamidomethyl [C11]	Q9NPI6	mRNA-decapping enzyme 1A OS=Homo sapiens OX=9606 GN=DCP1A PE=1 SV=3	0.084	0.092	0.507	0.046	0.066	0.547	0.713	0.091	0.129	-3.57	-3.44	-0.98	-4.44	-3.93	-0.87	-0.49	-3.46	-2.95	0.983128	0.948203	0.834415	0.477682	0.566441	0.838042	0.958546	0.984	0.995469	334.2	28.2	30.7	169.6	15.4	21.9	78.6	111.2	93.78	86.53	85.12	75.11	424.8	26.7	394	33.2	200.7	29.7	17.6
YHLDSSVGGPGPAAGPGGTRSPR	1xPhospho [T19]	Q6ZW31	Rho GTPase-activating protein SYDE1 OS=Homo sapiens OX=9606 GN=SYDE1 PE=1 SV=1	0.06	0.092	0.221	0.718	0.719	12.014	7.802	3.249	3.253	-4.06	-3.44	-2.18	-0.48	-0.48	3.59	2.96	1.7	1.7	0.989156	0.999978	0.99999	0.992738	0.911822	0.853191	0.848401	0.980072	0.85913	213.5	12.8	19.7	47.2	153.3	153.5	84.34	152.63	147.99	101.59	105.27	66.77	150.1	149.2	2.6	149.6	4	8.9	10
ADTSQEICSPRLPISASHSSK	1xCarbamidomethyl [C8]; 1xPhospho [S9]	P52948	Nuclear pore complex protein Nup98-Nup96 OS=Homo sapiens OX=9606 GN=NUP98 PE=1 SV=4	0.735	0.092	0.259	2.055	2.736	2.795	29.678	7.932	10.557	-0.44	-3.44	-1.95	1.04	1.45	1.48	4.89	2.99	3.4	0.973478	0.84619	0.998767	1	0.999823	0.97364	0.719534	0.998784	0.986709	87.2	64.2	8	22.6	179.3	238.6	142.99	79.26	170.74	159.22	56.6	57.67	386.1	39.5	11.9	4.3	29.1	45.9	429.8
TVAISDAAQLPHDYCTTPGGTLFSTTPGGTRIIYDRK	1xDeamidated [Q9]; 1xCarbamidomethyl [C15]; 2xPhospho [T21; T25]	Q13542	Eukaryotic translation initiation factor 4E-binding protein 2 OS=Homo sapiens OX=9606 GN=EIF4EBP2 PE=1 SV=1	0.251	0.092	0.116	0.109	0.165	0.434	1.785	0.943	1.426	-1.99	-3.44	-3.11	-3.2	-2.6	-1.2	0.84	-0.08	0.51	0.47807	0.250153	0.0522337	0.262938	0.236059	0.996539	1	0.900249	0.924911	346.1	86.9	32	40.1	37.8	57.1	100.01	46.39	63.49	90.72	41.44	71.58	837	74.6	274.2	76.8	27.1	68.9	25.4
GPSQEEEDNHSDEEDRASEPKSQDQDSEVNELSR	3xPhospho [S11; S18; S]	Q86VM9	Zinc finger CCCH domain-containing protein 18 OS=Homo sapiens OX=9606 GN=ZC3H18 PE=1 SV=2	0.117	0.093	1.073	1.026	0.079	8.783	0.851	0.956	0.074	-3.1	-3.43	0.1	0.04	-3.66	3.13	-0.23	-0.06	-3.76	0.864857	0.757996	0.999818	0.964421	0.750479	0.443159	1	0.895108	0.870901	177.1	20.7	16.4	190.1	181.7	14	78.78	43.17	125.18	85.2	8.22	100.12	206.9	206.6	12.8	12.3	31.8	24.1	2.4
TDSVIIADQTPTPTR	1xPhospho [T12]	P17544	Cyclic AMP-dependent transcription factor ATF-7 OS=Homo sapiens OX=9606 GN=ATF7 PE=1 SV=3	0.999	0.093	1.408	1.544	1.626	1.546	17.498	1.096	1.154	0	-3.43	0.49	0.63	0.7	0.63	4.13	0.13	0.21	0.999986	0.0367844	0.99603	0.981153	0.913901	0.956463	0.00700966	0.999945	0.994948	90	89.8	8.4	126.7	138.9	146.3	20.85	6.65	133.18	8.6	10.25	16.15	79.1	114.9	84.2	84.1	91.6	80.5	7.7
GSSPGIQDTLEAEDGAFETDEAPEDR	1xPhospho [S/T]	Q9UNX4	WD repeat-containing protein 3 OS=Homo sapiens OX=9606 GN=WDR3 PE=1 SV=1	0.564	0.093	0.704	0.284	0.924	0.505	9.944	0.404	1.313	-0.83	-3.43	-0.51	-1.81	-0.11	-0.99	3.31	-1.31	0.39	0.545867	0.206688	0.999534	0.830562	0.999875	0.994167	0.289104	0.941841	1	168.1	94.7	15.6	118.3	47.8	155.4	38.01	103.53	60.91	32.93	127.19	11.8	249.4	130.5	140.6	178.7	79.3	0.6	3.1
EGHSLEMENENLVENGADSDEDDNSFLK	1xOxidation [M7]; 1xPhospho [S19]	Q9UHB6	LIM domain and actin-binding protein 1 OS=Homo sapiens OX=9606 GN=LIMA1 PE=1 SV=1	0.243	0.094	1.156	1.113	0.725	4.577	7.723	0.963	0.627	-2.04	-3.41	0.21	0.16	-0.46	2.19	2.95	-0.05	-0.67	0.355717	0.0963184	0.999995	1	0.896915	0.335991	0.432518	1	0.848741	138.5	33.7	13	160.1	154.3	100.4	16.92	104.95	117.66	10.74	13.34	76.65	163.2	133.2	117.3	9.1	110.8	32.4	67.8
AERSPNQGK	1xPhospho [S4]	Q9P2E9	Ribosome-binding protein 1 OS=Homo sapiens OX=9606 GN=RRBP1 PE=1 SV=5	1.755	0.094	1.598	1.521	1.308	0.866	13.924	0.952	0.818	0.81	-3.41	0.68	0.6	0.39	-0.21	3.8	-0.07	-0.29	0.927784	0.87465	0.945008	0.968482	0.977601	0.999969	0.500107	0.999997	0.999973	82.5	144.8	7.7	131.8	125.4	107.9	139.12	31.67	146.34	52.58	22.77	26.2	62.6	2.7	414.8	79.4	110	151	88.9
GTDDLNPVTSTPAKPSSPPPEFSFNTPGK	1xDeamidated [N6]; 1xPhospho [S]	Q6NXT4	Zinc transporter 6 OS=Homo sapiens OX=9606 GN=SLC30A6 PE=1 SV=2	0.975	0.094	1.262	1.689	1.954	1.732	20.737	1.338	1.548	-0.04	-3.41	0.34	0.76	0.97	0.79	4.37	0.42	0.63	0.999961	0.118261	0.986683	0.902794	0.816609	0.955048	0.0153124	0.998466	0.989057	86	83.9	8.1	108.6	145.3	168.1	26.63	27.62	144.31	13.37	6.51	6.79	98.7	79.9	56.9	68.7	78	114.2	101.1
SPQTLAPVGEDAMKTPSPAAEDAREPEAK	1xDeamidated [Q3]; 2xPhospho [T4; S17]	Q92797	Symplekin OS=Homo sapiens OX=9606 GN=SYMPK PE=1 SV=2	0.179	0.094	0.072	1.069	0.139	5.96	1.471	14.78	1.919	-2.48	-3.41	-3.79	0.1	-2.85	2.58	0.56	3.89	0.94	0.798809	0.200692	0.198641	0.962744	0.586672	0.996552	0.952439	0.554582	0.950869	234.9	42.1	22.2	17	251.2	32.6	2.25	108.51	87.32	96.19	83.86	137.64	218.8	212.1	209.5	38.1	22.3	180.4	40.3
LHGGFDSDCSEDGEALNGEPELDLTSK	2xPhospho [S7; S10]; 1xCarbamidomethyl [C9]; 1xDeamidated [N17]	O00178	GTP-binding protein 1 OS=Homo sapiens OX=9606 GN=GTPBP1 PE=1 SV=3	0.067	0.094	0.083	0.027	0.086	0.399	0.912	0.325	1.039	-3.89	-3.4	-3.59	-5.22	-3.54	-1.33	-0.13	-1.62	0.06	0.0441764	0.111265	0.325871	0.0298177	0.250748	0.999877	0.993598	0.661864	0.999956	441.9	29.8	41.7	36.6	11.9	38.1	73.04	71.71	66.63	135.87	90.11	81.27	664.3	107.7	371.5	4.4	25	33.8	35.1
TPMYGSQTPLQDGSRTPHYGSQTPLHDGSR	1xDeamidated [Q]; 1xPhospho [S/T]	O00267	Transcription elongation factor SPT5 OS=Homo sapiens OX=9606 GN=SUPT5H PE=1 SV=1	0.362	0.095	0.947	0.371	0.245	1.024	2.58	0.392	0.258	-1.46	-3.4	-0.08	-1.43	-2.03	0.03	1.37	-1.35	-1.95	0.89481	0.689788	1	0.950566	0.852732	0.999958	0.999428	0.948226	0.848391	198.7	72	18.8	188.1	73.7	48.6	79.23	78.58	46.91	75.86	97.46	69.8	21.1	245.7	315.3	89.5	5.7	89.1	12.8
SVFTSSLFQMEPSPR	1xPhospho [S13]	Q2M1Z3	Rho GTPase-activating protein 31 OS=Homo sapiens OX=9606 GN=ARHGAP31 PE=1 SV=2	0.882	0.095	0.106	0.703	0.187	0.797	1.968	6.609	1.755	-0.18	-3.4	-3.23	-0.51	-2.42	-0.33	0.98	2.72	0.81	0.949785	0.351615	0.549476	0.999999	0.977676	0.965965	0.73371	0.505709	0.907093	201.8	178	19.1	21.5	141.9	37.7	85.16	7.88	64.65	31.32	72	92.86	305.9	213.8	11.3	166.6	188.6	193.7	20.3
MPPLIADSPK	1xPhospho [S8]	P54646	5'-AMP-activated protein kinase catalytic subunit alpha-2 OS=Homo sapiens OX=9606 GN=PRKAA2 PE=1 SV=2	0.995	0.095	1.048	0.969	0.348	0.974	3.668	0.925	0.332	-0.01	-3.4	0.07	-0.05	-1.52	-0.04	1.87	-0.11	-1.59	0.998361	0.19434	0.876424	0.997588	0.96898	1	0.526895	0.65855	0.999357	134.7	134	12.8	141.1	130.5	46.9	59.03	8.98	52.13	84.94	9.65	15.41	177	154.3	40.5	153.6	133.9	159.4	14.6
SVHISTPEKEPCAPLTIPSIR	1xPhospho [S/T]; 1xCarbamidomethyl [C12]	P28290	Protein ITPRID2 OS=Homo sapiens OX=9606 GN=ITPRID2 PE=1 SV=3	0.6	0.095	1.185	0.297	1.22	0.495	12.846	0.251	1.029	-0.74	-3.4	0.24	-1.75	0.29	-1.01	3.68	-2	0.04	1	0.939411	1	0.969507	0.942056	0.974957	1	0.956105	0.922336	136.4	81.9	13	161.7	40.6	166.4	77.41	58.76	158.37	68.12	21.55	86.24	221.2	113.8	32.3	62.9	68.3	166.4	10.8
GVKPVFSIGDEEEYDTDEIDSSSMSDDDRK	1xPhospho [T16]	Q9NUY8	TBC1 domain family member 23 OS=Homo sapiens OX=9606 GN=TBC1D23 PE=1 SV=3	0.222	0.095	0.126	0.691	0.185	3.111	1.948	5.484	1.469	-2.17	-3.4	-2.99	-0.53	-2.43	1.64	0.96	2.46	0.55	0.171303	0.112303	0.0153683	0.93039	0.0659543	0.575917	0.999371	0.0736266	0.947892	258.6	57.5	24.6	32.6	178.8	47.9	62.57	73.48	129.3	77.36	46.07	24.49	181	181.8	489.1	95.9	40.4	21.5	17.3
FAGGLHFSGPKVEGGVK	1xPhospho [S8]	Q09666	Neuroblast differentiation-associated protein AHNAK OS=Homo sapiens OX=9606 GN=AHNAK PE=1 SV=2	1.633	0.095	0.7	1.391	0.904	0.852	9.489	1.986	1.291	0.71	-3.39	-0.51	0.48	-0.15	-0.23	3.25	0.99	0.37	0.88033	0.157201	0.992258	1	0.955291	0.888256	0.489016	0.990864	0.99971	104.8	171.2	10	73.4	145.8	94.8	53.88	67.78	122.83	31.84	58.89	84.41	94.3	150	45.8	154	444	149.2	9
AQCETLSPDGLPEEQPQTTK	1xDeamidated [Q]; 1xCarbamidomethyl [C3]; 1xPhospho [S/T]	Q7Z6Z7	E3 ubiquitin-protein ligase HUWE1 OS=Homo sapiens OX=9606 GN=HUWE1 PE=1 SV=3	0.015	0.096	0.956	0.912	1.001	59.867	10.474	0.953	1.047	-6.04	-3.39	-0.06	-0.13	0	5.9	3.39	-0.07	0.07	0.390258	0.878866	0.879271	1	1	0.375752	0.849285	0.867175	0.849737	150.8	2.3	14.4	144.2	137.5	150.9	5.01	169.08	142.12	94.17	23.72	27.91	128.6	117	126.7	1.9	133	0.2	4.7
SISVGENLGLVAEPQAHAPIR	1xPhospho [S3]	O60336	Mitogen-activated protein kinase-binding protein 1 OS=Homo sapiens OX=9606 GN=MAPKBP1 PE=1 SV=4	0.212	0.096	1.474	0.089	1.154	0.418	12.037	0.06	0.783	-2.24	-3.38	0.56	-3.5	0.21	-1.26	3.59	-4.06	-0.35	0.928911	0.939125	0.983001	0.57379	0.998851	0.973865	0.993686	0.253875	0.89829	149.1	31.6	14.3	219.8	13.2	172.1	67.88	145.53	150.6	11.79	99.01	84.08	171.2	27.3	127.7	2.4	240.8	27.1	12.2
RFSDGAASIQAFK	1xPhospho [S3]	Q9Y2K2	Serine/threonine-protein kinase SIK3 OS=Homo sapiens OX=9606 GN=SIK3 PE=1 SV=4	0.071	0.097	0.087	0.496	1.044	7.028	10.81	5.709	12.003	-3.82	-3.37	-3.52	-1.01	0.06	2.81	3.43	2.51	3.59	0.758521	0.718471	0.349541	0.925758	0.982775	0.998453	0.970903	0.851686	0.708605	214.7	15.2	20.7	18.7	106.6	224.1	18.9	143.68	132.5	148.74	80.59	80.72	179.9	184.2	248.9	13	177.8	9.8	7
SPQPPAEEDEDDFDDTLVAIDTYNCDLHFK	1xPhospho [S/T]; 1xDeamidated [N/Q]; 1xCarbamidomethyl [C25]	Q9BUJ2	Heterogeneous nuclear ribonucleoprotein U-like protein 1 OS=Homo sapiens OX=9606 GN=HNRNPUL1 PE=1 SV=2	0.17	0.097	0.116	0.254	0.096	1.497	0.988	2.194	0.826	-2.56	-3.37	-3.11	-1.98	-3.39	0.58	-0.02	1.13	-0.28	0.959878	0.790506	0.876236	0.948269	0.278308	1	0.913575	0.999894	0.839839	346.5	58.8	33.5	40.1	88	33.1	77.3	112.33	130.79	118.56	12.78	60.04	360.1	269.3	30.8	31.1	249.9	45.7	224.4
AKTQTPPVSPAPQPTEERLPSSPVYEDAASFK	3xPhospho [T5; T15; T/Y]; 1xDeamidated [Q13]	Q14247	Src substrate cortactin OS=Homo sapiens OX=9606 GN=CTTN PE=1 SV=2	0.468	0.097	15.029	0.457	0.565	0.976	5.839	0.03	0.038	-1.09	-3.37	3.91	-1.13	-0.82	-0.04	2.55	-5.04	-4.73	0.999706	0.127016	0.966835	0.911576	0.882002	0.976437	0.548162	0.518042	0.472855	34.1	16	3.3	511.9	15.6	19.3	159.45	166.34	88.92	107.25	109.83	39.78	423.4	9.4	14.3	6.7	452.4	5.6	2.4
TRPASQPTPFALHHAASCEVDPSSGDSISLAR	1xPhospho [S/T]; 1xCarbamidomethyl [C18]	Q5T5Y3	Calmodulin-regulated spectrin-associated protein 1 OS=Homo sapiens OX=9606 GN=CAMSAP1 PE=1 SV=2	0.116	0.097	0.217	0.182	0.158	1.568	1.63	0.837	0.729	-3.11	-3.37	-2.2	-2.46	-2.66	0.65	0.71	-0.26	-0.46	0.0671638	0.117666	0.811238	0.253671	0.274527	0.95155	0.991837	0.874401	0.895755	339.1	39.3	32.9	73.6	61.6	53.6	55.66	88.84	67.23	64.1	54.53	47.76	103.3	373.5	388.7	82.9	43.3	5.1	15.3
AAGGIILTASHCPGGPGGEFGVK	1xPhospho [S/T]; 1xCarbamidomethyl [C12]	Q15124	Phosphoglucomutase-like protein 5 OS=Homo sapiens OX=9606 GN=PGM5 PE=1 SV=2	0.017	0.097	0.093	0.033	0.002	1.917	0.018	0.35	0.018	-5.88	-3.37	-3.43	-4.94	-9.19	0.94	-5.83	-1.52	-5.77	0.420051	0.996315	0.998289	0.921587	0.0487465	0.912857	0.106213	0.991941	0.0946933	483.4	8.2	46.9	45	15.7	0.8	91.86	93.04	115.08	132.24	151.88	141.19	570.8	5.1	356.9	6.1	19.5	2.9	22
LDSPPPSPITEASEAAEAAEAGNLAVSSR	1xPhospho [S]	Q9C0C2	182 kDa tankyrase-1-binding protein OS=Homo sapiens OX=9606 GN=TNKS1BP1 PE=1 SV=4	0.59	0.097	0.062	0.014	0.01	0.024	0.106	0.228	0.166	-0.76	-3.36	-4	-6.13	-6.6	-5.37	-3.23	-2.13	-2.59	0.999253	0.413061	0.506295	0.0941947	0.0403305	0.160963	0.658074	0.834844	0.557223	338.3	199.5	32.9	21.1	4.8	3.5	39.62	40.09	20.2	143.21	162.85	146.77	368.5	262.7	159.6	258.6	154.9	121.5	22.3
NLIDSMDQSAFAGFSFVNPK	1xDeamidated [Q8]; 1xPhospho [S15]	Q05655	Protein kinase C delta type OS=Homo sapiens OX=9606 GN=PRKCD PE=1 SV=2	0.18	0.097	0.107	0.091	0.036	0.508	0.374	0.855	0.342	-2.48	-3.36	-3.23	-3.45	-4.78	-0.98	-1.42	-0.23	-1.55	0.962945	0.838844	0.997398	0.980365	0.915608	0.999997	0.999946	0.999841	0.993065	396.9	71.3	38.7	42.4	36.2	14.5	86.79	81.63	86.75	51.94	49.74	104.22	579.5	484.4	3.5	87.1	4.3	101.3	71
LSNPQIEWQNSTIDSEDGEQFDNMTDGVAEPMHGSLAGVK	2xDeamidated [N/Q]; 1xPhospho [S15]	Q9H2P0	Activity-dependent neuroprotector homeobox protein OS=Homo sapiens OX=9606 GN=ADNP PE=1 SV=1	0.049	0.098	0.036	0.041	0.036	0.837	0.366	1.135	0.98	-4.34	-3.35	-4.78	-4.59	-4.81	-0.26	-1.45	0.18	-0.03	0.642167	0.450476	0.313597	0.648085	0.31778	1	0.999714	0.98544	1	475.8	23.5	46.5	17.4	19.7	17	9.87	154.35	153.12	66.69	157.99	59.14	266.9	279.5	230.3	13.2	7.2	260.2	26.1
VTDALPEPEPPGAMAASEDEEEEEEALEAMQSR	1xPhospho [S17]; 1xDeamidated [Q31]	Q9Y3E7	Charged multivesicular body protein 3 OS=Homo sapiens OX=9606 GN=CHMP3 PE=1 SV=3	0.06	0.098	0.127	0.127	0.107	2.114	1.094	0.998	0.843	-4.06	-3.35	-2.98	-2.98	-3.22	1.08	0.13	0	-0.25	0.102576	0.907853	0.272543	0.458014	0.367939	0.89335	0.89048	0.998253	0.9999	395.1	23.7	38.7	50.2	50.1	42.3	94.53	84.01	156.56	52.73	18.72	10.85	242.5	557.7	35	14.5	3.4	30.3	19.8
LSLTSDPEEGDPLALGPESPGEPQPPQLK	1xPhospho [S/T]; 1xDeamidated [Q24]	Q5T1M5	FK506-binding protein 15 OS=Homo sapiens OX=9606 GN=FKBP15 PE=1 SV=2	0.077	0.098	0.024	0.065	0.028	0.845	0.286	2.725	1.165	-3.69	-3.35	-5.38	-3.93	-5.16	-0.24	-1.81	1.45	0.22	0.458502	0.876446	0.45022	0.333082	0.253305	0.999802	0.808255	0.999855	0.997351	464.1	35.9	45.5	11.1	30.3	13	14.04	153.23	150.22	168.14	58.03	65.96	281.6	224.8	220.7	216.3	1	17.4	22
MCDFGISGYLVDSVAK	1xCarbamidomethyl [C2]; 1xPhospho [S13]	P46734	Dual specificity mitogen-activated protein kinase kinase 3 OS=Homo sapiens OX=9606 GN=MAP2K3 PE=1 SV=2	0.127	0.098	0.205	0.116	0.951	0.913	9.676	0.566	4.641	-2.98	-3.35	-2.29	-3.11	-0.07	-0.13	3.27	-0.82	2.21	0.650727	0.647377	0.839872	0.538667	0.997273	0.999948	0.873181	0.992271	0.973731	240.3	30.5	23.6	49.2	27.9	228.5	70.31	126.27	59.81	118.68	51.03	82.92	326.9	46.7	236.9	6.3	159.7	30.1	22
RISSSSVQPCSEEVSTPQDSLAQCK	1xPhospho [S3]; 1xDeamidated [Q]; 2xCarbamidomethyl [C10; C24]	P42694	Probable helicase with zinc finger domain OS=Homo sapiens OX=9606 GN=HELZ PE=1 SV=2	1.026	0.098	0.133	0.083	1.157	0.081	11.754	0.624	8.718	0.04	-3.34	-2.91	-3.59	0.21	-3.63	3.56	-0.68	3.12	1	0.734289	0.906663	0.943891	0.999999	0.931248	0.68287	0.999994	0.872216	171.6	176.1	16.9	22.8	14.2	198.5	76.37	73.9	43.26	137.79	148.67	76.64	16.9	208.8	186	201	20.3	190.8	18.3
LSNPQIEWQNSTIDSEDGEQFDNMTDGVAEPMHGSLAGVK	1xDeamidated [N/Q]; 1xPhospho [S15]	Q9H2P0	Activity-dependent neuroprotector homeobox protein OS=Homo sapiens OX=9606 GN=ADNP PE=1 SV=1	1.493	0.099	1.118	1.19	0.069	0.797	0.697	1.064	0.061	0.58	-3.34	0.16	0.25	-3.86	-0.33	-0.52	0.09	-4.02	0.990517	0.594172	0.994757	0.999772	0.509313	0.999458	0.999986	0.966847	0.793366	120.8	180.3	11.9	135	143.7	8.3	39.27	2.55	140.15	78.96	18.69	150.15	60.1	141	112.6	165.9	174.2	168.1	11.1
EAENQGLDISSPGMSGHR	1xPhospho [S]	Q15545	Transcription initiation factor TFIID subunit 7 OS=Homo sapiens OX=9606 GN=TAF7 PE=1 SV=1	1.111	0.099	0.812	0.745	1.039	0.67	10.452	0.917	1.279	0.15	-3.33	-0.3	-0.43	0.05	-0.58	3.39	-0.13	0.36	0.986054	0.891521	0.947542	0.997215	0.993775	0.999958	0.625177	0.773659	0.728777	124.8	138.7	12.4	101.4	93	129.7	72.58	24.64	137.71	86.48	22.22	24.55	143.2	133	16	169.7	147.8	102.1	13.2
FSEMMNNMGGDEDVDLPEVDGADDDSQDSDDEKMPDLE	2xOxidation [M]; 1xDeamidated [N/Q]; 2xPhospho [S26; S]	Q15185	Prostaglandin E synthase 3 OS=Homo sapiens OX=9606 GN=PTGES3 PE=1 SV=1	0.215	0.1	0.333	0.268	2.006	1.247	20.067	0.803	6.018	-2.22	-3.32	-1.58	-1.9	1	0.32	4.33	-0.32	2.59	0.920181	0.22203	0.25531	0.912006	1	1	0.229565	0.761366	0.263717	153	32.9	15.3	51	41	306.9	30.48	116.21	78.09	84.13	134.22	67.22	217	132.9	131.7	198.5	28.5	27.2	13.3
WSAEASGKPSPSDPGSGTATMMNSSSR	1xPhospho [S]	Q5JRA6	Transport and Golgi organization protein 1 homolog OS=Homo sapiens OX=9606 GN=MIA3 PE=1 SV=1	1.05	0.1	1.027	0.8	0.093	0.762	0.927	0.779	0.09	0.07	-3.32	0.04	-0.32	-3.43	-0.39	-0.11	-0.36	-3.47	0.998951	0.402157	0.999448	1	0.194615	0.999566	0.993916	0.999803	0.119022	147.4	154.8	14.7	151.4	117.9	13.7	34.28	16.05	116.22	6.9	12.7	144.84	138	137.1	69.4	144	169.6	122.9	13.7
GRSSESSCGVDGDYEDAELNPR	1xPhospho [S/Y]; 1xCarbamidomethyl [C8]	P11274	Breakpoint cluster region protein OS=Homo sapiens OX=9606 GN=BCR PE=1 SV=2	0.671	0.1	0.106	0.096	0.116	0.144	1.156	0.907	1.09	-0.58	-3.32	-3.24	-3.38	-3.11	-2.8	0.21	-0.14	0.12	0.990261	0.00905234	0.0826169	0.00231323	0.00527159	0.00596411	0.999366	0.324648	0.588129	287.2	192.6	28.8	30.5	27.7	33.2	28.02	14.89	35.4	117.28	51.84	36.39	174.2	312.2	268.1	160	214.3	179.8	20.9
MAESPCSPSGQQPPSPPSPDELPANVK	1xCarbamidomethyl [C6]; 1xPhospho [S]	Q14160	Protein scribble homolog OS=Homo sapiens OX=9606 GN=SCRIB PE=1 SV=5	0.984	0.101	0.701	0.869	0.228	0.884	2.266	1.239	0.325	-0.02	-3.31	-0.51	-0.2	-2.13	-0.18	1.18	0.31	-1.62	1	0.1841	0.967973	0.702129	0.278886	0.720857	0.99967	0.981379	0.672748	154.5	152	15.6	108.4	134.3	35.2	24.76	23.55	15.67	84.22	87.04	68.57	134.7	156.8	215.7	154.3	130.5	205.8	17.7
TLSVAAAFNEDEDSEPEEMPPEAK	1xPhospho [S]; 1xOxidation [M19]	Q8WW12	PEST proteolytic signal-containing nuclear protein OS=Homo sapiens OX=9606 GN=PCNP PE=1 SV=2	0.063	0.101	0.275	0.232	0.355	3.688	3.527	0.846	1.294	-3.99	-3.31	-1.87	-2.11	-1.49	1.88	1.82	-0.24	0.37	0.319974	0.119928	0.772487	0.960268	0.989412	0.751225	0.292323	0.994979	0.975721	296.2	18.7	29.8	81.3	68.8	105.2	45.05	68.75	105.74	44.9	118.12	109.22	258.6	95.8	241.4	15.2	44.3	14.6	24.3
SLMSSPEDLTKDFEELKAEEVDVTK	1xPhospho [S]	P46821	Microtubule-associated protein 1B OS=Homo sapiens OX=9606 GN=MAP1B PE=1 SV=2	0.098	0.101	0.125	0.173	0.11	1.76	1.088	1.388	0.88	-3.35	-3.31	-3	-2.53	-3.19	0.82	0.12	0.47	-0.18	0.597103	0.567466	0.903716	0.787943	0.74704	0.999182	0.999445	0.999758	0.999158	373.5	36.7	37.6	46.5	64.6	41	90	62.73	142.19	135.29	55.43	12.68	567.7	308.9	26.2	43.9	9.2	30.4	31.1
GTDDLNPVTSTPAKPSSPPPEFSFNTPGK	2xDeamidated [N6; N25]; 1xPhospho [S]	Q6NXT4	Zinc transporter 6 OS=Homo sapiens OX=9606 GN=SLC30A6 PE=1 SV=2	1.179	0.101	1.103	1.471	1.699	1.248	16.848	1.333	1.54	0.24	-3.31	0.14	0.56	0.76	0.32	4.07	0.41	0.62	0.999928	0.0745699	0.998616	0.946889	0.849312	0.983207	0.0107108	0.995815	0.967543	91.6	107.9	9.2	101	134.7	155.5	34.51	40.09	133.34	27.61	26.46	41.28	115.3	58	79	58.6	93.1	135.1	77
RPASMAVMEGDLVK	1xPhospho [S4]	Q68EM7	Rho GTPase-activating protein 17 OS=Homo sapiens OX=9606 GN=ARHGAP17 PE=1 SV=1	0.513	0.101	0.234	0.338	0.809	0.659	8.014	1.444	3.454	-0.96	-3.31	-2.09	-1.56	-0.31	-0.6	3	0.53	1.79	0.999981	0.962437	0.999978	0.999859	0.999997	0.998329	0.979526	0.998218	1	200.3	102.8	20.2	46.9	67.7	162	83.16	78.59	108.51	138.23	104.91	82.76	208.5	6.3	180.7	130	92.7	10.6	7.7
TASETRSEGSEYEEIPKR	2xPhospho [S7; S]	P48634	Protein PRRC2A OS=Homo sapiens OX=9606 GN=PRRC2A PE=1 SV=3	0.198	0.101	0.341	1.549	1.102	7.813	10.87	4.544	3.234	-2.33	-3.3	-1.55	0.63	0.14	2.97	3.44	2.18	1.69	0.864213	0.423988	0.999829	0.763975	0.999796	0.213636	0.304046	0.62483	0.994834	139.8	27.7	14.2	47.7	216.5	154.1	78.17	51.89	85.13	115.12	4.18	70.29	133.5	190.9	16.6	22.2	55.2	26.5	8.6
SSLPLDHGSPAQENPESEKSSPAVSR	1xDeamidated [N/Q]; 1xPhospho [S]	Q5VZ89	DENN domain-containing protein 4C OS=Homo sapiens OX=9606 GN=DENND4C PE=1 SV=3	1.044	0.101	0.315	0.346	0.291	0.332	2.867	1.098	0.922	0.06	-3.3	-1.66	-1.53	-1.78	-1.59	1.52	0.13	-0.12	0.998452	0.376067	0.674661	0.93107	0.794338	0.993376	0.967884	0.991723	0.999904	193.7	202.2	19.7	61.1	67.1	56.3	67.99	74.48	64.84	100.91	15.2	39.26	219.6	307	50	23.2	229.2	241.7	22.3
RASWASENGETDAEGTQMTPAK	2xPhospho [S3; S6]	Q12789	General transcription factor 3C polypeptide 1 OS=Homo sapiens OX=9606 GN=GTF3C1 PE=1 SV=4	0.171	0.102	0.257	0.081	0.027	0.472	0.265	0.315	0.105	-2.55	-3.3	-1.96	-3.63	-5.22	-1.08	-1.92	-1.67	-3.25	0.384821	0.178676	0.855291	0.200003	0.0192098	0.9963	0.750391	0.751609	0.127879	366.5	62.7	37.2	94.1	29.6	9.9	67.74	35.15	46.02	91.67	98.22	92.29	426.4	388.3	64.9	69.3	33.6	66.4	39.4
SSRGQEEISGALPVASPASSR	1xPhospho [S]	Q9UBK8	Methionine synthase reductase OS=Homo sapiens OX=9606 GN=MTRR PE=1 SV=4	0.955	0.102	1.073	0.108	0.084	0.113	0.826	0.101	0.078	-0.07	-3.3	0.1	-3.21	-3.58	-3.14	-0.28	-3.31	-3.68	0.998203	0.978306	0.996571	0.966909	0.977423	0.998865	1	0.999515	0.999853	180.6	172.5	18.3	193.8	19.6	15.2	77.13	83.93	127.11	85.95	134.79	128.07	232.8	189.4	18.5	180.9	188.6	3.9	12.7
ASALLFSSDEEDQWNIPASQTHLASDSR	2xPhospho [S7; S8]; 1xDeamidated [N/Q]	Q9Y4E1; Q641Q2	WASH complex subunit 2C OS=Homo sapiens OX=9606 GN=WASHC2C PE=1 SV=5 WASH complex subunit 2A OS=Homo sapiens OX=9606 GN=WASHC2A PE=1 SV=3	0.093	0.102	0.115	1.035	0.063	11.131	0.625	9.028	0.554	-3.43	-3.3	-3.12	0.05	-3.98	3.48	-0.68	3.17	-0.85	0.955795	1	0.999988	0.996772	0.992567	0.784951	0.989525	0.999476	0.978952	249.2	23.2	25.3	28.6	257.9	15.8	86.37	150.68	126.72	132.94	78.02	35.61	1.4	251.1	220.7	212.9	20.5	0.2	22.4
GTFSDQELDAQSLDDEDDNMHHAVYPAVNR	2xPhospho [S12; S/T]; 1xDeamidated [N/Q]	Q9P270	SLAIN motif-containing protein 2 OS=Homo sapiens OX=9606 GN=SLAIN2 PE=1 SV=2	0.762	0.102	0.911	0.567	0.571	0.744	5.619	0.622	0.626	-0.39	-3.3	-0.13	-0.82	-0.81	-0.43	2.49	-0.69	-0.67	0.999948	0.941877	0.944572	1	1	0.999989	0.932197	0.95682	0.953069	153.4	116.8	15.6	139.8	86.9	87.6	85.4	69.37	119.69	12.28	67.38	59.75	228.5	159.2	8.1	166	24.8	121.3	16.2
NYSEVIEVDESDVEEDIFPTTSK	1xDeamidated [N1]; 1xPhospho [S/Y]	P49959	Double-strand break repair protein MRE11 OS=Homo sapiens OX=9606 GN=MRE11 PE=1 SV=3	0.063	0.102	0.059	0.032	0.13	0.502	1.279	0.534	2.193	-3.99	-3.3	-4.08	-4.98	-2.94	-1	0.35	-0.91	1.13	0.519114	0.906767	0.479122	0.366705	0.789636	0.999617	0.999732	0.999905	0.992107	433.1	27.3	44	25.7	13.7	56.3	85.58	51.97	135.67	91.14	112.21	39.7	570.5	413.3	16.7	26	15.7	45.5	42
SPVGKSPPSTGSTYGSSQKEESAASGGAAYTKR	1xPhospho [S6]	Q9Y2W1	Thyroid hormone receptor-associated protein 3 OS=Homo sapiens OX=9606 GN=THRAP3 PE=1 SV=2	0.135	0.102	0.504	0.239	0.348	1.778	3.421	0.475	0.691	-2.89	-3.3	-0.99	-2.06	-1.52	0.83	1.77	-1.08	-0.53	0.926814	0.826811	0.99979	1	0.999999	0.919593	0.862744	0.999868	0.999213	257.8	34.7	26.2	129.9	61.6	89.8	82.96	29.48	144.92	58.07	71.27	61.59	248.3	8.2	275.1	19.6	33.4	35.8	25.3
AEGPLDSPSEGHSYQNSGLDHFQNSNIDQSFWETFGSAEPTK	1xPhospho [S]; 2xDeamidated [N/Q]	Q8N6T3	ADP-ribosylation factor GTPase-activating protein 1 OS=Homo sapiens OX=9606 GN=ARFGAP1 PE=1 SV=2	0.072	0.102	2.113	0.11	2.035	1.523	19.963	0.052	0.963	-3.8	-3.29	1.08	-3.19	1.03	0.61	4.32	-4.27	-0.05	0.910694	0.855802	0.999985	0.983258	0.998644	0.999274	0.658196	0.994902	0.993429	110.5	8	11.3	233.4	12.1	224.8	89.93	17.03	69.55	87.1	161.81	81.98	197.3	119.4	5.3	10.2	8.6	7.3	13.4
TLSADASVNTLPVVVSR	1xPhospho [S3]	Q92615	La-related protein 4B OS=Homo sapiens OX=9606 GN=LARP4B PE=1 SV=3	0.105	0.102	0.037	0.084	2.527	0.804	24.748	2.26	67.668	-3.25	-3.29	-4.74	-3.57	1.34	-0.31	4.63	1.18	6.08	0.999873	0.966733	0.975605	0.999878	0.998781	1	0.998297	0.99575	0.99916	155.6	16.3	15.9	5.8	13.1	393.2	108.44	162	23.67	169.03	164.53	88.52	84.8	232.7	3.7	317.8	8.9	5.4	8.7
DMPGGFLFEGLSDDEDDFHPNTR	1xOxidation [M2]; 1xPhospho [S12]	Q96S82	Ubiquitin-like protein 7 OS=Homo sapiens OX=9606 GN=UBL7 PE=1 SV=2	0.45	0.102	0.391	0.633	0.394	1.406	3.85	1.618	1.007	-1.15	-3.29	-1.35	-0.66	-1.35	0.49	1.94	0.69	0.01	0.618116	0.141898	0.668637	0.8375	0.941422	0.998095	0.484989	0.999402	0.987984	202.1	90.9	20.7	79	127.8	79.5	99.85	47.42	138.33	35.12	26.18	144.33	484.5	88.7	102.1	66.7	23.6	45.9	10.4
IETIAASSTPTPIRK	1xPhospho [S/T]	Q96P47	Arf-GAP with GTPase, ANK repeat and PH domain-containing protein 3 OS=Homo sapiens OX=9606 GN=AGAP3 PE=1 SV=2	1.728	0.102	0.17	1.171	0.265	0.678	2.593	6.887	1.561	0.79	-3.29	-2.56	0.23	-1.91	-0.56	1.37	2.78	0.64	0.540008	0.858529	0.999991	0.736294	0.999824	0.999161	0.735341	0.659258	0.998535	135.2	233.7	13.8	23	158.4	35.9	94.38	46.44	63.79	106.52	25.31	106.01	115.5	202.4	1.8	335.5	199.7	132.6	21.3
STENVNKLPELSSFGKPSSSVQGTGLIR	1xPhospho [T2]; 1xDeamidated [N6]	Q8IWW6	Rho GTPase-activating protein 12 OS=Homo sapiens OX=9606 GN=ARHGAP12 PE=1 SV=1	0.117	0.102	0.095	0.115	0.099	0.982	0.965	1.212	1.04	-3.09	-3.29	-3.39	-3.12	-3.34	-0.03	-0.05	0.28	0.06	0.978898	0.839287	0.979512	0.919792	0.456495	0.999742	0.977926	0.999719	0.833795	392.4	46	40.2	37.3	45.2	38.8	73.04	149.47	143.26	148.83	11.55	86.56	274.1	30.2	273.9	7.5	390.1	32.1	221.2
DLSPTAEDAELSDFEECEETGELFEEPAPQALATR	1xCarbamidomethyl [C17]; 1xPhospho [S/T]; 1xDeamidated [Q30]	Q86WN1	F-BAR and double SH3 domains protein 1 OS=Homo sapiens OX=9606 GN=FCHSD1 PE=1 SV=1	1.398	0.103	0.096	1.255	1.275	0.897	12.39	13.05	13.257	0.48	-3.28	-3.38	0.33	0.35	-0.16	3.63	3.71	3.73	0.999998	0.806558	0.986864	0.998916	0.998199	0.999777	0.583181	0.912729	0.898732	117	163.7	12	11.3	146.8	149.2	80.55	81.74	61.05	150.34	74.48	70.46	168.3	136	9.1	203.3	7.7	190.2	25.6
HSGGFLSSPADFSQENK	1xPhospho [S]	Q7LBC6	Lysine-specific demethylase 3B OS=Homo sapiens OX=9606 GN=KDM3B PE=1 SV=2	1.024	0.103	0.297	0.123	1.531	0.12	14.853	0.413	5.151	0.03	-3.28	-1.75	-3.03	0.61	-3.06	3.89	-1.28	2.36	1	0.303153	0.830823	0.169546	0.959983	0.15224	0.730381	0.722097	0.998599	147.1	150.7	15.2	43.7	18.1	225.3	28.78	37.01	114.49	84.67	53.37	80.87	117.4	201.1	137.2	140.5	231.4	117.2	96.2
APGLITPGSPPPAQQNQYVHISSSPQNTGR	2xPhospho [S/T]	P54253	Ataxin-1 OS=Homo sapiens OX=9606 GN=ATXN1 PE=1 SV=2	0.123	0.103	0.096	0.081	0.083	0.661	0.809	0.85	0.871	-3.02	-3.28	-3.38	-3.62	-3.58	-0.6	-0.31	-0.23	-0.2	0.433546	0.105734	0.228952	0.0435741	0.177125	0.661403	0.999344	0.896105	0.999972	403.6	49.7	41.6	38.6	32.8	33.7	8.71	128.12	29.33	137.68	49.93	101.41	261.8	286.9	311.7	24.6	284.6	35.3	21.2
QSPDHPTVGAGVLHITENGPTEVDYSPSDMQDSSLSHK	1xPhospho [S/T/Y]	P46821	Microtubule-associated protein 1B OS=Homo sapiens OX=9606 GN=MAP1B PE=1 SV=2	1.219	0.103	0.014	0.544	0.038	0.446	0.368	39.879	2.786	0.29	-3.27	-6.2	-0.88	-4.72	-1.16	-1.44	5.32	1.48	0.998253	0.741388	0.127604	1	0.219059	0.998186	0.88779	0.128253	0.999073	205.6	250.6	21.2	2.8	111.9	7.8	80.32	78.55	8.68	115.59	106.95	38.43	13.1	258.6	228.2	357.7	278.2	25.9	25.5
LAAFADALEFADEEKESPVEFTGHK	1xPhospho [S17]	Q5SY16	Polynucleotide 5'-hydroxyl-kinase NOL9 OS=Homo sapiens OX=9606 GN=NOL9 PE=1 SV=1	1.276	0.103	1.123	1.082	0.995	0.848	9.623	0.963	0.886	0.35	-3.27	0.17	0.11	-0.01	-0.24	3.27	-0.05	-0.17	0.999073	0.263674	0.999957	0.998921	0.959901	1	0.67442	0.99997	0.909286	107.5	137.2	11.1	120.8	116.4	107	6.95	16.52	147.98	12.4	58.78	73.5	104.8	93.2	92.9	118.9	111	150.6	4.4
SHSESASPSALSSSPNNLSPTGWSQPK	2xPhospho [S14; S19]	P04049	RAF proto-oncogene serine/threonine-protein kinase OS=Homo sapiens OX=9606 GN=RAF1 PE=1 SV=1	0.121	0.104	0.098	0.101	0.046	0.838	0.449	1.028	0.472	-3.05	-3.27	-3.34	-3.3	-4.43	-0.25	-1.16	0.04	-1.08	0.331561	0.172732	0.853397	0.823298	0.232425	0.93228	0.999944	1	0.806192	408	49.3	42.2	40.2	41.3	19	70.29	67.85	82.15	123.49	123.56	69.69	437.7	360	58.1	7.8	43.5	51.3	2.5
NATSPQVQRPSFMDYFDKQDFK	1xPhospho [S]	Q13188	Serine/threonine-protein kinase 3 OS=Homo sapiens OX=9606 GN=STK3 PE=1 SV=2	0.151	0.104	0.925	0.943	1.28	6.26	12.29	1.019	1.383	-2.73	-3.26	-0.11	-0.08	0.36	2.65	3.62	0.03	0.47	0.911782	0.645677	0.920366	0.99811	0.999932	0.990388	0.527516	0.992232	0.841422	136.3	20.5	14.2	126.1	128.5	174.4	5.79	132.92	146.77	88.69	80.61	18.48	122.7	119.1	109.6	17.2	17.9	191.6	12.4
AMKPPGGESSNLFGSPEEATPSSRPNR	1xDeamidated [N11]; 1xPhospho [S15]	Q9H910	Jupiter microtubule associated homolog 2 OS=Homo sapiens OX=9606 GN=JPT2 PE=1 SV=1	0.236	0.105	0.819	0.709	0.156	3.004	1.492	0.867	0.191	-2.08	-3.26	-0.29	-0.5	-2.68	1.59	0.58	-0.21	-2.39	0.898904	0.382645	0.976794	0.864627	0.637135	0.999999	0.996491	0.998176	0.952194	198.3	46.8	20.8	162.4	140.7	31	65.66	104.44	23.7	76.58	83.46	17.36	58.5	224	318.1	198.6	52.9	20.8	23.5
QSYAPAPHPMAPPSPSTNSSSNNSSNNSSGEQLSK	1xPhospho [S/T]; 1xDeamidated [N]	Q6XE24	RNA-binding motif, single-stranded-interacting protein 3 OS=Homo sapiens OX=9606 GN=RBMS3 PE=1 SV=1	1.101	0.105	1.319	0.934	0.171	0.849	1.625	0.708	0.13	0.14	-3.25	0.4	-0.1	-2.55	-0.24	0.7	-0.5	-2.95	0.99478	0.286227	0.998635	1	0.828523	0.997264	0.893409	0.99945	0.958538	129.6	142.7	13.6	170.9	121.1	22.1	10.24	88.58	44.36	96	10.88	145.3	110.6	105.4	127.8	12.5	223.9	121.7	20.8
LAERLSPFLAESK	1xPhospho [S6]	O15417	Trinucleotide repeat-containing gene 18 protein OS=Homo sapiens OX=9606 GN=TNRC18 PE=1 SV=3	0.304	0.105	0.154	0.274	0.427	0.902	4.055	1.775	2.764	-1.72	-3.25	-2.7	-1.87	-1.23	-0.15	2.02	0.83	1.47	0.606348	0.344388	0.232163	0.560064	0.959518	0.999999	0.78221	0.978333	0.624612	265.1	80.5	27.9	40.9	72.6	113.1	56.84	110.34	112.09	40.11	53.7	79.28	347	91.7	237.4	72.1	8.9	232.6	126
DVLDIEQFSTVK	1xPhospho [S9]	P34947	G protein-coupled receptor kinase 5 OS=Homo sapiens OX=9606 GN=GRK5 PE=1 SV=1	0.691	0.105	0.585	0.89	0.675	1.288	6.411	1.522	1.154	-0.53	-3.25	-0.77	-0.17	-0.57	0.37	2.68	0.61	0.21	0.997127	0.964966	0.85655	0.999396	0.999403	0.967414	0.996671	0.692754	0.959026	152.1	105	16	88.9	135.3	102.6	66.31	82.75	124.79	93.86	24.71	71.47	182.1	163	29.9	158.9	112.6	8.2	17.2
NASNLER	1xPhospho [S3]	Q86V48	Leucine zipper protein 1 OS=Homo sapiens OX=9606 GN=LUZP1 PE=1 SV=2	1.855	0.106	1.092	1.623	1.337	0.875	12.666	1.486	1.224	0.89	-3.24	0.13	0.7	0.42	-0.19	3.66	0.57	0.29	0.97374	0.0163533	0.999985	0.994116	0.999865	0.999927	0.0244341	0.981469	0.999999	85.6	158.7	9	93.4	138.8	114.4	51.5	16.75	125.76	16.31	13.2	39.9	67.8	170.1	83.3	182.9	154.6	130.7	8.8
NEEGAPQEGILEDMPVDPDNEAYEMPSEEGYQDYEPEA	1xDeamidated [N20]; 1xPhospho [S/Y]	P37840	Alpha-synuclein OS=Homo sapiens OX=9606 GN=SNCA PE=1 SV=1	1.147	0.106	0.819	0.084	0.103	0.073	0.971	0.103	0.126	0.2	-3.24	-0.29	-3.57	-3.28	-3.77	-0.04	-3.29	-2.99	0.98537	0.845093	0.999996	0.751691	0.764213	0.976493	0.999977	0.687962	0.70125	184.2	211.2	19.5	150.8	15.5	18.9	88.1	91.44	1.4	74.58	68.36	65.82	14.7	341.7	202.5	351.2	232.1	1	20.9
APAASEGNHTDGAEEAAGSCAQAPSHSPPNKPK	1xCarbamidomethyl [C20]; 1xPhospho [S]	Q92560	Ubiquitin carboxyl-terminal hydrolase BAP1 OS=Homo sapiens OX=9606 GN=BAP1 PE=1 SV=2	0.17	0.106	2.71	2.203	2.283	12.946	21.458	0.813	0.842	-2.55	-3.23	1.44	1.14	1.19	3.69	4.42	-0.3	-0.25	0.920351	0.634947	0.806459	0.861727	0.998132	0.352158	0.409567	0.999995	0.954225	70.8	12.1	7.5	191.9	156	161.6	55.23	140.51	150.48	14.94	16.68	70.49	95.9	67.3	26.4	132.9	7.7	11.5	7.2
QLAFSTVGTPDYIAPEVFMQTGYNK	1xDeamidated [Q1]; 1xPhospho [S/T]	Q15208	Serine/threonine-protein kinase 38 OS=Homo sapiens OX=9606 GN=STK38 PE=1 SV=1	1.105	0.107	0.036	0.062	0.907	0.056	8.5	1.752	25.498	0.14	-3.23	-4.81	-4	-0.14	-4.15	3.09	0.81	4.67	0.98381	0.81496	0.10946	0.0678357	0.977539	0.192369	0.994101	0.999625	0.314668	186.5	206.2	19.9	6.6	11.6	169.2	21.32	80.01	126.65	73.86	86.53	79.83	236.2	212.6	153.2	234.9	12.2	235.2	22.7
ERPVQSLKTSRDTSPSSGSAVSSSK	1xDeamidated [Q5]; 2xPhospho [S/T]	Q8NEY8	Periphilin-1 OS=Homo sapiens OX=9606 GN=PPHLN1 PE=1 SV=2	1.452	0.107	0.878	1.326	1.801	0.913	16.83	1.51	2.051	0.54	-3.22	-0.19	0.41	0.85	-0.13	4.07	0.59	1.04	0.999899	0.93216	0.999736	0.999996	0.912176	0.999205	0.437386	0.999984	0.975814	91.4	132.7	9.8	80.3	121.2	164.6	93.1	85.3	97.2	72.82	85.99	33.25	4.9	102.6	188.7	157.2	149	1.6	11
RSYDVPPPPMEPDHPFYSNISK	1xPhospho [S2]; 1xOxidation [M10]; 1xDeamidated [N19]	Q8N0Y7; P18669	Probable phosphoglycerate mutase 4 OS=Homo sapiens OX=9606 GN=PGAM4 PE=3 SV=1 Phosphoglycerate mutase 1 OS=Homo sapiens OX=9606 GN=PGAM1 PE=1 SV=2	0.933	0.107	0.222	0.198	0.74	0.212	6.886	0.892	3.335	-0.1	-3.22	-2.17	-2.34	-0.44	-2.24	2.78	-0.16	1.74	0.998829	0.952665	0.999995	0.998171	0.976538	0.966214	0.637282	0.999668	0.954873	187.5	175	20.1	41.6	37.1	138.7	77.99	60.53	140.64	119.17	103.1	23.34	163	11.3	166.9	152.1	35.6	164.1	8.7
ESDKEEPVTPTSGGGPMSPQDDEAEEESDNELSSGTGDVSKDCPEK	1xPhospho [S28]; 1xDeamidated [N/Q]; 1xCarbamidomethyl [C43]	Q5R372	Rab GTPase-activating protein 1-like OS=Homo sapiens OX=9606 GN=RABGAP1L PE=1 SV=1	0.153	0.107	0.053	0.125	0.076	0.815	0.71	2.346	1.434	-2.71	-3.22	-4.23	-3	-3.71	-0.3	-0.49	1.23	0.52	0.993878	0.756586	0.821055	0.972312	0.844166	0.999919	0.999967	0.996236	1	396.1	60.7	42.5	21.1	49.4	30.2	88.05	111.8	41.4	151.4	138.31	141.82	397.9	233.9	17.8	35.8	32.6	220.8	25.1
MSPMGTASGSNSPTSDSASVQR	1xPhospho [S/T]; 1xDeamidated [N11]	O76080	AN1-type zinc finger protein 5 OS=Homo sapiens OX=9606 GN=ZFAND5 PE=1 SV=1	0.494	0.107	0.623	0.528	0.284	1.068	2.648	0.847	0.457	-1.02	-3.22	-0.68	-0.92	-1.81	0.09	1.4	-0.24	-1.13	0.973889	0.0435169	0.996387	0.968012	0.122277	1	0.986523	0.999597	0.249721	197.6	97.6	21.2	123	104.3	56.2	67.77	52.78	41.07	75.49	10.11	83.13	74.2	334.6	173.1	85.5	65.3	172.3	9.1
LPNGLGGPNGFPKPTPEEGPPELNRQSPNSSSAAASVASR	1xDeamidated [N]; 1xPhospho [S27]	Q9H1B7	Probable E3 ubiquitin-protein ligase IRF2BPL OS=Homo sapiens OX=9606 GN=IRF2BPL PE=1 SV=1	1.044	0.107	0.168	0.987	0.93	0.946	8.659	5.876	5.538	0.06	-3.22	-2.57	-0.02	-0.1	-0.08	3.11	2.55	2.47	0.984166	0.53411	0.754157	0.983986	0.963624	1	0.926061	0.978923	0.992131	141.6	147.8	15.2	23.8	139.8	131.8	5.98	71.51	128.54	112.46	65.83	68.73	135.5	152.3	147.5	21.2	176	154	15.9
LAVLSSSLTHWK	1xPhospho [S/T]	Q6IAA8	Ragulator complex protein LAMTOR1 OS=Homo sapiens OX=9606 GN=LAMTOR1 PE=1 SV=2	0.789	0.108	1.082	0.764	0.11	0.967	1.024	0.706	0.102	-0.34	-3.21	0.11	-0.39	-3.18	-0.05	0.03	-0.5	-3.29	0.999975	0.0440818	0.999616	0.99998	0.0849422	1	0.998421	0.996866	0.0521578	155.7	122.9	16.8	168.5	118.9	17.2	17.29	13.43	126.23	17.6	27.01	86.87	141.9	154.6	109.3	139.6	112	111	15.3
RPDYAPMESSDEEDEEFQFIKK	1xOxidation [M7]; 2xPhospho [S9; S10]	P55081	Microfibrillar-associated protein 1 OS=Homo sapiens OX=9606 GN=MFAP1 PE=1 SV=2	1.029	0.108	1.404	1.479	1.62	1.438	14.997	1.053	1.154	0.04	-3.21	0.49	0.56	0.7	0.52	3.91	0.08	0.21	0.998811	0.789388	0.999995	0.966695	0.8925	0.998253	0.254721	0.940315	0.843358	90.4	92.9	9.8	126.9	133.7	146.4	59.37	16.96	146.36	84.35	14.07	15.03	112.8	25.7	88.9	71.4	100.4	91.5	7.3
GTGSGGQLQDLDCSSSDDEGAAQNSTKPSATK	3xPhospho [S14; S15; S]; 1xDeamidated [N/Q]; 1xCarbamidomethyl [C13]	P08240	Signal recognition particle receptor subunit alpha OS=Homo sapiens OX=9606 GN=SRPRA PE=1 SV=2	1.227	0.109	0.199	0.948	0.096	0.773	0.88	4.759	0.48	0.3	-3.2	-2.33	-0.08	-3.39	-0.37	-0.18	2.25	-1.06	0.923601	0.493827	0.998862	0.999988	0.215217	0.960401	0.985969	0.994502	0.358884	167.7	205.7	18.2	33.4	158.9	16	96.59	10.17	52.76	118.81	73.95	76.14	148.5	317.7	11	215.1	182.1	180.4	8.6
VSSPLPSPSAMTDAANSQAAAK	1xPhospho [S/T]	Q8WXI9	Transcriptional repressor p66-beta OS=Homo sapiens OX=9606 GN=GATAD2B PE=1 SV=1	1.437	0.109	1.418	1.572	0.391	1.094	3.588	1.109	0.276	0.52	-3.2	0.5	0.65	-1.36	0.13	1.84	0.15	-1.86	0.999745	0.085343	0.997713	0.99225	0.725727	0.999675	0.593617	0.999994	0.484395	101.2	145.5	11	143.6	159.2	39.6	8.42	34.26	145.65	10.23	3.5	11.75	98	97.7	112.8	81	168	140.8	1.6
QIAQSKEDDDVIVNKPHVSDEEEEEPPFYHHPFK	2xDeamidated [Q1; N/Q]; 1xPhospho [S19]	P18583	Protein SON OS=Homo sapiens OX=9606 GN=SON PE=1 SV=4	0.875	0.109	0.993	0.901	0.708	1.03	6.496	0.908	0.713	-0.19	-3.2	-0.01	-0.15	-0.5	0.04	2.7	-0.14	-0.49	0.997968	0.614533	1	0.996832	0.999999	1	0.661223	0.994871	1	130.9	114.4	14.3	129.9	117.9	92.7	75.81	5.87	149.15	79.26	24.58	73.61	13.1	141.9	153.5	124.1	128.8	114.6	147.9
FQSQADQDQQASGLQSPPSR	1xPhospho [S16]	Q9P2B4	CTTNBP2 N-terminal-like protein OS=Homo sapiens OX=9606 GN=CTTNBP2NL PE=1 SV=2	1.702	0.109	1.872	2.328	0.329	1.368	3.015	1.243	0.176	0.77	-3.19	0.9	1.22	-1.6	0.45	1.59	0.31	-2.51	0.820083	0.194776	0.949242	0.868823	0.507606	0.999997	0.974721	0.999832	0.158925	81.7	139.1	8.9	153	190.3	26.9	83.3	90.58	120.48	28.39	19.28	98.78	61.2	161.8	28	104.1	411.2	87.9	6.7
TSPGTSSAYTSDSPGSYHNEEDEEEDGGEEGMDEQYR	1xPhospho [S/T]; 1xDeamidated [N19]	Q96RE7	Nucleus accumbens-associated protein 1 OS=Homo sapiens OX=9606 GN=NACC1 PE=1 SV=1	0.759	0.109	1.001	0.983	0.622	1.296	5.686	0.982	0.621	-0.4	-3.19	0	-0.02	-0.69	0.37	2.51	-0.03	-0.69	0.999962	0.0708588	0.983405	0.945767	0.946313	0.979673	0.273963	0.999917	0.999921	134.1	101.8	14.7	134.2	131.8	83.4	21.21	10.25	48.03	73.18	76.48	83.55	161	149.4	105.3	132.9	110.5	113.4	6.3
EPLPPFENQDIHSASA	1xPhospho [S15]	Q14693	Phosphatidate phosphatase LPIN1 OS=Homo sapiens OX=9606 GN=LPIN1 PE=1 SV=2	1.05	0.109	0.123	0.098	0.12	0.093	1.1	0.796	0.979	0.07	-3.19	-3.02	-3.35	-3.05	-3.42	0.14	-0.33	-0.03	0.99666	0.71935	0.879138	0.562096	0.848347	0.816196	0.999804	0.98845	1	239.9	252	26.2	29.5	23.5	28.9	5.39	74.41	132.3	119.6	164.11	107.13	169.4	181.9	163.9	177.9	18	185.8	114.3
GSPALLPSTPTMPLFPHVLDLLAPLDSSR	2xPhospho [S2; S8]	Q9UGR2	Zinc finger CCCH domain-containing protein 7B OS=Homo sapiens OX=9606 GN=ZC3H7B PE=1 SV=2	0.117	0.11	1.066	1.236	1.595	10.557	14.55	1.16	1.497	-3.09	-3.19	0.09	0.31	0.67	3.4	3.86	0.21	0.58	0.454687	0.971957	0.999999	1	0.998876	0.477717	0.867452	0.999994	0.999681	117.1	13.7	12.8	124.8	144.8	186.8	44.75	105.94	169.4	11.89	56.25	40.45	102.2	70.5	39.1	29	2.4	8.3	7.7
GPTSSPCEEEGDEGEEDRTSDLRDEASSVTR	2xPhospho [S/T]; 1xCarbamidomethyl [C7]	Q86VM9	Zinc finger CCCH domain-containing protein 18 OS=Homo sapiens OX=9606 GN=ZC3H18 PE=1 SV=2	0.655	0.11	0.931	1.27	0.728	1.94	6.637	1.364	0.782	-0.61	-3.19	-0.1	0.34	-0.46	0.96	2.73	0.45	-0.35	0.925105	0.00140787	0.999744	0.984	0.381244	0.611555	0.0397465	0.998648	0.265293	127.9	83.7	14	119	162.3	93.1	19.28	30.25	16.87	18.38	12.83	68.58	133.2	143.7	97.8	114.4	87.2	61.4	11.7
AGPTLTDENGDDLGLPPSPGDTSYYQDQVDDFHEAR	2xDeamidated [Q26; N/Q]; 1xPhospho [S/T/Y]	Q9NQZ2	Something about silencing protein 10 OS=Homo sapiens OX=9606 GN=UTP3 PE=1 SV=1	3.434	0.11	3.979	3.133	1.107	0.913	10.042	0.787	0.278	1.78	-3.18	1.99	1.65	0.15	-0.13	3.33	-0.34	-1.85	0.817308	0.646468	0.907714	0.999984	0.999996	0.738647	0.580964	0.847736	0.941669	47	161.4	5.2	187.1	147.3	52	40	19.7	155.42	44.81	83.39	16.81	49.1	80.8	37.6	168.7	223.3	155.5	2.5
DQPSPCLSSAEDSGVDEGQGSPSEMVHSSEFR	1xDeamidated [Q]; 1xPhospho [S4]; 1xCarbamidomethyl [C6]	Q8IWE5	Pleckstrin homology domain-containing family M member 2 OS=Homo sapiens OX=9606 GN=PLEKHM2 PE=1 SV=2	1.065	0.11	0.106	0.929	1.028	0.872	9.32	8.724	9.659	0.09	-3.18	-3.23	-0.11	0.04	-0.2	3.22	3.12	3.27	1	0.148258	0.664752	0.921137	0.932987	0.925928	0.51775	0.99274	0.989993	141.5	150.8	15.6	15.1	131.4	145.5	34.08	18.57	67.46	126.09	78.95	81.82	210.4	155.4	103.7	165.6	117.7	166.1	3.4
LHSAPNLSDLHVVRPK	1xPhospho [S]	O75385	Serine/threonine-protein kinase ULK1 OS=Homo sapiens OX=9606 GN=ULK1 PE=1 SV=2	0.193	0.111	0.071	0.122	0.055	0.632	0.501	1.723	0.784	-2.37	-3.17	-3.82	-3.04	-4.17	-0.66	-1	0.79	-0.35	0.995011	0.400046	0.793491	0.787574	0.241388	0.965765	0.998752	1	0.874948	386.6	74.6	42.8	27.4	47.1	21.4	75.05	99.27	117.9	141.52	53.55	80.91	415.7	309.6	42.8	56.1	59.7	291.3	34.3
REDQGPPCPSPVGGGDPLHR	1xCarbamidomethyl [C8]; 1xPhospho [S10]	Q13563	Polycystin-2 OS=Homo sapiens OX=9606 GN=PKD2 PE=1 SV=3	0.788	0.111	0.946	1.028	1.234	1.304	11.125	1.087	1.305	-0.34	-3.17	-0.08	0.04	0.3	0.38	3.48	0.12	0.38	0.999284	0.723662	0.999999	0.72844	0.99985	0.887103	0.585494	0.677623	0.999985	117.5	92.6	13	111.1	120.8	145	14.34	41.94	141.01	29.14	86.17	20.23	94.7	126.5	112.4	112.1	44.6	88.6	139.2
VSSPSCDSQGLHAEEAPSSEPQSPVAQTSGWPACSTPLPLVSR	2xCarbamidomethyl [C6; C34]; 1xPhospho [S/T]	Q96RE7	Nucleus accumbens-associated protein 1 OS=Homo sapiens OX=9606 GN=NACC1 PE=1 SV=1	0.123	0.111	0.031	1.442	0.022	11.692	0.199	46.361	0.712	-3.02	-3.17	-5.01	0.53	-5.5	3.55	-2.33	5.53	-0.49	0.613997	0.836747	0.576839	0.99999	0.300036	0.534205	0.899326	0.498178	0.992713	219.8	27.1	24.4	6.8	316.9	4.9	21.76	140.81	131.43	164.33	12.01	164.11	149.3	144	209.7	138.1	18.4	1.9	16.6
RNTIDSTSSFSQFR	1xPhospho [T3]	Q8TDN4	CDK5 and ABL1 enzyme substrate 1 OS=Homo sapiens OX=9606 GN=CABLES1 PE=1 SV=2	0.321	0.111	0.083	0.259	0.078	0.805	0.706	3.125	0.948	-1.64	-3.17	-3.6	-1.95	-3.67	-0.31	-0.5	1.64	-0.08	1	0.600643	0.259533	0.984458	0.364595	0.976828	0.9973	0.574992	0.999823	323.9	104.1	36	26.8	83.8	25.4	78.77	101.87	38.04	16.64	18.32	75.41	330.4	311.7	20.3	57.6	100.2	411.8	62.9
RTPTMPQEEAAACPPHILPPEK	1xPhospho [T2]; 1xDeamidated [Q7]; 1xCarbamidomethyl [C13]	Q9NYV4	Cyclin-dependent kinase 12 OS=Homo sapiens OX=9606 GN=CDK12 PE=1 SV=2	0.247	0.112	0.23	0.044	0.144	0.177	1.291	0.19	0.626	-2.02	-3.16	-2.12	-4.51	-2.8	-2.49	0.37	-2.39	-0.68	0.878992	0.80432	0.999927	0.554327	0.991071	0.987282	0.981124	0.674421	0.998939	337.7	83.4	37.7	77.7	14.8	48.6	76.52	129.12	68.3	113.82	62.3	119.1	21.9	271.2	271.1	1.4	311.8	67	30.2
IIGEDSPSRLDR	1xPhospho [S]	Q9Y618	Nuclear receptor corepressor 2 OS=Homo sapiens OX=9606 GN=NCOR2 PE=1 SV=3	0.834	0.112	1.148	0.268	0.34	0.321	3.046	0.233	0.296	-0.26	-3.16	0.2	-1.9	-1.56	-1.64	1.61	-2.1	-1.76	0.933647	0.0315857	0.999776	0.370151	0.649329	0.859026	0.350804	0.506124	0.793088	162.1	135.2	18.1	186.1	43.4	55.1	46.28	70.5	11.91	59.74	20.49	57.43	187.3	232.3	81.7	195.8	26	156.2	24.2
TKSVSSMSEFESLLDCSPYLAGGDAR	1xPhospho [S]; 1xCarbamidomethyl [C16]	O94964	Microtubule cross-linking factor 2 OS=Homo sapiens OX=9606 GN=MTCL2 PE=1 SV=3	0.671	0.112	0.156	0.141	0.106	0.21	0.953	0.905	0.684	-0.58	-3.16	-2.68	-2.83	-3.23	-2.25	-0.07	-0.14	-0.55	0.999991	0.648489	0.55084	0.898721	0.477594	0.940966	0.999564	0.981069	0.999993	274.5	184.2	30.7	42.7	38.7	29.2	102.36	56.85	27.4	63.48	101.86	50.15	620.8	12.5	262.7	45.7	176.3	176.7	44
VEMGTSSQNDVDMSWIPQETLNQINKASPR	2xOxidation [M3; M13]; 1xPhospho [S28]	P43307	Translocon-associated protein subunit alpha OS=Homo sapiens OX=9606 GN=SSR1 PE=1 SV=3	1.113	0.112	1.24	1.22	1.597	1.096	14.275	0.984	1.288	0.15	-3.16	0.31	0.29	0.68	0.13	3.84	-0.02	0.36	0.903591	0.861559	0.9999	0.875427	0.72604	1	0.19051	0.947195	0.839148	95.5	106.3	10.7	118.4	116.5	152.5	77.94	14.03	127.49	74.29	10.33	10.79	10	102.3	131	98.3	130.3	113.8	8.8
QTPTPPTTQLPQQVQPSLPAAPSADQPQQQPR	1xPhospho [T]; 1xDeamidated [Q]	Q09472	Histone acetyltransferase p300 OS=Homo sapiens OX=9606 GN=EP300 PE=1 SV=2	0.824	0.112	0.095	0.173	0.149	0.21	1.327	1.826	1.568	-0.28	-3.16	-3.4	-2.53	-2.75	-2.25	0.41	0.87	0.65	0.993523	0.903291	0.973704	0.934401	0.933903	0.998618	0.999998	0.999961	0.999959	255.1	210.1	28.6	24.2	44.1	37.9	75.89	86.28	120.08	140.95	133.47	27.46	272.2	232.2	23.5	244	3.8	191.3	26
TEDEEFLIQHLLQAPSPPR	1xDeamidated [Q9]; 1xPhospho [S16]	Q9ULL5	Proline-rich protein 12 OS=Homo sapiens OX=9606 GN=PRR12 PE=1 SV=3	0.078	0.112	0.545	0.596	0.78	7.685	6.962	1.093	1.43	-3.69	-3.16	-0.87	-0.75	-0.36	2.94	2.8	0.13	0.52	0.404622	0.431939	0.998735	0.998427	0.998178	0.620895	0.252739	1	0.965169	192.9	15	21.6	105.2	114.9	150.4	71.08	144.93	41.15	60	66.37	25.82	231.7	214.7	28.8	150.8	2.2	16.7	10.5
VNFPENGFLSPDKLSLLEK	1xDeamidated [N]; 1xPhospho [S10]	P31689	DnaJ homolog subfamily A member 1 OS=Homo sapiens OX=9606 GN=DNAJA1 PE=1 SV=2	2.896	0.112	0.721	0.84	3.22	0.29	28.709	1.166	4.468	1.53	-3.16	-0.47	-0.25	1.69	-1.79	4.84	0.22	2.16	0.574147	0.835506	0.997363	0.99991	0.711614	0.699378	0.16729	0.999906	0.913425	68.3	197.7	7.7	49.2	57.4	219.8	57.09	24.16	157.36	95.5	23.58	51.6	78.9	19.7	60.6	224.5	138	175.6	4.5
IRERSESLDPDSSMDTTLILK	1xPhospho [S5]	Q5SW79	Centrosomal protein of 170 kDa OS=Homo sapiens OX=9606 GN=CEP170 PE=1 SV=1	0.106	0.112	1.145	0.712	0.034	6.686	0.302	0.621	0.03	-3.23	-3.16	0.2	-0.49	-4.88	2.74	-1.73	-0.69	-5.08	0.20113	0.0701129	1	0.719542	0.0032437	0.881001	0.476905	0.704839	0.00310806	193	20.5	21.7	221	137.3	6.5	30.89	132.65	25.01	12.3	69.37	94.2	280.1	163	177.2	160.4	18.9	10.9	25.2
ASPGLLPVANGNSLNK	1xPhospho [S2]; 1xDeamidated [N]	Q14814	Myocyte-specific enhancer factor 2D OS=Homo sapiens OX=9606 GN=MEF2D PE=1 SV=1	0.29	0.112	0.977	0.259	0.248	0.893	2.209	0.265	0.254	-1.79	-3.15	-0.03	-1.95	-2.01	-0.16	1.14	-1.92	-1.98	0.478897	0.184024	0.999998	0.872171	0.569529	0.972844	0.945893	0.907815	0.624633	207.9	60.2	23.4	203.2	53.8	51.6	57.96	108.73	47.9	55.12	80.24	16.99	279.2	205.5	68.6	182.7	6.8	59.5	41.7
LSRGSIDREDGSLQGPIGNQHIYQPVGKPDPAAPPK	2xPhospho [S5; S]; 1xDeamidated [N/Q]	Q05397	Focal adhesion kinase 1 OS=Homo sapiens OX=9606 GN=PTK2 PE=1 SV=2	0.226	0.112	0.018	0.169	0.032	0.75	0.281	9.203	1.72	-2.15	-3.15	-5.77	-2.56	-4.98	-0.42	-1.83	3.2	0.78	0.923622	0.897307	0.69521	0.879178	0.29906	0.999994	0.838226	0.99878	0.969831	385.3	86.9	43.3	7.1	65.1	12.2	55.05	132.71	112.79	167.16	144.61	91.92	269.2	71.9	242.7	54.7	294.8	2.7	117
NQVEEDAEDSGEADDEEKPEIHKPGQNSFSK	1xPhospho [S10]; 1xDeamidated [N/Q]	O75717	WD repeat and HMG-box DNA-binding protein 1 OS=Homo sapiens OX=9606 GN=WDHD1 PE=1 SV=1	0.162	0.113	1.153	0.761	0.562	4.686	4.985	0.66	0.487	-2.62	-3.15	0.21	-0.39	-0.83	2.23	2.32	-0.6	-1.04	0.519171	0.142234	0.999397	0.959176	0.997791	0.924847	0.267701	0.995576	0.999998	159.9	26	18	184.4	121.8	89.9	48.29	127.16	87.32	64.78	50.96	92.16	129.9	227.7	88	174.8	21.1	16.6	51.2
FVPAENDSILMNPAQDGEVQLSQNDDKTK	1xPhospho [S22]	Q12888	TP53-binding protein 1 OS=Homo sapiens OX=9606 GN=TP53BP1 PE=1 SV=2	0.071	0.113	0.814	0.211	0.809	2.99	7.174	0.26	0.994	-3.82	-3.15	-0.3	-2.24	-0.31	1.58	2.84	-1.95	-0.01	0.735219	0.760099	0.999923	0.984658	0.999975	0.973003	0.842667	0.997504	1	198.8	14.1	22.4	161.8	42	160.8	66.93	142.98	137.21	64.88	91.24	63.78	183.4	222.2	35.6	181.5	13	10.9	8.1
NTSAEKELSSPISPK	1xPhospho [S13]	P78559	Microtubule-associated protein 1A OS=Homo sapiens OX=9606 GN=MAP1A PE=1 SV=6	0.349	0.113	0.718	0.563	0.524	1.613	4.644	0.784	0.729	-1.52	-3.15	-0.48	-0.83	-0.93	0.69	2.22	-0.35	-0.46	0.999491	0.782853	0.999188	0.999953	0.999894	0.995017	0.884963	0.999985	0.991265	183.6	64.1	20.7	131.9	103.5	96.2	76.37	45.19	137.39	35.07	54.97	71	176.4	17.7	211.4	46.2	108.9	61.6	19.9
MSSTIFSTGGKDPLSANHSLKPLPSVPEEK	1xPhospho [S/T]; 1xDeamidated [N17]	Q13177	Serine/threonine-protein kinase PAK 2 OS=Homo sapiens OX=9606 GN=PAK2 PE=1 SV=3	0.318	0.113	0.3	0.341	0.315	1.074	2.788	1.138	1.048	-1.65	-3.15	-1.74	-1.55	-1.67	0.1	1.48	0.19	0.07	0.964204	0.904832	0.777248	0.998442	0.999998	0.998413	0.868268	0.936154	0.725624	251.4	79.9	28.4	75.4	85.8	79.1	76.21	77.6	84.17	79.14	108.59	87.32	20.3	247	234.2	116.2	12	74.4	91.7
ESQNTAEIISPPSPDRPPHSQTSGSCYYHVISK	1xPhospho [S13]; 1xCarbamidomethyl [C26]	Q03164	Histone-lysine N-methyltransferase 2A OS=Homo sapiens OX=9606 GN=KMT2A PE=1 SV=5	0.968	0.113	1.152	1.218	0.87	1.258	7.705	1.057	0.755	-0.05	-3.15	0.2	0.28	-0.2	0.33	2.95	0.08	-0.41	0.937656	0.753665	0.997632	0.998631	0.938422	0.994122	0.997154	1	0.996301	112.8	109.2	12.7	129.9	137.4	98.1	8.69	82.71	127.61	72.47	70.73	83.9	140.9	130.6	118.3	126.5	151.7	5.4	14.8
RDSFIGTPYWMAPEVVMCETMK	1xPhospho [S3]; 1xCarbamidomethyl [C18]	O94804	Serine/threonine-protein kinase 10 OS=Homo sapiens OX=9606 GN=STK10 PE=1 SV=1	4.408	0.113	1.027	0.993	0.99	0.225	8.758	0.967	0.964	2.14	-3.15	0.04	-0.01	-0.01	-2.15	3.13	-0.05	-0.05	0.995245	0.87364	0.999964	0.996432	1	1	0.878068	0.999661	0.999951	70.3	310.1	7.9	72.2	69.8	69.6	107.19	81.59	120.04	115.86	109.48	137.92	9.8	50.9	166	247.8	224.3	9.9	5.8
ATSPLCTSTASMVSSSPSTPSNIPQKPSQPAAK	1xPhospho [S/T]; 1xCarbamidomethyl [C6]; 1xDeamidated [N22]	P30622	CAP-Gly domain-containing linker protein 1 OS=Homo sapiens OX=9606 GN=CLIP1 PE=1 SV=2	0.039	0.113	1.079	0.925	0.053	23.81	0.47	0.857	0.049	-4.69	-3.14	0.11	-0.11	-4.23	4.57	-1.09	-0.22	-4.34	0.499943	0.763042	0.891184	0.969264	0.869708	0.895407	0.999895	0.99964	1	187	7.3	21.1	201.7	172.9	9.9	23.71	11.66	107.43	86.89	87.91	158.53	126.2	194.2	200.3	7.5	7.2	9	3.5
QAAASATQTIAAAQHAASTPK	1xPhospho [S18]	Q9Y490	Talin-1 OS=Homo sapiens OX=9606 GN=TLN1 PE=1 SV=3	0.687	0.113	0.474	0.25	0.492	0.364	4.346	0.528	1.038	-0.54	-3.14	-1.08	-2	-1.02	-1.46	2.12	-0.92	0.05	0.850052	0.0454393	0.938246	0.620936	0.840654	0.997527	0.287841	0.980527	0.999746	198.9	136.6	22.5	94.3	49.8	97.9	5.56	71.86	109.65	52.48	57.02	45.64	171.5	188.7	189.7	25.2	186.3	129.6	73.9
TASIKPEVALLDTQDMENMSDDDGWEFVNLGDQQSFGIK	1xPhospho [S/T]; 1xDeamidated [N/Q]	O00410	Importin-5 OS=Homo sapiens OX=9606 GN=IPO5 PE=1 SV=4	0.751	0.114	1.196	0.026	1.123	0.035	9.867	0.022	0.939	-0.41	-3.14	0.26	-5.26	0.17	-4.85	3.3	-5.52	-0.09	1	0.806631	0.990524	0.40073	0.990873	0.366613	0.487834	0.178629	1	142.5	107	16.2	170.5	3.7	160	73.51	121.07	123.06	33.26	159.52	26.01	145.5	130.7	15.1	98.2	401	9.5	14.9
HRSEPQHPK	1xPhospho [S3]	Q9HB19	Pleckstrin homology domain-containing family A member 2 OS=Homo sapiens OX=9606 GN=PLEKHA2 PE=1 SV=3	0.883	0.114	0.606	1.239	0.599	1.403	5.257	2.043	0.987	-0.18	-3.13	-0.72	0.31	-0.74	0.49	2.39	1.03	-0.02	1	0.875723	1	0.840432	0.994914	0.817929	0.614611	0.840939	0.994967	135.1	119.3	15.4	81.9	167.4	80.9	79.28	76.21	118.55	67.64	29.81	25.33	9.9	166.9	145	141.5	128.1	11.6	16.5
ERPAEPLTPPPSYGHQPQTGSGESSGASGDKDHLYSTVCKPR	2xPhospho [T8; S36]; 1xDeamidated [Q]; 1xCarbamidomethyl [C39]	O43294	Transforming growth factor beta-1-induced transcript 1 protein OS=Homo sapiens OX=9606 GN=TGFB1I1 PE=1 SV=2	0.227	0.114	1.442	1.245	0.275	5.485	2.417	0.863	0.191	-2.14	-3.13	0.53	0.32	-1.86	2.46	1.27	-0.21	-2.39	0.999943	0.309356	0.818186	0.830325	0.999867	0.728757	0.419453	1	0.693532	139.4	31.6	15.9	201.1	173.5	38.4	81.69	89.34	84.46	24.45	24.52	109.68	134.3	165.9	7.6	30.5	118.9	26.3	15.3
DLFDLNSSEEDDTEGFSER	1xDeamidated [N6]; 2xPhospho [S7; S8]	Q9Y3T9	Nucleolar complex protein 2 homolog OS=Homo sapiens OX=9606 GN=NOC2L PE=1 SV=4	1.515	0.114	1.386	1.07	0.293	0.706	2.561	0.772	0.211	0.6	-3.13	0.47	0.1	-1.77	-0.5	1.36	-0.37	-2.24	0.955919	0.87604	0.997726	0.99926	0.990379	0.84372	0.99484	0.968771	0.906253	111.6	169	12.7	154.7	119.4	32.7	64.87	24.72	129.32	66.82	81.65	126.43	123.1	22.1	117.7	178.4	196.1	118.6	7.9
ATIRPAKSMDSLCSVPVEGK	1xPhospho [S8]; 1xCarbamidomethyl [C13]	Q2M1Z3	Rho GTPase-activating protein 31 OS=Homo sapiens OX=9606 GN=ARHGAP31 PE=1 SV=2	0.308	0.114	0.826	0.841	1.049	2.731	9.16	1.017	1.269	-1.7	-3.13	-0.28	-0.25	0.07	1.45	3.2	0.02	0.34	0.94264	0.783207	0.961292	0.987502	0.998395	0.999752	0.939905	0.999959	0.998155	145	44.6	16.6	119.8	121.9	152.1	54.95	117.29	68.18	90.89	80.7	78.64	54.8	167.1	205.4	51.4	194.4	5.8	13.1
LAEAPSPAPTPSPTPVEDLGPQTSTSPGRLSPDFAEELR	2xPhospho [T10; S31]; 1xDeamidated [Q22]	Q14160	Protein scribble homolog OS=Homo sapiens OX=9606 GN=SCRIB PE=1 SV=5	0.096	0.115	2.129	0.029	1.735	0.3	15.136	0.014	0.815	-3.37	-3.13	1.09	-5.11	0.79	-1.74	3.92	-6.2	-0.3	0.352305	0.966851	0.999983	0.155824	0.90915	0.991416	0.514029	0.121819	0.952993	117.6	11.3	13.5	250.3	3.4	203.9	87.21	74.49	146.66	82.78	65.7	19.56	217	119.7	13.5	16.7	11.6	1.9	9.8
TANLTGTDSPETDASASLQQNKSPR	1xPhospho [S23]	Q8TEW8	Partitioning defective 3 homolog B OS=Homo sapiens OX=9606 GN=PARD3B PE=1 SV=2	0.672	0.115	0.146	0.051	0.19	0.075	1.658	0.346	1.299	-0.57	-3.12	-2.77	-4.3	-2.39	-3.73	0.73	-1.53	0.38	0.995462	0.127231	0.168468	0.0449983	0.16197	0.101843	0.999984	0.959425	1	276	185.5	31.7	40.4	14	52.5	19.78	15.92	140.28	17.18	112.62	33.76	206.1	299.4	229.8	154.5	201	154	5.4
AGPTLTDENGDDLGLPPSPGDTSYYQDQVDDFHEAR	3xDeamidated [N9; Q26; Q28]; 1xPhospho [S/T/Y]	Q9NQZ2	Something about silencing protein 10 OS=Homo sapiens OX=9606 GN=UTP3 PE=1 SV=1	0.136	0.115	1.657	0.064	0.086	0.469	0.749	0.039	0.052	-2.88	-3.12	0.73	-3.97	-3.54	-1.09	-0.42	-4.7	-4.27	0.997906	0.873783	0.998926	0.902269	0.71604	0.988897	0.999397	0.735085	0.509136	196.2	26.7	22.5	325.1	12.5	16.9	127.38	151.26	33.6	88.2	158.13	50.18	536.5	4.3	118.9	289.2	16.2	10.5	20.7
GAPSPGVLGPHASEPQLAPPACTPAAPAVPGPPGPR	1xPhospho [S4]; 1xDeamidated [Q16]; 1xCarbamidomethyl [C22]	O96013	Serine/threonine-protein kinase PAK 4 OS=Homo sapiens OX=9606 GN=PAK4 PE=1 SV=1	1.091	0.115	0.231	0.129	1.027	0.118	8.944	0.559	4.447	0.13	-3.12	-2.11	-2.95	0.04	-3.08	3.16	-0.84	2.15	0.999921	0.443596	0.805231	0.691038	1	0.569167	0.428572	0.999918	0.790827	167	182.2	19.2	38.6	21.6	171.5	20.06	22.63	126.34	127.54	145.49	17.19	98	120.5	146.8	122.6	183.7	131.4	13.8
EEKDKDDQEWESPSPPKPTVFISGVIAR	1xPhospho [S14]	P51397	Death-associated protein 1 OS=Homo sapiens OX=9606 GN=DAP PE=1 SV=3	1.467	0.115	0.98	0.946	1.012	0.645	8.789	0.965	1.033	0.55	-3.12	-0.03	-0.08	0.02	-0.63	3.14	-0.05	0.05	0.999999	0.334143	0.999985	0.87446	0.866132	0.838446	0.903692	0.927528	0.921361	108.7	159.4	12.5	106.5	102.8	110	51.33	28.04	132.73	25.1	71.03	77.42	220.8	110.6	86.7	95.9	162.2	167.1	8.2
SAMPFTASPASSTTAR	1xPhospho [S8]	O00151	PDZ and LIM domain protein 1 OS=Homo sapiens OX=9606 GN=PDLIM1 PE=1 SV=4	0.995	0.115	0.8	0.699	0.442	0.702	3.826	0.873	0.552	-0.01	-3.12	-0.32	-0.52	-1.18	-0.51	1.94	-0.2	-0.86	0.999994	0.00216526	0.984154	0.962649	0.0432645	0.982284	0.496946	0.999988	0.126233	148.1	147.4	17.1	118.5	103.5	65.4	13.99	9.69	35.03	8.36	9.35	73.26	141.4	149.7	183.2	134.3	163.1	149	17.3
ESNRLSAPSYLAR	1xPhospho [S]	Q9H4B6	Protein salvador homolog 1 OS=Homo sapiens OX=9606 GN=SAV1 PE=1 SV=2	0.937	0.115	0.816	0.757	0.517	0.809	4.474	0.928	0.633	-0.09	-3.11	-0.29	-0.4	-0.95	-0.31	2.16	-0.11	-0.66	0.999929	0.116929	0.999784	0.999241	0.952518	0.992739	0.39749	0.999999	0.990276	144.8	135.7	16.7	118.3	109.7	74.8	30.48	8.98	132.32	16.14	14.95	25.15	81	153.1	135.4	145.5	123.5	126.8	15.6
DGDGVPGGGPLSPAR	1xPhospho [S12]	Q92888	Rho guanine nucleotide exchange factor 1 OS=Homo sapiens OX=9606 GN=ARHGEF1 PE=1 SV=2	0.185	0.116	0.279	0.337	0.298	1.816	2.58	1.205	1.067	-2.43	-3.11	-1.84	-1.57	-1.75	0.86	1.37	0.27	0.09	0.384372	0.603763	0.679623	0.724019	0.695836	0.987477	0.99998	0.999999	1	270.9	50.2	31.3	75.7	91.2	80.8	55.06	79.94	155.49	12.54	36.74	27.87	202.2	309.4	89	15.7	89.7	37.5	23.4
SLIPDIKPLAGQEAVVDLHADDSRISEDETERNGDDGTHDK	2xDeamidated [Q12; N33]; 1xPhospho [S/T]	Q9UKV3	Apoptotic chromatin condensation inducer in the nucleus OS=Homo sapiens OX=9606 GN=ACIN1 PE=1 SV=2	1.213	0.116	0.072	0.863	2.537	0.712	21.952	12.052	35.406	0.28	-3.11	-3.8	-0.21	1.34	-0.49	4.46	3.59	5.15	0.999999	0.874765	0.817862	0.902428	0.998503	0.870304	0.679675	0.999937	0.605495	103.4	125.5	12	7.4	89.3	262.4	76.8	77.66	138.95	168.21	131.76	53.6	58.6	49.6	182.8	212.8	71	53.6	74.3
FPDRLAEDEGDSEPEAVGQSR	1xPhospho [S12]	Q9UIG0	Tyrosine-protein kinase BAZ1B OS=Homo sapiens OX=9606 GN=BAZ1B PE=1 SV=2	4.257	0.116	0.644	5.175	0.782	1.216	6.763	8.039	1.215	2.09	-3.11	-0.64	2.37	-0.35	0.28	2.76	3.01	0.28	0.999387	0.245506	0.996925	0.999492	0.982676	1	0.562041	0.968247	0.999926	50.1	213.3	5.8	32.3	259.3	39.2	121.23	75.75	111.74	130.02	73.49	101.17	309.6	42.2	35.3	254.3	179.6	26.3	3.4
ETSFGSSENITMTSLSK	1xPhospho [S]; 1xDeamidated [N9]	Q9UMZ2	Synergin gamma OS=Homo sapiens OX=9606 GN=SYNRG PE=1 SV=2	0.096	0.116	2.304	1.067	0.143	11.068	1.237	0.463	0.062	-3.37	-3.11	1.2	0.09	-2.8	3.47	0.31	-1.11	-4.01	0.991164	0.997778	0.874673	0.999475	1	0.94293	0.998701	0.965852	0.855911	126.9	12.2	14.7	292.5	135.5	18.2	85.02	163.66	143.74	28.05	98.8	156.08	2.1	115.4	96.8	0.5	9.3	256.1	11.2
AATAARPPAPPPAPQPPSPTPSPPRPTLAR	1xDeamidated [Q15]; 2xPhospho [S18; S22]	Q96B36	Proline-rich AKT1 substrate 1 OS=Homo sapiens OX=9606 GN=AKT1S1 PE=1 SV=1	3.802	0.116	2.975	0.039	2.607	0.01	22.431	0.013	0.876	1.93	-3.1	1.57	-4.7	1.38	-6.63	4.49	-6.27	-0.19	0.562978	0.238447	0.985717	0.108102	0.770133	0.00644157	0.0284369	0.0376926	0.98064	56.9	216.5	6.6	169.4	2.2	148.4	109.2	10.09	65.26	86.2	123.27	11.53	55.2	184.9	9.7	210	227.1	185.4	2.5
EEPLDPEEAEGPLSLVTTANHSPDFDHDRDYEDEPVNEDME	1xPhospho [S/T]; 1xDeamidated [N20]	Q9H334	Forkhead box protein P1 OS=Homo sapiens OX=9606 GN=FOXP1 PE=1 SV=1	0.895	0.116	0.836	0.945	0.788	1.056	6.767	1.131	0.943	-0.16	-3.1	-0.26	-0.08	-0.34	0.08	2.76	0.18	-0.09	1	0.703148	0.861065	0.958616	0.965422	0.945344	0.983235	0.999508	0.999174	131	117.3	15.2	109.5	123.8	103.2	18.58	13.74	117.12	81.31	76.81	77.27	146.1	149.7	105.1	162.9	130.8	128.2	120
AMIVPSSPSKTPEEVSTPAEEEK	1xPhospho [S/T]	Q01484	Ankyrin-2 OS=Homo sapiens OX=9606 GN=ANK2 PE=1 SV=4	0.473	0.116	0.596	0.446	0.558	0.943	4.786	0.748	0.935	-1.08	-3.1	-0.75	-1.16	-0.84	-0.08	2.26	-0.42	-0.1	0.618621	0.682908	0.928207	0.954078	0.968536	0.970635	0.976515	0.999998	0.99997	188.1	89	21.9	112.2	83.9	104.9	24.8	88.53	139.19	78.27	63.26	70.42	136	202.2	226	131.9	1.2	95.6	186.9
FISKTPSKEEIEKECEDTSLR	1xPhospho [S7]; 1xCarbamidomethyl [C15]	Q9Y2K5	R3H domain-containing protein 2 OS=Homo sapiens OX=9606 GN=R3HDM2 PE=1 SV=3	0.715	0.117	0.416	0.59	0.31	0.826	2.649	1.419	0.745	-0.48	-3.1	-1.27	-0.76	-1.69	-0.28	1.41	0.51	-0.43	0.69033	0.0259629	0.672455	0.988795	0.616449	0.948547	0.324683	0.940695	0.999998	190.6	136.2	22.3	79.3	112.5	59	21.52	60.74	54.6	102.1	62.88	71.64	217.6	161.6	145.9	26	119.7	115.5	18.9
SGGSIDNVLSQIAAQRK	3xPhospho [S1; S4; S10]; 2xDeamidated [Q11; Q15]	Q68DC2	Ankyrin repeat and SAM domain-containing protein 6 OS=Homo sapiens OX=9606 GN=ANKS6 PE=1 SV=2	0.736	0.117	0.504	0.642	0.314	0.873	2.684	1.275	0.623	-0.44	-3.1	-0.99	-0.64	-1.67	-0.2	1.42	0.35	-0.68	0.993503	0.00162127	0.714956	0.837291	0.0810529	0.984617	0.241363	0.999859	0.586756	181.1	133.3	21.2	91.3	116.3	56.8	30.82	22.96	84.43	16.6	25.09	9.1	106	181.5	201	104.1	165.9	133.5	21.2
WTPPQDSGGREDIVYSVTCEQCWPESGECGPCEASVR	4xCarbamidomethyl [C19; C22; C29; C32]; 1xPhospho [S]	P29317	Ephrin type-A receptor 2 OS=Homo sapiens OX=9606 GN=EPHA2 PE=1 SV=2	0.081	0.117	0.131	0.155	0.072	1.907	0.612	1.18	0.547	-3.62	-3.09	-2.93	-2.69	-3.8	0.93	-0.71	0.24	-0.87	0.751756	0.986405	0.999403	0.910833	0.982161	0.999005	1	0.981782	0.999147	385.8	31.3	45.2	50.5	59.6	27.6	126	67.94	159.97	154.23	22.39	160	522.6	119.3	5.3	19.8	9.7	4.6	14
ALSQTVPSSGTNGVSLPADCTGAVPAASPDTAAWR	1xDeamidated [N/Q]; 1xCarbamidomethyl [C20]; 1xPhospho [S]	Q9H6Z4	Ran-binding protein 3 OS=Homo sapiens OX=9606 GN=RANBP3 PE=1 SV=1	1.442	0.118	1.707	0.152	1.709	0.105	14.532	0.089	1.001	0.53	-3.09	0.77	-2.72	0.77	-3.25	3.86	-3.49	0	0.870176	0.989416	0.748662	0.991554	0.990627	0.572585	0.840637	0.433035	0.965792	97.9	141.2	11.5	167.2	14.9	167.3	80.17	32.74	120.02	28.55	118.48	79.2	123.5	6.4	107.9	83.6	163.2	155.7	12.7
VSPPASPTLEVELGSAELPLQGAVGPELPPGGGHGR	2xPhospho [S2; S6]	Q7Z6J0	E3 ubiquitin-protein ligase SH3RF1 OS=Homo sapiens OX=9606 GN=SH3RF1 PE=1 SV=2	0.103	0.118	0.211	0.198	1.258	1.928	10.69	0.939	5.958	-3.28	-3.09	-2.24	-2.34	0.33	0.95	3.42	-0.09	2.57	0.97151	0.895999	0.967244	0.996375	1	0.999719	0.887076	0.99957	0.962798	207.8	21.4	24.4	43.9	41.2	261.3	85.27	153.84	3.78	141.55	135.79	80.78	253.8	13	160.4	5.2	267.7	16.5	19.7
SKPYEGSQRNSTELAPPLPVR	1xDeamidated [N10]; 1xPhospho [S11]	Q9H7D0	Dedicator of cytokinesis protein 5 OS=Homo sapiens OX=9606 GN=DOCK5 PE=1 SV=3	0.068	0.118	0.085	0.118	0.088	1.741	0.747	1.377	1.029	-3.89	-3.09	-3.55	-3.09	-3.51	0.8	-0.42	0.46	0.04	0.691596	0.973036	0.92579	0.994299	0.962878	0.926934	1	0.99767	0.999985	406.4	27.5	47.8	34.7	47.8	35.7	84.05	35.82	93.59	146.16	132.09	127.97	369.6	11.4	290.8	19.6	28.6	13.9	22.2
FSDEGDSDSALDSVSPCPSSPK	1xCarbamidomethyl [C17]; 1xPhospho [S]	Q96QB1	Rho GTPase-activating protein 7 OS=Homo sapiens OX=9606 GN=DLC1 PE=1 SV=4	1.147	0.118	0.237	0.523	0.518	0.456	4.39	2.204	2.186	0.2	-3.08	-2.08	-0.94	-0.95	-1.13	2.13	1.14	1.13	0.996669	0.214996	0.832902	0.816866	0.821246	0.968855	0.814758	1	1	169.4	194.2	20	40.1	88.5	87.8	81.39	91.16	117.39	148.03	24.55	62.24	87	351.3	105.5	288.9	26.9	121	12.5
SPSTTYLHTPTPSEDAAIPSK	1xPhospho [S/T/Y]	Q13111	Chromatin assembly factor 1 subunit A OS=Homo sapiens OX=9606 GN=CHAF1A PE=1 SV=3	0.797	0.118	1.008	0.058	0.946	0.072	8.007	0.057	0.939	-0.33	-3.08	0.01	-4.12	-0.08	-3.79	3	-4.13	-0.09	0.999939	0.983094	0.911619	0.98752	0.999709	0.95809	0.92822	0.607494	0.976362	152.8	121.8	18.1	154	8.8	144.6	91.34	90.33	34.85	28.92	148.77	76.25	241	150.7	3	216.8	8.8	120.1	17.8
IQFVEGPVEPGKPTSPEHVVYEGETVTR	1xDeamidated [Q2]; 1xPhospho [S/T]	Q9H7C4	Syncoilin OS=Homo sapiens OX=9606 GN=SYNC PE=1 SV=3	0.202	0.119	0.069	0.162	1.19	0.799	10.036	2.327	17.136	-2.31	-3.08	-3.85	-2.63	0.25	-0.32	3.33	1.22	4.1	0.99266	0.85084	0.271553	0.593971	1	0.878213	0.847718	0.984356	0.268848	218.8	44.2	25.9	15.2	35.4	260.4	64.22	123.83	138.2	102.47	77.08	78.61	206.2	226.9	41.5	41.7	284.4	25.4	7.8
GRLDSSEMDHSENEDYTMSSPLPGKK	1xPhospho [S]	Q9NTI5	Sister chromatid cohesion protein PDS5 homolog B OS=Homo sapiens OX=9606 GN=PDS5B PE=1 SV=1	0.562	0.119	1.083	0.877	0.437	1.559	3.685	0.809	0.404	-0.83	-3.08	0.12	-0.19	-1.19	0.64	1.88	-0.31	-1.31	0.677394	0.00394938	0.999998	0.999811	0.36938	0.812947	0.120517	0.999076	0.324906	147.1	82.7	17.5	159.4	129	64.3	17.73	22.18	106.21	10.5	16.26	15.83	145.8	120	171.7	82	96.1	60.9	6.4
LSPAYSLGSLTGASPCQSPCVQR	2xPhospho [S/T/Y]; 2xCarbamidomethyl [C16; C20]	Q86UU1	Pleckstrin homology-like domain family B member 1 OS=Homo sapiens OX=9606 GN=PHLDB1 PE=1 SV=1	1.2	0.119	0.765	1.316	1.258	1.097	10.594	1.72	1.644	0.26	-3.07	-0.39	0.4	0.33	0.13	3.41	0.78	0.72	0.853448	0.0642258	0.998201	0.99999	0.999999	0.787256	0.0551973	0.992808	0.99535	106	127.2	12.6	81.1	139.6	133.4	30.52	82.23	97.45	43.55	9.79	4.34	173.6	108.5	103.2	130.4	130.2	4.5	26.8
EWSLESSPAQNWTPPQPR	1xDeamidated [N/Q]; 1xPhospho [T13]	Q8N6T3	ADP-ribosylation factor GTPase-activating protein 1 OS=Homo sapiens OX=9606 GN=ARFGAP1 PE=1 SV=2	1.029	0.119	0.227	0.223	1.041	0.217	8.763	0.982	4.578	0.04	-3.07	-2.14	-2.16	0.06	-2.2	3.13	-0.03	2.19	0.997605	0.55408	0.725544	0.38173	0.999999	0.615031	0.504125	0.986717	0.67574	164.9	169.6	19.6	37.5	36.8	171.6	9.13	76.7	138.66	134	14.79	22.28	148.1	126.1	127.7	131.4	28.7	226.2	191.4
QPLEQNQTISPLSTYEESK	1xDeamidated [N/Q]; 1xPhospho [S/T]	Q9UQR1	Zinc finger protein 148 OS=Homo sapiens OX=9606 GN=ZNF148 PE=1 SV=2	0.915	0.119	0.972	0.97	1.357	1.06	11.411	0.997	1.395	-0.13	-3.07	-0.04	-0.04	0.44	0.08	3.51	0	0.48	0.999963	0.975791	0.999585	0.996726	0.901427	0.985021	0.532591	0.99998	0.975083	112.5	103	13.4	109.4	109.1	152.6	88.52	73.79	144.1	50.62	43.11	8.91	198.8	111	10.1	101.6	114.7	11.7	13.2
EKLQEEGGGSDEEETGSPSEDGMQSAR	1xPhospho [S/T]; 1xOxidation [M23]	Q13610	Periodic tryptophan protein 1 homolog OS=Homo sapiens OX=9606 GN=PWP1 PE=1 SV=1	0.151	0.119	1.098	0.661	0.697	4.381	5.839	0.602	0.635	-2.73	-3.07	0.13	-0.6	-0.52	2.13	2.55	-0.73	-0.66	0.280102	0.0874548	0.988904	0.945816	0.991301	0.733611	0.213227	0.999736	1	161	24.3	19.2	176.8	106.5	112.2	10.58	121.43	90.15	72.33	58.82	30.18	195.1	170	159.1	25.7	118.4	5.1	41
KQISGQYSGSPQLLK	1xPhospho [S/Y]	Q96N67	Dedicator of cytokinesis protein 7 OS=Homo sapiens OX=9606 GN=DOCK7 PE=1 SV=4	1.079	0.12	0.653	0.644	0.104	0.597	0.865	0.986	0.159	0.11	-3.06	-0.62	-0.64	-3.27	-0.74	-0.21	-0.02	-2.66	0.999999	0.0178448	0.804361	0.947465	0.00853083	0.925437	0.997374	0.998617	0.0698575	166.7	179.9	20	108.8	107.3	17.3	8.68	10.69	120.78	36.37	5.21	9.24	152.7	181.7	170.1	183.5	189.4	154.3	20.4
SISQDSLDELSMEDYWIELENIKK	1xDeamidated [Q4]; 1xPhospho [S/Y]	Q8N392	Rho GTPase-activating protein 18 OS=Homo sapiens OX=9606 GN=ARHGAP18 PE=1 SV=3	1.594	0.12	1.714	1.886	2.713	1.183	22.636	1.1	1.583	0.67	-3.06	0.78	0.92	1.44	0.24	4.5	0.14	0.66	0.547304	0.651274	0.404817	0.400127	0.274036	0.999725	0.0233211	1	0.999606	66.5	106	8	113.9	125.3	180.4	68.67	6.23	128.37	17.76	21.51	36.76	11	76.3	68.6	99.7	112.5	109.3	70.3
TATYNGPPASPSLSHEATPLSQTR	1xDeamidated [N5]; 1xPhospho [S10]	P27448	MAP/microtubule affinity-regulating kinase 3 OS=Homo sapiens OX=9606 GN=MARK3 PE=1 SV=5	1.211	0.12	0.184	0.179	0.062	0.148	0.521	0.974	0.34	0.28	-3.06	-2.44	-2.48	-4	-2.76	-0.94	-0.04	-1.56	0.950168	0.00873127	0.0346796	0.046585	0.00270564	0.185435	0.976226	0.99997	0.650959	217.6	263.6	26.1	40	39	13.6	11.72	69.2	32.82	42.72	15.22	81.75	273.8	245.4	216.3	307.9	297.3	43.6	35.9
RFSDFLGLHSK	1xPhospho [S3]	O60749	Sorting nexin-2 OS=Homo sapiens OX=9606 GN=SNX2 PE=1 SV=2	0.067	0.12	0.064	0.108	0.051	1.624	0.426	1.691	0.8	-3.91	-3.06	-3.97	-3.21	-4.29	0.7	-1.23	0.76	-0.32	0.656729	0.771291	0.796931	0.726989	0.106474	0.999994	0.623036	0.999992	0.594079	425.5	28.4	51.1	27.2	46.1	21.8	14.32	152.38	115.98	136.84	147.84	86.43	207.1	265.6	271.2	17.7	4.2	249.4	31.9
LPEEWSQWLGGSSWPGYVRPLPPAAIESPAVAAPAYSR	1xDeamidated [Q7]; 1xPhospho [S]	P04792	Heat shock protein beta-1 OS=Homo sapiens OX=9606 GN=HSPB1 PE=1 SV=2	0.095	0.121	0.715	2.501	2.268	26.258	18.82	3.497	3.171	-3.39	-3.05	-0.48	1.32	1.18	4.71	4.23	1.81	1.67	0.360242	0.264501	0.941966	0.947737	0.893318	0.0998235	0.0509357	0.524773	0.428215	89.6	8.5	10.8	64	224	203.1	71.01	134.81	113.47	92.67	32.81	29.15	34.3	165.8	81.4	2.4	57.5	7.7	1.6
METMASPGKDNYR	1xAcetyl [N-Term]; 1xOxidation [M4]; 1xPhospho [S6]	O60684	Importin subunit alpha-7 OS=Homo sapiens OX=9606 GN=KPNA6 PE=1 SV=1	0.75	0.121	0.193	0.646	0.571	0.861	4.732	3.346	2.956	-0.41	-3.05	-2.37	-0.63	-0.81	-0.22	2.24	1.74	1.56	0.999999	0.484298	0.569501	0.997155	0.99762	0.993543	0.727613	0.814955	0.806906	182.9	137.2	22.1	35.3	118.2	104.4	60.93	16.66	119.43	104.53	51.94	30.67	164.3	225	49.5	123.3	113.1	154.7	149.4
YSSSGSPANSFHFK	2xPhospho [S4; S]	O00418	Eukaryotic elongation factor 2 kinase OS=Homo sapiens OX=9606 GN=EEF2K PE=1 SV=2	0.914	0.121	1.233	1.532	0.212	1.676	1.757	1.242	0.172	-0.13	-3.05	0.3	0.62	-2.24	0.75	0.81	0.31	-2.54	1	0.0732886	0.999758	0.989286	0.114565	0.986107	0.999726	0.999344	0.074117	119.7	109.4	14.5	147.6	183.4	25.4	1.7	13.27	127.04	11.99	14.05	82.46	114.7	118.6	116.4	132.3	105.4	106.4	14.1
QSLGHPPPEPGPDRVADAKGDSESEEDEDLEVPVPSR	2xPhospho [S22; S]	P13861	cAMP-dependent protein kinase type II-alpha regulatory subunit OS=Homo sapiens OX=9606 GN=PRKAR2A PE=1 SV=2	0.109	0.121	0.011	0.014	1.116	0.128	9.232	1.244	99.603	-3.2	-3.05	-6.48	-6.16	0.16	-2.96	3.21	0.32	6.64	0.616506	0.98225	0.0645712	0.114999	0.999846	0.801396	0.935675	0.999069	0.0429235	253.1	27.5	30.6	2.8	3.5	282.4	91.64	60.23	155.95	54.69	142.88	86.76	194.2	15.4	368.6	21.1	24.3	5.3	23.5
EALHTAGYEMSLNGSPR	1xPhospho [S15]	O94929	Actin-binding LIM protein 3 OS=Homo sapiens OX=9606 GN=ABLIM3 PE=1 SV=3	0.76	0.121	0.26	0.034	1.124	0.045	9.298	0.131	4.319	-0.4	-3.05	-1.94	-4.87	0.17	-4.48	3.22	-2.93	2.11	0.985777	0.875682	0.999996	0.453625	0.997709	0.192043	0.660151	0.395082	0.999489	181.9	138.2	22	47.3	6.2	204.4	88.67	66.04	53.74	113.67	81.51	77.35	4.4	276	189	243.7	50.8	143.6	22.8
MEDPFEEADQPTTEPGMVLDSVEAGDTTPPTKR	1xAcetyl [N-Term]; 1xPhospho [T]	Q8IZ21	Phosphatase and actin regulator 4 OS=Homo sapiens OX=9606 GN=PHACTR4 PE=1 SV=1	0.344	0.122	0.303	0.384	0.718	1.114	5.893	1.265	2.366	-1.54	-3.04	-1.72	-1.38	-0.48	0.16	2.56	0.34	1.24	0.841092	0.235086	0.366107	0.697423	0.92253	0.999701	0.712214	0.98831	0.871239	209	72	25.5	63.4	80.2	150	137.17	72.86	130.96	114.6	42.39	43.92	929.2	48.9	101.7	106.5	32	35	12.4
TDPPAVNGASLGPSISEPDLTSVK	1xPhospho [S16]	Q15678	Tyrosine-protein phosphatase non-receptor type 14 OS=Homo sapiens OX=9606 GN=PTPN14 PE=1 SV=2	0.21	0.122	0.382	0.23	0.475	1.097	3.894	0.603	1.244	-2.25	-3.03	-1.39	-2.12	-1.07	0.13	1.96	-0.73	0.32	0.491453	0.544676	0.987393	0.350492	0.998143	0.999703	0.773858	0.684262	0.999926	248	52.1	30.3	94.7	57.1	117.8	52.36	88.89	115.73	32.05	84.16	78.13	246.6	86.1	295.9	89.5	3.8	51.8	6.4
MVDYSVWDHIEVSDDEDETHPNIDTASLFR	1xAcetyl [N-Term]; 1xPhospho [S/T]; 1xDeamidated [N22]	Q16543	Hsp90 co-chaperone Cdc37 OS=Homo sapiens OX=9606 GN=CDC37 PE=1 SV=1	1.952	0.122	1.51	1.513	1.637	0.775	13.366	1.001	1.084	0.96	-3.03	0.6	0.6	0.71	-0.37	3.74	0	0.12	0.844011	0.960849	0.928153	0.999879	0.999994	0.929796	0.930047	0.977406	0.959535	77.6	151.4	9.5	117.2	117.3	127	74.65	28.24	141.17	11.36	77.96	80.39	11.2	110.5	86.6	111.3	169.1	200.6	10.6
ELVGDTGSQEGDHEPSGSETEEDTSSSPHR	1xDeamidated [Q9]; 1xPhospho [S/T]	P0DJ93	Small integral membrane protein 13 OS=Homo sapiens OX=9606 GN=SMIM13 PE=3 SV=1	0.277	0.123	1.508	1.465	0.19	5.296	1.548	0.971	0.126	-1.85	-3.03	0.59	0.55	-2.4	2.4	0.63	-0.04	-2.99	0.989448	0.0851494	0.937431	0.891354	0.697237	0.587358	0.622323	0.999989	0.243737	131.5	36.4	16.1	198.4	192.7	25	65.45	112.71	57.32	17.32	14.68	117.31	116.4	172.4	32.9	207.2	30.7	32.2	5.5
ALEAASLSQHPPSLCISDSEEEEEER	1xDeamidated [Q9]; 1xCarbamidomethyl [C15]; 2xPhospho [S17; S19]	O43159	Ribosomal RNA-processing protein 8 OS=Homo sapiens OX=9606 GN=RRP8 PE=1 SV=2	0.053	0.123	0.091	0.124	0.11	2.343	0.899	1.372	1.215	-4.23	-3.03	-3.46	-3.01	-3.18	1.23	-0.15	0.46	0.28	0.633201	0.929245	0.640702	0.988048	0.610614	0.923875	0.982251	0.927766	1	399.7	21.2	49	36.3	49.7	44.1	77.4	59.94	140.21	71.5	145.72	121.89	27.2	360.1	301.1	16	32	9.7	6.1
SSSEITLSECDAEDAGEPR	1xPhospho [S]; 1xCarbamidomethyl [C10]	O60292	Signal-induced proliferation-associated 1-like protein 3 OS=Homo sapiens OX=9606 GN=SIPA1L3 PE=1 SV=3	1.074	0.123	0.093	1.089	0.881	1.014	7.163	11.71	9.466	0.1	-3.02	-3.43	0.12	-0.18	0.02	2.84	3.55	3.24	1	0.601046	0.711245	0.999187	0.997435	0.999406	0.367166	0.878559	0.464577	140.8	151.3	17.3	13.1	153.4	124	69.27	68.25	8.57	144.01	80.3	10.61	27	192.5	160.6	172.6	173.3	26.3	21.7
LRPQSAQSSFPPSPGPSPDVQLATLAQR	1xDeamidated [Q]; 1xPhospho [S13]	Q9Y679	Lipid droplet-regulating VLDL assembly factor AUP1 OS=Homo sapiens OX=9606 GN=AUP1 PE=1 SV=2	0.083	0.123	0.107	0.049	0.1	0.593	0.814	0.459	0.94	-3.6	-3.02	-3.23	-4.35	-3.32	-0.75	-0.3	-1.12	-0.09	0.948179	0.992403	0.99956	0.901943	0.706679	0.999983	0.943503	0.975814	0.858402	410.5	33.9	50.6	43.8	20.1	41.2	82.4	158.47	134.39	144.17	64.64	85.29	282.3	9.3	282.1	23.3	401.8	1.2	227.8
AGAASPLNSPLSSAVPSLGK	1xPhospho [S5]	O75962	Triple functional domain protein OS=Homo sapiens OX=9606 GN=TRIO PE=1 SV=2	0.054	0.123	0.058	0.104	0.128	1.934	1.037	1.771	2.187	-4.22	-3.02	-4.1	-3.27	-2.97	0.95	0.05	0.82	1.13	0.079153	0.382241	0.0674197	0.440256	0.486978	0.842206	0.999938	0.796119	0.750797	409.1	21.9	50.4	23.9	42.3	52.3	75.92	45.63	42.99	102.65	26.41	28.39	513.6	540.8	45.6	34.1	27.5	12.2	71.7
DRPVSQPSLVGSK	1xPhospho [S]	Q9H4A3	Serine/threonine-protein kinase WNK1 OS=Homo sapiens OX=9606 GN=WNK1 PE=1 SV=2	0.91	0.124	1.197	1.18	0.206	1.297	1.661	0.986	0.172	-0.14	-3.01	0.26	0.24	-2.28	0.38	0.73	-0.02	-2.54	0.99655	9.0439e-05	0.992883	0.999849	0.0136467	0.977137	0.0550347	0.999568	0.00550467	130	118.2	16.1	155.6	153.4	26.7	20.73	7.2	42.85	3.81	15.08	78.14	107.4	161.6	127.6	119.6	116.1	104.1	15.8
LREELSEAMSEVEGLEANEGSKTLQR	1xDeamidated [N18]; 1xPhospho [T23]	Q99418	Cytohesin-2 OS=Homo sapiens OX=9606 GN=CYTH2 PE=1 SV=2	1.702	0.124	0.199	0.187	0.108	0.11	0.872	0.938	0.542	0.77	-3.01	-2.33	-2.42	-3.21	-3.19	-0.2	-0.09	-0.88	1	0.877408	0.798291	0.336558	0.285005	0.336209	0.84616	0.948635	0.914084	180.7	307.6	22.4	36	33.8	19.5	86.54	86.92	150.04	49.33	77.28	76.67	352.3	154.6	40.3	263.2	429.9	19.4	19.2
LCLSTVDLEVK	1xCarbamidomethyl [C2]; 1xPhospho [S/T]	Q8N370	Large neutral amino acids transporter small subunit 4 OS=Homo sapiens OX=9606 GN=SLC43A2 PE=1 SV=1	0.306	0.124	0.28	0.079	1.016	0.257	8.189	0.281	3.624	-1.71	-3.01	-1.83	-3.67	0.02	-1.96	3.03	-1.83	1.86	0.992578	0.974958	0.999543	0.793326	0.97855	0.975116	0.713863	0.919519	0.90793	213.9	65.4	26.5	60	16.8	217.3	91.66	43.14	121.88	112.7	158.9	19.7	289.3	158.6	9.8	22.1	48.5	57.5	12.7
SSVKTPEPVVPTAPELQPSTSTDQPVTSEPTSQVTR	1xPhospho [S/T]; 2xDeamidated [Q17; Q24]	Q14676	Mediator of DNA damage checkpoint protein 1 OS=Homo sapiens OX=9606 GN=MDC1 PE=1 SV=3	0.099	0.125	0.152	0.02	0.098	0.199	0.785	0.129	0.645	-3.34	-3	-2.72	-5.67	-3.35	-2.33	-0.35	-2.95	-0.63	0.953781	0.811861	0.811545	0.101041	0.758024	0.35164	0.999998	0.558466	0.999998	402.1	39.6	50.1	61	7.9	39.3	78.32	155.61	22.35	33.21	139.42	39.02	28.3	390.9	310.1	601.4	13.3	30.5	34.6
AASQGSDSPLLPAQR	1xPhospho [S]	Q5TCZ1	SH3 and PX domain-containing protein 2A OS=Homo sapiens OX=9606 GN=SH3PXD2A PE=1 SV=1	1.06	0.125	0.421	0.245	0.583	0.231	4.652	0.581	1.384	0.08	-3	-1.25	-2.03	-0.78	-2.12	2.22	-0.78	0.47	0.999808	0.00398554	0.143289	0.00613049	0.566611	0.00937009	0.0663014	0.448603	0.89844	174.8	185.2	21.9	73.6	42.8	101.8	23.46	16.54	77.16	27.04	59.4	38.41	249.8	170.8	169	181	200.9	143.8	57.1
LSIMTSENHLNNSDKEVDEVDAALSDLEITLEGGK	1xDeamidated [N]; 1xPhospho [S]	Q96AC1	Fermitin family homolog 2 OS=Homo sapiens OX=9606 GN=FERMT2 PE=1 SV=1	0.095	0.125	0.91	11.166	12.903	117.925	103.026	12.268	14.177	-3.4	-3	-0.14	3.48	3.69	6.88	6.69	3.62	3.83	0.643024	0.983912	0.999191	0.877594	0.862356	0.161648	0.512187	0.710094	0.689121	22.9	2.2	2.9	20.8	255.7	295.5	142.25	116.82	166.92	54.22	82.54	90.98	181.6	4.7	20.3	1.3	11.5	1.9	2.3
NSCQDSEADEETSPGFDEQEDGSSSQTANKPSR	1xCarbamidomethyl [C3]; 1xDeamidated [N/Q]; 1xPhospho [S/T]	Q86W56	Poly(ADP-ribose) glycohydrolase OS=Homo sapiens OX=9606 GN=PARG PE=1 SV=1	0.701	0.126	1.168	0.978	0.428	1.395	3.408	0.837	0.367	-0.51	-2.99	0.22	-0.03	-1.22	0.48	1.77	-0.26	-1.45	0.999941	0.0991207	1	1	0.612089	0.999713	0.758015	1	0.585239	136.3	95.6	17.1	159.2	133.3	58.4	68.63	58.98	89.4	52.38	43.14	67.17	149.6	43.2	242	104.9	52.4	186.5	18.8
SVSIQNITGVGNDENMSNTWK	1xPhospho [S3]	Q12802	A-kinase anchor protein 13 OS=Homo sapiens OX=9606 GN=AKAP13 PE=1 SV=2	1.137	0.126	1.189	0.981	0.039	0.862	0.312	0.825	0.033	0.19	-2.99	0.25	-0.03	-4.67	-0.21	-1.68	-0.28	-4.92	0.845916	0.861265	0.992208	0.998634	0.280834	0.965979	0.8587	0.999972	0.121869	134.2	152.6	16.9	159.5	131.6	5.3	81.04	8.61	33.74	75.55	75.88	113.17	7.2	160.2	166.5	182.2	166.2	197.5	20.1
STSSTSSGSNSNALVPVSWK	1xPhospho [S3]; 1xDeamidated [N]	O94915	Protein furry homolog-like OS=Homo sapiens OX=9606 GN=FRYL PE=1 SV=2	0.358	0.126	0.294	0.887	0.59	2.474	4.691	3.015	2.008	-1.48	-2.99	-1.77	-0.17	-0.76	1.31	2.23	1.59	1.01	0.510544	0.0403482	0.651919	0.936317	0.999757	0.946743	0.0631995	0.987088	0.797665	184.3	66.1	23.2	54.2	163.4	108.8	73.84	81.13	86.57	69.39	50.83	110.41	86.2	338.5	126.2	106.1	45.3	17	35.2
APVSSTESVIQSNTPTPPPSQPLNETAEEESR	1xPhospho [T16]	Q9HC35	Echinoderm microtubule-associated protein-like 4 OS=Homo sapiens OX=9606 GN=EML4 PE=1 SV=3	0.115	0.126	0.995	0.806	1.071	7.03	8.471	0.81	1.077	-3.13	-2.98	-0.01	-0.31	0.1	2.81	3.08	-0.3	0.11	0.556995	0.26516	0.96444	0.977112	1	0.912884	0.29437	0.999999	0.976673	145.9	16.7	18.4	145.2	117.5	156.3	30.25	127.3	132.63	69.56	85.67	7.25	204.3	133.2	118.2	15.3	138	14.4	16.8
SVTPDSLGHTPPARGEEELSNYICMGGK	1xPhospho [S/T/Y]; 1xCarbamidomethyl [C24]	P35568	Insulin receptor substrate 1 OS=Homo sapiens OX=9606 GN=IRS1 PE=1 SV=1	0.25	0.126	0.204	0.36	0.51	1.438	4.033	1.764	2.501	-2	-2.98	-2.29	-1.48	-0.97	0.52	2.01	0.82	1.32	0.493502	0.377039	0.483847	0.755589	0.629508	0.996566	0.996546	0.995914	0.9998	244.9	61.3	31	49.9	88.1	124.9	52.65	81	78.04	65.59	85.3	75.35	350.7	104.3	251.3	62.9	123	14.8	22.5
LEAVTARSFEEEGEHLGSR	1xPhospho [S/T]	Q9BXW6	Oxysterol-binding protein-related protein 1 OS=Homo sapiens OX=9606 GN=OSBPL1A PE=1 SV=2	0.842	0.127	0.879	0.932	0.128	1.107	1.012	1.06	0.146	-0.25	-2.98	-0.19	-0.1	-2.96	0.15	0.02	0.08	-2.78	0.998731	0.992412	0.995396	0.898965	0.997362	0.984057	0.999997	0.993513	0.929327	153.5	129.3	19.4	135	143.1	19.7	83.07	67.78	120.36	77.54	16.11	129.78	155.2	5	172.9	22.8	150	130.7	19.7
SQSGTLDGESAAWSASGEDSR	1xPhospho [S/T]	P49815	Tuberin OS=Homo sapiens OX=9606 GN=TSC2 PE=1 SV=2	0.811	0.127	0.716	0.562	0.107	0.693	0.842	0.786	0.149	-0.3	-2.98	-0.48	-0.83	-3.23	-0.53	-0.25	-0.35	-2.74	0.999646	0.192866	0.601093	0.929676	0.0461425	0.984851	0.942417	0.980078	0.508204	180.6	146.4	22.9	129.2	101.5	19.3	13.66	1.07	120.98	75.41	24.49	41.55	199.5	180.9	151.4	147.8	146.7	144.7	13.3
TGEPSPPHDILHEPPDVVSDDEKDHGKK	2xPhospho [S5; S19]	Q15311	RalA-binding protein 1 OS=Homo sapiens OX=9606 GN=RALBP1 PE=1 SV=3	0.147	0.127	1.147	0.998	0.929	6.789	7.315	0.87	0.81	-2.77	-2.98	0.2	0	-0.11	2.76	2.87	-0.2	-0.3	0.985987	0.999997	0.690432	0.74286	0.753474	0.393473	0.694726	0.999999	0.999996	138	20.3	17.5	158.3	137.7	128.2	86.51	86.93	128.82	7.47	12.35	27.76	151.7	137.9	0.4	30.8	1	20.3	98.3
FVQDHFDHNISPTIGASFMTK	1xDeamidated [N9]; 1xPhospho [S11]	Q13636	Ras-related protein Rab-31 OS=Homo sapiens OX=9606 GN=RAB31 PE=1 SV=2	1.343	0.127	0.175	1.148	0.099	0.855	0.777	6.575	0.565	0.43	-2.98	-2.52	0.2	-3.34	-0.23	-0.36	2.72	-0.82	0.999984	0.713868	0.93242	0.994296	0.497484	0.998906	0.99866	0.702231	0.944391	154.2	207.1	19.6	26.9	177	15.2	69.46	71.23	142.39	133.56	23.28	58.49	193.2	27.2	156	209.5	27.8	225.9	166.5
RESAASGLGGLLEEEGAGAGAAQEEVLEPGR	1xPhospho [S]	Q9C0C2	182 kDa tankyrase-1-binding protein OS=Homo sapiens OX=9606 GN=TNKS1BP1 PE=1 SV=4	0.726	0.127	0.292	0.627	0.812	0.863	6.391	2.144	2.778	-0.46	-2.98	-1.77	-0.67	-0.3	-0.21	2.68	1.1	1.47	0.999976	0.352176	0.405109	0.980367	0.999887	0.994405	0.466424	0.781976	0.527209	167.4	121.6	21.3	48.9	104.9	135.9	121.36	131.58	112.5	87.59	141.8	111.54	401.1	45.2	54.9	36.5	400.3	39.9	7
KIEEAMDGSETPQLFTVLPEKR	1xPhospho [T11]	Q13435	Splicing factor 3B subunit 2 OS=Homo sapiens OX=9606 GN=SF3B2 PE=1 SV=2	1.131	0.127	2.436	3.712	0.667	3.283	5.249	1.524	0.274	0.18	-2.98	1.28	1.89	-0.58	1.71	2.39	0.61	-1.87	0.99965	0.618563	0.999948	0.995694	0.999191	0.999943	0.806136	0.98034	0.999987	66.1	74.8	8.4	161.1	245.5	44.1	84.08	108.98	67.34	83.7	83.32	49	23.1	67.5	161.5	76.3	306.9	27.5	7.3
SAAEMYGSVTEHPSPSPLLSSSFDLDYDFQR	1xPhospho [S/T/Y]; 1xDeamidated [Q30]	P07910	Heterogeneous nuclear ribonucleoproteins C1/C2 OS=Homo sapiens OX=9606 GN=HNRNPC PE=1 SV=4	1.45	0.127	1.5	0.242	4.606	0.167	36.204	0.162	3.071	0.54	-2.97	0.59	-2.04	2.2	-2.58	5.18	-2.63	1.62	0.980096	0.564768	0.981022	0.964014	0.808818	0.683933	0.101932	0.688173	0.991758	67.2	97.5	8.6	100.8	16.3	309.6	74.64	10.5	143.82	8.53	141.08	60.96	70.1	108.4	13.5	117.8	96.7	101.7	0.4
KQQHVISTEEGDMMETNSTDDEKSTAK	2xPhospho [S/T]	Q9H0E3	Histone deacetylase complex subunit SAP130 OS=Homo sapiens OX=9606 GN=SAP130 PE=1 SV=1	0.532	0.127	0.898	0.844	1.112	1.585	8.731	0.94	1.238	-0.91	-2.97	-0.16	-0.25	0.15	0.66	3.13	-0.09	0.31	0.946319	0.0165282	0.998043	1	0.997446	0.958486	0.00794421	0.998998	0.951517	133	70.8	16.9	119.4	112.2	147.8	4.67	68.9	83.04	29.91	33.76	97.87	114.5	112.3	104.7	29.8	126.8	59.7	14.3
VVQDFIDIFSDYANFK	1xPhospho [S/Y]	P23469	Receptor-type tyrosine-protein phosphatase epsilon OS=Homo sapiens OX=9606 GN=PTPRE PE=1 SV=1	0.027	0.127	0.2	0.193	0.196	7.042	1.539	0.962	0.979	-5.19	-2.97	-2.32	-2.38	-2.35	2.82	0.62	-0.06	-0.03	0.567907	0.834238	1	0.991981	1	0.864151	0.866938	0.99483	1	344.1	9.4	43.8	68.9	66.3	67.5	105.42	126.35	79.02	142.05	26.22	86.82	543.3	225.1	3.6	6.2	41.9	3.1	4
IQEQESSGEEDSDLSPEER	1xPhospho [S]	P41236	Protein phosphatase inhibitor 2 OS=Homo sapiens OX=9606 GN=PPP1R2 PE=1 SV=2	0.804	0.128	0.832	0.963	0.367	1.197	2.876	1.158	0.442	-0.31	-2.97	-0.27	-0.05	-1.44	0.26	1.52	0.21	-1.18	0.91992	0.103225	0.998731	0.998939	0.80482	0.764123	0.573903	0.972537	0.946036	146.5	117.9	18.7	121.9	141.2	53.8	50.43	72.01	43.49	58.11	6.15	79.97	155.3	197.2	61.3	124.9	148.8	17.5	33.4
NQLETAPPHELK	1xDeamidated [N/Q]; 1xPhospho [T5]	Q9UPU5	Ubiquitin carboxyl-terminal hydrolase 24 OS=Homo sapiens OX=9606 GN=USP24 PE=1 SV=3	0.659	0.128	0.816	0.155	0.284	0.235	2.22	0.19	0.348	-0.6	-2.97	-0.29	-2.69	-1.82	-2.09	1.15	-2.4	-1.52	0.996749	0.160034	0.999894	0.668384	0.762981	0.893797	0.775179	0.791195	0.869788	197.2	130	25.2	160.9	30.6	56	28.3	73.63	136.58	13.73	100.75	16.07	223.1	170.9	125.2	112.6	47.6	241.3	0.9
RVEELQYMGDESSANSSSDPESNPTSPMAGR	1xDeamidated [N15]; 1xPhospho [S/T]	Q9BRS8	La-related protein 6 OS=Homo sapiens OX=9606 GN=LARP6 PE=1 SV=1	0.734	0.128	0.844	0.074	0.081	0.101	0.632	0.088	0.096	-0.45	-2.97	-0.24	-3.75	-3.63	-3.31	-0.66	-3.51	-3.38	0.511495	0.744773	0.999994	0.437062	0.478388	0.999991	0.996299	0.506204	0.549896	209.7	153.9	26.8	177.1	15.6	17	25.99	86.44	116.49	11.11	29.78	57.89	224.1	268.6	156.9	0.2	169.9	164.4	28.7
TGSSLLKEEEEDGQEGSIHNLPLVTSQRPFYDGPMPTPR	3xDeamidated [Q14; N20; Q27]; 1xPhospho [S17]	O75717	WD repeat and HMG-box DNA-binding protein 1 OS=Homo sapiens OX=9606 GN=WDHD1 PE=1 SV=1	1.367	0.128	0.217	0.147	0.199	0.108	1.556	0.677	0.918	0.45	-2.97	-2.2	-2.77	-2.33	-3.22	0.64	-0.56	-0.12	0.999991	0.880561	0.996505	0.974163	0.990824	0.989558	0.995088	0.99978	0.999997	196.2	268.2	25.1	42.6	28.8	39.1	91.35	88.53	152.98	117.58	147.64	139.8	263.8	116.1	21.3	260.2	158.8	9.1	205
NGSLDSPGKQDTEEDEEEDEKDKGK	2xDeamidated [N1; Q10]; 1xPhospho [S/T]	Q9Y266	Nuclear migration protein nudC OS=Homo sapiens OX=9606 GN=NUDC PE=1 SV=1	0.28	0.128	1.121	0.879	0.771	3.14	6.018	0.784	0.688	-1.84	-2.96	0.16	-0.19	-0.38	1.65	2.59	-0.35	-0.54	0.999959	0.998771	0.976841	0.999037	0.975603	0.993043	0.874396	0.999046	1	143.6	40.2	18.4	160.9	126.2	110.7	84.53	138.09	129.66	60.86	72.16	8.61	170.8	4.8	133.6	269	5.8	37.4	17.1
YKLDEDEDEDDADLSKYNLDASEEEDSNKK	1xPhospho [S22]	O95218	Zinc finger Ran-binding domain-containing protein 2 OS=Homo sapiens OX=9606 GN=ZRANB2 PE=1 SV=2	0.013	0.129	0.84	0.941	0.035	71.323	0.275	1.119	0.042	-6.24	-2.96	-0.25	-0.09	-4.82	6.16	-1.86	0.16	-4.57	0.0266484	0.509197	0.999436	1	0.486	0.024767	1	0.998958	0.666722	202.8	2.7	26.1	170.5	190.8	7.2	42.04	99.99	130.21	64.42	50.46	158.43	211.4	200.1	85.5	0.3	6.7	2.6	25.7
VWEDRPSSAGSTPFPYNPLIMR	1xPhospho [S]	Q9Y618	Nuclear receptor corepressor 2 OS=Homo sapiens OX=9606 GN=NCOR2 PE=1 SV=3	0.649	0.129	1.471	1.131	0.49	1.743	3.801	0.769	0.333	-0.62	-2.96	0.56	0.18	-1.03	0.8	1.93	-0.38	-1.59	0.926407	0.602961	0.963683	0.95353	0.999803	0.507374	0.747652	1	0.892172	123.2	79.9	15.9	181.3	139.3	60.3	51.79	82.77	146.17	85.16	95.1	66.84	28.7	96.7	84.9	69.3	2.7	55.1	1
VDSSTNSSPSPQQSESLSPAHTSDFR	1xPhospho [S18]	Q9BQE9	B-cell CLL/lymphoma 7 protein family member B OS=Homo sapiens OX=9606 GN=BCL7B PE=1 SV=1	3.803	0.129	3.479	3.551	3.771	0.934	29.247	1.021	1.084	1.93	-2.96	1.8	1.83	1.92	-0.1	4.87	0.03	0.12	0.744507	0.888339	0.954505	0.819297	0.953464	0.999987	0.446173	0.998623	1	38.1	145	4.9	132.7	135.4	143.8	128.07	18.67	160.84	48.61	32.58	69.08	190.9	7.4	34	172.4	129.4	124.1	3.1
SATRPSPSPERSSTGPEPPAPTPLLAER	2xPhospho [S6; S8]	Q9UQ35	Serine/arginine repetitive matrix protein 2 OS=Homo sapiens OX=9606 GN=SRRM2 PE=1 SV=2	0.096	0.129	0.016	0.054	0.69	0.566	5.341	3.378	42.889	-3.38	-2.95	-5.96	-4.2	-0.53	-0.82	2.42	1.76	5.42	0.906519	0.997711	0.354477	0.8211	0.985335	0.999929	0.88513	0.946874	0.140247	302.1	29	39	4.9	16.4	208.5	87.04	38.52	128.86	139.79	74.53	115.18	240.3	4.1	315.3	23.1	26.2	11.4	31.1
QAFSMYEPGSALKPFGGPPGDELTTR	1xPhospho [S/Y]	Q9Y2X7	ARF GTPase-activating protein GIT1 OS=Homo sapiens OX=9606 GN=GIT1 PE=1 SV=2	0.904	0.129	1.522	1.463	1.033	1.618	7.996	0.962	0.679	-0.15	-2.95	0.61	0.55	0.05	0.69	3	-0.06	-0.56	0.998613	0.422668	0.998923	0.985081	0.999999	0.999796	0.463617	0.906802	0.99728	99.1	89.6	12.8	150.9	145.1	102.4	52.21	28.82	130.71	10.64	90.16	20.72	89.9	181.3	70	81.2	56.4	102.5	11.6
GYLTDLNSMIPTHGGDINDIKK	1xPhospho [T4]	O94906	Pre-mRNA-processing factor 6 OS=Homo sapiens OX=9606 GN=PRPF6 PE=1 SV=1	0.22	0.129	0.243	0.243	0.158	1.101	1.219	0.998	0.648	-2.18	-2.95	-2.04	-2.04	-2.67	0.14	0.29	0	-0.63	0.937001	0.85799	0.721773	0.787875	0.339467	0.998749	0.914235	0.999994	0.976975	301	66.3	38.9	73.2	73	47.5	86.52	104.25	141.32	27.5	20.63	70.2	435.3	223.9	35.1	32.2	224	49.3	29
RSSDPALIGLSTSVSDSNFSSEEPSR	1xPhospho [S3]; 1xDeamidated [N18]	Q8TEW0	Partitioning defective 3 homolog OS=Homo sapiens OX=9606 GN=PARD3 PE=1 SV=2	0.874	0.13	0.132	0.056	1.085	0.065	8.378	0.429	8.248	-0.2	-2.95	-2.93	-4.15	0.12	-3.95	3.07	-1.22	3.04	1	0.999423	0.999447	0.649585	0.999942	0.676094	0.994226	0.81961	0.994368	183.1	160	23.7	24.1	10.3	198.7	97.82	86.57	133.15	135.68	87.94	76.48	343.6	3.9	173.3	151.4	5.9	216.7	22.5
YSLADQTSGDQSPLPPCTPTPPCAEMR	1xDeamidated [Q11]; 1xPhospho [S12]; 2xCarbamidomethyl [C17; C23]	Q06124	Tyrosine-protein phosphatase non-receptor type 11 OS=Homo sapiens OX=9606 GN=PTPN11 PE=1 SV=3	1.28	0.13	1.095	1.144	1.298	0.894	10.009	1.045	1.186	0.36	-2.95	0.13	0.19	0.38	-0.16	3.32	0.06	0.25	0.999809	0.893425	0.999998	0.997856	0.999998	0.999977	0.851039	0.994078	1	100.9	129.1	13.1	110.5	115.4	131	73.37	83.7	16.69	69.67	85.62	74.42	162.2	17.4	136.1	4.4	174.1	187.8	16.6
LIDSSGSASVLTHSSSGNSLK	1xPhospho [T12]	Q96SU4	Oxysterol-binding protein-related protein 9 OS=Homo sapiens OX=9606 GN=OSBPL9 PE=1 SV=2	1.087	0.13	0.896	0.824	0.605	0.758	4.635	0.919	0.675	0.12	-2.94	-0.16	-0.28	-0.73	-0.4	2.21	-0.12	-0.57	0.961107	0.0955031	1	0.99999	0.996725	0.982681	0.196554	0.999986	0.996332	132.1	143.6	17.2	118.4	108.8	79.9	18.01	83.49	91.72	8.39	10.27	24.93	152.7	143.4	106.9	189.8	155.8	5.9	0.3
VVQEYIDAFSDYANFK	1xPhospho [Y12]	P18433	Receptor-type tyrosine-protein phosphatase alpha OS=Homo sapiens OX=9606 GN=PTPRA PE=1 SV=3	0.096	0.131	1.126	1.069	0.042	11.087	0.321	0.949	0.037	-3.37	-2.94	0.17	0.1	-4.58	3.47	-1.64	-0.07	-4.75	0.92128	0.946752	0.989649	0.989757	0.362512	0.640238	0.829468	0.836754	0.683896	173.2	16.7	22.6	195.1	185.2	7.3	72.82	131.89	115.15	85.34	17.06	83.68	217.7	25.3	168.9	162.6	16.3	14.5	22.1
SGVDQMDLFGDMSTPPDLNSPTESK	1xDeamidated [N/Q]; 1xPhospho [S/T]	P98082	Disabled homolog 2 OS=Homo sapiens OX=9606 GN=DAB2 PE=1 SV=3	0.793	0.131	1.301	1.197	0.086	1.509	0.659	0.92	0.066	-0.33	-2.93	0.38	0.26	-3.53	0.59	-0.6	-0.12	-3.91	0.939429	0.0814469	0.988313	0.998794	0.333812	0.793924	0.930224	0.999872	0.137213	133.1	105.5	17.4	173.2	159.3	11.5	18.07	67.24	71.03	56.55	34.5	152.99	102.7	133	95.4	81.5	105.1	17	2.8
SPPMELQPPVSPQQSECNPVGALQELVVQK	1xDeamidated [N/Q]; 1xPhospho [S]; 1xCarbamidomethyl [C17]	Q15633	RISC-loading complex subunit TARBP2 OS=Homo sapiens OX=9606 GN=TARBP2 PE=1 SV=3	0.174	0.131	0.134	0.925	0.161	5.302	1.226	6.926	1.203	-2.52	-2.93	-2.9	-0.11	-2.64	2.41	0.29	2.79	0.27	0.744998	0.257107	0.375676	0.952331	0.820191	0.994265	0.870678	0.831386	0.957551	237.7	41.5	31.2	31.7	219.8	38.2	29.38	118.11	135.92	15.52	70.77	122.86	275.8	184.7	160.5	198.8	21.5	32.2	151.2
EGTLTQVPLAPPPPGAPPSPAPAR	1xDeamidated [Q6]; 1xPhospho [S19]	P48634	Protein PRRC2A OS=Homo sapiens OX=9606 GN=PRRC2A PE=1 SV=3	0.15	0.131	0.168	0.177	0.096	1.175	0.732	1.053	0.573	-2.73	-2.93	-2.58	-2.5	-3.38	0.23	-0.45	0.07	-0.8	0.877046	0.979081	0.815983	0.526658	0.510242	0.982793	0.877508	0.994006	0.99231	348.4	52.3	45.8	58.4	61.5	33.5	78.2	146.54	133.81	16.06	71.81	62.88	367.2	32.4	253.4	6.9	38.1	386.6	351.5
LAAGHELQPLAIVDQRPSSRASSR	3xPhospho [S19; S22; S23]	P17302	Gap junction alpha-1 protein OS=Homo sapiens OX=9606 GN=GJA1 PE=1 SV=2	0.412	0.131	0.853	0.434	0.42	1.052	3.198	0.509	0.493	-1.28	-2.93	-0.23	-1.21	-1.25	0.07	1.68	-0.98	-1.02	0.995558	0.975859	1	1	0.999999	0.994887	0.960069	1	1	184.6	76.1	24.3	157.4	80.1	77.6	84.82	83.77	51.8	92	106.01	93.32	174.6	206.5	4	55.6	242	72	35
SSPDNSPVHGMLR	1xPhospho [S]	Q12791	Calcium-activated potassium channel subunit alpha-1 OS=Homo sapiens OX=9606 GN=KCNMA1 PE=1 SV=2	1.586	0.132	0.931	1.413	0.768	0.891	5.834	1.518	0.825	0.67	-2.93	-0.1	0.5	-0.38	-0.17	2.54	0.6	-0.28	0.963339	0.35494	0.889453	0.972907	0.999773	1	0.247306	0.503422	0.769406	102.9	163.2	13.6	95.8	145.4	79.1	52.38	42.3	8.07	86.32	40.95	31.62	111.4	36	122.8	219.2	176.7	86.1	14.7
SGSTSISAPTGPSSPLPAPETPTAPAAESAPNGLSTVSHDYLK	1xPhospho [S/T]; 1xDeamidated [N32]	O15357	Phosphatidylinositol 3,4,5-trisphosphate 5-phosphatase 2 OS=Homo sapiens OX=9606 GN=INPPL1 PE=1 SV=2	1.043	0.132	1.609	1.511	1.974	1.449	14.983	0.939	1.227	0.06	-2.92	0.69	0.6	0.98	0.53	3.91	-0.09	0.3	0.99993	0.112904	0.999834	0.999669	0.976107	0.995477	0.0344704	1	0.996452	82.5	86.1	10.9	132.8	124.7	163	41.81	3.32	145.24	30.31	25.79	22.46	146.1	77.3	72.4	84.9	80.6	79.9	3
DSGSDGHSVSSRDSAAPSPIPGADNLSADPVVSPPTSIPFK	2xPhospho [S]; 1xDeamidated [N25]	Q5T1M5	FK506-binding protein 15 OS=Homo sapiens OX=9606 GN=FKBP15 PE=1 SV=2	1.065	0.132	0.1	0.164	0.07	0.154	0.532	1.632	0.698	0.09	-2.92	-3.31	-2.61	-3.83	-2.7	-0.91	0.71	-0.52	0.75442	0.862305	0.964145	0.961452	0.536081	0.325122	0.988072	1	0.926279	237.1	252.4	31.3	23.8	38.9	16.6	88.85	20.59	23.05	138.35	9.35	11.66	327	5.6	219.9	234.1	319.8	222.2	31.8
SYSRFEEEDDDDDFPAPSDGYYR	1xPhospho [S3]	Q7L0J3	Synaptic vesicle glycoprotein 2A OS=Homo sapiens OX=9606 GN=SV2A PE=1 SV=1	0.298	0.132	1.436	1.061	1.035	3.563	7.849	0.739	0.721	-1.75	-2.92	0.52	0.09	0.05	1.83	2.97	-0.44	-0.47	0.929053	0.86413	0.999879	0.999984	0.999966	0.965543	0.780304	0.998559	1	120.9	36	15.9	173.7	128.3	125.1	75.87	63.47	50.22	78.91	80.78	67.41	165.3	180.7	15.3	49.3	9.7	50.2	15.4
EGETQGVAFEHESPADFQNSQSPVQDQDK	1xPhospho [S]	P78332	RNA-binding protein 6 OS=Homo sapiens OX=9606 GN=RBM6 PE=1 SV=5	0.969	0.132	1.09	1.049	0.13	1.083	0.983	0.963	0.119	-0.05	-2.92	0.12	0.07	-2.95	0.12	-0.03	-0.05	-3.07	0.999849	0.125419	0.99996	0.999971	0.0604223	1	0.997129	1	0.0443174	137.3	133	18.1	149.6	144.1	17.8	26.19	17.51	118.66	15.26	21.97	84.89	87.6	150.7	127.9	162.8	123.8	119.9	13.9
QFLISPPASPPVGWK	2xPhospho [S5; S9]	P53805	Calcipressin-1 OS=Homo sapiens OX=9606 GN=RCAN1 PE=1 SV=4	0.383	0.132	1.86	0.314	0.926	0.82	6.998	0.169	0.498	-1.39	-2.92	0.9	-1.67	-0.11	-0.29	2.81	-2.57	-1.01	0.999927	0.500365	0.999398	0.99679	0.979049	0.999832	0.870449	0.965537	0.903141	130	49.8	17.2	241.9	40.8	120.3	77.55	128.1	45.88	87.71	137.56	96.1	84.7	34.4	191.8	30.1	297.5	32.4	20.6
MGQAGSTISNSHAQPFDFPDDNQNSK	1xOxidation [M1]; 1xPhospho [S/T]; 1xDeamidated [N/Q]	P17302	Gap junction alpha-1 protein OS=Homo sapiens OX=9606 GN=GJA1 PE=1 SV=2	0.248	0.133	0.105	0.011	1.067	0.043	8.034	0.102	10.121	-2.01	-2.91	-3.25	-6.54	0.09	-4.53	3.01	-3.29	3.34	0.494467	0.176874	0.215249	0.0297051	0.998636	0.468615	0.307503	0.81809	0.365563	234	58	31.1	24.7	2.5	249.7	16.74	51.68	83.85	103	151.74	67.35	250.7	200.5	281.5	19.5	62.2	63.1	4.4
AELEEMEEVHPSDEEEEDATKAEGFYQK	1xPhospho [S12]; 1xDeamidated [Q27]	P78559	Microtubule-associated protein 1A OS=Homo sapiens OX=9606 GN=MAP1A PE=1 SV=6	0.05	0.133	0.102	0.042	0.044	0.841	0.33	0.41	0.432	-4.33	-2.91	-3.3	-4.58	-4.51	-0.25	-1.6	-1.28	-1.21	0.39067	0.788782	0.607494	0.159003	0.156499	0.98576	0.741071	0.89689	0.893154	437.9	21.7	58.3	44.6	18.3	19.2	80.4	75.02	146.29	53.42	92.95	88.28	47.7	579.9	373.5	45.6	10.1	18.5	49.7
RSSLPSFETLDYGDEEDIETQLSSSGK	1xPhospho [S]; 1xDeamidated [Q21]	Q96ST8	Centrosomal protein of 89 kDa OS=Homo sapiens OX=9606 GN=CEP89 PE=1 SV=3	0.183	0.133	0.183	0.253	0.106	1.383	0.792	1.381	0.577	-2.45	-2.91	-2.45	-1.98	-3.24	0.47	-0.34	0.47	-0.79	0.853784	0.378766	0.929514	0.977286	0.370126	0.997469	1	0.999893	0.865112	323	59	43.1	59.1	81.6	34.1	75.23	110.75	50.45	102.17	95.84	62.25	350.6	244.2	38.3	44.6	25.6	219.8	32.6
GGATPLSYPSPGPQPPGPSWTATFDPVPTDAPTSPR	1xPhospho [S/T]	Q9UPN7	Serine/threonine-protein phosphatase 6 regulatory subunit 1 OS=Homo sapiens OX=9606 GN=PPP6R1 PE=1 SV=5	0.335	0.133	0.723	0.645	0.901	1.927	6.761	0.892	1.246	-1.58	-2.91	-0.47	-0.63	-0.15	0.95	2.76	-0.17	0.32	0.998664	0.512677	0.999113	0.997867	0.991091	1	0.247222	1	0.933046	160.5	53.7	21.4	116.1	103.5	144.7	32.96	157.82	117.07	24.4	39.44	149.62	85.2	49	51	421.2	9.5	17.1	38.9
TEQELPRPQSPSDLDSLDGR	1xPhospho [S10]	P54259	Atrophin-1 OS=Homo sapiens OX=9606 GN=ATN1 PE=1 SV=3	0.831	0.133	1.026	1.041	1.265	1.253	9.474	1.015	1.232	-0.27	-2.91	0.04	0.06	0.34	0.33	3.24	0.02	0.3	0.773872	0.181507	1	0.999998	0.999989	0.716834	0.145401	1	0.999999	113.3	94.1	15.1	116.3	117.9	143.3	9.82	75.5	125.71	20.84	11.98	26.8	125.6	103.1	114.9	95.4	115.2	10.5	6.7
SVTVVEDDEDEDGDDLLHHHHGSHCSSSGDPAEYNLR	1xCarbamidomethyl [C25]; 1xPhospho [S/T]	P02545	Prelamin-A/C OS=Homo sapiens OX=9606 GN=LMNA PE=1 SV=1	0.917	0.134	0.513	1.033	0.486	1.127	3.638	2.015	0.948	-0.13	-2.9	-0.96	0.05	-1.04	0.17	1.86	1.01	-0.08	1	0.243263	0.819279	0.778297	0.838551	0.769399	0.836928	0.999999	1	147	134.7	19.6	75.4	151.9	71.5	91.31	52.39	106.71	53.28	74.59	26.05	60.9	383.4	119.9	109.9	248.5	106.2	16
HSLTSQSQISPK	1xPhospho [S10]	Q6IMN6	Caprin-2 OS=Homo sapiens OX=9606 GN=CAPRIN2 PE=1 SV=1	0.198	0.134	0.91	0.663	1.652	3.343	12.356	0.729	1.816	-2.33	-2.9	-0.14	-0.59	0.72	1.74	3.63	-0.46	0.86	0.532378	0.472717	0.999947	1	0.992051	0.54439	0.2271	0.999912	0.998962	131.7	26.1	17.6	119.8	87.3	217.5	67.45	99.57	126.98	15.9	58.29	59.73	197.3	129.3	35.3	82.1	25.6	8.4	111.6
FHSLPFSLTK	1xPhospho [S3]	Q9NQC7	Ubiquitin carboxyl-terminal hydrolase CYLD OS=Homo sapiens OX=9606 GN=CYLD PE=1 SV=1	0.169	0.134	0.933	0.12	0.172	0.713	1.283	0.129	0.184	-2.57	-2.9	-0.1	-3.06	-2.54	-0.49	0.36	-2.96	-2.44	0.747173	0.222864	0.992603	0.536006	0.728025	0.998792	0.90103	0.83532	0.951986	237.3	40	31.8	221.5	28.5	40.8	4.25	10.71	84.9	75.23	158.23	9.77	203.3	219.7	205.5	40.3	32.9	34.6	0.8
SPQLSLSPRPASPK	2xPhospho [S7; S12]	O95785	Protein Wiz OS=Homo sapiens OX=9606 GN=WIZ PE=1 SV=2	0.369	0.134	0.321	0.322	0.846	0.872	6.311	1.004	2.638	-1.44	-2.9	-1.64	-1.64	-0.24	-0.2	2.66	0.01	1.4	0.997333	0.889392	1	0.999685	0.984037	0.999982	0.551122	0.999014	0.990732	200.6	74	26.9	64.3	64.5	169.7	84.53	112.18	64.4	78.55	28.77	55.08	183.4	254.8	9.5	229.6	8.6	67.7	57.9
SSRFSGGFGAR	1xPhospho [S5]	O00571	ATP-dependent RNA helicase DDX3X OS=Homo sapiens OX=9606 GN=DDX3X PE=1 SV=3	0.176	0.134	0.515	0.223	0.48	1.273	3.58	0.434	0.933	-2.51	-2.9	-0.96	-2.16	-1.06	0.35	1.84	-1.2	-0.1	0.444343	0.178356	0.995528	0.870691	0.456495	0.962144	0.979652	0.988059	0.73328	237.3	41.7	31.8	122.1	53	114	33.44	44.89	79.82	28.5	58.34	92.2	230	158	314.4	40.4	15.5	40.5	30.9
GQPGNAYDGAGQPSAAYLSMSQGAVANANSTPPPYER	1xOxidation [M20]; 1xDeamidated [N/Q]; 1xPhospho [S/T]	Q96PK6	RNA-binding protein 14 OS=Homo sapiens OX=9606 GN=RBM14 PE=1 SV=2	0.916	0.134	1.282	1.156	1.204	1.263	8.972	0.901	0.939	-0.13	-2.9	0.36	0.21	0.27	0.34	3.17	-0.15	-0.09	0.999971	0.394322	1	0.788799	1	0.868837	0.40677	0.774175	1	105.4	96.5	14.1	135.2	121.9	126.9	32.13	19.81	130.83	14.11	88.75	12.87	170.2	102.5	99.8	93.9	125.5	87.6	86.8
SQDVAVSPQQQQCSKSYVDR	2xPhospho [S7; S14]; 1xCarbamidomethyl [C13]	Q96F86	Enhancer of mRNA-decapping protein 3 OS=Homo sapiens OX=9606 GN=EDC3 PE=1 SV=1	0.888	0.134	0.863	0.532	0.109	0.599	0.808	0.616	0.126	-0.17	-2.89	-0.21	-0.91	-3.2	-0.74	-0.31	-0.7	-2.99	0.989055	3.08011e-05	1	0.390705	0.00010945	0.721082	0.914594	0.417445	0.000117676	170.2	151.1	22.9	146.9	90.5	18.5	13.69	27.75	53.36	10.48	4.89	26.56	137.3	176.3	175.7	171.6	97.1	155.9	7.5
NNESQWKDSPLATR	1xPhospho [S9]	O95155	Ubiquitin conjugation factor E4 B OS=Homo sapiens OX=9606 GN=UBE4B PE=1 SV=1	1.091	0.135	1.025	0.69	0.561	0.633	4.157	0.673	0.547	0.13	-2.89	0.04	-0.54	-0.83	-0.66	2.06	-0.57	-0.87	0.999999	0.142697	0.999974	0.501786	0.973013	0.549962	0.406315	0.598018	0.991462	133.3	145.4	18	136.6	92	74.7	29.22	13.9	23.8	21.78	100.73	51.46	123.2	119.9	195.5	152.2	134.4	115	16.6
LDSSEMDHSENEDYTMSSPLPGKK	1xPhospho [S]; 1xDeamidated [N11]	Q9NTI5	Sister chromatid cohesion protein PDS5 homolog B OS=Homo sapiens OX=9606 GN=PDS5B PE=1 SV=1	0.126	0.135	0.115	0.007	0.107	0.054	0.79	0.059	0.928	-2.98	-2.89	-3.12	-7.21	-3.23	-4.22	-0.34	-4.09	-0.11	0.596983	0.774084	0.89436	0.123564	0.719964	0.838793	0.999998	0.519898	0.998846	402.8	50.9	54.3	46.3	2.7	43	81.65	73.43	58.81	17.11	156.62	41.34	547.4	21.5	501.1	7.8	74.1	63.3	18.4
KGDDSDEEDLCISNK	1xPhospho [S5]; 1xCarbamidomethyl [C11]	Q9Y3M8	StAR-related lipid transfer protein 13 OS=Homo sapiens OX=9606 GN=STARD13 PE=1 SV=2	0.863	0.135	0.891	0.953	0.582	1.105	4.31	1.07	0.653	-0.21	-2.89	-0.17	-0.07	-0.78	0.14	2.11	0.1	-0.62	0.999945	0.353106	0.924809	0.999991	0.821242	1	0.946073	0.959312	0.99977	135.6	117	18.3	120.9	129.3	78.9	12.24	4.45	116.6	79.13	23.31	77.74	132.5	148.2	115.9	120.2	114.3	110	116.9
YSTLHTQSAEPPPPPEPARI	1xPhospho [S/T]; 1xDeamidated [Q7]	Q8TCZ2	CD99 antigen-like protein 2 OS=Homo sapiens OX=9606 GN=CD99L2 PE=1 SV=1	0.143	0.135	0.33	0.41	0.911	2.854	6.753	1.24	2.758	-2.8	-2.89	-1.6	-1.29	-0.13	1.51	2.76	0.31	1.46	0.999956	0.836923	0.999966	0.999953	0.999995	1	0.778645	1	0.999581	204.8	29.4	27.6	67.7	83.9	186.6	80	150.03	40.8	19.3	84.69	86.47	186.7	189.5	9.8	26.8	16	436.4	25.2
ELSNSVSTYRPFGLGSESPYKQPSDGMERPSSLMDSSQEK	1xPhospho [S/T/Y]	Q5VT52	Regulation of nuclear pre-mRNA domain-containing protein 2 OS=Homo sapiens OX=9606 GN=RPRD2 PE=1 SV=1	0.048	0.135	0.074	0.038	0.062	0.784	0.457	0.514	0.835	-4.37	-2.89	-3.76	-4.72	-4.02	-0.35	-1.13	-0.96	-0.26	0.691119	0.976677	0.909096	0.339593	0.84526	0.983788	0.99703	0.864655	0.999979	442.3	21.4	59.7	32.6	16.8	27.3	108.77	155.02	101.94	144.95	111.52	128.88	14.2	680	239.7	2.8	11.6	189.9	26
LSGINEIPRPFSPPVTSNTSPPPAAPLAR	2xPhospho [S/T]	Q0JRZ9	F-BAR domain only protein 2 OS=Homo sapiens OX=9606 GN=FCHO2 PE=1 SV=2	1.474	0.135	1.082	1.38	1.137	0.936	8.421	1.276	1.051	0.56	-2.89	0.11	0.47	0.18	-0.1	3.07	0.35	0.07	0.519686	0.787171	0.770628	0.527986	0.726245	1	0.149287	0.997583	0.999999	96.7	142.5	13	104.6	133.4	109.8	75.92	17.12	113.18	17.17	10.25	12.2	94.8	116.7	10.4	113.5	139.8	160.6	81.1
RNLLEDDSDEEEDFFLR	1xDeamidated [N2]; 1xPhospho [S8]	O75379	Vesicle-associated membrane protein 4 OS=Homo sapiens OX=9606 GN=VAMP4 PE=1 SV=2	1.426	0.135	1.099	0.249	1.12	0.174	8.285	0.226	1.019	0.51	-2.89	0.14	-2.01	0.16	-2.52	3.05	-2.14	0.03	0.948976	0.731411	0.98799	0.881031	1	0.426137	0.721506	0.561816	0.989495	119.3	170.1	16.1	131.1	29.7	133.6	59.68	8.86	136.98	19.73	122.85	67.81	121.4	124.3	28.4	147.9	173.3	173.2	4.7
RNSAPVSVSAVR	1xPhospho [S3]	Q2M1Z3	Rho GTPase-activating protein 31 OS=Homo sapiens OX=9606 GN=ARHGAP31 PE=1 SV=2	0.62	0.136	0.29	0.066	0.227	0.106	1.677	0.227	0.784	-0.69	-2.88	-1.79	-3.93	-2.14	-3.24	0.75	-2.14	-0.35	1	0.630814	0.999063	0.289319	0.954017	0.282968	0.974016	0.454673	0.995845	256.6	159.1	34.8	74.4	16.9	58.3	65.75	38.79	63.85	94	140.97	98.64	40.6	239.8	209	129.6	190.3	85.8	21.9
ALPATPQLPSR	1xPhospho [T5]	O43516	WAS/WASL-interacting protein family member 1 OS=Homo sapiens OX=9606 GN=WIPF1 PE=1 SV=3	0.149	0.136	0.103	0.196	0.065	1.314	0.48	1.902	0.634	-2.75	-2.88	-3.28	-2.35	-3.94	0.39	-1.06	0.93	-0.66	0.425374	0.217846	0.450402	0.958571	0.164443	0.862928	0.999959	0.882332	0.973859	364	54.2	49.4	37.4	71.2	23.7	61.36	55.19	83.24	79.92	90.89	111.79	360.4	355.1	77	21.1	52.8	76.2	48.2
SMPVLGSVSSVTK	1xPhospho [S1]	A0MZ66	Shootin-1 OS=Homo sapiens OX=9606 GN=SHTN1 PE=1 SV=4	0.413	0.136	0.802	0.423	0.37	1.024	2.724	0.527	0.461	-1.28	-2.88	-0.32	-1.24	-1.43	0.03	1.45	-0.92	-1.12	0.0137069	4.58045e-06	0.866406	0.0173483	0.00482714	0.99999	0.00246906	0.111369	0.0311824	190.8	78.8	25.9	153.1	80.7	70.6	18.17	10.85	46.15	11.55	13.29	23.51	222	190.3	153.5	78.6	73	90.1	25.9
VQSLPSVPLSCAAYR	1xPhospho [S3]; 1xCarbamidomethyl [C11]	Q96AD5	Patatin-like phospholipase domain-containing protein 2 OS=Homo sapiens OX=9606 GN=PNPLA2 PE=1 SV=1	0.815	0.136	0.98	0.103	0.813	0.126	5.972	0.105	0.829	-0.29	-2.88	-0.03	-3.28	-0.3	-2.99	2.58	-3.25	-0.27	0.905088	0.431727	0.900542	0.506294	0.986413	0.966496	0.780586	0.968781	0.998398	156	127.1	21.2	152.9	16	126.8	28.53	85.34	131.49	83.5	46.51	64.7	259.3	173.9	154.2	141.8	4.9	188.1	23.7
GEVLGLSSSLGK	1xPhospho [S9]	Q9NQG7	BLOC-3 complex member HPS4 OS=Homo sapiens OX=9606 GN=HPS4 PE=1 SV=2	0.857	0.136	0.732	0.762	0.287	0.888	2.104	1.041	0.392	-0.22	-2.88	-0.45	-0.39	-1.8	-0.17	1.07	0.06	-1.35	0.641157	1.9907e-05	0.884701	0.656309	0.00122312	1	0.0884556	0.996852	0.00678436	159	136.3	21.7	116.3	121.1	45.6	21.22	41.89	30.81	15.26	20.02	19.2	203.5	163	133.1	139.7	162.8	64.7	22.2
VSGPDPKPGSNCSPAQSVLSEVPSVPTNGMAK	2xDeamidated [N28; N/Q]; 1xCarbamidomethyl [C12]; 1xPhospho [S]	P22314	Ubiquitin-like modifier-activating enzyme 1 OS=Homo sapiens OX=9606 GN=UBA1 PE=1 SV=3	0.83	0.136	0.639	0.692	0.534	0.834	3.916	1.083	0.837	-0.27	-2.87	-0.65	-0.53	-0.9	-0.26	1.97	0.12	-0.26	0.998777	0.359256	0.99996	0.973262	0.999989	0.868208	0.428875	0.933303	0.999349	156.6	130	21.4	100	108.3	83.7	64.6	7.92	115.87	18.51	78.48	20.73	175.5	32.4	174.9	145.1	126.7	146.5	23.9
QICLVMLETLSQSPQGR	1xCarbamidomethyl [C3]; 1xPhospho [S]; 1xDeamidated [Q]	Q15365	Poly(rC)-binding protein 1 OS=Homo sapiens OX=9606 GN=PCBP1 PE=1 SV=2	2.178	0.137	0.833	1.527	0.775	0.701	5.67	1.834	0.931	1.12	-2.87	-0.26	0.61	-0.37	-0.51	2.5	0.88	-0.1	0.651897	0.998982	0.944972	0.776243	0.898285	0.999895	0.731154	0.997643	0.999984	93	202.6	12.7	77.5	142.1	72.1	95.38	33.91	141.21	38.75	41.46	75.31	3.7	79.8	155.9	90.8	173.9	182.2	151.8
FVKDFQDYMEPEEGCQGSPQRR	1xCarbamidomethyl [C15]; 1xPhospho [S18]	O43237	Cytoplasmic dynein 1 light intermediate chain 2 OS=Homo sapiens OX=9606 GN=DYNC1LI2 PE=1 SV=1	0.024	0.138	0.163	0.277	0.34	11.745	2.47	1.704	2.089	-5.41	-2.86	-2.62	-1.85	-1.56	3.55	1.3	0.77	1.06	0.0609716	0.299444	0.385997	0.887274	0.937034	0.313843	0.777412	0.922775	0.867701	309.2	7.3	42.5	50.3	85.6	105	86.83	155.78	78.42	59.69	31.25	6.74	611.3	276.7	64.5	105.6	1.1	6.5	6.8
EHSPYGPSPLGWPSSETR	1xPhospho [S8]	Q96PC5	Melanoma inhibitory activity protein 2 OS=Homo sapiens OX=9606 GN=MIA2 PE=1 SV=4	0.791	0.138	0.953	0.612	0.369	0.774	2.678	0.642	0.387	-0.34	-2.86	-0.07	-0.71	-1.44	-0.37	1.42	-0.64	-1.37	0.629495	0.0962463	1	0.977784	0.699313	0.947403	0.663322	0.983172	0.72362	155.3	122.9	21.4	148	95.1	57.2	7.76	86.75	83.2	25.81	1.72	2.22	155.9	172	147.8	123.4	186	6.2	7.1
APSPTSSAGEEGTKKPEPLSPASYHQPEGVAR	1xPhospho [S3]; 1xDeamidated [Q26]	O94964	Microtubule cross-linking factor 2 OS=Homo sapiens OX=9606 GN=MTCL2 PE=1 SV=3	0.198	0.138	0.552	1.056	1.272	5.345	9.244	1.913	2.305	-2.34	-2.86	-0.86	0.08	0.35	2.42	3.21	0.94	1.2	1	0.836175	1	0.999943	0.954636	0.999961	0.385666	0.999875	0.946708	142.3	28.1	19.6	78.6	150.3	181.1	57.37	169.16	68.04	63.54	48.98	130.1	14.5	58.5	44.9	884.2	5.1	8.9	6.1
QRHSVSIVETNLGMGR	1xPhospho [S4]	Q9Y4G8	Rap guanine nucleotide exchange factor 2 OS=Homo sapiens OX=9606 GN=RAPGEF2 PE=1 SV=1	0.231	0.138	1.014	0.695	0.106	3.008	0.768	0.685	0.104	-2.11	-2.86	0.02	-0.53	-3.24	1.59	-0.38	-0.55	-3.26	0.519358	0.0385309	0.999998	0.759181	0.0763795	0.997748	0.998109	0.701628	0.0641524	188.5	43.5	26	191.1	130.9	20	9.4	55.48	71.24	6.82	67.67	111.97	199.2	189.8	165.5	43.8	98.8	38.3	35.9
DSGSDQDLDGAGVRASDLEDEESAAR	1xPhospho [S16]	Q86VM9	Zinc finger CCCH domain-containing protein 18 OS=Homo sapiens OX=9606 GN=ZC3H18 PE=1 SV=2	0.29	0.139	0.304	0.177	0.076	0.61	0.551	0.582	0.252	-1.79	-2.85	-1.72	-2.5	-3.71	-0.71	-0.86	-0.78	-1.99	0.9958	0.624857	0.996468	0.847289	0.64806	0.981744	1	0.979566	0.883536	302.2	87.6	41.9	91.7	53.4	23.1	65.2	86.19	136.1	95.66	33.42	139.92	262.7	46.4	253.2	37.1	73.4	213.3	1.8
ELLQESQEEEEEEEEEMPSKDPSPEPPSR	1xPhospho [S6]; 1xOxidation [M17]	Q8IVL6	Prolyl 3-hydroxylase 3 OS=Homo sapiens OX=9606 GN=P3H3 PE=1 SV=1	0.175	0.139	1.713	0.079	1.459	0.453	10.494	0.046	0.852	-2.51	-2.85	0.78	-3.65	0.54	-1.14	3.39	-4.43	-0.23	0.946144	0.662667	0.999405	0.940351	0.996564	1	0.405515	0.820448	0.999989	131.4	23.1	18.3	225.1	10.4	191.7	77.15	16.25	65.73	82.07	150.05	69.18	155.3	13.6	179	24.1	33.1	27.3	21.6
SGSPSDNSGAEEMEVSLAKPK	1xPhospho [S3]; 1xOxidation [M13]	P31749	RAC-alpha serine/threonine-protein kinase OS=Homo sapiens OX=9606 GN=AKT1 PE=1 SV=2	0.778	0.139	0.826	0.78	1.116	1.002	8.029	0.944	1.351	-0.36	-2.85	-0.28	-0.36	0.16	0	3.01	-0.08	0.43	0.717567	0.0396382	0.997217	0.999492	0.999958	0.870377	0.0288875	0.999992	0.986105	129.3	100.7	18	106.8	100.8	144.4	8.86	76.53	88.36	51.86	6.75	10.72	119.8	133.1	143.1	10.9	128.5	103.6	18.5
ASPITNDGEDEFVPSDGLDKDEYTFSPGK	1xDeamidated [N6]; 2xPhospho [S15; S26]	Q02880	DNA topoisomerase 2-beta OS=Homo sapiens OX=9606 GN=TOP2B PE=1 SV=3	0.095	0.139	0.093	0.181	0.035	1.91	0.249	1.942	0.372	-3.4	-2.85	-3.43	-2.47	-4.85	0.93	-2.01	0.96	-1.43	0.627137	0.632427	0.504412	0.968797	0.21046	0.959545	0.9409	0.899303	0.982311	389.1	36.8	54.1	36.2	70.3	13.5	75.05	34.06	142.59	24.35	121.82	51.96	407.7	40.3	317.2	26.8	49	30	44.1
SWDSSSPVDRPEPEAASPTTR	1xPhospho [S/T]	Q86WB0	Zinc finger C3HC-type protein 1 OS=Homo sapiens OX=9606 GN=ZC3HC1 PE=1 SV=1	0.871	0.139	1.116	1.081	1.16	1.241	8.34	0.969	1.039	-0.2	-2.85	0.16	0.11	0.21	0.31	3.06	-0.05	0.06	0.996777	0.0100197	0.99997	1	0.999829	0.995787	0.00661409	0.999987	1	111.8	97.4	15.5	124.8	120.9	129.7	10.64	8.37	113.02	16.58	7.89	9.98	104.6	127.6	109.5	95.4	97.6	83.3	4.1
SGDCIRHSSTFDQTAER	1xCarbamidomethyl [C4]; 1xPhospho [S]	O75157	TSC22 domain family protein 2 OS=Homo sapiens OX=9606 GN=TSC22D2 PE=1 SV=3	0.368	0.139	1.746	1.98	0.461	5.379	3.31	1.134	0.264	-1.44	-2.84	0.8	0.99	-1.12	2.43	1.73	0.18	-1.92	0.64491	0.709893	0.923428	0.853831	0.993192	0.148632	0.941628	0.999957	0.673371	105.4	38.8	14.7	184	208.6	48.6	72.52	104.56	109.59	2.22	34.54	47.08	101.6	150.5	20.2	0.9	37.4	89.5	5.1
LEKEEEEGISQESSEEEQ	2xPhospho [S13; S]	P17096	High mobility group protein HMG-I/HMG-Y OS=Homo sapiens OX=9606 GN=HMGA1 PE=1 SV=3	0.684	0.14	0.858	0.114	0.136	0.167	0.973	0.133	0.158	-0.55	-2.84	-0.22	-3.13	-2.88	-2.58	-0.04	-2.91	-2.66	0.642763	0.291389	0.922083	0.560388	0.460741	0.999989	0.998981	0.973771	0.935839	204.7	139.9	28.6	175.6	23.4	27.8	57.81	85.66	82.19	78.83	63.09	84.92	437	218.6	141	149.5	2	171.9	30.5
EIAIVHSDAEKEQEEEEQKQEMEVK	1xPhospho [S7]	Q9H307	Pinin OS=Homo sapiens OX=9606 GN=PNN PE=1 SV=5	1.156	0.14	1.711	0.275	0.895	0.238	6.403	0.161	0.523	0.21	-2.84	0.77	-1.86	-0.16	-2.07	2.68	-2.64	-0.93	0.960044	0.640846	0.966525	0.988803	0.99976	0.99993	0.787586	0.738238	0.893947	115.9	134	16.2	198.3	31.9	103.7	52.14	87.56	76.89	20.45	117.82	77.53	40.7	138.9	117.3	179.9	1.9	135.6	37.2
SPTSPSHLTHFKPLTPDQDEPPFK	1xPhospho [S/T]	Q9Y2I7	1-phosphatidylinositol 3-phosphate 5-kinase OS=Homo sapiens OX=9606 GN=PIKFYVE PE=1 SV=3	0.333	0.14	0.858	3.514	0.885	10.546	6.3	4.097	1.031	-1.59	-2.83	-0.22	1.81	-0.18	3.4	2.66	2.03	0.04	0.902633	0.52455	0.997896	0.998632	1	0.725338	0.532535	0.961594	0.998213	89.1	29.7	12.5	76.5	313.3	78.9	39.98	145.01	32.82	70.84	84.65	31.7	118.9	90.1	50.2	30	260.6	2.5	16.9
GILSLPHQASPVSR	1xPhospho [S10]	O75925	E3 SUMO-protein ligase PIAS1 OS=Homo sapiens OX=9606 GN=PIAS1 PE=1 SV=2	0.938	0.141	1.098	0.95	3.138	1.013	22.326	0.865	2.858	-0.09	-2.83	0.14	-0.07	1.65	0.02	4.48	-0.21	1.51	0.849008	0.497367	0.884076	0.963242	0.364368	0.998968	0.021122	0.99972	0.910976	82.6	77.5	11.6	90.7	78.5	259.1	82.59	63.75	105.75	7.51	21.27	43.25	115.5	87.2	5.3	195.8	62.1	81.8	1.3
FDQLFDDESDPFEVLK	1xPhospho [S9]	Q8NC51	SERPINE1 mRNA-binding protein 1 OS=Homo sapiens OX=9606 GN=SERBP1 PE=1 SV=2	0.121	0.141	1.103	0.157	0.133	1.29	0.945	0.142	0.121	-3.04	-2.83	0.14	-2.67	-2.91	0.37	-0.08	-2.82	-3.05	0.353144	0.495197	0.999759	0.89193	0.331371	0.895303	0.999344	0.771255	0.228236	226	27.5	31.8	249.3	35.4	30	71.63	52.48	52.56	64.58	135.79	61.48	280.4	33.6	243.8	10.8	37	29.6	48.3
SRSPSSEHR	2xPhospho [S3; S]	Q9P1Y6	PHD and RING finger domain-containing protein 1 OS=Homo sapiens OX=9606 GN=PHRF1 PE=1 SV=3	0.19	0.141	0.208	0.183	0.162	0.963	1.149	0.883	0.782	-2.39	-2.82	-2.27	-2.45	-2.62	-0.05	0.2	-0.18	-0.35	0.99981	1	1	0.999955	0.999133	1	0.998986	0.999979	0.999419	318.3	60.6	45	66.1	58.4	51.7	85.36	37.26	128.43	25.02	15.09	2.2	314.5	3.6	339.3	59.9	81.5	37.2	26.5
ISDYFEYQGGNGSSPVR	1xDeamidated [N11]; 1xPhospho [S]	Q9UKI8	Serine/threonine-protein kinase tousled-like 1 OS=Homo sapiens OX=9606 GN=TLK1 PE=1 SV=2	0.736	0.142	0.787	0.547	0.576	0.743	4.067	0.695	0.733	-0.44	-2.82	-0.35	-0.87	-0.79	-0.43	2.02	-0.52	-0.45	0.991983	0.100262	0.97884	0.76983	0.292086	0.969363	0.977574	0.98702	0.650999	158.4	116.6	22.5	124.6	86.6	91.3	16.52	32.21	6.84	32.4	63.89	81.84	207.2	150.6	168.2	164.7	84.6	123.8	23.8
IKPTGLLTIPSPQI	1xPhospho [S11]	Q8TEA7	TBC domain-containing protein kinase-like protein OS=Homo sapiens OX=9606 GN=TBCK PE=1 SV=4	0.464	0.142	0.194	0.336	0.422	0.723	2.972	1.728	2.172	-1.11	-2.82	-2.36	-1.57	-1.24	-0.47	1.57	0.79	1.12	0.98026	0.640936	0.708831	0.947351	0.977032	0.999964	0.953298	0.991643	0.975274	234.5	108.9	33.3	45.6	78.7	99	92.19	68.55	105.74	55.99	69.68	61.8	497	19	261.6	121.5	135.4	19.7	112.6
HSISGPISTSKPLTALSDK	1xPhospho [S2]	Q69YQ0	Cytospin-A OS=Homo sapiens OX=9606 GN=SPECC1L PE=1 SV=3	0.202	0.142	1.136	0.15	0.137	0.746	0.966	0.132	0.121	-2.31	-2.82	0.18	-2.73	-2.86	-0.42	-0.05	-2.92	-3.05	0.994392	0.544896	0.998995	0.74366	0.703171	0.95119	0.999713	0.540226	0.499114	216.8	43.7	30.8	246.3	32.6	29.8	80.96	140.09	63.66	66.77	38.29	28.26	215.4	17.2	290.5	15.5	43.4	399	41.9
ATTPPNQGRPDSPVYANLQELK	1xPhospho [S/T]	Q8IWW6	Rho GTPase-activating protein 12 OS=Homo sapiens OX=9606 GN=ARHGAP12 PE=1 SV=1	0.444	0.142	0.929	2.031	1.651	4.574	11.592	2.187	1.778	-1.17	-2.81	-0.11	1.02	0.72	2.19	3.54	1.13	0.83	0.97727	0.870497	0.948387	0.742486	0.62138	0.357687	0.148359	0.994865	0.975222	96.8	43	13.8	89.9	196.7	159.8	77.1	62.22	99.65	12.35	91.32	31.9	95.3	111.2	8.5	8.9	43.6	42.3	8.4
SKFDSDEEEEDTENVEAASSGK	1xPhospho [S/T]	Q8TF01	Arginine/serine-rich protein PNISR OS=Homo sapiens OX=9606 GN=PNISR PE=1 SV=2	0.867	0.143	0.846	0.699	0.302	0.807	2.12	0.826	0.357	-0.21	-2.81	-0.24	-0.52	-1.73	-0.31	1.08	-0.28	-1.49	0.999635	0.0560508	0.993054	0.977082	0.683334	0.997925	0.493097	0.999976	0.929342	155.6	134.8	22.2	131.7	108.7	47	8.93	13.59	118.6	34.63	52.16	44.69	143.8	172	158.4	108.7	140.5	137.3	22.6
NKELYEINPPEISEEIIGSPIPEPR	1xPhospho [S19]	Q86YS7	C2 domain-containing protein 5 OS=Homo sapiens OX=9606 GN=C2CD5 PE=1 SV=1	0.017	0.143	0.197	0.119	0.123	7.044	0.863	0.604	0.627	-5.89	-2.81	-2.35	-3.07	-3.02	2.82	-0.21	-0.73	-0.67	0.0734257	0.626922	0.731075	0.486465	0.190383	0.778374	0.924771	0.997559	0.857479	375.4	6.3	53.6	73.8	44.6	46.3	76.17	145.78	30.36	39.78	62.12	76.89	570.6	53.1	430.9	90.2	7.3	3.4	61.6
EDSGLFSPIR	1xPhospho [S7]	Q9UKA4	A-kinase anchor protein 11 OS=Homo sapiens OX=9606 GN=AKAP11 PE=1 SV=1	1.243	0.143	0.085	0.084	0.121	0.068	0.844	0.99	1.421	0.31	-2.81	-3.56	-3.57	-3.05	-3.89	-0.24	-0.01	0.51	0.999972	0.458822	0.0712152	0.0431331	0.41745	0.0322067	0.999999	0.999575	0.833264	224.2	278.8	32.1	19.1	18.9	27.1	31.03	8.89	134.57	32.91	59.62	141.6	247.4	171.5	135.1	213.2	183.9	217.3	221.7
KAEENASQEEEEAAEDEGGEEDLASELR	1xPhospho [S7]; 1xDeamidated [N/Q]	Q9H4I2	Zinc fingers and homeoboxes protein 3 OS=Homo sapiens OX=9606 GN=ZHX3 PE=1 SV=3	0.567	0.143	0.567	0.679	0.596	1.196	4.161	1.196	1.05	-0.82	-2.8	-0.82	-0.56	-0.75	0.26	2.06	0.26	0.07	1	0.980895	0.999937	0.999864	1	0.999977	0.986931	1	0.99979	168.9	95.8	24.2	95.8	114.6	100.6	83.78	66.5	108.59	67.72	69.94	72.45	234.9	210.9	5.6	119.6	134	21.8	30.2
HPPEQTNGVHTPPHVASALAGAVSPGALR	2xDeamidated [Q5; N7]; 2xPhospho [T6; S24]	Q6P3S6	F-box only protein 42 OS=Homo sapiens OX=9606 GN=FBXO42 PE=1 SV=1	1.033	0.144	0.19	0.775	0.159	0.75	1.109	4.072	0.838	0.05	-2.8	-2.39	-0.37	-2.65	-0.41	0.15	2.03	-0.26	0.999997	0.0407527	0.0680197	0.856517	0.0204482	0.900476	0.998146	0.377951	0.976343	181.8	187.7	26.1	34.6	140.8	29	36.6	31.57	67.18	37.26	68.13	78.78	292.3	149.4	178	183.8	134.3	254.2	9.1
SNDSGEEAEKEFIFV	1xPhospho [S4]	Q5VZK9	F-actin-uncapping protein LRRC16A OS=Homo sapiens OX=9606 GN=CARMIL1 PE=1 SV=1	0.108	0.144	0.1	0.033	0.055	0.306	0.382	0.332	0.551	-3.21	-2.8	-3.33	-4.92	-4.19	-1.71	-1.39	-1.59	-0.86	0.26342	0.841153	0.395564	0.212785	0.439692	0.999987	0.972675	0.996968	0.999999	416.9	45	59.9	41.5	13.8	22.9	75.23	99.4	3.58	68.76	118.77	103.25	618.4	63.1	457.9	1	49.5	102.2	65.8
QVSSVNEEDFVR	1xPhospho [S]	P40189	Interleukin-6 receptor subunit beta OS=Homo sapiens OX=9606 GN=IL6ST PE=1 SV=2	0.268	0.144	0.683	0.889	0.239	3.317	1.662	1.301	0.35	-1.9	-2.8	-0.55	-0.17	-2.07	1.73	0.73	0.38	-1.52	0.754352	0.450151	0.999302	0.999343	0.627022	0.902415	0.999456	1	0.808232	186.2	49.9	26.8	127.2	165.5	44.5	75.58	115.29	95.26	9.36	66.33	62.17	310.7	49.3	160.6	203.5	16.6	43	100.6
SNSQSDSHDEEVSPTPPNPVVK	2xPhospho [S]	P31321	cAMP-dependent protein kinase type I-beta regulatory subunit OS=Homo sapiens OX=9606 GN=PRKAR1B PE=1 SV=4	0.881	0.144	0.193	0.176	0.136	0.2	0.946	0.91	0.703	-0.18	-2.8	-2.37	-2.51	-2.88	-2.32	-0.08	-0.14	-0.51	0.990389	0.288618	0.220734	0.169279	0.279817	0.38438	1	0.999968	0.999977	237.1	209	34.1	45.9	41.7	32.2	7.17	70.84	10.28	121.68	68.95	6.07	218.9	238.9	252.7	306.5	210.5	44.5	29.7
TDSLKGR	1xPhospho [S3]	Q92570	Nuclear receptor subfamily 4 group A member 3 OS=Homo sapiens OX=9606 GN=NR4A3 PE=1 SV=3	0.196	0.144	0.188	0.398	0.152	2.03	1.051	2.118	0.805	-2.35	-2.79	-2.41	-1.33	-2.72	1.02	0.07	1.08	-0.31	0.000654457	0.000114393	0.000713578	0.0113887	0.000156101	0.505305	0.999889	0.537542	0.889053	288.6	56.7	41.6	54.3	115	43.7	21.82	10.39	14.4	20.29	58.94	5.19	231.5	358.9	287.5	56.4	63.2	51.4	35
RVSSDEEHTVDSCISDMK	1xPhospho [S]; 1xCarbamidomethyl [C13]	Q70CQ2	Ubiquitin carboxyl-terminal hydrolase 34 OS=Homo sapiens OX=9606 GN=USP34 PE=1 SV=2	0.563	0.144	0.843	0.872	0.795	1.549	5.504	1.035	0.943	-0.83	-2.79	-0.25	-0.2	-0.33	0.63	2.46	0.05	-0.09	0.765778	0.215657	0.99992	0.999621	0.665224	0.897632	0.92975	0.999999	0.78187	142.3	80.1	20.5	119.9	124.1	113.1	2.29	67.78	100.17	5.2	13.96	79.81	146.8	148.1	153.3	118.8	19.8	83.4	21.4
ENQGSHESPTLNPETVAINLSDVDLSK	1xPhospho [S/T]	P25445	Tumor necrosis factor receptor superfamily member 6 OS=Homo sapiens OX=9606 GN=FAS PE=1 SV=1	0.064	0.145	0.053	0.198	0.12	3.12	0.824	3.762	2.267	-3.97	-2.79	-4.24	-2.33	-3.06	1.64	-0.28	1.91	1.18	0.267851	0.717603	0.34011	0.774773	0.688769	0.914695	1	0.960513	0.984358	379.9	24.2	55.1	20	75.4	45.4	77.52	116.1	43.97	87.01	63.13	86.13	481.7	433.5	34.6	108.8	4.9	27.6	62.9
ILRLSTFEK	1xPhospho [S5]	O94804	Serine/threonine-protein kinase 10 OS=Homo sapiens OX=9606 GN=STK10 PE=1 SV=1	0.137	0.145	0.047	1.402	0.961	10.203	6.622	29.901	20.496	-2.86	-2.78	-4.41	0.49	-0.06	3.35	2.73	4.9	4.36	0.94845	0.723791	0.720268	0.983451	0.999986	0.658551	0.802256	0.362017	0.799093	162.5	22.3	23.6	7.6	227.8	156.2	66.23	112.52	137.09	154.93	11.87	71.42	146.6	183.6	30.8	126.1	18.3	20.1	142.5
SMSQVDVDSGIENMEVDENDRR	1xPhospho [S9]	O95155	Ubiquitin conjugation factor E4 B OS=Homo sapiens OX=9606 GN=UBE4B PE=1 SV=1	0.573	0.145	1.254	1.704	1.618	2.973	11.145	1.359	1.29	-0.8	-2.78	0.33	0.77	0.69	1.57	3.48	0.44	0.37	0.705362	0.36215	0.964615	0.954651	0.911795	0.275012	0.0818161	1	0.999934	95.3	54.6	13.8	119.5	162.5	154.2	46.75	97.2	100.89	74.44	70.51	64.26	108.4	68	41.1	85.3	3	39	40
LEEKQKSDAEEDGGTVSQEEEDR	2xPhospho [S7; S17]	P27824	Calnexin OS=Homo sapiens OX=9606 GN=CANX PE=1 SV=2	0.716	0.145	1.391	1.619	0.601	2.262	4.142	1.164	0.432	-0.48	-2.78	0.48	0.69	-0.73	1.18	2.05	0.22	-1.21	0.999957	0.831153	0.775846	0.605044	0.999503	0.712147	0.667632	0.999532	0.91013	109.7	78.5	15.9	152.5	177.5	65.9	85.25	66.28	92.99	37.47	15.91	62.35	162	123	4.2	88	16.2	98.5	17.9
RVGDPPQPLPEEPMEVQGAERASPEPQR	1xPhospho [S23]	P46379	Large proline-rich protein BAG6 OS=Homo sapiens OX=9606 GN=BAG6 PE=1 SV=2	0.712	0.145	1.096	1.24	1.051	1.74	7.242	1.13	0.959	-0.49	-2.78	0.13	0.31	0.07	0.8	2.86	0.18	-0.06	0.996263	0.999998	0.992406	0.999555	0.992799	0.999974	0.984431	0.999829	1	114.4	81.5	16.6	125.4	141.8	120.3	85.15	77.7	145.33	74.42	94.92	75.74	1.5	127.7	132.2	17	150.6	90.9	18.5
SLGSLSQGSTNATVLDVAQTGGHK	1xPhospho [S]	Q9Y4G8	Rap guanine nucleotide exchange factor 2 OS=Homo sapiens OX=9606 GN=RAPGEF2 PE=1 SV=1	0.199	0.145	0.228	0.649	0.143	3.259	0.983	2.852	0.627	-2.33	-2.78	-2.14	-0.62	-2.81	1.7	-0.02	1.51	-0.67	0.412094	0.17115	0.634992	0.971994	0.3386	0.818203	0.996165	0.958369	0.992022	253.8	50.6	36.9	57.8	164.8	36.2	11.83	124.97	81.9	112.04	55.44	29.67	227.9	192.8	244.1	5.8	45.4	213.6	5.4
KPISTHTVDFTFNK	2xPhospho [T5; T7]	P18084	Integrin beta-5 OS=Homo sapiens OX=9606 GN=ITGB5 PE=1 SV=1	0.344	0.146	0.432	0.19	0.371	0.553	2.55	0.44	0.859	-1.54	-2.78	-1.21	-2.39	-1.43	-0.86	1.35	-1.19	-0.22	0.73352	0.244791	0.603146	0.144382	0.627106	0.769308	0.96575	0.876231	1	241.6	83.1	35.2	104.5	45.9	89.7	12.74	19.3	64.55	95.38	83.56	76.29	227.3	251.1	194.2	78.2	98.6	67.6	78.1
SSEMSPVPMR	1xPhospho [S5]	Q8TEU7	Rap guanine nucleotide exchange factor 6 OS=Homo sapiens OX=9606 GN=RAPGEF6 PE=1 SV=2	0.868	0.146	0.72	0.555	0.089	0.639	0.614	0.77	0.124	-0.2	-2.78	-0.47	-0.85	-3.48	-0.65	-0.7	-0.38	-3.01	1	0.0214469	0.771369	0.598453	0.0429304	0.582813	0.998087	0.99951	0.33335	177.6	154.1	25.9	128	98.5	15.9	13.56	32.61	74.69	67.78	65.02	42.29	179.2	208.5	159.4	262.3	153.9	155.5	26.1
VEEGGRHPSPCQFTIATPK	1xPhospho [S9]; 1xCarbamidomethyl [C11]	O14686	Histone-lysine N-methyltransferase 2D OS=Homo sapiens OX=9606 GN=KMT2D PE=1 SV=2	0.191	0.146	0.189	0.405	0.193	2.127	1.318	2.148	1.02	-2.39	-2.78	-2.41	-1.3	-2.38	1.09	0.4	1.1	0.03	0.826177	0.222685	0.762962	0.751539	0.616079	0.999987	0.956654	1	0.999779	282.6	53.8	41.3	53.3	114.6	54.4	22.31	105.68	118.72	79.67	58.92	117.16	229.7	273.7	173.3	32.1	215.2	43.8	122.7
TASSPDSLR	1xPhospho [S7]	Q9UIW2	Plexin-A1 OS=Homo sapiens OX=9606 GN=PLXNA1 PE=1 SV=3	2.402	0.146	1.873	2.607	2.441	1.086	16.707	1.392	1.303	1.26	-2.77	0.91	1.38	1.29	0.12	4.06	0.48	0.38	0.939277	0.130711	0.899531	0.589086	0.808191	0.972206	0.0165366	0.98781	0.999917	57.3	137.6	8.4	107.3	149.4	139.9	49.65	59.39	128.61	32.05	19.38	37.88	55.6	96.7	35.7	178.5	133.5	41.3	8.1
SSDRNPPLSPQSSIDSELSASELDEDSIGSNYK	1xPhospho [S]; 1xDeamidated [Q11]	Q9P270	SLAIN motif-containing protein 2 OS=Homo sapiens OX=9606 GN=SLAIN2 PE=1 SV=2	0.037	0.146	1.429	0.125	0.27	3.35	1.849	0.087	0.189	-4.75	-2.77	0.52	-3	-1.89	1.74	0.89	-3.52	-2.4	0.0077369	0.490837	0.999587	0.358491	0.984735	0.233208	0.842207	0.237979	0.926597	199.5	7.4	29.2	285.1	24.9	53.9	60.86	78.78	13.46	65.21	6.85	125.68	211	236.3	50.2	7.9	0.7	9.7	36.1
TLYRQSLPPLAK	1xPhospho [S/T/Y]	Q8NHQ8	Ras association domain-containing protein 8 OS=Homo sapiens OX=9606 GN=RASSF8 PE=1 SV=2	0.298	0.146	1.909	1.094	0.158	3.666	1.082	0.573	0.083	-1.74	-2.77	0.93	0.13	-2.66	1.87	0.11	-0.8	-3.59	0.0433808	0.000316221	0.314801	0.996771	0.00171824	0.0199749	0.861488	0.546647	7.48725e-05	130.3	38.9	19.1	248.7	142.5	20.6	28.18	44.62	41.61	18.04	3.45	56.64	160.8	130.7	89.5	39	32.2	72	27.5
REFITGDVEPTDAESEWHSENEEEEKLAGDMK	1xPhospho [S19]; 1xDeamidated [N21]	Q99733	Nucleosome assembly protein 1-like 4 OS=Homo sapiens OX=9606 GN=NAP1L4 PE=1 SV=1	0.485	0.147	10.016	1.371	9.469	2.825	64.624	0.137	0.945	-1.04	-2.77	3.32	0.45	3.24	1.5	6.01	-2.87	-0.08	0.998356	0.945861	0.954003	0.998239	0.855237	0.961682	0.388234	0.997501	0.999566	26.7	12.9	3.9	267.2	36.6	252.7	13.03	65.83	167.02	87.25	119.27	71.72	31.8	27.2	24.6	9.8	13.2	32.3	4
LEPVYSPPGSPPPGDPR	1xPhospho [S]	O75676	Ribosomal protein S6 kinase alpha-4 OS=Homo sapiens OX=9606 GN=RPS6KA4 PE=1 SV=1	1.086	0.147	1.071	1.011	1.062	0.931	7.248	0.944	0.992	0.12	-2.77	0.1	0.02	0.09	-0.1	2.86	-0.08	-0.01	0.958916	0.127172	0.999903	1	1	0.950372	0.142744	0.999962	0.999607	111.6	121.2	16.4	119.5	112.8	118.5	24.03	72.69	125.03	20.04	9.11	17.53	110.5	144.2	89.6	144	16.3	119.9	4
GDSESEEDEDLEVPVPSR	2xPhospho [S3; S5]	P13861	cAMP-dependent protein kinase type II-alpha regulatory subunit OS=Homo sapiens OX=9606 GN=PRKAR2A PE=1 SV=2	0.808	0.147	0.817	0.792	0.694	0.981	4.731	0.969	0.849	-0.31	-2.77	-0.29	-0.34	-0.53	-0.03	2.24	-0.04	-0.24	0.999949	0.483235	0.768621	0.977602	0.965484	0.994734	0.892092	0.987651	0.993193	140.9	113.8	20.7	115.2	111.6	97.8	29.26	3.86	98.04	83.68	63.63	64.01	187.3	150.1	101.8	126	121.2	116.6	22
MPVSSQHRYSTPHAFTFNTSSPSSEGSLSQR	1xPhospho [S/T/Y]	P04049	RAF proto-oncogene serine/threonine-protein kinase OS=Homo sapiens OX=9606 GN=RAF1 PE=1 SV=1	1.026	0.147	1.804	1.169	0.15	1.139	1.024	0.648	0.083	0.04	-2.77	0.85	0.23	-2.74	0.19	0.03	-0.63	-3.59	0.825104	1	0.668207	0.994939	0.999999	0.978119	0.999991	0.909777	0.721979	113.3	116.3	16.6	204.3	132.5	17	85.68	22.66	92	33.09	88.45	123.21	119.3	133.3	1.3	122.5	154.4	97.9	17.5
GTAYWYPPGSAARSPPYEGK	1xPhospho [S]	Q5TGY3	Transcription factor Gibbin OS=Homo sapiens OX=9606 GN=AHDC1 PE=1 SV=1	0.155	0.147	0.535	0.642	0.615	4.134	4.183	1.201	1.151	-2.69	-2.77	-0.9	-0.64	-0.7	2.05	2.06	0.26	0.2	0.969041	0.984525	0.996276	0.98353	1	0.716035	0.985407	0.859431	0.996581	193.9	30.1	28.5	103.7	124.5	119.3	84.56	39.07	99.95	80.78	28.11	72.54	276	228.5	6.3	19.9	46.3	35.5	12.5
FSGWYDADLSPAGHEEAKR	1xPhospho [S10]	P18669	Phosphoglycerate mutase 1 OS=Homo sapiens OX=9606 GN=PGAM1 PE=1 SV=2	0.21	0.148	0.16	0.157	0.172	0.749	1.169	0.984	1.081	-2.25	-2.76	-2.65	-2.67	-2.54	-0.42	0.22	-0.02	0.11	0.997699	0.999833	0.999399	0.999886	1	0.999945	0.99997	0.992423	0.999828	325	68.1	47.9	51.9	51	56	87.34	126.63	30.45	37.63	121.78	20.38	272.8	335.3	1.5	388.9	28.5	57.2	50.5
IDENSDKEMEVEESPEKIK	1xDeamidated [N4]; 2xPhospho [S5; S14]	Q8N3X1	Formin-binding protein 4 OS=Homo sapiens OX=9606 GN=FNBP4 PE=1 SV=3	0.145	0.148	0.939	0.723	0.291	5	1.972	0.77	0.31	-2.79	-2.76	-0.09	-0.47	-1.78	2.32	0.98	-0.38	-1.69	0.557287	0.978941	0.99319	1	0.876266	0.578116	0.998432	0.990836	0.596282	184.9	26.7	27.3	173.7	133.6	53.8	71.03	86.74	131.45	23.33	66.61	116.16	23.9	192.1	176.1	2	42	25.5	26
FFAPRSPSRDKEEEEEERPGTSPPPAPGR	1xPhospho [S]	Q68DQ2	Very large A-kinase anchor protein OS=Homo sapiens OX=9606 GN=CRYBG3 PE=1 SV=3	0.864	0.148	0.823	1.979	3.146	2.29	21.257	2.405	3.822	-0.21	-2.76	-0.28	0.98	1.65	1.2	4.41	1.27	1.93	0.807961	0.122316	0.76872	0.999503	0.984591	0.93001	0.0421363	0.905506	0.410781	75.4	65.1	11.2	62	149.2	237.1	116.07	46.19	78.14	117.88	69.55	18.68	53.9	58.9	400	19.2	50.9	53.3	8.7
TPLSFTNPLHSDDSDSDERNSDGAVTQNK	2xPhospho [S14; S]; 1xDeamidated [N]	Q05209	Tyrosine-protein phosphatase non-receptor type 12 OS=Homo sapiens OX=9606 GN=PTPN12 PE=1 SV=3	0.328	0.148	0.938	0.325	0.378	0.991	2.553	0.346	0.403	-1.61	-2.76	-0.09	-1.62	-1.4	-0.01	1.35	-1.53	-1.31	0.999479	0.999999	0.999773	0.999935	0.999666	0.999997	0.998752	0.996425	1	192.5	63.1	28.5	180.6	62.5	72.7	76.05	155.2	157.82	72.67	101.61	121.15	108.7	87.9	9.6	2.2	410	28.8	401.2
TNTPQGVLPSSQLK	1xPhospho [T3]	Q14004	Cyclin-dependent kinase 13 OS=Homo sapiens OX=9606 GN=CDK13 PE=1 SV=2	0.082	0.148	0.928	0.752	0.117	9.228	0.789	0.811	0.126	-3.62	-2.75	-0.11	-0.41	-3.1	3.21	-0.34	-0.3	-2.99	0.922143	0.876895	0.999998	1	0.880895	0.901839	1	1	0.839223	198.2	16.2	29.4	183.9	149.1	23.2	79.39	129.63	90.4	72.19	63.24	49.29	14.8	228.1	257	17.3	178.3	18.6	33.8
ESESALMEDRDESEVSDEGGSPISSEGQEPR	2xPhospho [S13; S16]; 1xDeamidated [Q28]	O14976	Cyclin-G-associated kinase OS=Homo sapiens OX=9606 GN=GAK PE=1 SV=2	0.739	0.148	0.16	0.05	0.169	0.068	1.138	0.312	1.055	-0.44	-2.75	-2.64	-4.32	-2.57	-3.89	0.19	-1.68	0.08	0.98608	0.208364	0.542995	0.0493359	0.570112	0.138618	0.963674	0.588329	1	264.8	195.6	39.3	42.4	13.2	44.7	11.15	69.72	120.96	119.97	50.91	84.99	228.6	196	244.9	44.6	168.9	267.9	33.9
NGGLEHVPSSSSIHNGDMEK	2xPhospho [S]	O60238	BCL2/adenovirus E1B 19 kDa protein-interacting protein 3-like OS=Homo sapiens OX=9606 GN=BNIP3L PE=1 SV=1	0.673	0.148	0.802	0.584	0.728	0.868	4.903	0.728	0.907	-0.57	-2.75	-0.32	-0.78	-0.46	-0.2	2.29	-0.46	-0.14	0.990909	0.123589	0.999275	0.804413	0.707726	0.981421	0.741753	0.935034	0.872804	152.5	102.6	22.6	122.3	89	111	11.91	12.7	119.28	11.38	44.57	68.61	134.5	170.9	156.5	123.4	105.3	96.4	7.8
APEGDDFLSLHAESDGEGALQVDLGEPAPAPPAADSR	1xPhospho [S]; 1xDeamidated [Q21]	Q9H7N4	Splicing factor, arginine/serine-rich 19 OS=Homo sapiens OX=9606 GN=SCAF1 PE=1 SV=3	1.226	0.149	1.347	1.106	1.081	0.902	7.279	0.821	0.802	0.29	-2.75	0.43	0.15	0.11	-0.15	2.86	-0.28	-0.32	0.858805	0.999755	0.999902	0.896274	0.899783	0.999999	0.781942	0.959156	0.96113	101.5	124.5	15.1	136.8	112.3	109.8	83.12	11.59	125.44	84.87	14.76	21.25	4.6	105.1	130.5	128.9	140	110.9	15.6
FLEESVSMSPEER	1xPhospho [S9]	P15374	Ubiquitin carboxyl-terminal hydrolase isozyme L3 OS=Homo sapiens OX=9606 GN=UCHL3 PE=1 SV=1	0.875	0.149	0.865	0.728	0.921	0.833	6.197	0.841	1.064	-0.19	-2.75	-0.21	-0.46	-0.12	-0.26	2.63	-0.25	0.09	0.54592	0.0906671	0.999902	0.876279	0.999992	0.986543	0.112716	0.947439	0.999999	132.2	115.6	19.6	114.4	96.3	121.7	15.68	78.64	41.11	5.94	53.26	17.05	143.2	121.7	166.8	8.1	125.2	130.4	17.1
LPSSSSEMGSQDGSPLR	1xPhospho [S3]; 1xDeamidated [Q11]	Q9UJ14	Glutathione hydrolase 7 OS=Homo sapiens OX=9606 GN=GGT7 PE=1 SV=2	0.162	0.149	0.132	0.283	0.208	1.75	1.398	2.138	1.575	-2.63	-2.75	-2.92	-1.82	-2.26	0.81	0.48	1.1	0.66	0.338247	0.817331	0.699262	0.989073	0.933194	0.657695	0.999563	0.951467	0.993878	310.1	50.1	46.2	41.1	87.8	64.7	84.39	85.35	35.56	87.15	14.54	31.04	317.1	23.5	476.8	51.3	81.2	4.1	80.1
IEHAPSPSSGGTLK	1xPhospho [S]	Q14004	Cyclin-dependent kinase 13 OS=Homo sapiens OX=9606 GN=CDK13 PE=1 SV=2	1.667	0.149	1.06	1.042	0.588	0.625	3.939	0.983	0.554	0.74	-2.74	0.08	0.06	-0.77	-0.68	1.98	-0.03	-0.85	0.645414	0.00216999	0.996063	0.963682	0.993593	0.970596	0.00512881	0.999487	0.90522	109	181.7	16.3	115.5	113.5	64	44.43	11.81	65.09	23.14	49.65	44.74	52.2	99.9	138	166.5	150.5	190.2	14.9
HETSDHEAEEPDCIISEAPTSPLGHLTSEYDTDR	1xCarbamidomethyl [C13]; 1xPhospho [S/T]	Q6XZF7	Dynamin-binding protein OS=Homo sapiens OX=9606 GN=DNMBP PE=1 SV=1	0.572	0.149	0.966	0.347	4.234	0.607	28.376	0.359	4.382	-0.81	-2.74	-0.05	-1.53	2.08	-0.72	4.83	-1.48	2.13	0.69479	0.0811525	0.993843	0.717424	0.695323	1	0.00705514	0.423064	0.9314	82.5	47.2	12.3	79.8	28.7	349.5	8.65	78.7	76.89	91	41.29	61.6	74.1	85	87.4	48.6	76.3	7.4	12.7
NKRDSTEITSILLK	1xDeamidated [N1]; 1xPhospho [S/T]	Q8IYU2	E3 ubiquitin-protein ligase HACE1 OS=Homo sapiens OX=9606 GN=HACE1 PE=1 SV=2	0.664	0.149	0.152	0.781	0.112	1.177	0.752	5.139	0.739	-0.59	-2.74	-2.72	-0.36	-3.15	0.24	-0.41	2.36	-0.44	0.982222	0.794494	0.951471	0.999915	0.446044	0.996991	0.98642	0.986002	0.891542	209.9	139.3	31.4	31.9	164	23.6	69.78	79.75	69.27	98.2	84.34	31.9	33.1	235.7	241.9	10.4	156.5	183.9	80.5
SQSASVESIPEVLEECTSPADHSDSASVHDMDYVNPR	1xCarbamidomethyl [C16]; 1xPhospho [S]	Q92538	Golgi-specific brefeldin A-resistance guanine nucleotide exchange factor 1 OS=Homo sapiens OX=9606 GN=GBF1 PE=1 SV=3	1.046	0.15	0.502	0.337	13.068	0.322	87.299	0.671	26.045	0.07	-2.74	-0.99	-1.57	3.71	-1.64	6.45	-0.58	4.7	0.995869	0.95021	0.999232	1	0.969392	0.997668	0.604504	0.999677	0.99788	37.3	39	5.6	18.7	12.5	486.9	14.74	129.18	119.32	165.56	160.81	109.08	14	17.2	18.9	167.8	16.3	18	2.6
RATLDEEDLVDSLSEGDAYPNGLQVNFHSPR	1xPhospho [T3]; 2xDeamidated [N21; N26]	P42892	Endothelin-converting enzyme 1 OS=Homo sapiens OX=9606 GN=ECE1 PE=1 SV=2	0.761	0.15	0.065	0.094	0.126	0.124	0.839	1.455	1.937	-0.39	-2.74	-3.95	-3.4	-2.99	-3.01	-0.25	0.54	0.95	0.830668	0.0689128	0.00524433	0.0362284	0.0140701	0.245615	0.926799	0.850124	0.989604	273.3	208	40.9	17.7	25.8	34.3	37.38	73.75	22.72	46.95	28.48	70.24	386.3	305	172.9	33.3	232.1	302.5	30.4
QQLSPSPGQEAGILPETEK	1xPhospho [S/T]; 1xDeamidated [Q]	Q17RY0	Cytoplasmic polyadenylation element-binding protein 4 OS=Homo sapiens OX=9606 GN=CPEB4 PE=1 SV=1	1.058	0.15	1.012	1.176	0.794	1.112	5.293	1.163	0.784	0.08	-2.74	0.02	0.23	-0.33	0.15	2.4	0.22	-0.35	0.935644	0.951851	1	0.871352	0.999706	0.999956	0.861072	0.844186	0.9992	115.6	122.3	17.3	117	136	91.7	78.54	9.13	110.43	74.44	15.03	74.23	156.3	11.3	121.3	114.3	128.3	137.2	14.4
KHSQLFTAPVPEGPTSPR	1xPhospho [S/T]	Q7Z5H3	Rho GTPase-activating protein 22 OS=Homo sapiens OX=9606 GN=ARHGAP22 PE=1 SV=1	0.446	0.15	0.189	3.191	4.839	7.153	32.218	16.87	25.583	-1.16	-2.73	-2.4	1.67	2.27	2.84	5.01	4.08	4.68	0.760504	0.918832	0.978323	1	0.923817	0.738495	0.433333	0.972356	0.581914	61.1	27.3	9.2	11.6	195.1	295.8	64.78	79.34	167.26	147.57	83.84	15.8	48.8	33.1	112.4	1.3	22	21.8	358.6
HVAYGGYSTPEDR	1xPhospho [S/T/Y]	Q9HBL0	Tensin-1 OS=Homo sapiens OX=9606 GN=TNS1 PE=1 SV=3	1.093	0.15	0.672	0.802	0.327	0.733	2.176	1.193	0.487	0.13	-2.73	-0.57	-0.32	-1.61	-0.45	1.12	0.25	-1.04	0.998766	0.0394834	0.995426	0.999929	0.301798	0.990283	0.783879	0.999666	0.549196	148.3	162.2	22.3	99.7	118.9	48.5	22.94	5.73	113.92	26.45	14.62	23.45	138.2	153.7	96.3	155.1	151.1	138.8	11.8
RASAGPAPGPVVTAEGLHPSLPSPTGNSTPLGSSK	1xPhospho [S3]	Q4KMP7	TBC1 domain family member 10B OS=Homo sapiens OX=9606 GN=TBC1D10B PE=1 SV=3	0.975	0.151	0.136	2.448	0.149	2.511	0.989	18.001	1.095	-0.04	-2.73	-2.88	1.29	-2.75	1.33	-0.02	4.17	0.13	1	0.86881	0.968092	0.999895	0.972088	0.999614	0.998912	0.993091	1	123.5	120.4	18.6	16.8	302.3	18.4	41.63	72.47	150.31	154.23	83.02	163.34	73.4	57.3	125.3	51.2	71.5	191.8	3.2
IQALGLHLPDPPLESEDEDEEGATALNNHSSIPMDPEHVELVK	1xPhospho [S15]; 1xDeamidated [N]	Q16626	Male-enhanced antigen 1 OS=Homo sapiens OX=9606 GN=MEA1 PE=1 SV=2	6.586	0.151	1.755	7.589	2.044	1.152	13.568	4.325	1.165	2.72	-2.73	0.81	2.92	1.03	0.2	3.76	2.11	0.22	0.844575	0.740843	0.996167	0.504528	0.845835	0.986673	0.187869	0.771941	0.980196	31.4	206.6	4.7	55.1	238.1	64.1	63.34	87.33	39.17	127.66	64.71	55.47	32.2	7.4	39	7.4	307.6	212	4.8
TIASDSEEEAGKELSDKKNEEK	2xPhospho [S4; S6]	Q96ST2	Protein IWS1 homolog OS=Homo sapiens OX=9606 GN=IWS1 PE=1 SV=2	0.788	0.151	0.9	0.655	0.47	0.832	3.121	0.728	0.522	-0.34	-2.73	-0.15	-0.61	-1.09	-0.27	1.64	-0.46	-0.94	0.995469	0.426657	0.999991	0.614911	0.984933	0.870918	0.783177	0.693935	0.994944	151.4	119.2	22.8	136.2	99.2	71.2	18.02	34.18	128.8	11.4	85.7	61.86	120.3	148.4	173.4	116.9	119.2	59.7	22.4
APVSSTESVIQSNTPTPPPSQPLNETAEEESR	2xPhospho [T14; T]	Q9HC35	Echinoderm microtubule-associated protein-like 4 OS=Homo sapiens OX=9606 GN=EML4 PE=1 SV=3	0.118	0.151	0.159	0.131	0.948	1.115	6.286	0.822	5.943	-3.09	-2.73	-2.65	-2.93	-0.08	0.16	2.65	-0.28	2.57	0.745593	0.696079	0.94886	0.93671	0.741265	0.996885	0.999999	1	0.994663	239.4	28.1	36.1	38.2	31.4	226.9	46.93	12.07	65.66	138.74	143.07	87.03	289.9	198.6	104.4	24.9	23.3	19.6	6.6
ISTYGLPAGGIQPHPQTK	1xPhospho [S/T/Y]	Q9Y5K6	CD2-associated protein OS=Homo sapiens OX=9606 GN=CD2AP PE=1 SV=1	0.061	0.151	1.495	0.839	0.145	13.862	0.962	0.561	0.097	-4.05	-2.73	0.58	-0.25	-2.78	3.79	-0.06	-0.83	-3.36	0.364894	0.53382	0.999996	1	0.96125	0.399958	0.929506	0.999957	0.933824	162.6	9.8	24.5	243	136.4	23.6	67.72	42.94	93.28	79.38	70.56	140.33	182.5	29.5	192.2	11	7	17	2.5
ESDKEEPVTPTSGGGPMSPQDDEAEEESDNELSSGTGDVSK	1xDeamidated [N/Q]; 1xPhospho [S28]	Q5R372	Rab GTPase-activating protein 1-like OS=Homo sapiens OX=9606 GN=RABGAP1L PE=1 SV=1	0.759	0.151	1.003	0.875	0.462	1.153	3.06	0.872	0.461	-0.4	-2.73	0	-0.19	-1.11	0.2	1.61	-0.2	-1.12	0.999799	0.203755	0.746801	0.999972	0.811724	0.999999	0.806839	0.833399	0.999994	141.2	107.2	21.3	141.6	123.5	65.3	27.64	19.21	7.17	83.18	23.79	57.77	179.8	159.2	101.5	142	96.1	120.8	21.4
RGETESEEFEKLK	1xPhospho [S/T]	Q05682	Caldesmon OS=Homo sapiens OX=9606 GN=CALD1 PE=1 SV=3	0.346	0.151	0.6	0.444	0.283	1.281	1.87	0.74	0.472	-1.53	-2.73	-0.74	-1.17	-1.82	0.36	0.9	-0.43	-1.08	0.102412	0.000163539	0.927358	0.22557	0.00383884	0.994715	0.349043	0.687281	0.0183928	212.5	73.6	32.1	127.4	94.3	60.1	33.54	34.96	33.41	26.94	27.49	32.7	120.6	245.7	208.2	65.6	120.7	72.1	18
NSNSYGIPEPAHAYAQPQTTTPLPAVSGSPGAAITPLPSTQNGPVFAK	3xDeamidated [N42; N/Q]; 1xPhospho [S/T/Y]	P46109	Crk-like protein OS=Homo sapiens OX=9606 GN=CRKL PE=1 SV=1	1.498	0.152	0.125	1.219	1.342	0.814	8.851	9.72	10.702	0.58	-2.72	-3	0.29	0.42	-0.3	3.15	3.28	3.42	0.999795	0.999992	1	0.989203	0.999916	0.999242	0.999999	0.987508	0.99987	112.4	168.5	17	14.1	137.1	150.9	87.09	85.86	116.61	134.1	70.36	91	1.1	158.3	127.9	218.3	2.1	191.6	17.4
LLEENETEAVTVPTPSPTPVR	1xPhospho [S/T]	Q9UHR4	BAR/IMD domain-containing adapter protein 2-like 1 OS=Homo sapiens OX=9606 GN=BAIAP2L1 PE=1 SV=2	3.832	0.152	0.143	0.043	0.326	0.011	2.149	0.302	2.278	1.94	-2.72	-2.81	-4.53	-1.62	-6.47	1.1	-1.73	1.19	1	0.860722	0.120865	0.149828	0.768263	0.154119	0.99995	0.999991	0.671725	109.2	418.4	16.6	15.6	4.7	35.6	79.87	82.88	154.76	84.61	25.51	67.01	320.3	79.3	101.1	442.6	387.5	14	296.2
ATSNVFAMFDQSQIQEFK	1xPhospho [S/T]; 1xDeamidated [N/Q]	P24844; O14950	Myosin regulatory light polypeptide 9 OS=Homo sapiens OX=9606 GN=MYL9 PE=1 SV=4 Myosin regulatory light chain 12B OS=Homo sapiens OX=9606 GN=MYL12B PE=1 SV=2	0.723	0.152	0.116	0.748	0.135	1.034	0.891	6.426	1.161	-0.47	-2.72	-3.1	-0.42	-2.89	0.05	-0.17	2.68	0.22	0.99868	0.77691	0.913604	0.999886	0.904579	0.999986	0.999631	0.821119	1	208.7	151	31.7	24.3	156.1	28.2	70.68	146.09	132.8	132.6	9.57	126.91	115.9	131.7	16.8	83.8	16.8	849.7	17.6
QEVNPVRQEIESETTSEEQIQEEK	1xDeamidated [N/Q]; 1xPhospho [S/T]	P13611	Versican core protein OS=Homo sapiens OX=9606 GN=VCAN PE=1 SV=3	0.916	0.152	1.146	0.827	0.975	0.903	6.409	0.722	0.851	-0.13	-2.72	0.2	-0.27	-0.04	-0.15	2.68	-0.47	-0.23	0.914112	0.0111101	0.99989	0.892292	0.950283	1	0.0469955	0.792032	0.878949	119.6	109.5	18.2	137	98.9	116.7	89.52	2.94	88.62	109.37	22.51	2.76	323.5	76.5	77.2	70.7	72.3	68.2	29.5
SSLPLDHGSPAQENPESEK	1xPhospho [S]	Q5VZ89	DENN domain-containing protein 4C OS=Homo sapiens OX=9606 GN=DENND4C PE=1 SV=3	0.789	0.153	1.52	1.25	1.77	1.585	11.566	0.823	1.165	-0.34	-2.71	0.6	0.32	0.82	0.66	3.53	-0.28	0.22	0.967997	0.541341	0.853603	0.933937	0.701952	0.56328	0.0683919	0.999897	0.999579	92.6	73	14.2	140.7	115.7	163.8	54.02	71.7	107.92	26.22	9.11	17.92	112	97.8	30.9	11.9	96.9	77.2	15
DRSPPKSPEKLPQSSSSESSPPSPQPTK	3xPhospho [S]	Q9UQ35	Serine/arginine repetitive matrix protein 2 OS=Homo sapiens OX=9606 GN=SRRM2 PE=1 SV=2	0.997	0.153	1.086	1.005	0.509	1.009	3.322	0.926	0.468	0	-2.71	0.12	0.01	-0.98	0.01	1.73	-0.11	-1.09	1	0.561806	1	1	0.402905	0.999996	0.999613	0.999998	0.429497	126.3	125.9	19.3	137.2	127	64.2	19.49	10.57	122.42	31.63	15.16	91.09	123.4	152	103.1	126.3	123	103.3	18.9
TAPAAPAEDAVAAAAAAPSEPSEPSRPSPQPKPRTP	1xDeamidated [Q30]; 1xPhospho [S/T]	Q53GA4	Pleckstrin homology-like domain family A member 2 OS=Homo sapiens OX=9606 GN=PHLDA2 PE=1 SV=2	1.438	0.153	1.628	0.22	0.199	0.153	1.3	0.135	0.122	0.52	-2.71	0.7	-2.19	-2.33	-2.71	0.38	-2.89	-3.03	0.863854	0.885665	0.794372	0.987911	0.496951	0.537134	0.97264	0.454485	0.0798147	129.4	186.1	19.8	210.6	28.4	25.8	66.9	19.62	123.72	22.07	109.55	69.94	126	139.2	22.2	187.1	181.2	128.1	142.4
RLSSLRASTSKSESSQK	3xPhospho [S/T]	P62753	Small ribosomal subunit protein eS6 OS=Homo sapiens OX=9606 GN=RPS6 PE=1 SV=1	0.756	0.154	0.688	0.534	0.055	0.706	0.358	0.776	0.08	-0.4	-2.7	-0.54	-0.91	-4.18	-0.5	-1.48	-0.37	-3.64	0.769668	1.52806e-06	0.351357	0.0424285	5.38495e-09	0.33171	0.000112103	0.746454	1.98397e-08	188.3	142.4	29	129.5	100.5	10.4	23.27	15.52	11.42	3.04	26.56	26.26	185	140.3	225.8	139.9	171.2	127.1	33.2
DSPSKSSAEAQTPEDTPNKSGAEAK	1xPhospho [S]	O43493	Trans-Golgi network integral membrane protein 2 OS=Homo sapiens OX=9606 GN=TGOLN2 PE=1 SV=4	0.165	0.154	0.493	0.743	0.783	4.511	5.077	1.508	1.589	-2.6	-2.7	-1.02	-0.43	-0.35	2.17	2.34	0.59	0.67	0.987231	0.997323	0.999982	0.998514	0.99079	0.905732	0.903019	0.99988	0.997901	179.7	29.6	27.7	88.6	133.6	140.8	87.1	86.13	132.87	56.96	74.06	87.02	240.7	3.7	179.4	8.6	29.6	69.3	6.6
SPSPLLGHSLGNSK	1xPhospho [S]	O15021	Microtubule-associated serine/threonine-protein kinase 4 OS=Homo sapiens OX=9606 GN=MAST4 PE=1 SV=4	0.943	0.154	0.782	0.743	0.257	0.788	1.662	0.95	0.328	-0.08	-2.7	-0.35	-0.43	-1.96	-0.34	0.73	-0.07	-1.61	0.999727	0.00321191	0.88107	0.814062	0.153747	0.923066	0.251917	0.999984	0.619291	154.7	145.9	23.9	120.9	114.9	39.7	19.34	8.16	73.5	33.51	35.4	63.69	132.2	194.1	157.1	148.2	150.6	129.3	8.1
VGLSPDSPAGDRNSVGSEGSVGSIR	1xDeamidated [N13]; 1xPhospho [S14]	Q8WXE0	Caskin-2 OS=Homo sapiens OX=9606 GN=CASKIN2 PE=1 SV=2	0.058	0.155	1.155	0.113	0.097	1.932	0.63	0.097	0.084	-4.1	-2.69	0.21	-3.15	-3.36	0.95	-0.67	-3.36	-3.57	0.0306322	0.569867	0.969926	0.472631	0.0706018	0.500356	0.684536	0.874785	0.23168	232.8	13.6	36	268.8	26.2	22.7	26.94	37.28	112.95	74.62	131.6	40.99	268	154.8	207.8	12.1	18.6	9	201.4
SGTSSPQSPVFR	2xPhospho [S5; S8]	Q8N556	Actin filament-associated protein 1 OS=Homo sapiens OX=9606 GN=AFAP1 PE=1 SV=2	0.158	0.155	0.47	0.673	0.409	4.257	2.643	1.433	0.87	-2.66	-2.69	-1.09	-0.57	-1.29	2.09	1.4	0.52	-0.2	0.847909	0.614723	0.971245	0.992683	0.999095	0.988219	0.806791	0.999942	0.998376	209.5	33.1	32.4	98.4	141	85.6	72.85	107.12	147.22	44.66	47.17	85.56	45.9	285.7	162.2	145.7	25.7	24.1	25.1
ASGDGESLDEDSEFTLASDFEIGHFFR	1xPhospho [S/T]	Q99733	Nucleosome assembly protein 1-like 4 OS=Homo sapiens OX=9606 GN=NAP1L4 PE=1 SV=1	0.635	0.155	0.349	0.361	0.929	0.569	6.002	1.035	2.663	-0.66	-2.69	-1.52	-1.47	-0.11	-0.81	2.59	0.05	1.41	0.997213	0.997525	0.999998	0.999915	0.996853	0.999888	0.941574	0.999996	0.999043	175.1	111.1	27.1	61	63.2	162.5	83.92	62.75	122.69	92.6	103.03	66.93	198.9	159.2	6	41.5	173.5	101.1	156.3
NKPLSPIKLTPTSVLDYFGTGSVQR	1xDeamidated [N1]; 1xPhospho [S/T]	P35251	Replication factor C subunit 1 OS=Homo sapiens OX=9606 GN=RFC1 PE=1 SV=4	0.077	0.155	0.084	0.166	0.178	2.157	1.153	1.984	2.133	-3.7	-2.69	-3.58	-2.59	-2.49	1.11	0.2	0.99	1.09	0.560364	0.98666	0.553685	0.909801	0.974825	0.97915	0.999998	0.977591	0.916183	361.4	27.8	56	30.2	60	64.5	81.64	68.76	121.43	42.09	138.78	130.5	354.7	24.4	235.4	18.1	13.1	45.8	36.4
LERSPVDESGDEVQYGDVPVENGMAPFFEMK	1xPhospho [S4]	Q8WX93	Palladin OS=Homo sapiens OX=9606 GN=PALLD PE=1 SV=3	0.896	0.155	0.893	1.071	0.903	1.195	5.829	1.2	1.012	-0.16	-2.69	-0.16	0.1	-0.15	0.26	2.54	0.26	0.02	0.999026	0.269567	0.87827	0.955759	0.998897	0.99626	0.434506	0.999813	0.975805	122	109.3	18.9	108.9	130.7	110.2	28.2	4.55	119.81	66.31	68.93	12.73	183.2	122.5	110.1	109.8	111.5	102.3	124.5
LIRPEYAWIVQPVSGAVYDRPGASPKR	1xPhospho [S24]	Q12769	Nuclear pore complex protein Nup160 OS=Homo sapiens OX=9606 GN=NUP160 PE=1 SV=3	0.08	0.155	1.19	1.627	0.058	20.39	0.377	1.367	0.049	-3.65	-2.69	0.25	0.7	-4.1	4.35	-1.41	0.45	-4.35	0.972732	0.998008	0.999999	0.947715	0.966685	0.610274	0.998973	0.966438	0.948045	146	11.6	22.6	173.8	237.5	8.5	90.18	150.8	134.23	85	32.51	165.02	7.6	103.9	186.6	8.3	5.8	148.8	16.1
LGGDEDGYEEEEDENSRQSEDDDSETEKPEADDPK	2xPhospho [S/T/Y]	Q9UHR5	SAP30-binding protein OS=Homo sapiens OX=9606 GN=SAP30BP PE=1 SV=1	0.374	0.156	0.544	0.751	0.069	2.008	0.441	1.379	0.126	-1.42	-2.68	-0.88	-0.41	-3.86	1.01	-1.18	0.46	-2.99	0.615862	0.0778119	0.443505	0.942648	0.0094581	0.977168	0.802615	0.902919	0.216249	207.3	77.5	32.3	112.9	155.7	14.3	51.81	16.99	86.42	70.5	49.2	44.57	216	350.4	115.7	80.8	68.2	95.9	87.8
ETQSTPQSAPQVR	1xPhospho [S8]	Q9UJF2	Ras GTPase-activating protein nGAP OS=Homo sapiens OX=9606 GN=RASAL2 PE=1 SV=2	1.004	0.156	0.52	0.351	0.212	0.35	1.36	0.676	0.408	0.01	-2.68	-0.94	-1.51	-2.24	-1.52	0.44	-0.57	-1.29	0.999932	0.00440828	0.675502	0.198248	0.00861859	0.267713	0.998193	0.906182	0.104511	185	185.8	28.8	96.1	65	39.2	32.87	9.4	69.56	23.45	17.76	67.26	177.2	134.8	257.7	178.8	150.9	178	12.3
RPSLPSSPSPGLPK	2xPhospho [S3; S6]	O43294	Transforming growth factor beta-1-induced transcript 1 protein OS=Homo sapiens OX=9606 GN=TGFB1I1 PE=1 SV=2	0.144	0.156	1.185	1.092	1.233	7.591	7.916	0.922	1.04	-2.8	-2.68	0.25	0.13	0.3	2.92	2.98	-0.12	0.06	0.743569	0.605731	0.631418	0.963809	0.658691	0.321651	0.0726207	0.966286	1	124.7	17.9	19.4	147.8	136.2	153.8	84.46	38.25	43.9	10.64	59.8	15.96	186.6	133.7	7.2	32.8	19.2	16.5	28.1
DSDQVAQSDGEESPAAEEQLLGEHIK	1xPhospho [S]	O94979	Protein transport protein Sec31A OS=Homo sapiens OX=9606 GN=SEC31A PE=1 SV=3	0.242	0.156	0.254	0.23	0.201	0.949	1.286	0.904	0.788	-2.05	-2.68	-1.97	-2.12	-2.32	-0.08	0.36	-0.15	-0.34	0.939655	0.814197	0.999482	0.996642	0.730948	0.997498	0.99998	0.999986	0.880547	288.1	69.8	44.9	73.3	66.2	57.8	81.69	127.13	50.53	116.09	120.73	67.25	210.3	313.6	21	253.6	50.9	6.4	51.3
NGFPHPEPDCNPSEAASEESNSEIEQEIPVEQK	1xCarbamidomethyl [C10]; 2xPhospho [S20; S]	Q9NR30	Nucleolar RNA helicase 2 OS=Homo sapiens OX=9606 GN=DDX21 PE=1 SV=5	0.979	0.156	0.99	0.166	1.146	0.169	7.339	0.167	1.158	-0.03	-2.68	-0.01	-2.59	0.2	-2.56	2.88	-2.58	0.21	0.998272	0.579735	0.998249	0.797103	0.987327	0.94835	0.895614	0.948618	0.999916	135.2	132.4	21.1	133.9	22.4	155	21.34	79.13	136.85	78.24	136.5	79.97	106	129.4	162.3	126.7	20.8	207.7	135.2
SLDGAEFSRPASVSENHDAGPDGDKRDEDGESGGQR	2xPhospho [S]	Q9H4G0	Band 4.1-like protein 1 OS=Homo sapiens OX=9606 GN=EPB41L1 PE=1 SV=2	1.511	0.156	1.336	0.91	1.521	0.602	9.741	0.681	1.139	0.6	-2.68	0.42	-0.14	0.61	-0.73	3.28	-0.55	0.19	0.998607	0.274295	0.983252	1	0.999996	0.999411	0.231795	0.989257	0.993067	93.3	140.9	14.6	124.6	84.9	141.9	45.33	71.01	109.51	20.85	98.29	56.63	48.3	127.5	86.2	39.3	227	130.2	13.5
HSSETFSSTPSATR	1xPhospho [S3]	P35568	Insulin receptor substrate 1 OS=Homo sapiens OX=9606 GN=IRS1 PE=1 SV=1	0.883	0.156	0.783	0.985	0.185	1.115	1.183	1.258	0.236	-0.18	-2.68	-0.35	-0.02	-2.43	0.16	0.24	0.33	-2.08	0.999529	0.0488675	0.979516	1	0.0632704	0.999649	0.999984	0.981734	0.190758	150.2	132.7	23.5	117.7	148	27.8	13.52	6.83	107.8	23.25	10.05	84.97	127.5	147.2	167.3	130.3	130	115.4	23
KSSTGSPTSPLNAEKLESEEDVSQAFLEAVAEEKPHVKPYFSK	1xPhospho [S/T]	Q15746	Myosin light chain kinase, smooth muscle OS=Homo sapiens OX=9606 GN=MYLK PE=1 SV=4	0.325	0.157	0.496	0.362	0.712	1.113	4.535	0.731	1.435	-1.62	-2.67	-1.01	-1.47	-0.49	0.15	2.18	-0.45	0.52	0.0999641	0.00912586	0.429657	0.206041	0.473132	0.996609	0.192797	0.993013	0.999999	196.6	64	30.9	97.5	71.2	139.9	120.77	19.78	67.16	41.96	35.24	51.5	81.6	793.5	119.7	33.1	38.9	48.9	8.7
NTAPSPGPSVIR	1xPhospho [S5]	Q9H7P9	Pleckstrin homology domain-containing family G member 2 OS=Homo sapiens OX=9606 GN=PLEKHG2 PE=1 SV=3	1.103	0.157	0.851	0.683	0.64	0.619	4.065	0.803	0.752	0.14	-2.67	-0.23	-0.55	-0.64	-0.69	2.02	-0.32	-0.41	0.999999	0.0637305	0.999769	0.973595	0.74884	0.957034	0.470591	0.996469	0.874776	135.3	149.2	21.3	115.1	92.4	86.6	26.65	15.38	121.78	20.95	13.58	40.31	100.4	171.2	129.3	155.7	142.6	114.3	116.1
RVSSSSELDLPSGDHCEAGLLQLDVPLLR	1xPhospho [S]; 1xCarbamidomethyl [C16]	Q92614	Unconventional myosin-XVIIIa OS=Homo sapiens OX=9606 GN=MYO18A PE=1 SV=3	0.09	0.158	0.092	0.091	0.065	1.008	0.415	0.984	0.708	-3.47	-2.66	-3.44	-3.46	-3.93	0.01	-1.27	-0.02	-0.5	0.999612	0.99989	0.922883	0.858965	0.877255	0.954408	0.949296	0.99997	0.999993	400.9	36.1	63.2	37.1	36.5	26.2	95.03	163.08	156.82	153.06	76.62	24.93	300.2	4.9	161.3	14.5	535.8	7.2	471.4
SRSHTSEGAHLDITPNSGAAGNSAGPK	1xPhospho [S]	Q92597	Protein NDRG1 OS=Homo sapiens OX=9606 GN=NDRG1 PE=1 SV=1	1.192	0.158	0.631	1.209	0.489	1.014	3.099	1.916	0.775	0.25	-2.66	-0.66	0.27	-1.03	0.02	1.63	0.94	-0.37	0.943516	0.807519	0.991655	0.982387	0.970331	0.999917	0.995612	0.999998	0.999956	128.3	152.9	20.2	80.9	155	62.7	82.53	83.63	128.82	50.7	81.15	60.57	138.2	49	325.1	164.7	3.8	166.2	21.8
LPEGPVDSEDDEEEDEEIDRTDPLQGR	1xPhospho [S8]	Q8TEU7	Rap guanine nucleotide exchange factor 6 OS=Homo sapiens OX=9606 GN=RAPGEF6 PE=1 SV=2	0.078	0.158	0.337	0.333	0.176	4.253	1.114	0.988	0.521	-3.67	-2.66	-1.57	-1.58	-2.51	2.09	0.16	-0.02	-0.94	0.405907	0.356733	0.847453	0.890732	0.423611	0.931972	0.999991	0.999997	0.964947	288	22.6	45.5	97.2	96	50.7	65.6	148.88	32.28	15.33	2.26	34.2	254.9	339.9	60.4	333.4	20	14.5	32.4
THSTSSSLGSGESPFSR	2xPhospho [S5; S]	Q9UGV2	Protein NDRG3 OS=Homo sapiens OX=9606 GN=NDRG3 PE=1 SV=2	0.755	0.158	1.074	0.776	0.731	1.027	4.616	0.722	0.68	-0.41	-2.66	0.1	-0.37	-0.45	0.04	2.21	-0.47	-0.56	0.999984	0.0719084	0.999989	0.999978	0.999464	1	0.120028	0.999529	0.996805	133.5	100.8	21.1	143.4	103.6	97.5	18.4	21.41	118.13	20.56	18.68	4.62	95.6	135.8	132.5	90.8	100.1	134.9	21
VSDEVGFGLEHVSREQIR	1xPhospho [S13]	Q6VY07	Phosphofurin acidic cluster sorting protein 1 OS=Homo sapiens OX=9606 GN=PACS1 PE=1 SV=2	0.187	0.158	0.181	0.132	0.151	0.707	0.954	0.729	0.834	-2.42	-2.66	-2.47	-2.92	-2.73	-0.5	-0.07	-0.46	-0.26	0.00365355	0.000745495	0.00743305	0.00297896	0.00714386	0.999994	0.713375	0.99201	1	331.6	62	52.5	60.1	43.8	50.1	13.75	41.22	64.9	23.92	16.93	39.03	302.8	333.2	395.6	27.1	62.3	65.5	52.7
AQSLKAPSIATIK	1xPhospho [S3]	Q6R327	Rapamycin-insensitive companion of mTOR OS=Homo sapiens OX=9606 GN=RICTOR PE=1 SV=1	0.997	0.159	0.285	1.332	0.746	1.336	4.702	4.678	2.62	0	-2.66	-1.81	0.41	-0.42	0.42	2.23	2.23	1.39	0.999948	0.3832	0.946442	0.990229	0.999863	0.965814	0.507499	0.695604	0.986074	132.8	132.4	21.1	37.8	176.9	99.1	27.12	52.3	141.14	105.04	21.83	56.47	125.3	119.8	73	40.6	139	119.5	149.1
SKPDPEVGPLLGVQPLPGSPTADR	1xPhospho [S19]	Q9H5J0	Zinc finger and BTB domain-containing protein 3 OS=Homo sapiens OX=9606 GN=ZBTB3 PE=1 SV=1	0.671	0.159	1.063	0.148	1.048	0.22	6.604	0.139	0.986	-0.58	-2.66	0.09	-2.76	0.07	-2.18	2.72	-2.85	-0.02	0.988844	0.613792	0.999893	0.776317	0.972127	0.977732	0.950073	0.651455	0.919021	146.8	98.5	23.3	156	21.7	153.8	58.5	82.36	101.81	55.27	46.24	84.75	188.2	181.8	45	122	166.3	8.4	2.2
SLNPALDGLTCGLTSHDKR	1xPhospho [S1]; 1xCarbamidomethyl [C11]	O94967	WD repeat-containing protein 47 OS=Homo sapiens OX=9606 GN=WDR47 PE=1 SV=1	0.705	0.159	1	0.831	0.363	1.178	2.282	0.831	0.363	-0.5	-2.65	0	-0.27	-1.46	0.24	1.19	-0.27	-1.46	0.997545	0.0941328	0.680312	0.999975	0.630803	0.999773	0.723235	0.772541	0.999999	147.9	104.3	23.5	147.8	122.9	53.7	23.2	4.46	41.91	80.52	7.61	11.66	181.2	163.6	113	109.6	119.9	115.3	26
SSSLVDIREEETEGGSR	1xPhospho [S3]	Q96Q42	Alsin OS=Homo sapiens OX=9606 GN=ALS2 PE=1 SV=2	0.641	0.159	0.598	0.637	0.824	0.993	5.177	1.066	1.378	-0.64	-2.65	-0.74	-0.65	-0.28	-0.01	2.37	0.09	0.46	0.336035	0.0827672	0.608589	0.860427	0.911785	0.909801	0.365456	0.996049	0.987646	155.5	99.7	24.7	92.9	99.1	128.1	79.88	69.89	110.77	25.94	46.3	30.8	418.5	122.1	112.6	106.9	15.5	78.3	19.4
SSGPTSLFAVTVAPPGAR	1xPhospho [S]	Q00839	Heterogeneous nuclear ribonucleoprotein U OS=Homo sapiens OX=9606 GN=HNRNPU PE=1 SV=6	0.08	0.159	0.083	0.112	0.088	1.402	0.554	1.346	1.064	-3.65	-2.65	-3.59	-3.16	-3.5	0.49	-0.85	0.43	0.09	0.908246	0.91844	0.315197	0.504011	0.619973	0.964035	0.98757	0.998646	0.990074	394.3	31.4	62.8	32.7	44	34.8	75.5	144.52	135.95	70.6	72.22	45.88	376.4	312.8	34.1	19.5	24.9	357.6	10.8
VDGETASDSESRAESAPLPVSADDTPEVLNR	1xPhospho [S]	O95674	Phosphatidate cytidylyltransferase 2 OS=Homo sapiens OX=9606 GN=CDS2 PE=1 SV=1	1.01	0.159	1.18	1.421	0.923	1.406	5.787	1.204	0.782	0.01	-2.65	0.24	0.51	-0.12	0.49	2.53	0.27	-0.35	0.999983	0.890423	1	1	0.999996	0.999987	0.928914	1	0.999999	105.4	106.5	16.8	124.3	149.8	97.2	76.74	73.77	133.94	74.88	78.51	74.72	187.1	132.1	18	136.7	133.4	14.1	21.1
SKPGSTGPEPPIPQASPGPPGPLSQTPPMQRPVEPQEGPHK	2xDeamidated [Q14; Q25]; 1xPhospho [T26]	Q8N4C8	Misshapen-like kinase 1 OS=Homo sapiens OX=9606 GN=MINK1 PE=1 SV=2	0.247	0.16	1.186	2.209	0.526	8.944	3.295	1.862	0.443	-2.02	-2.65	0.25	1.14	-0.93	3.16	1.72	0.9	-1.17	0.555664	0.300273	0.999894	0.994046	0.965523	0.294565	0.710637	0.970903	0.99225	112.6	27.8	18	133.6	248.8	59.2	89.5	101.55	89.5	95.43	68.21	129.72	70	267.1	57.2	12.2	17.3	77.1	9.5
EDVIEKAELEEMEEVHPSDEEEEDATKAEGFYQK	1xPhospho [S18]; 1xDeamidated [Q33]	P78559	Microtubule-associated protein 1A OS=Homo sapiens OX=9606 GN=MAP1A PE=1 SV=6	0.188	0.16	0.942	0.802	0.762	4.272	4.769	0.852	0.81	-2.41	-2.64	-0.09	-0.32	-0.39	2.09	2.25	-0.23	-0.3	0.958173	0.826946	0.985591	0.803453	0.906076	0.997538	0.99995	0.987706	0.998817	155.7	29.2	24.9	146.6	124.9	118.7	25.59	110.67	128.59	85.29	88.32	85.22	222.3	139.4	154.8	21	29.1	157.6	4.6
NNLSASMFDLSMK	1xDeamidated [N]; 1xPhospho [S6]	Q9BXF6	Rab11 family-interacting protein 5 OS=Homo sapiens OX=9606 GN=RAB11FIP5 PE=1 SV=1	0.583	0.16	0.932	0.236	0.342	0.404	2.139	0.253	0.367	-0.78	-2.64	-0.1	-2.08	-1.55	-1.31	1.1	-1.98	-1.45	0.533038	0.175629	1	0.769652	0.76973	0.997858	0.799375	0.757499	0.757579	184.4	107.6	29.5	171.9	43.5	63.1	14.08	83.62	11.43	8.55	101.5	84.01	170.1	175.4	134	144.3	7.2	99.3	22.8
SQSIEQESQEK	1xPhospho [S3]	Q5VTL8	Pre-mRNA-splicing factor 38B OS=Homo sapiens OX=9606 GN=PRPF38B PE=1 SV=1	1.123	0.16	0.183	0.305	0.715	0.271	4.459	1.664	3.899	0.17	-2.64	-2.45	-1.71	-0.48	-1.88	2.16	0.73	1.96	0.999896	0.366605	0.424734	0.92111	0.999142	0.834118	0.549024	0.916332	0.616857	172.1	193.3	27.6	31.5	52.5	123	58.28	50.25	122.24	45.97	83.91	31.87	53.9	223.7	167.9	188.6	72.1	231.4	26.9
TLPMSPPSER	2xPhospho [T1; S8]	O15062	Zinc finger and BTB domain-containing protein 5 OS=Homo sapiens OX=9606 GN=ZBTB5 PE=1 SV=1	0.918	0.16	0.2	1.675	0.183	1.825	1.142	8.384	0.917	-0.12	-2.64	-2.32	0.74	-2.45	0.87	0.19	3.07	-0.13	1	0.914759	0.841101	0.999029	0.773518	0.997631	0.999341	0.958806	0.99999	145.1	133.2	23.3	29	243	26.6	70.51	28.38	147.19	133.62	83.85	17.52	42.2	127	229.1	154.4	116.6	86.9	8.9
EVQTPQYLNPFDEPEAFVTIKDSPPQSTKR	1xDeamidated [N9]; 1xPhospho [S23]	Q8NDI1	EH domain-binding protein 1 OS=Homo sapiens OX=9606 GN=EHBP1 PE=1 SV=3	0.234	0.161	2.163	0.164	1.705	0.703	10.615	0.076	0.788	-2.1	-2.64	1.11	-2.61	0.77	-0.51	3.41	-3.72	-0.34	0.994278	0.858966	0.990601	0.98686	0.99889	0.999998	0.968432	0.826927	0.926251	110.6	25.8	17.8	239.2	18.2	188.5	63.8	119.71	149.35	20.55	155.82	103.09	28.1	131.8	84.2	119.2	11.4	19.7	0.8
TELSPSFINPNPLEWFASEEPTEESEKPLTQSGGAPPPPGGK	1xPhospho [S]; 1xDeamidated [N/Q]	P46821	Microtubule-associated protein 1B OS=Homo sapiens OX=9606 GN=MAP1B PE=1 SV=2	0.276	0.161	0.292	0.277	0.202	1.005	1.258	0.95	0.694	-1.86	-2.64	-1.78	-1.85	-2.3	0.01	0.33	-0.07	-0.53	1	0.842661	0.999982	1	0.999941	1	0.919438	0.999938	1	271.8	74.9	43.7	79.2	75.3	55	79.5	109.41	34.57	120.92	133.31	150.21	135.9	174.9	11.4	213.9	32.2	37.5	11.6
VASASAGSCDVPSPFNHRPGSHLDSHR	1xCarbamidomethyl [C9]; 1xPhospho [S13]	Q16643	Drebrin OS=Homo sapiens OX=9606 GN=DBN1 PE=1 SV=4	1.297	0.161	2.254	4.31	7.485	3.323	46.464	1.912	3.32	0.38	-2.63	1.17	2.11	2.9	1.73	5.54	0.93	1.73	0.96528	0.144868	0.544885	0.0504687	0.0084256	0.178568	0.000136811	0.594191	0.146915	36.3	47.1	5.9	81.9	156.7	272.1	31.55	81.92	103.02	37.63	17.21	4.73	39.9	20.6	34.9	45.3	110.5	18.1	3.8
MAESPCSPSGQQPPSPPSPDELPANVK	1xCarbamidomethyl [C6]; 2xPhospho [S15; S]	Q14160	Protein scribble homolog OS=Homo sapiens OX=9606 GN=SCRIB PE=1 SV=5	6.15	0.161	0.486	0.923	0.896	0.15	5.557	1.897	1.842	2.62	-2.63	-1.04	-0.12	-0.16	-2.74	2.47	0.92	0.88	0.535997	0.969778	0.999813	0.987296	0.999998	0.865873	0.950688	0.998905	0.999982	62.4	383.7	10.1	30.3	57.6	55.9	140.89	19.34	122.08	135.27	104.14	118.3	1.8	289.6	40.9	192.5	251.6	285.4	6.6
ALSPGLEESGLGLLAR	1xPhospho [S3]	O15417	Trinucleotide repeat-containing gene 18 protein OS=Homo sapiens OX=9606 GN=TNRC18 PE=1 SV=3	0.864	0.162	0.963	0.214	0.844	0.248	5.211	0.223	0.876	-0.21	-2.63	-0.05	-2.22	-0.25	-2.01	2.38	-2.17	-0.19	0.994396	0.831311	0.648645	0.912671	0.983891	0.996319	0.993149	0.992644	0.943213	148.2	128.1	24	142.8	31.8	125.1	33.72	59.7	121.23	86.32	102.24	72.07	242.8	151.1	132.3	144.1	130.6	32.2	142
TVSLGAGAKDELHIVEAEAMNYEGSPIKVTLATLK	1xDeamidated [N21]; 1xPhospho [S/Y]	P06748	Nucleophosmin OS=Homo sapiens OX=9606 GN=NPM1 PE=1 SV=2	1.372	0.162	0.37	0.219	0.027	0.159	0.165	0.59	0.072	0.46	-2.63	-1.43	-2.19	-5.23	-2.65	-2.6	-0.76	-3.8	0.999724	0.339628	0.974606	0.497411	0.019066	0.653775	0.493824	0.88102	0.0647811	190.5	261.4	30.9	70.6	41.7	5.1	39.98	63.9	67.67	91.31	66.88	140.85	297.2	135.8	186.4	49.4	259.8	255.8	8.7
ALTHNGTPR	1xPhospho [T7]	Q9HB90	Ras-related GTP-binding protein C OS=Homo sapiens OX=9606 GN=RRAGC PE=1 SV=1	0.908	0.162	1.123	0.981	0.226	1.08	1.392	0.874	0.201	-0.14	-2.63	0.17	-0.03	-2.15	0.11	0.48	-0.19	-2.31	0.999849	0.00629704	0.999982	0.999987	0.020163	0.999999	0.979061	0.999537	0.0154283	136.4	123.9	22.1	153.1	133.8	30.8	25.7	5.55	85.3	8.65	9.64	53.52	111.9	184	134.6	133.1	122.2	120.2	43.4
TTSPGGRPSARSPLSPTETFSWPDVR	3xPhospho [S3; S9; S12]	A1L390	Pleckstrin homology domain-containing family G member 3 OS=Homo sapiens OX=9606 GN=PLEKHG3 PE=1 SV=1	0.155	0.162	0.135	0.111	0.216	0.716	1.334	0.826	1.609	-2.69	-2.62	-2.89	-3.17	-2.21	-0.48	0.42	-0.27	0.69	0.979949	0.562094	0.766001	0.482173	0.972969	0.853559	0.924582	0.99494	0.989881	337.1	52.4	54.7	45.4	37.5	73	80.37	118.5	38.67	50.64	23.94	131.82	25.4	258.1	365.4	287.5	36.6	40.1	41.9
SLSPQLLQQMPSKPEGAAK	1xPhospho [S3]	Q9UPX8	SH3 and multiple ankyrin repeat domains protein 2 OS=Homo sapiens OX=9606 GN=SHANK2 PE=1 SV=4	0.193	0.162	0.37	0.326	1.176	1.69	7.24	0.882	3.177	-2.37	-2.62	-1.43	-1.62	0.23	0.76	2.86	-0.18	1.67	0.803806	0.55011	0.97732	0.992526	0.995549	0.978188	0.303662	0.999983	0.828823	185.8	35.9	30.2	68.8	60.7	218.6	66	61.53	134.76	96.37	84.54	23.03	213.8	35.8	181.8	10	35.1	47.2	0.7
KKSEPDDELLFDFLNSSQK	1xPhospho [S3]	Q8TBA6	Golgin subfamily A member 5 OS=Homo sapiens OX=9606 GN=GOLGA5 PE=1 SV=3	0.028	0.163	0.136	0.036	0.097	1.261	0.597	0.262	0.715	-5.15	-2.62	-2.88	-4.81	-3.37	0.33	-0.74	-1.93	-0.48	0.0959616	0.913204	0.996932	0.363313	0.587468	0.939973	0.983575	0.606072	0.833087	411.2	11.6	66.8	55.8	14.6	39.9	79.35	123.51	15.6	118.81	95.88	34.88	426.9	403.9	24.2	1.3	50.7	11.4	65.7
GSSNVFSMFEQAQIQEFK	2xPhospho [S3; S]; 2xDeamidated [Q11; N/Q]	Q01449	Myosin regulatory light chain 2, atrial isoform OS=Homo sapiens OX=9606 GN=MYL7 PE=1 SV=1	0.64	0.163	0.962	0.033	0.285	0.051	1.755	0.034	0.297	-0.64	-2.62	-0.06	-4.94	-1.81	-4.29	0.81	-4.88	-1.75	0.997762	0.925844	0.999998	0.545971	0.980207	0.783485	0.999784	0.60486	0.990354	194.7	124.5	31.7	187.3	6.3	55.5	69.93	71.98	129.06	63.35	165.07	64.91	240.8	34.8	176.4	154.1	112.8	19.8	28.7
MEVQGEEEKREDKEDEEDEEDDDVSHVDEEDCLGVQR	2xDeamidated [Q4; Q36]; 1xPhospho [S25]; 1xCarbamidomethyl [C32]	O75381	Peroxisomal membrane protein PEX14 OS=Homo sapiens OX=9606 GN=PEX14 PE=1 SV=1	0.73	0.163	0.157	0.668	0.425	0.915	2.609	4.24	2.7	-0.45	-2.62	-2.67	-0.58	-1.23	-0.13	1.38	2.08	1.43	0.928565	0.523379	0.403483	0.992011	0.440438	0.998695	0.999985	0.713064	1	190.9	139.3	31.1	30.1	127.4	81.2	35.57	70.2	21.81	133.02	34.45	86.17	310	162.6	189.4	19.6	138.3	148.8	22.9
MRSVLISLK	1xPhospho [S3]	P09496	Clathrin light chain A OS=Homo sapiens OX=9606 GN=CLTA PE=1 SV=1	0.276	0.163	0.142	0.208	0.152	0.753	0.93	1.458	1.066	-1.86	-2.62	-2.81	-2.27	-2.72	-0.41	-0.11	0.54	0.09	0.462519	0.280099	0.157218	0.294142	0.182374	0.999028	0.999614	0.997706	0.999998	309.2	85.3	50.5	44	64.2	46.9	24.92	23.46	141.09	55.56	22.85	61.97	188.6	268.2	315.5	77.9	48.9	74	43.8
RKELEEVSPETPVVPATTQR	1xPhospho [S8]	Q15149	Plectin OS=Homo sapiens OX=9606 GN=PLEC PE=1 SV=3	0.091	0.163	1.154	1.211	0.027	13.237	0.164	1.049	0.023	-3.45	-2.61	0.21	0.28	-5.22	3.73	-2.61	0.07	-5.43	0.365081	0.822901	1	1	0.303339	0.339126	0.912311	1	0.277614	164.5	15	26.9	189.9	199.2	4.4	29.23	152.77	113.89	13.1	19.95	160.79	190.2	105.7	140.3	12.8	0.7	155.6	12.1
SGPLPSSSGSSSSSSQLSVATLGRSPSPK	2xPhospho [S25; S27]	Q86UU1	Pleckstrin homology-like domain family B member 1 OS=Homo sapiens OX=9606 GN=PHLDB1 PE=1 SV=1	0.801	0.164	0.019	0.138	0.111	0.172	0.677	7.407	5.956	-0.32	-2.61	-5.75	-2.86	-3.18	-2.54	-0.56	2.89	2.57	0.999969	0.710266	0.0547342	0.545812	0.30722	0.64705	0.968619	0.621148	0.867968	268.9	215.4	44	5	37	29.8	63.1	61.23	121.51	140.23	19.12	65.67	61.4	318.7	288.6	56.7	271.3	231.2	12.1
TPSADLFHYDSMNAVNWGMR	1xPhospho [S3]; 1xDeamidated [N13]	O94929	Actin-binding LIM protein 3 OS=Homo sapiens OX=9606 GN=ABLIM3 PE=1 SV=3	0.167	0.164	0.035	0.102	0.054	0.611	0.328	2.888	1.518	-2.58	-2.61	-4.82	-3.29	-4.22	-0.71	-1.61	1.53	0.6	0.660731	0.869358	0.368265	0.269198	0.501903	0.967237	0.979751	0.999877	0.999791	394.2	65.9	64.6	13.9	40.3	21.2	25.94	30.32	124.95	161.91	77.44	146.49	271.1	261.1	162.4	56.2	30	43.6	23.4
HFTNSVPNPRISDAELEAELEK	1xPhospho [S12]	Q8WUX9	Charged multivesicular body protein 7 OS=Homo sapiens OX=9606 GN=CHMP7 PE=1 SV=1	0.96	0.164	0.697	0.842	0.654	0.877	3.979	1.208	0.938	-0.06	-2.61	-0.52	-0.25	-0.61	-0.19	1.99	0.27	-0.09	0.999472	0.450531	0.424621	0.994523	0.93992	0.999942	0.911061	0.711758	0.893642	139	133.4	22.8	96.9	117	90.9	53.58	71.43	99.53	83.01	3.91	84.52	265.1	110.6	115.6	248.6	111	56.4	19
SEESPVYSNSSVR	1xPhospho [S4]	Q03188	Centromere protein C OS=Homo sapiens OX=9606 GN=CENPC PE=1 SV=2	1.024	0.164	0.819	0.901	0.717	0.881	4.362	1.101	0.876	0.03	-2.6	-0.29	-0.15	-0.48	-0.18	2.12	0.14	-0.19	0.989188	0.0528599	0.999933	0.999066	1	0.924645	0.052068	0.99193	0.999946	129.7	132.8	21.3	106.2	116.9	93	50.51	30.73	83.61	16.81	57.21	13.4	143	47.9	152.4	146.4	99.2	188	4.6
TRPGSFQSLSDALSDTPAK	1xPhospho [S]	Q9H9C1	Spermatogenesis-defective protein 39 homolog OS=Homo sapiens OX=9606 GN=VIPAS39 PE=1 SV=1	0.719	0.165	1.139	1.478	0.692	2.056	4.203	1.298	0.608	-0.48	-2.6	0.19	0.56	-0.53	1.04	2.07	0.38	-0.72	0.983854	0.358655	0.986463	0.942162	0.999048	0.646083	0.543664	0.999791	0.914529	115.6	83.1	19	131.6	170.8	80	63.46	73.53	113.64	11.28	11.46	70.23	29.7	155.1	123.2	106.6	88.5	11.3	20.3
LLVDSQGLSGCSPR	1xCarbamidomethyl [C11]; 1xPhospho [S12]	O94885	SAM and SH3 domain-containing protein 1 OS=Homo sapiens OX=9606 GN=SASH1 PE=1 SV=3	0.666	0.165	0.075	0.118	0.056	0.178	0.338	1.57	0.738	-0.59	-2.6	-3.73	-3.08	-4.17	-2.49	-1.56	0.65	-0.44	0.942722	0.965551	0.98562	0.999748	0.946847	0.848447	0.999999	0.998881	0.999879	288.4	192.1	47.5	21.8	34.2	16.1	86.25	24.11	74.89	52.04	76.45	143.38	309.2	352.2	2.3	148.5	206	244	50.9
NLESIDPQFTIR	1xPhospho [T10]	Q9Y2L9	Leucine-rich repeat and calponin homology domain-containing protein 1 OS=Homo sapiens OX=9606 GN=LRCH1 PE=1 SV=3	1.044	0.165	1.114	1.115	1.149	1.068	6.973	1	1.032	0.06	-2.6	0.16	0.16	0.2	0.09	2.8	0	0.05	0.991483	0.137402	0.999998	0.999999	0.999984	0.984681	0.107605	1	1	107.4	112.1	17.7	119.6	119.7	123.4	15.05	79.17	121.95	4.2	16.12	15	126.4	108	93.6	16	112.7	175.2	1.2
VEPSSQSPGRSPR	2xPhospho [S7; S11]	Q8IUD2	ELKS/Rab6-interacting/CAST family member 1 OS=Homo sapiens OX=9606 GN=ERC1 PE=1 SV=1	0.526	0.165	0.058	0.388	0.475	0.738	2.869	6.657	8.142	-0.93	-2.6	-4.1	-1.37	-1.08	-0.44	1.52	2.73	3.03	0.999999	0.966073	0.636759	0.999993	1	0.999896	0.977714	0.711023	0.678909	229.7	120.8	38	13.4	89.1	109	87.64	80.12	55.68	87.07	55.8	56.23	258.5	367.3	6.9	242.1	26.2	135.9	42.8
TELESTIFGSPR	1xPhospho [S10]	Q9UQK1	Protein phosphatase 1 regulatory subunit 3C OS=Homo sapiens OX=9606 GN=PPP1R3C PE=1 SV=2	0.413	0.166	0.562	0.411	0.171	0.996	1.036	0.732	0.305	-1.28	-2.59	-0.83	-1.28	-2.54	-0.01	0.05	-0.45	-1.71	0.903962	0.327295	0.3381	0.76416	0.311449	0.999469	1	0.963601	1	220.4	90.9	36.5	123.8	90.6	37.8	16.42	41.42	52.93	85.37	56.04	54.2	300.8	248.2	217.8	102.4	56.8	138.9	14.1
QPGSTAQYDAGAGSPEAEPTDSDSPPSSSADASR	1xPhospho [S/T]	O14976	Cyclin-G-associated kinase OS=Homo sapiens OX=9606 GN=GAK PE=1 SV=2	0.686	0.166	1.046	0.771	0.285	1.125	1.718	0.738	0.272	-0.54	-2.59	0.06	-0.37	-1.81	0.17	0.78	-0.44	-1.88	0.983031	0.694621	1	0.998473	0.526505	0.999748	0.999614	0.997164	0.496091	151.8	104.1	25.1	158.7	117.1	43.2	23.95	62.13	116.99	22.11	55.67	127.23	98.8	161.5	141.8	97.2	28.5	135	23.5
SSSPIPLTPSK	1xPhospho [S]	Q8N5Y2	MSL complex subunit 3 OS=Homo sapiens OX=9606 GN=MSL3 PE=1 SV=1	0.878	0.166	1.035	0.63	0.494	0.718	2.979	0.609	0.477	-0.19	-2.59	0.05	-0.67	-1.02	-0.48	1.57	-0.71	-1.07	0.947451	0.00212957	0.791557	0.873826	0.540636	0.413625	0.0372552	0.239083	0.0899004	142.8	125.4	23.7	147.7	90	70.5	48.37	20.56	15.07	5.49	37.4	24.27	154.4	53.9	157.8	173	115.7	135.6	25.6
RQSQLIDTLQHQVK	1xPhospho [S3]; 1xDeamidated [Q10]	Q9BZF9	Uveal autoantigen with coiled-coil domains and ankyrin repeats OS=Homo sapiens OX=9606 GN=UACA PE=1 SV=2	0.822	0.166	1.213	1.077	1.086	1.311	6.542	0.888	0.895	-0.28	-2.59	0.28	0.11	0.12	0.39	2.71	-0.17	-0.16	1	0.990649	0.997557	0.999194	0.991592	0.999076	0.853826	0.966583	0.909838	111.9	91.9	18.6	135.7	120.5	121.4	88.14	84.41	130.44	90.55	64.32	21.56	118.9	193.9	7.1	97.7	10	160	19.7
ANTIPIIGSPSSK	1xPhospho [S]	O94988	Protein FAM13A OS=Homo sapiens OX=9606 GN=FAM13A PE=1 SV=2	1.065	0.166	0.237	0.04	0.259	0.038	1.556	0.171	1.092	0.09	-2.59	-2.08	-4.63	-1.95	-4.72	0.64	-2.55	0.13	0.994655	0.295955	0.202358	0.0268191	0.272568	0.063393	1	0.809064	0.999933	216.8	231	36	51.3	8.8	56.1	6.45	59.88	34.95	53.08	141.26	65.47	214.3	243.8	232	247.2	59.5	267.3	36.2
RASNEKESAAPASPAPSPAPSPTPAPPQK	1xDeamidated [N/Q]; 2xPhospho [S8; S13]	Q3KQU3	MAP7 domain-containing protein 1 OS=Homo sapiens OX=9606 GN=MAP7D1 PE=1 SV=1	0.242	0.166	0.17	1.035	0.197	4.273	1.183	6.096	1.158	-2.05	-2.59	-2.56	0.05	-2.35	2.1	0.24	2.61	0.21	0.923746	0.916109	0.993278	0.999441	0.930735	0.985723	1	0.999908	0.998462	213.5	51.7	35.5	36.3	221	42	68.18	27.35	120.21	113.08	82.48	118.97	216.4	32.2	201.8	48.9	29.4	50.4	11.6
SADNLSCPSPLNVMEPVTELMQEQSYLK	1xCarbamidomethyl [C7]; 1xPhospho [S/T]	P28290	Protein ITPRID2 OS=Homo sapiens OX=9606 GN=ITPRID2 PE=1 SV=3	0.328	0.166	0.11	0.145	0.141	0.443	0.849	1.314	1.28	-1.61	-2.59	-3.18	-2.79	-2.82	-1.18	-0.24	0.39	0.36	0.991178	0.993337	0.68484	0.917262	0.968248	0.998237	0.999887	0.995225	0.977223	317.3	104	52.8	35	46	44.8	84.82	105.96	31.66	90.92	84.44	27.5	429.4	10.8	338.8	111	293.2	6.5	48.7
GPAPAPQQCSEPETK	1xCarbamidomethyl [C9]; 1xPhospho [S10]	Q3YEC7	Rab-like protein 6 OS=Homo sapiens OX=9606 GN=RABL6 PE=1 SV=2	0.839	0.166	0.074	0.035	0.171	0.042	1.028	0.475	2.299	-0.25	-2.59	-3.75	-4.82	-2.55	-4.57	0.04	-1.07	1.2	0.975615	0.788761	0.29888	0.310326	0.646338	0.6896	0.99979	1	0.981925	262.4	220.2	43.7	19.5	9.3	44.9	72.76	83.32	20.27	77.57	116.82	62.48	44.3	314.6	389.2	8.5	300.5	264	61.5
ESPRPLQLPGAEGPAISDGEEGGGEPGAGGGAAGAAGAGR	1xDeamidated [Q7]; 1xPhospho [S]	Q6PKG0	La-related protein 1 OS=Homo sapiens OX=9606 GN=LARP1 PE=1 SV=2	0.705	0.167	0.611	14.065	0.349	19.953	2.093	23.016	0.571	-0.5	-2.58	-0.71	3.81	-1.52	4.32	1.07	4.52	-0.81	0.965314	0.584391	0.994743	0.988436	0.993157	0.732234	0.868138	0.865297	1	35.5	25	5.9	21.7	499.4	12.4	145.2	26.35	91.57	160.9	86.75	167.15	16.5	295.2	19.2	13.5	11.4	18.9	1.8
RERPTSPAPHRPPK	1xPhospho [S6]	Q8N6T7	NAD-dependent protein deacylase sirtuin-6 OS=Homo sapiens OX=9606 GN=SIRT6 PE=1 SV=2	0.793	0.167	0.943	1.218	1.157	1.536	6.926	1.291	1.226	-0.33	-2.58	-0.08	0.28	0.21	0.62	2.79	0.37	0.29	0.713851	0.306072	0.999926	0.999932	1	0.595905	0.298064	0.997936	0.999885	113.7	90.1	19	107.2	138.4	131.5	31.58	80.54	121.86	11.25	16.78	12.05	106.3	91.3	163.4	84.3	10.1	128.6	17.8
QKSPLFQFAEISSSTSHSDASTK	1xPhospho [S3]	Q8WY36	HMG box transcription factor BBX OS=Homo sapiens OX=9606 GN=BBX PE=1 SV=1	0.191	0.167	0.192	0.109	0.162	0.569	0.968	0.566	0.841	-2.39	-2.58	-2.38	-3.2	-2.63	-0.81	-0.05	-0.82	-0.25	0.959342	0.944285	0.930756	0.301585	0.899603	0.730028	0.999987	0.791576	0.999998	329.4	63	55.1	63.4	35.8	53.3	89.26	92.84	121.79	113.72	41.4	118.99	410.6	204.8	28.1	39.1	39.2	174.8	246.2
DDDDIDLFGSDDEEESEEAK	1xPhospho [S10]	P24534	Elongation factor 1-beta OS=Homo sapiens OX=9606 GN=EEF1B2 PE=1 SV=3	1.158	0.167	0.058	0.071	0.673	0.062	4.019	1.225	11.551	0.21	-2.58	-4.1	-3.81	-0.57	-4.02	2.01	0.29	3.53	1	0.759685	0.432995	0.345852	0.9879	0.351475	0.974789	0.999966	0.77349	191.8	222.1	32.1	11.2	13.7	129.1	45.59	25.12	104.04	154.92	155.24	67.28	102.3	162.5	260.4	188.2	116.7	188.3	11.3
GGSDTNLNFDVPDGILDFHK	1xPhospho [S/T]; 1xDeamidated [N8]	Q9ULS5	Transmembrane and coiled-coil domain protein 3 OS=Homo sapiens OX=9606 GN=TMCC3 PE=1 SV=3	0.283	0.168	0.398	0.36	0.085	1.276	0.505	0.904	0.213	-1.82	-2.58	-1.33	-1.47	-3.56	0.35	-0.99	-0.14	-2.23	0.906292	0.908885	0.999632	0.865249	0.626099	0.999997	0.990794	0.956947	0.786978	261.6	73.9	43.9	104.2	94.3	22.2	61.14	63.25	109.21	90.78	132.1	82.94	49.9	234.8	222.3	13.7	62.8	71.6	37.3
ASLGSLEGEAEAEASSPKGK	2xPhospho [S5; S15]	Q09666	Neuroblast differentiation-associated protein AHNAK OS=Homo sapiens OX=9606 GN=AHNAK PE=1 SV=2	0.261	0.168	0.237	0.117	0.166	0.447	0.986	0.492	0.698	-1.94	-2.57	-2.08	-3.1	-2.59	-1.16	-0.02	-1.02	-0.52	0.992898	0.908846	0.973639	0.842434	0.656601	0.986787	0.994078	0.997451	0.96374	308	80.3	51.7	73	35.9	51	73.9	88.09	103.98	82.86	146.53	62.62	296.3	34	214.7	44	56	204.5	36.1
DLFAFQESPPR	1xPhospho [S8]	P51957	Serine/threonine-protein kinase Nek4 OS=Homo sapiens OX=9606 GN=NEK4 PE=1 SV=2	0.555	0.168	0.239	0.428	0.411	0.771	2.445	1.785	1.715	-0.85	-2.57	-2.06	-1.23	-1.28	-0.38	1.29	0.84	0.78	0.99997	0.427686	0.313131	0.981098	0.5119	0.995034	0.999983	0.669915	0.998291	214.3	118.9	36	51.3	91.6	88	65.17	62.98	77.6	46.47	85.64	75.31	290.9	171.3	62.9	255	92.8	95	28.8
RVSHQGYSTEAEFEEPR	1xPhospho [S/T/Y]	P30533	Alpha-2-macroglobulin receptor-associated protein OS=Homo sapiens OX=9606 GN=LRPAP1 PE=1 SV=1	0.738	0.168	0.109	0.93	0.872	1.261	5.185	8.569	8.037	-0.44	-2.57	-3.2	-0.1	-0.2	0.33	2.37	3.1	3.01	0.995979	0.491361	0.117497	0.999128	1	0.999992	0.529731	0.201529	0.131135	157.2	115.9	26.4	17.1	146.2	137.1	25.37	63.12	117.95	87.75	63.18	36.97	110.9	177.5	181.9	30.8	159.4	130.9	1.7
TSPGTSSAYTSDSPGSYHNEEDEEEDGGEEGMDEQYR	1xPhospho [S/T/Y]	Q96RE7	Nucleus accumbens-associated protein 1 OS=Homo sapiens OX=9606 GN=NACC1 PE=1 SV=1	0.379	0.168	0.813	3.218	3.088	8.495	18.341	3.96	3.8	-1.4	-2.57	-0.3	1.69	1.63	3.09	4.2	1.99	1.93	0.931529	0.857068	0.975172	0.379	0.436222	0.0963108	0.0826349	0.774281	0.830587	69.2	26.2	11.7	56.3	222.8	213.8	113.43	96.44	79.11	96.71	53.63	41.1	49.8	161.9	3.6	44.9	18.9	2.6	5.9
VANSPTMVNLLLGK	1xPhospho [S4]	Q6UB99	Ankyrin repeat domain-containing protein 11 OS=Homo sapiens OX=9606 GN=ANKRD11 PE=1 SV=3	0.525	0.168	1.058	1.251	0.784	2.381	4.655	1.182	0.741	-0.93	-2.57	0.08	0.32	-0.35	1.25	2.22	0.24	-0.43	0.612831	0.032037	0.877496	0.99993	0.884648	0.730546	0.182756	0.944617	1	125.3	65.8	21.1	132.6	156.8	98.3	93.83	67.9	24.13	56.56	23.51	44.55	395.7	116.2	61.4	61	128	30.8	19.6
SASPEVSEGHENQHGQESEAK	1xPhospho [S]	O60930	Ribonuclease H1 OS=Homo sapiens OX=9606 GN=RNASEH1 PE=1 SV=2	0.846	0.168	0.28	0.779	0.794	0.92	4.712	2.785	2.838	-0.24	-2.57	-1.84	-0.36	-0.33	-0.12	2.24	1.48	1.5	0.8865	0.159244	0.218652	0.997109	0.9779	0.987732	0.424916	0.402419	0.538615	155.2	131.3	26.1	43.4	120.9	123.2	6.99	60.33	102.13	74.94	18.62	40.77	162.9	144.9	165	32	145.1	137.8	109.6
DSGSDQDLDGAGVRASDLEDEESAAR	1xDeamidated [Q6]; 1xPhospho [S16]	Q86VM9	Zinc finger CCCH domain-containing protein 18 OS=Homo sapiens OX=9606 GN=ZC3H18 PE=1 SV=2	1.024	0.168	0.795	1.062	0.114	1.037	0.677	1.335	0.143	0.03	-2.57	-0.33	0.09	-3.13	0.05	-0.56	0.42	-2.8	0.999897	0.947476	0.978377	1	0.380435	0.999759	0.845291	0.972222	0.763855	144.1	147.6	24.3	114.6	153	16.4	58.09	72.57	113.48	85.97	57.48	72.97	43.5	167.3	181.8	190.4	21.3	171.3	22.9
LTEELQTVENGYHDNPTLEVMETSSEMQEK	2xDeamidated [N15; N/Q]; 1xPhospho [S/T]	O00592	Podocalyxin OS=Homo sapiens OX=9606 GN=PODXL PE=1 SV=2	1.073	0.169	0.111	1.858	0.187	1.732	1.108	16.69	1.679	0.1	-2.57	-3.17	0.89	-2.42	0.79	0.15	4.06	0.75	0.950508	0.984822	0.635997	0.692417	0.962995	0.988404	0.999986	0.0872924	0.968444	136.4	146.3	23	15.2	253.5	25.5	74.32	14.35	99.14	143.9	10.91	90.56	137.8	124	13.4	120.2	133	158.9	20.9
HIDSSPYSPAYLSPPPESSWR	1xPhospho [S/Y]	Q53ET0	CREB-regulated transcription coactivator 2 OS=Homo sapiens OX=9606 GN=CRTC2 PE=1 SV=2	0.225	0.169	1.278	1.1	1.374	4.899	8.115	0.861	1.075	-2.15	-2.56	0.35	0.14	0.46	2.29	3.02	-0.22	0.1	0.362207	0.0842816	0.964353	0.994405	0.927585	0.174133	0.01737	0.999743	0.999984	116.6	26.2	19.7	149	128.3	160.2	30.73	95.92	100.32	6.21	17.74	4.92	127.8	107.2	67	103.8	24.1	19.9	9.8
KNTFTAWSDEESDYEIDDRDVNK	2xPhospho [S/T]; 1xDeamidated [N]	Q6PKG0	La-related protein 1 OS=Homo sapiens OX=9606 GN=LARP1 PE=1 SV=2	1.022	0.17	1.316	1.163	1.016	1.137	5.994	0.884	0.772	0.03	-2.56	0.4	0.22	0.02	0.19	2.58	-0.18	-0.37	0.987203	0.787434	0.991834	0.998483	1	0.905052	0.801449	0.999974	0.989828	105.5	107.9	17.9	138.8	122.7	107.2	72.32	93.87	143.05	10.57	23.8	62.91	156	20.9	106.8	109.2	1.4	186.7	0.8
KDLGSTEDGDGTDDFLTDKEDEK	2xPhospho [T12; T17]	Q15527	Surfeit locus protein 2 OS=Homo sapiens OX=9606 GN=SURF2 PE=1 SV=4	1.433	0.17	1.584	0.58	0.121	0.405	0.713	0.366	0.076	0.52	-2.56	0.66	-0.78	-3.05	-1.3	-0.49	-1.45	-3.71	0.999963	0.514231	0.992648	0.96765	0.396955	0.924386	0.999903	0.770144	0.185243	122.7	175.9	20.8	194.4	71.3	14.8	83.85	16.82	112.51	32.47	82.12	147.34	52.7	87.7	263.3	102.9	144.7	125.7	92.8
LCDFGVSGQLIDSMANSFVGTR	1xCarbamidomethyl [C2]; 1xPhospho [S]	P36507; Q02750	Dual specificity mitogen-activated protein kinase kinase 2 OS=Homo sapiens OX=9606 GN=MAP2K2 PE=1 SV=1 Dual specificity mitogen-activated protein kinase kinase 1 OS=Homo sapiens OX=9606 GN=MAP2K1 PE=1 SV=2	1.584	0.17	1.884	5.046	4.759	3.186	28.023	2.678	2.525	0.66	-2.56	0.91	2.34	2.25	1.67	4.81	1.42	1.34	0.999992	0.453591	0.893898	0.155399	0.172091	0.125798	0.00757749	0.603705	0.641848	41.5	65.8	7.1	78.3	209.6	197.7	38.41	72.72	125.26	9.8	8.66	4.09	63.8	29.9	41.3	65.5	88.5	10.8	7
KGSLSSVTPSPTPENEK	1xPhospho [S3]	Q92870	Amyloid beta precursor protein binding family B member 2 OS=Homo sapiens OX=9606 GN=APBB2 PE=1 SV=3	0.591	0.17	1.632	1.371	1.38	2.319	8.124	0.84	0.845	-0.76	-2.56	0.71	0.46	0.46	1.21	3.02	-0.25	-0.24	0.999949	0.0908152	0.931138	0.744479	0.98083	0.634882	0.0291639	0.997422	0.999832	97.6	57.8	16.6	159.4	133.9	134.7	50.15	66.89	64.24	61.62	30.84	57.58	97.3	113.3	35.4	57.5	37	133.6	16.5
SSPHSTYYMGQSSSGGSIHSNLEQEK	1xPhospho [S]	Q9ULH0	Kinase D-interacting substrate of 220 kDa OS=Homo sapiens OX=9606 GN=KIDINS220 PE=1 SV=3	0.19	0.17	0.202	0.875	0.23	4.592	1.354	4.332	1.14	-2.39	-2.56	-2.31	-0.19	-2.12	2.2	0.44	2.12	0.19	0.862653	0.653853	0.968285	0.992661	0.733155	0.990943	0.99999	0.999913	0.98711	225	42.8	38.2	45.4	196.7	51.8	95.44	120.12	46.16	107.52	93.75	40.96	177.5	428.1	28.8	181	13.5	33.8	17.8
RGHVTPNLSR	1xPhospho [T5]	Q96CP6	Protein Aster-A OS=Homo sapiens OX=9606 GN=GRAMD1A PE=1 SV=2	0.673	0.17	0.467	0.857	0.538	1.273	3.161	1.837	1.153	-0.57	-2.55	-1.1	-0.22	-0.89	0.35	1.66	0.88	0.21	0.999002	0.489879	0.999344	0.884455	0.99817	0.976988	0.294213	0.727914	0.973231	161.9	109	27.6	75.6	138.8	87.1	72.64	1.99	80.62	52.27	39.04	64.56	20.4	148.1	179.5	98.1	102	99.7	69.3
LSNPQIEWQNSTIDSEDGEQFDNMTDGVAEPMHGSLAGVK	1xPhospho [S/T]	Q9H2P0	Activity-dependent neuroprotector homeobox protein OS=Homo sapiens OX=9606 GN=ADNP PE=1 SV=1	0.84	0.17	0.805	0.579	1.666	0.689	9.778	0.719	2.07	-0.25	-2.55	-0.31	-0.79	0.74	-0.54	3.29	-0.48	1.05	0.919192	0.557249	0.999981	0.980223	0.999024	0.99968	0.368955	0.993935	0.994433	118.6	99.6	20.2	95.4	68.6	197.6	37.8	82	149.08	8.35	78.69	39.67	162.4	112	74.7	121.6	5.8	94	1.8
RQSLELQKCEEILHK	1xPhospho [S3]; 1xCarbamidomethyl [C9]	Q9UIG0	Tyrosine-protein kinase BAZ1B OS=Homo sapiens OX=9606 GN=BAZ1B PE=1 SV=2	0.259	0.171	0.839	0.284	0.181	1.098	1.063	0.339	0.216	-1.95	-2.55	-0.25	-1.82	-2.46	0.13	0.09	-1.56	-2.21	0.480621	0.288428	1	0.706949	0.493074	0.998322	0.997697	0.720882	0.506917	219.6	56.8	37.4	184.1	62.3	39.8	17.33	69.6	77.22	29.72	70.76	122.23	170.3	125.6	174.7	44.1	112.9	31.6	29
TINNQHSVESQDNDQPDYDSVASDEDTDLETTASK	1xDeamidated [N/Q]; 1xPhospho [S23]	Q14161	ARF GTPase-activating protein GIT2 OS=Homo sapiens OX=9606 GN=GIT2 PE=1 SV=2	0.16	0.171	1.78	1.185	1.102	7.426	6.459	0.666	0.619	-2.65	-2.55	0.83	0.25	0.14	2.89	2.69	-0.59	-0.69	0.942918	0.906373	1	0.999994	0.999987	0.904774	0.848626	0.999959	0.999932	111.1	17.7	19	197.9	131.7	122.5	62.48	128.64	102.7	82.12	63.27	61.75	146.4	129.6	29	20.7	156.4	11.9	12.9
SESPPAELPSLRR	1xPhospho [S3]	Q14669	E3 ubiquitin-protein ligase TRIP12 OS=Homo sapiens OX=9606 GN=TRIP12 PE=1 SV=1	0.043	0.171	0.682	0.157	1.163	3.625	6.812	0.23	1.704	-4.53	-2.55	-0.55	-2.67	0.22	1.86	2.77	-2.12	0.77	0.0624865	0.769858	0.999771	0.498992	0.997861	0.713889	0.533348	0.649448	0.980243	186.6	8.1	31.8	127.3	29.2	217	70.6	109.25	125.24	55.55	31.98	48.13	262.5	35.2	204.1	2.1	8.8	31.7	34.8
KEKPELSEPSHLNGPSSDPEAAFLSR	1xPhospho [S]	Q9H4A3	Serine/threonine-protein kinase WNK1 OS=Homo sapiens OX=9606 GN=WNK1 PE=1 SV=2	0.92	0.171	0.266	0.25	0.827	0.272	4.838	0.94	3.108	-0.12	-2.55	-1.91	-2	-0.27	-1.88	2.27	-0.09	1.64	0.999989	0.812015	0.998218	0.666768	0.999486	0.584714	0.643225	0.871471	0.975967	174.8	160.7	29.9	46.5	43.7	144.5	69.09	52.42	71.89	84.24	127.32	31.31	27	181.9	189.8	167.3	183.9	53.9	40.7
RIGDLQAAIEDEMESDENEDLINSLQDMVTK	1xPhospho [S15]; 1xDeamidated [N18]	Q92614	Unconventional myosin-XVIIIa OS=Homo sapiens OX=9606 GN=MYO18A PE=1 SV=3	0.786	0.171	0.814	0.081	0.919	0.103	5.372	0.1	1.129	-0.35	-2.55	-0.3	-3.63	-0.12	-3.28	2.43	-3.33	0.18	0.972283	0.64443	0.999992	0.54489	0.937555	0.91655	0.985388	0.622001	0.967381	159.1	125	27.2	129.5	12.9	146.2	13.69	75.24	123.91	28.15	157.84	86.65	139.2	177.5	143.4	136.8	112.7	12.7	112
SLPTTVPESPNYR	2xPhospho [S1; S9]	Q6PKG0	La-related protein 1 OS=Homo sapiens OX=9606 GN=LARP1 PE=1 SV=2	0.745	0.171	0.9	0.566	0.146	0.761	0.855	0.629	0.163	-0.43	-2.55	-0.15	-0.82	-2.77	-0.39	-0.23	-0.67	-2.62	0.0763049	4.64387e-08	0.863281	0.00329922	8.17178e-09	0.455088	0.177562	0.0212662	1.65718e-08	170	126.6	29.1	153.1	96.3	24.9	1.59	16.2	28.02	7.77	3.02	5.67	172.6	172	167.6	128.1	100.1	138.3	26.5
TRPGSFQSLSDALSDTPAK	1xPhospho [S5]; 1xDeamidated [Q7]	Q9H9C1	Spermatogenesis-defective protein 39 homolog OS=Homo sapiens OX=9606 GN=VIPAS39 PE=1 SV=1	0.448	0.171	1.227	0.516	0.591	1.153	3.448	0.421	0.482	-1.16	-2.54	0.29	-0.95	-0.76	0.2	1.79	-1.25	-1.05	0.999998	0.57412	0.995021	0.999978	1	1	0.577197	0.99924	0.995262	151.8	68	26	186.1	78.4	89.7	63.58	71.3	33.73	82.57	86.2	72.33	32.9	152	175	68.1	186.2	52.8	26.1
VRVSPQDANPLMANGTLTR	1xPhospho [S4]; 1xDeamidated [N14]	O60716	Catenin delta-1 OS=Homo sapiens OX=9606 GN=CTNND1 PE=1 SV=1	0.118	0.172	0.257	0.195	0.3	1.654	1.745	0.757	1.168	-3.09	-2.54	-1.96	-2.36	-1.74	0.73	0.8	-0.4	0.22	0.00630072	0.0265529	0.106348	0.132181	0.194372	0.484975	0.819179	0.999991	0.998569	293.9	34.6	50.6	75.5	57.2	88.3	20.28	74.17	27.5	27.93	65.57	67.27	287.3	285.4	196.3	33.6	14.4	73.2	63.1
HIEPELAGRDSPIRAEMPGNLQHYGR	1xPhospho [S11]	P86790	Vacuolar fusion protein CCZ1 homolog B OS=Homo sapiens OX=9606 GN=CCZ1B PE=1 SV=1	0.162	0.172	0.331	1.355	0.107	8.344	0.62	4.1	0.324	-2.62	-2.54	-1.6	0.44	-3.22	3.06	-0.69	2.04	-1.63	0.852391	0.618943	0.505434	0.999999	0.320078	0.884992	0.991044	0.550211	0.99879	191.9	31.2	33.1	63.4	260	20.5	20.54	129.81	120.34	110.43	79.26	77.46	149.2	210.1	150.2	214.1	24.4	18.6	25.9
VASGSDLHLTDIDSDSNR	1xPhospho [S/T]	Q92614	Unconventional myosin-XVIIIa OS=Homo sapiens OX=9606 GN=MYO18A PE=1 SV=3	0.749	0.173	0.632	0.837	0.583	1.117	3.38	1.324	0.922	-0.42	-2.54	-0.66	-0.26	-0.78	0.16	1.76	0.4	-0.12	0.99996	0.364777	0.999992	0.998804	0.728248	0.999959	0.982486	0.994929	0.798333	150.9	113.1	26	95.5	126.4	88	58.15	8.51	62.69	17.02	11.21	76.96	155.9	186.2	44.1	112.5	116.9	132	26.9
TSNTLEKDLDLLASVPSPSSSGSR	1xPhospho [S17]	Q8WU79	Stromal membrane-associated protein 2 OS=Homo sapiens OX=9606 GN=SMAP2 PE=1 SV=1	0.649	0.173	0.305	0.156	0.123	0.241	0.712	0.512	0.404	-0.62	-2.53	-1.71	-2.68	-3.02	-2.06	-0.49	-0.96	-1.31	0.999825	0.901906	0.998732	0.764639	0.519328	0.880767	0.972007	0.924443	0.733166	249.3	161.9	43.1	76	38.9	30.7	97.15	77.83	112.26	58.96	46.92	45.42	462.7	15.8	213	138.3	25.9	230.1	36.9
GEAEQSEEEADEEDKAEDAR	1xPhospho [S6]	P46821	Microtubule-associated protein 1B OS=Homo sapiens OX=9606 GN=MAP1B PE=1 SV=2	0.748	0.173	0.506	0.919	0.52	1.228	3.003	1.815	1.027	-0.42	-2.53	-0.98	-0.12	-0.94	0.3	1.59	0.86	0.04	0.997883	0.197516	0.875829	0.999994	0.289616	0.999633	0.999767	0.921194	0.852982	155.2	116.1	26.9	78.6	142.6	80.7	12.84	14.98	94.35	22.98	21.7	69.88	121	154.2	150.6	135.3	112.7	101.1	25.4
EERSPQTLAPVGEDAMKTPSPAAEDAREPEAK	1xDeamidated [Q6]; 3xPhospho [T7; T18; S20]	Q92797	Symplekin OS=Homo sapiens OX=9606 GN=SYMPK PE=1 SV=2	0.121	0.173	0.317	0.707	0.926	5.857	5.338	2.229	2.918	-3.05	-2.53	-1.66	-0.5	-0.11	2.55	2.42	1.16	1.55	0.283971	0.956845	0.982737	0.977597	1	0.644641	0.951025	1	0.979567	184.9	22.3	32.1	58.7	130.8	171.2	74.51	60.91	115.32	88.51	71.79	57.24	32.3	270.3	181.8	35.3	22	8.6	31
KAYSFCGTVEYMAPEVVNR	1xPhospho [S/Y]; 1xCarbamidomethyl [C6]	Q9UK32; P51812; Q15418	Ribosomal protein S6 kinase alpha-6 OS=Homo sapiens OX=9606 GN=RPS6KA6 PE=1 SV=1 Ribosomal protein S6 kinase alpha-3 OS=Homo sapiens OX=9606 GN=RPS6KA3 PE=1 SV=1 Ribosomal protein S6 kinase alpha-1 OS=Homo sapiens OX=9606 GN=RPS6KA1 PE=1 SV=2	0.143	0.174	0.192	0.231	0.803	1.617	4.624	1.2	4.177	-2.81	-2.53	-2.38	-2.12	-0.32	0.69	2.21	0.26	2.06	0.996226	0.997485	0.573945	0.998252	0.998026	1	1	0.79737	0.802553	236	33.7	41	45.4	54.4	189.5	95.75	120.48	117.15	86.25	117.04	87.8	387	187.3	12.6	191.3	22	26.7	32.5
HPASLTSSGSSGSPSSSIK	1xPhospho [S]	Q9C0D5	Protein TANC1 OS=Homo sapiens OX=9606 GN=TANC1 PE=1 SV=3	1.107	0.174	0.861	0.973	0.177	0.879	1.016	1.131	0.205	0.15	-2.52	-0.22	-0.04	-2.5	-0.19	0.02	0.18	-2.29	1	0.0881042	0.999769	0.999991	0.123341	0.999999	0.999929	0.999994	0.18617	139.8	154.8	24.3	120.3	136.1	24.7	28.76	11.73	130.61	14.54	4.06	16.57	130.3	111.3	190.7	144.3	147.9	118.4	2.6
METEADAPSPAPSLGER	1xPhospho [S9]	Q12873	Chromodomain-helicase-DNA-binding protein 3 OS=Homo sapiens OX=9606 GN=CHD3 PE=1 SV=3	1.336	0.174	2.198	2.333	0.205	1.747	1.178	1.062	0.093	0.42	-2.52	1.14	1.22	-2.29	0.8	0.24	0.09	-3.42	0.994434	0.857224	0.999976	0.977937	0.990976	0.819499	0.991817	0.946745	0.998167	82.8	110.6	14.4	182	193.2	17	82.91	84.66	147.8	83.81	9.27	135.98	21.2	173.8	82.9	2.2	110.7	125.4	1
ESSNSVSNHQLSGFDQAR	1xPhospho [S]	Q9Y450	HBS1-like protein OS=Homo sapiens OX=9606 GN=HBS1L PE=1 SV=1	0.428	0.174	0.744	0.349	0.201	0.815	1.154	0.469	0.27	-1.22	-2.52	-0.43	-1.52	-2.31	-0.29	0.21	-1.09	-1.89	0.849198	0.289499	0.996869	0.268067	0.14669	0.856494	0.996742	0.480139	0.287953	207.1	88.6	36.1	154.1	72.3	41.7	11.29	31.69	54.86	17.9	88.58	77.83	225.5	261.4	210.4	96.5	52.4	99	39.3
VFLQDGPARPASPEAGNTLR	1xPhospho [S12]	Q9UJX6	Anaphase-promoting complex subunit 2 OS=Homo sapiens OX=9606 GN=ANAPC2 PE=1 SV=1	1.221	0.175	1.13	0.8	0.979	0.655	5.594	0.707	0.866	0.29	-2.51	0.18	-0.32	-0.03	-0.61	2.48	-0.5	-0.21	0.850949	0.999897	0.998316	0.998917	0.864859	0.964761	0.757438	1	0.975909	113.1	138.1	19.8	127.8	90.4	110.7	78.39	18.42	119.68	70.66	77.99	20.12	125	8	117.8	143.8	104.3	148.8	158.2
EPVVTPQDLEGPGRAESKESVGSR	2xPhospho [S17; S20]	Q66K74	Microtubule-associated protein 1S OS=Homo sapiens OX=9606 GN=MAP1S PE=1 SV=2	1.052	0.175	1.224	1.601	1.247	1.523	7.11	1.308	1.018	0.07	-2.51	0.29	0.68	0.32	0.61	2.83	0.39	0.03	1	0.973098	0.999546	0.882971	0.925916	0.851529	0.56511	0.967958	0.985101	95.3	100.2	16.7	116.6	152.5	118.7	83.52	87.56	139.9	79.79	7.69	40.89	94.5	133.7	6.3	149.1	4.1	99.3	16.6
AQQNTDKDAAAHLQTSHKPSAEDAEGQSPLSQKYSPSTEK	1xPhospho [S/T/Y]	Q96F24	Nuclear receptor-binding factor 2 OS=Homo sapiens OX=9606 GN=NRBF2 PE=1 SV=1	0.149	0.175	0.179	1.625	1.984	10.923	11.313	9.084	11.092	-2.75	-2.51	-2.48	0.7	0.99	3.45	3.5	3.18	3.47	0.818292	0.917734	0.983177	0.936523	0.97662	0.333659	0.563559	0.630242	0.741058	117.4	17.5	20.6	21	190.7	232.9	90.2	26.49	26.18	149.09	52.84	73.61	7.1	125.4	216	19	18.7	11.4	26.3
VETPSHPGGVSEEFWER	1xPhospho [T3]	Q92620	Pre-mRNA-splicing factor ATP-dependent RNA helicase PRP16 OS=Homo sapiens OX=9606 GN=DHX38 PE=1 SV=2	0.295	0.176	0.145	0.279	0.06	0.944	0.343	1.925	0.416	-1.76	-2.51	-2.79	-1.84	-4.05	-0.08	-1.54	0.94	-1.26	0.937239	0.936245	0.858774	0.465977	0.452771	0.923501	0.916917	0.974121	0.970196	306.8	90.6	53.9	44.5	85.6	18.5	51.94	39.78	122.73	120.48	85.28	114.91	262.8	79.9	255.5	46.8	75.5	107.7	44.9
WLSTSIPEAQWHSSLAR	1xPhospho [S]	P49327	Fatty acid synthase OS=Homo sapiens OX=9606 GN=FASN PE=1 SV=3	0.724	0.176	0.883	1.482	0.507	2.046	2.882	1.679	0.574	-0.47	-2.51	-0.18	0.57	-0.98	1.03	1.53	0.75	-0.8	0.999874	0.989689	0.999043	0.883094	0.999635	0.95419	0.943596	0.711164	0.98465	125.7	91.1	22.1	111	186.4	63.7	73.44	44.96	126.22	91.62	93.5	71.65	111.9	108.6	11.8	78.6	37.5	102.1	19.1
KGSDDDGGDSPVQDIDTPEVDLYQLQVNTLR	2xPhospho [S3; S10]; 2xDeamidated [Q13; Q24]	O75446	Histone deacetylase complex subunit SAP30 OS=Homo sapiens OX=9606 GN=SAP30 PE=1 SV=1	0.896	0.176	0.893	1.071	0.903	1.195	5.13	1.2	1.012	-0.16	-2.51	-0.16	0.1	-0.15	0.26	2.36	0.26	0.02	0.999556	0.36016	0.80338	0.977892	0.999496	0.998314	0.520874	0.992609	0.927545	121.5	108.9	21.4	108.4	130.1	109.7	28.2	4.55	122.89	77.03	68.82	12.73	184.5	123.4	111	110.6	112.3	103	125.5
GLSPEGLPGRSSPPEQIFHLVPSPEELANSLQHLEHEPVNR	1xPhospho [S]; 2xDeamidated [Q16; Q32]	Q9UQQ2	SH2B adapter protein 3 OS=Homo sapiens OX=9606 GN=SH2B3 PE=1 SV=2	1.531	0.176	0.884	1.376	0.342	0.899	1.943	1.557	0.388	0.61	-2.5	-0.18	0.46	-1.55	-0.15	0.96	0.64	-1.37	0.862026	0.902944	1	0.81348	0.999542	0.999997	0.976593	0.801364	0.999697	113	173	19.9	99.9	155.5	38.7	65.3	26.18	126.11	70.28	22.32	76.44	21.2	122.3	111.4	103.6	171.6	170.4	19.6
MDSNIQGIENPGFEASPPAQGIPEAK	1xPhospho [S3]; 1xDeamidated [N10]	Q9H7M9	V-type immunoglobulin domain-containing suppressor of T-cell activation OS=Homo sapiens OX=9606 GN=VSIR PE=1 SV=3	0.142	0.177	0.215	1.043	1.038	7.329	5.875	4.841	4.818	-2.81	-2.5	-2.21	0.06	0.05	2.87	2.55	2.28	2.27	0.993984	0.971726	0.885515	0.999995	0.99764	0.984454	0.840104	0.833529	0.673003	166	23.6	29.3	35.8	173.1	172.2	78.99	128.02	25.57	123.41	75.81	67.3	192.7	185.9	11.5	12.1	26.4	181.2	21.5
AVPIGTPPK	1xPhospho [T6]	Q86TB9	Protein PAT1 homolog 1 OS=Homo sapiens OX=9606 GN=PATL1 PE=1 SV=2	0.998	0.178	1.054	0.895	0.374	0.897	2.106	0.849	0.355	0	-2.49	0.08	-0.16	-1.42	-0.16	1.07	-0.24	-1.49	0.999472	5.69152e-05	1	0.958661	0.00186965	0.995088	0.216658	0.954883	0.00181794	133.4	133.1	23.7	140.6	119.3	49.9	22.7	8.26	49.64	20.42	10.24	18.26	110	172.4	133.9	135.3	116.2	133.6	23.8
SMSQVDVDSGIENMEVDENDRR	1xDeamidated [Q4]; 1xPhospho [S9]	O95155	Ubiquitin conjugation factor E4 B OS=Homo sapiens OX=9606 GN=UBE4B PE=1 SV=1	0.204	0.178	0.339	0.123	0.089	0.604	0.501	0.363	0.262	-2.29	-2.49	-1.56	-3.02	-3.49	-0.73	-1	-1.46	-1.93	0.999963	1	0.968294	0.956427	0.996428	0.905666	0.998387	0.616845	0.811957	310.3	63.3	55.2	105.3	38.2	27.6	87.49	125.5	68.26	87.41	87.05	22.24	328.9	266	1.3	297.5	14.5	54.3	90.4
YATPQVIQAPGPR	1xPhospho [Y1]	Q07912	Activated CDC42 kinase 1 OS=Homo sapiens OX=9606 GN=TNK2 PE=1 SV=3	0.128	0.178	0.969	0.576	0.415	4.502	2.333	0.595	0.428	-2.97	-2.49	-0.05	-0.79	-1.27	2.17	1.22	-0.75	-1.22	0.582355	0.528274	1	0.74179	0.292209	0.99969	0.995977	0.708002	0.268239	183.7	23.5	32.7	178	105.9	76.2	23.77	104.31	18.98	9.22	74.36	83.95	188.9	225.8	138.5	24.2	20.2	122.8	33.6
HSTSGTDEGEDGDEPDDGSNDVVDLLPR	1xPhospho [S/T]; 1xDeamidated [N20]	Q14008	Cytoskeleton-associated protein 5 OS=Homo sapiens OX=9606 GN=CKAP5 PE=1 SV=3	0.92	0.178	0.203	0.837	0.681	0.909	3.824	4.127	3.358	-0.12	-2.49	-2.3	-0.26	-0.55	-0.14	1.93	2.05	1.75	0.993073	0.898202	0.770389	0.999835	0.99998	0.964087	0.946744	0.88387	0.84838	157.1	144.6	28	31.9	131.5	107	66.86	24.8	100.49	119.01	76.66	68.63	28.6	179.4	158.7	121.3	146.1	196.6	28.3
QEPAEEYETPESPVPPARSPSPPPKVVDVPSHASQSAR	1xDeamidated [Q1]; 3xPhospho [S12; S19; S21]	P54259	Atrophin-1 OS=Homo sapiens OX=9606 GN=ATN1 PE=1 SV=3	0.243	0.178	0.873	0.773	0.846	3.177	4.748	0.885	0.968	-2.04	-2.49	-0.2	-0.37	-0.24	1.67	2.25	-0.18	-0.05	0.947329	0.666072	0.994762	1	0.959511	0.929559	0.257552	0.997286	0.999557	153.3	37.3	27.3	133.9	118.5	129.6	72.51	100.45	62.53	61.26	66.22	30.8	174.7	19.6	153.8	135.3	16.6	37.4	53.9
VSISFENYR	1xPhospho [S4]	O14730	Serine/threonine-protein kinase RIO3 OS=Homo sapiens OX=9606 GN=RIOK3 PE=1 SV=2	0.814	0.178	0.344	0.39	0.379	0.479	2.127	1.134	1.101	-0.3	-2.49	-1.54	-1.36	-1.4	-1.06	1.09	0.18	0.14	0.999135	0.011979	0.0579678	0.211302	0.506292	0.343845	0.224174	0.959599	0.681184	193.2	157.3	34.4	66.5	75.4	73.2	13.11	34.32	53.77	67.9	47.51	6.89	216.6	209.6	168.5	114.9	233.6	170.6	37.3
DVMSDETNNEETESPSQEFVNITK	1xDeamidated [N/Q]; 1xPhospho [S/T]	P46821	Microtubule-associated protein 1B OS=Homo sapiens OX=9606 GN=MAP1B PE=1 SV=2	0.187	0.179	0.973	0.234	0.193	1.251	1.082	0.24	0.199	-2.42	-2.49	-0.04	-2.1	-2.37	0.32	0.11	-2.06	-2.33	0.999944	0.999682	0.908589	0.999954	1	0.998501	0.99974	0.960001	0.912408	217	40.5	38.8	211.1	50.7	41.9	87.79	48.7	137.38	90.69	27.53	27.87	254.4	0.9	201.8	37.7	13.9	42.2	303.9
IVNVSLADLR	1xPhospho [S5]	Q9HAU0	Pleckstrin homology domain-containing family A member 5 OS=Homo sapiens OX=9606 GN=PLEKHA5 PE=1 SV=1	0.998	0.179	1.201	0.894	0.234	0.896	1.307	0.744	0.195	0	-2.48	0.26	-0.16	-2.1	-0.16	0.39	-0.43	-2.36	0.999976	0.246431	0.998969	0.999981	0.316077	1	0.999967	0.99994	0.188521	133.2	132.9	23.8	160	119.1	31.1	16.98	20.68	108.61	5.73	40.42	111.71	111.2	132.5	94.4	107.5	110.9	153.5	19.9
VPVQEIDDDFFPSSGEEAEAASVGEGGGGGR	1xDeamidated [Q4]; 2xPhospho [S13; S14]	Q03468	DNA excision repair protein ERCC-6 OS=Homo sapiens OX=9606 GN=ERCC6 PE=1 SV=1	0.674	0.18	1.035	0.187	1.194	0.277	6.64	0.18	1.154	-0.57	-2.48	0.05	-2.42	0.26	-1.85	2.73	-2.47	0.21	0.999999	0.997842	0.997917	0.96688	0.999992	0.947265	0.992207	0.83213	0.999677	140.6	94.7	25.3	145.4	26.2	167.8	74.94	66.79	109.01	72.38	131.84	77.89	144.4	14.3	155.7	29	153.2	97.3	22.6
SVYFKPSLTPSGEFR	1xPhospho [S/T]	P49790	Nuclear pore complex protein Nup153 OS=Homo sapiens OX=9606 GN=NUP153 PE=1 SV=2	0.903	0.18	1.037	1.156	5.504	1.28	30.609	1.114	5.308	-0.15	-2.48	0.05	0.21	2.46	0.36	4.94	0.16	2.41	0.936706	0.818797	0.999991	0.999833	0.61215	0.847994	0.120317	0.999997	0.691062	61.4	55.4	11	63.6	70.9	337.7	11.86	87.94	131.79	19.73	109.01	65.3	56	49.5	62.8	3.6	50.6	84.7	10.1
AVSDSFGPGEWDDRK	1xPhospho [S]	Q969X1	Protein lifeguard 3 OS=Homo sapiens OX=9606 GN=TMBIM1 PE=1 SV=2	0.549	0.18	0.594	0.335	0.848	0.611	4.708	0.564	1.426	-0.87	-2.47	-0.75	-1.58	-0.24	-0.71	2.24	-0.83	0.51	0.993934	0.929711	0.609791	0.698049	0.999982	0.932289	0.966457	0.999984	0.699779	171.2	93.9	30.8	101.7	57.3	145.1	17.04	23.88	114.69	90.18	103.92	6.05	131.3	185	156.8	108.5	66.9	86	28.1
GRLTPSPDIIVLSDNEASSPR	2xPhospho [S/T]	Q8WXI9	Transcriptional repressor p66-beta OS=Homo sapiens OX=9606 GN=GATAD2B PE=1 SV=1	1.134	0.18	0.582	1.115	0.49	0.984	2.717	1.916	0.842	0.18	-2.47	-0.78	0.16	-1.03	-0.02	1.44	0.94	-0.25	0.999515	0.528802	0.999998	0.998438	0.991899	0.978002	0.834539	0.999629	0.996779	133.3	151.1	24	77.6	148.7	65.3	68.7	27.81	94.46	34.85	82.33	108.41	203.8	128.7	35.5	157.1	145.9	89.3	7.2
EAYSGCSGPVDSECPPPPSSPVHKAELEKK	2xCarbamidomethyl [C6; C14]; 1xPhospho [S]	Q8N556	Actin filament-associated protein 1 OS=Homo sapiens OX=9606 GN=AFAP1 PE=1 SV=2	0.2	0.181	0.405	0.737	1.069	3.689	5.916	1.821	2.641	-2.32	-2.47	-1.3	-0.44	0.1	1.88	2.56	0.86	1.4	0.331266	0.793128	0.969773	0.998604	1	0.526087	0.826407	0.998799	0.97983	167.1	33.4	30.2	67.6	123.1	178.6	58.65	47.16	124.24	37.76	56.13	61.53	211.7	49.2	175.6	15.7	45.4	35.1	31.7
QVQSRSPPAVPSPPSSTDHSSHFSNFNDNSR	2xPhospho [S6; S12]	P42694	Probable helicase with zinc finger domain OS=Homo sapiens OX=9606 GN=HELZ PE=1 SV=2	1.051	0.181	1.008	0.963	0.947	0.916	5.231	0.955	0.94	0.07	-2.47	0.01	-0.05	-0.08	-0.13	2.39	-0.07	-0.09	0.999986	0.220436	0.993399	0.998803	0.995049	0.999902	0.43303	0.999979	1	116.5	122.4	21.1	117.4	112.2	110.3	51.3	50.99	68.93	72.44	54.65	80.03	60.2	136	192.9	142.9	160.4	49	6.6
KNSSQSLMVPQSGSPEPESIR	1xDeamidated [Q11]; 1xPhospho [S14]	O75970	Multiple PDZ domain protein OS=Homo sapiens OX=9606 GN=MPDZ PE=1 SV=2	1.957	0.181	0.935	0.473	0.429	0.242	2.367	0.506	0.459	0.97	-2.46	-0.1	-1.08	-1.22	-2.05	1.24	-0.98	-1.12	0.999177	0.922176	0.999146	0.948975	0.996494	0.826248	0.995545	0.994574	0.999995	120.6	236	21.9	112.7	57.1	51.8	75.34	70.24	140.65	43.25	45.22	117.32	38.9	210.2	97.6	190.9	37.3	261.5	17.4
GLEELEVPVDPPPSSPAQEALDLLFNCESTEEASGSPAR	1xPhospho [S]; 1xCarbamidomethyl [C27]	Q9NRS6	Sorting nexin-15 OS=Homo sapiens OX=9606 GN=SNX15 PE=1 SV=1	0.057	0.182	0.317	0.132	2.223	2.292	12.244	0.416	7.018	-4.12	-2.46	-1.66	-2.93	1.15	1.2	3.61	-1.27	2.81	0.352739	0.735958	0.850498	0.684935	0.999899	0.987728	0.60919	0.999397	0.73969	153.4	8.8	27.9	48.6	20.2	341.1	115.43	144.44	59.68	141.86	93.26	85.1	457.9	104	31.2	6	2.3	65.6	13.9
TNSMGSATGPLPGTKVEPTVLDR	1xPhospho [S3]	O15014	Zinc finger protein 609 OS=Homo sapiens OX=9606 GN=ZNF609 PE=1 SV=2	0.227	0.182	0.201	0.649	0.532	2.858	2.929	3.226	2.642	-2.14	-2.46	-2.31	-0.62	-0.91	1.51	1.55	1.69	1.4	0.535771	0.334305	0.768359	0.965989	0.690772	0.923108	0.982531	0.993002	0.999989	215	48.8	39	43.3	139.6	114.3	11.83	117.23	51.59	101.86	57.5	86.8	198.9	168.3	213	8.6	45.2	186.4	48.4
NSTPSSSSSLQK	1xPhospho [S/T]; 1xDeamidated [Q11]	Q9P0U3	Sentrin-specific protease 1 OS=Homo sapiens OX=9606 GN=SENP1 PE=1 SV=2	0.834	0.182	1.53	1.803	0.765	2.162	4.211	1.179	0.5	-0.26	-2.46	0.61	0.85	-0.39	1.11	2.07	0.24	-1	0.985422	0.667209	0.999938	0.999888	0.999976	0.998094	0.759596	0.997595	0.998842	98.1	81.9	17.8	150.1	177	75.1	19.03	75.03	116.88	48.03	77.82	33.24	80.1	109.3	116.9	143.1	91.2	17.7	13
SSLHTDWALEPSPLPSSSEDPK	1xPhospho [S/T]	Q7Z5H3	Rho GTPase-activating protein 22 OS=Homo sapiens OX=9606 GN=ARHGAP22 PE=1 SV=1	0.793	0.182	1.338	1.556	1.51	1.962	8.306	1.163	1.128	-0.33	-2.46	0.42	0.64	0.59	0.97	3.05	0.22	0.17	0.999935	0.358458	0.84303	0.737138	0.780682	0.839854	0.048579	0.999923	0.999993	94.1	74.6	17.1	125.9	146.3	142	89.49	45.78	84.5	8.49	20.43	11.91	174	6.6	100.6	29.9	80.7	79.8	1.3
KPYRIESDEEEDFENVGK	1xPhospho [S/Y]	Q96T23	Remodeling and spacing factor 1 OS=Homo sapiens OX=9606 GN=RSF1 PE=1 SV=2	0.042	0.182	0.049	0.883	0.639	20.769	3.517	17.886	12.954	-4.56	-2.46	-4.34	-0.18	-0.65	4.38	1.81	4.16	3.7	0.26361	0.604708	0.33631	0.99694	0.971877	0.47251	0.94669	0.571885	0.736621	214.6	9.1	39	10.6	189.4	137.2	14.18	160.3	79.69	115.15	69.17	78.81	238.2	180.5	226.2	0.3	186.4	9.6	41.1
ATSPLVSLYPALECR	1xPhospho [S/T]; 1xCarbamidomethyl [C14]	Q96G74	OTU domain-containing protein 5 OS=Homo sapiens OX=9606 GN=OTUD5 PE=1 SV=1	0.971	0.182	0.995	0.055	1.013	0.057	5.567	0.055	1.018	-0.04	-2.46	-0.01	-4.18	0.02	-4.14	2.48	-4.17	0.03	0.998886	0.496877	0.946493	0.104285	1	0.0570606	0.498135	0.375384	0.947049	142.3	138.2	25.9	141.6	7.9	144.1	63.67	12.54	41.3	85.22	82.42	56.4	220.8	43.1	163	158.2	181.4	141.3	29.6
SIEVENDFLPVEK	1xPhospho [S1]; 1xDeamidated [N6]	Q96B97	SH3 domain-containing kinase-binding protein 1 OS=Homo sapiens OX=9606 GN=SH3KBP1 PE=1 SV=2	0.456	0.182	0.151	0.034	0.108	0.074	0.593	0.224	0.713	-1.13	-2.46	-2.72	-4.88	-3.21	-3.75	-0.75	-2.16	-0.49	0.999676	0.842694	0.904641	0.0624021	0.477399	0.0995417	0.981885	0.299655	0.956388	310.7	141.6	56.6	47.1	10.5	33.6	77.59	93.05	44.68	102.16	81.41	66.35	306.5	26.9	364.6	139.7	345.5	30.5	85.2
VTDALPEPEPPGAMAASEDEEEEEEALEAMQSR	1xOxidation [M14]; 1xPhospho [S17]	Q9Y3E7	Charged multivesicular body protein 3 OS=Homo sapiens OX=9606 GN=CHMP3 PE=1 SV=3	0.052	0.182	1.249	0.118	0.155	2.268	0.848	0.095	0.124	-4.26	-2.46	0.32	-3.08	-2.69	1.18	-0.24	-3.4	-3.01	0.15301	0.987885	0.999927	0.963627	0.820613	0.457517	0.988661	0.908622	0.711583	217.7	11.4	39.7	271.9	25.8	33.6	82.43	103.78	98.47	72.85	134.89	27.99	19.4	215	318.7	0.7	11.2	28.2	39.2
QLQEDQENNLQDNQTSNSSPCR	1xDeamidated [Q]; 1xPhospho [S]; 1xCarbamidomethyl [C21]	Q92576	PHD finger protein 3 OS=Homo sapiens OX=9606 GN=PHF3 PE=1 SV=3	0.854	0.182	0.464	0.335	0.257	0.392	1.412	0.722	0.555	-0.23	-2.46	-1.11	-1.58	-1.96	-1.35	0.5	-0.47	-0.85	0.994707	0.0471732	0.402255	0.0320456	0.170116	0.0753286	0.963698	0.592177	0.987675	194.1	165.6	35.4	90	64.9	50	35.29	60.33	67.56	42.92	69.15	32	166.1	172	298.7	294.5	87.9	146.8	18.1
NLNNSNLFSPVNR	1xDeamidated [N]; 1xPhospho [S]	P52948	Nuclear pore complex protein Nup98-Nup96 OS=Homo sapiens OX=9606 GN=NUP98 PE=1 SV=4	1.513	0.182	0.776	5.018	0.273	3.316	1.497	6.468	0.352	0.6	-2.45	-0.37	2.33	-1.87	1.73	0.58	2.69	-1.51	0.999999	0.330759	0.99961	0.648539	0.634473	0.696285	0.990875	0.481394	0.796046	68.5	103.6	12.5	53.1	343.6	18.7	34.01	39.59	139.34	27.85	11.42	116.07	66.6	104	55	45.7	105.6	100.8	12.1
LEKPETQSSPITVQSSK	1xPhospho [S/T]	Q96CB8	Integrator complex subunit 12 OS=Homo sapiens OX=9606 GN=INTS12 PE=1 SV=1	0.448	0.183	0.428	0.629	1.727	1.402	9.451	1.467	4.032	-1.16	-2.45	-1.22	-0.67	0.79	0.49	3.24	0.55	2.01	0.995537	0.686966	0.954456	0.999871	0.999493	0.999802	0.509436	0.988894	0.85192	135.9	60.9	24.8	58.2	85.4	234.7	44.07	95.1	133.25	113.54	73.49	64.91	143.9	124.5	53.9	23	55.8	177	4
RQSNLQEVLER	1xPhospho [S3]	O75665	Centriole and centriolar satellite protein OFD1 OS=Homo sapiens OX=9606 GN=OFD1 PE=1 SV=1	0.098	0.183	0.076	0.121	0.184	1.228	1.003	1.597	2.431	-3.35	-2.45	-3.73	-3.05	-2.44	0.3	0	0.68	1.28	0.864439	0.941954	0.986146	0.997908	0.98775	0.978356	0.999726	0.999921	1	361.1	35.5	66.2	27.3	43.6	66.4	83.98	152.43	144.13	151.83	136.29	13.85	296.6	197.4	15.4	0.9	19.4	229	1.2
GICPKSPSAIPEQNHSLNDQAK	1xCarbamidomethyl [C3]; 1xPhospho [S]	Q13129	Zinc finger protein Rlf OS=Homo sapiens OX=9606 GN=RLF PE=1 SV=2	0.094	0.183	0.32	0.179	0.367	1.904	2	0.562	1.147	-3.41	-2.45	-1.65	-2.48	-1.45	0.93	1	-0.83	0.2	0.572191	0.59054	0.722151	0.612399	0.997402	1	0.828262	0.999951	0.919078	280	26.4	51.3	89.5	50.2	102.6	59.65	109.47	76.59	122.86	61.47	122.31	214.4	74.7	312.9	83.7	7.7	20.2	59.3
TPEPVVPTAPELRPSTSTDRPVTPKPTSR	1xPhospho [S/T]	Q14676	Mediator of DNA damage checkpoint protein 1 OS=Homo sapiens OX=9606 GN=MDC1 PE=1 SV=3	1.979	0.183	2.029	1.85	1.967	0.935	10.729	0.912	0.969	0.99	-2.45	1.02	0.89	0.98	-0.1	3.42	-0.13	-0.05	0.997377	0.999985	0.637101	0.700265	0.708165	0.906471	0.620962	0.999997	0.999994	66.6	131.8	12.2	135.1	123.2	131	98.88	82.66	125.67	23.18	14.08	17.01	2.4	64.2	135.3	127	142.4	4.6	10.7
ELQKKEEENADSDDEGELQDLLSQDWR	1xPhospho [S12]	Q96NB3	Zinc finger protein 830 OS=Homo sapiens OX=9606 GN=ZNF830 PE=1 SV=2	0.255	0.184	0.183	0.247	0.102	0.968	0.556	1.346	0.556	-1.97	-2.45	-2.45	-2.02	-3.29	-0.05	-0.85	0.43	-0.85	0.398604	0.661793	0.333943	0.861772	0.269839	0.947269	0.967208	0.90713	0.999983	304.4	77.7	55.9	55.8	75.2	31	22.66	132.01	90.05	60.9	106.91	61.84	298.1	202.8	208	53.1	2.8	280.9	29.7
LTPVSLSNSPIKGADCQEVPQDKDGYK	1xPhospho [S/T]; 1xCarbamidomethyl [C16]	P46100	Transcriptional regulator ATRX OS=Homo sapiens OX=9606 GN=ATRX PE=1 SV=6	1.177	0.184	1.159	1.044	1.291	0.887	7.029	0.901	1.114	0.24	-2.45	0.21	0.06	0.37	-0.17	2.81	-0.15	0.16	0.997552	0.89295	0.753971	0.761718	0.699113	0.938723	0.199594	1	0.999998	102.5	120.6	18.8	118.8	107	132.3	83.57	76.86	35.48	12.33	14.49	16.51	142.6	4.5	115.6	11.1	136.1	144.4	23.6
SASPERMD	2xPhospho [S1; S3]	Q16629	Serine/arginine-rich splicing factor 7 OS=Homo sapiens OX=9606 GN=SRSF7 PE=1 SV=1	1.376	0.184	0.938	0.599	0.522	0.436	2.839	0.639	0.557	0.46	-2.44	-0.09	-0.74	-0.94	-1.2	1.51	-0.65	-0.85	0.999577	0.0622986	0.996068	0.366835	0.342731	0.243676	0.866182	0.624656	0.594475	129.9	178.8	23.9	121.8	77.9	67.8	26.08	16.09	106.13	23.22	43.55	26.44	122.5	186.3	120.8	180.5	168.6	131.1	19.2
AAEEQGDDQDSEKSKPAGSDGERR	1xDeamidated [Q5]; 3xPhospho [S11; S14; S19]	Q1KMD3	Heterogeneous nuclear ribonucleoprotein U-like protein 2 OS=Homo sapiens OX=9606 GN=HNRNPUL2 PE=1 SV=1	0.459	0.184	0.151	0.412	0.675	0.897	3.669	2.721	4.461	-1.12	-2.44	-2.72	-1.28	-0.57	-0.16	1.88	1.44	2.16	0.999102	0.984263	0.833625	1	0.995454	0.999631	0.85345	0.805682	0.565246	208.2	95.6	38.3	31.5	85.7	140.6	84.01	65.77	62.72	71.41	82.68	45.89	8	265.6	211.2	55.1	97	207.7	25.6
SGASGSWDCGLSR	1xPhospho [S6]; 1xCarbamidomethyl [C9]	Q99704	Docking protein 1 OS=Homo sapiens OX=9606 GN=DOK1 PE=1 SV=1	0.899	0.184	0.885	0.943	0.165	1.049	0.895	1.066	0.186	-0.15	-2.44	-0.18	-0.08	-2.6	0.07	-0.16	0.09	-2.42	0.999442	0.233826	0.999976	0.999552	0.0164038	1	0.595622	0.999991	0.0217551	147.2	132.4	27.1	130.2	138.8	24.3	34.02	16.6	94.07	25.97	21.15	84.81	106.9	208.5	140.7	139.4	126.5	99.7	25.9
GLCTSPAEHQYFMTEYVATR	1xCarbamidomethyl [C3]; 1xDeamidated [Q10]; 1xPhospho [Y16]	Q13164	Mitogen-activated protein kinase 7 OS=Homo sapiens OX=9606 GN=MAPK7 PE=1 SV=2	1.013	0.185	0.094	0.199	0.274	0.197	1.485	2.127	2.926	0.02	-2.44	-3.42	-2.33	-1.87	-2.35	0.57	1.09	1.55	0.998987	0.0545415	0.00474499	0.109193	0.226311	0.191328	0.940309	0.45681	0.246053	217	219.8	40.1	20.3	43.2	59.5	12.76	56.3	78.98	69.64	26.74	36.31	239.4	235.9	188.8	79	307.9	239	11
SSPLPAK	1xPhospho [S]	Q7L2J0	7SK snRNA methylphosphate capping enzyme OS=Homo sapiens OX=9606 GN=MEPCE PE=1 SV=1	1.372	0.185	1.035	0.394	0.662	0.287	3.584	0.381	0.64	0.46	-2.44	0.05	-1.34	-0.59	-1.8	1.84	-1.39	-0.64	0.979284	0.0521851	0.991841	0.622349	0.969112	0.273855	0.178104	0.32769	0.767926	129.1	177.1	23.9	133.6	50.9	85.5	25.6	24.18	82.77	20.86	74.5	38.06	81.1	126.2	136.1	173.1	109.6	173.4	23.3
SVEDEMDSPGEEPFYTGQGR	1xPhospho [S8]; 1xDeamidated [Q18]	Q12857	Nuclear factor 1 A-type OS=Homo sapiens OX=9606 GN=NFIA PE=1 SV=2	0.632	0.185	0.744	0.615	0.502	0.973	2.71	0.826	0.674	-0.66	-2.43	-0.43	-0.7	-1	-0.04	1.44	-0.28	-0.57	0.978574	0.159249	0.986019	0.981353	0.250925	1	0.999541	1	0.552686	163.1	103.1	30.2	121.4	100.3	81.8	22.34	5.24	101.84	29.15	11.97	72.28	193	122	166.6	101.1	105.3	112.1	12.6
AQSPTPSLPASWK	1xPhospho [S3]	Q9UMS6	Synaptopodin-2 OS=Homo sapiens OX=9606 GN=SYNPO2 PE=1 SV=2	1.144	0.185	0.978	0.347	0.164	0.304	0.884	0.355	0.168	0.19	-2.43	-0.03	-1.53	-2.61	-1.72	-0.18	-1.49	-2.58	0.999994	0.321253	0.977921	0.412343	0.237418	0.350616	0.999914	0.798781	0.570638	157.1	179.8	29.1	153.6	54.6	25.8	43.73	31	102.1	52.7	5.6	133.07	241.3	114.1	126.2	229.9	134.3	144.4	19.7
TERPRSAVEQLCLAESTRPR	1xPhospho [S6]; 1xCarbamidomethyl [C12]	Q9HAU0	Pleckstrin homology domain-containing family A member 5 OS=Homo sapiens OX=9606 GN=PLEKHA5 PE=1 SV=1	0.209	0.185	1.071	0.868	0.494	4.143	2.666	0.81	0.461	-2.26	-2.43	0.1	-0.2	-1.02	2.05	1.41	-0.3	-1.12	0.932992	0.466348	0.955331	0.923964	0.974979	0.458548	0.856611	0.999995	0.63798	156.8	32.8	29.1	167.9	136	77.5	76.21	55.96	50.9	25.42	36.16	90.01	158	17.5	198.4	28.9	75.1	33.1	9.8
GVEPSPSPIKPGDIK	1xPhospho [S]	Q92890	Ubiquitin recognition factor in ER-associated degradation protein 1 OS=Homo sapiens OX=9606 GN=UFD1 PE=1 SV=3	1.539	0.186	1.746	1.326	6.557	0.862	35.288	0.759	3.755	0.62	-2.43	0.8	0.41	2.71	-0.22	5.14	-0.4	1.91	0.758112	0.375298	0.635463	0.999987	0.312902	0.832231	0.0116616	0.719815	0.987382	48.6	74.7	9	84.8	64.4	318.5	60.02	110.19	80.38	63.18	75.35	63.94	45.9	11.3	51.2	324.3	34.8	70.6	1.3
KASVVDPSTESSPAPQEGSEQPASPASPLSSR	2xPhospho [S/T]; 1xDeamidated [Q]	Q66K14	TBC1 domain family member 9B OS=Homo sapiens OX=9606 GN=TBC1D9B PE=1 SV=3	1.436	0.187	0.104	0.153	1.042	0.106	5.587	1.462	9.989	0.52	-2.42	-3.26	-2.71	0.06	-3.24	2.48	0.55	3.32	0.995397	0.857332	0.452779	0.520557	0.972542	0.281133	0.998406	0.999995	0.852536	153	219.7	28.5	16	23.3	159.4	29.57	15.87	120.44	136.58	39.98	93.24	156.9	84.9	139.9	200.9	239.1	174.4	14.4
SEACPCQPDSGSPLPAEEEK	2xCarbamidomethyl [C4; C6]; 1xPhospho [S]	Q14160	Protein scribble homolog OS=Homo sapiens OX=9606 GN=SCRIB PE=1 SV=5	0.538	0.187	0.899	0.67	0.13	1.244	0.698	0.745	0.145	-0.89	-2.42	-0.15	-0.58	-2.94	0.31	-0.52	-0.43	-2.79	0.782883	0.0959454	0.488503	0.975377	0.0356775	0.991103	0.989399	0.872501	0.53437	175.2	94.3	32.7	157.5	117.3	22.8	19.19	31.11	50.56	78.15	8.77	11.85	234.6	186.4	161.3	64.1	123.3	100.4	22.2
LSSSSPGATVSPSSSDAEYDKLPDADLAR	2xPhospho [S/T]	Q8NI08	Nuclear receptor coactivator 7 OS=Homo sapiens OX=9606 GN=NCOA7 PE=1 SV=2	0.735	0.187	0.751	0.178	0.74	0.243	3.96	0.237	0.986	-0.44	-2.42	-0.41	-2.49	-0.43	-2.04	1.99	-2.08	-0.02	0.932995	0.325841	0.999928	0.876317	0.982081	0.999976	0.682062	0.94425	0.996724	167.1	122.8	31.2	125.5	29.8	123.7	31.76	80.31	123.74	19.77	106.69	77.87	230	123.7	158.4	7.9	142.9	116.3	0.3
DDATPVRDEPMDAESITFK	1xPhospho [T4]	Q7Z6E9	E3 ubiquitin-protein ligase RBBP6 OS=Homo sapiens OX=9606 GN=RBBP6 PE=1 SV=1	0.757	0.188	0.112	0.952	2.458	1.257	13.105	8.477	21.893	-0.4	-2.41	-3.15	-0.07	1.3	0.33	3.71	3.08	4.45	0.990267	0.880811	0.66149	0.974817	0.944334	0.99999	0.416132	0.287861	0.23123	109.8	83.1	20.6	12.3	104.5	269.8	90.85	20.54	6	57.17	16.96	80.02	224.5	126.8	7.5	81	96	121.5	25.6
RSSDSWEVWGSASTNR	1xPhospho [S]	Q8N6T3	ADP-ribosylation factor GTPase-activating protein 1 OS=Homo sapiens OX=9606 GN=ARFGAP1 PE=1 SV=2	0.864	0.188	1.111	1.278	0.345	1.479	1.838	1.151	0.311	-0.21	-2.41	0.15	0.35	-1.53	0.56	0.88	0.2	-1.69	0.908458	0.130551	0.998239	0.999781	0.547532	0.97261	0.889037	0.99999	0.774119	125.4	108.4	23.5	139.3	160.2	43.3	71.13	83.35	114.38	57.21	44.81	46.21	323.8	95.8	114.4	176.6	15.1	98.9	72.4
SQSASVESIPEVLEECTSPADHSDSASVHDMDYVNPR	2xDeamidated [Q2; N35]; 2xPhospho [S]; 1xCarbamidomethyl [C16]	Q92538	Golgi-specific brefeldin A-resistance guanine nucleotide exchange factor 1 OS=Homo sapiens OX=9606 GN=GBF1 PE=1 SV=3	2.312	0.188	2.294	1.475	0.239	0.638	1.274	0.643	0.104	1.21	-2.41	1.2	0.56	-2.06	-0.65	0.35	-0.64	-3.26	0.997577	0.969637	0.999698	0.999999	0.993916	0.994576	0.999881	0.99896	0.960729	79.9	184.7	15	183.4	117.9	19.1	95.48	78.64	128.29	78.4	77.77	115.8	82.9	14.6	204.4	20.8	264.3	191.8	123
SESLSNCSIGK	1xPhospho [S3]; 1xCarbamidomethyl [C7]	Q92625	Ankyrin repeat and SAM domain-containing protein 1A OS=Homo sapiens OX=9606 GN=ANKS1A PE=1 SV=4	0.989	0.188	0.888	0.989	0.918	1	4.888	1.113	1.034	-0.02	-2.41	-0.17	-0.02	-0.12	0	2.29	0.15	0.05	1	0.0511906	0.999834	0.99999	0.969744	0.999985	0.174017	0.999997	0.994761	120.6	119.3	22.7	107.2	119.3	110.8	13.09	11.64	100.57	13.55	24.76	31.55	112.4	105.8	135.2	111.1	133.9	109.2	21.1
GPQGPGGGGINVQEILTSIMGSPNSHPSEELLK	1xPhospho [S]	Q96QC0	Serine/threonine-protein phosphatase 1 regulatory subunit 10 OS=Homo sapiens OX=9606 GN=PPP1R10 PE=1 SV=1	0.068	0.188	0.441	0.152	0.464	2.227	2.467	0.345	1.052	-3.87	-2.41	-1.18	-2.72	-1.11	1.15	1.3	-1.54	0.07	0.201841	0.73318	0.997934	0.910685	0.987936	0.674748	0.966677	0.990715	0.999949	259.4	17.7	48.8	114.4	39.4	120.3	72.51	141.88	78.82	26.05	137.46	44.8	52.5	343.3	206.2	1.1	107.5	14.1	38.8
DGDSYDPYDFSDTEEEMPQVHTPK	2xPhospho [T22; T/Y]; 1xOxidation [M17]	P25205	DNA replication licensing factor MCM3 OS=Homo sapiens OX=9606 GN=MCM3 PE=1 SV=3	0.183	0.188	0.207	0.179	0.813	0.975	4.325	0.864	3.93	-2.45	-2.41	-2.27	-2.48	-0.3	-0.04	2.11	-0.21	1.97	0.872762	0.833576	0.785349	0.75276	0.999976	0.999817	0.901575	1	0.863259	233.5	42.8	43.9	48.3	41.7	189.8	69.26	20.8	104.73	39.8	130.35	70.1	270.3	37.6	245	44.9	41.2	60.3	12.2
NDAPTPGTSTTPGLR	1xPhospho [S/T]	Q04726	Transducin-like enhancer protein 3 OS=Homo sapiens OX=9606 GN=TLE3 PE=1 SV=2	0.767	0.188	0.726	0.578	0.113	0.753	0.602	0.796	0.156	-0.38	-2.41	-0.46	-0.79	-3.14	-0.41	-0.73	-0.33	-2.68	0.910944	1.46897e-05	0.872573	0.202381	3.72835e-06	0.675324	0.815503	0.733493	1.26366e-05	177.9	136.5	33.5	129.2	102.8	20.1	8.23	14.32	46.56	12.93	12.31	16.75	156.1	183.8	174.2	162.2	123.5	133.7	40.7
RGGSDTNLNFDVPDGILDFHK	1xPhospho [S4]; 1xDeamidated [N9]	Q9ULS5	Transmembrane and coiled-coil domain protein 3 OS=Homo sapiens OX=9606 GN=TMCC3 PE=1 SV=3	0.141	0.188	0.204	1.028	0.872	7.266	4.632	5.049	4.285	-2.82	-2.41	-2.3	0.04	-0.2	2.86	2.21	2.34	2.1	0.645375	0.838994	0.984341	0.998841	0.99997	0.438718	0.908423	0.902399	0.996238	174.7	24.7	32.9	35.6	179.6	152.4	70.46	142.34	131.7	103.28	9.39	61.07	222.4	155.2	32.5	22	167.5	1.4	3.8
ESDTKNEVNGTSEDIKSEGDTQSN	1xDeamidated [N9]; 1xPhospho [S/T]	O95232	Luc7-like protein 3 OS=Homo sapiens OX=9606 GN=LUC7L3 PE=1 SV=2	0.984	0.189	1.204	0.654	0.705	0.665	3.733	0.543	0.585	-0.02	-2.41	0.27	-0.61	-0.5	-0.59	1.9	-0.88	-0.77	0.999948	0.290671	0.999974	0.999993	0.943677	1	0.752677	1	0.890543	126.7	124.7	23.9	152.6	82.9	89.3	46.07	61	27.88	58.41	39.11	68.34	140.6	140.3	51.9	210.3	49	138.1	26.5
RPPSPDVIVLSDNEQPSSPR	2xPhospho [S4; S11]	Q86YP4	Transcriptional repressor p66-alpha OS=Homo sapiens OX=9606 GN=GATAD2A PE=1 SV=1	0.271	0.19	0.026	0.334	1.612	1.232	8.506	12.789	61.771	-1.88	-2.4	-5.26	-1.58	0.69	0.3	3.09	3.68	5.95	0.954562	0.998655	0.333504	0.999906	0.87548	0.98769	0.68561	0.440048	0.0625252	174.8	47.4	33.1	4.6	58.3	281.8	77.77	130.96	95.91	137.01	72.74	14.5	188.6	155.3	13.9	220.2	3	42.1	29.4
EGSPAPLEPEPGAAQPK	1xPhospho [S3]	Q01167	Forkhead box protein K2 OS=Homo sapiens OX=9606 GN=FOXK2 PE=1 SV=3	0.824	0.19	1.218	0.835	0.094	1.013	0.494	0.686	0.077	-0.28	-2.4	0.28	-0.26	-3.42	0.02	-1.02	-0.54	-3.7	0.986185	0.449578	0.999991	0.99426	0.0709827	0.999997	0.802718	0.998625	0.05659	144.2	118.8	27.4	175.6	120.4	13.5	78.3	27.5	12.67	65.9	19.77	78.91	150.3	240.2	24.5	190.1	119.1	123.9	28.5
ANIFVPSSSPVVNQRK	3xDeamidated [N2; N13; Q14]; 3xPhospho [S7; S8; S9]	Q6DHV5	Protein CC2D2B OS=Homo sapiens OX=9606 GN=CC2D2B PE=2 SV=4	0.736	0.19	0.504	0.642	0.396	0.873	2.083	1.275	0.785	-0.44	-2.4	-0.99	-0.64	-1.34	-0.2	1.06	0.35	-0.35	0.996562	0.0245289	0.810522	0.987007	0.347641	0.999982	0.567443	0.987682	0.948581	173	127.3	32.9	87.2	111.1	68.5	30.82	22.96	93.25	16.6	12.6	23.83	97.9	167.7	185.7	96.2	153.3	123.4	31.9
AKLDSLQDIGMDHQALLK	1xPhospho [S5]; 1xOxidation [M11]	P80303	Nucleobindin-2 OS=Homo sapiens OX=9606 GN=NUCB2 PE=1 SV=3	0.445	0.19	0.21	0.155	0.299	0.348	1.57	0.735	1.419	-1.17	-2.39	-2.25	-2.69	-1.74	-1.52	0.65	-0.44	0.5	0.758457	0.35389	0.280946	0.0757417	0.617033	0.517904	0.995478	0.95159	0.982629	261	116.1	49.6	54.9	40.4	78	49.6	34.02	72.8	56.49	83.91	35.35	260.2	92.1	287.4	115.7	61.9	126	41
SSDPLDSGTRSPKRDPIDPVSAGASAAK	1xPhospho [S11]	O15056	Synaptojanin-2 OS=Homo sapiens OX=9606 GN=SYNJ2 PE=1 SV=3	0.131	0.19	0.573	0.37	0.482	2.83	2.531	0.647	0.841	-2.93	-2.39	-0.8	-1.43	-1.05	1.5	1.34	-0.63	-0.25	0.262575	0.145713	0.998624	0.910972	0.998889	0.773351	0.252433	0.988059	1	218.5	28.6	41.6	125.1	80.9	105.3	45.53	114.57	50.04	42.74	38.43	74.76	74.2	196.7	198.5	25.7	16.4	143.7	51.1
MEKPYNKNEGNLENEGKPEDEVEPDDEGKSDEEEKPDVEGK	1xAcetyl [N-Term]; 2xDeamidated [N]; 1xPhospho [S30]	Q969E4	Transcription elongation factor A protein-like 3 OS=Homo sapiens OX=9606 GN=TCEAL3 PE=1 SV=1	0.183	0.191	0.704	0.498	0.782	2.718	4.102	0.708	1.111	-2.45	-2.39	-0.51	-1.01	-0.35	1.44	2.04	-0.5	0.15	0.669984	0.846001	0.939895	0.955674	1	0.982116	0.855944	1	0.945694	178.7	32.7	34.1	125.7	89	139.7	83.69	131.16	67.23	141.33	68.57	96.29	100.4	53.2	284.4	2	100.8	18.4	15.1
RPTLAWLEDSSSCSDIPKLEGDSDDLLEDSDSEEHSR	1xCarbamidomethyl [C13]; 1xPhospho [S30]	Q9NR09	Baculoviral IAP repeat-containing protein 6 OS=Homo sapiens OX=9606 GN=BIRC6 PE=1 SV=3	0.127	0.191	0.148	0.157	0.147	1.239	0.77	1.063	0.994	-2.98	-2.39	-2.76	-2.67	-2.77	0.31	-0.38	0.09	-0.01	0.465795	0.512557	0.595703	0.681216	0.765726	0.998658	0.997064	0.999986	0.999555	339.2	43	64.7	50.1	53.2	49.8	123.46	62.73	133.75	59.23	28.97	20.56	952	215.2	23.7	6.6	33.4	27.3	221.1
TEVALAKDMESPTKLDVTLAK	1xPhospho [S/T]	P27816	Microtubule-associated protein 4 OS=Homo sapiens OX=9606 GN=MAP4 PE=1 SV=3	0.062	0.191	0.142	0.13	0.033	2.101	0.171	0.913	0.23	-4.01	-2.39	-2.81	-2.94	-4.93	1.07	-2.54	-0.13	-2.12	0.552153	0.996122	0.613943	0.898317	0.283264	0.981483	0.513578	0.991449	0.983881	384.9	23.8	73.6	54.9	50.1	12.6	89.47	60.88	138.94	75.42	19.03	42.19	519.8	12.3	326.7	42.1	12.8	20.2	502.9
LAEDDWTGMESEEENKKDDEEMDIDTVK	1xPhospho [S/T]	O95149	Snurportin-1 OS=Homo sapiens OX=9606 GN=SNUPN PE=1 SV=1	0.158	0.191	0.076	0.996	0.253	6.31	1.321	13.039	3.31	-2.66	-2.39	-3.71	-0.01	-1.98	2.66	0.4	3.7	1.73	0.935696	0.981258	0.848088	0.999964	0.979907	0.874157	1	0.759242	0.996438	224.4	35.4	42.9	17.1	223.4	56.7	76.53	50.96	59.93	152.21	81.53	84.32	213.9	235.1	18.7	33.8	66.3	26	31.4
HSSPHQSEDEEDPR	2xPhospho [S3; S7]	P13807	Glycogen [starch] synthase, muscle OS=Homo sapiens OX=9606 GN=GYS1 PE=1 SV=2	0.709	0.191	0.885	0.84	0.278	1.185	1.452	0.949	0.314	-0.5	-2.39	-0.18	-0.25	-1.85	0.24	0.54	-0.08	-1.67	0.639693	0.000189164	0.897563	0.978665	0.000743662	0.950044	0.92649	0.999274	0.00375334	153.7	109	29.4	136	129.1	42.7	26.35	34.82	23.42	25.86	36	27.64	148.7	206.1	124.1	152.7	75.8	105.4	37.1
YVAGETNAKENENSSPVAGAFGVFSTISTAVQSTGK	2xDeamidated [N11; N]; 1xPhospho [S]	Q9NRY5	Protein FAM114A2 OS=Homo sapiens OX=9606 GN=FAM114A2 PE=1 SV=4	0.409	0.191	2.416	2.622	2.496	6.409	13.036	1.085	1.033	-1.29	-2.38	1.27	1.39	1.32	2.68	3.7	0.12	0.05	0.840799	0.328502	0.999908	0.999995	0.99405	0.891669	0.153576	0.999185	0.999551	65.7	26.9	12.6	158.7	172.2	164	126.12	62.12	142.79	45.18	71.51	2.08	392.1	58.4	29.1	53.6	23.9	16.8	11.2
SISEIKPPNLFPLAPQEITHCHDEDDDEEEEEEEE	1xPhospho [S3]; 1xDeamidated [Q16]; 1xCarbamidomethyl [C21]	P49902	Cytosolic purine 5'-nucleotidase OS=Homo sapiens OX=9606 GN=NT5C2 PE=1 SV=1	3.245	0.192	1.613	0.104	1.8	0.032	9.388	0.065	1.115	1.7	-2.38	0.69	-3.26	0.85	-4.96	3.23	-3.95	0.16	0.685428	0.995291	0.917753	0.96196	0.945688	0.274939	0.741556	0.514122	0.999998	75.4	244.8	14.5	121.7	7.9	135.8	73.58	32.51	159.96	56.72	158.89	8.49	11.4	83.7	53	137.7	257	171.9	3.8
SGDETPGSEVPGDKAAEEQGDDQDSEKSKPAGSDGER	1xDeamidated [Q19]; 1xPhospho [S]	Q1KMD3	Heterogeneous nuclear ribonucleoprotein U-like protein 2 OS=Homo sapiens OX=9606 GN=HNRNPUL2 PE=1 SV=1	0.021	0.192	0.405	0.992	1.553	46.631	8.094	2.448	3.832	-5.55	-2.38	-1.3	-0.01	0.64	5.54	3.02	1.29	1.94	0.917637	0.999902	0.999985	0.991877	0.966185	0.650531	0.908982	0.976662	0.931044	144.1	3.1	27.7	58.4	142.9	223.8	92.55	166.53	141.6	119.18	79.27	55	2.2	124.5	206.4	2.6	1.4	152.4	23.9
NSFNNPAYYVLEGVPHQLLPPEPPSPAR	1xDeamidated [N/Q]; 1xPhospho [S25]	O15357	Phosphatidylinositol 3,4,5-trisphosphate 5-phosphatase 2 OS=Homo sapiens OX=9606 GN=INPPL1 PE=1 SV=2	0.214	0.193	0.975	1.143	0.082	5.332	0.427	1.172	0.084	-2.22	-2.38	-0.04	0.19	-3.6	2.41	-1.23	0.23	-3.57	0.711531	0.717433	0.999577	0.930188	0.43089	0.995438	0.994619	0.986119	0.596595	166.3	35.7	32.1	162.2	190.1	13.7	24.69	128.4	7.06	58.45	88.18	63.22	180.2	191.3	116.8	198.9	38.6	4.8	30.9
MSADMSEIEAR	1xPhospho [S2]	O43318	Mitogen-activated protein kinase kinase kinase 7 OS=Homo sapiens OX=9606 GN=MAP3K7 PE=1 SV=1	0.771	0.193	0.819	0.634	0.324	0.822	1.676	0.774	0.395	-0.37	-2.37	-0.29	-0.66	-1.63	-0.28	0.74	-0.37	-1.34	0.999234	0.374262	0.99851	0.999988	0.554444	0.999951	0.999219	0.999847	0.35139	160.4	123.7	31	131.3	101.7	51.9	62.96	18.67	23.55	6.22	30.25	94.55	160.7	190.4	36.9	124	104.1	151.1	45
CSPGSPTDPNATLSKDEAAVHQDGKPR	1xCarbamidomethyl [C1]; 1xPhospho [S5]; 1xDeamidated [N10]	Q9P0K8	Forkhead box protein J2 OS=Homo sapiens OX=9606 GN=FOXJ2 PE=1 SV=1	1.18	0.193	1.266	0.188	0.057	0.16	0.293	0.149	0.045	0.24	-2.37	0.34	-2.41	-4.14	-2.65	-1.77	-2.75	-4.48	0.995672	0.983182	0.989327	0.988194	0.890683	0.872731	0.998476	1	0.996867	154.5	182.2	29.9	195.6	29.1	8.7	65.6	6.88	130.95	85.34	118.95	152.39	163.4	140.3	27.9	149.3	165.5	170.6	9.8
YQKLPSDEDESGTEESDNTPLLK	1xDeamidated [N/Q]; 1xPhospho [S/Y]	Q9ULH0	Kinase D-interacting substrate of 220 kDa OS=Homo sapiens OX=9606 GN=KIDINS220 PE=1 SV=3	0.227	0.193	0.097	1.038	0.288	4.575	1.491	10.733	2.982	-2.14	-2.37	-3.37	0.05	-1.79	2.19	0.58	3.42	1.58	0.562744	0.446541	0.576615	0.999835	0.910338	0.704119	0.93849	0.717612	0.982427	211	47.9	40.8	20.4	219.1	60.9	47.87	43.89	76.04	139.96	72.12	84.02	218.2	218.3	76.5	19.9	51.6	49.5	42.2
LCLAHSPPVK	1xCarbamidomethyl [C2]; 1xPhospho [S6]	Q9UQK1	Protein phosphatase 1 regulatory subunit 3C OS=Homo sapiens OX=9606 GN=PPP1R3C PE=1 SV=2	0.647	0.194	0.685	0.365	0.097	0.564	0.499	0.533	0.141	-0.63	-2.37	-0.55	-1.45	-3.37	-0.83	-1	-0.91	-2.82	0.9549	0.0311263	0.975569	0.57172	0.00127942	0.954261	0.422495	0.924433	0.00401841	200.9	129.9	39	137.6	73.3	19.5	18.15	12.49	53.54	8.57	35.87	84.53	146.2	202.7	205.9	141	131	109.9	39.3
AHSEKDQPPFGDSDDSVEADKSSPGIHLER	1xDeamidated [Q7]; 2xPhospho [S13; S16]	Q14676	Mediator of DNA damage checkpoint protein 1 OS=Homo sapiens OX=9606 GN=MDC1 PE=1 SV=3	0.048	0.194	1.269	1.102	0.778	22.719	4.006	0.868	0.613	-4.37	-2.36	0.34	0.14	-0.36	4.51	2	-0.2	-0.71	0.0458519	0.719541	0.995836	0.968129	0.997538	0.159638	0.915999	0.80384	0.934151	136.6	6.6	26.5	173.4	150.5	106.3	64.76	100.43	27.21	24.44	82.33	70.94	234.5	148.8	48.3	19.1	7.2	1.1	27.7
QGEDLAHVQHPTGAGPHAQEEDSQEEEEEDEEAASR	1xPhospho [S/T]	Q9NW97	Transmembrane protein 51 OS=Homo sapiens OX=9606 GN=TMEM51 PE=1 SV=1	1.837	0.194	2.574	2.557	3.543	1.392	18.233	0.993	1.376	0.88	-2.36	1.36	1.35	1.82	0.48	4.19	-0.01	0.46	0.997715	0.326855	0.793846	0.818325	0.886624	0.962952	0.0639417	1	0.999928	51.3	94.2	10	132	131.1	181.6	83.33	62.41	18.83	42.84	44.35	73.32	135.9	64	16.5	117.5	24.4	120.4	9.7
SSPSLSDSYSHLSGRPIR	1xPhospho [S]	O75420	GRB10-interacting GYF protein 1 OS=Homo sapiens OX=9606 GN=GIGYF1 PE=1 SV=2	0.272	0.195	0.998	0.664	0.181	2.444	0.933	0.665	0.182	-1.88	-2.36	0	-0.59	-2.46	1.29	-0.1	-0.59	-2.46	0.27873	0.835192	1	0.935531	0.217287	0.753065	0.803675	0.947282	0.23227	181.3	49.2	35.3	181	120.3	32.9	3.42	103.81	108.03	11.23	65.25	65.05	172.1	177.5	165.8	2.2	114.6	46.7	33.5
IESDEEEDFENVGK	1xPhospho [S3]	Q96T23	Remodeling and spacing factor 1 OS=Homo sapiens OX=9606 GN=RSF1 PE=1 SV=2	1.042	0.195	0.763	0.861	0.818	0.826	4.203	1.129	1.072	0.06	-2.36	-0.39	-0.22	-0.29	-0.27	2.07	0.18	0.1	0.999996	0.435276	0.995603	0.561498	0.992408	0.628874	0.743934	0.828955	1	128.2	133.7	24.9	97.8	110.5	104.9	16.12	16.09	97.56	9.78	78.37	27.19	160.9	130.5	118.1	141.5	103.7	136	25.4
RSSTSGDTEEEEEEEVVPFSSDEQK	2xPhospho [S/T]	O15231	Zinc finger protein 185 OS=Homo sapiens OX=9606 GN=ZNF185 PE=1 SV=3	1.21	0.195	0.136	0.593	1.03	0.49	5.287	4.376	7.595	0.27	-2.36	-2.88	-0.75	0.04	-1.03	2.4	2.13	2.93	0.999956	0.834405	0.935895	0.999294	0.999981	0.999989	0.755043	0.990674	0.883318	144.1	174.3	28.1	19.5	85.5	148.4	85.32	73.38	114.37	138.07	87.19	68.43	124.7	254	25	17.8	150.8	169.4	24.3
SVPTFTVIPEGPRSPSPLMVVDNEEEPMEGVPLEQYR	2xPhospho [S16; S/T]; 1xDeamidated [N23]	Q9C086	INO80 complex subunit B OS=Homo sapiens OX=9606 GN=INO80B PE=1 SV=2	0.799	0.195	0.219	0.153	0.106	0.191	0.542	0.696	0.483	-0.32	-2.36	-2.19	-2.71	-3.24	-2.39	-0.88	-0.52	-1.05	1	0.926545	0.642705	0.605699	0.759308	0.609657	0.998431	1	0.999928	242.8	193.9	47.4	53.2	37	25.7	68.4	63.88	31.44	120.92	85.31	40.35	278.5	286	42.6	52.9	222.4	281.1	54.3
EGLSGDALSSPSAPEPVVGTPDDKLDADYIKR	1xPhospho [S/T]	Q92503	SEC14-like protein 1 OS=Homo sapiens OX=9606 GN=SEC14L1 PE=1 SV=2	0.113	0.195	0.085	0.143	0.184	1.265	0.945	1.692	2.176	-3.14	-2.36	-3.56	-2.8	-2.44	0.34	-0.08	0.76	1.12	0.182818	0.383757	0.241729	0.872326	0.7266	0.696349	0.986931	0.797243	0.920446	348.6	39.5	68.1	29.5	50	64.3	92.11	82.34	76.14	30.68	107.57	22.66	314.3	36.9	652	55	3.7	35.6	6.6
SASPHDVDLCLVSPCEFEHRK	1xPhospho [S]; 2xCarbamidomethyl [C10; C15]	Q66K74	Microtubule-associated protein 1S OS=Homo sapiens OX=9606 GN=MAP1S PE=1 SV=2	0.248	0.195	0.231	0.15	0.044	0.604	0.224	0.648	0.19	-2.01	-2.36	-2.11	-2.74	-4.51	-0.73	-2.16	-0.63	-2.4	0.946542	0.987679	0.785048	0.575284	0.0451948	0.962998	0.124225	0.998741	0.335113	321.3	79.6	62.8	74.2	48.1	14.1	89.24	59.14	116.47	31.49	15.49	93.48	491.8	25.2	267.4	66.2	44.9	139	52.2
SSVKTPETVVPTAPELQASASTDQPVTSEPTSR	1xPhospho [S/T]; 1xDeamidated [Q17]	Q14676	Mediator of DNA damage checkpoint protein 1 OS=Homo sapiens OX=9606 GN=MDC1 PE=1 SV=3	0.226	0.195	1.03	0.21	0.19	0.931	0.975	0.204	0.185	-2.15	-2.36	0.04	-2.25	-2.39	-0.1	-0.04	-2.29	-2.44	0.863828	0.607471	1	0.73953	0.238753	0.999807	0.968713	0.777633	0.26461	210.4	47.5	41.1	216.7	44.2	40.1	78.4	123.02	29.86	58.07	21.87	81.1	366.9	41.5	214.5	257.9	14.9	48.4	26
KPSVSEEVQATPNK	1xPhospho [S/T]	Q9UKJ3	G patch domain-containing protein 8 OS=Homo sapiens OX=9606 GN=GPATCH8 PE=1 SV=2	0.567	0.196	0.313	3.167	12.014	5.59	61.448	10.128	38.42	-0.82	-2.35	-1.68	1.66	3.59	2.48	5.94	3.34	5.26	0.974265	0.619404	0.951434	0.664044	0.0656431	0.288167	0.00458555	0.242925	0.0156895	34.8	19.7	6.8	10.9	110.1	417.7	79.73	80.01	63.86	69.37	85.72	53.31	39.1	7.8	69.9	22.2	4.4	39.9	4.3
RLSSLRASTSK	3xPhospho [S3; S4; S8]	P62753	Small ribosomal subunit protein eS6 OS=Homo sapiens OX=9606 GN=RPS6 PE=1 SV=1	1.036	0.196	0.825	0.478	0.05	0.461	0.257	0.579	0.061	0.05	-2.35	-0.28	-1.07	-4.31	-1.12	-1.96	-0.79	-4.04	0.98876	4.06656e-06	0.924728	0.0107663	2.63166e-09	0.00397337	7.6622e-06	0.0534813	4.56534e-09	167.4	173.5	32.8	138.1	79.9	8.4	19.35	12.77	28.64	4.93	16.89	20.6	127.2	188.6	166.9	198.5	172.9	153.9	32.7
VLTANSNPSSPSAAK	1xPhospho [S]	Q9NV56	MRG/MORF4L-binding protein OS=Homo sapiens OX=9606 GN=MRGBP PE=1 SV=1	1.111	0.196	1.029	1.138	0.743	1.024	3.795	1.106	0.722	0.15	-2.35	0.04	0.19	-0.43	0.03	1.92	0.14	-0.47	0.999743	0.203027	0.999994	0.869629	0.985874	0.738927	0.472945	0.813782	0.969323	115	127.8	22.5	118.3	130.8	85.5	33.89	12.45	73.79	8.53	83.87	59.86	76.2	131	156.6	145.6	169.4	132.8	2.7
LQLERPVSPETQADLQR	1xPhospho [S8]	Q9P206	NHS-like protein 3 OS=Homo sapiens OX=9606 GN=NHSL3 PE=1 SV=2	0.982	0.196	1.087	0.886	0.948	0.903	4.84	0.815	0.872	-0.03	-2.35	0.12	-0.17	-0.08	-0.15	2.28	-0.29	-0.2	0.984262	0.101379	1	0.992768	0.993576	0.999998	0.230848	0.98812	0.989289	117.7	115.5	23	127.9	104.3	111.5	29.24	76.52	85.49	15.08	62.2	60.89	183.6	132.1	103	129.7	15.2	169.8	0.4
METEADAPSPAPSLGERLEPR	2xPhospho [S9; S13]	Q12873	Chromodomain-helicase-DNA-binding protein 3 OS=Homo sapiens OX=9606 GN=CHD3 PE=1 SV=3	0.154	0.196	0.211	0.116	0.087	0.755	0.442	0.55	0.411	-2.7	-2.35	-2.25	-3.11	-3.53	-0.4	-1.18	-0.86	-1.28	0.502303	0.720408	0.904611	0.366386	0.278991	0.999772	0.95087	0.892768	0.80467	340.3	52.3	66.7	71.8	39.5	29.5	70.26	117	121.77	66.03	35.96	37.1	417.2	310.7	58.5	47.7	6.1	182.4	60.9
ISAISEKPLSPHPIR	1xPhospho [S10]	Q2KHM9	Protein moonraker OS=Homo sapiens OX=9606 GN=KIAA0753 PE=1 SV=3	0.832	0.197	1.035	0.869	1.227	1.045	6.245	0.84	1.185	-0.27	-2.35	0.05	-0.2	0.3	0.06	2.64	-0.25	0.25	0.997282	0.0321164	0.997634	0.99975	0.917638	0.999972	0.00625557	0.978439	0.992924	116.3	96.7	22.9	120.4	101.1	142.7	12.83	9.15	96.62	21.24	9.09	17.45	111.8	113.2	89.2	97.1	92.9	81.2	91.4
KLIDLESPTPESQK	1xPhospho [S7]	O43166	Signal-induced proliferation-associated 1-like protein 1 OS=Homo sapiens OX=9606 GN=SIPA1L1 PE=1 SV=4	0.618	0.197	0.315	0.709	0.577	1.148	2.937	2.248	1.831	-0.7	-2.35	-1.66	-0.5	-0.79	0.2	1.55	1.17	0.87	0.9995	0.295442	0.439112	0.974009	0.973922	0.99788	0.675657	0.836725	0.836985	175.7	108.5	34.5	55.4	124.5	101.4	85.36	111.18	119.95	105.31	37.32	69.27	113	83.3	382	50.6	382.7	69.8	22.2
ITSISPTPEPPAALEDNPDAWGDGSPR	1xPhospho [S/T]	Q14934	Nuclear factor of activated T-cells, cytoplasmic 4 OS=Homo sapiens OX=9606 GN=NFATC4 PE=1 SV=2	0.108	0.197	0.115	0.215	0.103	1.983	0.523	1.871	0.897	-3.21	-2.35	-3.12	-2.22	-3.28	0.99	-0.94	0.9	-0.16	0.68559	0.817721	0.380156	0.781503	0.322449	0.999969	0.929666	0.973433	0.999994	345.4	37.4	68	39.6	74.1	35.5	71.69	138.85	129.65	36.93	4.76	31.56	382	50.5	276.2	14.6	290.3	29.9	13.4
INHTVILDDPFDDPPDLLIPDRSPEPTREQLDSGR	1xPhospho [S23]; 1xDeamidated [N/Q]	Q8WUA2	Peptidyl-prolyl cis-trans isomerase-like 4 OS=Homo sapiens OX=9606 GN=PPIL4 PE=1 SV=1	0.459	0.197	0.741	1.018	0.791	2.219	4.019	1.375	1.068	-1.12	-2.34	-0.43	0.03	-0.34	1.15	2.01	0.46	0.1	0.979322	0.905796	0.997608	0.999991	0.999975	0.99227	0.838666	0.999624	0.989072	142.7	65.5	28.1	105.7	145.3	112.9	136.73	41.7	166.06	14.32	113.36	118.68	54.8	12.9	406.7	41.5	25.2	18.5	1.2
VQSLEGEKLSPKSDISPLTPR	4xPhospho [S10; S13; S16; T19]	P46821	Microtubule-associated protein 1B OS=Homo sapiens OX=9606 GN=MAP1B PE=1 SV=2	1.348	0.197	2.166	1.589	1.358	1.179	6.901	0.734	0.627	0.43	-2.34	1.11	0.67	0.44	0.24	2.79	-0.45	-0.67	0.885318	0.000244556	0.139051	0.597744	0.550519	0.991917	2.58496e-05	0.870352	0.901663	78.4	105.6	15.4	169.7	124.5	106.4	36	25.58	37.73	8.72	24.54	42.92	54.8	112	74.9	100.9	131.3	78.5	14.7
GNPEPPVSGEMDDNSLSPEACYECK	1xDeamidated [N]; 1xPhospho [S]; 2xCarbamidomethyl [C21; C24]	P35555	Fibrillin-1 OS=Homo sapiens OX=9606 GN=FBN1 PE=1 SV=4	0.435	0.197	1.134	0.869	0.506	1.999	2.568	0.766	0.446	-1.2	-2.34	0.18	-0.2	-0.98	1	1.36	-0.38	-1.17	0.999997	0.78319	0.993825	1	0.973732	0.999999	0.382686	0.992818	0.999936	144.9	63	28.5	164.4	125.9	73.3	76.88	76.29	82.64	137.97	77.24	141.9	79	85.6	6.5	70.7	11.8	34.3	20.3
NYGSPLISGSTPK	1xPhospho [S/T]	Q15648	Mediator of RNA polymerase II transcription subunit 1 OS=Homo sapiens OX=9606 GN=MED1 PE=1 SV=4	0.84	0.198	0.709	0.633	0.182	0.754	0.922	0.892	0.257	-0.25	-2.34	-0.5	-0.66	-2.46	-0.41	-0.12	-0.16	-1.96	0.999894	0.0165869	0.954623	0.903135	0.00726238	0.963698	0.995508	0.999964	0.0296144	168.5	141.5	33.3	119.5	106.6	30.7	7.61	24.7	78.64	5.56	3.83	67.27	149.7	174.4	163.9	137.7	121.3	192.2	32.4
SSSSSQESLNRPLSAK	1xPhospho [S]	Q7Z460	CLIP-associating protein 1 OS=Homo sapiens OX=9606 GN=CLASP1 PE=1 SV=1	1.047	0.198	0.072	0.281	0.267	0.268	1.345	3.924	3.721	0.07	-2.34	-3.8	-1.83	-1.91	-1.9	0.43	1.97	1.9	1	0.628166	0.127649	0.757784	0.739002	0.745754	0.999947	0.702377	0.721836	209.5	219.3	41.5	15	58.9	55.8	52.45	52.71	113.16	105.72	62.14	35.59	231.3	219.2	68.5	229.5	229.8	68.9	16.7
ATTPADGEEPAPEAEALAAAR	1xPhospho [T]	Q96S44	EKC/KEOPS complex subunit TP53RK OS=Homo sapiens OX=9606 GN=TP53RK PE=1 SV=2	1.064	0.198	0.827	0.582	0.342	0.547	1.724	0.704	0.413	0.09	-2.34	-0.27	-0.78	-1.55	-0.87	0.79	-0.51	-1.28	0.996507	0.0134954	0.94628	0.669035	0.273542	0.896799	0.469115	0.986272	0.723272	149.5	159.1	29.6	123.7	87	51.1	85.67	14.35	67.12	23.84	26.19	82.71	388.6	81.7	117.4	124.9	144.2	108.1	11
VGDSTPVSEKPVSAAVDANASESP	1xPhospho [S/T]; 1xDeamidated [N19]	Q9H8Y8	Golgi reassembly-stacking protein 2 OS=Homo sapiens OX=9606 GN=GORASP2 PE=1 SV=3	0.946	0.199	0.537	0.505	0.258	0.534	1.301	0.941	0.481	-0.08	-2.33	-0.9	-0.99	-1.95	-0.91	0.38	-0.09	-1.06	1	0.0475598	0.984129	0.963704	0.702411	0.975551	0.42309	0.99999	0.963648	174.2	164.8	34.6	93.5	87.9	45	23.54	24.58	85.78	35.21	30.55	90.05	104.4	163.2	162.4	99.3	153.7	161.9	32.2
DTSQSDKDLDDALDKLSDSLGQR	1xPhospho [S17]	P20810	Calpastatin OS=Homo sapiens OX=9606 GN=CAST PE=1 SV=4	1.084	0.199	0.784	0.837	0.742	0.772	3.733	1.068	0.947	0.12	-2.33	-0.35	-0.26	-0.43	-0.37	1.9	0.09	-0.08	1	0.0324007	0.999999	0.999302	0.986513	0.998328	0.0922738	0.999861	0.993495	129.1	140	25.7	101.2	108.1	95.9	16.72	22.32	103.7	27.79	10.56	14.55	127.5	138.4	99	146.8	94.2	138.2	25.4
KSHSSPSLNPDTSPITAK	2xPhospho [S7; S13]	Q9NYI0	PH and SEC7 domain-containing protein 3 OS=Homo sapiens OX=9606 GN=PSD3 PE=1 SV=2	0.679	0.199	0.01	0.71	0.864	1.046	4.338	68.38	83.205	-0.56	-2.33	-6.59	-0.49	-0.21	0.06	2.12	6.1	6.38	0.998652	0.250245	0.0655883	0.993585	0.999982	0.999986	0.311545	0.154778	0.085033	173.3	117.7	34.5	1.8	123	149.7	7.11	16.6	82.11	167.59	42.88	12.65	162.5	173.2	187.2	117.7	131.4	93.9	1.4
APSAPPGTGALPPAAPSGR	1xPhospho [S3]	Q9H1B7	Probable E3 ubiquitin-protein ligase IRF2BPL OS=Homo sapiens OX=9606 GN=IRF2BPL PE=1 SV=1	0.691	0.199	0.707	0.506	0.141	0.732	0.71	0.716	0.2	-0.53	-2.33	-0.5	-0.98	-2.82	-0.45	-0.5	-0.48	-2.32	0.963664	0.0115323	0.977172	0.591661	0.00151538	0.952425	0.805665	0.931299	0.0047117	184.9	127.9	36.8	130.7	93.6	26.1	12.37	2.75	76.85	32.31	14.04	51.18	151.3	189.7	188.6	124.4	130.4	130.5	37.6
LESPTTPLLDDMDGSQDSPIFMYAPEFK	1xPhospho [S/T]	Q9H3M7	Thioredoxin-interacting protein OS=Homo sapiens OX=9606 GN=TXNIP PE=1 SV=1	1.226	0.199	0.873	0.315	0.308	0.257	1.544	0.36	0.353	0.29	-2.33	-0.2	-1.67	-1.7	-1.96	0.63	-1.47	-1.5	0.999999	0.0737818	0.996423	0.690241	0.350305	0.736419	0.899062	0.910593	0.598577	153	187.6	30.5	133.6	48.1	47.1	36.93	28.61	107.65	16.29	99.66	49.91	225	122.1	126.2	103.3	187.6	154.8	6.6
KSQMEEVQDELIHR	1xPhospho [S2]	Q12929	Epidermal growth factor receptor kinase substrate 8 OS=Homo sapiens OX=9606 GN=EPS8 PE=1 SV=1	0.567	0.199	1.663	1.496	0.38	2.637	1.904	0.899	0.228	-0.82	-2.33	0.73	0.58	-1.4	1.4	0.93	-0.15	-2.13	0.926667	0.593597	0.999451	0.965298	0.757424	0.540322	0.999635	0.87229	0.900254	113.1	64.1	22.6	188.1	169.2	43	60.44	24.87	115.51	74.32	11.4	14.99	202	114	53.8	72.8	64.7	43.7	17.4
QISGQYSGSPQLLK	1xPhospho [S9]	Q96N67	Dedicator of cytokinesis protein 7 OS=Homo sapiens OX=9606 GN=DOCK7 PE=1 SV=4	1.109	0.2	0.445	0.408	0.039	0.368	0.196	0.918	0.088	0.15	-2.33	-1.17	-1.29	-4.68	-1.44	-2.35	-0.12	-3.51	0.999859	0.123722	0.801566	0.184808	0.0060636	0.127429	0.495113	0.784746	0.0500596	187.5	207.9	37.4	83.4	76.5	7.3	17.09	24.3	20.84	21.77	76.78	101.75	200.6	200.7	146.6	258	156.4	222.4	27.2
SSRSSPELTR	1xPhospho [S]	Q9UQ35	Serine/arginine repetitive matrix protein 2 OS=Homo sapiens OX=9606 GN=SRRM2 PE=1 SV=2	0.94	0.2	0.973	1.382	0.754	1.471	3.773	1.42	0.775	-0.09	-2.32	-0.04	0.47	-0.41	0.56	1.92	0.51	-0.37	0.96557	0.00145637	0.969368	0.99744	0.530495	0.99918	0.0255319	0.9994	0.914079	114.3	107.4	22.8	111.2	158	86.2	47.98	19.82	58.78	9.01	34.88	37.22	106	105.5	227.3	99.6	133.2	93.1	15.9
ADSGEEENTKNGGEKGADSGEEKEEGINR	1xDeamidated [N]; 1xPhospho [S19]	Q9BVG4	Protein PBDC1 OS=Homo sapiens OX=9606 GN=PBDC1 PE=1 SV=1	0.153	0.2	0.52	0.553	0.132	3.618	0.661	1.063	0.254	-2.71	-2.32	-0.94	-0.85	-2.92	1.86	-0.6	0.09	-1.98	0.048004	0.141381	0.772378	0.847541	0.0318048	0.294751	0.937552	0.999983	0.260517	234.5	35.9	46.9	122	129.7	31	33.03	38.58	48.92	26.12	28.34	105.56	257.6	230.2	128.7	35.2	64.4	34.1	46
EEDEPEERSGDETPGSEVPGDKAAEEQGDDQDSEK	1xPhospho [S/T]; 1xDeamidated [Q27]	Q1KMD3	Heterogeneous nuclear ribonucleoprotein U-like protein 2 OS=Homo sapiens OX=9606 GN=HNRNPUL2 PE=1 SV=1	0.352	0.2	1.772	1.875	1.131	5.332	5.652	1.058	0.638	-1.51	-2.32	0.83	0.91	0.18	2.41	2.5	0.08	-0.65	0.997012	0.999999	0.957257	0.796641	0.977237	0.959096	0.987934	0.997277	0.999996	94.8	33.3	19	168	177.7	107.2	84.58	131.55	150.44	76.6	40.88	77.61	101.6	91.7	1.8	32.3	233.1	12.8	18.4
SRSDITQVDWR	1xPhospho [S/T]	Q6ZWE6	Pleckstrin homology domain-containing family M member 3 OS=Homo sapiens OX=9606 GN=PLEKHM3 PE=2 SV=2	0.85	0.2	1.037	0.954	0.9	1.122	4.497	0.92	0.868	-0.23	-2.32	0.05	-0.07	-0.15	0.17	2.17	-0.12	-0.2	0.994861	0.000165869	0.999951	1	0.985765	0.99708	0.000408673	0.999822	0.956064	121.4	103.2	24.3	126	115.8	109.3	3.29	5.14	59.37	15.52	10.3	15.34	116.1	122.8	123.1	104.4	101.3	111.9	36.1
RGSPVPPVPERR	1xPhospho [S3]	Q6ZRV2	Protein FAM83H OS=Homo sapiens OX=9606 GN=FAM83H PE=1 SV=3	0.272	0.2	1.605	1.454	1.166	5.345	5.821	0.906	0.727	-1.88	-2.32	0.68	0.54	0.22	2.42	2.54	-0.14	-0.46	0.742914	0.955291	0.964187	0.977257	0.998942	0.358007	0.830624	0.999999	0.997735	105.3	28.7	21.1	169	153.1	122.8	63.39	136.08	123.94	22.11	28.97	50.95	131.6	95.9	26.2	26.1	1.5	158.5	11.8
TNLTSQSSTTNLPGSPGSPGSPGSPGSPGSVPK	1xDeamidated [N/Q]; 1xPhospho [S]	Q6IN85	Serine/threonine-protein phosphatase 4 regulatory subunit 3A OS=Homo sapiens OX=9606 GN=PPP4R3A PE=1 SV=1	0.767	0.201	0.895	0.941	0.216	1.227	1.077	1.051	0.241	-0.38	-2.32	-0.16	-0.09	-2.21	0.3	0.11	0.07	-2.05	0.999992	0.776966	1	0.921238	0.911073	0.873077	0.999498	0.939789	0.888064	149.3	114.4	29.9	133.7	140.5	32.2	64.76	58.11	109.99	59.48	45.02	80.14	153.4	27.9	149.9	114.9	31.5	132.8	30.1
EVEEELATSGGQSPTGEQIPQFQQR	1xPhospho [S/T]	Q9UPN3	Microtubule-actin cross-linking factor 1, isoforms 1/2/3/4/5 OS=Homo sapiens OX=9606 GN=MACF1 PE=1 SV=4	0.068	0.201	1.2	1.185	0.018	17.514	0.091	0.988	0.015	-3.89	-2.32	0.26	0.25	-5.78	4.13	-3.46	-0.02	-6.04	0.459382	0.999958	1	0.999788	0.0532709	0.332142	0.0727905	0.999948	0.0478016	163.4	11.1	32.8	196.1	193.7	3	89.63	41.95	122.81	78.41	80.79	73.17	165.1	11.4	288.8	17.8	7.7	11.2	33
MVVSMPNLQDIAMPELAPR	1xPhospho [S4]; 2xDeamidated [N7; Q9]	A2RUS2	DENN domain-containing protein 3 OS=Homo sapiens OX=9606 GN=DENND3 PE=1 SV=2	0.268	0.201	0.361	0.122	2.1	0.454	10.463	0.337	5.814	-1.9	-2.32	-1.47	-3.04	1.07	-1.14	3.39	-1.57	2.54	0.997856	0.999147	0.998559	0.975679	0.999925	0.99959	0.992056	0.99931	0.989137	148.1	39.7	29.7	53.5	18	311	80.86	154.5	146.33	129.76	141.72	75.85	165	88.8	18.3	5.7	23.8	377.5	17.8
ERPLQQVSPVASVPWR	1xDeamidated [Q]; 1xPhospho [S8]	Q9BY89	Uncharacterized protein KIAA1671 OS=Homo sapiens OX=9606 GN=KIAA1671 PE=1 SV=2	1.786	0.201	1.163	1.104	0.237	0.618	1.18	0.949	0.204	0.84	-2.32	0.22	0.14	-2.08	-0.69	0.24	-0.08	-2.3	0.999893	0.559815	0.99787	0.993139	0.992773	0.968103	0.852759	0.999995	0.919826	109.3	195.1	21.9	127.1	120.7	25.9	62.89	82.99	69.83	49.52	12.22	131.22	28.2	114.2	143.5	204	204.3	5.8	22.9
GGSGSPGPEPPGRPDGPSLLYR	1xPhospho [S]	Q14526	Hypermethylated in cancer 1 protein OS=Homo sapiens OX=9606 GN=HIC1 PE=1 SV=5	1.872	0.201	1.668	1.51	1.639	0.807	8.139	0.905	0.983	0.9	-2.31	0.74	0.59	0.71	-0.31	3.02	-0.14	-0.03	0.599729	0.577205	0.672601	0.730472	0.672741	0.999884	0.0696769	0.999998	1	76	142.4	15.3	126.8	114.8	124.6	62.94	17.89	121.1	7.04	22.7	7.08	109.8	23.4	73.7	104	138	148.5	101.1
SAFSSLQNIPESLR	1xPhospho [S]	Q8TF72	Protein Shroom3 OS=Homo sapiens OX=9606 GN=SHROOM3 PE=1 SV=2	0.841	0.201	0.984	0.741	0.328	0.881	1.628	0.753	0.333	-0.25	-2.31	-0.02	-0.43	-1.61	-0.18	0.7	-0.41	-1.59	0.97751	0.355646	0.992115	0.764018	0.424442	0.986912	0.99999	0.967088	0.735034	146.5	123.2	29.5	144.2	108.6	48	18.06	50.44	33.39	64.23	73.56	80.63	185.7	128.9	167.6	145.3	46.3	141	33.8
VQIPVSRPDPEPVSDNEEDSYDEEIHDPR	1xPhospho [S14]; 1xDeamidated [N16]	Q07157	Tight junction protein ZO-1 OS=Homo sapiens OX=9606 GN=TJP1 PE=1 SV=3	0.289	0.202	0.084	0.201	0.208	0.697	1.032	2.402	2.483	-1.79	-2.31	-3.58	-2.31	-2.26	-0.52	0.04	1.26	1.31	0.999407	0.987321	0.344433	0.978009	0.947408	0.998671	0.999834	0.723696	0.809459	302.3	87.4	61	25.4	60.9	63	81.19	125.02	114.8	89.77	46.55	64.99	273.8	336	16.4	79.1	400.1	15.5	55.3
KREEEEEEEGSIMNGSTAEDEEQTR	1xPhospho [S/T]	Q0ZGT2	Nexilin OS=Homo sapiens OX=9606 GN=NEXN PE=1 SV=1	0.199	0.202	0.172	0.254	0.311	1.276	1.536	1.476	1.808	-2.33	-2.31	-2.54	-1.98	-1.69	0.35	0.62	0.56	0.85	0.561878	0.900786	0.435946	0.938698	0.578331	0.964392	0.985722	0.903154	0.999796	280.6	55.8	56.8	48.3	71.3	87.3	65.78	23.13	89	29.41	91.39	60.47	273	282.6	48.5	70.4	44.5	54.3	215.6
LSTTPSPTSSLHEDGVEDFRR	1xPhospho [S/T]	O94842	TOX high mobility group box family member 4 OS=Homo sapiens OX=9606 GN=TOX4 PE=1 SV=1	0.096	0.203	1.394	1.44	1.129	14.98	5.569	1.033	0.81	-3.38	-2.3	0.48	0.53	0.17	3.91	2.48	0.05	-0.3	0.413159	0.892145	0.999995	0.999992	0.960741	0.482823	0.999854	1	0.980385	114	11	23.1	159	164.2	128.7	2.22	132.3	102.97	65.03	75.04	88.26	119.2	115.8	121	11.5	3.7	80.1	24.2
SSSSSSQPEHSAMLVSTAASPSLIK	1xDeamidated [Q7]; 1xOxidation [M13]; 1xPhospho [S20]	P42166	Lamina-associated polypeptide 2, isoform alpha OS=Homo sapiens OX=9606 GN=TMPO PE=1 SV=2	0.77	0.203	1.395	0.974	3.482	1.266	17.173	0.698	2.496	-0.38	-2.3	0.48	-0.04	1.8	0.34	4.1	-0.52	1.32	0.998628	0.500745	0.991272	1	0.449855	0.997915	0.0285299	0.988571	0.209603	76.7	59	15.6	107	74.7	267.1	48.19	35.2	110.27	81.76	22.32	17.65	35.4	105.3	79.2	60.9	30.9	63.8	16
KSSADTEFSDECTTAER	1xPhospho [S/T]; 1xCarbamidomethyl [C12]	Q9H6S0	3'-5' RNA helicase YTHDC2 OS=Homo sapiens OX=9606 GN=YTHDC2 PE=1 SV=2	0.568	0.203	1.503	1.829	1.271	3.221	6.269	1.217	0.846	-0.82	-2.3	0.59	0.87	0.35	1.69	2.65	0.28	-0.24	0.946839	0.202905	0.996336	0.879319	0.999296	0.419351	0.121248	0.988143	0.999991	94.1	53.5	19.1	141.5	172.2	119.7	51.07	51.33	118.69	48.39	32.88	83.6	55.7	144.5	74.5	85.7	42.3	34.1	76.7
LSGSRQDLIPSYSLGSNK	1xPhospho [S/Y]	Q9NQT8	Kinesin-like protein KIF13B OS=Homo sapiens OX=9606 GN=KIF13B PE=1 SV=2	0.851	0.203	0.852	0.516	0.487	0.606	2.4	0.605	0.571	-0.23	-2.3	-0.23	-0.96	-1.04	-0.72	1.26	-0.72	-0.81	0.881618	0.310187	0.996424	0.526315	0.792263	0.981365	0.936152	0.788399	0.960894	153.5	130.6	31.1	130.8	79.2	74.7	10.29	64.19	106.09	29.18	58.05	18.24	161.9	166.8	137	28.6	137.8	156.6	19.8
RRLSSLRASTSK	3xPhospho [S4; S5; S9]	P62753	Small ribosomal subunit protein eS6 OS=Homo sapiens OX=9606 GN=RPS6 PE=1 SV=1	1.064	0.203	0.866	0.572	0.07	0.537	0.345	0.66	0.081	0.09	-2.3	-0.21	-0.81	-3.84	-0.9	-1.54	-0.6	-3.63	1	6.98899e-07	0.922685	0.0126772	1.44653e-09	0.0112546	1.79313e-05	0.063612	2.53404e-09	159	169.1	32.3	137.6	90.9	11.1	22.35	18.85	15.74	12.13	12.09	14.71	129.7	154.4	200.9	164.2	192.3	131.1	31.4
TQQLHPVLQKPSVFGNDSDDDDETSVSESLQR	1xPhospho [S]	Q9H0G5	Nuclear speckle splicing regulatory protein 1 OS=Homo sapiens OX=9606 GN=NSRP1 PE=1 SV=1	0.066	0.203	0.107	0.18	0.079	2.734	0.39	1.682	0.741	-3.92	-2.3	-3.22	-2.47	-3.65	1.45	-1.36	0.75	-0.43	0.00540986	0.066847	0.00806055	0.0374136	0.00512832	0.850043	0.652318	0.936026	0.999732	366.7	24.2	74.6	39.3	66.1	29.1	63.06	81.21	88	74.74	16.34	53.52	672	274.7	222.6	18.1	56.4	13	20.9
DHSSQSEEEVVEGEKEVEALKK	1xDeamidated [Q5]; 1xPhospho [S6]	O60238	BCL2/adenovirus E1B 19 kDa protein-interacting protein 3-like OS=Homo sapiens OX=9606 GN=BNIP3L PE=1 SV=1	1.677	0.204	0.274	1.102	0.061	0.657	0.301	4.019	0.224	0.75	-2.3	-1.87	0.14	-4.03	-0.61	-1.73	2.01	-2.16	0.99999	0.995128	0.999983	0.999944	0.332042	0.999223	0.593684	1	0.40583	138.9	233	28.3	38.1	153.1	8.5	77.77	76.04	126.57	124.89	92.96	68.95	124.4	20.4	196.2	17.9	208.6	212.6	201.2
SQDADSPGSSGAPENLTFK	1xPhospho [S]; 1xDeamidated [N/Q]	P55196	Afadin OS=Homo sapiens OX=9606 GN=AFDN PE=1 SV=3	0.396	0.204	0.709	0.998	0.721	2.523	3.535	1.409	1.017	-1.34	-2.29	-0.5	0	-0.47	1.34	1.82	0.49	0.02	0.508878	0.265991	0.985494	0.68369	0.983538	0.99953	0.589879	0.954123	1	149	58.9	30.4	105.6	148.7	107.4	79.72	78.35	123.62	30.19	79.96	33.79	117.4	120.6	423.5	47.7	9.7	83.1	3.3
SQSESSDEVTELDLSHGKK	1xPhospho [S]	Q86YS7	C2 domain-containing protein 5 OS=Homo sapiens OX=9606 GN=C2CD5 PE=1 SV=1	0.657	0.204	0.495	0.6	0.172	0.914	0.845	1.213	0.349	-0.61	-2.29	-1.02	-0.74	-2.54	-0.13	-0.24	0.28	-1.52	0.99996	0.0454639	0.683232	0.99903	0.0333859	0.999973	0.999963	0.863519	0.338772	191.8	126	39.1	94.9	115.1	33.1	49.42	9.08	14.3	48.06	14.97	74.15	220.2	70.9	198.3	127.5	130.3	150.2	40.5
LHKTEDGGWEWSDDEFDEESEEGKAAISQLR	1xPhospho [S12]	O95747	Serine/threonine-protein kinase OSR1 OS=Homo sapiens OX=9606 GN=OXSR1 PE=1 SV=1	0.392	0.204	0.761	0.858	0.248	2.187	1.217	1.127	0.326	-1.35	-2.29	-0.39	-0.22	-2.01	1.13	0.28	0.17	-1.62	0.448838	0.345314	0.798142	0.984066	0.464496	0.808601	0.999856	0.988058	0.988872	173.2	67.9	35.4	131.9	148.6	43	162.76	79.05	86.2	40.44	159.14	85.5	1098	20.2	25.8	3.1	10.1	21	17.1
LIEGVHPGSLVEKLPDSPALAKK	1xPhospho [S17]	Q13586	Stromal interaction molecule 1 OS=Homo sapiens OX=9606 GN=STIM1 PE=1 SV=3	1.182	0.204	0.937	1.147	1.061	0.971	5.194	1.224	1.132	0.24	-2.29	-0.09	0.2	0.09	-0.04	2.38	0.29	0.18	0.999379	0.382921	1	0.995779	0.897027	0.99998	0.912381	0.9957	0.897726	108.5	128.2	22.2	101.7	124.4	115.1	36.56	26.84	103.64	36.22	45.96	72.07	99.7	69.8	146.2	117.9	94.5	160.2	20.4
YFDSGDYNMAK	1xPhospho [S4]; 1xDeamidated [N8]	P56211; O43768	cAMP-regulated phosphoprotein 19 OS=Homo sapiens OX=9606 GN=ARPP19 PE=1 SV=2 Alpha-endosulfine OS=Homo sapiens OX=9606 GN=ENSA PE=1 SV=1	0.94	0.205	0.948	0.897	0.604	0.955	2.949	0.947	0.637	-0.09	-2.29	-0.08	-0.16	-0.73	-0.07	1.56	-0.08	-0.65	1	0.0369994	1	0.975957	0.875221	0.970228	0.215221	0.984962	0.902752	130.6	122.8	26.7	123.8	117.2	78.9	12.96	18.06	76.19	38.67	69.46	42.17	139.5	131.9	108.1	124	109.4	155.2	6.9
SEPVINNDNPLESNDEK	1xPhospho [S13]	P23497	Nuclear autoantigen Sp-100 OS=Homo sapiens OX=9606 GN=SP100 PE=1 SV=3	0.916	0.206	0.792	0.7	0.763	0.764	3.705	0.883	0.963	-0.13	-2.28	-0.34	-0.52	-0.39	-0.39	1.89	-0.18	-0.05	0.999927	0.109123	0.900212	0.993995	0.872461	0.999463	0.508329	0.995159	1	137.1	125.5	28.2	108.6	95.9	104.6	20.65	12.66	84.46	47.24	18.6	43.55	100.8	152.6	140.5	128.7	102.4	128.9	25.9
GSPSPEKPDVEK	1xPhospho [S]	Q93074	Mediator of RNA polymerase II transcription subunit 12 OS=Homo sapiens OX=9606 GN=MED12 PE=1 SV=4	1.586	0.206	1.547	2.263	1.782	1.427	8.653	1.463	1.152	0.67	-2.28	0.63	1.18	0.83	0.51	3.11	0.55	0.2	0.79566	0.953922	0.674464	0.281845	0.583752	0.913186	0.201154	0.968761	0.999982	71.6	113.5	14.7	110.7	162	127.5	62.75	54.49	121.96	30.43	2.17	21.89	71.3	82.2	16.1	159.5	113.1	44.9	14.7
DRPLSVHLNLGQK	1xPhospho [S5]	P23467	Receptor-type tyrosine-protein phosphatase beta OS=Homo sapiens OX=9606 GN=PTPRB PE=1 SV=3	0.22	0.206	0.071	0.623	0.203	2.839	0.985	8.822	2.873	-2.19	-2.28	-3.82	-0.68	-2.3	1.51	-0.02	3.14	1.52	0.852326	0.706441	0.0979241	0.993442	0.826529	0.987968	0.999881	0.22454	0.529679	258.4	56.7	53.2	18.3	161	52.4	64.86	55.49	92.18	73.12	63.79	79.86	280.6	265.9	50.2	48	58.4	127.6	22.1
NEHRPASALVNPLAR	1xPhospho [S7]	O15027	Protein transport protein Sec16A OS=Homo sapiens OX=9606 GN=SEC16A PE=1 SV=4	0.606	0.206	1.087	0.687	0.126	1.134	0.611	0.632	0.116	-0.72	-2.28	0.12	-0.54	-2.99	0.18	-0.71	-0.66	-3.11	0.488963	0.0546105	0.999948	0.983112	0.083579	0.847374	0.999802	0.949936	0.0605084	161.7	97.9	33.3	175.7	111.1	20.4	4.62	75.14	68.75	9.69	24.72	74.62	167.7	154.8	168	12.3	127.6	101.6	34.6
NKFGSADNIPNLK	1xPhospho [S5]	O94876	Transmembrane and coiled-coil domains protein 1 OS=Homo sapiens OX=9606 GN=TMCC1 PE=1 SV=3	0.457	0.207	1.465	0.993	1.09	2.173	5.271	0.678	0.744	-1.13	-2.27	0.55	-0.01	0.12	1.12	2.4	-0.56	-0.43	0.999999	0.932084	0.959646	0.999929	0.984913	0.999994	0.63034	0.988719	0.999976	115.1	52.6	23.8	168.7	114.3	125.4	69.56	64.06	115.01	59.38	62.63	50.65	131.3	128.3	18.2	58.6	141.1	44.6	26.5
LNTLEPLEDQDLPMNELDESEEEEMITVVLEEAK	1xDeamidated [N/Q]; 1xPhospho [S20]	Q96GA3	Protein LTV1 homolog OS=Homo sapiens OX=9606 GN=LTV1 PE=1 SV=1	1.806	0.207	1.854	2.238	2.116	1.239	10.22	1.207	1.141	0.85	-2.27	0.89	1.16	1.08	0.31	3.35	0.27	0.19	0.99993	0.957962	1	0.999993	0.999871	0.999259	0.990186	0.999965	0.999962	65.1	117.5	13.5	120.7	145.6	137.7	82.26	82.25	125.98	81.08	76.11	85.55	25.5	173.6	75.5	136.4	165.4	6.6	8.2
RSSLLSLMTGKK	1xPhospho [S]	Q6WKZ4	Rab11 family-interacting protein 1 OS=Homo sapiens OX=9606 GN=RAB11FIP1 PE=1 SV=3	0.324	0.207	0.403	0.153	0.153	0.473	0.736	0.38	0.379	-1.62	-2.27	-1.31	-2.71	-2.71	-1.08	-0.44	-1.39	-1.4	0.640404	0.818896	0.986955	0.865808	0.827819	0.99744	1	0.995543	0.990666	267.7	86.8	55.5	108	41.1	40.9	72.67	84.76	43.37	51.73	66.44	85.61	330.1	36.6	306.2	99.3	4.7	136.3	63.5
DIPAPSPPLPLLSGVPPPPPLPPPPPIK	1xPhospho [S]	Q9Y613	FH1/FH2 domain-containing protein 1 OS=Homo sapiens OX=9606 GN=FHOD1 PE=1 SV=3	1.505	0.208	0.17	0.096	1.51	0.064	7.265	0.564	8.87	0.59	-2.27	-2.55	-3.38	0.59	-3.97	2.86	-0.83	3.15	0.998702	0.24725	0.859877	0.676381	0.998783	0.867759	0.407357	0.998984	0.969996	133.7	201.1	27.8	22.8	12.8	201.8	34.23	75.63	79.65	133.57	145.62	73.61	115.3	205.9	121.8	183.2	224.8	20.4	25.3
HIVSNDSSDSDDESHEPKGTENEDAGSDYQSDNQASWIHR	1xPhospho [S/T]	P47712	Cytosolic phospholipase A2 OS=Homo sapiens OX=9606 GN=PLA2G4A PE=1 SV=2	1.455	0.208	2.177	2.084	2.964	1.432	14.258	0.958	1.362	0.54	-2.27	1.12	1.06	1.57	0.52	3.83	-0.06	0.45	0.935443	0.999756	0.981378	0.810609	0.99478	0.999385	0.966277	0.991806	0.999976	60.7	88.3	12.6	132.1	126.5	179.9	118.83	21.1	139.34	77.39	14.92	85	218.6	0.8	63.7	69	106.3	92.7	2.3
LQHGSTETASPSIK	1xPhospho [S/T]	Q8NEY1	Neuron navigator 1 OS=Homo sapiens OX=9606 GN=NAV1 PE=1 SV=2	1.348	0.208	1.469	1.771	1.898	1.313	9.129	1.206	1.292	0.43	-2.27	0.55	0.82	0.92	0.39	3.19	0.27	0.37	0.999316	0.059897	0.899603	0.957024	0.549969	0.995499	0.00344188	0.999938	0.980579	78	105.1	16.2	114.5	138.1	148	62.19	61.73	45.65	3.8	44.86	13.43	38.7	78.2	146.8	165.4	105.5	38.3	32.9
MSCFSRPSMSPTPLDR	1xCarbamidomethyl [C3]; 1xOxidation [M]; 1xPhospho [S/T]	Q9UQ35	Serine/arginine repetitive matrix protein 2 OS=Homo sapiens OX=9606 GN=SRRM2 PE=1 SV=2	0.286	0.209	0.201	1.333	1.011	4.667	4.839	6.615	5.016	-1.81	-2.26	-2.31	0.41	0.02	2.22	2.27	2.73	2.33	0.976104	0.612457	0.49647	0.993543	0.997685	0.804911	0.381065	0.250713	0.290719	148.5	42.4	31	29.9	198	150.1	60.29	69.69	121.4	93.04	44.43	40.37	179.5	39.2	146.2	41.7	119.1	37.2	5.3
AVSDWIDEQEKGSSEQAESDNMDVPPEDDSK	1xPhospho [S]	Q12906	Interleukin enhancer-binding factor 3 OS=Homo sapiens OX=9606 GN=ILF3 PE=1 SV=3	0.172	0.21	1.1	1.985	0.132	11.553	0.629	1.804	0.12	-2.54	-2.25	0.14	0.99	-2.92	3.53	-0.67	0.85	-3.06	0.948485	0.975004	1	0.942349	0.956923	0.527364	0.999998	0.94946	0.950487	130.5	22.4	27.3	143.6	259	17.2	86.5	148.38	130.41	86.35	23.71	137.84	196.8	94.3	18.8	6.2	210.9	16.2	10.9
SFEVEEVETPNSTPPRR	1xPhospho [S/T]	Q9UHD8	Septin-9 OS=Homo sapiens OX=9606 GN=SEPTIN9 PE=1 SV=2	1.23	0.21	1.034	1.161	0.354	0.944	1.689	1.122	0.343	0.3	-2.25	0.05	0.21	-1.5	-0.08	0.76	0.17	-1.55	0.98242	0.702808	0.999999	0.852552	0.988156	0.996045	0.95531	0.890965	0.977642	120.3	147.9	25.2	124.4	139.6	42.6	84.67	57.8	71.37	73.54	42.64	73.19	199.3	12.2	121.6	200.6	149.5	49.3	25.5
MDRDPLGGLADMFGQMPGSGIGTGPGVIQDRFSPTMGR	1xPhospho [S/T]; 1xOxidation [M]	P78344	Eukaryotic translation initiation factor 4 gamma 2 OS=Homo sapiens OX=9606 GN=EIF4G2 PE=1 SV=1	1.224	0.21	0.594	0.057	0.043	0.046	0.204	0.095	0.072	0.29	-2.25	-0.75	-4.14	-4.55	-4.44	-2.29	-3.39	-3.8	1	0.530155	0.982643	0.322873	0.0215566	0.336898	0.342861	0.675404	0.0659935	191.9	234.8	40.3	114	10.9	8.2	47.67	9.12	105.91	107.63	161.12	60.88	132.7	270	120.3	142.1	170	162.3	27.8
WQNDSPTFGEHQLASSSEVQNGSPMSQTETVSR	3xDeamidated [Q2; Q12; N21]; 1xPhospho [S17]	Q9ULI3	Protein HEG homolog 1 OS=Homo sapiens OX=9606 GN=HEG1 PE=1 SV=3	0.161	0.21	0.992	0.882	0.877	5.489	4.178	0.89	0.885	-2.64	-2.25	-0.01	-0.18	-0.19	2.46	2.06	-0.17	-0.18	0.571038	0.160736	1	0.994989	0.997174	0.313679	0.0787432	0.995452	0.997473	145.6	23.4	30.6	144.3	128.4	127.7	58.75	108.95	61.62	59.33	17.53	12	172.9	153.2	40	24.6	124.8	16.6	7.5
SPARTPPASLYHGYLPENGVLRPEPTK	1xPhospho [S/T]; 1xDeamidated [N18]	Q8N3V7	Synaptopodin OS=Homo sapiens OX=9606 GN=SYNPO PE=1 SV=2	1.313	0.21	1.55	1.24	0.42	0.945	1.999	0.8	0.271	0.39	-2.25	0.63	0.31	-1.25	-0.08	1	-0.32	-1.88	0.999977	0.0402266	0.978653	0.998389	0.340129	0.999885	0.742786	0.999569	0.121794	104.7	137.4	22	162.2	129.8	43.9	9.15	31.37	90.79	11.82	10.44	66.66	100.5	108	120.4	152.3	141.8	79.9	22.7
APEPEEEIEEVEESEDEGEDPALDSLSQAIAFQQAK	1xPhospho [S14]; 1xDeamidated [Q28]	Q8TBF4	Zinc finger CCHC-type and RNA-binding motif-containing protein 1 OS=Homo sapiens OX=9606 GN=ZCRB1 PE=1 SV=2	0.175	0.21	1.381	0.636	1.171	3.642	5.574	0.461	0.848	-2.52	-2.25	0.47	-0.65	0.23	1.86	2.48	-1.12	-0.24	0.473259	0.502048	0.999437	0.927927	0.872328	0.936894	0.978843	0.987104	0.965619	131.2	22.9	27.6	181.2	83.5	153.6	139.79	117.14	108.88	30.26	11.72	71.86	769.2	83.1	31.5	11.8	14.5	95.6	89.4
KPPAPPSPVQSQSPSTNWSPAVPVKK	4xPhospho [S7; S11; S13; S15]; 1xDeamidated [N/Q]	Q8IYB3	Serine/arginine repetitive matrix protein 1 OS=Homo sapiens OX=9606 GN=SRRM1 PE=1 SV=2	0.744	0.21	0.324	1.393	0.405	1.872	1.927	4.307	1.252	-0.43	-2.25	-1.63	0.48	-1.3	0.9	0.95	2.11	0.32	0.90428	0.359195	0.671607	0.98869	0.833387	0.602759	0.942868	0.347122	0.999519	147.2	109.6	30.9	47.6	205.1	59.6	9.88	46.81	89.03	103.41	9.54	91.18	138.1	132.5	113.9	99.5	35.8	98.6	27.8
GQGESDPLDHEPAVSPLLPR	1xPhospho [S15]	P00519	Tyrosine-protein kinase ABL1 OS=Homo sapiens OX=9606 GN=ABL1 PE=1 SV=4	0.287	0.21	0.199	0.199	0.148	0.693	0.705	0.999	0.744	-1.8	-2.25	-2.33	-2.33	-2.76	-0.53	-0.51	0	-0.43	0.833849	0.550693	0.627148	0.687673	0.490971	0.999694	0.999997	0.999998	0.999857	293.6	84.3	61.7	58.5	58.4	43.5	20.14	73.9	94.6	93.62	103.18	112.93	213	190.6	141.5	173.2	54.8	52.4	154.7
NYQQNYQNSESGEKNEGSESAPEGQAQQR	2xDeamidated [N/Q]; 1xPhospho [S/Y]	P67809	Y-box-binding protein 1 OS=Homo sapiens OX=9606 GN=YBX1 PE=1 SV=3	1.09	0.21	0.235	1.268	0.507	1.163	2.411	5.399	2.16	0.12	-2.25	-2.09	0.34	-0.98	0.22	1.27	2.43	1.11	0.992676	0.55578	0.673562	0.98346	0.867887	0.999997	0.989825	0.954455	0.998613	139.2	151.8	29.3	32.7	176.5	70.6	34.36	68.98	100.99	124.67	65.34	71.7	118.7	122.4	210	32.9	133.5	200.4	20.7
SVAVSDEEEVEEEAER	1xPhospho [S5]	Q9Y6X9	ATPase MORC2 OS=Homo sapiens OX=9606 GN=MORC2 PE=1 SV=2	0.98	0.211	0.487	0.497	0.079	0.508	0.377	1.021	0.163	-0.03	-2.25	-1.04	-1.01	-3.65	-0.98	-1.41	0.03	-2.62	0.999993	0.379842	0.889885	0.352704	0.0198898	0.415125	0.46043	0.896946	0.11522	184.4	180.6	38.8	89.9	91.7	14.6	29.91	24.21	88.44	23.63	83.23	57.5	171.6	126.7	232	198.5	120.5	168.1	36.1
HMDPPPAPVQDRSPSPR	1xDeamidated [Q10]; 1xPhospho [S13]	P46821	Microtubule-associated protein 1B OS=Homo sapiens OX=9606 GN=MAP1B PE=1 SV=2	0.159	0.211	1.081	0.614	1.07	3.859	5.078	0.568	0.99	-2.65	-2.25	0.11	-0.7	0.1	1.95	2.34	-0.82	-0.01	0.920512	0.890354	0.991883	1	1	0.908775	0.873784	0.994018	0.994353	145.1	23.1	30.6	156.8	89.1	155.3	65.14	127.51	137.25	22.86	1.65	77.09	152.3	137.3	26.6	21.9	10.9	152.2	4.8
DSLGAYASQDANEQGQDLGKR	1xPhospho [S2]; 1xDeamidated [Q9]	Q9C0C2	182 kDa tankyrase-1-binding protein OS=Homo sapiens OX=9606 GN=TNKS1BP1 PE=1 SV=4	0.916	0.211	1.253	0.484	1.323	0.529	6.26	0.386	1.056	-0.13	-2.24	0.33	-1.05	0.4	-0.92	2.65	-1.37	0.08	0.999475	0.971835	0.882866	0.999968	0.869719	0.995571	0.472177	0.80461	1	115.7	105.9	24.4	144.9	56	153	84.3	75.78	32.27	27.21	103.08	28.12	127.8	173.7	6.3	165.6	17.1	117.1	18.5
RQSCYLCDLPR	1xPhospho [S3]; 2xCarbamidomethyl [C4; C7]	Q9H1B7; Q7Z5L9	Probable E3 ubiquitin-protein ligase IRF2BPL OS=Homo sapiens OX=9606 GN=IRF2BPL PE=1 SV=1 Interferon regulatory factor 2-binding protein 2 OS=Homo sapiens OX=9606 GN=IRF2BP2 PE=1 SV=2	0.847	0.212	1.24	1.163	1.041	1.373	4.919	0.937	0.839	-0.24	-2.24	0.31	0.22	0.06	0.46	2.3	-0.09	-0.25	0.999255	0.0779942	0.990186	0.996279	0.998949	0.959904	0.139809	0.888412	0.999903	109.1	92.3	23.1	135.3	126.8	113.5	48.1	40.82	19.92	70.48	3.37	47.03	177.8	122.1	61.8	57	103.4	137.9	25.8
SRDSDESGDKTTR	1xPhospho [S]	Q5JTV8	Torsin-1A-interacting protein 1 OS=Homo sapiens OX=9606 GN=TOR1AIP1 PE=1 SV=2	0.684	0.212	0.986	0.838	1.016	1.225	4.803	0.849	1.03	-0.55	-2.24	-0.02	-0.26	0.02	0.29	2.26	-0.24	0.04	0.771026	0.190913	0.969878	1	0.999999	0.782893	0.168117	0.973556	0.953618	126.7	86.6	26.8	125	106.1	128.8	16.68	37.62	104.65	57.86	33.41	5.69	103.4	144.3	121.6	39.7	87.1	83.1	119.2
EGEKGQNGDDSSAGGDFPPPAEVEPTPEAELLAQPCHDSEASK	2xDeamidated [Q6; N7]; 2xPhospho [S11; S12]; 1xCarbamidomethyl [C36]	O94992	Protein HEXIM1 OS=Homo sapiens OX=9606 GN=HEXIM1 PE=1 SV=1	0.336	0.212	0.333	0.253	1.419	0.753	6.703	0.761	4.266	-1.57	-2.24	-1.59	-1.98	0.51	-0.41	2.74	-0.39	2.09	0.999971	0.999966	0.99605	0.999291	0.995335	0.999981	0.981299	0.999988	0.916849	168.9	56.7	35.8	56.2	42.8	239.7	81.02	20.85	116.21	120.27	24.8	82.12	9	165.7	193.1	43.8	66.9	55.7	22.4
GYSSLDQSPDEKPLVALDTDSDDDFDMSR	2xPhospho [S/T]	Q8IW50	Protein FAM219A OS=Homo sapiens OX=9606 GN=FAM219A PE=1 SV=3	0.934	0.212	1.281	1.561	1.204	1.672	5.681	1.218	0.94	-0.1	-2.24	0.36	0.64	0.27	0.74	2.51	0.29	-0.09	0.932806	0.998832	0.949961	0.762379	0.606169	0.998107	0.403748	0.996152	0.970055	96.9	90.5	20.5	124.2	151.3	116.7	86.38	23.12	82.12	61.63	29.83	142.8	92.9	2.4	66.3	61.9	75.8	47.3	8.5
LCLSEHSSEDDRR	1xCarbamidomethyl [C2]; 1xPhospho [S]	O95980	Reversion-inducing cysteine-rich protein with Kazal motifs OS=Homo sapiens OX=9606 GN=RECK PE=1 SV=1	1.463	0.212	1.273	1.697	1.52	1.16	7.169	1.332	1.194	0.55	-2.24	0.35	0.76	0.6	0.21	2.84	0.41	0.26	0.998008	0.999497	0.981663	0.987138	0.959359	0.89667	0.86201	1	0.99999	83.7	122.5	17.8	106.6	142.1	127.3	73.81	88.09	130.38	34.19	64.53	23.58	99	94.7	10.1	0.8	179.5	138.5	9.7
SMSAAFCSLLAPER	1xOxidation [M2]; 1xPhospho [S3]; 1xCarbamidomethyl [C7]	Q13671	Ras and Rab interactor 1 OS=Homo sapiens OX=9606 GN=RIN1 PE=1 SV=4	0.187	0.212	0.099	0.102	0.146	0.546	0.689	1.03	1.47	-2.42	-2.24	-3.33	-3.29	-2.77	-0.87	-0.54	0.04	0.56	0.999828	0.967811	0.79541	0.620897	0.937314	0.760444	0.999991	0.999445	0.998954	343.3	64.4	72.9	34.1	35.1	50.2	79.74	101.96	30.83	148.18	51.4	38.51	17.5	310.3	325.4	284.6	58.2	49.5	65.9
EKEEKESEDKPEIEDVGSDEEEEKK	1xPhospho [S18]	P07900	Heat shock protein HSP 90-alpha OS=Homo sapiens OX=9606 GN=HSP90AA1 PE=1 SV=5	0.496	0.213	1.689	0.928	0.556	1.869	2.614	0.549	0.329	-1.01	-2.23	0.76	-0.11	-0.85	0.9	1.39	-0.86	-1.6	0.995855	0.260756	0.95144	1	0.880631	0.992431	0.812988	0.965392	0.431051	122.9	61	26.1	207.6	114	68.3	72.66	60.44	88	21.95	49.74	77.84	129.6	216.4	32.9	123.7	35.4	64.3	48.2
SQEPIPDDQKVSDDDKEKGEGALPTGK	1xDeamidated [Q]; 1xPhospho [S12]	Q86UE4	Protein LYRIC OS=Homo sapiens OX=9606 GN=MTDH PE=1 SV=2	0.219	0.213	0.781	1.55	0.964	7.073	4.529	1.986	1.235	-2.19	-2.23	-0.36	0.63	-0.05	2.82	2.18	0.99	0.3	0.797065	0.89117	0.998709	0.999455	0.866615	0.925236	1	1	0.973325	127	27.8	27	99.1	196.8	122.3	61.51	13.83	101.44	71.93	81.29	84.4	58.3	142.3	237.9	27	31.2	35.7	16.7
[truncated: 13,591 more rows]
[truncated: 47 more columns]

## Sheet: LLOMe 30 min for volcano
Sequence	Modifications	Master Protein Accessions	Master Protein Descriptions	Log2FC (LLOMe 30min/ Control)	-Log10Pvalue (LLOMe 30min / Control)	P-Value: (LLOMe 30min / Control)
TNGITYASVALATSK	1xPhospho [T/Y]	P35670	Copper-transporting ATPase 2 OS=Homo sapiens OX=9606 GN=ATP7B PE=1 SV=4	-9.1	0.251662	0.560193
[truncated: 14,518 more rows]

## Sheet: LLOMe 30 min not significant
Sequence	Modifications	Master Protein Accessions	Master Protein Descriptions	Log2FC (LLOMe 30min/ Control)	-Log10Pvalue (LLOMe 30min / Control)
[truncated: 13,846 more rows]

[truncated: 3 more sheets: LLOMe 30 min significantly UP, LLOMe 30 min significantly DOWN, 30 min significantly UP Scatter]
